# Supplementary material for: Functional Analyses of Trichoderma reesei LAE1 Reveal Conserved and Contrasting Roles of This Regulator
Source: PubMed Central journal article supplement (PMC3564997; doi:10.1534/g3.112.005140), 2013-02-01
Supplement: supp_3.2.369_TableS1.pdf [file supp_3.2.369_TableS1.pdf]

**Table S1 Primers used for qPCR in this study**

| Gene          | sequence (primer forward 5'→3') | sequence (primer reverse 5'→3') | primer efficiency (%) | Tm (°C) |
|---------------|---------------------------------|---------------------------------|-----------------------|---------|
| <i>ve11</i>   | AGCCTTATGTGCCTCACT              | GCAGGAGCAGAGTAGTTG              | 100                   | 57.2    |
| <i>lae1</i>   | ACTGGAGATTGACTGGATGC            | TTCTGCGTCTGGTAGCCTC             | 100                   | 62.9    |
| Trire2:23171  | GGTGGCTGTAGATGTGTT              | TGAGAGTCGTCGTTGAAG              | 100                   | 57.2    |
| Trire2:112083 | GGTGAAGAGATACGGTAT              | TGAGTTGGAGTAGATGTC              | 100                   | 52.6    |
| Trire2:109101 | GAATCCAGTGGCATTCTATC            | CGACCCTCAATAATATCATAACC         | 100                   | 57.1    |
| Trire2:69187  | GCCTCTACCAATGAACCTC             | CCGAGACAGGACATAATC              | 97.2                  | 56.1    |
| Trire2:107071 | CGATTGCCGTCTACGATAT             | GCTCAGTTGTCCAGTCAT              | 100                   | 56.1    |
| Trire2:111494 | ATCAACCAGACAGACAAC              | AGATATAGACTTGCTCACATAG          | 95                    | 52.6    |
| Trire2:122824 | CGTATGGCACCATCATTGG             | CTGGGAAGACTCGTCGGAG             | 100                   | 64      |
| Trire2:39587  | CTTGACAACCCGCCAAACAG            | CGATGGAGTAAAAGACACCG            | 87.5                  | 62      |
| Trire2:82041  | CTCATCGTCTTCCCCATTC             | CATGCTTGTGTTGTGCCCTG            | 100                   | 62      |
| Trire2:69904  | CGGGAGACATTTGCCTTTATC           | CAGAAGCAGGTCGCAGAGTAG           | 86                    | 64      |
| Trire2:5647   | CTACAACCCCGATAACCTC             | CGTGGAAGATGCGGTAGTAC            | 98.5                  | 60      |
| Trire2:110744 | CCTCTACGCCTCGTCAATC             | CAATGGCGGAGAAGAAGAAGC           | 85                    | 62      |
| Trire2:110339 | GATGCCGCTGATTGCCAC              | CGAGATCGGTGATGATGTCG            | 91                    | 65      |
| Trire2:62462  | CACGAACCCAACGCTCCAAC            | CGAAGTATGCCCACTCCAG             | 95.5                  | 63      |
| Trire2:121990 | CTCAAGGTAGTTGCGGTG              | CGTCATCTGGTGGCTGTTG             | 90                    | 60      |
| Trire2:76763  | CGGCAGAGGTTGAGCAATAC            | CGGTAACACGGAGGCGTTTC            | 89                    | 64      |
| Trire2:105224 | CACCGCTTGCCATCATCTTC            | CAAGAGGAATCCCAAGACAC            | 100                   | 61      |
| <i>sar1</i>   | TGGATCGTCAACTGTTCTACGA          | GCATGTGTAGCAACGTGGTCTTT         | 64                    | 64      |
