# Supplementary material for: Functional Analyses of Trichoderma reesei LAE1 Reveal Conserved and Contrasting Roles of This Regulator
Source: PubMed Central journal article supplement (PMC3564997; doi:10.1534/g3.112.005140), 2013-02-01
Supplement: supp_3.2.369_TableS2.pdf [file supp_3.2.369_TableS2.pdf]

**Table S2 Genes differentially expressed in *T. reesei* strains modulated in *lae1* function\***

| SEQ_ID | wild-type | S.D. | <i>Δlae1</i> | S.D. | <i>lae1OE</i> | S.D. | ratio [ <i>Δlae1</i> ] | ratio [ <i>lae1OE</i> ] | p-value | F- value |                                               |
|--------|-----------|------|--------------|------|---------------|------|------------------------|-------------------------|---------|----------|-----------------------------------------------|
| 1959   | 6.55      | 0.23 | 6.99         | 0.07 | 8.78          | 0.15 | 1.359 up               | 4.687 up                | 0.00    | 166.52   | Haloacid dehalogenase-like hydrolase          |
| 1977   | 12.71     | 0.03 | 12.57        | 0.04 | 11.58         | 0.14 | 1.106 down             | 2.191 down              | 0.00    | 89.50    | Peptidase_M28                                 |
| 1993   | 12.52     | 0.05 | 12.44        | 0.14 | 11.27         | 0.09 | 1.057 down             | 2.381 down              | 0.00    | 151.74   | γ-glutamyl phosphate reductase GPR            |
| 2033   | 4.81      | 0.06 | 3.30         | 0.04 | 5.95          | 0.13 | 2.855 down             | 2.205 up                | 0.00    | 404.26   | unknown protein                               |
| 2036   | 6.24      | 0.02 | 6.11         | 0.09 | 7.75          | 0.16 | 1.090 down             | 2.856 up                | 0.00    | 142.94   | cysteine peptidase                            |
| 2071   | 9.68      | 0.07 | 10.58        | 0.09 | 10.86         | 0.09 | 1.875 up               | 2.266 up                | 0.00    | 123.87   | unknown protein. 5 TM                         |
| 2076   | 9.84      | 0.10 | 6.09         | 0.11 | 6.75          | 0.45 | 13.496 down            | 8.504 down              | 0.00    | 67.36    | malate permease                               |
| 2091   | 12.79     | 0.03 | 12.11        | 0.17 | 11.37         | 0.08 | 1.604 down             | 2.676 down              | 0.00    | 136.90   | 6-phosphofructokinase                         |
| 2096   | 9.25      | 0.02 | 9.96         | 0.15 | 7.47          | 0.31 | 1.637 up               | 3.429 down              | 0.00    | 76.37    | Zn2Cys6 transcriptional regulator             |
| 2125   | 12.16     | 0.01 | 12.35        | 0.05 | 11.13         | 0.10 | 1.146 up               | 2.029 down              | 0.00    | 188.64   | Fructose-2.6-bisphosphatase                   |
| 2148   | 13.15     | 0.02 | 12.06        | 0.21 | 11.74         | 0.24 | 2.133 down             | 2.651 down              | 0.00    | 30.59    | Zn2Cys6 transcriptional regulator             |
| 2185   | 5.85      | 0.02 | 6.67         | 0.15 | 8.71          | 0.36 | 1.764 up               | 7.251 up                | 0.00    | 76.38    | GCN5-related N-acetyltransferase              |
| 2223   | 8.84      | 0.12 | 9.08         | 0.13 | 10.23         | 0.22 | 1.178 up               | 2.618 up                | 0.00    | 45.43    | succinate-CoA ligase. alpha subunit           |
| 2316   | 12.36     | 0.10 | 10.37        | 0.27 | 10.33         | 0.10 | 3.965 down             | 4.082 down              | 0.00    | 141.24   | unknown protein with caleosin domain          |
| 2322   | 9.61      | 0.01 | 9.18         | 0.14 | 8.22          | 0.17 | 1.344 down             | 2.612 down              | 0.00    | 65.81    | unknown protein                               |
| 2358   | 9.66      | 0.06 | 9.32         | 0.03 | 8.12          | 0.28 | 1.269 down             | 2.915 down              | 0.00    | 40.58    | unknown protein with HIT domain               |
| 2392   | 14.29     | 0.09 | 14.02        | 0.04 | 12.19         | 0.23 | 1.209 down             | 4.288 down              | 0.00    | 117.02   | peroxisomal hydratase-dehydrogenase-epimerase |
| 2399   | 11.59     | 0.01 | 11.51        | 0.10 | 9.90          | 0.08 | 1.056 down             | 3.210 down              | 0.00    | 457.97   | unknown protein                               |
| 2489   | 6.70      | 0.04 | 5.83         | 0.06 | 8.45          | 0.38 | 1.820 down             | 3.356 up                | 0.00    | 59.33    | Ribonuclease T2                               |
| 2492   | 10.31     | 0.17 | 9.44         | 0.02 | 8.18          | 0.24 | 1.832 down             | 4.378 down              | 0.00    | 78.04    | Phosphatidylinositol-4-phosphate 5-kinase     |
| 2499   | 7.61      | 0.09 | 7.85         | 0.04 | 5.36          | 0.27 | 1.182 up               | 4.741 down              | 0.00    | 122.47   | unknown protein                               |
| 2517   | 4.72      | 0.08 | 4.23         | 0.05 | 5.82          | 0.41 | 1.399 down             | 2.149 up                | 0.01    | 18.41    | Flavoprotein monooxygenase. putative          |
| 2526   | 13.57     | 0.02 | 13.29        | 0.14 | 12.56         | 0.14 | 1.215 down             | 2.010 down              | 0.00    | 50.83    | Protein kinase C                              |
| 2570   | 3.28      | 0.07 | 3.82         | 0.24 | 4.83          | 0.08 | 1.448 up               | 2.929 up                | 0.00    | 105.25   | short chain dehydrogenase/reductase           |
| 2687   | 12.56     | 0.07 | 10.54        | 0.17 | 10.90         | 0.10 | 4.071 down             | 3.173 down              | 0.00    | 197.49   | AAA ATPase                                    |
| 2703   | 11.87     | 0.14 | 11.97        | 0.04 | 10.62         | 0.24 | 1.074 up               | 2.372 down              | 0.00    | 41.84    | unknown protein                               |

|      |       |      |       |      |       |      |             |             |      |        |                                             |
|------|-------|------|-------|------|-------|------|-------------|-------------|------|--------|---------------------------------------------|
| 2730 | 13.28 | 0.05 | 13.24 | 0.00 | 12.16 | 0.20 | 1.024 down  | 2.171 down  | 0.00 | 47.38  | unknown protein                             |
| 2745 | 12.92 | 0.02 | 12.76 | 0.13 | 11.80 | 0.12 | 1.115 down  | 2.175 down  | 0.00 | 91.93  | fumarate hydratase-like protein             |
| 2835 | 11.99 | 0.01 | 11.83 | 0.01 | 10.80 | 0.21 | 1.112 down  | 2.275 down  | 0.00 | 44.84  | unknown protein                             |
| 3043 | 3.23  | 0.03 | 3.71  | 0.18 | 5.11  | 0.18 | 1.393 up    | 3.664 up    | 0.00 | 105.89 | SSCRP                                       |
| 3049 | 13.72 | 0.39 | 12.80 | 0.01 | 10.85 | 0.08 | 1.898 down  | 7.341 down  | 0.00 | 181.03 | methionine aminopeptidase                   |
| 3055 | 12.48 | 0.15 | 7.97  | 0.14 | 11.17 | 0.12 | 22.757 down | 2.485 down  | 0.00 | 651.11 | short chain dehydrogenase/reductase         |
| 3094 | 5.60  | 0.12 | 5.26  | 0.11 | 7.17  | 0.67 | 1.265 down  | 2.986 up    | 0.02 | 11.46  | GH30 glucan endo 1.6-β-glucanase            |
| 3121 | 3.35  | 0.46 | 3.82  | 0.25 | 4.97  | 0.12 | 1.379 up    | 3.066 up    | 0.00 | 31.51  | cytochrome P450 oxidoreductase OrdA-like    |
| 3196 | 12.47 | 0.11 | 12.28 | 0.05 | 10.80 | 0.16 | 1.138 down  | 3.171 down  | 0.00 | 131.28 | GH38 α-mannosidase                          |
| 3262 | 3.61  | 0.03 | 4.01  | 0.01 | 5.31  | 0.21 | 1.315 up    | 3.244 up    | 0.00 | 86.89  | succinate semialdehyde dehydrogenase (NADP) |
| 3267 | 9.12  | 0.02 | 10.14 | 0.06 | 7.30  | 0.31 | 2.019 up    | 3.543 down  | 0.00 | 100.17 | MRSP1/expansin-like                         |
| 3350 | 11.77 | 0.18 | 12.11 | 0.24 | 10.76 | 0.31 | 1.265 up    | 2.002 down  | 0.01 | 18.73  | phosphopantothenate-cysteine ligase         |
| 3364 | 11.25 | 0.06 | 10.43 | 0.11 | 9.12  | 0.17 | 1.768 down  | 4.386 down  | 0.00 | 156.98 | Zinc-containing alcohol dehydrogenase       |
| 3422 | 6.69  | 0.30 | 6.91  | 0.15 | 8.76  | 0.41 | 1.166 up    | 4.207 up    | 0.00 | 31.17  | unknown protein with oxidoreductase domain  |
| 3462 | 12.11 | 0.15 | 12.22 | 0.06 | 11.06 | 0.24 | 1.083 up    | 2.060 down  | 0.00 | 30.58  | UreF urease accessory protein               |
| 3481 | 10.81 | 0.10 | 10.51 | 0.24 | 9.67  | 0.22 | 1.236 down  | 2.211 down  | 0.01 | 23.75  | unknown protein                             |
| 3488 | 11.29 | 0.09 | 9.77  | 0.05 | 9.93  | 0.21 | 2.876 down  | 2.578 down  | 0.00 | 55.13  | unknown protein                             |
| 3501 | 9.18  | 0.12 | 8.88  | 0.13 | 8.15  | 0.24 | 1.227 down  | 2.035 down  | 0.01 | 19.64  | unknown protein                             |
| 3529 | 10.62 | 0.10 | 11.31 | 0.32 | 11.99 | 0.16 | 1.613 up    | 2.586 up    | 0.00 | 33.87  | unknown protein                             |
| 3568 | 10.27 | 0.07 | 7.85  | 0.24 | 8.39  | 0.27 | 5.337 down  | 3.682 down  | 0.00 | 62.06  | phospholipase A2                            |
| 3579 | 7.68  | 0.00 | 7.74  | 0.19 | 9.71  | 0.27 | 1.046 up    | 4.104 up    | 0.00 | 79.80  | ATP-dependent RNA helicases.                |
| 3596 | 7.86  | 0.25 | 7.31  | 0.09 | 8.90  | 0.43 | 1.470 down  | 2.050 up    | 0.01 | 14.87  | uroporphyrinogen synthase                   |
| 3605 | 11.24 | 0.02 | 10.78 | 0.07 | 9.96  | 0.17 | 1.377 down  | 2.431 down  | 0.00 | 67.96  | Zn2Cys6 transcriptional regulator           |
| 3835 | 10.40 | 0.27 | 10.40 | 0.01 | 8.73  | 0.33 | 1.002 down  | 3.172 down  | 0.00 | 34.15  | 3-ketoacyl-CoA thiolase                     |
| 3889 | 13.56 | 0.12 | 13.42 | 0.01 | 12.31 | 0.33 | 1.099 down  | 2.382 down  | 0.01 | 21.19  | unknown protein                             |
| 3909 | 9.25  | 0.02 | 10.02 | 0.11 | 10.58 | 0.44 | 1.710 up    | 2.528 up    | 0.03 | 10.22  | Mitochondrial ribosomal protein L43         |
| 3914 | 10.64 | 0.03 | 7.12  | 0.09 | 6.78  | 0.89 | 11.485 down | 14.492 down | 0.01 | 22.27  | Endoplasmic reticulum protein EP58          |
| 4040 | 11.23 | 0.04 | 10.80 | 0.00 | 10.10 | 0.21 | 1.353 down  | 2.187 down  | 0.00 | 35.16  | RNA polymerase Rpc34 subunit                |
| 4064 | 11.58 | 0.07 | 11.92 | 0.04 | 13.18 | 0.09 | 1.267 up    | 3.025 up    | 0.00 | 345.65 | Threonine dehydratase                       |
| 4069 | 11.64 | 0.03 | 11.63 | 0.09 | 10.33 | 0.29 | 1.008 down  | 2.480 down  | 0.00 | 32.07  | AMP-dependent synthetase and ligase         |

|      |       |      |       |      |       |      |              |            |      |         |                                                             |
|------|-------|------|-------|------|-------|------|--------------|------------|------|---------|-------------------------------------------------------------|
| 4109 | 9.86  | 0.05 | 10.13 | 0.00 | 8.71  | 0.20 | 1.204 up     | 2.228 down | 0.00 | 68.66   | Aspartate/tyrosine/aromatic aminotransferase                |
| 4114 | 6.26  | 0.36 | 3.21  | 0.04 | 5.03  | 0.19 | 8.272 down   | 2.337 down | 0.00 | 96.40   | FAD linked oxidase                                          |
| 4124 | 6.34  | 0.08 | 10.60 | 0.10 | 9.84  | 0.11 | 19.177 up    | 11.315 up  | 0.00 | 1042.30 | myb transcriptional regulator                               |
| 4171 | 9.30  | 0.15 | 6.01  | 0.14 | 7.97  | 0.19 | 9.788 down   | 2.519 down | 0.00 | 177.10  | calcium transporter                                         |
| 4240 | 11.22 | 0.06 | 8.06  | 0.05 | 8.02  | 0.08 | 8.960 down   | 9.188 down | 0.00 | 1420.23 | stress response protein Rds1; secreted                      |
| 4308 | 12.63 | 0.13 | 11.85 | 0.03 | 11.62 | 0.17 | 1.717 down   | 2.021 down | 0.00 | 32.90   | Aminopeptidase N                                            |
| 4428 | 10.26 | 0.15 | 9.95  | 0.05 | 9.19  | 0.25 | 1.234 down   | 2.098 down | 0.01 | 20.69   | unknown protein. TPR domain                                 |
| 4442 | 8.19  | 0.00 | 6.96  | 0.11 | 6.43  | 0.27 | 2.342 down   | 3.378 down | 0.00 | 43.60   | SAM-dependent methyltransferase                             |
| 4479 | 11.44 | 0.06 | 12.11 | 0.22 | 12.65 | 0.27 | 1.597 up     | 2.318 up   | 0.01 | 18.26   | small nuclear ribonucleoprotein Sm D2                       |
| 4494 | 12.22 | 0.06 | 11.93 | 0.08 | 10.60 | 0.35 | 1.224 down   | 3.085 down | 0.00 | 29.62   | unknown protein                                             |
| 4517 | 5.19  | 0.02 | 6.20  | 0.13 | 9.04  | 0.17 | 2.027 up     | 14.425 up  | 0.00 | 577.36  | Cytochrome P450 CYP4/CYP19/CYP26 subfamilies                |
| 4561 | 9.77  | 0.08 | 8.32  | 0.02 | 8.41  | 0.19 | 2.718 down   | 2.569 down | 0.00 | 64.60   | GT $\alpha$ -1.6-mannosyltransferase                        |
| 4626 | 13.27 | 0.26 | 11.88 | 0.16 | 10.95 | 0.44 | 2.627 down   | 5.010 down | 0.01 | 26.50   | unknown protein. C2 domain                                  |
| 4677 | 11.12 | 0.05 | 11.06 | 0.06 | 9.69  | 0.18 | 1.045 down   | 2.710 down | 0.00 | 92.34   | unknown protein                                             |
| 4726 | 12.92 | 0.10 | 12.89 | 0.11 | 11.52 | 0.24 | 1.022 down   | 2.629 down | 0.00 | 47.56   | Cytochrome P450 monooxygenase                               |
| 4737 | 10.89 | 0.06 | 9.58  | 0.02 | 9.10  | 0.23 | 2.471 down   | 3.457 down | 0.00 | 68.07   | arylamine N-acetyltransferase 1                             |
| 4748 | 12.15 | 0.14 | 12.09 | 0.11 | 11.00 | 0.16 | 1.042 down   | 2.213 down | 0.00 | 57.75   | C2H2 transcription factor                                   |
| 4847 | 10.92 | 0.10 | 10.62 | 0.14 | 9.76  | 0.10 | 1.229 down   | 2.232 down | 0.00 | 83.73   | unknown protein                                             |
| 4851 | 11.76 | 0.07 | 4.15  | 0.23 | 9.82  | 0.18 | 194.650 down | 3.832 down | 0.00 | 1034.06 | unknown protein                                             |
| 4875 | 11.39 | 0.14 | 10.78 | 0.01 | 9.28  | 0.23 | 1.521 down   | 4.324 down | 0.00 | 98.04   | carboxy-cis-cis-muconate cyclase                            |
| 4876 | 12.36 | 0.17 | 11.02 | 0.00 | 10.03 | 0.30 | 2.534 down   | 5.033 down | 0.00 | 61.72   | catechol dioxygenase                                        |
| 4905 | 6.27  | 0.39 | 8.16  | 0.27 | 7.78  | 0.52 | 3.713 up     | 2.852 up   | 0.03 | 10.27   | unknown protein                                             |
| 4921 | 12.88 | 0.17 | 12.46 | 0.04 | 11.80 | 0.25 | 1.338 down   | 2.114 down | 0.01 | 19.91   | C2H2 transcriptional regulator                              |
| 4941 | 12.34 | 0.04 | 11.96 | 0.00 | 9.37  | 0.39 | 1.301 down   | 7.840 down | 0.00 | 83.15   | phenylacetyl-CoA ligase.                                    |
| 4945 | 11.80 | 0.15 | 11.97 | 0.02 | 10.80 | 0.07 | 1.121 up     | 2.001 down | 0.00 | 152.39  | MAPKKK mitogen activated protein kinase kinase kinase Ste11 |
| 4950 | 9.73  | 0.04 | 9.36  | 0.00 | 8.62  | 0.21 | 1.291 down   | 2.153 down | 0.00 | 35.56   | urea transporter                                            |
| 4952 | 6.59  | 0.24 | 5.49  | 0.12 | 8.11  | 0.17 | 2.137 down   | 2.872 up   | 0.00 | 157.24  | unknown protein                                             |
| 4999 | 9.24  | 0.39 | 13.25 | 0.25 | 12.64 | 0.23 | 16.108 up    | 10.569 up  | 0.00 | 133.02  | cytochrome P450 monooxygenase                               |
| 5000 | 5.37  | 0.36 | 6.35  | 0.04 | 7.11  | 0.55 | 1.974 up     | 3.348 up   | 0.03 | 9.95    | MFS permease                                                |
| 5026 | 8.75  | 0.02 | 10.14 | 0.03 | 10.74 | 0.12 | 2.634 up     | 3.969 up   | 0.00 | 288.54  | SSCRP                                                       |

|      |       |      |       |      |       |      |            |             |      |        |                                               |
|------|-------|------|-------|------|-------|------|------------|-------------|------|--------|-----------------------------------------------|
| 5063 | 12.65 | 0.04 | 11.93 | 0.09 | 11.16 | 0.25 | 1.647 down | 2.797 down  | 0.00 | 39.15  | unknown protein                               |
| 5072 | 8.79  | 0.05 | 9.00  | 0.08 | 9.98  | 0.12 | 1.160 up   | 2.286 up    | 0.00 | 113.58 | unknown protein                               |
| 5084 | 11.91 | 0.06 | 9.34  | 0.08 | 7.62  | 0.51 | 5.928 down | 19.550 down | 0.00 | 79.21  | conidiation-specific protein 10               |
| 5182 | 12.58 | 0.03 | 9.89  | 0.02 | 10.43 | 0.15 | 6.435 down | 4.438 down  | 0.00 | 311.80 | iron-dependent peroxidase                     |
| 5196 | 11.13 | 0.00 | 11.14 | 0.03 | 9.23  | 0.28 | 1.006 up   | 3.749 down  | 0.00 | 78.40  | C-type cyclin                                 |
| 5275 | 12.75 | 0.11 | 12.79 | 0.03 | 10.89 | 0.06 | 1.024 up   | 3.633 down  | 0.00 | 800.28 | unknown protein with SET domain               |
| 5296 | 10.85 | 0.09 | 10.83 | 0.03 | 9.75  | 0.03 | 1.019 down | 2.155 down  | 0.00 | 510.87 | DHQase_I. Type I 3-dehydroquinase             |
| 5308 | 5.13  | 0.34 | 5.20  | 0.68 | 6.49  | 0.42 | 1.050 up   | 2.558 up    | 0.04 | 7.82   | unknown protein                               |
| 5319 | 10.23 | 0.01 | 9.42  | 0.04 | 8.19  | 0.09 | 1.747 down | 4.094 down  | 0.00 | 585.84 | unknown protein                               |
| 5324 | 10.79 | 0.14 | 11.26 | 0.10 | 12.02 | 0.24 | 1.384 up   | 2.343 up    | 0.01 | 26.97  | Ribosomal protein L14b                        |
| 5330 | 4.77  | 0.01 | 4.76  | 0.25 | 5.91  | 0.25 | 1.011 down | 2.195 up    | 0.01 | 26.91  | glutathione S-transferase. putative           |
| 5366 | 11.28 | 0.01 | 11.29 | 0.01 | 9.92  | 0.63 | 1.008 up   | 2.555 down  | 0.04 | 7.87   | O-methyltransferase. putative                 |
| 5369 | 3.51  | 0.29 | 3.19  | 0.36 | 6.05  | 1.06 | 1.250 down | 5.811 up    | 0.03 | 10.22  | Metalloprotease. putative                     |
| 5530 | 12.84 | 0.14 | 12.11 | 0.14 | 11.36 | 0.21 | 1.651 down | 2.780 down  | 0.00 | 42.34  | unknown protein                               |
| 5612 | 9.58  | 0.08 | 8.56  | 0.04 | 8.06  | 0.40 | 2.028 down | 2.858 down  | 0.01 | 15.90  | MFS permease                                  |
| 5651 | 8.16  | 0.04 | 6.47  | 0.38 | 6.42  | 0.29 | 3.222 down | 3.328 down  | 0.01 | 27.94  | unknown protein                               |
| 5656 | 10.62 | 0.09 | 10.70 | 0.15 | 9.39  | 0.25 | 1.057 up   | 2.348 down  | 0.00 | 36.99  | MFS permease                                  |
| 5675 | 12.39 | 0.08 | 12.21 | 0.12 | 11.31 | 0.10 | 1.130 down | 2.106 down  | 0.00 | 98.52  | C2H2 transcriptional regulator                |
| 5737 | 10.10 | 0.02 | 10.30 | 0.01 | 8.96  | 0.18 | 1.148 up   | 2.194 down  | 0.00 | 78.72  | tyrosine/serine protein phosphatase. putative |
| 5776 | 13.87 | 0.02 | 12.85 | 0.02 | 12.56 | 0.18 | 2.029 down | 2.478 down  | 0.00 | 61.23  | glucose-6-phosphate isomerase                 |
| 5807 | 8.79  | 0.18 | 6.94  | 0.13 | 7.18  | 0.50 | 3.606 down | 3.055 down  | 0.02 | 13.68  | GH95 $\alpha$ -L-fucosidase                   |
| 5818 | 9.88  | 0.07 | 8.82  | 0.05 | 8.84  | 0.10 | 2.086 down | 2.049 down  | 0.00 | 117.46 | DSBA oxidoreductase                           |
| 5836 | 10.74 | 0.03 | 12.11 | 0.23 | 11.79 | 0.42 | 2.584 up   | 2.073 up    | 0.03 | 9.20   | GH2 $\beta$ -mannosidase                      |
| 5888 | 4.26  | 0.17 | 3.77  | 0.42 | 5.31  | 0.25 | 1.400 down | 2.069 up    | 0.01 | 22.83  | fatty-acid amide hydrolase. putative          |
| 5889 | 10.37 | 0.45 | 9.36  | 0.23 | 9.26  | 0.33 | 2.014 down | 2.156 down  | 0.04 | 7.69   | amidase                                       |
| 5890 | 4.07  | 0.13 | 3.83  | 0.26 | 5.61  | 0.06 | 1.177 down | 2.908 up    | 0.00 | 146.41 | MFS permease                                  |
| 5912 | 11.49 | 0.12 | 11.19 | 0.13 | 10.44 | 0.18 | 1.225 down | 2.059 down  | 0.00 | 34.11  | unknown protein                               |
| 5942 | 11.37 | 0.21 | 10.49 | 0.13 | 9.50  | 0.26 | 1.845 down | 3.665 down  | 0.00 | 46.16  | unknown protein                               |
| 5970 | 11.51 | 0.07 | 9.33  | 0.06 | 8.77  | 0.16 | 4.533 down | 6.710 down  | 0.00 | 286.94 | Amidase                                       |
| 6085 | 3.77  | 0.07 | 5.01  | 0.27 | 4.80  | 0.05 | 2.362 up   | 2.041 up    | 0.00 | 55.44  | Enoyl-CoA hydratase/isomerase. putative       |

|       |       |      |       |      |       |      |            |            |      |        |                                                        |
|-------|-------|------|-------|------|-------|------|------------|------------|------|--------|--------------------------------------------------------|
| 6103  | 3.80  | 0.02 | 4.04  | 0.32 | 4.94  | 0.11 | 1.179 up   | 2.196 up   | 0.00 | 37.99  | MFS multidrug transporter. putative                    |
| 21152 | 11.01 | 0.14 | 11.46 | 0.12 | 12.59 | 0.29 | 1.364 up   | 2.991 up   | 0.00 | 33.69  | unknown protein                                        |
| 21170 | 13.33 | 0.03 | 13.86 | 0.30 | 14.54 | 0.07 | 1.440 up   | 2.300 up   | 0.00 | 47.41  | Ribosomal protein S12                                  |
| 21221 | 11.39 | 0.17 | 11.45 | 0.21 | 10.36 | 0.08 | 1.044 up   | 2.038 down | 0.00 | 60.93  | unknown protein                                        |
| 21288 | 12.68 | 0.04 | 12.73 | 0.04 | 11.55 | 0.20 | 1.035 up   | 2.182 down | 0.00 | 53.68  | Vacuolar segregation protein Pep7                      |
| 21342 | 12.35 | 0.12 | 12.43 | 0.08 | 11.21 | 0.18 | 1.056 up   | 2.204 down | 0.00 | 61.79  | TUL1 Golgi-localized RING-finger ubiquitin ligase (E3) |
| 21396 | 11.40 | 0.03 | 10.81 | 0.04 | 10.22 | 0.16 | 1.497 down | 2.263 down | 0.00 | 61.24  | sugar isomerase                                        |
| 21412 | 13.97 | 0.17 | 12.89 | 0.11 | 12.97 | 0.12 | 2.118 down | 2.000 down | 0.00 | 50.22  | unknown protein                                        |
| 21415 | 12.60 | 0.19 | 11.61 | 0.08 | 10.46 | 0.25 | 1.989 down | 4.412 down | 0.00 | 71.00  | unknown protein                                        |
| 21416 | 13.17 | 0.08 | 12.41 | 0.03 | 11.47 | 0.13 | 1.698 down | 3.251 down | 0.00 | 165.59 | unknown protein                                        |
| 21422 | 12.80 | 0.02 | 12.78 | 0.03 | 11.15 | 0.08 | 1.013 down | 3.152 down | 0.00 | 594.42 | MFS permease                                           |
| 21461 | 12.27 | 0.07 | 11.92 | 0.15 | 11.27 | 0.25 | 1.270 down | 2.003 down | 0.01 | 17.47  | ATP-dependent protease La. putative                    |
| 21498 | 11.25 | 0.18 | 12.40 | 0.20 | 12.91 | 0.03 | 2.221 up   | 3.163 up   | 0.00 | 120.28 | unknown protein                                        |
| 21505 | 12.87 | 0.18 | 12.46 | 0.11 | 11.57 | 0.15 | 1.330 down | 2.467 down | 0.00 | 54.90  | G-protein alpha subunit 3 GNA-3                        |
| 21571 | 13.26 | 0.11 | 12.93 | 0.09 | 12.24 | 0.21 | 1.253 down | 2.019 down | 0.01 | 25.09  | unknown protein                                        |
| 21595 | 10.53 | 0.14 | 7.93  | 0.13 | 8.56  | 0.17 | 6.057 down | 3.914 down | 0.00 | 150.98 | MFS permease                                           |
| 21758 | 14.86 | 0.16 | 15.08 | 0.02 | 13.36 | 0.20 | 1.165 up   | 2.832 down | 0.00 | 92.43  | isocitrate lyase                                       |
| 21817 | 12.81 | 0.05 | 11.87 | 0.19 | 11.47 | 0.18 | 1.918 down | 2.520 down | 0.00 | 43.31  | unknown protein                                        |
| 21836 | 13.96 | 0.01 | 13.13 | 0.01 | 11.84 | 0.16 | 1.775 down | 4.346 down | 0.00 | 202.44 | phosphoglucomutase/phosphomannomutase                  |
| 21960 | 11.54 | 0.12 | 11.83 | 0.07 | 13.05 | 0.52 | 1.223 up   | 2.842 up   | 0.02 | 11.40  | phospholipase C                                        |
| 22030 | 12.46 | 0.02 | 12.51 | 0.09 | 11.17 | 0.14 | 1.033 up   | 2.442 down | 0.00 | 135.52 | unknown protein                                        |
| 22035 | 12.17 | 0.07 | 11.40 | 0.19 | 10.92 | 0.14 | 1.702 down | 2.376 down | 0.00 | 49.85  | unknown protein                                        |
| 22064 | 13.86 | 0.03 | 13.07 | 0.01 | 12.20 | 0.07 | 1.726 down | 3.163 down | 0.00 | 553.67 | DNAJ heat shock family protein                         |
| 22076 | 11.93 | 0.13 | 12.30 | 0.19 | 13.11 | 0.16 | 1.294 up   | 2.266 up   | 0.00 | 40.46  | lysine decarboxylase                                   |
| 22093 | 12.88 | 0.10 | 11.88 | 0.05 | 10.15 | 0.19 | 2.004 down | 6.633 down | 0.00 | 230.35 | Protein farnesyltransferase. alpha subunit             |
| 22129 | 10.92 | 0.02 | 12.68 | 0.01 | 12.59 | 0.68 | 3.396 up   | 3.195 up   | 0.04 | 7.90   | GH61 polysaccharide monoxygenase                       |
| 22168 | 10.72 | 0.12 | 9.71  | 0.14 | 9.61  | 0.25 | 2.016 down | 2.163 down | 0.01 | 19.84  | unknown protein                                        |
| 22201 | 11.38 | 0.02 | 11.09 | 0.29 | 9.94  | 0.28 | 1.223 down | 2.717 down | 0.01 | 26.99  | unknown protein                                        |
| 22251 | 10.55 | 0.04 | 10.81 | 0.01 | 12.58 | 0.27 | 1.199 up   | 4.105 up   | 0.00 | 84.11  | Mitochondrial carnitine-acylcarnitine carrier protein  |
| 22277 | 9.52  | 0.03 | 11.02 | 0.31 | 10.63 | 0.27 | 2.830 up   | 2.159 up   | 0.01 | 19.53  | sideroflexin-1                                         |

|       |       |      |       |      |       |      |            |            |      |        |                                            |
|-------|-------|------|-------|------|-------|------|------------|------------|------|--------|--------------------------------------------|
| 22283 | 13.00 | 0.24 | 12.76 | 0.10 | 11.91 | 0.39 | 1.179 down | 2.130 down | 0.03 | 9.31   | unknown protein                            |
| 22332 | 11.84 | 0.08 | 12.72 | 0.13 | 13.04 | 0.17 | 1.838 up   | 2.292 up   | 0.00 | 43.15  | small nuclear ribonucleoprotein E          |
| 22351 | 7.22  | 0.12 | 8.32  | 0.21 | 9.24  | 0.30 | 2.142 up   | 4.051 up   | 0.00 | 40.89  | legume-like lectin                         |
| 22386 | 12.03 | 0.16 | 12.13 | 0.08 | 14.74 | 0.11 | 1.066 up   | 6.519 up   | 0.00 | 520.33 | Epl1/Sm1                                   |
| 22388 | 11.31 | 0.04 | 11.39 | 0.04 | 10.28 | 0.19 | 1.051 up   | 2.048 down | 0.00 | 48.99  | unknown protein                            |
| 22426 | 11.61 | 0.01 | 11.09 | 0.16 | 10.30 | 0.11 | 1.434 down | 2.484 down | 0.00 | 97.28  | unknown protein                            |
| 22459 | 11.26 | 0.03 | 12.76 | 0.17 | 12.47 | 0.11 | 2.822 up   | 2.322 up   | 0.00 | 106.23 | carboxypeptidase A                         |
| 22464 | 12.04 | 0.16 | 11.48 | 0.06 | 9.07  | 0.15 | 1.475 down | 7.818 down | 0.00 | 385.49 | Bifunctional P-450:NADPH-P450 reductase    |
| 22512 | 8.85  | 0.04 | 10.54 | 0.16 | 11.74 | 0.18 | 3.243 up   | 7.442 up   | 0.00 | 221.40 | short chain dehydrogenase/reductase        |
| 22532 | 14.25 | 0.09 | 14.09 | 0.03 | 13.22 | 0.27 | 1.118 down | 2.049 down | 0.01 | 20.57  | BZIP transcriptional regulator             |
| 22559 | 13.28 | 0.01 | 12.81 | 0.09 | 12.16 | 0.24 | 1.385 down | 2.173 down | 0.01 | 24.45  | unknown protein                            |
| 22625 | 9.72  | 0.10 | 10.32 | 0.04 | 10.92 | 0.15 | 1.520 up   | 2.304 up   | 0.00 | 64.87  | Molecular chaperone (DnaJ superfamily)     |
| 22654 | 12.94 | 0.03 | 12.11 | 0.17 | 10.77 | 0.19 | 1.783 down | 4.500 down | 0.00 | 119.71 | monodehydroascorbate reductase             |
| 22667 | 9.38  | 0.13 | 9.93  | 0.21 | 10.51 | 0.07 | 1.465 up   | 2.189 up   | 0.00 | 57.21  | pre-rRNA-processing protein IPI1. putative |
| 22705 | 11.22 | 0.00 | 11.45 | 0.06 | 10.05 | 0.14 | 1.175 up   | 2.255 down | 0.00 | 141.99 | urease                                     |
| 22707 | 11.84 | 0.03 | 12.08 | 0.00 | 12.99 | 0.09 | 1.183 up   | 2.228 up   | 0.00 | 226.72 | unknown protein                            |
| 22718 | 12.11 | 0.20 | 12.57 | 0.01 | 13.13 | 0.05 | 1.375 up   | 2.028 up   | 0.00 | 79.01  | Glutaminylpeptide cyclotransferase         |
| 22741 | 10.19 | 0.17 | 9.78  | 0.14 | 8.85  | 0.40 | 1.330 down | 2.539 down | 0.02 | 13.17  | unknown protein                            |
| 22785 | 12.51 | 0.07 | 12.29 | 0.16 | 10.86 | 0.13 | 1.166 down | 3.150 down | 0.00 | 153.37 | C2H2 transcriptional regulator (amdA ?)    |
| 22830 | 11.16 | 0.04 | 10.51 | 0.06 | 9.64  | 0.04 | 1.569 down | 2.876 down | 0.00 | 893.43 | Glutathione S-transferase                  |
| 22841 | 10.29 | 0.13 | 10.40 | 0.15 | 11.65 | 0.34 | 1.082 up   | 2.560 up   | 0.01 | 22.40  | unknown protein                            |
| 22875 | 11.95 | 0.01 | 11.88 | 0.02 | 10.21 | 0.09 | 1.047 down | 3.346 down | 0.00 | 648.36 | unknown protein                            |
| 23059 | 12.83 | 0.65 | 13.38 | 0.17 | 14.35 | 0.18 | 1.461 up   | 2.879 up   | 0.01 | 15.66  | Ribosomal protein L24/L26                  |
| 23083 | 10.60 | 0.07 | 11.90 | 0.08 | 12.20 | 0.54 | 2.470 up   | 3.030 up   | 0.03 | 9.94   | Flavoprotein monooxygenase                 |
| 23115 | 10.04 | 0.06 | 9.14  | 0.22 | 11.80 | 0.38 | 1.866 down | 3.393 up   | 0.00 | 53.89  | expansin                                   |
| 23124 | 12.66 | 0.25 | 12.89 | 0.13 | 11.55 | 0.17 | 1.169 up   | 2.158 down | 0.00 | 47.20  | unknown protein                            |
| 23146 | 11.72 | 0.00 | 11.73 | 0.01 | 13.04 | 0.20 | 1.007 up   | 2.499 up   | 0.00 | 72.73  | unknown protein                            |
| 23152 | 10.85 | 0.00 | 10.66 | 0.02 | 9.75  | 0.21 | 1.145 down | 2.143 down | 0.00 | 40.13  | unknown LMBR1 domain protein               |
| 23171 | 10.52 | 0.24 | 12.38 | 0.07 | 13.83 | 0.21 | 3.634 up   | 9.894 up   | 0.00 | 191.65 | NRPS                                       |
| 23193 | 12.20 | 0.02 | 11.71 | 0.13 | 13.41 | 0.17 | 1.403 down | 2.313 up   | 0.00 | 110.62 | importin $\beta$ KapJ                      |

|       |       |      |       |      |       |      |            |             |      |        |                                                                     |
|-------|-------|------|-------|------|-------|------|------------|-------------|------|--------|---------------------------------------------------------------------|
| 23271 | 12.72 | 0.00 | 13.21 | 0.08 | 14.16 | 0.15 | 1.398 up   | 2.713 up    | 0.00 | 105.35 | ER-derived vesicles protein Erv41                                   |
| 23462 | 11.90 | 0.05 | 11.22 | 0.12 | 10.57 | 0.19 | 1.605 down | 2.515 down  | 0.00 | 46.94  | unknown protein                                                     |
| 23475 | 13.71 | 0.01 | 13.03 | 0.09 | 12.61 | 0.04 | 1.594 down | 2.142 down  | 0.00 | 306.64 | Peptidase family M28 protein                                        |
| 24586 | 4.43  | 0.40 | 4.74  | 0.08 | 5.89  | 0.40 | 1.236 up   | 2.736 up    | 0.02 | 13.45  | NRPS                                                                |
| 25159 | 13.46 | 0.07 | 12.51 | 0.12 | 12.41 | 0.10 | 1.924 down | 2.060 down  | 0.00 | 75.53  | PTPc. Protein tyrosine phosphatases (PTP)                           |
| 25739 | 12.09 | 0.10 | 11.93 | 0.02 | 10.89 | 0.10 | 1.120 down | 2.296 down  | 0.00 | 149.52 | CorA family metal ion transporter [Metarhizium anisopliae ARSEF 23] |
| 26187 | 3.23  | 0.03 | 3.08  | 0.01 | 5.63  | 0.16 | 1.113 down | 5.270 up    | 0.00 | 392.37 | unknown protein                                                     |
| 26255 | 8.74  | 0.01 | 8.55  | 0.12 | 7.47  | 0.42 | 1.141 down | 2.413 down  | 0.02 | 12.86  | Zn2Cys6 transcriptional regulator                                   |
| 26642 | 11.03 | 0.16 | 9.61  | 0.09 | 9.31  | 0.48 | 2.673 down | 3.309 down  | 0.02 | 13.85  | MFS permease                                                        |
| 26787 | 11.81 | 0.04 | 11.87 | 0.31 | 10.76 | 0.32 | 1.036 up   | 2.073 down  | 0.02 | 14.26  | ADP-ribosylation factor-binding protein Gga2                        |
| 26871 | 10.34 | 0.02 | 9.90  | 0.04 | 9.33  | 0.29 | 1.361 down | 2.021 down  | 0.02 | 14.61  | Zn2Cys6 transcriptional regulator                                   |
| 27042 | 10.63 | 0.02 | 9.74  | 0.10 | 9.50  | 0.17 | 1.852 down | 2.192 down  | 0.00 | 45.57  | unknown protein                                                     |
| 27181 | 13.84 | 0.08 | 12.39 | 0.04 | 9.65  | 0.59 | 2.740 down | 18.345 down | 0.00 | 62.51  | MFS permease                                                        |
| 27219 | 3.82  | 0.46 | 4.79  | 0.01 | 5.25  | 0.11 | 1.966 up   | 2.694 up    | 0.01 | 27.28  | GH27 $\alpha$ -galactosidase                                        |
| 27422 | 5.33  | 0.09 | 6.43  | 0.15 | 6.40  | 0.18 | 2.149 up   | 2.109 up    | 0.00 | 35.03  | RNA helicase DEAD/DEAH box                                          |
| 27697 | 8.96  | 0.01 | 9.13  | 0.03 | 7.37  | 0.38 | 1.122 up   | 3.020 down  | 0.00 | 32.84  | Amidase                                                             |
| 27770 | 10.59 | 0.03 | 11.12 | 0.02 | 7.86  | 0.41 | 1.439 up   | 6.637 down  | 0.00 | 90.90  | MFS permease                                                        |
| 27939 | 10.61 | 0.02 | 10.75 | 0.02 | 8.99  | 0.22 | 1.098 up   | 3.071 down  | 0.00 | 96.69  | unknown protein                                                     |
| 27983 | 3.59  | 0.09 | 3.24  | 0.25 | 5.32  | 0.50 | 1.272 down | 3.331 up    | 0.01 | 22.77  | PTH11 GPCR                                                          |
| 27992 | 10.75 | 0.02 | 12.75 | 0.07 | 12.44 | 0.06 | 4.000 up   | 3.240 up    | 0.00 | 713.53 | PTH11 GPCR                                                          |
| 28036 | 8.49  | 0.09 | 6.27  | 0.35 | 6.63  | 0.10 | 4.652 down | 3.610 down  | 0.00 | 95.29  | MFS permease                                                        |
| 29275 | 6.62  | 0.29 | 7.00  | 0.01 | 8.31  | 0.08 | 1.297 up   | 3.219 up    | 0.00 | 112.54 | unknown protein                                                     |
| 29439 | 10.95 | 0.03 | 10.09 | 0.01 | 9.73  | 0.25 | 1.808 down | 2.325 down  | 0.01 | 25.79  | unknown protein                                                     |
| 29642 | 3.90  | 0.20 | 4.46  | 0.17 | 5.90  | 0.36 | 1.468 up   | 3.998 up    | 0.00 | 34.58  | Phosphatidylserine decarboxylase                                    |
| 29710 | 10.58 | 0.30 | 10.13 | 0.21 | 8.79  | 0.12 | 1.362 down | 3.454 down  | 0.00 | 72.03  | unknown protein                                                     |
| 29993 | 10.37 | 0.11 | 9.77  | 0.11 | 8.58  | 0.15 | 1.516 down | 3.465 down  | 0.00 | 135.07 | unknown protein                                                     |
| 30084 | 7.89  | 0.03 | 9.33  | 0.18 | 9.10  | 0.20 | 2.706 up   | 2.313 up    | 0.00 | 40.89  | unknown protein                                                     |
| 30166 | 10.42 | 0.18 | 9.65  | 0.07 | 7.66  | 0.21 | 1.698 down | 6.766 down  | 0.00 | 171.73 | unknown protein                                                     |
| 30274 | 8.21  | 0.35 | 8.41  | 0.22 | 9.85  | 0.33 | 1.148 up   | 3.126 up    | 0.01 | 24.33  | unknown protein                                                     |
| 30465 | 3.67  | 0.05 | 3.03  | 0.21 | 5.06  | 0.23 | 1.557 down | 2.611 up    | 0.00 | 78.07  | unknown protein. WD-repeats                                         |

|       |       |      |       |      |       |      |            |            |      |        |                                                                   |
|-------|-------|------|-------|------|-------|------|------------|------------|------|--------|-------------------------------------------------------------------|
| 30578 | 9.20  | 0.05 | 8.57  | 0.06 | 7.03  | 0.26 | 1.547 down | 4.472 down | 0.00 | 85.87  | HhH-GPD family base excision DNA repair protein                   |
| 30759 | 10.11 | 0.07 | 9.19  | 0.04 | 8.70  | 0.53 | 1.892 down | 2.654 down | 0.04 | 7.88   | zinc containing alcohol dehydrogenase superfamily                 |
| 30776 | 3.14  | 0.04 | 3.19  | 0.02 | 4.33  | 0.07 | 1.036 up   | 2.281 up   | 0.00 | 424.55 | alpha-ketoglutarate-dependent sulfonate diunknown proteingenase   |
| 31134 | 12.64 | 0.16 | 12.48 | 0.05 | 9.83  | 0.16 | 1.116 down | 7.005 down | 0.00 | 363.54 | isoprenylcysteine carboxyl methyltransferase                      |
| 31210 | 11.81 | 0.20 | 11.86 | 0.01 | 9.69  | 0.24 | 1.033 up   | 4.325 down | 0.00 | 103.75 | unknown protein                                                   |
| 31248 | 12.02 | 0.17 | 11.60 | 0.03 | 10.35 | 0.10 | 1.341 down | 3.187 down | 0.00 | 183.47 | Ribonuclease. T2 family                                           |
| 31367 | 11.81 | 0.05 | 11.60 | 0.01 | 10.61 | 0.24 | 1.156 down | 2.285 down | 0.00 | 34.13  | unknown protein                                                   |
| 31447 | 4.70  | 0.12 | 5.60  | 0.09 | 6.22  | 0.23 | 1.867 up   | 2.863 up   | 0.00 | 42.40  | unknown protein                                                   |
| 31481 | 9.29  | 0.08 | 10.55 | 0.01 | 10.35 | 0.09 | 2.395 up   | 2.074 up   | 0.00 | 163.52 | chaperone protein dnaJ 6                                          |
| 32087 | 5.26  | 0.52 | 5.69  | 0.05 | 7.28  | 0.51 | 1.346 up   | 4.040 up   | 0.01 | 15.86  | short chain dehydrogenase/reductase                               |
| 32212 | 2.69  | 0.23 | 2.47  | 0.35 | 4.08  | 0.05 | 1.166 down | 2.618 up   | 0.00 | 63.62  | SSCRP                                                             |
| 32243 | 11.55 | 0.17 | 11.04 | 0.25 | 9.94  | 0.55 | 1.428 down | 3.056 down | 0.03 | 9.85   | Alpha/beta hydrolase                                              |
| 32261 | 12.43 | 0.11 | 11.56 | 0.12 | 11.01 | 0.32 | 1.832 down | 2.678 down | 0.01 | 20.83  | unknown protein                                                   |
| 32364 | 12.01 | 0.05 | 11.34 | 0.07 | 9.30  | 0.36 | 1.586 down | 6.507 down | 0.00 | 72.82  | GDSL lipase                                                       |
| 32402 | 2.80  | 0.15 | 2.79  | 0.22 | 4.48  | 0.08 | 1.009 down | 3.214 up   | 0.00 | 154.54 | glutathione S-transferase GliG. putative                          |
| 32478 | 3.09  | 0.05 | 3.22  | 0.01 | 4.80  | 0.25 | 1.093 up   | 3.281 up   | 0.00 | 72.21  | unknown protein                                                   |
| 32639 | 5.29  | 0.29 | 5.84  | 0.25 | 7.57  | 0.95 | 1.471 up   | 4.886 up   | 0.05 | 7.36   | unknown protein                                                   |
| 32747 | 3.38  | 0.04 | 3.89  | 0.49 | 4.90  | 0.08 | 1.420 up   | 2.856 up   | 0.00 | 32.83  | unknown protein                                                   |
| 32798 | 12.43 | 0.04 | 12.70 | 0.14 | 14.92 | 0.08 | 1.207 up   | 5.624 up   | 0.00 | 659.82 | unknown protein                                                   |
| 32849 | 11.61 | 0.02 | 11.06 | 0.15 | 10.24 | 0.17 | 1.465 down | 2.581 down | 0.00 | 63.16  | unknown protein                                                   |
| 33029 | 7.88  | 0.41 | 7.88  | 0.03 | 10.07 | 0.83 | 1.001 up   | 4.594 up   | 0.02 | 10.76  | unknown protein                                                   |
| 33058 | 9.03  | 0.05 | 10.14 | 0.27 | 10.35 | 0.35 | 2.148 up   | 2.491 up   | 0.02 | 13.13  | unknown protein                                                   |
| 33207 | 10.47 | 0.09 | 10.67 | 0.07 | 9.32  | 0.18 | 1.147 up   | 2.231 down | 0.00 | 72.10  | cation transport protein ChaC. putative                           |
| 33342 | 9.37  | 0.13 | 9.91  | 0.17 | 12.29 | 0.10 | 1.461 up   | 7.618 up   | 0.00 | 488.74 | Oligosaccharyltransferase. epsilon subunit                        |
| 33359 | 10.04 | 0.17 | 10.85 | 0.20 | 12.06 | 0.51 | 1.743 up   | 4.041 up   | 0.01 | 17.30  | translation initiation factor SUI1 and density-regulated protein. |
| 33371 | 4.62  | 0.07 | 4.73  | 0.18 | 5.98  | 0.47 | 1.078 up   | 2.569 up   | 0.02 | 12.14  | phosphoglycerate mutase family protein                            |
| 33387 | 12.86 | 0.03 | 12.36 | 0.05 | 11.04 | 0.32 | 1.411 down | 3.518 down | 0.00 | 41.94  | GCN5-related N-acetyltransferase. putative                        |
| 33723 | 4.77  | 0.32 | 5.75  | 0.18 | 6.27  | 0.45 | 1.977 up   | 2.839 up   | 0.03 | 10.28  | ankyrin repeat-containing protein. putative                       |
| 33949 | 4.97  | 0.36 | 5.20  | 0.10 | 6.31  | 0.19 | 1.178 up   | 2.535 up   | 0.00 | 31.05  | NADH:cytochrome b5 reductase (CBR). putative                      |
| 33960 | 12.26 | 0.17 | 12.87 | 0.26 | 13.60 | 0.24 | 1.529 up   | 2.528 up   | 0.01 | 23.26  | prefoldin subunit 6. putative                                     |



|       |       |      |       |      |       |      |            |            |      |        |                                                                 |
|-------|-------|------|-------|------|-------|------|------------|------------|------|--------|-----------------------------------------------------------------|
| 34183 | 8.03  | 0.18 | 8.59  | 0.12 | 9.05  | 0.38 | 1.467 up   | 2.019 up   | 0.05 | 7.22   | unknown protein                                                 |
| 34197 | 11.81 | 0.14 | 11.98 | 0.07 | 10.28 | 0.09 | 1.125 up   | 2.879 down | 0.00 | 259.52 | BolA-like protein                                               |
| 34252 | 13.07 | 0.11 | 12.27 | 0.04 | 10.55 | 0.16 | 1.742 down | 5.722 down | 0.00 | 260.43 | unknown protein                                                 |
| 34280 | 10.49 | 0.04 | 11.50 | 0.13 | 11.52 | 0.34 | 2.015 up   | 2.031 up   | 0.03 | 10.46  | unknown protein                                                 |
| 34312 | 4.12  | 0.03 | 4.42  | 0.24 | 6.78  | 0.34 | 1.230 up   | 6.305 up   | 0.00 | 78.81  | conidiation protein 6                                           |
| 34327 | 11.56 | 0.06 | 12.33 | 0.14 | 12.66 | 0.25 | 1.702 up   | 2.138 up   | 0.01 | 18.78  | NADH-ubiquinone oxidoreductase B12 subunit. putative            |
| 34413 | 5.09  | 0.44 | 5.85  | 0.66 | 8.10  | 0.59 | 1.686 up   | 8.071 up   | 0.01 | 21.48  | unique protein. secreted                                        |
| 34493 | 14.80 | 0.13 | 14.87 | 0.15 | 11.84 | 0.23 | 1.048 up   | 7.778 down | 0.00 | 219.01 | a-type peptide pheromone precursor hpp1                         |
| 34726 | 4.50  | 0.23 | 5.48  | 0.01 | 5.92  | 0.09 | 1.973 up   | 2.671 up   | 0.00 | 82.70  | Guanine nucleotide exchange factor for Ras-likeGTPases (RasGEF) |
| 35109 | 3.67  | 0.12 | 3.05  | 0.17 | 7.77  | 0.74 | 1.535 down | 17.094 up  | 0.00 | 57.40  | unknown protein. contains WD repeats                            |
| 35137 | 3.77  | 0.32 | 3.26  | 0.05 | 4.93  | 0.20 | 1.427 down | 2.234 up   | 0.00 | 46.93  | unknown protein                                                 |
| 35534 | 5.06  | 0.27 | 5.48  | 0.41 | 6.25  | 0.20 | 1.338 up   | 2.277 up   | 0.02 | 14.30  | unknown protein                                                 |
| 35726 | 4.52  | 0.09 | 4.68  | 0.14 | 5.99  | 0.23 | 1.121 up   | 2.775 up   | 0.00 | 50.94  | Subtilisin like protease                                        |
| 35777 | 13.64 | 0.03 | 13.19 | 0.06 | 12.38 | 0.31 | 1.359 down | 2.383 down | 0.01 | 20.49  | K(+)/H(+) antiporter 1                                          |
| 36006 | 12.77 | 0.10 | 12.10 | 0.24 | 11.38 | 0.15 | 1.591 down | 2.621 down | 0.00 | 48.86  | Serine/Threonine protein kinase                                 |
| 36159 | 10.53 | 0.11 | 10.26 | 0.10 | 9.37  | 0.15 | 1.202 down | 2.237 down | 0.00 | 58.27  | unknown protein                                                 |
| 36335 | 10.29 | 0.02 | 10.74 | 0.11 | 7.33  | 0.60 | 1.362 up   | 7.762 down | 0.00 | 47.37  | Zn2Cys6 transcriptional regulator                               |
| 36468 | 11.21 | 0.07 | 10.31 | 0.03 | 9.22  | 0.26 | 1.872 down | 3.992 down | 0.00 | 64.80  | Zn2Cys6 transcriptional regulator                               |
| 36530 | 10.15 | 0.11 | 10.03 | 0.08 | 8.99  | 0.26 | 1.084 down | 2.227 down | 0.01 | 26.71  | unknown protein                                                 |
| 36608 | 10.78 | 0.01 | 11.51 | 0.14 | 9.67  | 0.20 | 1.657 up   | 2.149 down | 0.00 | 83.69  | unknown protein                                                 |
| 36703 | 10.56 | 0.02 | 10.15 | 0.17 | 9.20  | 0.32 | 1.326 down | 2.569 down | 0.01 | 21.38  | Zn2Cys6 transcriptional regulator                               |
| 36913 | 7.61  | 0.21 | 8.22  | 0.08 | 6.53  | 0.35 | 1.525 up   | 2.103 down | 0.01 | 24.52  | Zn2Cys6 transcriptional regulator                               |
| 37316 | 3.48  | 0.27 | 3.46  | 0.09 | 5.23  | 0.08 | 1.014 down | 3.350 up   | 0.00 | 148.72 | unknown protein                                                 |
| 37525 | 10.94 | 0.01 | 13.30 | 0.00 | 12.93 | 0.08 | 5.125 up   | 3.989 up   | 0.00 | 950.42 | GPCR . contains RGS domain                                      |
| 37783 | 11.84 | 0.14 | 9.91  | 0.07 | 8.85  | 0.47 | 3.819 down | 7.917 down | 0.00 | 42.63  | unknown protein                                                 |
| 37950 | 2.71  | 0.06 | 2.98  | 0.31 | 4.93  | 0.07 | 1.199 up   | 4.659 up   | 0.00 | 188.34 | unknown protein                                                 |
| 38048 | 9.31  | 0.05 | 9.83  | 0.13 | 7.98  | 0.34 | 1.436 up   | 2.503 down | 0.00 | 36.14  | unknown protein                                                 |
| 38080 | 12.06 | 0.15 | 12.08 | 0.00 | 10.74 | 0.21 | 1.013 up   | 2.511 down | 0.00 | 57.90  | C2H2 transcriptional regulator                                  |
| 38603 | 11.37 | 0.03 | 11.59 | 0.08 | 10.11 | 0.20 | 1.162 up   | 2.404 down | 0.00 | 73.87  | MFS permease                                                    |
| 38640 | 12.93 | 0.03 | 13.01 | 0.12 | 11.64 | 0.27 | 1.062 up   | 2.448 down | 0.00 | 37.03  | unknown protein                                                 |

|       |       |      |       |      |       |      |              |            |      |        |                                                                                |
|-------|-------|------|-------|------|-------|------|--------------|------------|------|--------|--------------------------------------------------------------------------------|
| 38833 | 11.96 | 0.05 | 11.25 | 0.05 | 10.28 | 0.29 | 1.641 down   | 3.197 down | 0.00 | 38.74  | unknown protein                                                                |
| 38863 | 11.04 | 0.02 | 10.71 | 0.12 | 9.97  | 0.08 | 1.257 down   | 2.096 down | 0.00 | 127.44 | unknown protein                                                                |
| 39221 | 8.88  | 0.07 | 8.92  | 0.01 | 7.78  | 0.54 | 1.032 up     | 2.130 down | 0.05 | 7.11   | Zn2Cys6 transcriptional regulator                                              |
| 39590 | 8.89  | 0.10 | 9.33  | 0.03 | 10.62 | 0.25 | 1.352 up     | 3.305 up   | 0.00 | 60.38  | Membrane protein Erj5 with DnaJ domain                                         |
| 39606 | 10.26 | 0.28 | 9.65  | 0.21 | 9.02  | 0.34 | 1.531 down   | 2.360 down | 0.02 | 11.04  | unknown protein                                                                |
| 39755 | 11.04 | 0.13 | 10.17 | 0.04 | 9.56  | 0.35 | 1.818 down   | 2.781 down | 0.01 | 19.09  | GH16 glucan endo-1.3(4)- $\beta$ -D-glucosidase                                |
| 40290 | 8.98  | 0.12 | 9.34  | 0.19 | 10.29 | 0.35 | 1.281 up     | 2.479 up   | 0.01 | 15.93  | unknown protein                                                                |
| 40346 | 10.31 | 0.16 | 11.29 | 0.03 | 11.51 | 0.27 | 1.959 up     | 2.292 up   | 0.01 | 19.65  | formamidopyrimidine-DNA glycosylase                                            |
| 40775 | 11.18 | 0.01 | 9.90  | 0.07 | 9.72  | 0.17 | 2.429 down   | 2.752 down | 0.00 | 79.10  | RTA1 protein. 7 TNM. responds to xenobiotic stimulus                           |
| 40808 | 5.85  | 0.37 | 9.25  | 0.13 | 4.52  | 0.14 | 10.571 up    | 2.515 down | 0.00 | 360.37 | short-chain dehydrogenase/reductase                                            |
| 40943 | 11.97 | 0.09 | 11.70 | 0.06 | 10.15 | 0.30 | 1.207 down   | 3.540 down | 0.00 | 52.12  | unknown protein                                                                |
| 41001 | 7.83  | 0.10 | 8.01  | 0.16 | 9.03  | 0.29 | 1.137 up     | 2.303 up   | 0.01 | 21.33  | unknown protein with Nif domain                                                |
| 41171 | 10.29 | 0.24 | 10.00 | 0.01 | 8.18  | 0.40 | 1.220 down   | 4.325 down | 0.00 | 36.03  | unknown protein                                                                |
| 41260 | 3.05  | 0.10 | 3.14  | 0.08 | 4.52  | 0.12 | 1.057 up     | 2.770 up   | 0.00 | 173.50 | PTH11 GPCR                                                                     |
| 41325 | 7.93  | 0.16 | 8.63  | 0.05 | 6.86  | 0.35 | 1.625 up     | 2.104 down | 0.00 | 28.80  | RTA1 like protein; 7 TM                                                        |
| 41425 | 8.87  | 0.09 | 8.75  | 0.14 | 7.08  | 0.37 | 1.086 down   | 3.458 down | 0.00 | 34.34  | unknown protein                                                                |
| 41428 | 13.26 | 0.01 | 13.22 | 0.09 | 11.97 | 0.26 | 1.027 down   | 2.445 down | 0.00 | 37.50  | Tyrosine specific protein phosphatase and dual specificity protein phosphatase |
| 41504 | 9.95  | 0.06 | 10.03 | 0.07 | 11.04 | 0.20 | 1.054 up     | 2.124 up   | 0.00 | 44.04  | phosphopantetheinyl transferase. putative                                      |
| 41573 | 13.52 | 0.14 | 13.15 | 0.02 | 12.46 | 0.31 | 1.293 down   | 2.085 down | 0.02 | 13.70  | BZIP transcriptional regulator                                                 |
| 41590 | 11.48 | 0.18 | 10.46 | 0.05 | 9.66  | 0.31 | 2.028 down   | 3.551 down | 0.00 | 35.28  | iron transporter                                                               |
| 41617 | 11.82 | 0.06 | 3.28  | 0.04 | 14.25 | 0.38 | 372.860 down | 5.394 up   | 0.00 | 928.13 | lae1                                                                           |
| 41699 | 6.56  | 0.05 | 7.81  | 0.06 | 8.35  | 0.40 | 2.380 up     | 3.449 up   | 0.01 | 21.86  | HET protein                                                                    |
| 41761 | 13.74 | 0.14 | 13.63 | 0.15 | 12.60 | 0.20 | 1.077 down   | 2.205 down | 0.00 | 37.38  | iron transporter                                                               |
| 41768 | 6.05  | 0.27 | 6.28  | 0.16 | 7.87  | 0.65 | 1.172 up     | 3.543 up   | 0.03 | 10.68  | GH16 cell wall glucanosyltransferase                                           |
| 41942 | 10.25 | 0.17 | 11.08 | 0.15 | 9.14  | 0.18 | 1.770 up     | 2.165 down | 0.00 | 92.84  | unknown protein                                                                |
| 42043 | 2.67  | 0.13 | 2.75  | 0.06 | 4.48  | 0.16 | 1.059 up     | 3.502 up   | 0.00 | 163.43 | unknown protein                                                                |
| 42152 | 8.71  | 0.03 | 8.13  | 0.05 | 6.34  | 0.24 | 1.491 down   | 5.173 down | 0.00 | 132.06 | GH75 chitosanase                                                               |
| 42181 | 9.67  | 0.13 | 9.90  | 0.02 | 10.99 | 0.35 | 1.175 up     | 2.499 up   | 0.01 | 18.87  | unknown protein                                                                |
| 42264 | 9.50  | 0.13 | 10.25 | 0.19 | 6.36  | 0.45 | 1.681 up     | 8.807 down | 0.00 | 97.08  | 3'-5' exonuclease                                                              |
| 42326 | 11.68 | 0.10 | 12.17 | 0.02 | 10.64 | 0.42 | 1.404 up     | 2.046 down | 0.01 | 16.18  | unknown protein                                                                |

|       |       |      |       |      |       |      |            |             |      |        |                                                       |
|-------|-------|------|-------|------|-------|------|------------|-------------|------|--------|-------------------------------------------------------|
| 42355 | 9.31  | 0.05 | 9.83  | 0.13 | 8.20  | 0.21 | 1.434 up   | 2.154 down  | 0.00 | 69.25  | unknown protein                                       |
| 42449 | 5.86  | 0.14 | 6.26  | 0.13 | 7.29  | 0.36 | 1.313 up   | 2.689 up    | 0.01 | 19.17  | N-acetyltransferase activity                          |
| 42571 | 6.46  | 0.02 | 6.20  | 0.08 | 7.51  | 0.27 | 1.196 down | 2.069 up    | 0.00 | 32.21  | unknown protein                                       |
| 42848 | 14.26 | 0.06 | 12.98 | 0.04 | 12.91 | 0.31 | 2.421 down | 2.534 down  | 0.01 | 22.53  | unknown protein                                       |
| 42866 | 12.18 | 0.05 | 10.63 | 0.11 | 10.57 | 0.25 | 2.932 down | 3.059 down  | 0.00 | 45.77  | thioesterase family protein                           |
| 42919 | 13.57 | 0.01 | 13.88 | 0.04 | 14.71 | 0.12 | 1.237 up   | 2.199 up    | 0.00 | 118.71 | ubiquitin fusion protein                              |
| 42942 | 2.23  | 0.02 | 2.11  | 0.05 | 3.71  | 0.10 | 1.087 down | 2.798 up    | 0.00 | 338.13 | unknown protein                                       |
| 43076 | 12.32 | 0.08 | 12.41 | 0.03 | 10.92 | 0.32 | 1.070 up   | 2.626 down  | 0.00 | 33.19  | unknown protein                                       |
| 43083 | 10.26 | 0.14 | 9.95  | 0.15 | 11.94 | 0.43 | 1.236 down | 3.216 up    | 0.00 | 29.07  | unknown protein                                       |
| 43115 | 9.52  | 0.01 | 11.05 | 0.12 | 10.65 | 0.14 | 2.885 up   | 2.190 up    | 0.00 | 88.85  | SSCRP                                                 |
| 43161 | 8.68  | 0.13 | 9.13  | 0.08 | 10.36 | 0.32 | 1.364 up   | 3.214 up    | 0.00 | 33.29  | Carboxylesterase and related proteins                 |
| 43199 | 4.03  | 0.12 | 4.55  | 0.35 | 5.95  | 0.18 | 1.442 up   | 3.792 up    | 0.00 | 61.63  | unknown protein                                       |
| 43225 | 11.51 | 0.14 | 12.52 | 0.20 | 13.24 | 0.18 | 2.007 up   | 3.317 up    | 0.00 | 65.31  | U6 small nuclear ribonucleoprotein (Lsm3). putative   |
| 43236 | 12.29 | 0.14 | 12.83 | 0.09 | 13.40 | 0.21 | 1.449 up   | 2.153 up    | 0.01 | 25.68  | unknown protein                                       |
| 43269 | 9.43  | 0.27 | 11.10 | 0.33 | 10.88 | 0.37 | 3.176 up   | 2.723 up    | 0.01 | 14.82  | bHLH transcriptional regulator                        |
| 43302 | 3.68  | 0.37 | 3.67  | 0.17 | 6.12  | 0.43 | 1.007 down | 5.446 up    | 0.00 | 42.46  | unknown protein                                       |
| 43392 | 5.42  | 0.08 | 6.15  | 0.25 | 7.97  | 0.55 | 1.651 up   | 5.859 up    | 0.01 | 26.27  | unique protein                                        |
| 43401 | 8.59  | 0.30 | 9.06  | 0.33 | 12.84 | 0.23 | 1.387 up   | 19.063 up   | 0.00 | 229.96 | unknown protein                                       |
| 43427 | 2.69  | 0.17 | 2.94  | 0.07 | 4.25  | 0.18 | 1.188 up   | 2.936 up    | 0.00 | 77.73  | unknown protein                                       |
| 43701 | 7.86  | 0.08 | 8.85  | 0.09 | 10.05 | 0.36 | 1.993 up   | 4.588 up    | 0.00 | 41.84  | MFS multidrug transporter                             |
| 43893 | 12.80 | 0.21 | 12.25 | 0.15 | 11.56 | 0.10 | 1.466 down | 2.366 down  | 0.00 | 56.48  | unknown protein                                       |
| 43974 | 10.19 | 0.05 | 10.87 | 0.21 | 11.31 | 0.26 | 1.608 up   | 2.180 up    | 0.01 | 16.78  | UDP-galactose transporter                             |
| 44117 | 13.34 | 0.15 | 12.83 | 0.10 | 12.00 | 0.07 | 1.424 down | 2.529 down  | 0.00 | 145.01 | Heterokaryon incompatibility protein HEC-C            |
| 44175 | 13.28 | 0.05 | 10.77 | 0.02 | 9.83  | 0.13 | 5.701 down | 10.981 down | 0.00 | 769.90 | MFS H <sup>+</sup> sugar transporter                  |
| 44251 | 9.96  | 0.05 | 9.85  | 0.10 | 11.30 | 0.28 | 1.078 down | 2.544 up    | 0.00 | 39.80  | GTPase-activating protein Msb3 (Sec4/Rab5)            |
| 44278 | 15.15 | 0.02 | 13.74 | 0.04 | 12.88 | 0.20 | 2.647 down | 4.813 down  | 0.00 | 140.75 | Rab geranyl transferase escort protein                |
| 44362 | 9.48  | 0.01 | 12.44 | 0.06 | 12.54 | 0.12 | 7.751 up   | 8.294 up    | 0.00 | 779.09 | unknown protein                                       |
| 44366 | 9.94  | 0.00 | 8.74  | 0.03 | 8.82  | 0.29 | 2.297 down | 2.179 down  | 0.01 | 19.55  | Glycosylphosphatidylinositol-specific phospholipase C |
| 44459 | 10.42 | 0.09 | 11.47 | 0.02 | 12.13 | 0.14 | 2.076 up   | 3.266 up    | 0.00 | 143.38 | Rfc4p (replication factor C) subunit 4                |
| 44476 | 11.26 | 0.00 | 8.94  | 0.05 | 9.68  | 0.40 | 4.980 down | 2.986 down  | 0.00 | 30.16  | MRP-type ABC transporter                              |

|       |       |      |       |      |       |      |            |             |      |        |                                                          |
|-------|-------|------|-------|------|-------|------|------------|-------------|------|--------|----------------------------------------------------------|
| 44640 | 12.15 | 0.16 | 13.24 | 0.01 | 13.55 | 0.06 | 2.128 up   | 2.630 up    | 0.00 | 191.12 | unknown protein                                          |
| 44878 | 12.56 | 0.08 | 12.19 | 0.05 | 11.29 | 0.18 | 1.298 down | 2.413 down  | 0.00 | 59.01  | unknown protein                                          |
| 45250 | 11.95 | 0.01 | 12.52 | 0.01 | 14.00 | 0.13 | 1.483 up   | 4.138 up    | 0.00 | 335.30 | oleate-delta12-desaturase                                |
| 45512 | 10.58 | 0.03 | 10.97 | 0.21 | 11.72 | 0.30 | 1.314 up   | 2.214 up    | 0.01 | 15.24  | unknown protein                                          |
| 45573 | 11.23 | 0.08 | 11.64 | 0.03 | 12.32 | 0.09 | 1.329 up   | 2.118 up    | 0.00 | 128.61 | PTH11 GPCR                                               |
| 45598 | 13.30 | 0.36 | 12.26 | 0.04 | 12.30 | 0.24 | 2.064 down | 2.003 down  | 0.02 | 12.83  | unknown protein                                          |
| 45675 | 12.45 | 0.02 | 11.88 | 0.09 | 10.71 | 0.14 | 1.482 down | 3.326 down  | 0.00 | 164.98 | unknown protein                                          |
| 45717 | 13.08 | 0.13 | 10.91 | 0.08 | 10.92 | 0.27 | 4.496 down | 4.485 down  | 0.00 | 75.32  | GH47 $\alpha$ -1.2-mannosidase                           |
| 46057 | 11.12 | 0.13 | 11.27 | 0.09 | 12.12 | 0.19 | 1.111 up   | 2.011 up    | 0.00 | 33.62  | unknown protein                                          |
| 46128 | 8.24  | 0.15 | 6.81  | 0.08 | 7.16  | 0.30 | 2.682 down | 2.114 down  | 0.01 | 19.61  | AAA ATPase                                               |
| 46320 | 11.98 | 0.13 | 12.50 | 0.21 | 13.09 | 0.17 | 1.441 up   | 2.162 up    | 0.00 | 29.50  | small nuclear ribonucleoprotein LSM2                     |
| 46443 | 10.34 | 0.00 | 11.04 | 0.11 | 9.05  | 0.38 | 1.623 up   | 2.437 down  | 0.00 | 31.96  | GT $\alpha$ -1.6-mannosyltransferase                     |
| 46446 | 12.63 | 0.09 | 12.41 | 0.01 | 11.49 | 0.06 | 1.162 down | 2.194 down  | 0.00 | 266.99 | Thioredoxin binding protein TBP-2                        |
| 46545 | 7.01  | 0.05 | 8.22  | 0.21 | 11.21 | 0.38 | 2.305 up   | 18.397 up   | 0.00 | 143.43 | Prephenate dehydrogenase                                 |
| 46763 | 12.42 | 0.12 | 12.78 | 0.05 | 10.56 | 0.27 | 1.281 up   | 3.639 down  | 0.00 | 89.64  | endonuclease/exonuclease/phosphatase family protein      |
| 46816 | 8.71  | 0.07 | 7.63  | 0.28 | 10.41 | 0.23 | 2.115 down | 3.253 up    | 0.00 | 116.09 | GH3 $\beta$ -glucosidase CEL3d                           |
| 47077 | 10.59 | 0.12 | 9.60  | 0.11 | 9.58  | 0.15 | 1.986 down | 2.020 down  | 0.00 | 39.58  | diunknown proteingenease                                 |
| 47136 | 10.93 | 0.07 | 11.02 | 0.04 | 12.18 | 0.23 | 1.064 up   | 2.384 up    | 0.00 | 42.62  | Glutathione peroxidase                                   |
| 47268 | 11.21 | 0.06 | 12.44 | 0.02 | 12.76 | 0.29 | 2.346 up   | 2.922 up    | 0.00 | 32.26  | GH3 $\beta$ -glucosidase BGL3i                           |
| 47286 | 13.64 | 0.10 | 12.87 | 0.05 | 12.40 | 0.32 | 1.704 down | 2.369 down  | 0.01 | 15.76  | unknown protein                                          |
| 47315 | 10.91 | 0.01 | 9.74  | 0.14 | 9.62  | 0.27 | 2.264 down | 2.449 down  | 0.01 | 25.47  | P-type ATPase                                            |
| 47330 | 10.67 | 0.11 | 11.33 | 0.08 | 12.72 | 0.20 | 1.578 up   | 4.142 up    | 0.00 | 112.69 | SSCRP                                                    |
| 47479 | 11.08 | 0.18 | 11.38 | 0.08 | 9.37  | 0.37 | 1.229 up   | 3.275 down  | 0.00 | 39.96  | Zn2Cys6 transcriptional regulator                        |
| 47510 | 11.79 | 0.13 | 12.33 | 0.25 | 12.95 | 0.34 | 1.451 up   | 2.230 up    | 0.02 | 11.02  | Complex 1 LYR protein                                    |
| 47603 | 10.71 | 0.13 | 10.28 | 0.08 | 11.77 | 0.34 | 1.351 down | 2.082 up    | 0.01 | 23.36  | succinyl-CoA:3-ketoacid-coenzyme A transferase subunit A |
| 47733 | 11.87 | 0.05 | 13.84 | 0.09 | 14.21 | 0.18 | 3.912 up   | 5.034 up    | 0.00 | 178.55 | SSCRP                                                    |
| 47795 | 11.62 | 0.07 | 12.11 | 0.26 | 12.64 | 0.24 | 1.410 up   | 2.027 up    | 0.01 | 14.79  | ribosomal protein S10.                                   |
| 47814 | 12.94 | 0.00 | 12.89 | 0.09 | 11.64 | 0.34 | 1.035 down | 2.472 down  | 0.01 | 23.69  | prenylcysteine lyase. putative                           |
| 47926 | 9.50  | 0.17 | 10.29 | 0.12 | 11.64 | 0.29 | 1.723 up   | 4.383 up    | 0.00 | 57.08  | ABC1 family protein                                      |
| 48080 | 11.52 | 0.05 | 11.72 | 0.13 | 7.84  | 0.25 | 1.148 up   | 12.864 down | 0.00 | 341.98 | unknown protein                                          |

|       |       |      |       |      |       |      |             |              |      |        |                                                                                    |
|-------|-------|------|-------|------|-------|------|-------------|--------------|------|--------|------------------------------------------------------------------------------------|
| 48211 | 13.39 | 0.08 | 12.47 | 0.06 | 11.19 | 0.14 | 1.886 down  | 4.585 down   | 0.00 | 236.39 | unknown protein. intracellular                                                     |
| 48280 | 9.49  | 0.34 | 10.03 | 0.48 | 13.57 | 0.76 | 1.455 up    | 16.937 up    | 0.00 | 34.96  | unknown protein                                                                    |
| 48295 | 10.86 | 0.07 | 11.76 | 0.06 | 12.41 | 0.39 | 1.862 up    | 2.929 up     | 0.01 | 17.67  | unknown protein                                                                    |
| 48366 | 12.79 | 0.28 | 13.14 | 0.03 | 13.87 | 0.08 | 1.269 up    | 2.111 up     | 0.00 | 44.92  | 26S proteasome regulatory complex subunit Rpn12                                    |
| 48438 | 12.23 | 0.05 | 11.88 | 0.13 | 10.48 | 0.17 | 1.270 down  | 3.364 down   | 0.00 | 125.44 | Zn2Cys6 transcriptional regulator                                                  |
| 48792 | 11.02 | 0.05 | 12.15 | 0.27 | 12.80 | 0.15 | 2.193 up    | 3.449 up     | 0.00 | 73.33  | amidase                                                                            |
| 48951 | 12.71 | 0.21 | 12.37 | 0.04 | 11.56 | 0.10 | 1.266 down  | 2.215 down   | 0.00 | 66.59  | unknown protein                                                                    |
| 49048 | 10.91 | 0.13 | 9.81  | 0.07 | 8.30  | 0.24 | 2.152 down  | 6.111 down   | 0.00 | 126.53 | RNA-dependent RNA-polymerase                                                       |
| 49081 | 8.73  | 0.08 | 7.12  | 0.10 | 13.14 | 0.31 | 3.051 down  | 21.255 up    | 0.00 | 477.21 | GH74 Xyloglucanase CEL74a                                                          |
| 49112 | 12.14 | 0.10 | 11.14 | 0.04 | 10.64 | 0.17 | 2.004 down  | 2.831 down   | 0.00 | 76.38  | Glutamate-1-semialdehyde aminotransferase                                          |
| 49149 | 10.33 | 0.01 | 11.20 | 0.27 | 11.93 | 0.26 | 1.817 up    | 3.015 up     | 0.00 | 32.01  | Translocation protein Sec66                                                        |
| 49193 | 12.94 | 0.04 | 13.29 | 0.14 | 13.99 | 0.33 | 1.274 up    | 2.066 up     | 0.02 | 11.75  | GH17 glucan 1.3- $\beta$ -glucosidase                                              |
| 49295 | 12.23 | 0.14 | 12.05 | 0.02 | 11.22 | 0.11 | 1.128 down  | 2.004 down   | 0.00 | 80.42  | unknown protein                                                                    |
| 49366 | 12.46 | 0.18 | 9.16  | 0.14 | 10.27 | 0.16 | 9.869 down  | 4.569 down   | 0.00 | 223.32 | unknown protein                                                                    |
| 49517 | 10.83 | 0.07 | 11.38 | 0.22 | 12.22 | 0.17 | 1.469 up    | 2.630 up     | 0.00 | 49.67  | unknown protein                                                                    |
| 49589 | 13.23 | 0.17 | 12.76 | 0.00 | 6.17  | 0.46 | 1.387 down  | 133.610 down | 0.00 | 350.57 | unknown protein                                                                    |
| 49753 | 11.05 | 0.14 | 10.40 | 0.04 | 9.40  | 0.12 | 1.570 down  | 3.133 down   | 0.00 | 146.60 | L-arabinitol 4-dehydrogenase                                                       |
| 49832 | 11.96 | 0.07 | 11.75 | 0.10 | 10.63 | 0.12 | 1.155 down  | 2.510 down   | 0.00 | 137.20 | QDE2. Argonaute-like protein. essential for quelling                               |
| 49864 | 11.99 | 0.14 | 12.39 | 0.15 | 13.11 | 0.12 | 1.322 up    | 2.180 up     | 0.00 | 55.05  | unknown protein                                                                    |
| 49928 | 8.73  | 0.03 | 8.54  | 0.07 | 11.65 | 0.27 | 1.144 down  | 7.578 up     | 0.00 | 197.05 | unknown protein. only in Sordariomycetes                                           |
| 49976 | 8.40  | 0.20 | 4.56  | 0.03 | 13.34 | 0.39 | 14.409 down | 30.525 up    | 0.00 | 558.57 | GH5 endo- $\beta$ -1.4-glucanase EGL5/CEL45a                                       |
| 50077 | 10.12 | 0.18 | 11.21 | 0.05 | 11.34 | 0.25 | 2.121 up    | 2.333 up     | 0.01 | 23.77  | Amino acid transporters                                                            |
| 50104 | 9.38  | 0.19 | 10.19 | 0.14 | 10.41 | 0.38 | 1.752 up    | 2.040 up     | 0.05 | 7.43   | phosphatidyl synthase ( <i>A. fumigatus</i> )                                      |
| 50215 | 11.33 | 0.10 | 8.66  | 0.02 | 12.58 | 0.30 | 6.380 down  | 2.374 up     | 0.00 | 186.73 | GH16 endo-1.3- $\beta$ -D-glucosidase/1.3-glucan binding protein                   |
| 50249 | 13.26 | 0.14 | 12.96 | 0.00 | 12.18 | 0.09 | 1.231 down  | 2.103 down   | 0.00 | 104.05 | peptidase family M3                                                                |
| 50323 | 7.59  | 0.00 | 8.75  | 0.13 | 9.44  | 0.45 | 2.246 up    | 3.620 up     | 0.01 | 18.56  | OOC1                                                                               |
| 50429 | 9.35  | 0.22 | 10.04 | 0.12 | 11.16 | 0.27 | 1.620 up    | 3.515 up     | 0.00 | 41.38  | unknown protein                                                                    |
| 50516 | 12.60 | 0.02 | 13.30 | 0.05 | 13.63 | 0.04 | 1.621 up    | 2.032 up     | 0.00 | 505.61 | ATPase. V-type                                                                     |
| 50583 | 10.25 | 0.14 | 9.61  | 0.08 | 8.30  | 0.13 | 1.556 down  | 3.869 down   | 0.00 | 196.00 | Guanine deaminase (GDEase). an aminohydrolase responsible for the conversion of Gu |

|       |       |      |       |      |       |      |            |             |      |         |                                                                               |
|-------|-------|------|-------|------|-------|------|------------|-------------|------|---------|-------------------------------------------------------------------------------|
| 50593 | 10.16 | 0.18 | 11.63 | 0.10 | 11.67 | 0.04 | 2.758 up   | 2.845 up    | 0.00 | 182.36  | 5' nucleotidase                                                               |
| 50616 | 10.40 | 0.42 | 10.56 | 0.19 | 7.36  | 1.34 | 1.118 up   | 8.243 down  | 0.04 | 8.71    | Coenzyme A transferase                                                        |
| 50625 | 13.23 | 0.01 | 12.96 | 0.24 | 12.22 | 0.16 | 1.201 down | 2.018 down  | 0.00 | 30.11   | unknown protein                                                               |
| 50786 | 11.63 | 0.12 | 13.23 | 0.26 | 13.14 | 0.16 | 3.020 up   | 2.845 up    | 0.00 | 56.08   | Flavin-linked sulfhydryl oxidase                                              |
| 50996 | 10.82 | 0.02 | 8.64  | 0.14 | 7.91  | 0.51 | 4.528 down | 7.482 down  | 0.00 | 35.39   | unknown protein. C2 domain                                                    |
| 51130 | 11.66 | 0.13 | 11.57 | 0.22 | 12.78 | 0.36 | 1.063 down | 2.182 up    | 0.01 | 15.22   | cytochrome c                                                                  |
| 51375 | 11.81 | 0.01 | 12.78 | 0.12 | 13.40 | 0.14 | 1.968 up   | 3.018 up    | 0.00 | 118.93  | unknown protein                                                               |
| 51407 | 11.59 | 0.12 | 10.78 | 0.03 | 10.46 | 0.21 | 1.753 down | 2.200 down  | 0.00 | 29.70   | unknown protein                                                               |
| 51415 | 13.00 | 0.11 | 12.12 | 0.07 | 11.76 | 0.40 | 1.841 down | 2.361 down  | 0.03 | 10.32   | unknown protein                                                               |
| 51426 | 12.55 | 0.12 | 12.88 | 0.27 | 14.01 | 0.13 | 1.256 up   | 2.757 up    | 0.00 | 61.75   | Ribosomal protein L30 based on homology with similar proteins in other fungi. |
| 51558 | 12.02 | 0.05 | 11.60 | 0.12 | 10.63 | 0.19 | 1.335 down | 2.630 down  | 0.00 | 61.53   | unknown protein                                                               |
| 51603 | 13.58 | 0.00 | 13.45 | 0.01 | 12.39 | 0.11 | 1.097 down | 2.285 down  | 0.00 | 180.82  | unknown protein                                                               |
| 51654 | 8.76  | 0.02 | 8.46  | 0.13 | 7.44  | 0.48 | 1.231 down | 2.496 down  | 0.03 | 10.15   | unknown protein                                                               |
| 51846 | 12.50 | 0.01 | 12.35 | 0.22 | 11.27 | 0.20 | 1.113 down | 2.358 down  | 0.00 | 42.05   | Zn2Cys6 transcriptional regulator                                             |
| 52073 | 13.53 | 0.22 | 12.28 | 0.03 | 12.07 | 0.18 | 2.362 down | 2.743 down  | 0.00 | 48.70   | sulfatase                                                                     |
| 52222 | 8.32  | 0.10 | 7.53  | 0.05 | 6.75  | 0.27 | 1.733 down | 2.984 down  | 0.00 | 35.59   | ankyrin repeat domain-containing protein                                      |
| 52315 | 3.50  | 0.18 | 3.45  | 0.42 | 14.38 | 0.06 | 1.038 down | 1882.167 up | 0.00 | 2729.49 | copper transporter Ctr                                                        |
| 52476 | 7.53  | 0.13 | 12.78 | 0.18 | 12.10 | 0.77 | 38.161 up  | 23.863 up   | 0.00 | 48.07   | unknown protein                                                               |
| 52499 | 11.43 | 0.00 | 11.38 | 0.21 | 9.95  | 0.13 | 1.035 down | 2.786 down  | 0.00 | 112.08  | C2H2 transcriptional regulator                                                |
| 52505 | 11.34 | 0.02 | 11.74 | 0.00 | 12.37 | 0.33 | 1.315 up   | 2.034 up    | 0.02 | 11.51   | unknown protein                                                               |
| 52875 | 12.72 | 0.10 | 12.12 | 0.13 | 10.79 | 0.35 | 1.522 down | 3.806 down  | 0.00 | 35.41   | Zn2Cys6 transcriptional regulator                                             |
| 53004 | 12.10 | 0.01 | 12.24 | 0.11 | 10.89 | 0.18 | 1.103 up   | 2.307 down  | 0.00 | 71.27   | protein tyrosine phosphatase activity. M phase of mitotic cell cycle          |
| 53029 | 3.87  | 0.59 | 3.71  | 0.11 | 4.88  | 0.22 | 1.115 down | 2.011 up    | 0.02 | 11.81   | $\beta$ -lactamase-like protein                                               |
| 53053 | 10.19 | 0.17 | 12.43 | 0.03 | 12.59 | 0.08 | 4.738 up   | 5.307 up    | 0.00 | 420.23  | unknown protein                                                               |
| 53079 | 10.68 | 0.16 | 8.65  | 0.15 | 8.21  | 0.83 | 4.105 down | 5.546 down  | 0.03 | 9.83    | NADP/FAD dependent oxidoreductase                                             |
| 53153 | 9.26  | 0.01 | 9.14  | 0.04 | 7.89  | 0.23 | 1.092 down | 2.593 down  | 0.00 | 55.17   | unknown protein                                                               |
| 53168 | 2.80  | 0.05 | 2.77  | 0.05 | 4.64  | 0.46 | 1.024 down | 3.572 up    | 0.01 | 26.35   | Cytochrome P450. putative                                                     |
| 53186 | 5.71  | 0.05 | 6.10  | 0.05 | 7.82  | 0.51 | 1.317 up   | 4.326 up    | 0.01 | 24.10   | PL20 glucuronan lyase A                                                       |
| 53282 | 7.05  | 0.42 | 6.98  | 0.06 | 8.29  | 0.42 | 1.047 down | 2.361 up    | 0.02 | 11.29   | NAD(P)H-dependent FMN reductase LOT6. putative                                |
| 53314 | 6.12  | 0.37 | 6.71  | 0.09 | 7.21  | 0.15 | 1.507 up   | 2.126 up    | 0.01 | 18.31   | unknown protein                                                               |

|       |       |      |       |      |       |      |            |             |      |        |                                                          |
|-------|-------|------|-------|------|-------|------|------------|-------------|------|--------|----------------------------------------------------------|
| 53334 | 8.51  | 0.08 | 9.13  | 0.01 | 9.60  | 0.22 | 1.530 up   | 2.122 up    | 0.01 | 26.49  | unknown protein                                          |
| 53360 | 9.98  | 0.06 | 9.02  | 0.07 | 8.60  | 0.34 | 1.942 down | 2.594 down  | 0.01 | 17.39  | SSCRP                                                    |
| 53366 | 9.94  | 0.15 | 10.38 | 0.03 | 11.05 | 0.04 | 1.353 up   | 2.151 up    | 0.00 | 150.61 | translation initiation protein Sua5p.                    |
| 53372 | 11.26 | 0.14 | 9.80  | 0.18 | 10.10 | 0.16 | 2.753 down | 2.231 down  | 0.00 | 46.37  | acyltransferase 3                                        |
| 53373 | 13.32 | 0.11 | 13.00 | 0.22 | 11.54 | 0.16 | 1.248 down | 3.435 down  | 0.00 | 99.03  | CoA-transferase family III                               |
| 53378 | 3.49  | 0.28 | 4.28  | 0.23 | 5.21  | 0.25 | 1.733 up   | 3.298 up    | 0.00 | 32.90  | siderophore transporter                                  |
| 53401 | 10.03 | 0.03 | 10.29 | 0.00 | 8.59  | 0.30 | 1.200 up   | 2.706 down  | 0.00 | 47.28  | unknown protein                                          |
| 53428 | 9.57  | 0.18 | 9.58  | 0.10 | 6.38  | 0.45 | 1.005 up   | 9.099 down  | 0.00 | 77.20  | SAM-dependent methyltransferase                          |
| 53452 | 2.22  | 0.03 | 2.32  | 0.14 | 3.99  | 0.09 | 1.070 up   | 3.399 up    | 0.00 | 361.91 | unknown protein                                          |
| 53475 | 11.33 | 0.05 | 10.27 | 0.04 | 9.82  | 0.09 | 2.083 down | 2.851 down  | 0.00 | 271.95 | MFS permease                                             |
| 53500 | 10.94 | 0.05 | 10.92 | 0.01 | 8.30  | 0.28 | 1.012 down | 6.223 down  | 0.00 | 146.60 | unknown protein                                          |
| 53501 | 11.71 | 0.06 | 10.77 | 0.27 | 10.64 | 0.24 | 1.921 down | 2.097 down  | 0.01 | 16.52  | unknown protein                                          |
| 53525 | 9.00  | 0.07 | 9.30  | 0.09 | 10.09 | 0.14 | 1.224 up   | 2.126 up    | 0.00 | 67.53  | unknown protein (tyrosin phosphatase domain)             |
| 53542 | 13.99 | 0.00 | 13.66 | 0.07 | 12.53 | 0.04 | 1.254 down | 2.746 down  | 0.00 | 877.04 | GH76 $\alpha$ -1.6-mannanase                             |
| 53561 | 10.83 | 0.02 | 9.51  | 0.01 | 8.54  | 0.38 | 2.483 down | 4.876 down  | 0.00 | 40.70  | unknown protein                                          |
| 53596 | 9.97  | 0.11 | 10.38 | 0.08 | 11.00 | 0.09 | 1.330 up   | 2.044 up    | 0.00 | 89.95  | unknown protein                                          |
| 53611 | 10.79 | 0.11 | 9.72  | 0.15 | 8.52  | 0.25 | 2.105 down | 4.822 down  | 0.00 | 79.84  | MFS permease                                             |
| 53615 | 10.94 | 0.01 | 10.47 | 0.03 | 9.55  | 0.18 | 1.383 down | 2.620 down  | 0.00 | 73.72  | unknown protein with WD repeats                          |
| 53665 | 4.80  | 0.26 | 5.21  | 0.10 | 6.81  | 0.09 | 1.329 up   | 4.049 up    | 0.00 | 165.54 | unknown protein                                          |
| 53672 | 12.28 | 0.01 | 11.49 | 0.04 | 10.83 | 0.17 | 1.729 down | 2.741 down  | 0.00 | 83.44  | unknown protein                                          |
| 53673 | 12.24 | 0.04 | 11.36 | 0.05 | 13.29 | 0.27 | 1.835 down | 2.072 up    | 0.00 | 57.85  | NADP:D-xylose dehydrogenase [ <i>Hypocrea jecorina</i> ] |
| 53701 | 10.67 | 0.05 | 10.87 | 0.22 | 11.94 | 0.23 | 1.149 up   | 2.411 up    | 0.00 | 33.28  | unknown protein                                          |
| 53747 | 8.19  | 0.16 | 8.74  | 0.04 | 6.66  | 0.43 | 1.468 up   | 2.879 down  | 0.00 | 29.88  | unknown protein                                          |
| 53777 | 11.75 | 0.01 | 10.36 | 0.21 | 8.39  | 0.36 | 2.621 down | 10.284 down | 0.00 | 93.14  | unknown protein                                          |
| 53824 | 11.12 | 0.08 | 7.92  | 0.11 | 9.00  | 0.62 | 9.191 down | 4.343 down  | 0.01 | 23.12  | unknown secreted protein                                 |
| 53859 | 12.24 | 0.04 | 12.01 | 0.04 | 10.56 | 0.14 | 1.176 down | 3.203 down  | 0.00 | 196.84 | C-4 sterol methyl oxidase                                |
| 53862 | 3.54  | 0.16 | 4.12  | 0.05 | 5.31  | 0.20 | 1.501 up   | 3.430 up    | 0.00 | 79.72  | unknown protein with WD repeats                          |
| 53863 | 6.54  | 0.12 | 6.23  | 0.04 | 7.93  | 0.35 | 1.246 down | 2.616 up    | 0.00 | 31.97  | Flavoprotein monooxygenase                               |
| 53868 | 9.12  | 0.12 | 8.15  | 0.07 | 7.44  | 0.17 | 1.960 down | 3.207 down  | 0.00 | 86.72  | NADH:flavin oxidoreductase/NADH oxidase                  |
| 53888 | 9.70  | 0.14 | 8.72  | 0.09 | 8.29  | 0.08 | 1.981 down | 2.663 down  | 0.00 | 137.85 | pirin                                                    |

|       |       |      |       |      |       |      |             |             |      |        |                                                                                           |
|-------|-------|------|-------|------|-------|------|-------------|-------------|------|--------|-------------------------------------------------------------------------------------------|
| 53903 | 9.91  | 0.02 | 8.92  | 0.08 | 6.84  | 0.53 | 1.980 down  | 8.402 down  | 0.00 | 42.33  | MFS permease                                                                              |
| 53939 | 11.24 | 0.09 | 11.55 | 0.22 | 10.17 | 0.02 | 1.238 up    | 2.099 down  | 0.00 | 128.68 | DNA polymerase $\gamma$ family member involved in translesion synthesis during DNA repair |
| 53956 | 12.23 | 0.02 | 12.53 | 0.10 | 11.14 | 0.24 | 1.231 up    | 2.129 down  | 0.00 | 43.55  | unknown protein                                                                           |
| 53961 | 11.44 | 0.11 | 7.67  | 0.05 | 8.37  | 0.34 | 13.697 down | 8.413 down  | 0.00 | 116.41 | Aspartyl protease                                                                         |
| 53964 | 3.69  | 0.26 | 4.24  | 0.10 | 6.28  | 0.45 | 1.471 up    | 6.049 up    | 0.00 | 39.50  | oxalate decarboxylase                                                                     |
| 53989 | 11.09 | 0.15 | 10.71 | 0.13 | 9.71  | 0.30 | 1.298 down  | 2.593 down  | 0.01 | 24.27  | pfkB family kinase. putative                                                              |
| 54048 | 10.23 | 0.05 | 8.90  | 0.19 | 7.82  | 0.34 | 2.510 down  | 5.314 down  | 0.00 | 50.05  | unknown protein                                                                           |
| 54052 | 7.02  | 0.67 | 8.60  | 0.28 | 11.25 | 0.45 | 2.977 up    | 18.694 up   | 0.00 | 57.95  | unknown protein                                                                           |
| 54089 | 5.43  | 0.36 | 5.88  | 0.11 | 7.38  | 0.32 | 1.367 up    | 3.852 up    | 0.00 | 34.61  | unknown protein                                                                           |
| 54128 | 10.79 | 0.16 | 10.71 | 0.12 | 9.48  | 0.24 | 1.056 down  | 2.477 down  | 0.00 | 38.54  | IlvA Threonine dehydratase                                                                |
| 54144 | 9.46  | 0.05 | 9.33  | 0.10 | 11.11 | 0.08 | 1.097 down  | 3.141 up    | 0.00 | 470.57 | ferric reductase                                                                          |
| 54160 | 3.12  | 0.07 | 2.99  | 0.04 | 4.95  | 0.13 | 1.095 down  | 3.539 up    | 0.00 | 298.65 | Glil [ <i>Aspergillus fumigatus</i> ]                                                     |
| 54166 | 12.55 | 0.13 | 12.31 | 0.09 | 11.01 | 0.30 | 1.179 down  | 2.905 down  | 0.00 | 34.39  | Cytochrome P450                                                                           |
| 54179 | 4.69  | 0.27 | 4.79  | 0.03 | 6.19  | 0.08 | 1.067 up    | 2.827 up    | 0.00 | 119.04 | glutathione S-transferase                                                                 |
| 54202 | 11.23 | 0.09 | 11.09 | 0.10 | 10.04 | 0.18 | 1.098 down  | 2.275 down  | 0.00 | 57.10  | unknown protein. contains DUF155 domain                                                   |
| 54226 | 10.39 | 0.14 | 9.91  | 0.05 | 11.70 | 0.19 | 1.394 down  | 2.478 up    | 0.00 | 96.21  | unknown protein                                                                           |
| 54227 | 9.66  | 0.05 | 6.46  | 0.02 | 6.73  | 0.50 | 9.221 down  | 7.643 down  | 0.00 | 45.89  | short-chain dehydrogenase/reductase                                                       |
| 54230 | 9.27  | 0.03 | 8.44  | 0.09 | 7.60  | 0.56 | 1.777 down  | 3.192 down  | 0.03 | 10.05  | NACHT domain WD40 repeat-containing protein. related to HET                               |
| 54239 | 11.12 | 0.04 | 8.87  | 0.13 | 9.37  | 0.34 | 4.733 down  | 3.356 down  | 0.00 | 40.13  | Multicopper oxidases                                                                      |
| 54285 | 11.88 | 0.08 | 11.57 | 0.01 | 10.37 | 0.11 | 1.239 down  | 2.840 down  | 0.00 | 219.80 | unknown protein                                                                           |
| 54335 | 12.53 | 0.15 | 12.12 | 0.02 | 11.08 | 0.22 | 1.329 down  | 2.742 down  | 0.00 | 47.59  | unknown protein                                                                           |
| 54349 | 11.44 | 0.02 | 12.16 | 0.12 | 13.12 | 0.31 | 1.637 up    | 3.184 up    | 0.00 | 32.35  | small nuclear ribonucleoprotein F                                                         |
| 54352 | 10.88 | 0.20 | 9.54  | 0.12 | 7.14  | 0.38 | 2.527 down  | 13.359 down | 0.00 | 106.81 | unknown protein.                                                                          |
| 54366 | 8.59  | 0.19 | 8.36  | 0.04 | 7.03  | 0.26 | 1.169 down  | 2.940 down  | 0.00 | 44.69  | ceramidase. nonlysosomal                                                                  |
| 54426 | 6.54  | 0.18 | 6.74  | 0.11 | 7.84  | 0.26 | 1.145 up    | 2.457 up    | 0.00 | 29.53  | unknown protein                                                                           |
| 54444 | 10.03 | 0.21 | 10.02 | 0.12 | 8.44  | 0.40 | 1.005 down  | 3.004 down  | 0.01 | 23.57  | unknown protein                                                                           |
| 54461 | 3.62  | 0.44 | 3.54  | 0.08 | 6.57  | 1.36 | 1.056 down  | 7.740 up    | 0.04 | 7.78   | MFS permease                                                                              |
| 54462 | 4.15  | 0.36 | 4.80  | 0.02 | 6.02  | 0.11 | 1.567 up    | 3.654 up    | 0.00 | 78.93  | unknown protein                                                                           |
| 54469 | 11.85 | 0.02 | 11.62 | 0.10 | 10.45 | 0.16 | 1.174 down  | 2.646 down  | 0.00 | 100.97 | Vacuolar transporter chaperone 4 (vtc4). putative                                         |
| 54550 | 9.43  | 0.02 | 9.43  | 0.01 | 8.33  | 0.10 | 1.001 down  | 2.149 down  | 0.00 | 185.46 | short chain dehydrogenase/reductase                                                       |



|       |       |      |       |      |       |      |            |             |      |        |                                                                                      |
|-------|-------|------|-------|------|-------|------|------------|-------------|------|--------|--------------------------------------------------------------------------------------|
| 54611 | 12.45 | 0.17 | 12.57 | 0.09 | 14.11 | 0.18 | 1.086 up   | 3.175 up    | 0.00 | 99.58  | unknown protein                                                                      |
| 54622 | 6.21  | 0.10 | 4.86  | 0.06 | 8.44  | 0.37 | 2.553 down | 4.686 up    | 0.00 | 111.46 | unknown protein                                                                      |
| 54633 | 13.01 | 0.02 | 12.59 | 0.01 | 11.88 | 0.35 | 1.339 down | 2.183 down  | 0.02 | 12.87  | GT $\beta$ -glycosyltransferases                                                     |
| 54659 | 12.91 | 0.18 | 12.52 | 0.08 | 11.06 | 0.56 | 1.315 down | 3.606 down  | 0.02 | 14.13  | unknown protein                                                                      |
| 54667 | 9.67  | 0.07 | 12.33 | 0.13 | 13.25 | 0.31 | 6.311 up   | 11.946 up   | 0.00 | 141.91 | acyl-CoA synthetase                                                                  |
| 54669 | 4.89  | 1.18 | 5.53  | 0.10 | 8.14  | 0.28 | 1.552 up   | 9.480 up    | 0.01 | 26.79  | Golgi matrix protein. rud3. involved in the structural organization of the cis-Golgi |
| 54674 | 11.59 | 0.00 | 12.05 | 0.08 | 10.56 | 0.29 | 1.375 up   | 2.033 down  | 0.00 | 31.52  | unknown protein                                                                      |
| 54676 | 9.75  | 0.17 | 9.97  | 0.25 | 10.90 | 0.46 | 1.169 up   | 2.232 up    | 0.04 | 7.58   | COX17. cytochrome C oxidase assembly protein                                         |
| 54694 | 11.81 | 0.02 | 9.73  | 0.09 | 8.39  | 0.30 | 4.224 down | 10.692 down | 0.00 | 136.18 | aryl-alcohol dehydrogenases                                                          |
| 54703 | 11.98 | 0.01 | 10.57 | 0.00 | 10.65 | 0.21 | 2.647 down | 2.513 down  | 0.00 | 50.71  | C2H2 transcriptional regulator                                                       |
| 54723 | 2.95  | 0.14 | 2.91  | 0.03 | 4.38  | 0.03 | 1.025 down | 2.698 up    | 0.00 | 460.57 | SSCRP                                                                                |
| 54761 | 5.79  | 0.13 | 3.84  | 0.08 | 7.53  | 1.13 | 3.862 down | 3.324 up    | 0.02 | 11.89  | quercetin 2,3-diunknown proteingeenase                                               |
| 54768 | 11.25 | 0.09 | 13.93 | 0.07 | 13.34 | 0.17 | 6.432 up   | 4.254 up    | 0.00 | 217.38 | unknown protein                                                                      |
| 54784 | 2.85  | 0.07 | 2.92  | 0.06 | 4.70  | 0.10 | 1.049 up   | 3.593 up    | 0.00 | 423.61 | unknown protein                                                                      |
| 54789 | 4.33  | 0.17 | 4.88  | 0.34 | 5.96  | 0.55 | 1.464 up   | 3.105 up    | 0.03 | 9.66   | short chain dehydrogenase/reductase                                                  |
| 54790 | 8.87  | 0.16 | 8.39  | 0.00 | 7.16  | 0.25 | 1.395 down | 3.263 down  | 0.00 | 53.39  | unknown protein                                                                      |
| 54846 | 9.26  | 0.10 | 9.22  | 0.20 | 7.51  | 0.34 | 1.025 down | 3.366 down  | 0.00 | 38.23  | half-sized ABC transporter                                                           |
| 54870 | 12.57 | 0.12 | 12.53 | 0.04 | 11.47 | 0.26 | 1.025 down | 2.143 down  | 0.01 | 27.18  | acetate—CoA ligase                                                                   |
| 54893 | 12.97 | 0.16 | 13.15 | 0.05 | 11.73 | 0.26 | 1.138 up   | 2.349 down  | 0.00 | 38.18  | unknown protein                                                                      |
| 54902 | 7.59  | 0.04 | 7.68  | 0.00 | 5.94  | 0.51 | 1.062 up   | 3.137 down  | 0.01 | 18.63  | unknown protein                                                                      |
| 54954 | 6.53  | 0.42 | 6.31  | 0.17 | 5.07  | 0.31 | 1.163 down | 2.740 down  | 0.01 | 18.86  | MRP-type ABC transporter                                                             |
| 54972 | 8.47  | 0.05 | 6.77  | 0.03 | 5.49  | 0.14 | 3.231 down | 7.847 down  | 0.00 | 508.28 | MFS permease                                                                         |
| 55034 | 13.17 | 0.02 | 12.22 | 0.17 | 11.57 | 0.24 | 1.932 down | 3.027 down  | 0.00 | 41.50  | unknown protein                                                                      |
| 55036 | 6.89  | 0.06 | 7.93  | 0.17 | 8.88  | 0.29 | 2.055 up   | 3.968 up    | 0.00 | 47.40  | unknown protein                                                                      |
| 55039 | 5.97  | 0.00 | 7.79  | 0.37 | 7.71  | 0.21 | 3.534 up   | 3.347 up    | 0.00 | 43.72  | unknown protein                                                                      |
| 55041 | 10.32 | 0.22 | 10.16 | 0.01 | 9.24  | 0.18 | 1.115 down | 2.113 down  | 0.00 | 33.85  | unknown protein                                                                      |
| 55060 | 9.86  | 0.09 | 11.18 | 0.07 | 10.87 | 0.19 | 2.487 up   | 2.002 up    | 0.00 | 42.09  | kinesin heavy chain                                                                  |
| 55105 | 9.04  | 0.07 | 8.08  | 0.16 | 7.75  | 0.13 | 1.935 down | 2.440 down  | 0.00 | 64.85  | Zn2Cys6 transcriptional regulator                                                    |
| 55126 | 10.02 | 0.11 | 8.82  | 0.09 | 8.77  | 0.36 | 2.304 down | 2.382 down  | 0.02 | 14.38  | unknown protein                                                                      |
| 55172 | 9.16  | 0.01 | 9.56  | 0.02 | 10.83 | 0.16 | 1.324 up   | 3.179 up    | 0.00 | 141.66 | unknown protein                                                                      |

|       |       |      |       |      |       |      |            |            |      |        |                                                                              |
|-------|-------|------|-------|------|-------|------|------------|------------|------|--------|------------------------------------------------------------------------------|
| 55193 | 9.43  | 0.14 | 8.36  | 0.11 | 7.88  | 0.29 | 2.101 down | 2.923 down | 0.01 | 28.26  | unknown protein                                                              |
| 55213 | 9.00  | 0.04 | 9.09  | 0.08 | 7.70  | 0.35 | 1.066 up   | 2.472 down | 0.01 | 24.21  | tRNA-specific adenosine deaminase                                            |
| 55240 | 11.61 | 0.22 | 8.84  | 0.01 | 9.82  | 0.27 | 6.843 down | 3.475 down | 0.00 | 75.62  | large-conductance mechanosensitive channel                                   |
| 55272 | 13.40 | 0.01 | 14.67 | 0.10 | 14.62 | 0.07 | 2.401 up   | 2.322 up   | 0.00 | 220.27 | unknown protein                                                              |
| 55279 | 11.94 | 0.03 | 11.24 | 0.23 | 10.46 | 0.14 | 1.618 down | 2.786 down | 0.00 | 67.25  | unknown protein                                                              |
| 55353 | 12.32 | 0.04 | 12.02 | 0.07 | 10.47 | 0.13 | 1.233 down | 3.611 down | 0.00 | 268.80 | pathotenate kinase                                                           |
| 55362 | 10.38 | 0.11 | 9.15  | 0.19 | 9.37  | 0.09 | 2.356 down | 2.012 down | 0.00 | 66.68  | Heat shock protein 70                                                        |
| 55374 | 4.87  | 0.02 | 4.49  | 0.28 | 5.94  | 0.07 | 1.298 down | 2.104 up   | 0.00 | 89.51  | unknown protein                                                              |
| 55407 | 10.82 | 0.04 | 9.82  | 0.05 | 9.71  | 0.28 | 2.000 down | 2.158 down | 0.01 | 18.62  | MFS permease                                                                 |
| 55443 | 9.93  | 0.09 | 11.09 | 0.13 | 11.09 | 0.35 | 2.239 up   | 2.233 up   | 0.02 | 12.66  | unknown protein                                                              |
| 55454 | 11.89 | 0.08 | 11.63 | 0.16 | 10.28 | 0.13 | 1.195 down | 3.038 down | 0.00 | 131.81 | unknown protein                                                              |
| 55566 | 7.77  | 0.00 | 8.12  | 0.06 | 8.83  | 0.27 | 1.272 up   | 2.085 up   | 0.01 | 18.95  | multicopper oxidase                                                          |
| 55584 | 12.69 | 0.20 | 12.51 | 0.10 | 11.66 | 0.19 | 1.131 down | 2.033 down | 0.00 | 28.62  | unknown protein                                                              |
| 55589 | 11.34 | 0.08 | 12.27 | 0.22 | 12.87 | 0.19 | 1.915 up   | 2.906 up   | 0.00 | 47.10  | 3' exoribonuclease involved in RNA processing during translation.            |
| 55595 | 12.29 | 0.03 | 12.68 | 0.03 | 13.32 | 0.15 | 1.311 up   | 2.042 up   | 0.00 | 55.43  | Ca <sup>2+</sup> transporter                                                 |
| 55597 | 12.96 | 0.01 | 12.49 | 0.19 | 11.48 | 0.40 | 1.384 down | 2.787 down | 0.01 | 16.49  | unknown protein                                                              |
| 55599 | 11.04 | 0.00 | 10.26 | 0.03 | 9.87  | 0.13 | 1.710 down | 2.246 down | 0.00 | 92.06  | RNA 12 protein                                                               |
| 55630 | 10.45 | 0.32 | 8.50  | 0.01 | 7.48  | 0.17 | 3.870 down | 7.837 down | 0.00 | 159.88 | monocarboxylate transporter                                                  |
| 55631 | 13.01 | 0.16 | 12.39 | 0.00 | 11.81 | 0.26 | 1.531 down | 2.294 down | 0.01 | 22.27  | phospholipase                                                                |
| 55634 | 7.01  | 0.54 | 6.61  | 0.04 | 5.69  | 0.09 | 1.319 down | 2.506 down | 0.01 | 21.39  | MFS permease                                                                 |
| 55636 | 10.40 | 0.09 | 9.60  | 0.17 | 9.07  | 0.24 | 1.750 down | 2.511 down | 0.00 | 28.95  | MRP-type ABC transporter                                                     |
| 55637 | 9.83  | 0.28 | 9.06  | 0.02 | 8.38  | 0.29 | 1.710 down | 2.742 down | 0.01 | 21.16  | Unknown protein with RNA-dependent RNA polymerase (RdRP) and DEXDc/DEAD-like |
| 55666 | 3.59  | 0.10 | 3.67  | 0.45 | 5.67  | 0.03 | 1.057 up   | 4.246 up   | 0.00 | 96.97  | unknown protein with WD repeats                                              |
| 55671 | 4.37  | 0.35 | 5.10  | 0.38 | 5.53  | 0.11 | 1.665 up   | 2.237 up   | 0.01 | 14.72  | unknown protein                                                              |
| 55719 | 5.40  | 0.17 | 6.63  | 0.11 | 6.61  | 0.34 | 2.340 up   | 2.304 up   | 0.01 | 14.66  | Protein kinase                                                               |
| 55782 | 5.69  | 0.49 | 6.05  | 0.27 | 8.13  | 0.31 | 1.283 up   | 5.432 up   | 0.00 | 42.42  | dipeptidyl peptidase 5                                                       |
| 55802 | 8.68  | 0.02 | 9.12  | 0.07 | 11.46 | 0.65 | 1.351 up   | 6.833 up   | 0.01 | 25.69  | GH76 $\alpha$ -1.6-mannanase                                                 |
| 55871 | 6.59  | 0.19 | 4.80  | 0.03 | 5.02  | 0.24 | 3.474 down | 2.975 down | 0.00 | 49.29  | Short-chain dehydrogenase/reductase                                          |
| 55887 | 6.50  | 0.20 | 8.77  | 0.10 | 11.77 | 0.62 | 4.792 up   | 38.374 up  | 0.00 | 80.82  | unknown protein. secreted                                                    |
| 55999 | 8.14  | 0.04 | 7.07  | 0.10 | 9.36  | 0.25 | 2.100 down | 2.335 up   | 0.00 | 93.12  | GH27 $\alpha$ -galactosidase                                                 |

|       |       |      |       |      |       |      |            |            |      |        |                                                                       |
|-------|-------|------|-------|------|-------|------|------------|------------|------|--------|-----------------------------------------------------------------------|
| 56026 | 10.92 | 0.01 | 10.44 | 0.05 | 9.44  | 0.36 | 1.396 down | 2.779 down | 0.01 | 20.38  | unknown protein                                                       |
| 56064 | 14.14 | 0.12 | 13.91 | 0.12 | 12.81 | 0.11 | 1.179 down | 2.519 down | 0.00 | 119.36 | unknown protein                                                       |
| 56093 | 2.91  | 0.02 | 3.22  | 0.09 | 4.58  | 0.19 | 1.247 up   | 3.202 up   | 0.00 | 96.95  | unknown protein                                                       |
| 56117 | 12.28 | 0.14 | 12.36 | 0.07 | 10.93 | 0.16 | 1.054 up   | 2.548 down | 0.00 | 92.61  | unknown protein                                                       |
| 56141 | 12.39 | 0.13 | 11.59 | 0.06 | 10.76 | 0.59 | 1.738 down | 3.095 down | 0.04 | 8.66   | unknown protein                                                       |
| 56211 | 8.69  | 0.12 | 11.09 | 0.18 | 10.98 | 0.17 | 5.270 up   | 4.898 up   | 0.00 | 150.26 | unknown protein                                                       |
| 56218 | 11.43 | 0.05 | 11.97 | 0.12 | 10.00 | 0.18 | 1.453 up   | 2.688 down | 0.00 | 131.31 | unknown protein                                                       |
| 56236 | 6.42  | 0.37 | 6.15  | 0.45 | 7.87  | 0.57 | 1.201 down | 2.746 up   | 0.03 | 9.86   | SAM-dependent methyltransferases                                      |
| 56256 | 12.38 | 0.15 | 12.33 | 0.08 | 11.28 | 0.20 | 1.034 down | 2.133 down | 0.00 | 38.86  | unknown protein                                                       |
| 56259 | 3.29  | 0.24 | 3.79  | 0.37 | 5.09  | 0.24 | 1.422 up   | 3.484 up   | 0.00 | 35.31  | unknown protein                                                       |
| 56278 | 3.52  | 0.04 | 3.81  | 0.39 | 5.41  | 0.40 | 1.217 up   | 3.688 up   | 0.01 | 24.71  | unknown protein. in Sordariomycetes                                   |
| 56289 | 7.17  | 0.07 | 7.66  | 0.06 | 6.05  | 0.49 | 1.404 up   | 2.177 down | 0.02 | 13.76  | MFS permease                                                          |
| 56326 | 6.23  | 0.11 | 6.69  | 0.33 | 7.76  | 0.42 | 1.370 up   | 2.884 up   | 0.02 | 13.76  | Zinc-containing alcohol dehydrogenase                                 |
| 56350 | 4.55  | 0.13 | 4.32  | 0.15 | 5.85  | 0.19 | 1.175 down | 2.450 up   | 0.00 | 66.94  | cysteine synthase. putative                                           |
| 56376 | 7.86  | 0.19 | 8.78  | 0.03 | 9.00  | 0.21 | 1.888 up   | 2.202 up   | 0.01 | 26.77  | unknown protein                                                       |
| 56390 | 13.42 | 0.00 | 12.39 | 0.07 | 11.77 | 0.31 | 2.036 down | 3.134 down | 0.00 | 31.42  | unknown protein. TPR repeats                                          |
| 56399 | 12.53 | 0.03 | 11.79 | 0.08 | 10.98 | 0.23 | 1.669 down | 2.925 down | 0.00 | 50.08  | unknown protein                                                       |
| 56408 | 12.30 | 0.06 | 12.42 | 0.01 | 11.26 | 0.22 | 1.081 up   | 2.056 down | 0.00 | 40.20  | unknown protein                                                       |
| 56426 | 12.17 | 0.01 | 12.01 | 0.23 | 11.13 | 0.14 | 1.116 down | 2.044 down | 0.00 | 38.92  | GCPR. mPR-type                                                        |
| 56427 | 9.63  | 0.16 | 7.92  | 0.12 | 8.57  | 0.27 | 3.269 down | 2.089 down | 0.00 | 30.08  | Arylacetamide deacetylase                                             |
| 56434 | 5.33  | 0.02 | 4.92  | 0.07 | 7.22  | 0.09 | 1.327 down | 3.728 up   | 0.00 | 790.24 | FKBP-type peptidyl-prolyl isomerase. putative                         |
| 56448 | 6.82  | 0.09 | 5.56  | 0.04 | 8.23  | 0.11 | 2.402 down | 2.663 up   | 0.00 | 579.00 | GH18 chitinase CHI18-11                                               |
| 56467 | 7.09  | 0.18 | 7.83  | 0.01 | 8.37  | 0.10 | 1.678 up   | 2.430 up   | 0.00 | 87.54  | Mitochondrial deoxynucleotide carrier protein                         |
| 56469 | 11.29 | 0.18 | 11.51 | 0.08 | 9.94  | 0.03 | 1.172 up   | 2.548 down | 0.00 | 269.90 | unknown protein                                                       |
| 56499 | 8.67  | 0.23 | 9.48  | 0.11 | 10.24 | 0.41 | 1.754 up   | 2.959 up   | 0.01 | 14.90  | N-acyl-phosphatidylethanolamine-hydrolyzing phospholipase D. putative |
| 56515 | 9.47  | 0.09 | 8.65  | 0.18 | 6.25  | 0.43 | 1.767 down | 9.316 down | 0.00 | 67.97  | Regulation of HR towards crossover                                    |
| 56546 | 10.44 | 0.06 | 12.54 | 0.30 | 12.94 | 0.12 | 4.290 up   | 5.674 up   | 0.00 | 158.05 | unknown protein. 3TM                                                  |
| 56572 | 12.24 | 0.02 | 11.77 | 0.10 | 9.98  | 0.23 | 1.383 down | 4.784 down | 0.00 | 119.48 | aminotransferase. classes I and II family                             |
| 56587 | 10.36 | 0.11 | 10.03 | 0.01 | 7.95  | 0.21 | 1.259 down | 5.312 down | 0.00 | 174.73 | GCN5-related N-acetyltransferase                                      |
| 56625 | 12.23 | 0.08 | 12.37 | 0.13 | 10.90 | 0.24 | 1.101 up   | 2.505 down | 0.00 | 51.32  | CoA-transferase family III                                            |

|       |       |      |       |      |       |      |            |            |      |        |                                                                                   |
|-------|-------|------|-------|------|-------|------|------------|------------|------|--------|-----------------------------------------------------------------------------------|
| 56646 | 9.02  | 0.05 | 8.64  | 0.01 | 7.47  | 0.48 | 1.307 down | 2.940 down | 0.02 | 13.82  | monoamine oxidase                                                                 |
| 56671 | 7.62  | 0.20 | 8.53  | 0.02 | 8.85  | 0.43 | 1.885 up   | 2.349 up   | 0.04 | 8.60   | unknown protein                                                                   |
| 56726 | 9.58  | 0.17 | 9.94  | 0.10 | 11.02 | 0.12 | 1.287 up   | 2.717 up   | 0.00 | 103.61 | Branched chain alpha-keto acid dehydrogenase complex. alpha subunit               |
| 56758 | 9.59  | 0.06 | 10.00 | 0.03 | 11.07 | 0.23 | 1.330 up   | 2.799 up   | 0.00 | 54.97  | unknown protein                                                                   |
| 56819 | 12.28 | 0.08 | 10.93 | 0.05 | 10.51 | 0.40 | 2.546 down | 3.415 down | 0.01 | 21.51  | glutathione-S-transferase                                                         |
| 56830 | 11.98 | 0.05 | 10.99 | 0.06 | 10.69 | 0.35 | 1.988 down | 2.437 down | 0.01 | 15.20  | dipeptidyl peptidase 5                                                            |
| 56831 | 11.38 | 0.07 | 11.70 | 0.15 | 12.45 | 0.19 | 1.247 up   | 2.100 up   | 0.00 | 31.92  | Co-chaperone Hsc20                                                                |
| 56840 | 9.02  | 0.01 | 6.32  | 0.14 | 11.77 | 0.62 | 6.499 down | 6.709 up   | 0.00 | 86.62  | unknown protein                                                                   |
| 56853 | 10.35 | 0.02 | 9.27  | 0.15 | 8.38  | 0.58 | 2.107 down | 3.913 down | 0.02 | 12.60  | unknown protein                                                                   |
| 56860 | 11.21 | 0.01 | 10.24 | 0.00 | 9.37  | 0.31 | 1.964 down | 3.588 down | 0.00 | 39.91  | unknown protein                                                                   |
| 56863 | 13.75 | 0.06 | 11.13 | 0.12 | 12.07 | 0.16 | 6.161 down | 3.218 down | 0.00 | 178.66 | unknown protein                                                                   |
| 56894 | 2.88  | 0.23 | 3.09  | 0.17 | 4.26  | 0.10 | 1.156 up   | 2.606 up   | 0.00 | 72.96  | GH18 chitinase CHI18-10                                                           |
| 56996 | 4.93  | 0.29 | 4.85  | 0.10 | 8.93  | 0.21 | 1.054 down | 15.988 up  | 0.00 | 362.01 | GH5 $\beta$ -Mannanase MAN1                                                       |
| 57002 | 12.41 | 0.18 | 12.07 | 0.24 | 10.88 | 0.24 | 1.266 down | 2.875 down | 0.00 | 35.74  | unknown protein                                                                   |
| 57008 | 5.24  | 0.40 | 5.55  | 0.15 | 6.96  | 0.49 | 1.238 up   | 3.284 up   | 0.02 | 13.77  | unknown protein                                                                   |
| 57045 | 7.48  | 0.45 | 6.61  | 0.00 | 6.40  | 0.25 | 1.818 down | 2.101 down | 0.03 | 9.96   | unknown protein                                                                   |
| 57049 | 12.79 | 0.04 | 12.13 | 0.01 | 11.52 | 0.31 | 1.578 down | 2.408 down | 0.01 | 19.50  | tRNA selenocysteine-associated protein 1                                          |
| 57101 | 4.84  | 0.35 | 5.41  | 0.36 | 6.73  | 0.15 | 1.475 up   | 3.705 up   | 0.00 | 42.76  | PTH11 GPCR                                                                        |
| 57112 | 9.08  | 0.17 | 8.87  | 0.10 | 7.80  | 0.41 | 1.156 down | 2.420 down | 0.02 | 12.86  | HET and Ankyrin domain protein                                                    |
| 57128 | 12.17 | 0.14 | 11.50 | 0.05 | 10.93 | 0.29 | 1.584 down | 2.356 down | 0.01 | 18.68  | GH13 glycogen debranching enzyme                                                  |
| 57179 | 5.10  | 0.27 | 5.27  | 0.06 | 8.18  | 0.57 | 1.125 up   | 8.449 up   | 0.00 | 42.77  | GH105/GH88 glycosyl hydrolase                                                     |
| 57185 | 7.09  | 0.18 | 9.06  | 0.15 | 8.36  | 0.64 | 3.912 up   | 2.408 up   | 0.04 | 7.87   | Amino acid transporters                                                           |
| 57198 | 10.39 | 0.09 | 9.74  | 0.19 | 8.55  | 0.27 | 1.567 down | 3.568 down | 0.00 | 47.77  | Rad10                                                                             |
| 57286 | 8.85  | 0.11 | 9.96  | 0.19 | 10.10 | 0.38 | 2.161 up   | 2.381 up   | 0.02 | 11.46  | unknown protein                                                                   |
| 57322 | 11.88 | 0.01 | 11.87 | 0.00 | 10.31 | 0.48 | 1.005 down | 2.955 down | 0.01 | 17.36  | ARO Transcriptional regulators containing a DNA-binding HTH domain and an aminotr |
| 57357 | 8.69  | 0.11 | 8.86  | 0.07 | 10.10 | 0.29 | 1.124 up   | 2.654 up   | 0.00 | 32.22  | Glycine cleavage T protein (aminomethyl transferase). putative                    |
| 57383 | 8.82  | 0.01 | 7.94  | 0.14 | 7.53  | 0.19 | 1.846 down | 2.443 down | 0.00 | 43.71  | unknown protein                                                                   |
| 57397 | 6.76  | 0.18 | 7.98  | 0.11 | 8.28  | 0.42 | 2.316 up   | 2.850 up   | 0.02 | 13.47  | unknown protein                                                                   |
| 57433 | 3.24  | 0.01 | 3.19  | 0.16 | 4.63  | 0.05 | 1.035 down | 2.620 up   | 0.00 | 299.84 | Peptidase S8 and S53. subtilisin. kexin. sedolisin                                |
| 57465 | 12.29 | 0.03 | 12.19 | 0.10 | 11.13 | 0.13 | 1.074 down | 2.235 down | 0.00 | 104.32 | Vsp9 domain protein                                                               |

|       |       |      |       |      |       |      |            |             |      |        |                                                                                      |
|-------|-------|------|-------|------|-------|------|------------|-------------|------|--------|--------------------------------------------------------------------------------------|
| 57488 | 12.93 | 0.18 | 12.73 | 0.02 | 11.70 | 0.26 | 1.149 down | 2.350 down  | 0.01 | 27.75  | Top3 gene                                                                            |
| 57524 | 12.44 | 0.12 | 12.02 | 0.05 | 11.39 | 0.18 | 1.336 down | 2.065 down  | 0.00 | 35.65  | amidohydrolase 2                                                                     |
| 57526 | 9.65  | 0.09 | 6.60  | 0.04 | 7.15  | 0.17 | 8.271 down | 5.647 down  | 0.00 | 291.59 | GPCR. mating type pheromone G-protein coupled receptor                               |
| 57527 | 10.16 | 0.18 | 10.12 | 0.01 | 8.47  | 0.22 | 1.029 down | 3.217 down  | 0.00 | 78.91  | unknown protein                                                                      |
| 57537 | 11.64 | 0.03 | 12.02 | 0.23 | 12.78 | 0.21 | 1.299 up   | 2.213 up    | 0.01 | 27.11  | unknown protein                                                                      |
| 57555 | 9.34  | 0.06 | 7.89  | 0.07 | 7.60  | 0.63 | 2.737 down | 3.347 down  | 0.04 | 8.66   | cytochrome P450 monooxygenase                                                        |
| 57568 | 13.46 | 0.09 | 13.41 | 0.01 | 12.24 | 0.33 | 1.042 down | 2.344 down  | 0.01 | 21.32  | unknown protein                                                                      |
| 57575 | 4.83  | 0.22 | 5.06  | 0.44 | 6.37  | 0.39 | 1.168 up   | 2.904 up    | 0.02 | 14.45  | unknown protein                                                                      |
| 57592 | 11.76 | 0.08 | 11.74 | 0.00 | 10.51 | 0.15 | 1.009 down | 2.373 down  | 0.00 | 100.45 | unknown protein                                                                      |
| 57603 | 12.83 | 0.22 | 12.30 | 0.03 | 11.76 | 0.08 | 1.449 down | 2.098 down  | 0.00 | 58.36  | unknown protein                                                                      |
| 57643 | 10.95 | 0.09 | 10.15 | 0.22 | 6.73  | 0.26 | 1.743 down | 18.548 down | 0.00 | 285.83 | unknown protein                                                                      |
| 57735 | 12.87 | 0.02 | 12.39 | 0.05 | 11.85 | 0.24 | 1.398 down | 2.025 down  | 0.01 | 20.26  | GATA type transcriptional regulator                                                  |
| 57749 | 10.71 | 0.10 | 9.68  | 0.10 | 8.80  | 0.43 | 2.035 down | 3.764 down  | 0.01 | 21.78  | MFS permease                                                                         |
| 57760 | 11.59 | 0.03 | 11.16 | 0.09 | 10.05 | 0.22 | 1.349 down | 2.915 down  | 0.00 | 61.82  | Zn2Cys6 transcriptional regulator                                                    |
| 57860 | 11.60 | 0.02 | 11.40 | 0.05 | 9.77  | 0.15 | 1.153 down | 3.578 down  | 0.00 | 225.07 | Multicopper oxidases                                                                 |
| 57865 | 7.75  | 0.20 | 8.10  | 0.14 | 9.24  | 0.21 | 1.281 up   | 2.816 up    | 0.00 | 46.53  | unknown protein                                                                      |
| 57868 | 8.31  | 0.03 | 9.60  | 0.04 | 9.35  | 0.19 | 2.442 up   | 2.062 up    | 0.00 | 42.56  | Delta 1-pyrroline-5-carboxylate reductase                                            |
| 57870 | 10.16 | 0.03 | 11.42 | 0.18 | 11.80 | 0.28 | 2.398 up   | 3.119 up    | 0.00 | 34.63  | histone H3                                                                           |
| 57891 | 12.23 | 0.02 | 12.12 | 0.09 | 11.10 | 0.11 | 1.078 down | 2.186 down  | 0.00 | 125.15 | actinin actin binding and calcium-binding EF-hand domains                            |
| 57914 | 11.52 | 0.03 | 11.73 | 0.17 | 7.31  | 0.29 | 1.158 up   | 18.424 down | 0.00 | 333.80 | Esterase/lipase/thioesterase                                                         |
| 57965 | 12.25 | 0.02 | 12.49 | 0.02 | 11.11 | 0.10 | 1.179 up   | 2.203 down  | 0.00 | 258.03 | DSBA family oxidoreductase. putative                                                 |
| 57975 | 7.05  | 0.29 | 7.90  | 0.03 | 8.78  | 0.20 | 1.804 up   | 3.326 up    | 0.00 | 52.08  | phospholipase C. related to Aspergillus fumigatus phosphatidylinositol phospholipase |
| 58016 | 5.03  | 0.31 | 5.53  | 0.33 | 6.67  | 0.09 | 1.417 up   | 3.118 up    | 0.00 | 43.99  | unknown protein                                                                      |
| 58026 | 10.53 | 0.13 | 10.41 | 0.25 | 9.10  | 0.28 | 1.086 down | 2.694 down  | 0.00 | 29.50  | glutathione S-transferase domain-containing protein                                  |
| 58051 | 10.50 | 0.06 | 10.03 | 0.08 | 9.12  | 0.30 | 1.387 down | 2.606 down  | 0.01 | 25.60  | unknown protein                                                                      |
| 58130 | 12.99 | 0.00 | 12.35 | 0.01 | 11.82 | 0.06 | 1.563 down | 2.246 down  | 0.00 | 384.56 | bHLH transcriptional regulator                                                       |
| 58227 | 5.12  | 0.25 | 6.29  | 0.30 | 7.12  | 0.31 | 2.248 up   | 4.000 up    | 0.00 | 30.50  | GCN5-related acetyltransferase                                                       |
| 58229 | 11.11 | 0.12 | 12.20 | 0.01 | 12.13 | 0.08 | 2.134 up   | 2.030 up    | 0.00 | 120.50 | Ubiquitin-like protein (HubA)                                                        |
| 58244 | 11.80 | 0.22 | 10.88 | 0.00 | 9.61  | 0.27 | 1.892 down | 4.551 down  | 0.00 | 62.91  | unknown protein                                                                      |
| 58264 | 9.47  | 0.00 | 10.27 | 0.15 | 10.83 | 0.09 | 1.747 up   | 2.575 up    | 0.00 | 132.85 | paxU orthologue ? (indole-terpene biosynthesis?)                                     |

|       |       |      |       |      |       |      |             |             |      |        |                                                                                    |
|-------|-------|------|-------|------|-------|------|-------------|-------------|------|--------|------------------------------------------------------------------------------------|
| 58267 | 9.48  | 0.08 | 9.99  | 0.11 | 11.07 | 0.12 | 1.428 up    | 3.018 up    | 0.00 | 161.89 | tRNA-dihydrouridine synthase.                                                      |
| 58285 | 7.34  | 0.13 | 6.36  | 0.25 | 6.28  | 0.24 | 1.981 down  | 2.096 down  | 0.01 | 16.42  | PKS-NRPS                                                                           |
| 58296 | 3.94  | 0.02 | 4.09  | 0.05 | 5.36  | 0.34 | 1.107 up    | 2.676 up    | 0.01 | 26.87  | MFS permease                                                                       |
| 58333 | 8.23  | 0.13 | 7.63  | 0.13 | 7.04  | 0.20 | 1.519 down  | 2.281 down  | 0.00 | 32.69  | FAD binding protein                                                                |
| 58366 | 3.84  | 0.14 | 3.48  | 0.11 | 5.40  | 0.33 | 1.280 down  | 2.944 up    | 0.00 | 42.64  | AAA+-type ATPase                                                                   |
| 58370 | 10.26 | 0.11 | 9.36  | 0.08 | 9.03  | 0.18 | 1.865 down  | 2.339 down  | 0.00 | 43.72  | mtDNA repair protein                                                               |
| 58387 | 11.13 | 0.16 | 10.80 | 0.03 | 9.92  | 0.09 | 1.261 down  | 2.312 down  | 0.00 | 108.01 | proline iminopeptidase                                                             |
| 58412 | 7.15  | 0.34 | 5.26  | 0.33 | 5.35  | 0.15 | 3.697 down  | 3.471 down  | 0.00 | 42.07  | AdhP Zn-dependent alcohol dehydrogenases                                           |
| 58431 | 3.82  | 0.50 | 4.30  | 0.05 | 5.38  | 0.17 | 1.400 up    | 2.947 up    | 0.01 | 27.42  | unknown protein                                                                    |
| 58450 | 4.42  | 0.15 | 4.65  | 0.28 | 5.65  | 0.31 | 1.176 up    | 2.349 up    | 0.01 | 16.02  | GH3 $\beta$ -xylosidase XYL3b                                                      |
| 58456 | 11.87 | 0.09 | 8.66  | 0.14 | 9.45  | 0.19 | 9.297 down  | 5.379 down  | 0.00 | 210.31 | Zn2Cys6 transcriptional regulator                                                  |
| 58479 | 7.77  | 0.19 | 7.26  | 0.02 | 6.02  | 0.29 | 1.418 down  | 3.365 down  | 0.00 | 41.47  | short chain dehydrogenase/reductase                                                |
| 58492 | 9.80  | 0.05 | 10.28 | 0.30 | 10.94 | 0.43 | 1.397 up    | 2.204 up    | 0.05 | 7.08   | unknown protein                                                                    |
| 58509 | 9.51  | 0.16 | 9.80  | 0.08 | 8.29  | 0.18 | 1.223 up    | 2.335 down  | 0.00 | 72.71  | DNA ligase IV involved in non-homologous end joining of double-strand DNA breaks   |
| 58511 | 12.34 | 0.15 | 10.58 | 0.09 | 9.00  | 0.31 | 3.383 down  | 10.118 down | 0.00 | 117.99 | amino acid permease (GABA)                                                         |
| 58521 | 3.48  | 0.09 | 3.69  | 0.07 | 5.32  | 0.33 | 1.160 up    | 3.571 up    | 0.00 | 43.52  | SAM (and some other nucleotide) binding motif                                      |
| 58525 | 9.95  | 0.05 | 8.46  | 0.05 | 8.21  | 0.36 | 2.797 down  | 3.337 down  | 0.01 | 26.49  | unknown protein                                                                    |
| 58535 | 3.48  | 0.18 | 4.04  | 0.12 | 6.53  | 0.32 | 1.475 up    | 8.270 up    | 0.00 | 108.76 | unknown protein                                                                    |
| 58560 | 10.20 | 0.14 | 9.89  | 0.05 | 9.13  | 0.34 | 1.242 down  | 2.103 down  | 0.02 | 12.11  | MFS monocarboxylate transporter                                                    |
| 58563 | 4.47  | 0.16 | 4.48  | 0.16 | 5.52  | 0.17 | 1.004 up    | 2.070 up    | 0.00 | 40.40  | oxalate decarboxylase                                                              |
| 58574 | 5.98  | 0.48 | 6.11  | 0.10 | 7.36  | 0.49 | 1.092 up    | 2.601 up    | 0.03 | 9.18   | unknown protein                                                                    |
| 58601 | 3.29  | 0.08 | 2.96  | 0.02 | 5.25  | 0.14 | 1.251 down  | 3.900 up    | 0.00 | 345.05 | unknown protein                                                                    |
| 58603 | 9.61  | 0.06 | 9.71  | 0.04 | 11.84 | 0.19 | 1.070 up    | 4.702 up    | 0.00 | 207.27 | unknown protein. contains Splecktrin motif                                         |
| 58634 | 11.64 | 0.04 | 11.05 | 0.06 | 9.92  | 0.15 | 1.499 down  | 3.290 down  | 0.00 | 152.86 | Zn2Cys6 Fungal transcriptional regulator                                           |
| 58639 | 11.60 | 0.07 | 8.20  | 0.08 | 10.23 | 0.26 | 10.563 down | 2.584 down  | 0.00 | 141.20 | unknown protein                                                                    |
| 58640 | 9.82  | 0.01 | 10.42 | 0.32 | 11.39 | 0.26 | 1.516 up    | 2.972 up    | 0.00 | 29.24  | unknown protein                                                                    |
| 58651 | 8.26  | 0.32 | 8.14  | 0.35 | 9.64  | 0.07 | 1.084 down  | 2.597 up    | 0.00 | 43.37  | adenylosuccinate synthase                                                          |
| 58675 | 7.64  | 0.15 | 6.98  | 0.24 | 5.59  | 0.57 | 1.577 down  | 4.152 down  | 0.01 | 15.22  | short chain dehydrogenase/reductase                                                |
| 58689 | 8.40  | 0.18 | 8.05  | 0.11 | 6.96  | 0.28 | 1.277 down  | 2.717 down  | 0.00 | 30.31  | ERG5 C-22 sterol desaturase. a cytochrome P450 enzyme that catalyzes the formation |
| 58694 | 10.65 | 0.02 | 9.88  | 0.12 | 9.49  | 0.26 | 1.700 down  | 2.232 down  | 0.01 | 21.30  | unknown protein                                                                    |

|       |       |      |       |      |       |      |             |            |      |         |                                            |
|-------|-------|------|-------|------|-------|------|-------------|------------|------|---------|--------------------------------------------|
| 58699 | 8.44  | 0.04 | 7.69  | 0.03 | 7.15  | 0.15 | 1.682 down  | 2.440 down | 0.00 | 78.86   | unknown protein                            |
| 58734 | 11.64 | 0.12 | 12.11 | 0.05 | 13.27 | 0.10 | 1.390 up    | 3.106 up   | 0.00 | 212.09  | prefoldin subunit 2                        |
| 58746 | 11.67 | 0.13 | 11.25 | 0.05 | 10.30 | 0.28 | 1.343 down  | 2.596 down | 0.00 | 28.58   | unknown protein                            |
| 58823 | 5.99  | 0.02 | 6.60  | 0.18 | 7.41  | 0.48 | 1.531 up    | 2.674 up   | 0.03 | 9.91    | MRSP1/expansin-like                        |
| 58837 | 11.76 | 0.07 | 11.11 | 0.19 | 10.33 | 0.12 | 1.566 down  | 2.698 down | 0.00 | 84.39   | unknown protein                            |
| 58848 | 5.62  | 0.12 | 5.23  | 0.14 | 6.97  | 0.44 | 1.314 down  | 2.539 up   | 0.01 | 20.27   | unknown protein                            |
| 58853 | 8.05  | 0.04 | 9.62  | 0.11 | 12.30 | 0.11 | 2.977 up    | 19.052 up  | 0.00 | 1288.61 | Homeodomain-like                           |
| 58880 | 3.72  | 0.11 | 3.66  | 0.19 | 6.13  | 0.25 | 1.041 down  | 5.309 up   | 0.00 | 122.25  | MRSP1/expansin-like                        |
| 58887 | 3.38  | 0.12 | 3.19  | 0.16 | 4.86  | 0.11 | 1.134 down  | 2.799 up   | 0.00 | 157.84  | GH78 $\alpha$ -L-rhamnosidase              |
| 58897 | 13.35 | 0.04 | 12.76 | 0.08 | 11.55 | 0.08 | 1.497 down  | 3.468 down | 0.00 | 494.37  | C2H2 transcriptional regulator             |
| 58952 | 5.80  | 0.25 | 5.17  | 0.09 | 4.73  | 0.12 | 1.547 down  | 2.103 down | 0.00 | 32.45   | calcium transporting ATPase. ion pump      |
| 58990 | 8.94  | 0.13 | 9.51  | 0.06 | 10.01 | 0.23 | 1.491 up    | 2.112 up   | 0.01 | 22.78   | v-SNARE Bos1. ER-Golgi                     |
| 59028 | 6.69  | 0.03 | 7.71  | 0.05 | 9.02  | 0.26 | 2.016 up    | 4.997 up   | 0.00 | 92.48   | unknown protein                            |
| 59050 | 3.13  | 0.25 | 2.84  | 0.13 | 6.41  | 0.83 | 1.216 down  | 9.714 up   | 0.01 | 27.29   | Ankyrin                                    |
| 59053 | 12.54 | 0.20 | 12.33 | 0.05 | 11.34 | 0.16 | 1.156 down  | 2.291 down | 0.00 | 53.14   | Adenosine/AMP deaminase                    |
| 59065 | 4.17  | 0.24 | 4.59  | 0.01 | 5.63  | 0.20 | 1.339 up    | 2.752 up   | 0.00 | 47.64   | unknown protein                            |
| 59067 | 9.94  | 0.08 | 10.18 | 0.09 | 11.20 | 0.17 | 1.180 up    | 2.397 up   | 0.00 | 65.44   | Zn2Cys6 transcriptional regulator          |
| 59073 | 9.73  | 0.06 | 9.58  | 0.00 | 8.58  | 0.24 | 1.110 down  | 2.213 down | 0.00 | 34.08   | unknown protein                            |
| 59081 | 3.17  | 0.11 | 3.27  | 0.00 | 4.83  | 0.13 | 1.066 up    | 3.150 up   | 0.00 | 200.10  | CsdB Selenocysteine lyase                  |
| 59151 | 14.30 | 0.21 | 10.21 | 0.17 | 12.06 | 0.29 | 17.018 down | 4.712 down | 0.00 | 128.31  | SSCRP                                      |
| 59188 | 10.60 | 0.15 | 10.93 | 0.19 | 8.50  | 0.22 | 1.257 up    | 4.261 down | 0.00 | 126.19  | unknown protein                            |
| 59190 | 9.99  | 0.16 | 9.30  | 0.16 | 8.51  | 0.23 | 1.614 down  | 2.775 down | 0.00 | 35.46   | MFS permease                               |
| 59196 | 7.52  | 0.11 | 8.59  | 0.00 | 9.54  | 0.53 | 2.101 up    | 4.067 up   | 0.01 | 16.18   | short chain dehydrogenase/reductase        |
| 59234 | 10.43 | 0.02 | 10.02 | 0.27 | 8.45  | 0.49 | 1.330 down  | 3.943 down | 0.01 | 20.24   | Zn2Cys6 transcriptional regulator          |
| 59244 | 3.98  | 0.21 | 4.09  | 0.05 | 6.00  | 0.54 | 1.079 up    | 4.037 up   | 0.01 | 20.86   | metalloprotease. putative                  |
| 59272 | 9.49  | 0.05 | 9.10  | 0.37 | 7.89  | 0.33 | 1.314 down  | 3.044 down | 0.01 | 22.28   | MFS permease                               |
| 59315 | 7.45  | 0.06 | 8.24  | 0.08 | 6.20  | 0.21 | 1.723 up    | 2.386 down | 0.00 | 105.73  | PKS                                        |
| 59322 | 9.45  | 0.06 | 8.23  | 0.13 | 6.90  | 0.33 | 2.327 down  | 5.863 down | 0.00 | 63.76   | Zinc-binding oxidoreductase                |
| 59333 | 2.96  | 0.12 | 3.24  | 0.16 | 4.97  | 0.46 | 1.215 up    | 4.018 up   | 0.01 | 26.13   | MFS permease                               |
| 59351 | 7.22  | 0.24 | 5.80  | 0.07 | 5.29  | 0.20 | 2.679 down  | 3.796 down | 0.00 | 68.48   | 1-aminocyclopropane-1-carboxylate synthase |

|       |       |      |       |      |       |      |             |             |      |         |                                                              |
|-------|-------|------|-------|------|-------|------|-------------|-------------|------|---------|--------------------------------------------------------------|
| 59352 | 10.50 | 0.02 | 9.77  | 0.11 | 8.63  | 0.70 | 1.659 down  | 3.656 down  | 0.04 | 8.47    | cytochrome P450                                              |
| 59353 | 9.10  | 0.12 | 9.39  | 0.01 | 7.82  | 0.36 | 1.228 up    | 2.423 down  | 0.01 | 25.14   | Zn2Cys6 transcriptional regulator                            |
| 59354 | 9.52  | 0.08 | 8.52  | 0.04 | 7.91  | 0.25 | 2.000 down  | 3.047 down  | 0.00 | 45.72   | Zn2Cys6 transcriptional regulator                            |
| 59364 | 13.68 | 0.06 | 9.67  | 0.31 | 9.01  | 0.22 | 16.146 down | 25.526 down | 0.00 | 306.55  | Sexual differentiation process protein ISP4                  |
| 59368 | 8.63  | 0.10 | 11.15 | 0.14 | 13.71 | 0.19 | 5.742 up    | 33.950 up   | 0.00 | 640.15  | unknown protein. Duf341                                      |
| 59372 | 8.22  | 0.02 | 3.77  | 0.10 | 6.25  | 0.09 | 21.869 down | 3.935 down  | 0.00 | 1530.25 | unknown protein                                              |
| 59381 | 11.06 | 0.02 | 10.38 | 0.10 | 8.26  | 0.30 | 1.602 down  | 6.982 down  | 0.00 | 110.68  | SAM-dependent methyltransferases                             |
| 59382 | 11.81 | 0.09 | 11.10 | 0.22 | 8.60  | 0.30 | 1.643 down  | 9.290 down  | 0.00 | 126.32  | unknown protein                                              |
| 59391 | 10.26 | 0.06 | 10.21 | 0.05 | 7.97  | 0.53 | 1.035 down  | 4.898 down  | 0.00 | 30.35   | GH27 $\alpha$ -galactosidase                                 |
| 59396 | 5.91  | 0.03 | 5.58  | 0.03 | 7.20  | 0.61 | 1.260 down  | 2.444 up    | 0.03 | 9.64    | unknown protein                                              |
| 59482 | 9.72  | 0.01 | 11.14 | 0.01 | 12.11 | 0.51 | 2.690 up    | 5.271 up    | 0.01 | 25.01   | PKS                                                          |
| 59491 | 8.79  | 0.11 | 8.05  | 0.06 | 6.17  | 0.12 | 1.664 down  | 6.146 down  | 0.00 | 452.69  | unknown protein                                              |
| 59508 | 4.71  | 0.08 | 4.18  | 0.40 | 5.92  | 0.32 | 1.443 down  | 2.313 up    | 0.01 | 24.23   | dipeptidyl peptidase 5                                       |
| 59515 | 9.24  | 0.02 | 10.57 | 0.06 | 11.04 | 0.25 | 2.504 up    | 3.481 up    | 0.00 | 56.31   | MFS permease                                                 |
| 59546 | 11.91 | 0.06 | 11.38 | 0.13 | 10.83 | 0.40 | 1.441 down  | 2.105 down  | 0.04 | 8.09    | Zn2Cys6 transcriptional regulator                            |
| 59582 | 3.67  | 0.11 | 4.21  | 0.12 | 5.32  | 0.35 | 1.451 up    | 3.142 up    | 0.01 | 26.41   | unknown protein                                              |
| 59584 | 10.15 | 0.01 | 10.87 | 0.19 | 11.58 | 0.53 | 1.644 up    | 2.685 up    | 0.04 | 8.09    | unknown protein                                              |
| 59597 | 4.17  | 0.03 | 4.47  | 0.16 | 5.69  | 0.09 | 1.231 up    | 2.859 up    | 0.00 | 180.21  | unknown protein                                              |
| 59598 | 11.81 | 0.05 | 10.90 | 0.09 | 9.72  | 0.17 | 1.883 down  | 4.278 down  | 0.00 | 161.81  | unknown protein                                              |
| 59609 | 12.56 | 0.13 | 12.57 | 0.01 | 11.43 | 0.33 | 1.007 up    | 2.188 down  | 0.01 | 18.74   | unknown protein                                              |
| 59628 | 6.60  | 0.38 | 7.02  | 0.28 | 8.66  | 0.29 | 1.342 up    | 4.185 up    | 0.00 | 36.47   | unknown protein                                              |
| 59642 | 11.29 | 0.09 | 11.01 | 0.15 | 9.51  | 0.39 | 1.211 down  | 3.427 down  | 0.01 | 27.73   | $\alpha/\beta$ hydrolase lipase/epoxide hydrolase            |
| 59649 | 8.47  | 0.04 | 8.65  | 0.01 | 6.51  | 0.27 | 1.129 up    | 3.892 down  | 0.00 | 95.16   | Zinc-containing alcohol dehydrogenase                        |
| 59665 | 10.19 | 0.06 | 10.14 | 0.10 | 8.87  | 0.32 | 1.031 down  | 2.486 down  | 0.01 | 25.76   | unknown protein                                              |
| 59669 | 10.53 | 0.14 | 10.64 | 0.10 | 9.41  | 0.20 | 1.081 up    | 2.171 down  | 0.00 | 44.92   | extracellular salicylate hydroxylase/monooxygenase. putative |
| 59689 | 9.46  | 0.12 | 9.18  | 0.02 | 8.18  | 0.23 | 1.219 down  | 2.438 down  | 0.00 | 39.28   | GH2 $\beta$ -mannosidase                                     |
| 59690 | 3.08  | 0.31 | 2.91  | 0.24 | 4.86  | 0.13 | 1.119 down  | 3.442 up    | 0.00 | 83.95   | unknown protein                                              |
| 59726 | 2.84  | 0.02 | 2.93  | 0.00 | 5.25  | 0.09 | 1.062 up    | 5.297 up    | 0.00 | 1077.63 | DNA photolyase. N-terminal. class 1. FAD-binding             |
| 59740 | 9.36  | 0.13 | 8.98  | 0.01 | 7.55  | 0.18 | 1.298 down  | 3.502 down  | 0.00 | 114.38  | transcriptional regulator. unknown                           |
| 59746 | 9.24  | 0.04 | 9.03  | 0.01 | 7.55  | 0.17 | 1.158 down  | 3.233 down  | 0.00 | 148.83  | oxaloacetase-like protein                                    |



|       |       |      |       |      |       |      |            |            |      |        |                                                                          |
|-------|-------|------|-------|------|-------|------|------------|------------|------|--------|--------------------------------------------------------------------------|
| 59747 | 13.01 | 0.05 | 12.51 | 0.20 | 11.61 | 0.24 | 1.417 down | 2.643 down | 0.00 | 32.98  | Rho GTPase-activating protein involved in signal transduction mechanisms |
| 59751 | 11.25 | 0.03 | 10.68 | 0.19 | 10.18 | 0.26 | 1.475 down | 2.093 down | 0.01 | 16.20  | Ribonucleases P/MRP protein subunit POP1 containing protein              |
| 59763 | 5.92  | 0.03 | 7.41  | 0.01 | 7.98  | 0.19 | 2.804 up   | 4.151 up   | 0.00 | 128.55 | unknown protein                                                          |
| 59770 | 10.49 | 0.12 | 9.88  | 0.12 | 8.59  | 0.16 | 1.525 down | 3.754 down | 0.00 | 131.69 | aryl-alcohol dehydrogenases                                              |
| 59778 | 12.93 | 0.13 | 12.79 | 0.02 | 10.38 | 0.31 | 1.104 down | 5.861 down | 0.00 | 101.79 | GPCR. related to A nidulans GprC                                         |
| 59791 | 2.72  | 0.05 | 2.91  | 0.02 | 5.03  | 0.42 | 1.143 up   | 4.978 up   | 0.00 | 46.91  | GH18. chitinase CHI18-15                                                 |
| 59796 | 12.70 | 0.05 | 12.21 | 0.02 | 11.57 | 0.09 | 1.407 down | 2.193 down | 0.00 | 162.81 | MFS permease                                                             |
| 59801 | 7.65  | 0.13 | 7.54  | 0.03 | 9.29  | 0.27 | 1.082 down | 3.116 up   | 0.00 | 62.35  | unknown protein                                                          |
| 59827 | 8.93  | 0.18 | 9.60  | 0.04 | 11.11 | 0.11 | 1.592 up   | 4.546 up   | 0.00 | 256.44 | unknown protein                                                          |
| 59833 | 11.55 | 0.02 | 10.42 | 0.02 | 9.97  | 0.26 | 2.185 down | 2.973 down | 0.00 | 40.48  | unknown protein                                                          |
| 59843 | 9.38  | 0.07 | 9.54  | 0.22 | 8.05  | 0.31 | 1.113 up   | 2.512 down | 0.00 | 29.40  | AMP-dependent synthetase and ligase. acetoacetyl-CoA synthase-like       |
| 59876 | 4.91  | 0.56 | 4.48  | 0.20 | 7.32  | 1.08 | 1.341 down | 5.318 up   | 0.03 | 9.07   | xenobiotic compound monounknown proteingenase. DszA family               |
| 59887 | 8.48  | 0.38 | 6.05  | 0.32 | 6.37  | 0.16 | 5.385 down | 4.318 down | 0.00 | 58.83  | L-lactate dehydrogenase. putative                                        |
| 59936 | 9.18  | 0.01 | 9.86  | 0.24 | 10.54 | 0.22 | 1.599 up   | 2.570 up   | 0.00 | 30.80  | unknown protein                                                          |
| 59940 | 12.05 | 0.09 | 10.15 | 0.17 | 10.43 | 0.51 | 3.732 down | 3.082 down | 0.02 | 13.95  | unknown protein                                                          |
| 59952 | 8.96  | 0.08 | 10.04 | 0.25 | 6.58  | 0.28 | 2.117 up   | 5.176 down | 0.00 | 148.78 | Amino acid transporter PotE                                              |
| 60004 | 12.02 | 0.20 | 11.60 | 0.23 | 10.61 | 0.28 | 1.338 down | 2.648 down | 0.01 | 23.70  | Zn2Cys6 transcriptional regulator                                        |
| 60028 | 3.54  | 0.28 | 3.37  | 0.13 | 5.22  | 0.24 | 1.122 down | 3.193 up   | 0.00 | 58.73  | unknown protein                                                          |
| 60052 | 10.16 | 0.02 | 9.23  | 0.17 | 8.07  | 0.08 | 1.895 down | 4.237 down | 0.00 | 310.61 | short chain dehydrogenase/reductase                                      |
| 60116 | 13.65 | 0.08 | 12.95 | 0.13 | 10.50 | 0.54 | 1.630 down | 8.900 down | 0.00 | 45.58  | MRP-type ABC transporter                                                 |
| 60144 | 3.73  | 0.37 | 3.78  | 0.30 | 6.18  | 0.91 | 1.036 up   | 5.498 up   | 0.02 | 11.01  | Amino acid transporters                                                  |
| 60182 | 3.68  | 0.65 | 2.68  | 0.17 | 4.94  | 0.21 | 1.995 down | 2.394 up   | 0.00 | 30.63  | unknown protein                                                          |
| 60187 | 7.16  | 0.03 | 6.88  | 0.01 | 5.97  | 0.14 | 1.217 down | 2.281 down | 0.00 | 93.56  | enoyl-CoA hydratase/isomerase                                            |
| 60194 | 10.74 | 0.02 | 10.07 | 0.27 | 9.62  | 0.23 | 1.588 down | 2.163 down | 0.01 | 17.54  | phosphatidylinositol-specific phospholipase C (MPLC1)                    |
| 60232 | 10.82 | 0.00 | 11.12 | 0.11 | 9.26  | 0.24 | 1.226 up   | 2.958 down | 0.00 | 83.82  | unknown protein                                                          |
| 60270 | 12.04 | 0.01 | 11.59 | 0.02 | 10.90 | 0.12 | 1.362 down | 2.202 down | 0.00 | 114.22 | unknown protein                                                          |
| 60282 | 12.04 | 0.01 | 11.64 | 0.14 | 10.70 | 0.20 | 1.318 down | 2.532 down | 0.00 | 49.07  | Zn2Cys6 transcriptional regulator                                        |
| 60328 | 9.38  | 0.09 | 9.00  | 0.32 | 7.77  | 0.18 | 1.299 down | 3.043 down | 0.00 | 50.46  | unknown protein                                                          |
| 60337 | 6.92  | 0.03 | 4.09  | 0.42 | 5.37  | 0.21 | 7.097 down | 2.932 down | 0.00 | 63.70  | unknown protein                                                          |
| 60352 | 9.49  | 0.05 | 7.87  | 0.24 | 7.24  | 0.51 | 3.078 down | 4.788 down | 0.01 | 20.45  | NADH-dehydrogenase (ubiquinone)                                          |

|       |       |      |       |      |       |      |             |            |      |        |                                                                                    |
|-------|-------|------|-------|------|-------|------|-------------|------------|------|--------|------------------------------------------------------------------------------------|
| 60370 | 11.50 | 0.16 | 9.04  | 0.03 | 9.83  | 0.41 | 5.514 down  | 3.175 down | 0.00 | 29.72  | unknown protein                                                                    |
| 60378 | 7.71  | 0.17 | 9.13  | 0.18 | 6.60  | 0.39 | 2.670 up    | 2.164 down | 0.00 | 42.54  | AAA ATPase                                                                         |
| 60418 | 4.81  | 0.09 | 5.35  | 0.10 | 6.31  | 0.36 | 1.458 up    | 2.832 up   | 0.01 | 20.38  | Aldehyde dehydrogenase                                                             |
| 60419 | 4.91  | 0.18 | 4.90  | 0.13 | 6.42  | 0.20 | 1.005 down  | 2.848 up   | 0.00 | 65.69  | acid phosphatase. putative                                                         |
| 60422 | 10.55 | 0.13 | 9.08  | 0.14 | 9.02  | 0.32 | 2.764 down  | 2.876 down | 0.01 | 24.60  | unknown protein                                                                    |
| 60445 | 11.42 | 0.08 | 9.64  | 0.02 | 8.23  | 0.35 | 3.424 down  | 9.081 down | 0.00 | 90.72  | unknown protein                                                                    |
| 60456 | 11.12 | 0.06 | 11.32 | 0.12 | 10.03 | 0.13 | 1.149 up    | 2.137 down | 0.00 | 105.59 | unknown protein                                                                    |
| 60489 | 11.14 | 0.02 | 9.73  | 0.12 | 12.34 | 0.39 | 2.666 down  | 2.296 up   | 0.00 | 49.05  | CE5 cutinase                                                                       |
| 60490 | 10.90 | 0.10 | 11.05 | 0.13 | 9.80  | 0.15 | 1.104 up    | 2.155 down | 0.00 | 75.00  | 2-nitropropane dioxygenase                                                         |
| 60557 | 3.26  | 0.11 | 3.42  | 0.16 | 4.72  | 0.12 | 1.123 up    | 2.760 up   | 0.00 | 123.01 | unknown protein                                                                    |
| 60560 | 7.92  | 0.05 | 2.92  | 0.02 | 6.80  | 0.47 | 31.933 down | 2.174 down | 0.00 | 110.22 | unknown protein                                                                    |
| 60565 | 9.98  | 0.10 | 10.00 | 0.02 | 7.72  | 0.35 | 1.012 up    | 4.780 down | 0.00 | 69.41  | unknown protein                                                                    |
| 60578 | 11.71 | 0.14 | 11.53 | 0.08 | 10.52 | 0.15 | 1.131 down  | 2.268 down | 0.00 | 60.74  | Zn2Cys6 transcriptional regulator                                                  |
| 60616 | 12.42 | 0.13 | 10.18 | 0.06 | 10.42 | 0.48 | 4.708 down  | 3.985 down | 0.01 | 22.81  | unknown protein                                                                    |
| 60634 | 11.26 | 0.17 | 11.47 | 0.02 | 10.02 | 0.17 | 1.156 up    | 2.372 down | 0.00 | 81.34  | transcriptional regulator. unknown                                                 |
| 60635 | 5.36  | 0.26 | 4.25  | 0.18 | 10.05 | 1.91 | 2.154 down  | 25.709 up  | 0.02 | 12.76  | GH92 $\alpha$ -1.2-mannosidase                                                     |
| 60638 | 5.49  | 0.09 | 4.42  | 0.58 | 8.04  | 0.16 | 2.099 down  | 5.875 up   | 0.00 | 118.79 | unknown protein                                                                    |
| 60664 | 12.18 | 0.08 | 11.87 | 0.01 | 11.02 | 0.18 | 1.239 down  | 2.244 down | 0.00 | 51.98  | unknown protein with PH domain (putative phosphatidylinositol 4.5-bisphosphate pro |
| 60743 | 12.33 | 0.10 | 12.96 | 0.12 | 13.40 | 0.22 | 1.540 up    | 2.098 up   | 0.01 | 23.27  | Dolichyl-phosphate mannosyltransferase polypeptide 3                               |
| 60758 | 11.64 | 0.27 | 7.97  | 0.01 | 9.29  | 0.14 | 12.719 down | 5.079 down | 0.00 | 265.91 | SAM-dependent methyltransferase                                                    |
| 60761 | 12.98 | 0.07 | 11.97 | 0.27 | 11.15 | 0.31 | 2.016 down  | 3.554 down | 0.00 | 31.87  | transcriptional regulator Grainyhead/CP2                                           |
| 60771 | 11.89 | 0.21 | 12.60 | 0.17 | 13.05 | 0.17 | 1.632 up    | 2.232 up   | 0.00 | 28.61  | prefoldin chaperone                                                                |
| 60810 | 13.51 | 0.16 | 9.84  | 0.06 | 11.90 | 0.33 | 12.659 down | 3.051 down | 0.00 | 94.27  | unknown protein. GPR1/FUN34/yaaH protein. 6TMs                                     |
| 60825 | 3.24  | 0.07 | 3.37  | 0.05 | 5.26  | 0.49 | 1.099 up    | 4.054 up   | 0.01 | 25.86  | Cytochrome P450. putative                                                          |
| 60835 | 11.57 | 0.14 | 11.43 | 0.30 | 10.40 | 0.31 | 1.105 down  | 2.255 down | 0.01 | 15.70  | PutA delta-1-pyrroline-5-carboxylate dehydrogenase                                 |
| 60847 | 13.10 | 0.07 | 12.68 | 0.19 | 12.06 | 0.16 | 1.334 down  | 2.048 down | 0.00 | 33.98  | Mitochondrial F1F0-ATP synthase. subunit c/ATP9/teoleipid                          |
| 60850 | 10.28 | 0.15 | 10.08 | 0.08 | 9.16  | 0.34 | 1.142 down  | 2.173 down | 0.02 | 14.53  | Mitochondrial initiation factor 2 (IF-2).                                          |
| 60890 | 9.90  | 0.01 | 10.19 | 0.12 | 11.60 | 0.27 | 1.224 up    | 3.235 up   | 0.00 | 52.23  | L-galactose dehydrogenase (L-GalDH). putative                                      |
| 60897 | 11.62 | 0.12 | 11.60 | 0.07 | 10.25 | 0.11 | 1.013 down  | 2.589 down | 0.00 | 158.40 | Zn2Cys6 transcriptional regulator                                                  |
| 60931 | 8.79  | 0.05 | 9.21  | 0.12 | 7.76  | 0.24 | 1.335 up    | 2.042 down | 0.00 | 42.29  | Zn2Cys6 transcriptional regulator                                                  |

|       |       |      |       |      |       |      |            |            |      |         |                                                               |
|-------|-------|------|-------|------|-------|------|------------|------------|------|---------|---------------------------------------------------------------|
| 60945 | 12.91 | 0.23 | 10.66 | 0.13 | 13.97 | 0.60 | 4.781 down | 2.081 up   | 0.00 | 32.27   | MFS permease                                                  |
| 60949 | 8.58  | 0.08 | 9.51  | 0.01 | 7.19  | 0.47 | 1.906 up   | 2.613 down | 0.00 | 29.48   | unknown protein                                               |
| 60951 | 12.14 | 0.05 | 11.79 | 0.03 | 10.95 | 0.11 | 1.275 down | 2.289 down | 0.00 | 147.24  | unknown protein                                               |
| 60981 | 9.70  | 0.05 | 9.64  | 0.06 | 8.29  | 0.26 | 1.043 down | 2.651 down | 0.00 | 46.87   | unknown protein                                               |
| 60987 | 11.60 | 0.12 | 11.73 | 0.01 | 9.87  | 0.47 | 1.100 up   | 3.317 down | 0.01 | 23.91   | MRP-type ABC transporter                                      |
| 61020 | 7.06  | 0.14 | 7.86  | 0.13 | 8.28  | 0.17 | 1.740 up   | 2.330 up   | 0.00 | 38.37   | thioesterase superfamily protein                              |
| 61032 | 11.58 | 0.15 | 11.14 | 0.07 | 10.40 | 0.13 | 1.363 down | 2.274 down | 0.00 | 64.23   | unknown protein                                               |
| 61055 | 6.01  | 0.25 | 5.13  | 0.02 | 7.78  | 0.95 | 1.851 down | 3.390 up   | 0.03 | 9.56    | unique protein                                                |
| 61066 | 9.13  | 0.18 | 8.61  | 0.03 | 7.74  | 0.33 | 1.434 down | 2.615 down | 0.01 | 19.18   | GMC oxidoreductase                                            |
| 61116 | 12.72 | 0.18 | 12.77 | 0.06 | 11.61 | 0.29 | 1.039 up   | 2.148 down | 0.01 | 22.18   | ferric reductase                                              |
| 61121 | 10.07 | 0.00 | 9.86  | 0.09 | 8.80  | 0.23 | 1.160 down | 2.413 down | 0.00 | 42.56   | arylsulfatase, putative                                       |
| 61127 | 13.21 | 0.12 | 12.23 | 0.03 | 11.50 | 0.38 | 1.975 down | 3.274 down | 0.01 | 21.81   | Serine carboxypeptidase                                       |
| 61134 | 7.27  | 0.04 | 7.78  | 0.12 | 8.41  | 0.34 | 1.429 up   | 2.205 up   | 0.02 | 12.31   | unknown protein                                               |
| 61190 | 9.22  | 0.23 | 10.04 | 0.01 | 10.37 | 0.44 | 1.766 up   | 2.218 up   | 0.05 | 7.00    | BolA domain-containing protein                                |
| 61222 | 9.09  | 0.08 | 8.89  | 0.16 | 7.39  | 0.34 | 1.149 down | 3.238 down | 0.00 | 34.24   | unknown protein                                               |
| 61278 | 8.56  | 0.03 | 8.33  | 0.11 | 7.47  | 0.32 | 1.175 down | 2.137 down | 0.01 | 15.29   | MFS permease                                                  |
| 61293 | 9.03  | 0.11 | 8.99  | 0.01 | 7.62  | 0.22 | 1.030 down | 2.666 down | 0.00 | 60.19   | dipeptidyl peptidase 5                                        |
| 61383 | 11.92 | 0.06 | 11.04 | 0.01 | 10.48 | 0.23 | 1.849 down | 2.716 down | 0.00 | 41.73   | unknown protein                                               |
| 61441 | 12.38 | 0.07 | 11.75 | 0.04 | 11.21 | 0.18 | 1.542 down | 2.246 down | 0.00 | 42.19   | unknown protein                                               |
| 61476 | 9.73  | 0.17 | 9.23  | 0.11 | 7.79  | 0.25 | 1.409 down | 3.821 down | 0.00 | 66.49   | Zn2Cys6 transcriptional regulator                             |
| 61496 | 10.63 | 0.01 | 10.58 | 0.03 | 12.10 | 0.03 | 1.036 down | 2.757 up   | 0.00 | 2729.14 | MFS permease                                                  |
| 61504 | 10.43 | 0.23 | 9.36  | 0.21 | 8.53  | 0.56 | 2.093 down | 3.731 down | 0.02 | 11.56   | unknown protein                                               |
| 61526 | 9.20  | 0.04 | 7.93  | 0.00 | 7.44  | 0.15 | 2.413 down | 3.380 down | 0.00 | 145.06  | unknown protein                                               |
| 61553 | 9.68  | 0.07 | 7.18  | 0.02 | 7.46  | 0.26 | 5.669 down | 4.651 down | 0.00 | 96.49   | D-xylulose 5-phosphate/D-fructose 6-phosphate phosphoketolase |
| 61605 | 5.92  | 0.21 | 9.20  | 0.11 | 7.21  | 0.28 | 9.729 up   | 2.443 up   | 0.00 | 94.03   | Vacuolar sorting protein VPS1, dynamin, and related proteins  |
| 61618 | 4.46  | 0.13 | 4.71  | 0.15 | 6.16  | 0.29 | 1.187 up   | 3.255 up   | 0.00 | 42.56   | unknown protein                                               |
| 61632 | 11.08 | 0.11 | 12.17 | 0.25 | 12.10 | 0.12 | 2.128 up   | 2.019 up   | 0.00 | 33.76   | unknown protein                                               |
| 61642 | 13.96 | 0.09 | 13.01 | 0.10 | 12.28 | 0.21 | 1.927 down | 3.207 down | 0.00 | 66.28   | unknown protein, secreted                                     |
| 61703 | 6.94  | 0.05 | 7.33  | 0.02 | 8.10  | 0.26 | 1.316 up   | 2.241 up   | 0.01 | 25.10   | germinal center kinase, related to <i>S. cerevisiae</i> Kic1  |
| 61798 | 11.23 | 0.14 | 11.12 | 0.04 | 12.41 | 0.08 | 1.072 down | 2.271 up   | 0.00 | 198.75  | unknown protein, only in ascomycota                           |

|       |       |      |       |      |       |      |             |            |      |        |                                                          |
|-------|-------|------|-------|------|-------|------|-------------|------------|------|--------|----------------------------------------------------------|
| 61830 | 4.61  | 0.55 | 4.11  | 0.37 | 6.16  | 0.28 | 1.405 down  | 2.945 up   | 0.01 | 24.99  | SSCRP                                                    |
| 61858 | 3.03  | 0.06 | 2.61  | 0.04 | 4.52  | 0.20 | 1.334 down  | 2.801 up   | 0.00 | 119.91 | unknown protein                                          |
| 61907 | 11.25 | 0.04 | 11.25 | 0.13 | 10.21 | 0.23 | 1.002 up    | 2.049 down | 0.00 | 29.21  | unknown protein                                          |
| 61910 | 9.34  | 0.06 | 9.82  | 0.09 | 8.33  | 0.22 | 1.396 up    | 2.016 down | 0.00 | 52.74  | Aldehyde dehydrogenase                                   |
| 61939 | 11.89 | 0.02 | 11.83 | 0.08 | 13.48 | 0.23 | 1.044 down  | 3.007 up   | 0.00 | 77.56  | unknown protein                                          |
| 61948 | 3.91  | 0.31 | 3.44  | 0.27 | 5.61  | 0.21 | 1.383 down  | 3.258 up   | 0.00 | 65.12  | Protein disulfide isomerase 2                            |
| 61987 | 9.69  | 0.10 | 9.53  | 0.16 | 8.65  | 0.21 | 1.122 down  | 2.063 down | 0.01 | 27.90  | unknown protein                                          |
| 61995 | 12.44 | 0.02 | 12.54 | 0.19 | 13.62 | 0.16 | 1.071 up    | 2.258 up   | 0.00 | 56.93  | unknown protein                                          |
| 62034 | 10.78 | 0.05 | 10.03 | 0.05 | 8.60  | 0.43 | 1.683 down  | 4.546 down | 0.00 | 32.03  | unknown protein                                          |
| 62086 | 9.38  | 0.10 | 10.02 | 0.14 | 10.73 | 0.20 | 1.555 up    | 2.551 up   | 0.00 | 43.23  | unknown protein                                          |
| 62114 | 8.20  | 0.32 | 7.22  | 0.30 | 6.32  | 0.27 | 1.978 down  | 3.675 down | 0.00 | 28.93  | unknown protein                                          |
| 62153 | 10.73 | 0.02 | 10.14 | 0.15 | 9.58  | 0.12 | 1.503 down  | 2.219 down | 0.00 | 69.62  | malate dehydrogenase                                     |
| 62171 | 8.05  | 0.16 | 7.86  | 0.22 | 10.58 | 0.38 | 1.142 down  | 5.770 up   | 0.00 | 68.47  | MFS permease                                             |
| 62181 | 12.10 | 0.07 | 12.00 | 0.01 | 10.69 | 0.12 | 1.073 down  | 2.658 down | 0.00 | 191.50 | Protein kinase. Ca2+-dependent                           |
| 62213 | 14.16 | 0.01 | 14.13 | 0.03 | 12.27 | 0.10 | 1.021 down  | 3.707 down | 0.00 | 600.43 | unknown protein with fasciclin domain                    |
| 62255 | 2.78  | 0.22 | 2.90  | 0.31 | 4.59  | 0.25 | 1.092 up    | 3.526 up   | 0.00 | 46.53  | lipase. lipocalin related                                |
| 62285 | 11.93 | 0.01 | 11.65 | 0.15 | 10.32 | 0.14 | 1.215 down  | 3.054 down | 0.00 | 136.68 | unknown protein                                          |
| 62323 | 8.77  | 0.16 | 9.14  | 0.06 | 7.62  | 0.39 | 1.296 up    | 2.216 down | 0.01 | 18.98  | unknown protein                                          |
| 62333 | 3.87  | 0.01 | 3.88  | 0.40 | 5.81  | 0.23 | 1.003 up    | 3.830 up   | 0.00 | 57.41  | unknown protein                                          |
| 62340 | 9.34  | 0.12 | 10.87 | 0.03 | 10.75 | 0.10 | 2.892 up    | 2.669 up   | 0.00 | 172.16 | unknown protein                                          |
| 62380 | 13.37 | 0.03 | 9.16  | 0.06 | 11.97 | 0.21 | 18.482 down | 2.628 down | 0.00 | 327.92 | MFS permease (galactose permease ?)                      |
| 62401 | 12.21 | 0.11 | 12.02 | 0.04 | 10.91 | 0.20 | 1.136 down  | 2.453 down | 0.00 | 53.69  | guanine nucleotide exchange factor synembryn. putative   |
| 62424 | 11.09 | 0.24 | 10.87 | 0.09 | 9.39  | 0.24 | 1.165 down  | 3.248 down | 0.00 | 51.37  | UDP-glucose:sterol b-glucosyltransferase                 |
| 62447 | 12.86 | 0.01 | 12.11 | 0.07 | 10.56 | 0.15 | 1.686 down  | 4.938 down | 0.00 | 276.92 | unknown protein                                          |
| 62462 | 11.76 | 0.01 | 11.20 | 0.08 | 13.04 | 0.28 | 1.475 down  | 2.438 up   | 0.00 | 53.68  | PTH11 GPCR                                               |
| 62477 | 8.96  | 0.04 | 10.13 | 0.17 | 10.32 | 0.27 | 2.257 up    | 2.568 up   | 0.01 | 26.63  | Vacuolar protein sorting-associated protein Vps28        |
| 62480 | 9.47  | 0.08 | 10.22 | 0.32 | 10.50 | 0.16 | 1.686 up    | 2.049 up   | 0.01 | 19.05  | mitochondrial tricarboxylate transporter (Ctp). putative |
| 62484 | 10.98 | 0.03 | 9.45  | 0.01 | 9.00  | 0.28 | 2.877 down  | 3.937 down | 0.00 | 55.93  | unknown protein                                          |
| 62488 | 10.02 | 0.01 | 11.62 | 0.09 | 11.50 | 0.18 | 3.022 up    | 2.780 up   | 0.00 | 79.12  | MFS permease                                             |
| 62502 | 12.31 | 0.05 | 12.66 | 0.08 | 10.98 | 0.14 | 1.270 up    | 2.522 down | 0.00 | 180.09 | MFS permease                                             |

|       |       |      |       |      |       |      |            |             |      |         |                                                         |
|-------|-------|------|-------|------|-------|------|------------|-------------|------|---------|---------------------------------------------------------|
| 62556 | 10.86 | 0.07 | 9.78  | 0.07 | 9.20  | 0.34 | 2.118 down | 3.153 down  | 0.01 | 25.49   | unknown protein                                         |
| 62611 | 13.56 | 0.35 | 12.64 | 0.28 | 10.43 | 0.17 | 1.888 down | 8.764 down  | 0.00 | 131.15  | MRP-type ABC transporter                                |
| 62651 | 12.13 | 0.20 | 11.73 | 0.22 | 9.71  | 0.27 | 1.323 down | 5.377 down  | 0.00 | 81.82   | long-chain fatty acid transporter.                      |
| 62663 | 7.26  | 0.13 | 7.55  | 0.03 | 8.61  | 0.30 | 1.221 up   | 2.548 up    | 0.01 | 25.32   | unknown protein                                         |
| 62693 | 12.91 | 0.13 | 12.96 | 0.04 | 8.73  | 0.29 | 1.031 up   | 18.111 down | 0.00 | 326.74  | ABC-transporter Ste6p                                   |
| 62704 | 9.85  | 0.03 | 9.60  | 0.00 | 8.73  | 0.07 | 1.191 down | 2.177 down  | 0.00 | 382.90  | GH18. chitinase CHI18-3                                 |
| 62711 | 13.76 | 0.04 | 13.44 | 0.07 | 12.72 | 0.13 | 1.252 down | 2.050 down  | 0.00 | 67.51   | amino acid transporter                                  |
| 62716 | 5.18  | 0.15 | 6.46  | 0.05 | 14.19 | 0.12 | 2.434 up   | 515.554 up  | 0.00 | 5318.91 | Ctr copper transporter family protein                   |
| 62805 | 10.55 | 0.11 | 11.06 | 0.05 | 9.09  | 0.48 | 1.427 up   | 2.758 down  | 0.01 | 21.90   | C2H2 transcriptional regulator                          |
| 62836 | 12.48 | 0.02 | 12.02 | 0.13 | 11.01 | 0.24 | 1.377 down | 2.777 down  | 0.00 | 44.20   | unknown protein                                         |
| 62872 | 13.50 | 0.04 | 14.52 | 0.00 | 10.24 | 0.17 | 2.024 up   | 9.608 down  | 0.00 | 801.65  | unknown protein GPR1/FUN34/yaaH-like                    |
| 62912 | 10.88 | 0.15 | 11.74 | 0.19 | 12.25 | 0.42 | 1.810 up   | 2.580 up    | 0.02 | 10.77   | unknown protein. 1TM                                    |
| 62977 | 8.80  | 0.15 | 7.33  | 0.05 | 7.13  | 0.44 | 2.778 down | 3.175 down  | 0.01 | 15.77   | nucleoside diphosphate sugar epimerase. secreted        |
| 63007 | 11.14 | 0.03 | 10.48 | 0.02 | 9.22  | 0.27 | 1.582 down | 3.793 down  | 0.00 | 63.31   | meiotic chromosome segregation protein. putative        |
| 63152 | 11.92 | 0.01 | 11.75 | 0.02 | 10.65 | 0.16 | 1.122 down | 2.397 down  | 0.00 | 89.81   | Cut9 interacting protein Scn1. putative                 |
| 63163 | 10.24 | 0.18 | 10.27 | 0.23 | 9.17  | 0.22 | 1.015 up   | 2.105 down  | 0.01 | 24.63   | unknown protein                                         |
| 63202 | 11.99 | 0.00 | 11.71 | 0.06 | 9.79  | 0.18 | 1.213 down | 4.578 down  | 0.00 | 213.52  | alpha/beta hydrolase.                                   |
| 63204 | 13.22 | 0.12 | 12.94 | 0.11 | 12.10 | 0.13 | 1.214 down | 2.179 down  | 0.00 | 68.76   | flavodoxin domain containing protein                    |
| 63379 | 9.28  | 0.09 | 10.30 | 0.24 | 10.57 | 0.29 | 2.029 up   | 2.439 up    | 0.01 | 17.80   | RNA polymerase II transcriptional coactivator. putative |
| 63395 | 11.49 | 0.10 | 12.00 | 0.11 | 10.26 | 0.24 | 1.427 up   | 2.347 down  | 0.00 | 60.27   | Glycerophosphoryl diester phosphodiesterase             |
| 63400 | 12.12 | 0.00 | 11.74 | 0.15 | 11.04 | 0.42 | 1.303 down | 2.106 down  | 0.04 | 7.62    | mitochondrial exoribonuclease Cyt-4                     |
| 63503 | 9.36  | 0.01 | 9.85  | 0.10 | 10.52 | 0.10 | 1.398 up   | 2.238 up    | 0.00 | 120.72  | ribosomal protein S2 and tRNA/rRNA methyltransferase.   |
| 63526 | 7.20  | 0.11 | 8.40  | 0.21 | 9.86  | 0.76 | 2.301 up   | 6.318 up    | 0.02 | 13.88   | SSCRP                                                   |
| 63653 | 8.36  | 0.13 | 11.65 | 0.17 | 10.78 | 0.54 | 9.788 up   | 5.352 up    | 0.00 | 32.50   | ankyrin                                                 |
| 63687 | 10.12 | 0.02 | 8.04  | 0.18 | 9.01  | 0.57 | 4.207 down | 2.154 down  | 0.03 | 10.58   | ankyrin                                                 |
| 63692 | 8.79  | 0.06 | 8.36  | 0.14 | 7.34  | 0.12 | 1.343 down | 2.729 down  | 0.00 | 114.60  | dipeptidyl peptidase 5                                  |
| 63702 | 11.90 | 0.08 | 11.48 | 0.02 | 10.66 | 0.10 | 1.342 down | 2.367 down  | 0.00 | 146.37  | unknown protein                                         |
| 63710 | 3.49  | 0.48 | 3.17  | 0.17 | 4.57  | 0.08 | 1.246 down | 2.107 up    | 0.01 | 28.05   | MMR; HR regulation                                      |
| 63727 | 11.71 | 0.11 | 11.71 | 0.04 | 10.56 | 0.06 | 1.004 down | 2.219 down  | 0.00 | 241.90  | Acyl-CoA dehydrogenase. central region                  |
| 63756 | 9.82  | 0.01 | 8.34  | 0.18 | 8.47  | 0.23 | 2.781 down | 2.539 down  | 0.00 | 38.77   | helicase. DEAD-box superfamily                          |

|       |       |      |       |      |       |      |            |            |      |        |                                                        |
|-------|-------|------|-------|------|-------|------|------------|------------|------|--------|--------------------------------------------------------|
| 63815 | 8.24  | 0.36 | 8.31  | 0.10 | 10.56 | 0.27 | 1.051 up   | 4.989 up   | 0.00 | 71.74  | Membrane coat complex Retromer. subunit Vps26          |
| 63837 | 6.97  | 0.22 | 6.87  | 0.12 | 5.60  | 0.19 | 1.072 down | 2.580 down | 0.00 | 51.05  | unknown protein                                        |
| 63868 | 12.27 | 0.17 | 10.83 | 0.29 | 10.74 | 0.23 | 2.728 down | 2.899 down | 0.00 | 30.82  | unknown protein                                        |
| 63881 | 8.65  | 0.11 | 9.81  | 0.28 | 9.80  | 0.26 | 2.236 up   | 2.218 up   | 0.01 | 17.07  | unknown protein                                        |
| 63899 | 7.43  | 0.28 | 8.07  | 0.10 | 9.65  | 0.43 | 1.554 up   | 4.639 up   | 0.00 | 29.96  | unknown protein                                        |
| 63914 | 12.17 | 0.14 | 11.35 | 0.04 | 10.52 | 0.24 | 1.761 down | 3.150 down | 0.00 | 50.23  | integral membrane protein. putative                    |
| 63919 | 9.02  | 0.04 | 10.16 | 0.02 | 10.47 | 0.17 | 2.195 up   | 2.727 up   | 0.00 | 81.27  | Cys/Met metabolism PLP-dependent enzyme                |
| 63966 | 4.65  | 0.19 | 4.61  | 0.18 | 6.45  | 0.10 | 1.027 down | 3.494 up   | 0.00 | 172.27 | high-affinity glucose transporter                      |
| 63978 | 11.83 | 0.04 | 11.65 | 0.07 | 10.51 | 0.15 | 1.133 down | 2.490 down | 0.00 | 96.69  | Zn2Cys6 transcriptional regulator                      |
| 64018 | 13.00 | 0.01 | 13.15 | 0.10 | 11.32 | 0.32 | 1.107 up   | 3.214 down | 0.00 | 48.23  | GPCR. mating type pheromone G-protein coupled receptor |
| 64029 | 11.06 | 0.14 | 10.75 | 0.02 | 9.77  | 0.22 | 1.233 down | 2.447 down | 0.00 | 40.91  | folylpolyglutamate synthase . putative                 |
| 64049 | 6.14  | 0.38 | 6.05  | 0.29 | 9.12  | 0.88 | 1.064 down | 7.850 up   | 0.01 | 17.94  | unknown protein                                        |
| 64066 | 11.95 | 0.08 | 12.21 | 0.02 | 10.50 | 0.15 | 1.196 up   | 2.742 down | 0.00 | 171.56 | acyltransferase 3                                      |
| 64172 | 8.33  | 0.03 | 9.00  | 0.11 | 9.77  | 0.32 | 1.590 up   | 2.704 up   | 0.01 | 21.85  | Glutathione-dependent formaldehyde-activating.GFA      |
| 64181 | 6.49  | 0.22 | 7.41  | 0.03 | 7.77  | 0.48 | 1.885 up   | 2.427 up   | 0.04 | 7.51   | SSCRP                                                  |
| 64288 | 2.96  | 0.43 | 2.71  | 0.24 | 4.22  | 0.16 | 1.188 down | 2.399 up   | 0.00 | 30.72  | unknown protein                                        |
| 64295 | 13.49 | 0.01 | 13.17 | 0.06 | 12.03 | 0.09 | 1.242 down | 2.735 down | 0.00 | 282.73 | nitrogen permease regulator Npr2. putative             |
| 64312 | 10.82 | 0.11 | 9.86  | 0.19 | 8.77  | 0.43 | 1.953 down | 4.165 down | 0.01 | 23.90  | unknown protein. only present in fungi                 |
| 64318 | 10.80 | 0.01 | 11.17 | 0.15 | 11.86 | 0.26 | 1.295 up   | 2.086 up   | 0.01 | 19.14  | unknown protein                                        |
| 64370 | 11.10 | 0.00 | 9.92  | 0.15 | 8.06  | 0.24 | 2.259 down | 8.211 down | 0.00 | 165.00 | calpain-like protease                                  |
| 64448 | 12.64 | 0.05 | 13.42 | 0.08 | 14.15 | 0.08 | 1.720 up   | 2.858 up   | 0.00 | 281.90 | unknown protein                                        |
| 64469 | 12.17 | 0.15 | 11.25 | 0.24 | 11.06 | 0.20 | 1.902 down | 2.170 down | 0.01 | 22.17  | Hydrolases of alpha/beta hydrolase superfamily         |
| 64545 | 11.63 | 0.04 | 10.44 | 0.03 | 9.74  | 0.15 | 2.286 down | 3.702 down | 0.00 | 168.21 | MFS permease                                           |
| 64620 | 11.03 | 0.01 | 10.56 | 0.01 | 9.87  | 0.26 | 1.383 down | 2.236 down | 0.01 | 24.39  | Alpha/beta hydrolase                                   |
| 64667 | 13.55 | 0.07 | 11.55 | 0.19 | 11.83 | 0.47 | 4.014 down | 3.283 down | 0.01 | 18.11  | unknown protein                                        |
| 64672 | 9.61  | 0.22 | 9.23  | 0.11 | 7.29  | 0.11 | 1.298 down | 4.986 down | 0.00 | 235.56 | Helix-turn-helix. AraC type                            |
| 64676 | 8.24  | 0.07 | 10.19 | 0.25 | 9.52  | 0.26 | 3.856 up   | 2.420 up   | 0.00 | 36.17  | unknown protein                                        |
| 64710 | 10.98 | 0.12 | 10.52 | 0.18 | 8.94  | 0.16 | 1.372 down | 4.096 down | 0.00 | 136.61 | AAA+-type ATPase                                       |
| 64719 | 10.24 | 0.05 | 9.40  | 0.03 | 9.06  | 0.17 | 1.795 down | 2.267 down | 0.00 | 53.49  | Subtilisin like protease (SUB3)                        |
| 64827 | 11.92 | 0.06 | 11.54 | 0.10 | 10.23 | 0.27 | 1.302 down | 3.227 down | 0.00 | 49.77  | GH36 raffinose synthase domain protein                 |

|       |       |      |       |      |       |      |             |            |      |        |                                                                                       |
|-------|-------|------|-------|------|-------|------|-------------|------------|------|--------|---------------------------------------------------------------------------------------|
| 64834 | 11.00 | 0.04 | 10.78 | 0.08 | 9.57  | 0.24 | 1.158 down  | 2.680 down | 0.00 | 49.76  | unknown protein                                                                       |
| 64874 | 13.37 | 0.10 | 13.72 | 0.17 | 12.13 | 0.24 | 1.271 up    | 2.365 down | 0.00 | 48.77  | MFS toxin efflux pump                                                                 |
| 64882 | 10.29 | 0.11 | 8.34  | 0.20 | 8.51  | 0.19 | 3.852 down  | 3.417 down | 0.00 | 79.16  | MFS permease                                                                          |
| 64916 | 11.05 | 0.06 | 11.80 | 0.04 | 9.60  | 0.77 | 1.689 up    | 2.720 down | 0.03 | 10.02  | unknown protein                                                                       |
| 64919 | 4.55  | 0.27 | 5.05  | 0.22 | 6.26  | 0.26 | 1.410 up    | 3.266 up   | 0.00 | 33.76  | MFS permease                                                                          |
| 64925 | 11.35 | 0.10 | 12.38 | 0.07 | 12.56 | 0.17 | 2.051 up    | 2.320 up   | 0.00 | 50.56  | GT32 a-glycosyltransferase                                                            |
| 64937 | 7.31  | 0.09 | 7.37  | 0.03 | 8.69  | 0.53 | 1.045 up    | 2.616 up   | 0.02 | 10.81  | unknown protein                                                                       |
| 64951 | 3.80  | 0.16 | 3.60  | 0.06 | 5.64  | 0.39 | 1.147 down  | 3.583 up   | 0.00 | 38.84  | unknown protein                                                                       |
| 64956 | 3.21  | 0.29 | 3.66  | 0.18 | 4.89  | 0.21 | 1.370 up    | 3.208 up   | 0.00 | 45.55  | unknown protein                                                                       |
| 64959 | 11.30 | 0.18 | 7.57  | 0.01 | 10.02 | 0.18 | 13.328 down | 2.437 down | 0.00 | 274.98 | phosphatidyl synthase                                                                 |
| 64971 | 9.89  | 0.04 | 8.87  | 0.10 | 8.54  | 0.46 | 2.033 down  | 2.559 down | 0.03 | 9.51   | Amino acid permeases                                                                  |
| 64996 | 3.95  | 0.08 | 6.69  | 0.10 | 6.46  | 0.79 | 6.698 up    | 5.718 up   | 0.02 | 13.53  | nitrilase                                                                             |
| 65021 | 5.65  | 0.13 | 6.06  | 0.20 | 7.25  | 0.41 | 1.331 up    | 3.039 up   | 0.01 | 18.30  | short chain dehydrogenase/reductase                                                   |
| 65029 | 12.94 | 0.00 | 12.60 | 0.05 | 11.81 | 0.35 | 1.263 down  | 2.182 down | 0.02 | 13.39  | 2OG-Fe(II) oxygenase superfamily protein                                              |
| 65037 | 5.95  | 0.01 | 5.27  | 0.04 | 7.18  | 0.09 | 1.602 down  | 2.345 up   | 0.00 | 490.32 | pyrophosphatase                                                                       |
| 65040 | 3.38  | 0.10 | 3.25  | 0.27 | 4.77  | 0.14 | 1.088 down  | 2.634 up   | 0.00 | 76.58  | cytochrome P450. putative                                                             |
| 65067 | 4.31  | 0.19 | 3.41  | 0.19 | 6.07  | 0.24 | 1.860 down  | 3.403 up   | 0.00 | 105.24 | short chain dehydrogenase/reductase                                                   |
| 65095 | 5.17  | 0.12 | 5.36  | 0.11 | 6.42  | 0.12 | 1.135 up    | 2.378 up   | 0.00 | 97.83  | unknown protein                                                                       |
| 65096 | 6.81  | 0.24 | 7.26  | 0.14 | 8.09  | 0.42 | 1.360 up    | 2.422 up   | 0.03 | 10.00  | 3'-tRNA processing endoribonuclease                                                   |
| 65098 | 3.78  | 0.06 | 4.25  | 0.01 | 5.88  | 0.11 | 1.379 up    | 4.278 up   | 0.00 | 482.28 | FAD-binding domain and SignalP-predicted secretion signal. Distantly related to tre36 |
| 65102 | 3.65  | 0.38 | 3.66  | 0.36 | 5.02  | 0.18 | 1.007 up    | 2.577 up   | 0.01 | 24.56  | unknown protein                                                                       |
| 65106 | 4.46  | 0.08 | 4.58  | 0.32 | 9.24  | 1.03 | 1.083 up    | 27.491 up  | 0.00 | 33.64  | CN_hydrolase                                                                          |
| 65107 | 11.66 | 0.07 | 11.22 | 0.08 | 10.41 | 0.10 | 1.357 down  | 2.374 down | 0.00 | 142.19 | cytochrome P450                                                                       |
| 65116 | 4.04  | 0.56 | 4.29  | 0.02 | 5.36  | 0.25 | 1.187 up    | 2.497 up   | 0.02 | 14.62  | PKS                                                                                   |
| 65117 | 6.15  | 0.40 | 4.67  | 0.43 | 4.87  | 0.16 | 2.782 down  | 2.425 down | 0.01 | 16.37  | ankyrin                                                                               |
| 65133 | 7.83  | 0.10 | 8.29  | 0.13 | 6.33  | 0.54 | 1.370 up    | 2.840 down | 0.01 | 17.26  | Zn2Cys6 transcriptional regulator                                                     |
| 65141 | 6.54  | 0.15 | 6.57  | 0.13 | 7.80  | 0.31 | 1.022 up    | 2.394 up   | 0.01 | 23.45  | cytochrome P450 monooxygenase                                                         |
| 65142 | 9.07  | 0.05 | 9.92  | 0.05 | 10.32 | 0.26 | 1.800 up    | 2.379 up   | 0.01 | 25.89  | aldehyde dehydrogenase ALDH                                                           |
| 65153 | 9.45  | 0.10 | 9.48  | 0.13 | 8.43  | 0.33 | 1.019 up    | 2.030 down | 0.01 | 15.53  | MFS permease                                                                          |
| 65156 | 6.32  | 0.19 | 7.24  | 0.10 | 7.74  | 0.31 | 1.887 up    | 2.672 up   | 0.01 | 19.81  | S1/P1 nuclease                                                                        |

|       |       |      |       |      |       |      |             |             |      |        |                                                                                |
|-------|-------|------|-------|------|-------|------|-------------|-------------|------|--------|--------------------------------------------------------------------------------|
| 65162 | 10.94 | 0.19 | 12.83 | 0.03 | 13.37 | 0.14 | 3.710 up    | 5.381 up    | 0.00 | 210.52 | GH18 endo-N-acetyl-β-D-glucosaminidase Endo T                                  |
| 65164 | 12.52 | 0.16 | 11.75 | 0.02 | 11.22 | 0.19 | 1.711 down  | 2.468 down  | 0.00 | 43.30  | unknown protein                                                                |
| 65172 | 5.02  | 0.17 | 5.05  | 0.04 | 6.17  | 0.21 | 1.018 up    | 2.221 up    | 0.00 | 38.75  | PKS                                                                            |
| 65223 | 8.89  | 0.14 | 9.58  | 0.04 | 7.79  | 0.13 | 1.609 up    | 2.156 down  | 0.00 | 160.57 | unknown protein                                                                |
| 65229 | 9.68  | 0.08 | 11.34 | 0.01 | 10.95 | 0.12 | 3.163 up    | 2.411 up    | 0.00 | 147.35 | unknown protein                                                                |
| 65232 | 9.03  | 0.19 | 9.21  | 0.08 | 7.41  | 0.39 | 1.132 up    | 3.068 down  | 0.00 | 29.32  | short chain dehydrogenase/reductase                                            |
| 65286 | 9.49  | 0.02 | 9.79  | 0.16 | 8.15  | 0.13 | 1.227 up    | 2.536 down  | 0.00 | 147.30 | unknown protein                                                                |
| 65315 | 12.82 | 0.06 | 8.79  | 0.13 | 9.29  | 0.77 | 16.360 down | 11.572 down | 0.00 | 29.31  | bZIP transcription factor                                                      |
| 65324 | 8.73  | 0.00 | 9.42  | 0.19 | 11.30 | 0.23 | 1.609 up    | 5.921 up    | 0.00 | 135.59 | metacaspase CasA                                                               |
| 65333 | 12.54 | 0.01 | 11.26 | 0.24 | 10.24 | 0.25 | 2.438 down  | 4.942 down  | 0.00 | 72.53  | GH15 alpha-glycosidase (Glucoamylase and related glycosyl hydrolases)          |
| 65380 | 10.51 | 0.12 | 11.99 | 0.04 | 11.93 | 0.26 | 2.788 up    | 2.669 up    | 0.00 | 36.52  | GH47 α-1.2-mannosidase                                                         |
| 65494 | 9.71  | 0.06 | 11.70 | 0.13 | 11.08 | 0.58 | 3.957 up    | 2.590 up    | 0.03 | 10.24  | metallopeptidase                                                               |
| 65499 | 5.29  | 0.43 | 5.16  | 0.09 | 6.80  | 0.20 | 1.096 down  | 2.838 up    | 0.00 | 39.00  | Tyrosine specific protein phosphatase and dual specificity protein phosphatase |
| 65508 | 13.05 | 0.10 | 12.90 | 0.03 | 11.76 | 0.27 | 1.109 down  | 2.452 down  | 0.00 | 31.46  | fructose-bisphosphatase                                                        |
| 65522 | 11.90 | 0.17 | 8.57  | 0.05 | 9.84  | 0.55 | 10.051 down | 4.155 down  | 0.00 | 29.92  | unknown protein                                                                |
| 65547 | 8.18  | 0.01 | 8.48  | 0.02 | 6.52  | 0.10 | 1.235 up    | 3.156 down  | 0.00 | 559.48 | mandelate racemase/muconate lactonase-like protein                             |
| 65572 | 11.88 | 0.26 | 11.70 | 0.00 | 10.48 | 0.35 | 1.131 down  | 2.638 down  | 0.01 | 19.98  | unknown protein                                                                |
| 65603 | 5.97  | 0.05 | 6.76  | 0.03 | 7.41  | 0.10 | 1.730 up    | 2.704 up    | 0.00 | 218.43 | unknown protein                                                                |
| 65607 | 12.60 | 0.06 | 12.50 | 0.17 | 11.41 | 0.17 | 1.071 down  | 2.279 down  | 0.00 | 54.57  | RgsC. regulator of G-protein signaling                                         |
| 65640 | 7.63  | 0.06 | 8.39  | 0.00 | 9.44  | 0.17 | 1.692 up    | 3.499 up    | 0.00 | 122.56 | unknown protein                                                                |
| 65711 | 12.41 | 0.09 | 13.00 | 0.02 | 13.87 | 0.17 | 1.504 up    | 2.757 up    | 0.00 | 77.00  | SAM-dependent methyltransferase                                                |
| 65718 | 14.38 | 0.00 | 13.13 | 0.14 | 13.04 | 0.10 | 2.383 down  | 2.523 down  | 0.00 | 127.25 | unknown protein                                                                |
| 65736 | 5.12  | 0.22 | 6.20  | 0.12 | 7.28  | 0.27 | 2.122 up    | 4.485 up    | 0.00 | 57.97  | catabolic 3-dehydroquinase                                                     |
| 65739 | 10.32 | 0.10 | 9.69  | 0.05 | 8.08  | 0.36 | 1.548 down  | 4.721 down  | 0.00 | 49.11  | unknown protein                                                                |
| 65746 | 11.35 | 0.07 | 11.13 | 0.11 | 9.96  | 0.23 | 1.162 down  | 2.609 down  | 0.00 | 47.32  | Zn2Cys6 transcriptional regulator                                              |
| 65768 | 12.51 | 0.05 | 12.86 | 0.20 | 11.48 | 0.35 | 1.275 up    | 2.053 down  | 0.01 | 18.56  | unknown protein                                                                |
| 65771 | 3.32  | 0.15 | 3.49  | 0.21 | 6.02  | 0.25 | 1.125 up    | 6.530 up    | 0.00 | 133.71 | NACHT domain WD40 repeat-containing protein. related to HET                    |
| 65817 | 9.57  | 0.03 | 7.01  | 0.13 | 7.80  | 0.21 | 5.911 down  | 3.410 down  | 0.00 | 115.75 | GT α-1.3-mannosyltransferase CMT1                                              |
| 65819 | 7.73  | 0.13 | 7.17  | 0.01 | 6.41  | 0.37 | 1.477 down  | 2.505 down  | 0.02 | 14.34  | Molecular chaperone Hsp70 family                                               |
| 65821 | 11.91 | 0.22 | 11.69 | 0.07 | 10.83 | 0.10 | 1.160 down  | 2.113 down  | 0.00 | 57.75  | vacuolar targeting protein Atg18                                               |



|       |       |      |       |      |       |      |             |            |      |        |                                                                                            |
|-------|-------|------|-------|------|-------|------|-------------|------------|------|--------|--------------------------------------------------------------------------------------------|
| 65873 | 10.68 | 0.14 | 10.13 | 0.08 | 9.49  | 0.03 | 1.464 down  | 2.278 down | 0.00 | 166.62 | protein kinase A, catalytic subunit                                                        |
| 65882 | 10.26 | 0.13 | 9.82  | 0.03 | 8.99  | 0.14 | 1.350 down  | 2.411 down | 0.00 | 77.58  | dihydrodipicolinate synthase, putative                                                     |
| 65883 | 10.29 | 0.13 | 8.07  | 0.26 | 8.24  | 0.39 | 4.669 down  | 4.131 down | 0.00 | 30.96  | D-isomer-specific 2-hydroxy acid dehydrogenase                                             |
| 65891 | 10.76 | 0.08 | 10.10 | 0.05 | 9.38  | 0.52 | 1.574 down  | 2.603 down | 0.04 | 7.94   | PKS                                                                                        |
| 65921 | 7.81  | 0.02 | 7.80  | 0.02 | 9.58  | 0.47 | 1.005 down  | 3.414 up   | 0.01 | 23.91  | Acetyl/propionyl-CoA carboxylase alpha subunit                                             |
| 65925 | 6.90  | 0.08 | 7.27  | 0.12 | 8.09  | 0.20 | 1.289 up    | 2.282 up   | 0.00 | 39.42  | cytidine and deoxycytidylate deaminase zinc-binding region                                 |
| 65933 | 6.13  | 0.30 | 7.21  | 0.06 | 7.25  | 0.27 | 2.112 up    | 2.174 up   | 0.01 | 14.69  | Epl1/Sm1                                                                                   |
| 65949 | 8.32  | 0.13 | 11.21 | 0.09 | 9.47  | 0.36 | 7.410 up    | 2.214 up   | 0.00 | 50.95  | unknown protein                                                                            |
| 65950 | 8.29  | 0.04 | 8.54  | 0.06 | 6.74  | 0.14 | 1.188 up    | 2.931 down | 0.00 | 221.30 | unknown protein                                                                            |
| 65957 | 9.80  | 0.06 | 9.77  | 0.00 | 8.74  | 0.12 | 1.022 down  | 2.086 down | 0.00 | 111.23 | unknown protein                                                                            |
| 65975 | 9.70  | 0.08 | 9.01  | 0.06 | 8.22  | 0.46 | 1.609 down  | 2.796 down | 0.02 | 11.72  | unknown protein                                                                            |
| 65986 | 10.77 | 0.12 | 10.22 | 0.16 | 9.33  | 0.42 | 1.463 down  | 2.718 down | 0.02 | 13.15  | GH27 $\alpha$ -galactosidase                                                               |
| 65997 | 9.57  | 0.20 | 10.38 | 0.00 | 11.25 | 0.18 | 1.751 up    | 3.188 up   | 0.00 | 68.40  | Cyclophilin type peptidyl-prolyl cis-trans isomerase                                       |
| 66016 | 12.23 | 0.01 | 10.16 | 0.14 | 10.62 | 0.12 | 4.207 down  | 3.062 down | 0.00 | 202.79 | dienelactone hydrolase                                                                     |
| 66023 | 9.71  | 0.09 | 9.67  | 0.03 | 8.31  | 0.22 | 1.028 down  | 2.627 down | 0.00 | 61.18  | unknown protein                                                                            |
| 66034 | 7.76  | 0.27 | 7.61  | 0.06 | 5.19  | 0.58 | 1.104 down  | 5.924 down | 0.00 | 28.44  | unknown protein                                                                            |
| 66077 | 3.39  | 0.09 | 3.19  | 0.11 | 5.34  | 0.15 | 1.149 down  | 3.847 up   | 0.00 | 238.23 | ooc1-related protein                                                                       |
| 66092 | 11.38 | 0.02 | 8.31  | 0.38 | 9.94  | 0.22 | 8.365 down  | 2.706 down | 0.00 | 81.94  | unique protein                                                                             |
| 66103 | 12.17 | 0.14 | 13.09 | 0.05 | 13.45 | 0.10 | 1.891 up    | 2.429 up   | 0.00 | 99.41  | WbbJ Acetyltransferase (isoleucine patch superfamily)                                      |
| 66210 | 8.39  | 0.02 | 8.94  | 0.04 | 9.54  | 0.18 | 1.461 up    | 2.221 up   | 0.00 | 47.52  | unknown protein                                                                            |
| 66228 | 5.97  | 0.03 | 6.21  | 0.05 | 7.75  | 0.55 | 1.186 up    | 3.451 up   | 0.01 | 15.54  | unknown protein                                                                            |
| 66268 | 13.01 | 0.14 | 12.89 | 0.11 | 11.79 | 0.14 | 1.083 down  | 2.323 down | 0.00 | 75.40  | unknown protein                                                                            |
| 66345 | 11.79 | 0.03 | 11.50 | 0.07 | 14.57 | 0.13 | 1.222 down  | 6.910 up   | 0.00 | 773.21 | Mn superoxide dismutase                                                                    |
| 66370 | 4.39  | 0.03 | 4.25  | 0.06 | 6.58  | 0.51 | 1.105 down  | 4.544 up   | 0.00 | 32.25  | unknown protein                                                                            |
| 66394 | 11.29 | 0.08 | 11.42 | 0.02 | 9.71  | 0.19 | 1.099 up    | 2.982 down | 0.00 | 120.69 | DNA polymerase family X member. Most closely related to DNA polymerase mu. an en activity. |
| 66510 | 2.93  | 0.31 | 2.80  | 0.13 | 4.38  | 0.16 | 1.090 down  | 2.723 up   | 0.00 | 60.85  | short chain dehydrogenase/reductase                                                        |
| 66521 | 11.51 | 0.19 | 12.70 | 0.07 | 10.42 | 0.23 | 2.283 up    | 2.125 down | 0.00 | 88.69  | unknown protein                                                                            |
| 66534 | 9.56  | 0.00 | 5.71  | 0.08 | 7.80  | 1.11 | 14.354 down | 3.374 down | 0.03 | 9.99   | Cytochrome P450 CYP2 subfamily                                                             |
| 66551 | 7.18  | 0.13 | 5.93  | 0.14 | 5.89  | 0.13 | 2.368 down  | 2.445 down | 0.00 | 71.41  | AAA ATPase                                                                                 |

|       |       |      |       |      |       |      |             |            |      |         |                                                  |
|-------|-------|------|-------|------|-------|------|-------------|------------|------|---------|--------------------------------------------------|
| 66563 | 10.78 | 0.03 | 11.87 | 0.00 | 12.27 | 0.18 | 2.132 up    | 2.812 up   | 0.00 | 73.89   | unknown protein                                  |
| 66598 | 10.69 | 0.05 | 9.09  | 0.02 | 9.10  | 0.37 | 3.037 down  | 3.008 down | 0.01 | 23.40   | NADPH:quinone oxidoreductase                     |
| 66606 | 9.73  | 0.08 | 10.06 | 0.03 | 8.49  | 0.31 | 1.256 up    | 2.361 down | 0.00 | 33.93   | Zn2Cys6 transcriptional regulator                |
| 66614 | 9.91  | 0.01 | 9.69  | 0.21 | 7.95  | 0.31 | 1.167 down  | 3.892 down | 0.00 | 50.23   | alpha/beta hydrolase                             |
| 66657 | 9.19  | 0.28 | 8.61  | 0.15 | 7.33  | 0.47 | 1.494 down  | 3.626 down | 0.01 | 16.97   | MFS permease                                     |
| 66662 | 11.31 | 0.10 | 11.11 | 0.08 | 9.71  | 0.27 | 1.148 down  | 3.023 down | 0.00 | 46.98   | Mandelate racemase/muconate lactonizing protein  |
| 66726 | 8.99  | 0.02 | 5.58  | 0.08 | 7.84  | 1.11 | 10.629 down | 2.210 down | 0.04 | 8.31    | FAD binding protein                              |
| 66751 | 5.11  | 0.00 | 4.77  | 0.04 | 6.27  | 0.63 | 1.261 down  | 2.246 up   | 0.04 | 7.79    | unknown protein                                  |
| 66753 | 6.41  | 0.13 | 6.50  | 0.05 | 8.15  | 0.44 | 1.065 up    | 3.341 up   | 0.01 | 23.42   | unknown protein                                  |
| 66758 | 7.13  | 0.00 | 6.56  | 0.01 | 8.21  | 0.55 | 1.479 down  | 2.110 up   | 0.02 | 10.88   | Ankyrin                                          |
| 66766 | 4.42  | 0.20 | 3.60  | 0.10 | 8.68  | 0.06 | 1.758 down  | 19.235 up  | 0.00 | 1788.24 | Carbon-nitrogen hydrolase                        |
| 66776 | 6.90  | 0.31 | 6.42  | 0.19 | 8.17  | 0.63 | 1.399 down  | 2.410 up   | 0.03 | 9.01    | unknown protein                                  |
| 66786 | 12.32 | 0.00 | 10.09 | 0.12 | 10.92 | 0.37 | 4.715 down  | 2.649 down | 0.00 | 30.29   | unknown protein                                  |
| 66788 | 9.09  | 0.10 | 11.05 | 0.08 | 11.68 | 0.69 | 3.890 up    | 5.984 up   | 0.01 | 15.41   | unknown protein                                  |
| 66804 | 11.01 | 0.08 | 10.55 | 0.13 | 9.65  | 0.29 | 1.376 down  | 2.571 down | 0.01 | 26.01   | GH69: candidate a-glycosyltransferase            |
| 66819 | 13.16 | 0.13 | 12.89 | 0.11 | 12.05 | 0.29 | 1.208 down  | 2.170 down | 0.01 | 17.56   | Amino acid transporter LysP                      |
| 66827 | 9.66  | 0.03 | 9.34  | 0.04 | 7.57  | 0.34 | 1.251 down  | 4.262 down | 0.00 | 55.20   | Zinc-containing alcohol dehydrogenase            |
| 66828 | 13.58 | 0.20 | 14.26 | 0.14 | 12.33 | 0.22 | 1.603 up    | 2.380 down | 0.00 | 69.86   | Zn2Cys6 transcriptional regulator                |
| 66859 | 3.22  | 0.10 | 3.49  | 0.36 | 5.47  | 0.24 | 1.205 up    | 4.750 up   | 0.00 | 70.38   | serine peptidase S28                             |
| 66865 | 9.52  | 0.02 | 7.81  | 0.04 | 7.50  | 0.25 | 3.263 down  | 4.034 down | 0.00 | 71.77   | unknown protein                                  |
| 66877 | 9.95  | 0.05 | 9.82  | 0.00 | 8.95  | 0.12 | 1.094 down  | 2.003 down | 0.00 | 104.02  | unknown protein                                  |
| 66888 | 11.01 | 0.03 | 7.44  | 0.09 | 8.61  | 0.33 | 11.913 down | 5.286 down | 0.00 | 101.58  | GT $\alpha$ -1.3-mannosyltransferase             |
| 66895 | 9.51  | 0.06 | 10.49 | 0.28 | 11.79 | 0.17 | 1.971 up    | 4.834 up   | 0.00 | 108.65  | 3' exoribonuclease                               |
| 66937 | 12.09 | 0.04 | 11.31 | 0.02 | 10.06 | 0.23 | 1.717 down  | 4.094 down | 0.00 | 95.00   | FAD binding domain-containing protein            |
| 66950 | 9.60  | 0.18 | 9.63  | 0.07 | 8.28  | 0.39 | 1.020 up    | 2.504 down | 0.01 | 17.85   | serine/threonine protein kinase.                 |
| 66999 | 5.65  | 0.04 | 5.09  | 0.19 | 8.42  | 1.00 | 1.480 down  | 6.807 up   | 0.01 | 15.61   | AMP-dependent synthetase and ligase. putative    |
| 67024 | 10.50 | 0.16 | 10.01 | 0.03 | 12.38 | 0.24 | 1.411 down  | 3.681 up   | 0.00 | 112.75  | unknown protein                                  |
| 67035 | 13.88 | 0.12 | 13.30 | 0.10 | 11.64 | 0.09 | 1.492 down  | 4.701 down | 0.00 | 407.39  | unknown protein                                  |
| 67053 | 12.27 | 0.05 | 12.09 | 0.05 | 11.17 | 0.25 | 1.132 down  | 2.145 down | 0.01 | 27.72   | Ubiquitin carboxyl-terminal hydrolase            |
| 67107 | 9.06  | 0.07 | 10.41 | 0.07 | 10.76 | 0.19 | 2.535 up    | 3.231 up   | 0.00 | 80.76   | MutS-related protein involved in mismatch repair |

|       |       |      |       |      |       |      |             |            |      |        |                                                                                     |
|-------|-------|------|-------|------|-------|------|-------------|------------|------|--------|-------------------------------------------------------------------------------------|
| 67109 | 6.13  | 0.07 | 5.76  | 0.06 | 7.93  | 0.72 | 1.288 down  | 3.491 up   | 0.02 | 12.73  | unknown protein                                                                     |
| 67133 | 11.34 | 0.20 | 10.12 | 0.26 | 9.95  | 0.40 | 2.323 down  | 2.620 down | 0.02 | 11.39  | unknown protein                                                                     |
| 67272 | 12.44 | 0.05 | 11.86 | 0.14 | 11.11 | 0.04 | 1.492 down  | 2.516 down | 0.00 | 233.49 | CRO1. required for syncytial to cellular transision. involved in sexual development |
| 67275 | 11.28 | 0.10 | 12.61 | 0.19 | 12.44 | 0.16 | 2.518 up    | 2.241 up   | 0.00 | 46.36  | RAS1                                                                                |
| 67286 | 10.78 | 0.11 | 10.42 | 0.11 | 9.04  | 0.22 | 1.279 down  | 3.345 down | 0.00 | 72.79  | unknown protein                                                                     |
| 67290 | 5.52  | 0.19 | 5.82  | 0.01 | 7.35  | 0.10 | 1.231 up    | 3.539 up   | 0.00 | 207.56 | unknown protein                                                                     |
| 67418 | 8.16  | 0.04 | 8.64  | 0.23 | 9.75  | 0.14 | 1.399 up    | 3.015 up   | 0.00 | 83.32  | C2H2 transcription factor                                                           |
| 67448 | 10.50 | 0.08 | 10.45 | 0.01 | 8.80  | 0.08 | 1.030 down  | 3.245 down | 0.00 | 529.60 | AGA_beta. Aspartylglucosaminidase family                                            |
| 67469 | 13.08 | 0.04 | 11.41 | 0.12 | 11.48 | 0.10 | 3.172 down  | 3.022 down | 0.00 | 221.51 | MFS permease (maltose permease)                                                     |
| 67494 | 14.04 | 0.10 | 13.38 | 0.23 | 11.73 | 0.28 | 1.575 down  | 4.957 down | 0.00 | 70.17  | Golgi GDP-mannose transporter                                                       |
| 67538 | 11.44 | 0.03 | 6.73  | 0.08 | 8.64  | 0.24 | 26.140 down | 6.954 down | 0.00 | 303.94 | Catalase                                                                            |
| 67579 | 9.78  | 0.27 | 8.67  | 0.02 | 11.32 | 0.96 | 2.166 down  | 2.901 up   | 0.03 | 8.79   | phospholipase A2                                                                    |
| 67600 | 2.17  | 0.16 | 2.32  | 0.14 | 4.02  | 0.04 | 1.108 up    | 3.619 up   | 0.00 | 323.80 | Fungal chitin synthase                                                              |
| 67605 | 8.90  | 0.02 | 9.11  | 0.04 | 7.09  | 0.15 | 1.152 up    | 3.525 down | 0.00 | 274.34 | unknown protein                                                                     |
| 67607 | 4.49  | 0.06 | 4.71  | 0.22 | 6.80  | 0.65 | 1.160 up    | 4.956 up   | 0.01 | 18.67  | unknown protein                                                                     |
| 67616 | 12.26 | 0.03 | 11.55 | 0.19 | 11.15 | 0.16 | 1.632 down  | 2.155 down | 0.00 | 36.56  | unknown protein                                                                     |
| 67627 | 3.25  | 0.03 | 3.30  | 0.06 | 4.66  | 0.09 | 1.034 up    | 2.664 up   | 0.00 | 358.06 | short chain dehydrognease/reductase                                                 |
| 67639 | 13.74 | 0.06 | 13.69 | 0.01 | 12.57 | 0.13 | 1.038 down  | 2.249 down | 0.00 | 118.16 | IlvB. Thiamine pyrophosphate-requiring enzymes                                      |
| 67678 | 4.34  | 0.06 | 4.61  | 0.02 | 6.49  | 0.59 | 1.211 up    | 4.457 up   | 0.01 | 19.30  | chitin deacetylase                                                                  |
| 67692 | 7.05  | 0.49 | 5.84  | 0.22 | 5.93  | 0.15 | 2.318 down  | 2.175 down | 0.02 | 13.90  | MFS permease                                                                        |
| 67698 | 4.30  | 0.13 | 4.83  | 0.29 | 5.55  | 0.19 | 1.450 up    | 2.387 up   | 0.01 | 26.61  | nucleotide sugar dehydrogenase (UDP-Glc?)                                           |
| 67699 | 10.94 | 0.14 | 7.00  | 0.09 | 9.04  | 0.37 | 15.411 down | 3.753 down | 0.00 | 88.88  | FAD/NAD-oxidoreductase. only in Hypocreaceae                                        |
| 67707 | 4.05  | 0.07 | 4.47  | 0.37 | 5.58  | 0.12 | 1.340 up    | 2.879 up   | 0.00 | 48.81  | unknown protein with TLC domain                                                     |
| 67717 | 11.97 | 0.07 | 11.28 | 0.16 | 10.15 | 0.37 | 1.614 down  | 3.520 down | 0.01 | 27.52  | unknown protein. $\beta$ -lactamase HMMPfam                                         |
| 67761 | 9.80  | 0.19 | 11.09 | 0.19 | 11.77 | 0.26 | 2.447 up    | 3.908 up   | 0.00 | 45.72  | calpain-like protease                                                               |
| 67866 | 6.71  | 0.24 | 4.75  | 0.10 | 5.42  | 0.29 | 3.890 down  | 2.442 down | 0.00 | 31.59  | unknown protein                                                                     |
| 67958 | 3.71  | 0.22 | 3.50  | 0.33 | 4.90  | 0.19 | 1.153 down  | 2.276 up   | 0.00 | 31.06  | unknown protein. only present in Magnaporthe. Chaetomium and Gibberella             |
| 67964 | 13.24 | 0.10 | 12.12 | 0.01 | 11.94 | 0.12 | 2.182 down  | 2.462 down | 0.00 | 115.86 | Cytochrome P450 CYP2 subfamily                                                      |
| 68019 | 9.98  | 0.24 | 8.75  | 0.04 | 7.87  | 0.10 | 2.337 down  | 4.319 down | 0.00 | 164.18 | beta-lactamase superfamily                                                          |
| 68028 | 8.52  | 0.05 | 8.46  | 0.09 | 7.29  | 0.27 | 1.039 down  | 2.340 down | 0.00 | 32.22  | unknown protein                                                                     |

|       |       |      |       |      |       |      |            |             |      |        |                                                               |
|-------|-------|------|-------|------|-------|------|------------|-------------|------|--------|---------------------------------------------------------------|
| 68036 | 13.49 | 0.04 | 12.84 | 0.11 | 12.27 | 0.23 | 1.572 down | 2.329 down  | 0.00 | 30.28  | Cystathionine beta-lyases/cystathionine gamma-synthases       |
| 68068 | 11.60 | 0.10 | 11.38 | 0.00 | 10.53 | 0.27 | 1.157 down | 2.086 down  | 0.01 | 20.00  | unknown protein                                               |
| 68086 | 11.08 | 0.08 | 11.15 | 0.01 | 9.31  | 0.27 | 1.050 up   | 3.395 down  | 0.00 | 73.54  | unknown protein                                               |
| 68131 | 8.23  | 0.09 | 7.75  | 0.18 | 6.87  | 0.33 | 1.392 down | 2.566 down  | 0.01 | 18.66  | heterocompatibility domain protein                            |
| 68161 | 8.39  | 0.05 | 7.20  | 0.11 | 6.22  | 0.14 | 2.279 down | 4.504 down  | 0.00 | 230.11 | Arylacetamide deacetylase                                     |
| 68169 | 8.21  | 0.14 | 6.43  | 0.03 | 6.86  | 0.32 | 3.450 down | 2.553 down  | 0.01 | 27.93  | Calcium transporter                                           |
| 68204 | 8.67  | 0.13 | 8.95  | 0.01 | 6.92  | 0.25 | 1.209 up   | 3.375 down  | 0.00 | 89.00  | NRPS                                                          |
| 68279 | 10.54 | 0.02 | 8.52  | 0.10 | 8.02  | 0.26 | 4.046 down | 5.749 down  | 0.00 | 101.46 | Short-chain dehydrogenase/reductase                           |
| 68336 | 4.58  | 0.03 | 4.81  | 0.18 | 5.90  | 0.10 | 1.171 up   | 2.489 up    | 0.00 | 114.61 | short chain dehydrogenase/reductase                           |
| 68348 | 8.57  | 0.03 | 10.86 | 0.20 | 12.10 | 0.13 | 4.893 up   | 11.521 up   | 0.00 | 466.73 | SAM-dependent methyltransferase                               |
| 68371 | 5.35  | 0.33 | 5.16  | 0.11 | 7.60  | 0.30 | 1.138 down | 4.760 up    | 0.00 | 71.66  | protein kinase. unusual                                       |
| 68401 | 3.11  | 0.06 | 3.37  | 0.01 | 4.86  | 0.10 | 1.199 up   | 3.353 up    | 0.00 | 396.73 | unknown protein                                               |
| 68455 | 10.90 | 0.08 | 10.71 | 0.02 | 9.64  | 0.11 | 1.145 down | 2.398 down  | 0.00 | 145.45 | Zn2Cys6 transcriptional regulator                             |
| 68466 | 4.51  | 0.05 | 4.42  | 0.05 | 5.76  | 0.20 | 1.060 down | 2.389 up    | 0.00 | 66.70  | glycerone kinase                                              |
| 68508 | 9.81  | 0.16 | 9.83  | 0.09 | 8.40  | 0.21 | 1.011 up   | 2.661 down  | 0.00 | 60.28  | unknown protein                                               |
| 68574 | 9.77  | 0.27 | 6.82  | 0.02 | 8.03  | 0.37 | 7.717 down | 3.343 down  | 0.00 | 45.98  | unknown protein                                               |
| 68590 | 10.65 | 0.02 | 9.87  | 0.06 | 9.28  | 0.22 | 1.715 down | 2.584 down  | 0.00 | 41.55  | Alcohol dehydrogenase. class V                                |
| 68608 | 14.73 | 0.13 | 14.40 | 0.00 | 13.41 | 0.20 | 1.260 down | 2.507 down  | 0.00 | 50.55  | Thiazole biosynthetic enzyme (Stress-inducible protein sti35) |
| 68636 | 10.94 | 0.25 | 11.38 | 0.17 | 12.13 | 0.22 | 1.349 up   | 2.275 up    | 0.01 | 22.75  | ribosomal protein S11                                         |
| 68640 | 7.38  | 0.20 | 7.79  | 0.10 | 8.43  | 0.40 | 1.331 up   | 2.079 up    | 0.04 | 7.47   | unknown protein                                               |
| 68705 | 12.22 | 0.04 | 12.33 | 0.05 | 7.10  | 0.64 | 1.079 up   | 34.693 down | 0.00 | 107.87 | cytochrome P450 monooxygenase                                 |
| 68755 | 12.56 | 0.08 | 10.20 | 0.13 | 9.23  | 0.25 | 5.158 down | 10.057 down | 0.00 | 174.06 | short chain dehydrogenase/reductase                           |
| 68813 | 13.41 | 0.05 | 11.72 | 0.01 | 11.85 | 0.55 | 3.217 down | 2.939 down  | 0.02 | 10.71  | MFS permease                                                  |
| 68889 | 11.28 | 0.07 | 10.37 | 0.11 | 9.31  | 0.16 | 1.881 down | 3.905 down  | 0.00 | 143.70 | PDR-type ABC transporters                                     |
| 68924 | 9.09  | 0.07 | 12.02 | 0.03 | 13.14 | 1.18 | 7.616 up   | 16.584 up   | 0.02 | 13.09  | cyclopropane/fatty acid synthase; plant related               |
| 68925 | 8.24  | 0.13 | 8.16  | 0.01 | 6.94  | 0.08 | 1.051 down | 2.454 down  | 0.00 | 215.72 | MFS permease                                                  |
| 68927 | 10.73 | 0.07 | 10.82 | 0.05 | 9.55  | 0.18 | 1.069 up   | 2.266 down  | 0.00 | 75.12  | unknown protein                                               |
| 68966 | 9.54  | 0.01 | 9.50  | 0.12 | 8.50  | 0.47 | 1.034 down | 2.063 down  | 0.04 | 7.67   | flavoprotein. putative                                        |
| 68990 | 13.19 | 0.08 | 13.51 | 0.08 | 11.36 | 0.96 | 1.242 up   | 3.578 down  | 0.05 | 7.29   | MFS permease                                                  |
| 69026 | 9.36  | 0.19 | 9.05  | 0.16 | 8.30  | 0.38 | 1.237 down | 2.080 down  | 0.04 | 8.71   | MFS permease                                                  |

|       |       |      |       |      |       |      |            |            |      |        |                                                                                      |
|-------|-------|------|-------|------|-------|------|------------|------------|------|--------|--------------------------------------------------------------------------------------|
| 69131 | 11.42 | 0.05 | 11.28 | 0.09 | 10.41 | 0.14 | 1.105 down | 2.018 down | 0.00 | 61.91  | Unknown protein with FYVE/PHD zinc finger domain.                                    |
| 69171 | 10.08 | 0.14 | 9.29  | 0.10 | 11.73 | 0.46 | 1.728 down | 3.127 up   | 0.00 | 33.51  | unknown protein                                                                      |
| 69181 | 2.95  | 0.10 | 2.78  | 0.21 | 4.78  | 0.13 | 1.129 down | 3.553 up   | 0.00 | 176.34 | unknown protein                                                                      |
| 69210 | 3.36  | 0.17 | 3.32  | 0.13 | 5.14  | 0.21 | 1.031 down | 3.440 up   | 0.00 | 92.13  | FoNIIA                                                                               |
| 69228 | 13.23 | 0.02 | 13.10 | 0.11 | 11.83 | 0.14 | 1.094 down | 2.637 down | 0.00 | 119.53 | BioA Adenosylmethionine--amino--oxononanoate aminotransferase                        |
| 69245 | 11.63 | 0.00 | 9.06  | 0.20 | 10.44 | 0.21 | 5.937 down | 2.282 down | 0.00 | 97.99  | GH2 $\beta$ -mannosidase                                                             |
| 69257 | 8.19  | 0.05 | 8.62  | 0.00 | 9.40  | 0.39 | 1.344 up   | 2.311 up   | 0.02 | 11.97  | Peptidase M22. glycoprotease                                                         |
| 69276 | 7.51  | 0.17 | 5.98  | 0.09 | 11.81 | 0.72 | 2.896 down | 19.619 up  | 0.00 | 84.77  | GH30 endo- $\beta$ -1.4-xylanase                                                     |
| 69282 | 10.89 | 0.01 | 9.07  | 0.10 | 8.79  | 0.21 | 3.538 down | 4.297 down | 0.00 | 109.56 | monocarboxylate transporter                                                          |
| 69287 | 12.44 | 0.09 | 12.84 | 0.12 | 13.83 | 0.13 | 1.318 up   | 2.617 up   | 0.00 | 104.55 | unknown protein                                                                      |
| 69291 | 3.15  | 0.18 | 3.27  | 0.04 | 4.64  | 0.29 | 1.081 up   | 2.804 up   | 0.00 | 36.18  | FoNIIA                                                                               |
| 69303 | 7.40  | 0.01 | 10.33 | 0.01 | 9.60  | 0.39 | 7.661 up   | 4.594 up   | 0.00 | 54.45  | unknown protein                                                                      |
| 69362 | 11.97 | 0.06 | 11.86 | 0.19 | 10.34 | 0.30 | 1.078 down | 3.080 down | 0.00 | 39.09  | phospholipase A2 protein family                                                      |
| 69375 | 9.24  | 0.17 | 7.03  | 0.04 | 8.18  | 0.53 | 4.623 down | 2.086 down | 0.02 | 14.06  | unknown protein                                                                      |
| 69384 | 11.42 | 0.00 | 10.75 | 0.01 | 10.04 | 0.17 | 1.593 down | 2.602 down | 0.00 | 78.94  | unknown protein                                                                      |
| 69399 | 11.51 | 0.09 | 12.09 | 0.11 | 12.83 | 0.02 | 1.500 up   | 2.501 up   | 0.00 | 283.31 | mitochondrial 40S ribosomal protein [Aspergillus niger]. Possible homologue of yeast |
| 69416 | 11.65 | 0.12 | 11.70 | 0.08 | 10.48 | 0.15 | 1.030 up   | 2.247 down | 0.00 | 85.66  | unknown protein                                                                      |
| 69426 | 8.97  | 0.18 | 7.66  | 0.15 | 7.56  | 0.44 | 2.487 down | 2.651 down | 0.02 | 11.05  | copper transporter                                                                   |
| 69479 | 8.65  | 0.09 | 8.88  | 0.02 | 7.57  | 0.30 | 1.180 up   | 2.111 down | 0.01 | 26.18  | unknown protein                                                                      |
| 69486 | 3.20  | 0.07 | 3.44  | 0.03 | 5.14  | 0.28 | 1.179 up   | 3.826 up   | 0.00 | 70.12  | unknown protein                                                                      |
| 69490 | 4.21  | 0.14 | 4.15  | 0.06 | 6.08  | 0.38 | 1.036 down | 3.654 up   | 0.00 | 40.07  | CE4 chitin deacetylase                                                               |
| 69528 | 8.24  | 0.15 | 9.90  | 0.11 | 9.57  | 0.12 | 3.159 up   | 2.513 up   | 0.00 | 107.18 | unknown protein                                                                      |
| 69555 | 4.41  | 0.28 | 4.56  | 0.22 | 6.31  | 0.25 | 1.111 up   | 3.726 up   | 0.00 | 51.60  | aspartyl protease. Aspergillopepsin-like                                             |
| 69569 | 4.22  | 0.52 | 5.41  | 0.03 | 5.48  | 0.19 | 2.283 up   | 2.392 up   | 0.01 | 15.15  | unknown protein                                                                      |
| 69574 | 13.48 | 0.05 | 13.03 | 0.03 | 10.72 | 0.21 | 1.370 down | 6.767 down | 0.00 | 234.91 | MFS permease                                                                         |
| 69648 | 3.99  | 0.43 | 3.45  | 0.17 | 6.15  | 0.54 | 1.449 down | 4.473 up   | 0.01 | 28.16  | Cytochrome P450 CYP11/CYP12/CYP24/CYP27 subfamilies                                  |
| 69679 | 3.34  | 0.03 | 3.47  | 0.16 | 5.00  | 0.12 | 1.091 up   | 3.165 up   | 0.00 | 183.81 | ABC transporter                                                                      |
| 69688 | 3.08  | 0.14 | 3.24  | 0.10 | 5.09  | 0.17 | 1.121 up   | 4.039 up   | 0.00 | 158.03 | unknown protein                                                                      |
| 69692 | 4.44  | 0.14 | 5.08  | 0.25 | 8.85  | 0.75 | 1.557 up   | 21.254 up  | 0.00 | 47.42  | Quinoprotein amine dehydrogenase beta chain-like protein                             |
| 69695 | 10.00 | 0.03 | 9.83  | 0.08 | 6.78  | 0.46 | 1.123 down | 9.330 down | 0.00 | 76.87  | Zn2Cys6 transcriptional regulator                                                    |

|       |       |      |       |      |       |      |            |            |      |         |                                                                            |
|-------|-------|------|-------|------|-------|------|------------|------------|------|---------|----------------------------------------------------------------------------|
| 69696 | 5.14  | 0.24 | 5.11  | 0.06 | 7.17  | 0.59 | 1.023 down | 4.071 up   | 0.01 | 19.07   | coenzyme F420-dependent N5,N10-methylene tetrahydromethanopterin reductase |
| 69712 | 3.16  | 0.15 | 2.75  | 0.29 | 4.24  | 0.14 | 1.328 down | 2.110 up   | 0.00 | 52.12   | MFS permease                                                               |
| 69742 | 5.51  | 0.21 | 6.65  | 0.16 | 8.54  | 0.28 | 2.206 up   | 8.201 up   | 0.00 | 110.41  | esterase                                                                   |
| 69751 | 8.28  | 0.00 | 9.16  | 0.14 | 6.72  | 0.59 | 1.838 up   | 2.952 down | 0.01 | 20.92   | GH16                                                                       |
| 69757 | 9.89  | 0.04 | 10.62 | 0.08 | 10.94 | 0.17 | 1.663 up   | 2.068 up   | 0.00 | 37.27   | Peptidyl-tRNA hydrolase                                                    |
| 69777 | 7.40  | 0.29 | 8.26  | 0.13 | 9.20  | 0.14 | 1.812 up   | 3.486 up   | 0.00 | 70.44   | unknown protein                                                            |
| 69805 | 3.91  | 0.04 | 3.84  | 0.12 | 5.16  | 0.13 | 1.046 down | 2.384 up   | 0.00 | 119.57  | unknown protein                                                            |
| 69811 | 8.80  | 0.19 | 10.17 | 0.09 | 5.90  | 0.28 | 2.584 up   | 7.460 down | 0.00 | 246.69  | $\gamma$ -glutamyltransferase                                              |
| 69816 | 7.98  | 0.01 | 8.20  | 0.02 | 9.29  | 0.11 | 1.168 up   | 2.477 up   | 0.00 | 197.99  | aminoglycoside 3-N-acetyltransferase                                       |
| 69825 | 8.08  | 0.29 | 9.31  | 0.02 | 9.28  | 0.24 | 2.347 up   | 2.300 up   | 0.01 | 21.11   | unknown protein                                                            |
| 69841 | 11.97 | 0.06 | 11.96 | 0.01 | 10.38 | 0.22 | 1.006 down | 3.008 down | 0.00 | 84.58   | unknown protein                                                            |
| 69857 | 7.36  | 0.00 | 7.10  | 0.13 | 8.41  | 0.47 | 1.198 down | 2.075 up   | 0.02 | 10.71   | unknown protein                                                            |
| 69868 | 5.58  | 0.09 | 6.15  | 0.26 | 7.98  | 0.42 | 1.493 up   | 5.306 up   | 0.00 | 39.03   | GDP-mannose a-mannosyltransferases;Distant relative                        |
| 69870 | 3.28  | 0.09 | 3.36  | 0.05 | 4.97  | 0.25 | 1.058 up   | 3.223 up   | 0.00 | 66.76   | FAD monooxygenase                                                          |
| 69879 | 10.38 | 0.01 | 11.22 | 0.15 | 11.45 | 0.17 | 1.796 up   | 2.098 up   | 0.00 | 36.70   | unknown protein                                                            |
| 69881 | 3.36  | 0.11 | 3.48  | 0.03 | 4.73  | 0.22 | 1.086 up   | 2.584 up   | 0.00 | 53.35   | Dit1p. spore wall maturation                                               |
| 69883 | 4.12  | 0.33 | 3.48  | 0.40 | 5.28  | 0.21 | 1.557 down | 2.245 up   | 0.00 | 29.84   | cytochrome P450. putative                                                  |
| 69885 | 10.40 | 0.04 | 8.15  | 0.07 | 9.31  | 0.45 | 4.762 down | 2.134 down | 0.01 | 20.83   | initiation factor 2B                                                       |
| 69896 | 3.00  | 0.17 | 2.72  | 0.27 | 4.97  | 0.14 | 1.209 down | 3.938 up   | 0.00 | 143.98  | alpha/beta hydrolase                                                       |
| 69901 | 3.40  | 0.07 | 3.02  | 0.01 | 4.60  | 0.03 | 1.300 down | 2.309 up   | 0.00 | 1125.08 | unknown protein                                                            |
| 69920 | 3.63  | 0.16 | 3.71  | 0.01 | 4.93  | 0.12 | 1.058 up   | 2.467 up   | 0.00 | 114.94  | unknown protein                                                            |
| 69928 | 3.47  | 0.08 | 3.63  | 0.13 | 5.25  | 0.11 | 1.113 up   | 3.432 up   | 0.00 | 249.27  | unknown protein                                                            |
| 69933 | 10.15 | 0.10 | 10.40 | 0.06 | 8.71  | 0.15 | 1.185 up   | 2.711 down | 0.00 | 152.19  | unknown protein                                                            |
| 69944 | 6.24  | 0.24 | 4.51  | 0.30 | 7.87  | 0.21 | 3.310 down | 3.091 up   | 0.00 | 136.78  | GH31 $\alpha$ -xylosidase/ $\alpha$ -glucosidase                           |
| 69946 | 11.99 | 0.07 | 10.08 | 0.12 | 10.39 | 0.48 | 3.780 down | 3.042 down | 0.01 | 15.77   | NRPS. siderophore synthase                                                 |
| 69950 | 4.41  | 0.06 | 4.82  | 0.02 | 5.81  | 0.19 | 1.329 up   | 2.635 up   | 0.00 | 67.30   | unknown protein                                                            |
| 69956 | 8.78  | 0.15 | 5.90  | 0.28 | 7.49  | 0.55 | 7.346 down | 2.442 down | 0.01 | 20.76   | Alcohol dehydrogenase. class V                                             |
| 69972 | 11.66 | 0.18 | 11.21 | 0.18 | 9.45  | 0.16 | 1.364 down | 4.630 down | 0.00 | 144.76  | Zn2Cys6 transcriptional regulator                                          |
| 70017 | 10.40 | 0.17 | 10.91 | 0.16 | 12.85 | 0.40 | 1.423 up   | 5.487 up   | 0.00 | 46.97   | mitochondrial ribosomal protein S19/S15.                                   |
| 70021 | 6.18  | 0.02 | 5.85  | 0.05 | 7.25  | 0.23 | 1.259 down | 2.096 up   | 0.00 | 47.30   | CE3 acetyl xylan Esterase                                                  |

|       |       |      |       |      |       |      |             |             |      |        |                                                                |
|-------|-------|------|-------|------|-------|------|-------------|-------------|------|--------|----------------------------------------------------------------|
| 70025 | 13.16 | 0.04 | 12.65 | 0.04 | 10.78 | 0.19 | 1.429 down  | 5.203 down  | 0.00 | 196.82 | alcohol dehydrogenase. zinc-containing. putative               |
| 70092 | 9.13  | 0.40 | 8.33  | 0.30 | 7.73  | 0.19 | 1.736 down  | 2.636 down  | 0.01 | 18.18  | unknown protein                                                |
| 70096 | 9.51  | 0.03 | 10.55 | 0.23 | 10.76 | 0.16 | 2.064 up    | 2.380 up    | 0.00 | 40.88  | Gβ-WD40 domain protein                                         |
| 70098 | 11.17 | 0.01 | 10.10 | 0.15 | 7.75  | 0.36 | 2.102 down  | 10.727 down | 0.00 | 109.06 | amino acid permease (GABA)                                     |
| 70108 | 9.23  | 0.07 | 8.85  | 0.11 | 7.01  | 0.25 | 1.302 down  | 4.649 down  | 0.00 | 101.37 | MFS permease                                                   |
| 70186 | 5.06  | 0.23 | 4.57  | 0.29 | 6.72  | 0.49 | 1.405 down  | 3.155 up    | 0.01 | 21.99  | GH28 polygalacturonase/xylogalacturonan hydrolase              |
| 70195 | 3.38  | 0.05 | 3.36  | 0.12 | 4.52  | 0.09 | 1.016 down  | 2.210 up    | 0.00 | 158.57 | unknown protein                                                |
| 70197 | 11.15 | 0.01 | 5.60  | 0.18 | 9.84  | 0.19 | 46.788 down | 2.467 down  | 0.00 | 617.37 | Zn-dependent β-lactamase                                       |
| 70327 | 5.46  | 0.61 | 5.91  | 0.13 | 7.14  | 0.39 | 1.369 up    | 3.210 up    | 0.02 | 13.23  | unknown protein                                                |
| 70334 | 10.11 | 0.04 | 8.65  | 0.30 | 6.98  | 0.81 | 2.761 down  | 8.772 down  | 0.01 | 16.47  | short chain dehydrogenase/reductase                            |
| 70339 | 4.26  | 0.23 | 4.10  | 0.10 | 5.40  | 0.24 | 1.120 down  | 2.200 up    | 0.00 | 31.06  | cytochrome P450 monooxygenase (trichothecene C-15 hydroxylase) |
| 70349 | 12.45 | 0.04 | 10.46 | 0.05 | 9.34  | 0.36 | 3.978 down  | 8.651 down  | 0.00 | 80.55  | MFS permease LIZ1                                              |
| 70355 | 13.53 | 0.04 | 10.95 | 0.08 | 9.32  | 0.37 | 5.994 down  | 18.605 down | 0.00 | 139.38 | SAM-dependent methyltransferase                                |
| 70365 | 10.54 | 0.08 | 6.53  | 0.12 | 7.16  | 0.48 | 16.042 down | 10.414 down | 0.00 | 69.55  | unknown protein                                                |
| 70373 | 12.92 | 0.17 | 12.05 | 0.00 | 10.33 | 0.27 | 1.837 down  | 6.019 down  | 0.00 | 98.16  | unknown protein                                                |
| 70375 | 11.87 | 0.01 | 10.13 | 0.13 | 8.22  | 0.38 | 3.347 down  | 12.561 down | 0.00 | 101.32 | amidase                                                        |
| 70383 | 11.28 | 0.18 | 10.42 | 0.10 | 9.02  | 0.36 | 1.814 down  | 4.805 down  | 0.00 | 43.16  | succinate semialdehyde dehydrogenase. NADP                     |
| 70400 | 4.57  | 0.27 | 4.75  | 0.12 | 6.19  | 0.53 | 1.135 up    | 3.069 up    | 0.02 | 12.68  | unknown protein                                                |
| 70414 | 9.68  | 0.10 | 9.46  | 0.11 | 7.93  | 0.31 | 1.160 down  | 3.363 down  | 0.00 | 44.28  | Zn2Cys6 transcriptional regulator                              |
| 70439 | 10.54 | 0.06 | 11.54 | 0.13 | 11.87 | 0.25 | 1.997 up    | 2.507 up    | 0.00 | 29.12  | NADH-ubiquinone oxidoreductase                                 |
| 70491 | 11.78 | 0.16 | 5.64  | 0.54 | 10.47 | 0.08 | 70.700 down | 2.492 down  | 0.00 | 329.23 | esterase/lipase                                                |
| 70570 | 9.59  | 0.10 | 9.65  | 0.07 | 7.89  | 0.22 | 1.047 up    | 3.243 down  | 0.00 | 91.82  | Zn2Cys6 transcriptional regulator                              |
| 70599 | 4.79  | 0.01 | 5.12  | 0.07 | 6.19  | 0.19 | 1.258 up    | 2.636 up    | 0.00 | 68.71  | unknown protein                                                |
| 70600 | 7.64  | 0.14 | 3.51  | 0.13 | 4.67  | 0.08 | 17.584 down | 7.834 down  | 0.00 | 814.33 | catalase. large subunit type                                   |
| 70608 | 12.03 | 0.00 | 7.00  | 0.03 | 8.32  | 0.65 | 32.737 down | 13.100 down | 0.00 | 55.95  | unknown protein. HHE domains                                   |
| 70630 | 13.50 | 0.01 | 13.46 | 0.07 | 12.46 | 0.06 | 1.033 down  | 2.060 down  | 0.00 | 358.12 | homoserine acetyltransferase family protein                    |
| 70631 | 5.02  | 0.30 | 4.79  | 0.05 | 6.21  | 0.19 | 1.175 down  | 2.285 up    | 0.00 | 44.04  | dipeptidyl peptidase 5                                         |
| 70803 | 9.92  | 0.09 | 8.92  | 0.11 | 12.17 | 0.09 | 2.003 down  | 4.754 up    | 0.00 | 896.65 | bifunctional catalase/peroxidase                               |
| 70829 | 10.01 | 0.06 | 9.05  | 0.06 | 7.40  | 0.33 | 1.944 down  | 6.140 down  | 0.00 | 75.50  | MFS multidrug transporter. putative                            |
| 70830 | 9.31  | 0.01 | 9.67  | 0.10 | 8.10  | 0.20 | 1.280 up    | 2.310 down  | 0.00 | 73.93  | MFS permease                                                   |

|       |       |      |       |      |       |      |            |             |      |        |                                                                      |
|-------|-------|------|-------|------|-------|------|------------|-------------|------|--------|----------------------------------------------------------------------|
| 70837 | 3.91  | 0.09 | 4.52  | 0.26 | 4.97  | 0.24 | 1.519 up   | 2.084 up    | 0.01 | 14.75  | E3 ubiquitin ligase                                                  |
| 70842 | 9.42  | 0.32 | 8.29  | 0.00 | 7.04  | 0.22 | 2.181 down | 5.192 down  | 0.00 | 79.52  | Cytochrome P450 CYP2 subfamily                                       |
| 70845 | 9.04  | 0.11 | 10.70 | 0.06 | 11.59 | 0.16 | 3.171 up   | 5.855 up    | 0.00 | 225.01 | GH55 $\beta$ -1.3-glucanase                                          |
| 70855 | 7.71  | 0.04 | 8.41  | 0.05 | 8.75  | 0.17 | 1.629 up   | 2.052 up    | 0.00 | 38.21  | unknown protein                                                      |
| 70859 | 12.75 | 0.14 | 10.64 | 0.08 | 10.34 | 0.27 | 4.320 down | 5.344 down  | 0.00 | 82.25  | amidase                                                              |
| 70894 | 12.76 | 0.12 | 10.28 | 0.11 | 11.00 | 0.19 | 5.560 down | 3.395 down  | 0.00 | 124.59 | unknown protein                                                      |
| 70907 | 10.29 | 0.16 | 12.14 | 0.05 | 12.50 | 0.15 | 3.594 up   | 4.621 up    | 0.00 | 169.89 | Ankyrin                                                              |
| 70910 | 11.55 | 0.25 | 10.54 | 0.12 | 8.04  | 0.39 | 2.008 down | 11.340 down | 0.00 | 89.78  | GMC oxidoreductase                                                   |
| 70918 | 4.01  | 0.13 | 3.94  | 0.15 | 7.04  | 0.63 | 1.053 down | 8.118 up    | 0.00 | 37.99  | unknown protein                                                      |
| 70919 | 5.81  | 0.07 | 7.64  | 0.25 | 7.57  | 0.16 | 3.550 up   | 3.373 up    | 0.00 | 83.83  | SSCRP                                                                |
| 70921 | 5.99  | 0.14 | 5.56  | 0.06 | 7.92  | 0.40 | 1.347 down | 3.785 up    | 0.00 | 46.34  | unknown protein                                                      |
| 70923 | 8.68  | 0.00 | 9.31  | 0.13 | 7.26  | 0.09 | 1.543 up   | 2.682 down  | 0.00 | 367.09 | unknown protein. only in fungi                                       |
| 70927 | 3.16  | 0.10 | 3.31  | 0.00 | 4.89  | 0.14 | 1.116 up   | 3.319 up    | 0.00 | 203.65 | unknown protein                                                      |
| 70932 | 10.28 | 0.11 | 9.93  | 0.01 | 9.24  | 0.29 | 1.280 down | 2.064 down  | 0.01 | 15.03  | MFS permease                                                         |
| 70943 | 10.48 | 0.05 | 10.30 | 0.00 | 9.47  | 0.31 | 1.137 down | 2.022 down  | 0.01 | 14.90  | Histidine kinase. part of a two component signal transduction system |
| 70956 | 7.25  | 0.06 | 5.04  | 0.39 | 5.53  | 0.28 | 4.615 down | 3.284 down  | 0.00 | 35.89  | cytochrome P450 monooxygenase                                        |
| 70961 | 10.69 | 0.08 | 9.65  | 0.07 | 9.32  | 0.42 | 2.050 down | 2.579 down  | 0.02 | 11.57  | dienelactone hydrolase                                               |
| 70962 | 2.90  | 0.14 | 2.90  | 0.04 | 4.90  | 0.03 | 1.001 up   | 4.010 up    | 0.00 | 782.85 | tripeptide peptidase                                                 |
| 70973 | 3.03  | 0.24 | 2.84  | 0.08 | 4.03  | 0.17 | 1.142 down | 2.000 up    | 0.00 | 39.81  | 4-aminobutyrate aminotransferase                                     |
| 70991 | 5.83  | 0.11 | 7.99  | 0.09 | 7.65  | 0.31 | 4.481 up   | 3.539 up    | 0.00 | 46.14  | unknown protein. ThiJ/Pfpl domain                                    |
| 70996 | 6.37  | 0.24 | 6.68  | 0.16 | 7.52  | 0.25 | 1.238 up   | 2.219 up    | 0.01 | 19.64  | SSCRP                                                                |
| 71010 | 7.98  | 0.08 | 6.89  | 0.16 | 5.82  | 0.14 | 2.126 down | 4.473 down  | 0.00 | 173.68 | MDR-type ABC transporters                                            |
| 71029 | 10.94 | 0.06 | 12.79 | 0.26 | 14.14 | 0.26 | 3.606 up   | 9.178 up    | 0.00 | 128.82 | Ctr copper transporter. putative                                     |
| 71059 | 9.70  | 0.14 | 9.20  | 0.12 | 8.55  | 0.45 | 1.410 down | 2.224 down  | 0.05 | 7.42   | MFS permease                                                         |
| 71072 | 7.07  | 0.36 | 4.76  | 0.11 | 5.14  | 0.20 | 4.958 down | 3.818 down  | 0.00 | 61.33  | Gluconate kinase                                                     |
| 71076 | 2.98  | 0.31 | 3.11  | 0.04 | 4.72  | 0.24 | 1.093 up   | 3.337 up    | 0.00 | 52.85  | estrerase/lipase                                                     |
| 71078 | 2.56  | 0.14 | 2.61  | 0.07 | 4.17  | 0.10 | 1.038 up   | 3.064 up    | 0.00 | 227.56 | Ca/CaM-dependent kinase-1                                            |
| 71080 | 9.42  | 0.16 | 9.01  | 0.04 | 7.51  | 0.16 | 1.325 down | 3.746 down  | 0.00 | 140.87 | Zn2Cys6 transcriptional regulator                                    |
| 71092 | 10.34 | 0.02 | 11.78 | 0.18 | 12.80 | 0.22 | 2.724 up   | 5.525 up    | 0.00 | 118.89 | phytase                                                              |
| 71094 | 8.58  | 0.08 | 10.76 | 0.04 | 7.22  | 0.39 | 4.531 up   | 2.569 down  | 0.00 | 92.03  | Intradiol ring-cleavage dioxygenase                                  |



|       |       |      |       |      |       |      |             |            |      |         |                                                           |
|-------|-------|------|-------|------|-------|------|-------------|------------|------|---------|-----------------------------------------------------------|
| 71095 | 4.58  | 0.09 | 4.96  | 0.07 | 6.55  | 0.29 | 1.300 up    | 3.922 up   | 0.00 | 60.55   | Aldehyde dehydrogenase                                    |
| 71101 | 5.37  | 0.40 | 5.38  | 0.17 | 7.84  | 0.29 | 1.010 up    | 5.575 up   | 0.00 | 67.98   | enoyl-CoA hydratase/isomerase                             |
| 71103 | 2.80  | 0.00 | 3.16  | 0.09 | 4.46  | 0.07 | 1.281 up    | 3.159 up   | 0.00 | 490.87  | dynamin GTPase. putative                                  |
| 71123 | 7.27  | 0.05 | 8.13  | 0.00 | 10.42 | 0.33 | 1.810 up    | 8.852 up   | 0.00 | 121.11  | unknown protein                                           |
| 71125 | 3.77  | 0.12 | 3.85  | 0.14 | 5.65  | 0.38 | 1.057 up    | 3.678 up   | 0.00 | 35.72   | unknown protein                                           |
| 71146 | 3.35  | 0.04 | 3.51  | 0.60 | 4.94  | 0.38 | 1.114 up    | 3.012 up   | 0.02 | 14.48   | unknown protein                                           |
| 71154 | 5.27  | 0.47 | 5.49  | 0.21 | 6.53  | 0.29 | 1.158 up    | 2.392 up   | 0.02 | 13.04   | unknown protein                                           |
| 71166 | 3.94  | 0.40 | 4.03  | 0.21 | 6.27  | 0.28 | 1.061 up    | 5.009 up   | 0.00 | 59.23   | unknown protein                                           |
| 71167 | 2.85  | 0.42 | 2.59  | 0.09 | 4.56  | 0.14 | 1.202 down  | 3.268 up   | 0.00 | 68.95   | SSCRP                                                     |
| 71173 | 3.53  | 0.14 | 4.15  | 0.04 | 5.26  | 0.12 | 1.536 up    | 3.313 up   | 0.00 | 175.88  | unknown protein                                           |
| 71180 | 6.22  | 0.05 | 6.74  | 0.00 | 8.02  | 0.44 | 1.436 up    | 3.483 up   | 0.01 | 21.50   | unknown protein                                           |
| 71192 | 3.67  | 0.54 | 3.69  | 0.17 | 6.39  | 0.51 | 1.010 up    | 6.576 up   | 0.00 | 32.88   | unknown protein                                           |
| 71196 | 5.10  | 0.16 | 5.49  | 0.01 | 6.57  | 0.44 | 1.308 up    | 2.759 up   | 0.02 | 14.03   | unknown protein                                           |
| 71212 | 5.47  | 0.23 | 5.54  | 0.23 | 7.16  | 0.34 | 1.050 up    | 3.241 up   | 0.00 | 30.06   | unique protein                                            |
| 71245 | 4.32  | 0.20 | 4.74  | 0.04 | 5.50  | 0.43 | 1.341 up    | 2.270 up   | 0.04 | 8.63    | GH18. chitinase CHI18-1                                   |
| 71390 | 5.86  | 0.08 | 5.94  | 0.22 | 7.03  | 0.35 | 1.059 up    | 2.255 up   | 0.01 | 15.50   | MRSP1/expansin-like                                       |
| 71399 | 12.72 | 0.02 | 11.50 | 0.01 | 11.62 | 0.11 | 2.328 down  | 2.149 down | 0.00 | 134.28  | endo-1.3- $\beta$ -glucanase                              |
| 71532 | 12.29 | 0.03 | 8.50  | 0.08 | 10.57 | 0.09 | 13.909 down | 3.294 down | 0.00 | 1106.21 | GH71 $\alpha$ -1 3-glucanase                              |
| 71554 | 3.71  | 0.25 | 3.59  | 0.13 | 5.35  | 0.12 | 1.084 down  | 3.111 up   | 0.00 | 115.03  | GH5 $\beta$ -1.3-mannanase/endo- $\beta$ -1.4-mannosidase |
| 71556 | 7.46  | 0.10 | 5.79  | 0.05 | 5.63  | 0.14 | 3.190 down  | 3.546 down | 0.00 | 168.22  | unknown protein                                           |
| 72071 | 5.70  | 0.37 | 5.95  | 0.16 | 7.48  | 0.62 | 1.184 up    | 3.438 up   | 0.02 | 10.72   | Carbohydrate-Binding Module Family 13                     |
| 72072 | 9.59  | 0.17 | 7.82  | 0.04 | 8.56  | 0.28 | 3.402 down  | 2.039 down | 0.00 | 29.57   | CE1 esterase (PHB?)                                       |
| 72183 | 8.58  | 0.17 | 10.25 | 0.13 | 7.50  | 0.15 | 3.161 up    | 2.115 down | 0.00 | 228.09  | SSCRP                                                     |
| 72488 | 9.32  | 0.14 | 9.94  | 0.15 | 8.07  | 0.32 | 1.527 up    | 2.387 down | 0.00 | 37.87   | GH95 $\alpha$ -L-fucosidase                               |
| 72567 | 12.99 | 0.15 | 9.03  | 0.15 | 15.25 | 0.15 | 15.565 down | 4.797 up   | 0.00 | 1107.20 | GH6 Cellobiohydrolase CEL6A/CBH2                          |
| 72581 | 8.82  | 0.34 | 7.71  | 0.09 | 11.40 | 0.21 | 2.158 down  | 5.960 up   | 0.00 | 201.13  | unknown protein                                           |
| 72602 | 12.02 | 0.21 | 11.09 | 0.08 | 10.62 | 0.05 | 1.905 down  | 2.632 down | 0.00 | 111.61  | ribosomal protein P2.                                     |
| 72605 | 4.31  | 0.34 | 4.06  | 0.18 | 5.70  | 0.25 | 1.190 down  | 2.628 up   | 0.00 | 35.55   | GPCR. secretin like                                       |
| 72611 | 13.77 | 0.12 | 13.30 | 0.08 | 11.31 | 0.40 | 1.386 down  | 5.511 down | 0.00 | 50.81   | Zn2Cys6 transcriptional regulator                         |
| 72612 | 11.50 | 0.06 | 10.43 | 0.12 | 9.70  | 0.26 | 2.100 down  | 3.496 down | 0.00 | 50.55   | acetylornithine deacetylase                               |

|       |       |      |       |      |       |      |             |             |      |         |                                                   |
|-------|-------|------|-------|------|-------|------|-------------|-------------|------|---------|---------------------------------------------------|
| 72627 | 9.44  | 0.11 | 9.83  | 0.07 | 7.01  | 0.32 | 1.309 up    | 5.418 down  | 0.00 | 109.17  | GPCR. secretin like                               |
| 72632 | 11.70 | 0.02 | 9.17  | 0.11 | 8.11  | 0.54 | 5.777 down  | 12.000 down | 0.00 | 48.17   | GH27 $\alpha$ -galactosidase AGL1                 |
| 72896 | 12.26 | 0.03 | 12.61 | 0.14 | 13.46 | 0.09 | 1.277 up    | 2.294 up    | 0.00 | 122.74  | Dolichol-phosphate (beta-D) mannosyltransferase 2 |
| 72907 | 7.94  | 0.00 | 7.83  | 0.16 | 6.34  | 0.42 | 1.083 down  | 3.047 down  | 0.01 | 21.46   | unknown protein with WSC domain                   |
| 72922 | 12.41 | 0.00 | 8.98  | 0.13 | 9.52  | 0.07 | 10.758 down | 7.407 down  | 0.00 | 1110.16 | amino acid permease (GABA)                        |
| 73005 | 2.66  | 0.02 | 2.75  | 0.00 | 4.49  | 0.09 | 1.061 up    | 3.560 up    | 0.00 | 637.33  | GH79 $\beta$ -glucuronidase                       |
| 73016 | 3.02  | 0.01 | 3.20  | 0.05 | 5.41  | 0.13 | 1.132 up    | 5.225 up    | 0.00 | 508.13  | aryl-alcohol oxidase                              |
| 73023 | 3.43  | 0.02 | 3.45  | 0.15 | 4.99  | 0.16 | 1.013 up    | 2.949 up    | 0.00 | 116.79  | unknown protein                                   |
| 73024 | 4.22  | 0.35 | 4.97  | 0.05 | 6.61  | 0.66 | 1.673 up    | 5.217 up    | 0.01 | 15.20   | unknown protein                                   |
| 73039 | 7.30  | 0.29 | 6.89  | 0.19 | 5.33  | 0.23 | 1.333 down  | 3.926 down  | 0.00 | 58.14   | APHPhosphotransferase enzyme family aligned       |
| 73048 | 13.24 | 0.10 | 14.22 | 0.14 | 14.75 | 0.06 | 1.975 up    | 2.846 up    | 0.00 | 187.40  | unknown protein                                   |
| 73101 | 4.81  | 0.12 | 4.67  | 0.19 | 6.29  | 0.12 | 1.099 down  | 2.796 up    | 0.00 | 131.44  | glucan endo-1.3-1.4- $\beta$ -D-glucosidase       |
| 73102 | 7.51  | 0.03 | 6.53  | 0.05 | 6.11  | 0.21 | 1.966 down  | 2.636 down  | 0.00 | 48.61   | GH39 $\beta$ -xylosidase                          |
| 73103 | 2.42  | 0.18 | 2.56  | 0.21 | 3.90  | 0.03 | 1.100 up    | 2.797 up    | 0.00 | 126.63  | ribosomal protein P2.                             |
| 73104 | 10.50 | 0.04 | 9.84  | 0.03 | 9.10  | 0.18 | 1.576 down  | 2.634 down  | 0.00 | 67.42   | Zn2Cys6 transcriptional regulator                 |
| 73119 | 2.75  | 0.11 | 2.92  | 0.24 | 4.63  | 0.10 | 1.119 up    | 3.672 up    | 0.00 | 172.00  | unknown protein                                   |
| 73173 | 7.12  | 0.07 | 7.70  | 0.24 | 8.87  | 0.55 | 1.500 up    | 3.381 up    | 0.02 | 12.09   | HFB1                                              |
| 73179 | 6.99  | 0.07 | 8.66  | 0.06 | 8.78  | 0.43 | 3.182 up    | 3.464 up    | 0.01 | 20.78   | GH71 $\alpha$ -1.3-glucanase                      |
| 73248 | 7.96  | 0.25 | 6.78  | 0.13 | 6.68  | 0.23 | 2.266 down  | 2.413 down  | 0.01 | 24.69   | GH55 exo-1.3- $\beta$ -glucanase                  |
| 73250 | 3.38  | 0.32 | 3.07  | 0.09 | 6.51  | 1.36 | 1.239 down  | 8.723 up    | 0.03 | 9.56    | Urea transporter                                  |
| 73344 | 3.24  | 0.00 | 3.42  | 0.12 | 5.06  | 0.19 | 1.136 up    | 3.532 up    | 0.00 | 116.51  | Cytochrome P450 CYP3/CYP5/CYP6/CYP9 subfamilies   |
| 73417 | 13.29 | 0.04 | 12.77 | 0.06 | 12.07 | 0.11 | 1.432 down  | 2.331 down  | 0.00 | 137.53  | bZIP transcriptional regulator MeaB               |
| 73516 | 14.59 | 0.04 | 13.92 | 0.08 | 13.56 | 0.34 | 1.590 down  | 2.049 down  | 0.03 | 10.24   | Grg1 Glucose repressible protein                  |
| 73536 | 9.46  | 0.12 | 9.48  | 0.15 | 12.80 | 0.11 | 1.012 up    | 10.116 up   | 0.00 | 782.96  | NADP-glutamate dehydrogenase                      |
| 73594 | 10.58 | 0.11 | 11.36 | 0.23 | 11.80 | 0.16 | 1.712 up    | 2.329 up    | 0.00 | 33.93   | unknown protein                                   |
| 73623 | 4.63  | 0.01 | 4.23  | 0.24 | 5.99  | 0.21 | 1.317 down  | 2.574 up    | 0.00 | 65.62   | flavoprotein monooxygenase                        |
| 73632 | 7.19  | 0.14 | 4.42  | 0.10 | 11.10 | 0.28 | 6.821 down  | 15.028 up   | 0.00 | 591.15  | CE5 acetyl xylan esterase AXE1                    |
| 73638 | 9.01  | 0.17 | 4.94  | 0.12 | 13.63 | 0.38 | 16.794 down | 24.546 up   | 0.00 | 555.34  | CIP1                                              |
| 73643 | 7.81  | 0.10 | 3.13  | 0.22 | 12.33 | 0.16 | 25.659 down | 22.910 up   | 0.00 | 2218.87 | GH61 polysaccharide monooxygenase CEL61a          |
| 73783 | 9.81  | 0.18 | 9.85  | 0.04 | 11.27 | 0.15 | 1.032 up    | 2.759 up    | 0.00 | 100.93  | mitochondrial co-chaperone GrpE . putative        |

|       |       |      |       |      |       |      |            |            |      |        |                                                                                      |
|-------|-------|------|-------|------|-------|------|------------|------------|------|--------|--------------------------------------------------------------------------------------|
| 73792 | 11.63 | 0.02 | 11.83 | 0.06 | 10.43 | 0.05 | 1.145 up   | 2.298 down | 0.00 | 809.35 | Zn2Cys6 transcriptional regulator                                                    |
| 73815 | 13.99 | 0.17 | 13.46 | 0.07 | 12.91 | 0.18 | 1.436 down | 2.114 down | 0.00 | 31.96  | unknown protein                                                                      |
| 73904 | 9.14  | 0.15 | 11.26 | 0.08 | 10.92 | 0.13 | 4.345 up   | 3.426 up   | 0.00 | 181.24 | unknown protein                                                                      |
| 73912 | 8.48  | 0.11 | 9.00  | 0.04 | 9.66  | 0.20 | 1.438 up   | 2.263 up   | 0.00 | 37.75  | unknown protein                                                                      |
| 73924 | 11.14 | 0.11 | 12.47 | 0.07 | 12.48 | 0.09 | 2.517 up   | 2.535 up   | 0.00 | 173.36 | MDR-type ABC transporters                                                            |
| 74017 | 11.41 | 0.02 | 11.14 | 0.08 | 10.11 | 0.09 | 1.207 down | 2.458 down | 0.00 | 235.41 | unknown protein                                                                      |
| 74054 | 12.28 | 0.03 | 12.31 | 0.04 | 13.38 | 0.13 | 1.020 up   | 2.139 up   | 0.00 | 111.43 | Exocyst component Sec6                                                               |
| 74060 | 7.87  | 1.07 | 8.74  | 0.11 | 11.21 | 0.26 | 1.822 up   | 10.096 up  | 0.00 | 32.26  | SSCRP                                                                                |
| 74162 | 12.52 | 0.00 | 12.17 | 0.06 | 11.39 | 0.12 | 1.277 down | 2.200 down | 0.00 | 107.12 | Helicase. C-terminal                                                                 |
| 74194 | 13.02 | 0.12 | 11.13 | 0.28 | 11.40 | 0.27 | 3.702 down | 3.064 down | 0.00 | 35.73  | mannitol dehydrogenase LXR1                                                          |
| 74214 | 9.95  | 0.20 | 8.46  | 0.00 | 8.51  | 0.27 | 2.813 down | 2.706 down | 0.00 | 30.94  | unknown protein                                                                      |
| 74215 | 6.96  | 0.15 | 7.80  | 0.03 | 5.73  | 0.29 | 1.792 up   | 2.347 down | 0.00 | 55.58  | RTA1-like protein. 7 TM. responds to xenobiotic stimuli                              |
| 74228 | 11.70 | 0.13 | 13.10 | 0.00 | 13.21 | 0.23 | 2.632 up   | 2.849 up   | 0.00 | 47.01  | oleate $\delta$ -12 desaturase                                                       |
| 74278 | 12.26 | 0.12 | 10.73 | 0.16 | 11.08 | 0.24 | 2.893 down | 2.268 down | 0.00 | 31.14  | Pyridine nucleotide-disulphide oxidoreductase. class-II                              |
| 74379 | 8.43  | 0.09 | 8.66  | 0.04 | 9.46  | 0.13 | 1.175 up   | 2.035 up   | 0.00 | 67.31  | ERG2 C-8 sterol isomerase; catalyzes the isomerization of the delta-8 double bond to |
| 74421 | 10.38 | 0.00 | 10.60 | 0.12 | 11.94 | 0.35 | 1.164 up   | 2.954 up   | 0.00 | 28.66  | unknown protein                                                                      |
| 74476 | 11.49 | 0.06 | 12.09 | 0.07 | 10.18 | 0.21 | 1.512 up   | 2.470 down | 0.00 | 97.69  | unknown protein                                                                      |
| 74486 | 10.91 | 0.02 | 11.51 | 0.02 | 12.03 | 0.13 | 1.513 up   | 2.165 up   | 0.00 | 82.02  | unknown protein                                                                      |
| 74502 | 13.25 | 0.12 | 12.63 | 0.04 | 12.24 | 0.04 | 1.539 down | 2.020 down | 0.00 | 172.70 | Aldehyde dehydrogenase                                                               |
| 74515 | 13.53 | 0.07 | 12.21 | 0.05 | 12.24 | 0.31 | 2.508 down | 2.449 down | 0.01 | 21.27  | unknown protein                                                                      |
| 74563 | 11.02 | 0.03 | 10.93 | 0.03 | 9.25  | 0.18 | 1.067 down | 3.411 down | 0.00 | 153.07 | unknown protein                                                                      |
| 74576 | 13.56 | 0.11 | 13.52 | 0.07 | 12.22 | 0.03 | 1.033 down | 2.544 down | 0.00 | 407.74 | BZIP transcriptional regulator                                                       |
| 74622 | 11.27 | 0.03 | 11.37 | 0.08 | 12.49 | 0.20 | 1.068 up   | 2.317 up   | 0.00 | 51.00  | unknown protein                                                                      |
| 74701 | 10.65 | 0.17 | 10.59 | 0.05 | 9.43  | 0.25 | 1.043 down | 2.336 down | 0.00 | 32.00  | GTP-binding protein involved in protein synthesis                                    |
| 74861 | 9.15  | 0.03 | 9.15  | 0.05 | 7.77  | 0.08 | 1.000 up   | 2.614 down | 0.00 | 457.84 | unknown protein                                                                      |
| 74943 | 9.15  | 0.05 | 9.97  | 0.04 | 10.62 | 0.14 | 1.760 up   | 2.763 up   | 0.00 | 110.40 | Diphthine synthase                                                                   |
| 74971 | 12.24 | 0.05 | 12.23 | 0.07 | 11.16 | 0.33 | 1.002 down | 2.104 down | 0.01 | 16.93  | unknown protein                                                                      |
| 75027 | 13.85 | 0.10 | 12.58 | 0.05 | 12.52 | 0.07 | 2.399 down | 2.514 down | 0.00 | 218.64 | unknown protein                                                                      |
| 75036 | 12.99 | 0.08 | 12.29 | 0.13 | 11.32 | 0.32 | 1.618 down | 3.168 down | 0.00 | 30.70  | GH63 $\alpha$ -glucosidase                                                           |
| 75156 | 4.13  | 0.04 | 3.53  | 0.17 | 5.94  | 0.19 | 1.519 down | 3.506 up   | 0.00 | 162.97 | unknown protein                                                                      |

|       |       |      |       |      |       |      |             |            |      |         |                                                                    |
|-------|-------|------|-------|------|-------|------|-------------|------------|------|---------|--------------------------------------------------------------------|
| 75247 | 4.67  | 0.02 | 4.44  | 0.26 | 6.06  | 0.17 | 1.176 down  | 2.611 up   | 0.00 | 73.54   | AAA+-type ATPase                                                   |
| 75260 | 11.33 | 0.02 | 10.36 | 0.05 | 10.03 | 0.09 | 1.954 down  | 2.455 down | 0.00 | 208.69  | RNA polymerase H/23 kD subunit                                     |
| 75271 | 9.55  | 0.06 | 9.16  | 0.19 | 11.33 | 0.33 | 1.311 down  | 3.421 up   | 0.00 | 54.50   | pyridoxine biosynthesis protein PDX1                               |
| 75290 | 7.46  | 0.04 | 9.70  | 0.05 | 6.17  | 0.18 | 4.744 up    | 2.431 down | 0.00 | 411.01  | dynamain GTPase                                                    |
| 75294 | 11.15 | 0.14 | 10.39 | 0.08 | 12.50 | 0.18 | 1.696 down  | 2.545 up   | 0.00 | 136.55  | BCAT_beta_family                                                   |
| 75295 | 13.34 | 0.06 | 12.39 | 0.02 | 11.98 | 0.16 | 1.935 down  | 2.580 down | 0.00 | 79.59   | Trehalose-6-phosphate synthase component TPS1 and related subunits |
| 75361 | 11.71 | 0.07 | 11.14 | 0.05 | 9.61  | 0.19 | 1.483 down  | 4.283 down | 0.00 | 149.15  | unknown protein                                                    |
| 75403 | 11.05 | 0.15 | 11.16 | 0.03 | 9.94  | 0.20 | 1.074 up    | 2.159 down | 0.00 | 46.21   | CsdB Selenocysteine lyase                                          |
| 75409 | 11.49 | 0.00 | 10.63 | 0.13 | 10.44 | 0.08 | 1.811 down  | 2.064 down | 0.00 | 107.30  | Phospholipid-translocating P-type ATPase. flippase; putative       |
| 75470 | 7.00  | 0.15 | 7.68  | 0.19 | 8.19  | 0.22 | 1.594 up    | 2.271 up   | 0.01 | 23.83   | unknown protein                                                    |
| 75609 | 13.14 | 0.03 | 13.37 | 0.10 | 14.26 | 0.12 | 1.178 up    | 2.180 up   | 0.00 | 89.17   | Rpl18 gene encoding 60sRibosomal protein L18.                      |
| 75704 | 9.58  | 0.10 | 10.48 | 0.16 | 10.64 | 0.09 | 1.867 up    | 2.085 up   | 0.00 | 62.22   | Adenosine 5'-phosphosulfate kinase                                 |
| 75713 | 11.87 | 0.17 | 9.07  | 0.00 | 10.78 | 0.36 | 6.996 down  | 2.139 down | 0.00 | 48.30   | Cytochrome P450 CYP2 subfamily                                     |
| 75758 | 12.19 | 0.08 | 12.44 | 0.08 | 11.18 | 0.34 | 1.187 up    | 2.014 down | 0.01 | 18.55   | unknown protein                                                    |
| 75884 | 10.22 | 0.12 | 8.43  | 0.12 | 7.36  | 0.79 | 3.472 down  | 7.271 down | 0.02 | 14.53   | unknown protein                                                    |
| 75923 | 11.65 | 0.32 | 10.59 | 0.18 | 10.03 | 0.31 | 2.091 down  | 3.079 down | 0.01 | 20.54   | unknown protein                                                    |
| 75985 | 11.16 | 0.10 | 12.43 | 0.16 | 13.10 | 0.24 | 2.407 up    | 3.846 up   | 0.00 | 61.91   | Isochorismatase hydrolase                                          |
| 75995 | 12.90 | 0.26 | 13.24 | 0.29 | 14.04 | 0.26 | 1.266 up    | 2.204 up   | 0.02 | 14.42   | ssDNA binding protein                                              |
| 76034 | 12.11 | 0.25 | 10.62 | 0.02 | 10.77 | 0.24 | 2.795 down  | 2.527 down | 0.00 | 31.28   | Iron/ascorbate family oxidoreductases                              |
| 76073 | 12.03 | 0.27 | 12.70 | 0.03 | 13.46 | 0.32 | 1.587 up    | 2.692 up   | 0.01 | 18.96   | U6 snRNA-associated Sm-like protein LSM6                           |
| 76075 | 11.73 | 0.01 | 13.52 | 0.05 | 13.25 | 0.27 | 3.472 up    | 2.873 up   | 0.00 | 44.32   | unknown protein                                                    |
| 76136 | 12.16 | 0.21 | 12.02 | 0.18 | 9.83  | 0.28 | 1.097 down  | 4.994 down | 0.00 | 82.07   | unknown protein                                                    |
| 76151 | 10.40 | 0.04 | 10.84 | 0.04 | 11.72 | 0.13 | 1.358 up    | 2.492 up   | 0.00 | 125.32  | GT31 $\beta$ -glycosyltransferase                                  |
| 76200 | 11.85 | 0.07 | 12.04 | 0.06 | 13.12 | 0.27 | 1.138 up    | 2.411 up   | 0.00 | 30.42   | unknown protein                                                    |
| 76210 | 7.02  | 0.19 | 3.12  | 0.05 | 10.47 | 1.49 | 14.836 down | 10.988 up  | 0.01 | 27.48   | GH62 $\alpha$ -L-arabinofuranosidase ABF2                          |
| 76220 | 13.13 | 0.01 | 12.86 | 0.21 | 12.11 | 0.14 | 1.205 down  | 2.030 down | 0.00 | 38.42   | Zn2Cys6 transcriptional regulator                                  |
| 76238 | 13.36 | 0.08 | 8.09  | 0.13 | 10.90 | 0.09 | 38.819 down | 5.536 down | 0.00 | 1524.02 | plasma membrane H <sup>+</sup> ATPase                              |
| 76288 | 10.81 | 0.14 | 9.95  | 0.06 | 9.42  | 0.22 | 1.806 down  | 2.610 down | 0.00 | 39.21   | short chain dehydrogenase/reductase                                |
| 76360 | 3.67  | 0.06 | 3.52  | 0.10 | 6.00  | 0.29 | 1.105 down  | 5.019 up   | 0.00 | 106.54  | unknown protein. 1 TM domain                                       |
| 76366 | 12.29 | 0.10 | 7.39  | 0.04 | 10.51 | 0.16 | 29.853 down | 3.451 down | 0.00 | 699.15  | NADH:flavin oxidoreductase/12-oxophytodienoate reductase           |

|       |       |      |       |      |       |      |              |            |      |        |                                                          |
|-------|-------|------|-------|------|-------|------|--------------|------------|------|--------|----------------------------------------------------------|
| 76421 | 11.00 | 0.06 | 10.53 | 0.10 | 9.77  | 0.31 | 1.382 down   | 2.333 down | 0.01 | 18.06  | aromatic ring-opening dioxygenase LigB subunit. putative |
| 76453 | 12.40 | 0.13 | 12.63 | 0.09 | 13.52 | 0.34 | 1.175 up     | 2.179 up   | 0.02 | 13.71  | MDR-type ABC transporters                                |
| 76532 | 6.76  | 0.08 | 7.38  | 0.20 | 9.34  | 0.23 | 1.535 up     | 6.009 up   | 0.00 | 130.32 | ribosomal protein (60S) P0                               |
| 76543 | 11.28 | 0.10 | 11.20 | 0.05 | 10.27 | 0.08 | 1.052 down   | 2.013 down | 0.00 | 150.60 | ARF GTPase activator (Csx2). putative                    |
| 76601 | 12.12 | 0.02 | 5.48  | 0.03 | 10.45 | 0.24 | 100.220 down | 3.183 down | 0.00 | 722.95 | Sulfite oxidase. molybdopterin-binding component         |
| 76620 | 10.63 | 0.23 | 9.60  | 0.25 | 9.27  | 0.31 | 2.041 down   | 2.566 down | 0.01 | 15.31  | Glycerol-3-phosphate dehydrogenase                       |
| 76633 | 11.50 | 0.02 | 11.62 | 0.15 | 9.29  | 0.49 | 1.083 up     | 4.622 down | 0.00 | 35.25  | MDR multidrug transporter                                |
| 76659 | 7.35  | 0.19 | 7.65  | 0.25 | 9.85  | 0.23 | 1.222 up     | 5.631 up   | 0.00 | 108.65 | unknown protein                                          |
| 76672 | 7.05  | 0.16 | 6.68  | 0.05 | 11.84 | 1.69 | 1.287 down   | 27.778 up  | 0.02 | 14.51  | GH3 $\beta$ -glucosidase BGL1/CEL3a                      |
| 76677 | 11.37 | 0.10 | 11.19 | 0.12 | 10.05 | 0.21 | 1.132 down   | 2.490 down | 0.00 | 49.36  | Zn2Cys6 transcriptional regulator                        |
| 76682 | 3.70  | 0.03 | 4.03  | 0.15 | 5.98  | 0.72 | 1.259 up     | 4.843 up   | 0.02 | 14.21  | PDR-type ABC transporters                                |
| 76705 | 11.75 | 0.11 | 11.87 | 0.00 | 10.54 | 0.18 | 1.082 up     | 2.325 down | 0.00 | 74.16  | Zn2Cys6 transcriptional regulator                        |
| 76713 | 12.89 | 0.10 | 12.25 | 0.25 | 11.20 | 0.15 | 1.567 down   | 3.232 down | 0.00 | 76.30  | unknown protein                                          |
| 76740 | 10.18 | 0.00 | 10.76 | 0.29 | 11.91 | 0.20 | 1.492 up     | 3.307 up   | 0.00 | 53.58  | zuotin                                                   |
| 76766 | 12.59 | 0.03 | 11.97 | 0.02 | 11.43 | 0.21 | 1.542 down   | 2.240 down | 0.00 | 35.28  | xanthine/uracil permease                                 |
| 76822 | 9.21  | 0.06 | 11.86 | 0.09 | 8.00  | 0.29 | 6.287 up     | 2.302 down | 0.00 | 193.82 | unknown protein                                          |
| 76828 | 10.58 | 0.04 | 11.00 | 0.09 | 11.61 | 0.21 | 1.334 up     | 2.039 up   | 0.01 | 26.04  | exosome complex exonuclease RRP40. putative              |
| 76897 | 14.55 | 0.13 | 14.11 | 0.12 | 13.07 | 0.41 | 1.363 down   | 2.796 down | 0.01 | 15.68  | MFS permease                                             |
| 76910 | 10.70 | 0.06 | 9.47  | 0.15 | 9.58  | 0.09 | 2.344 down   | 2.174 down | 0.00 | 95.87  | monocarboxylate transporter                              |
| 76986 | 11.77 | 0.05 | 11.61 | 0.08 | 10.30 | 0.26 | 1.119 down   | 2.765 down | 0.00 | 44.96  | unknown protein                                          |
| 77138 | 12.04 | 0.12 | 12.25 | 0.16 | 13.30 | 0.31 | 1.151 up     | 2.395 up   | 0.01 | 20.72  | unknown protein                                          |
| 77167 | 9.37  | 0.07 | 9.36  | 0.23 | 7.57  | 0.27 | 1.011 down   | 3.488 down | 0.00 | 57.95  | unknown protein                                          |
| 77202 | 11.22 | 0.03 | 8.48  | 0.12 | 9.03  | 0.11 | 6.662 down   | 4.546 down | 0.00 | 421.43 | short chain dehydrogenase/reductase                      |
| 77291 | 9.94  | 0.28 | 10.38 | 0.03 | 8.60  | 0.38 | 1.359 up     | 2.532 down | 0.01 | 24.44  | Zn2Cys6 transcriptional regulator                        |
| 77299 | 8.93  | 0.20 | 7.05  | 0.04 | 10.11 | 0.51 | 3.682 down   | 2.262 up   | 0.00 | 38.59  | GH2 Exo- $\beta$ -D-glucosaminidase GLS93                |
| 77423 | 12.08 | 0.06 | 10.50 | 0.05 | 9.70  | 0.54 | 2.978 down   | 5.195 down | 0.01 | 21.60  | Jacalin-like lectin                                      |
| 77495 | 12.71 | 0.15 | 12.95 | 0.25 | 13.83 | 0.12 | 1.182 up     | 2.172 up   | 0.00 | 40.03  | eukaryotic translation initiation factor 3 subunit 11.   |
| 77506 | 13.60 | 0.03 | 13.37 | 0.03 | 12.54 | 0.15 | 1.173 down   | 2.078 down | 0.00 | 66.93  | GH5 $\beta$ -glycosidase CEL5d                           |
| 77517 | 10.15 | 0.08 | 10.32 | 0.01 | 11.92 | 0.15 | 1.129 up     | 3.423 up   | 0.00 | 195.91 | MFS hexose transporter                                   |
| 77547 | 10.34 | 0.02 | 8.96  | 0.06 | 7.65  | 0.26 | 2.598 down   | 6.449 down | 0.00 | 120.91 | GT1 glycosyltransferase                                  |

|       |       |      |       |      |       |      |             |            |      |        |                                                                                        |
|-------|-------|------|-------|------|-------|------|-------------|------------|------|--------|----------------------------------------------------------------------------------------|
| 77557 | 11.27 | 0.06 | 8.40  | 0.01 | 8.77  | 0.24 | 7.316 down  | 5.660 down | 0.00 | 154.68 | GT glycosyltransferases not yet assigned to a family. 3 TMs                            |
| 77593 | 7.95  | 0.06 | 7.62  | 0.14 | 6.24  | 0.37 | 1.259 down  | 3.284 down | 0.00 | 28.93  | unknown protein                                                                        |
| 77602 | 14.05 | 0.04 | 13.46 | 0.11 | 12.91 | 0.29 | 1.503 down  | 2.212 down | 0.01 | 16.99  | A.a-trehalose-phosphate synthase                                                       |
| 77629 | 8.57  | 0.03 | 9.46  | 0.11 | 10.04 | 0.47 | 1.847 up    | 2.756 up   | 0.03 | 10.66  | unknown protein                                                                        |
| 77743 | 9.97  | 0.12 | 10.86 | 0.02 | 8.37  | 0.24 | 1.852 up    | 3.027 down | 0.00 | 124.03 | unknown protein                                                                        |
| 77878 | 11.32 | 0.04 | 11.19 | 0.00 | 13.11 | 0.14 | 1.096 down  | 3.446 up   | 0.00 | 284.36 | C2H2 transcriptional regulator                                                         |
| 77915 | 10.12 | 0.11 | 10.21 | 0.12 | 11.14 | 0.24 | 1.061 up    | 2.019 up   | 0.01 | 23.05  | unknown protein                                                                        |
| 77932 | 10.51 | 0.12 | 11.04 | 0.18 | 12.22 | 0.36 | 1.446 up    | 3.282 up   | 0.01 | 25.78  | Ribosomal protein L30.                                                                 |
| 77979 | 10.63 | 0.02 | 11.24 | 0.30 | 11.90 | 0.13 | 1.525 up    | 2.412 up   | 0.00 | 38.70  | SmallSubunit. aps3. of the adaptor protein complex AP-3 of clathrin-coated vesicles; i |
| 78010 | 12.14 | 0.00 | 12.01 | 0.02 | 10.86 | 0.17 | 1.096 down  | 2.423 down | 0.00 | 89.58  | ankyrin containing protein                                                             |
| 78012 | 10.93 | 0.01 | 10.48 | 0.10 | 9.85  | 0.30 | 1.359 down  | 2.109 down | 0.01 | 14.73  | Sensory transduction histidine kinase                                                  |
| 78037 | 11.34 | 0.01 | 11.05 | 0.03 | 9.73  | 0.25 | 1.220 down  | 3.040 down | 0.00 | 59.78  | unknown protein                                                                        |
| 78042 | 11.55 | 0.00 | 11.42 | 0.05 | 10.35 | 0.22 | 1.091 down  | 2.296 down | 0.00 | 44.22  | unknown protein                                                                        |
| 78264 | 10.33 | 0.09 | 11.02 | 0.04 | 11.48 | 0.17 | 1.611 up    | 2.211 up   | 0.00 | 45.79  | Peptide methionine sulfoxide reductase                                                 |
| 78274 | 8.07  | 0.12 | 7.77  | 0.33 | 9.13  | 0.23 | 1.231 down  | 2.084 up   | 0.01 | 27.07  | phosphatidylinositol-3-phosphate 5-kinase; fab1                                        |
| 78301 | 12.93 | 0.03 | 12.63 | 0.25 | 11.75 | 0.14 | 1.228 down  | 2.251 down | 0.00 | 45.19  | cation diffusion facilitator family transporter                                        |
| 78357 | 13.88 | 0.26 | 13.71 | 0.25 | 12.39 | 0.14 | 1.122 down  | 2.796 down | 0.00 | 50.77  | NADH-quinone oxidoreductase. putative                                                  |
| 78391 | 9.55  | 0.04 | 9.00  | 0.00 | 7.39  | 0.21 | 1.462 down  | 4.460 down | 0.00 | 131.62 | unknown protein                                                                        |
| 78465 | 11.54 | 0.01 | 11.95 | 0.04 | 13.06 | 0.17 | 1.324 up    | 2.856 up   | 0.00 | 106.76 | siderophore transporter                                                                |
| 78552 | 11.30 | 0.03 | 11.19 | 0.00 | 9.97  | 0.14 | 1.082 down  | 2.510 down | 0.00 | 135.60 | Aromatic L-amino acid decarboxylase                                                    |
| 78585 | 11.05 | 0.09 | 5.74  | 0.16 | 8.79  | 0.93 | 39.746 down | 4.811 down | 0.01 | 27.21  | MFS permease                                                                           |
| 78611 | 13.06 | 0.03 | 12.16 | 0.07 | 11.02 | 0.26 | 1.873 down  | 4.125 down | 0.00 | 70.52  | phospholipase D                                                                        |
| 78639 | 11.45 | 0.01 | 13.71 | 0.19 | 12.98 | 0.13 | 4.778 up    | 2.880 up   | 0.00 | 150.16 | Serine/threonine protein kinase                                                        |
| 78679 | 9.74  | 0.03 | 10.17 | 0.21 | 10.78 | 0.15 | 1.345 up    | 2.057 up   | 0.00 | 33.79  | mitochondrial carrier protein                                                          |
| 78688 | 14.18 | 0.04 | 13.41 | 0.11 | 12.72 | 0.06 | 1.703 down  | 2.746 down | 0.00 | 292.77 | Winged helix repressor DNA-binding                                                     |
| 78713 | 11.27 | 0.08 | 9.68  | 0.08 | 9.19  | 0.25 | 3.003 down  | 4.203 down | 0.00 | 72.48  | GH72 $\beta$ -(1-3) glucanosyltransferase                                              |
| 78740 | 9.06  | 0.04 | 9.11  | 0.07 | 10.22 | 0.29 | 1.037 up    | 2.234 up   | 0.01 | 24.94  | v-SNARE Bet1. ER-Golgi complex                                                         |
| 78773 | 13.46 | 0.02 | 13.36 | 0.04 | 12.41 | 0.15 | 1.069 down  | 2.061 down | 0.00 | 69.67  | long-chain-fatty-acid--CoA ligase 2                                                    |
| 78792 | 10.79 | 0.02 | 9.88  | 0.01 | 8.75  | 0.25 | 1.875 down  | 4.111 down | 0.00 | 81.04  | unknown protein                                                                        |
| 78797 | 12.89 | 0.02 | 12.77 | 0.08 | 11.08 | 0.13 | 1.085 down  | 3.513 down | 0.00 | 257.08 | xanthine dehydrogenase                                                                 |

|       |       |      |       |      |       |      |             |            |      |         |                                                                                      |
|-------|-------|------|-------|------|-------|------|-------------|------------|------|---------|--------------------------------------------------------------------------------------|
| 78799 | 11.05 | 0.01 | 10.95 | 0.04 | 9.27  | 0.29 | 1.076 down  | 3.434 down | 0.00 | 60.14   | Zn2Cys6 transcriptional regulator                                                    |
| 78811 | 12.36 | 0.16 | 12.09 | 0.11 | 11.25 | 0.45 | 1.201 down  | 2.151 down | 0.04 | 7.62    | unknown protein                                                                      |
| 78828 | 12.00 | 0.13 | 13.51 | 0.12 | 13.57 | 0.47 | 2.840 up    | 2.953 up   | 0.02 | 13.12   | carboxylesterase type B                                                              |
| 78864 | 9.20  | 0.05 | 9.45  | 0.09 | 10.63 | 0.26 | 1.190 up    | 2.701 up   | 0.00 | 41.71   | GcvT Glycine cleavage system T protein                                               |
| 78866 | 12.97 | 0.13 | 12.98 | 0.00 | 11.93 | 0.26 | 1.009 up    | 2.054 down | 0.01 | 24.88   | unknown protein                                                                      |
| 78895 | 11.44 | 0.01 | 11.45 | 0.14 | 9.99  | 0.21 | 1.006 up    | 2.724 down | 0.00 | 68.48   | Zn2Cys6 transcriptional regulator                                                    |
| 78970 | 14.36 | 0.04 | 13.06 | 0.05 | 12.08 | 0.07 | 2.472 down  | 4.870 down | 0.00 | 1013.94 | mitochondrial (phosphate) carrier                                                    |
| 78984 | 12.56 | 0.03 | 12.18 | 0.05 | 11.49 | 0.27 | 1.304 down  | 2.108 down | 0.01 | 18.87   | unknown protein                                                                      |
| 79034 | 10.12 | 0.05 | 10.67 | 0.00 | 11.60 | 0.04 | 1.463 up    | 2.784 up   | 0.00 | 1196.97 | ABC1 family protein                                                                  |
| 79059 | 12.11 | 0.05 | 12.19 | 0.02 | 13.17 | 0.20 | 1.057 up    | 2.079 up   | 0.00 | 40.97   | Myo-inositol-1-phosphate synthase. associated to cellulase signal transduction (PMID |
| 79106 | 14.27 | 0.15 | 14.68 | 0.03 | 15.32 | 0.04 | 1.328 up    | 2.075 up   | 0.00 | 148.32  | 40s ribosomal protein L44e by homology to the corresponding protein of several yeas  |
| 79153 | 12.21 | 0.11 | 11.99 | 0.14 | 10.67 | 0.38 | 1.159 down  | 2.901 down | 0.01 | 22.27   | HyuA. N-methylhydantoinase A/acetone carboxylase. beta subunit                       |
| 79187 | 10.09 | 0.01 | 11.14 | 0.19 | 11.33 | 0.06 | 2.070 up    | 2.371 up   | 0.00 | 111.19  | DNA polymerase alpha-primase complex. polymerase-associated subunit B                |
| 79202 | 11.83 | 0.04 | 10.58 | 0.09 | 13.63 | 0.12 | 2.388 down  | 3.461 up   | 0.00 | 633.86  | MFS permease. associated with cellulose signalling                                   |
| 79222 | 10.00 | 0.06 | 6.26  | 0.02 | 7.77  | 0.35 | 13.373 down | 4.677 down | 0.00 | 93.61   | unknown protein                                                                      |
| 79229 | 11.34 | 0.04 | 11.92 | 0.19 | 12.67 | 0.14 | 1.497 up    | 2.508 up   | 0.00 | 65.15   | elongation factor G (Tu) and the LepA membrane protein family.                       |
| 79237 | 11.22 | 0.15 | 10.73 | 0.09 | 9.59  | 0.12 | 1.407 down  | 3.081 down | 0.00 | 139.02  | unknown protein                                                                      |
| 79271 | 13.81 | 0.14 | 13.59 | 0.08 | 12.21 | 0.16 | 1.162 down  | 3.028 down | 0.00 | 110.77  | malate synthase                                                                      |
| 79345 | 8.07  | 0.06 | 9.79  | 0.21 | 9.90  | 0.50 | 3.286 up    | 3.544 up   | 0.01 | 15.00   | unknown protein. Mpv17/PMP22 family                                                  |
| 79361 | 10.00 | 0.14 | 11.17 | 0.06 | 11.26 | 0.10 | 2.257 up    | 2.408 up   | 0.00 | 112.48  | unknown protein                                                                      |
| 79396 | 14.17 | 0.05 | 12.88 | 0.06 | 13.11 | 0.27 | 2.453 down  | 2.093 down | 0.01 | 22.97   | GT2 $\beta$ -glycosyltransferase. related to hyaluronan synthases                    |
| 79426 | 8.95  | 0.05 | 9.45  | 0.06 | 10.04 | 0.31 | 1.416 up    | 2.139 up   | 0.02 | 14.49   | unknown protein                                                                      |
| 79461 | 12.65 | 0.23 | 11.97 | 0.02 | 11.59 | 0.15 | 1.603 down  | 2.087 down | 0.00 | 30.74   | unknown protein                                                                      |
| 79487 | 10.89 | 0.02 | 11.22 | 0.02 | 12.14 | 0.31 | 1.260 up    | 2.392 up   | 0.01 | 21.82   | Mannose-P-dolichol utilization defect 1 protein                                      |
| 79565 | 9.72  | 0.15 | 10.62 | 0.08 | 10.92 | 0.28 | 1.870 up    | 2.302 up   | 0.01 | 18.15   | Thioredoxin reductase TrxB                                                           |
| 79602 | 10.06 | 0.08 | 10.07 | 0.07 | 7.88  | 0.44 | 1.010 up    | 4.513 down | 0.00 | 40.67   | GH81 endo-1,3- $\beta$ -glucanase                                                    |
| 79606 | 13.12 | 0.07 | 12.41 | 0.04 | 12.00 | 0.15 | 1.639 down  | 2.177 down | 0.00 | 58.33   | GH115 xylan- $\alpha$ -1,2-glucuronidase or $\alpha$ -(4-O-methyl)-glucuronidase     |
| 79644 | 9.95  | 0.11 | 9.44  | 0.08 | 11.12 | 0.37 | 1.424 down  | 2.247 up   | 0.01 | 24.81   | metal ion transporter SMF2                                                           |
| 79661 | 11.84 | 0.21 | 11.87 | 0.05 | 10.63 | 0.25 | 1.018 up    | 2.319 down | 0.00 | 33.14   | unknown protein                                                                      |
| 79725 | 10.00 | 0.03 | 9.87  | 0.19 | 8.37  | 0.10 | 1.094 down  | 3.115 down | 0.00 | 179.55  | Zn2Cys6 transcriptional regulator                                                    |

|       |       |      |       |      |       |      |             |            |      |        |                                                                                   |
|-------|-------|------|-------|------|-------|------|-------------|------------|------|--------|-----------------------------------------------------------------------------------|
| 79726 | 9.56  | 0.02 | 12.54 | 0.06 | 12.74 | 0.39 | 7.847 up    | 9.055 up   | 0.00 | 80.68  | unknown protein                                                                   |
| 79741 | 9.16  | 0.12 | 8.30  | 0.09 | 10.30 | 0.36 | 1.807 down  | 2.212 up   | 0.00 | 34.55  | ER-bound Farnesyl-diphosphate farnesyltransferase                                 |
| 79756 | 10.21 | 0.01 | 10.43 | 0.03 | 8.93  | 0.19 | 1.166 up    | 2.416 down | 0.00 | 84.60  | F-Box/WD40 repeat protein FWD-1. targets the clock component FRQ for degradation  |
| 79779 | 8.12  | 0.01 | 8.82  | 0.08 | 10.56 | 0.62 | 1.626 up    | 5.436 up   | 0.01 | 20.20  | unknown protein                                                                   |
| 79807 | 12.64 | 0.03 | 12.51 | 0.12 | 11.58 | 0.38 | 1.096 down  | 2.083 down | 0.02 | 10.82  | Aspartic-type endopeptidase ctsD                                                  |
| 79816 | 5.84  | 0.06 | 5.57  | 0.28 | 7.72  | 0.46 | 1.212 down  | 3.680 up   | 0.01 | 28.23  | unknown protein; secreted                                                         |
| 79823 | 10.21 | 0.28 | 9.81  | 0.01 | 9.14  | 0.21 | 1.320 down  | 2.100 down | 0.01 | 19.97  | DCL2. Dicer-like protein. involved in quelling                                    |
| 79933 | 8.82  | 0.31 | 9.16  | 0.10 | 10.47 | 0.34 | 1.273 up    | 3.151 up   | 0.01 | 24.57  | mitochondrial ribosomal protein MRPL6.                                            |
| 79947 | 11.67 | 0.13 | 11.34 | 0.00 | 13.01 | 0.14 | 1.257 down  | 2.543 up   | 0.00 | 160.60 | DNA-dependent RNA polymerase                                                      |
| 79960 | 10.75 | 0.20 | 12.41 | 0.09 | 12.28 | 0.12 | 3.156 up    | 2.894 up   | 0.00 | 107.20 | GH47 $\alpha$ -1.2-mannosidase                                                    |
| 80019 | 13.35 | 0.14 | 14.15 | 0.01 | 14.60 | 0.23 | 1.739 up    | 2.366 up   | 0.00 | 28.81  | short-chain dehydrogenase/reductase                                               |
| 80026 | 12.50 | 0.20 | 13.64 | 0.02 | 14.16 | 0.39 | 2.194 up    | 3.143 up   | 0.01 | 17.98  | MFS permease                                                                      |
| 80034 | 12.23 | 0.07 | 12.52 | 0.07 | 11.17 | 0.16 | 1.226 up    | 2.088 down | 0.00 | 85.54  | DadA Glycine/D-amino acid oxidases (deaminating) [Amino acid transport and metabo |
| 80056 | 6.62  | 0.14 | 7.67  | 0.20 | 8.38  | 0.53 | 2.072 up    | 3.390 up   | 0.02 | 11.44  | RNA 3'-terminal phosphate cyclase . putative                                      |
| 80058 | 11.32 | 0.03 | 7.80  | 0.23 | 9.23  | 0.38 | 11.514 down | 4.257 down | 0.00 | 64.66  | MFS permease                                                                      |
| 80096 | 12.88 | 0.04 | 12.76 | 0.05 | 11.57 | 0.43 | 1.083 down  | 2.464 down | 0.02 | 13.76  | unknown protein                                                                   |
| 80105 | 11.80 | 0.04 | 11.81 | 0.10 | 10.68 | 0.23 | 1.011 up    | 2.166 down | 0.00 | 35.59  | unknown protein                                                                   |
| 80137 | 11.09 | 0.10 | 10.84 | 0.12 | 9.92  | 0.22 | 1.188 down  | 2.247 down | 0.00 | 34.51  | unknown protein                                                                   |
| 80167 | 12.99 | 0.06 | 13.43 | 0.14 | 14.07 | 0.21 | 1.362 up    | 2.118 up   | 0.01 | 27.28  | histone H4 variant                                                                |
| 80211 | 6.02  | 0.05 | 6.56  | 0.01 | 8.77  | 0.31 | 1.450 up    | 6.721 up   | 0.00 | 106.49 | ribosomal protein L14.                                                            |
| 80288 | 11.80 | 0.06 | 12.06 | 0.05 | 13.24 | 0.33 | 1.203 up    | 2.718 up   | 0.01 | 26.07  | cytochrome c oxidase polypeptide V                                                |
| 80291 | 12.38 | 0.04 | 12.23 | 0.02 | 11.02 | 0.30 | 1.110 down  | 2.580 down | 0.00 | 30.64  | Zn2Cys6 transcriptional regulator                                                 |
| 80340 | 9.94  | 0.11 | 12.27 | 0.04 | 12.59 | 0.16 | 5.037 up    | 6.295 up   | 0.00 | 284.96 | GT $\alpha$ -1.6-mannosyltransferase                                              |
| 80365 | 11.98 | 0.02 | 12.13 | 0.15 | 10.84 | 0.19 | 1.112 up    | 2.200 down | 0.00 | 56.01  | unknown protein                                                                   |
| 80425 | 10.33 | 0.05 | 9.88  | 0.04 | 9.18  | 0.21 | 1.363 down  | 2.221 down | 0.00 | 35.11  | unknown protein                                                                   |
| 80441 | 11.62 | 0.05 | 12.17 | 0.21 | 12.83 | 0.35 | 1.469 up    | 2.322 up   | 0.02 | 12.53  | unknown protein                                                                   |
| 80523 | 10.05 | 0.07 | 9.78  | 0.09 | 8.67  | 0.18 | 1.208 down  | 2.604 down | 0.00 | 71.69  | pH-response regulator protein palC                                                |
| 80528 | 10.64 | 0.32 | 12.63 | 0.02 | 11.71 | 0.08 | 3.962 up    | 2.091 up   | 0.00 | 80.10  | G $\beta$ -WD40 protein                                                           |
| 80553 | 12.91 | 0.04 | 12.80 | 0.11 | 11.73 | 0.12 | 1.083 down  | 2.260 down | 0.00 | 112.98 | ADP-ribosylation factor like protein                                              |
| 80636 | 12.70 | 0.02 | 12.40 | 0.06 | 11.57 | 0.27 | 1.232 down  | 2.196 down | 0.01 | 22.41  | unknown protein                                                                   |



|       |       |      |       |      |       |      |             |            |      |         |                                                  |
|-------|-------|------|-------|------|-------|------|-------------|------------|------|---------|--------------------------------------------------|
| 80639 | 3.54  | 0.13 | 4.93  | 0.30 | 5.56  | 0.47 | 2.616 up    | 4.050 up   | 0.01 | 17.71   | iron transporter                                 |
| 80645 | 12.86 | 0.02 | 12.85 | 0.05 | 11.01 | 0.48 | 1.004 down  | 3.596 down | 0.01 | 24.23   | Amidase                                          |
| 80654 | 9.34  | 0.00 | 5.79  | 0.09 | 7.39  | 0.12 | 11.701 down | 3.854 down | 0.00 | 616.24  | UDP-glucuronosyl and UDP-glucosyl transferase    |
| 80659 | 11.38 | 0.03 | 4.77  | 0.32 | 8.84  | 0.29 | 97.770 down | 5.813 down | 0.00 | 310.61  | alcohol oxidase AOX1                             |
| 80668 | 11.31 | 0.12 | 10.49 | 0.06 | 9.62  | 0.19 | 1.769 down  | 3.231 down | 0.00 | 78.97   | Zn2Cys6 transcriptional regulator                |
| 80685 | 10.18 | 0.01 | 10.58 | 0.01 | 8.09  | 0.35 | 1.314 up    | 4.278 down | 0.00 | 74.07   | unknown protein                                  |
| 80695 | 11.82 | 0.22 | 11.98 | 0.22 | 10.79 | 0.26 | 1.119 up    | 2.036 down | 0.01 | 20.29   | half-sized ABC transporter                       |
| 80714 | 12.33 | 0.16 | 12.56 | 0.15 | 10.94 | 0.35 | 1.174 up    | 2.611 down | 0.01 | 27.37   | Dolichyl-phosphate-mannose a-mannosyltransferase |
| 80733 | 6.63  | 0.00 | 7.20  | 0.17 | 7.86  | 0.09 | 1.493 up    | 2.345 up   | 0.00 | 99.06   | unknown protein                                  |
| 80758 | 12.83 | 0.08 | 12.70 | 0.09 | 11.81 | 0.04 | 1.095 down  | 2.026 down | 0.00 | 235.48  | serine/threonine protein kinase nrc2             |
| 80843 | 2.56  | 0.10 | 2.50  | 0.11 | 4.05  | 0.16 | 1.043 down  | 2.809 up   | 0.00 | 113.23  | 26S proteasome regulatory complex subunit Rpn8   |
| 80871 | 11.71 | 0.15 | 10.92 | 0.10 | 9.91  | 0.41 | 1.732 down  | 3.483 down | 0.01 | 20.85   | unknown protein                                  |
| 80875 | 10.50 | 0.01 | 11.05 | 0.11 | 8.39  | 0.79 | 1.465 up    | 4.312 down | 0.01 | 15.59   | MFS permease                                     |
| 80980 | 11.74 | 0.07 | 14.20 | 0.08 | 14.00 | 0.15 | 5.500 up    | 4.778 up   | 0.00 | 253.40  | peptidyl arginine deiminase                      |
| 81004 | 8.68  | 0.02 | 8.23  | 0.09 | 7.54  | 0.14 | 1.369 down  | 2.202 down | 0.00 | 65.45   | aspartyl protease                                |
| 81019 | 11.00 | 0.24 | 10.28 | 0.08 | 8.49  | 0.55 | 1.642 down  | 5.665 down | 0.01 | 25.18   | Zinc-containing alcohol dehydrogenase            |
| 81022 | 13.01 | 0.06 | 13.08 | 0.10 | 11.24 | 0.18 | 1.047 up    | 3.411 down | 0.00 | 151.70  | allantoate permease. 10 TM domains               |
| 81058 | 9.14  | 0.15 | 8.02  | 0.05 | 7.32  | 0.25 | 2.175 down  | 3.544 down | 0.00 | 53.14   | peptidase family S58                             |
| 81082 | 7.86  | 0.09 | 11.34 | 0.10 | 12.52 | 1.11 | 11.207 up   | 25.313 up  | 0.01 | 19.53   | aquaglyceroporin                                 |
| 81087 | 10.24 | 0.09 | 6.86  | 0.06 | 11.84 | 0.55 | 10.395 down | 3.035 up   | 0.00 | 88.30   | aminopeptidase Y                                 |
| 81096 | 10.40 | 0.14 | 10.44 | 0.08 | 14.28 | 0.11 | 1.024 up    | 14.686 up  | 0.00 | 1233.48 | ferric reductase                                 |
| 81125 | 13.56 | 0.02 | 12.48 | 0.05 | 12.24 | 0.24 | 2.107 down  | 2.495 down | 0.00 | 33.31   | Amino acid permease                              |
| 81150 | 9.24  | 0.09 | 9.84  | 0.16 | 8.06  | 0.24 | 1.513 up    | 2.272 down | 0.00 | 56.07   | unknown protein                                  |
| 81183 | 11.63 | 0.10 | 11.44 | 0.10 | 10.38 | 0.20 | 1.134 down  | 2.366 down | 0.00 | 48.16   | unknown protein                                  |
| 81271 | 10.46 | 0.09 | 11.72 | 0.04 | 12.10 | 0.43 | 2.399 up    | 3.113 up   | 0.01 | 15.84   | xylitol dehydrogenase XDH1                       |
| 81275 | 12.46 | 0.14 | 11.22 | 0.12 | 10.76 | 0.08 | 2.360 down  | 3.247 down | 0.00 | 179.70  | phytanoyl-CoA dioxygenase family protein         |
| 81362 | 8.71  | 0.08 | 9.08  | 0.03 | 9.85  | 0.05 | 1.290 up    | 2.199 up   | 0.00 | 340.39  | Lipoate synthase                                 |
| 81383 | 11.62 | 0.21 | 13.23 | 0.12 | 14.27 | 0.17 | 3.063 up    | 6.292 up   | 0.00 | 163.75  | GPCR . contains RGS domain                       |
| 81389 | 12.22 | 0.02 | 10.34 | 0.09 | 9.96  | 0.18 | 3.699 down  | 4.788 down | 0.00 | 166.38  | phosphate/H+ symporter                           |
| 81420 | 8.72  | 0.07 | 7.19  | 0.09 | 7.31  | 0.44 | 2.875 down  | 2.643 down | 0.02 | 13.01   | Argonaute siRNA chaperone (ARC) complex subunit  |

|       |       |      |       |      |       |      |              |            |      |         |                                       |
|-------|-------|------|-------|------|-------|------|--------------|------------|------|---------|---------------------------------------|
| 81423 | 11.59 | 0.21 | 11.46 | 0.31 | 12.89 | 0.29 | 1.091 down   | 2.463 up   | 0.01 | 23.69   | unknown protein                       |
| 81454 | 12.15 | 0.10 | 12.12 | 0.14 | 10.70 | 0.31 | 1.024 down   | 2.735 down | 0.00 | 31.87   | unknown protein                       |
| 81473 | 9.92  | 0.05 | 10.28 | 0.04 | 10.95 | 0.39 | 1.282 up     | 2.031 up   | 0.04 | 8.56    | caffeine-induced death protein 2      |
| 81511 | 11.39 | 0.09 | 10.52 | 0.04 | 10.09 | 0.25 | 1.824 down   | 2.453 down | 0.00 | 28.53   | formamidase                           |
| 81609 | 11.86 | 0.07 | 11.44 | 0.07 | 10.84 | 0.31 | 1.338 down   | 2.033 down | 0.02 | 12.39   | GH15                                  |
| 81623 | 12.73 | 0.04 | 11.84 | 0.11 | 11.43 | 0.08 | 1.859 down   | 2.465 down | 0.00 | 185.24  | unknown protein. only in Hypocreaceae |
| 81646 | 12.64 | 0.16 | 12.04 | 0.04 | 11.47 | 0.04 | 1.513 down   | 2.238 down | 0.00 | 141.24  | NADPH oxidase                         |
| 81659 | 12.31 | 0.04 | 8.98  | 0.08 | 10.44 | 0.17 | 10.047 down  | 3.646 down | 0.00 | 281.55  | unknown protein                       |
| 81676 | 10.96 | 0.02 | 10.38 | 0.12 | 8.48  | 0.53 | 1.496 down   | 5.583 down | 0.00 | 29.12   | salicylate hydroxylase                |
| 81700 | 12.67 | 0.08 | 12.48 | 0.11 | 11.24 | 0.06 | 1.144 down   | 2.691 down | 0.00 | 317.99  | mannose-6-phosphate isomerase         |
| 81720 | 11.65 | 0.01 | 11.36 | 0.06 | 10.25 | 0.26 | 1.222 down   | 2.629 down | 0.00 | 37.61   | Ume5 gen                              |
| 81730 | 10.84 | 0.02 | 11.13 | 0.16 | 11.91 | 0.23 | 1.224 up     | 2.100 up   | 0.01 | 24.99   | glutaredoxin                          |
| 81774 | 12.24 | 0.09 | 12.04 | 0.02 | 10.75 | 0.20 | 1.141 down   | 2.798 down | 0.00 | 72.24   | unknown protein                       |
| 81843 | 10.80 | 0.03 | 9.34  | 0.12 | 7.49  | 0.46 | 2.746 down   | 9.875 down | 0.00 | 60.40   | Alkaline phosphatase                  |
| 81906 | 12.39 | 0.20 | 12.94 | 0.28 | 13.60 | 0.08 | 1.461 up     | 2.310 up   | 0.00 | 36.93   | unknown protein                       |
| 81911 | 12.61 | 0.08 | 12.46 | 0.12 | 11.41 | 0.18 | 1.107 down   | 2.299 down | 0.00 | 56.94   | unknown protein                       |
| 81920 | 11.55 | 0.07 | 11.72 | 0.05 | 12.78 | 0.26 | 1.128 up     | 2.336 up   | 0.00 | 30.11   | SSCRP                                 |
| 81955 | 2.89  | 0.27 | 2.90  | 0.09 | 4.46  | 0.19 | 1.008 up     | 2.970 up   | 0.00 | 63.52   | nitrate reductase                     |
| 81979 | 13.00 | 0.03 | 9.76  | 0.07 | 10.67 | 0.13 | 9.476 down   | 5.025 down | 0.00 | 502.20  | glutathione-S-transferase             |
| 82037 | 12.52 | 0.02 | 12.74 | 0.01 | 11.08 | 0.06 | 1.163 up     | 2.719 down | 0.00 | 1080.27 | Inorganic phosphate transporter       |
| 82049 | 10.25 | 0.12 | 10.91 | 0.02 | 13.17 | 0.29 | 1.577 up     | 7.546 up   | 0.00 | 124.96  | unknown protein                       |
| 82095 | 6.16  | 0.06 | 6.23  | 0.01 | 7.49  | 0.51 | 1.055 up     | 2.518 up   | 0.02 | 10.85   | ammonium transporter. high affinity   |
| 82105 | 8.91  | 0.26 | 7.45  | 0.09 | 6.81  | 0.40 | 2.755 down   | 4.288 down | 0.01 | 26.34   | PDR-type ABC transporters             |
| 82204 | 8.08  | 0.16 | 7.92  | 0.03 | 6.79  | 0.37 | 1.113 down   | 2.439 down | 0.01 | 16.85   | ammonium transporter. high affinity   |
| 82235 | 12.76 | 0.10 | 12.99 | 0.11 | 14.27 | 0.18 | 1.174 up     | 2.844 up   | 0.00 | 82.92   | GH31 $\alpha$ -glucosidase            |
| 82246 | 11.95 | 0.01 | 12.39 | 0.07 | 13.11 | 0.10 | 1.358 up     | 2.245 up   | 0.00 | 134.65  | GCPR. mPR-type                        |
| 82286 | 12.36 | 0.02 | 12.93 | 0.02 | 13.39 | 0.29 | 1.478 up     | 2.044 up   | 0.02 | 13.92   | unknown protein                       |
| 82309 | 11.83 | 0.00 | 11.35 | 0.02 | 9.45  | 0.52 | 1.390 down   | 5.190 down | 0.01 | 28.35   | MFS permease                          |
| 82321 | 11.04 | 0.07 | 4.10  | 0.23 | 9.46  | 0.74 | 122.123 down | 2.981 down | 0.00 | 81.69   | Aquaporin                             |
| 82327 | 12.55 | 0.05 | 10.27 | 0.00 | 10.04 | 0.28 | 4.846 down   | 5.701 down | 0.00 | 94.75   | PDR-type ABC transporters             |

|        |       |      |       |      |       |      |             |            |      |        |                                            |
|--------|-------|------|-------|------|-------|------|-------------|------------|------|--------|--------------------------------------------|
| 82374  | 12.43 | 0.04 | 11.41 | 0.07 | 10.39 | 0.75 | 2.028 down  | 4.120 down | 0.04 | 8.47   | unknown protein                            |
| 82403  | 13.55 | 0.08 | 13.28 | 0.07 | 11.61 | 0.14 | 1.198 down  | 3.822 down | 0.00 | 238.93 | Acyl-CoA dehydrogenase                     |
| 82425  | 4.54  | 0.05 | 4.64  | 0.22 | 5.97  | 0.13 | 1.070 up    | 2.685 up   | 0.00 | 90.83  | unknown protein                            |
| 82523  | 9.32  | 0.16 | 9.12  | 0.13 | 8.22  | 0.17 | 1.146 down  | 2.139 down | 0.00 | 39.93  | unknown protein                            |
| 82560  | 8.44  | 0.03 | 9.50  | 0.12 | 9.95  | 0.25 | 2.091 up    | 2.857 up   | 0.00 | 37.30  | Ribokinase                                 |
| 82591  | 12.47 | 0.05 | 10.83 | 0.04 | 10.72 | 0.13 | 3.120 down  | 3.377 down | 0.00 | 202.45 | unknown protein with oxidoreductase domain |
| 82606  | 11.08 | 0.08 | 11.17 | 0.07 | 12.20 | 0.30 | 1.068 up    | 2.174 up   | 0.01 | 20.46  | Mn2+ homeostasis protein Per1              |
| 82616  | 12.20 | 0.23 | 9.83  | 0.11 | 10.03 | 0.33 | 5.179 down  | 4.507 down | 0.00 | 48.54  | GH5 membrane bound endoglucanase CEL5b     |
| 82619  | 12.74 | 0.02 | 12.92 | 0.03 | 9.54  | 0.48 | 1.131 up    | 9.196 down | 0.00 | 78.59  | arginosuccinate synthetase                 |
| 82626  | 8.46  | 0.30 | 8.59  | 0.04 | 6.77  | 0.49 | 1.093 up    | 3.230 down | 0.01 | 18.72  | half-sized ABC transporter                 |
| 82628  | 4.03  | 0.31 | 6.08  | 0.37 | 5.50  | 0.19 | 4.132 up    | 2.764 up   | 0.00 | 33.82  | acetyltransferase SidF                     |
| 82633  | 12.16 | 0.07 | 10.18 | 0.08 | 9.90  | 0.29 | 3.948 down  | 4.784 down | 0.00 | 67.84  | GH72 $\beta$ -1 3-glucanosyltransferase    |
| 82662  | 14.11 | 0.09 | 7.87  | 0.06 | 11.87 | 0.20 | 75.475 down | 4.705 down | 0.00 | 753.52 | Epl1/Sm1                                   |
| 102383 | 11.29 | 0.11 | 10.66 | 0.07 | 9.28  | 0.16 | 1.548 down  | 4.029 down | 0.00 | 167.85 | unknown protein                            |
| 102385 | 2.87  | 0.14 | 2.85  | 0.19 | 4.29  | 0.12 | 1.011 down  | 2.671 up   | 0.00 | 105.82 | unknown protein                            |
| 102386 | 6.71  | 0.25 | 7.40  | 0.12 | 7.97  | 0.26 | 1.618 up    | 2.391 up   | 0.01 | 19.16  | unique protein                             |
| 102411 | 10.42 | 0.10 | 9.81  | 0.06 | 9.02  | 0.21 | 1.522 down  | 2.640 down | 0.00 | 48.26  | unknown protein                            |
| 102416 | 10.58 | 0.12 | 9.48  | 0.13 | 9.46  | 0.10 | 2.132 down  | 2.163 down | 0.00 | 76.63  | amino acid permease PotE                   |
| 102454 | 6.28  | 0.13 | 7.08  | 0.00 | 7.39  | 0.17 | 1.741 up    | 2.160 up   | 0.00 | 41.71  | unknown protein                            |
| 102467 | 4.80  | 0.15 | 4.22  | 0.39 | 6.49  | 0.09 | 1.499 down  | 3.218 up   | 0.00 | 101.95 | unknown protein                            |
| 102499 | 2.71  | 0.06 | 2.66  | 0.04 | 5.44  | 0.71 | 1.036 down  | 6.618 up   | 0.01 | 25.12  | Zn2Cys6 transcriptional regulator          |
| 102500 | 5.32  | 0.02 | 5.12  | 0.17 | 7.26  | 0.27 | 1.148 down  | 3.845 up   | 0.00 | 82.90  | MRSP1/expansin-like                        |
| 102567 | 2.61  | 0.05 | 3.22  | 0.45 | 4.23  | 0.18 | 1.516 up    | 3.056 up   | 0.00 | 32.10  | unknown protein                            |
| 102593 | 9.10  | 0.21 | 9.73  | 0.10 | 10.44 | 0.18 | 1.550 up    | 2.534 up   | 0.00 | 40.50  | Mitochondrial ribosomal protein L17        |
| 102637 | 3.06  | 0.09 | 3.95  | 0.08 | 4.92  | 0.11 | 1.847 up    | 3.624 up   | 0.00 | 216.12 | unique protein                             |
| 102680 | 2.42  | 0.01 | 2.34  | 0.11 | 3.67  | 0.02 | 1.058 down  | 2.377 up   | 0.00 | 643.98 | unique protein                             |
| 102738 | 12.18 | 0.00 | 10.17 | 0.11 | 11.09 | 0.52 | 4.027 down  | 2.121 down | 0.02 | 12.30  | unknown protein                            |
| 102773 | 3.23  | 0.07 | 3.98  | 0.12 | 5.86  | 0.16 | 1.674 up    | 6.196 up   | 0.00 | 279.58 | unknown protein                            |
| 102774 | 4.89  | 0.02 | 5.37  | 0.37 | 7.28  | 0.51 | 1.389 up    | 5.248 up   | 0.01 | 25.71  | unknown protein                            |
| 102779 | 6.03  | 0.03 | 7.31  | 0.15 | 7.14  | 0.30 | 2.439 up    | 2.160 up   | 0.01 | 18.27  | unknown protein                            |

|        |       |      |       |      |       |      |            |             |      |        |                                                           |
|--------|-------|------|-------|------|-------|------|------------|-------------|------|--------|-----------------------------------------------------------|
| 102780 | 5.79  | 0.19 | 6.21  | 0.21 | 7.84  | 0.55 | 1.340 up   | 4.147 up    | 0.01 | 17.45  | unknown protein                                           |
| 102787 | 5.81  | 0.18 | 6.72  | 0.03 | 7.19  | 0.32 | 1.879 up   | 2.600 up    | 0.01 | 18.36  | unique protein                                            |
| 102788 | 2.81  | 0.29 | 3.06  | 0.10 | 4.57  | 0.11 | 1.186 up   | 3.375 up    | 0.00 | 99.94  | unique protein                                            |
| 102816 | 12.30 | 0.15 | 11.70 | 0.07 | 11.07 | 0.11 | 1.513 down | 2.344 down  | 0.00 | 82.91  | Zn2Cys6 transcriptional regulator                         |
| 102830 | 12.69 | 0.24 | 10.56 | 0.01 | 11.18 | 0.33 | 4.386 down | 2.858 down  | 0.00 | 31.43  | unknown protein                                           |
| 102846 | 10.73 | 0.20 | 10.43 | 0.26 | 9.57  | 0.22 | 1.230 down | 2.239 down  | 0.01 | 20.71  | unknown protein                                           |
| 102850 | 9.00  | 0.04 | 9.04  | 0.03 | 7.85  | 0.05 | 1.029 up   | 2.222 down  | 0.00 | 696.54 | unique protein                                            |
| 102851 | 9.23  | 0.12 | 11.30 | 0.17 | 12.54 | 1.01 | 4.207 up   | 9.908 up    | 0.02 | 11.70  | SSCRP                                                     |
| 102863 | 10.44 | 0.01 | 10.29 | 0.01 | 8.92  | 0.24 | 1.103 down | 2.858 down  | 0.00 | 58.72  | unknown protein                                           |
| 102876 | 6.34  | 0.19 | 6.39  | 0.02 | 5.30  | 0.37 | 1.040 up   | 2.045 down  | 0.02 | 12.39  | unique protein                                            |
| 102887 | 4.50  | 0.04 | 5.04  | 0.11 | 6.19  | 0.38 | 1.447 up   | 3.225 up    | 0.01 | 24.29  | unique protein                                            |
| 102892 | 13.39 | 0.10 | 13.17 | 0.10 | 12.01 | 0.26 | 1.165 down | 2.607 down  | 0.00 | 36.21  | unknown protein                                           |
| 102906 | 10.74 | 0.05 | 9.19  | 0.13 | 8.62  | 0.27 | 2.927 down | 4.337 down  | 0.00 | 60.77  | unique protein                                            |
| 102920 | 12.11 | 0.00 | 9.90  | 0.07 | 9.47  | 0.25 | 4.625 down | 6.239 down  | 0.00 | 121.53 | C2H2 transcriptional regulator                            |
| 102927 | 3.52  | 0.04 | 4.01  | 0.33 | 4.89  | 0.08 | 1.412 up   | 2.592 up    | 0.00 | 53.72  | Serine/threonine protein kinase                           |
| 102933 | 8.32  | 0.02 | 9.19  | 0.08 | 6.35  | 0.23 | 1.831 up   | 3.914 down  | 0.00 | 189.43 | unknown protein. only in Gibberella                       |
| 102935 | 3.11  | 0.07 | 3.28  | 0.22 | 4.68  | 0.09 | 1.124 up   | 2.963 up    | 0.00 | 146.45 | unknown protein                                           |
| 102936 | 5.65  | 0.07 | 5.95  | 0.11 | 7.48  | 0.20 | 1.234 up   | 3.549 up    | 0.00 | 104.24 | unknown protein                                           |
| 102953 | 9.59  | 0.01 | 7.98  | 0.07 | 7.35  | 0.15 | 3.052 down | 4.708 down  | 0.00 | 218.57 | dityrosine transporter. required for spore wall synthesis |
| 102960 | 10.84 | 0.04 | 11.73 | 0.09 | 12.04 | 0.25 | 1.842 up   | 2.297 up    | 0.01 | 25.15  | unique protein. 2 TM                                      |
| 102976 | 7.64  | 0.16 | 8.31  | 0.24 | 8.91  | 0.25 | 1.588 up   | 2.411 up    | 0.01 | 20.09  | unknown protein                                           |
| 102985 | 12.37 | 0.07 | 11.48 | 0.08 | 10.68 | 0.15 | 1.861 down | 3.234 down  | 0.00 | 126.08 | unknown protein                                           |
| 102999 | 6.79  | 0.09 | 9.41  | 0.12 | 10.31 | 0.39 | 6.126 up   | 11.491 up   | 0.00 | 85.82  | unknown protein                                           |
| 103015 | 10.32 | 0.11 | 7.17  | 0.03 | 6.94  | 0.26 | 8.856 down | 10.365 down | 0.00 | 194.28 | unknown protein                                           |
| 103016 | 2.73  | 0.10 | 2.65  | 0.12 | 4.16  | 0.13 | 1.057 down | 2.695 up    | 0.00 | 144.94 | unique protein                                            |
| 103032 | 3.25  | 0.11 | 3.53  | 0.14 | 5.02  | 0.16 | 1.208 up   | 3.405 up    | 0.00 | 125.26 | unknown protein                                           |
| 103034 | 8.45  | 0.31 | 6.64  | 0.06 | 5.17  | 0.12 | 3.507 down | 9.746 down  | 0.00 | 251.03 | Zn2Cys6 transcriptional regulator                         |
| 103041 | 5.10  | 0.69 | 2.83  | 0.26 | 7.73  | 0.63 | 4.814 down | 6.212 up    | 0.00 | 48.24  | acetamidase                                               |
| 103043 | 2.20  | 0.01 | 2.34  | 0.10 | 3.79  | 0.10 | 1.105 up   | 3.003 up    | 0.00 | 293.51 | unknown protein                                           |
| 103044 | 3.35  | 0.08 | 3.55  | 0.38 | 4.83  | 0.32 | 1.148 up   | 2.795 up    | 0.01 | 21.05  | unique protein                                            |

|        |       |      |       |      |       |      |             |            |      |        |                                   |
|--------|-------|------|-------|------|-------|------|-------------|------------|------|--------|-----------------------------------|
| 103049 | 5.31  | 0.24 | 4.06  | 0.41 | 6.62  | 0.24 | 2.382 down  | 2.468 up   | 0.00 | 56.32  | GH28 endo-polygalacturonase       |
| 103059 | 6.74  | 0.05 | 5.70  | 0.06 | 7.76  | 0.43 | 2.053 down  | 2.031 up   | 0.01 | 25.68  | unknown protein                   |
| 103061 | 4.04  | 0.42 | 4.41  | 0.01 | 6.10  | 0.64 | 1.298 up    | 4.189 up   | 0.02 | 12.75  | unknown protein                   |
| 103063 | 6.61  | 0.16 | 5.82  | 0.40 | 8.55  | 0.27 | 1.738 down  | 3.827 up   | 0.00 | 70.38  | unknown protein                   |
| 103064 | 8.77  | 0.04 | 6.06  | 0.00 | 10.08 | 0.24 | 6.552 down  | 2.463 up   | 0.00 | 297.95 | unknown protein                   |
| 103065 | 6.67  | 0.06 | 7.14  | 0.23 | 8.29  | 0.32 | 1.378 up    | 3.061 up   | 0.01 | 27.28  | unknown protein                   |
| 103073 | 5.68  | 0.00 | 5.96  | 0.13 | 6.71  | 0.22 | 1.205 up    | 2.041 up   | 0.01 | 25.16  | unknown protein                   |
| 103112 | 6.88  | 0.01 | 8.23  | 0.09 | 8.92  | 0.27 | 2.549 up    | 4.117 up   | 0.00 | 63.11  | unknown protein                   |
| 103114 | 3.75  | 0.00 | 3.86  | 0.24 | 5.39  | 0.29 | 1.079 up    | 3.106 up   | 0.00 | 39.63  | unknown protein                   |
| 103119 | 4.08  | 0.49 | 4.24  | 0.28 | 6.09  | 0.16 | 1.115 up    | 4.041 up   | 0.00 | 47.34  | membrane dipeptidase GliJ         |
| 103121 | 3.26  | 0.21 | 3.52  | 0.00 | 5.27  | 0.34 | 1.200 up    | 4.041 up   | 0.00 | 45.63  | unique protein                    |
| 103122 | 2.80  | 0.14 | 2.79  | 0.04 | 4.66  | 0.14 | 1.000 down  | 3.653 up   | 0.00 | 213.92 | Zn2Cys6 transcriptional regulator |
| 103129 | 4.98  | 0.24 | 5.13  | 0.43 | 6.21  | 0.20 | 1.111 up    | 2.343 up   | 0.01 | 18.78  | unknown protein                   |
| 103130 | 4.19  | 0.10 | 4.59  | 0.03 | 5.60  | 0.19 | 1.315 up    | 2.650 up   | 0.00 | 65.57  | unique protein                    |
| 103135 | 4.57  | 0.31 | 4.67  | 0.21 | 8.59  | 1.65 | 1.070 up    | 16.190 up  | 0.03 | 9.45   | SSCRP                             |
| 103136 | 3.54  | 0.10 | 4.23  | 0.10 | 4.83  | 0.11 | 1.614 up    | 2.455 up   | 0.00 | 107.96 | Glycolate oxidase                 |
| 103138 | 10.95 | 0.08 | 10.91 | 0.02 | 9.65  | 0.24 | 1.029 down  | 2.460 down | 0.00 | 44.63  | Zn2Cys6 transcriptional regulator |
| 103145 | 10.29 | 0.18 | 8.54  | 0.05 | 8.48  | 0.31 | 3.357 down  | 3.491 down | 0.00 | 36.17  | unique protein                    |
| 103147 | 14.36 | 0.03 | 13.55 | 0.10 | 11.78 | 0.35 | 1.749 down  | 5.977 down | 0.00 | 66.35  | unknown protein                   |
| 103149 | 10.91 | 0.07 | 6.74  | 0.01 | 8.20  | 0.18 | 18.085 down | 6.549 down | 0.00 | 460.98 | AAA ATPase                        |
| 103155 | 3.21  | 0.06 | 3.42  | 0.30 | 5.07  | 0.22 | 1.153 up    | 3.630 up   | 0.00 | 62.78  | unknown protein                   |
| 103156 | 8.28  | 0.05 | 3.98  | 0.21 | 6.60  | 0.18 | 19.725 down | 3.204 down | 0.00 | 341.30 | unknown protein                   |
| 103157 | 11.16 | 0.00 | 11.19 | 0.18 | 8.88  | 0.51 | 1.024 up    | 4.853 down | 0.00 | 32.63  | unknown protein                   |
| 103158 | 9.69  | 0.07 | 8.31  | 0.07 | 6.75  | 0.35 | 2.610 down  | 7.664 down | 0.00 | 78.58  | Zn2Cys6 transcriptional regulator |
| 103172 | 7.16  | 0.15 | 4.60  | 0.01 | 6.14  | 0.20 | 5.905 down  | 2.021 down | 0.00 | 113.95 | unique protein                    |
| 103174 | 3.05  | 0.09 | 3.06  | 0.11 | 5.05  | 0.15 | 1.007 up    | 4.014 up   | 0.00 | 226.43 | SSCRP                             |
| 103175 | 3.14  | 0.12 | 3.70  | 0.22 | 4.99  | 0.17 | 1.476 up    | 3.592 up   | 0.00 | 89.00  | epoxide hydrolase. putative       |
| 103176 | 4.38  | 0.33 | 4.39  | 0.18 | 5.73  | 0.24 | 1.004 up    | 2.534 up   | 0.00 | 29.14  | unknown protein                   |
| 103177 | 4.36  | 0.33 | 5.41  | 0.11 | 5.62  | 0.24 | 2.072 up    | 2.395 up   | 0.01 | 18.51  | glutathionine S-transferase       |
| 103186 | 4.26  | 0.17 | 3.81  | 0.29 | 5.34  | 0.17 | 1.367 down  | 2.113 up   | 0.00 | 45.58  | unknown protein                   |

|        |       |      |       |      |       |      |             |            |      |        |                                                                                      |
|--------|-------|------|-------|------|-------|------|-------------|------------|------|--------|--------------------------------------------------------------------------------------|
| 103189 | 6.82  | 0.20 | 5.20  | 0.05 | 5.45  | 0.32 | 3.073 down  | 2.586 down | 0.01 | 23.09  | HET protein                                                                          |
| 103193 | 8.14  | 0.16 | 4.80  | 0.55 | 5.30  | 0.18 | 10.151 down | 7.186 down | 0.00 | 81.59  | ankyrin                                                                              |
| 103205 | 6.72  | 0.05 | 9.04  | 0.38 | 8.97  | 0.68 | 5.009 up    | 4.748 up   | 0.02 | 12.54  | unknown protein                                                                      |
| 103215 | 11.54 | 0.20 | 11.06 | 0.05 | 9.92  | 0.09 | 1.392 down  | 3.073 down | 0.00 | 159.13 | Cytochrome P450 CYP4/CYP19/CYP26 subfamilies                                         |
| 103222 | 12.94 | 0.12 | 13.54 | 0.10 | 14.12 | 0.16 | 1.518 up    | 2.257 up   | 0.00 | 45.27  | Ribosomal protein S29 (S14 family) by homology to the corresponding protein of N. cr |
| 103230 | 11.42 | 0.05 | 11.25 | 0.08 | 9.16  | 0.22 | 1.127 down  | 4.801 down | 0.00 | 154.68 | Zn2Cys6 transcriptional regulator                                                    |
| 103236 | 9.66  | 0.21 | 9.01  | 0.01 | 11.13 | 0.12 | 1.562 down  | 2.773 up   | 0.00 | 195.76 | unknown protein                                                                      |
| 103286 | 2.54  | 0.08 | 2.92  | 0.43 | 4.77  | 0.23 | 1.300 up    | 4.691 up   | 0.00 | 60.77  | unique protein                                                                       |
| 103335 | 7.60  | 0.31 | 7.95  | 0.15 | 9.98  | 0.57 | 1.274 up    | 5.229 up   | 0.01 | 22.59  | unknown protein                                                                      |
| 103356 | 13.29 | 0.01 | 13.12 | 0.07 | 12.17 | 0.16 | 1.124 down  | 2.175 down | 0.00 | 67.08  | Vacuolar transporter chaperone                                                       |
| 103372 | 12.47 | 0.09 | 11.75 | 0.01 | 10.97 | 0.24 | 1.646 down  | 2.811 down | 0.00 | 44.07  | BZIP transcriptional regulator                                                       |
| 103394 | 3.38  | 0.24 | 3.27  | 0.10 | 5.06  | 0.16 | 1.079 down  | 3.209 up   | 0.00 | 103.46 | unknown protein                                                                      |
| 103395 | 3.14  | 0.27 | 3.15  | 0.05 | 4.77  | 0.26 | 1.010 up    | 3.104 up   | 0.00 | 47.50  | unknown protein                                                                      |
| 103403 | 3.53  | 0.11 | 3.90  | 0.45 | 5.19  | 0.19 | 1.289 up    | 3.154 up   | 0.00 | 34.59  | unknown protein                                                                      |
| 103423 | 5.98  | 0.19 | 5.85  | 0.09 | 7.37  | 0.44 | 1.092 down  | 2.619 up   | 0.01 | 17.14  | SSCRP                                                                                |
| 103447 | 9.47  | 0.12 | 9.61  | 0.04 | 8.26  | 0.30 | 1.104 up    | 2.307 down | 0.00 | 29.21  | unknown protein                                                                      |
| 103455 | 9.41  | 0.01 | 11.00 | 0.01 | 11.16 | 0.24 | 3.006 up    | 3.367 up   | 0.00 | 63.20  | unknown protein                                                                      |
| 103482 | 11.47 | 0.00 | 10.68 | 0.07 | 9.27  | 0.38 | 1.723 down  | 4.604 down | 0.00 | 40.21  | transcriptional activator with ariadne RING finger                                   |
| 103506 | 12.73 | 0.01 | 11.92 | 0.24 | 11.59 | 0.23 | 1.748 down  | 2.197 down | 0.01 | 20.11  | unknown protein                                                                      |
| 103537 | 6.21  | 0.19 | 10.65 | 0.01 | 10.18 | 0.33 | 21.752 up   | 15.724 up  | 0.00 | 182.26 | GCN5-N-acetyltransferase                                                             |
| 103651 | 3.33  | 0.24 | 3.73  | 0.23 | 4.86  | 0.12 | 1.319 up    | 2.880 up   | 0.00 | 58.96  | unknown protein                                                                      |
| 103653 | 2.15  | 0.10 | 2.09  | 0.02 | 3.47  | 0.07 | 1.046 down  | 2.489 up   | 0.00 | 379.26 | unique protein                                                                       |
| 103655 | 8.44  | 0.06 | 9.17  | 0.04 | 9.83  | 0.14 | 1.654 up    | 2.620 up   | 0.00 | 109.18 | rad55                                                                                |
| 103668 | 9.95  | 0.07 | 9.52  | 0.02 | 8.63  | 0.56 | 1.348 down  | 2.508 down | 0.05 | 7.11   | unique protein                                                                       |
| 103671 | 11.33 | 0.08 | 10.65 | 0.03 | 9.40  | 0.33 | 1.602 down  | 3.810 down | 0.00 | 42.11  | unknown protein                                                                      |
| 103683 | 6.18  | 0.35 | 6.91  | 0.04 | 5.13  | 0.11 | 1.654 up    | 2.075 down | 0.00 | 73.27  | unique protein                                                                       |
| 103694 | 11.90 | 0.14 | 11.72 | 0.14 | 9.26  | 0.46 | 1.135 down  | 6.223 down | 0.00 | 48.04  | PTH11 GPCR                                                                           |
| 103715 | 5.65  | 0.21 | 6.10  | 0.17 | 7.62  | 0.41 | 1.364 up    | 3.923 up   | 0.01 | 27.50  | unique protein                                                                       |
| 103778 | 3.65  | 0.07 | 3.59  | 0.07 | 6.40  | 0.40 | 1.045 down  | 6.708 up   | 0.00 | 79.82  | unique protein                                                                       |
| 103798 | 11.55 | 0.16 | 10.22 | 0.02 | 9.72  | 0.32 | 2.520 down  | 3.567 down | 0.00 | 33.46  | SSCRP                                                                                |

|        |       |      |       |      |       |      |            |             |      |        |                                                                            |
|--------|-------|------|-------|------|-------|------|------------|-------------|------|--------|----------------------------------------------------------------------------|
| 103799 | 10.91 | 0.01 | 10.32 | 0.15 | 9.40  | 0.17 | 1.497 down | 2.834 down  | 0.00 | 76.07  | unique protein                                                             |
| 103804 | 12.60 | 0.17 | 12.22 | 0.15 | 11.32 | 0.22 | 1.300 down | 2.422 down  | 0.00 | 31.56  | SWI-SNF chromatin-remodeling complex protein                               |
| 103852 | 11.98 | 0.04 | 12.06 | 0.03 | 10.78 | 0.23 | 1.057 up   | 2.304 down  | 0.00 | 49.70  | unknown protein                                                            |
| 103863 | 4.35  | 0.08 | 4.64  | 0.02 | 5.84  | 0.32 | 1.224 up   | 2.825 up    | 0.00 | 30.71  | unknown protein                                                            |
| 103886 | 14.40 | 0.24 | 14.27 | 0.16 | 12.95 | 0.14 | 1.097 down | 2.746 down  | 0.00 | 66.66  | unknown protein                                                            |
| 103898 | 8.04  | 0.16 | 9.09  | 0.30 | 9.25  | 0.31 | 2.071 up   | 2.304 up    | 0.02 | 12.59  | unknown protein                                                            |
| 103900 | 3.16  | 0.15 | 3.22  | 0.19 | 4.96  | 0.09 | 1.039 up   | 3.474 up    | 0.00 | 191.33 | unknown protein                                                            |
| 103907 | 6.95  | 0.30 | 7.42  | 0.00 | 5.06  | 0.61 | 1.380 up   | 3.721 down  | 0.01 | 19.15  | unknown protein                                                            |
| 103930 | 12.39 | 0.05 | 12.06 | 0.00 | 10.94 | 0.39 | 1.251 down | 2.725 down  | 0.01 | 18.13  | unknown protein                                                            |
| 103949 | 7.71  | 0.11 | 7.94  | 0.15 | 8.96  | 0.35 | 1.170 up   | 2.376 up    | 0.01 | 16.06  | unknown protein                                                            |
| 103959 | 3.26  | 0.21 | 3.16  | 0.08 | 4.72  | 0.12 | 1.069 down | 2.748 up    | 0.00 | 123.91 | unique protein                                                             |
| 103960 | 8.69  | 0.12 | 7.45  | 0.08 | 7.05  | 0.25 | 2.353 down | 3.107 down  | 0.00 | 43.86  | nitrilase                                                                  |
| 103973 | 5.61  | 0.50 | 6.10  | 0.21 | 7.84  | 0.59 | 1.398 up   | 4.665 up    | 0.01 | 15.14  | unknown protein                                                            |
| 104000 | 10.69 | 0.14 | 11.63 | 0.12 | 11.80 | 0.12 | 1.918 up   | 2.158 up    | 0.00 | 53.59  | DNA repair protein rad18                                                   |
| 104016 | 11.64 | 0.10 | 11.81 | 0.05 | 10.59 | 0.12 | 1.120 up   | 2.070 down  | 0.00 | 120.11 | unknown protein                                                            |
| 104046 | 3.28  | 0.14 | 3.67  | 0.43 | 4.79  | 0.11 | 1.311 up   | 2.853 up    | 0.00 | 37.43  | unique protein                                                             |
| 104050 | 4.20  | 0.35 | 3.56  | 0.41 | 8.09  | 0.98 | 1.559 down | 14.834 up   | 0.01 | 28.16  | SSCRP                                                                      |
| 104054 | 3.82  | 0.03 | 3.88  | 0.14 | 5.72  | 0.24 | 1.043 up   | 3.720 up    | 0.00 | 88.32  | unknown protein                                                            |
| 104059 | 3.45  | 0.37 | 3.36  | 0.28 | 5.30  | 0.15 | 1.067 down | 3.602 up    | 0.00 | 65.02  | short chain dehydrognease/reductase                                        |
| 104060 | 3.25  | 0.38 | 2.99  | 0.20 | 4.97  | 0.32 | 1.197 down | 3.301 up    | 0.00 | 35.54  | short chain dehydrognease/reductase                                        |
| 104064 | 3.52  | 0.29 | 3.44  | 0.13 | 5.39  | 0.42 | 1.057 down | 3.660 up    | 0.00 | 29.44  | unknown protein                                                            |
| 104067 | 3.70  | 0.01 | 3.48  | 0.11 | 6.35  | 0.61 | 1.162 down | 6.266 up    | 0.00 | 33.90  | unknown protein                                                            |
| 104071 | 4.47  | 0.05 | 4.44  | 0.39 | 5.83  | 0.28 | 1.019 down | 2.566 up    | 0.01 | 23.71  | unknown protein                                                            |
| 104075 | 10.93 | 0.22 | 10.65 | 0.22 | 9.52  | 0.41 | 1.213 down | 2.653 down  | 0.02 | 13.92  | Zn2Cys6 transcriptional regulator                                          |
| 104077 | 10.78 | 0.02 | 10.41 | 0.06 | 7.17  | 0.92 | 1.291 down | 12.210 down | 0.01 | 23.05  | Amino acid transporter PotE                                                |
| 104079 | 4.72  | 0.22 | 4.56  | 0.09 | 6.57  | 0.32 | 1.112 down | 3.604 up    | 0.00 | 51.52  | MRSP1/expansin-like                                                        |
| 104081 | 5.55  | 0.13 | 5.51  | 0.20 | 7.12  | 0.73 | 1.026 down | 2.959 up    | 0.04 | 7.62   | coenzyme F420-dependent N5.N10-methylene tetrahydromethanopterin reductase |
| 104106 | 4.16  | 0.11 | 4.05  | 0.14 | 5.47  | 0.16 | 1.073 down | 2.488 up    | 0.00 | 90.42  | ADP/ATP carrier protein                                                    |
| 104109 | 4.44  | 0.13 | 4.60  | 0.02 | 5.66  | 0.20 | 1.121 up   | 2.331 up    | 0.00 | 47.52  | unique protein                                                             |
| 104118 | 3.27  | 0.25 | 3.48  | 0.27 | 5.81  | 0.44 | 1.156 up   | 5.813 up    | 0.00 | 41.37  | unique protein                                                             |

|        |       |      |       |      |       |      |             |            |      |        |                                                        |
|--------|-------|------|-------|------|-------|------|-------------|------------|------|--------|--------------------------------------------------------|
| 104140 | 9.55  | 0.01 | 10.93 | 0.18 | 10.91 | 0.27 | 2.606 up    | 2.557 up   | 0.01 | 26.90  | 3-hydroxi-isobutyrate dehydrogenase                    |
| 104157 | 3.30  | 0.00 | 3.27  | 0.36 | 4.49  | 0.05 | 1.015 down  | 2.282 up   | 0.00 | 53.68  | unique protein                                         |
| 104168 | 6.42  | 0.07 | 7.75  | 0.00 | 7.55  | 0.35 | 2.519 up    | 2.197 up   | 0.01 | 14.76  | unknown protein                                        |
| 104173 | 5.53  | 0.02 | 4.90  | 0.05 | 6.84  | 0.21 | 1.554 down  | 2.475 up   | 0.00 | 103.48 | unique protein                                         |
| 104175 | 4.33  | 0.13 | 4.61  | 0.13 | 5.71  | 0.15 | 1.211 up    | 2.594 up   | 0.00 | 79.90  | unique protein                                         |
| 104180 | 9.55  | 0.14 | 6.27  | 0.46 | 8.29  | 0.13 | 9.686 down  | 2.395 down | 0.00 | 97.31  | Ankyrin                                                |
| 104181 | 4.71  | 0.11 | 6.34  | 0.14 | 6.93  | 0.26 | 3.106 up    | 4.664 up   | 0.00 | 69.97  | SSCRP                                                  |
| 104182 | 11.47 | 0.06 | 10.30 | 0.04 | 8.47  | 0.34 | 2.242 down  | 7.991 down | 0.00 | 94.62  | Zn2Cys6 transcriptional regulator                      |
| 104200 | 6.26  | 0.08 | 8.24  | 0.32 | 8.67  | 0.47 | 3.939 up    | 5.335 up   | 0.01 | 26.30  | unknown protein. F-box                                 |
| 104201 | 2.98  | 0.09 | 2.90  | 0.04 | 4.36  | 0.20 | 1.064 down  | 2.585 up   | 0.00 | 80.18  | unknown protein                                        |
| 104206 | 3.67  | 0.03 | 3.95  | 0.31 | 4.69  | 0.21 | 1.211 up    | 2.035 up   | 0.01 | 18.00  | SSCRP                                                  |
| 104209 | 3.76  | 0.11 | 3.96  | 0.16 | 5.57  | 0.32 | 1.146 up    | 3.511 up   | 0.00 | 43.07  | unknown protein                                        |
| 104211 | 8.37  | 0.09 | 4.41  | 0.21 | 12.97 | 0.28 | 15.509 down | 24.344 up  | 0.00 | 883.18 | FKBP-type peptidyl-prolyl cis-trans isomerase          |
| 104215 | 8.09  | 0.05 | 7.55  | 0.04 | 6.38  | 0.07 | 1.454 down  | 3.289 down | 0.00 | 537.69 | unknown protein                                        |
| 104227 | 4.10  | 0.27 | 3.94  | 0.25 | 8.49  | 1.38 | 1.120 down  | 21.005 up  | 0.01 | 17.09  | SSCRP                                                  |
| 104228 | 2.54  | 0.26 | 2.48  | 0.08 | 3.98  | 0.16 | 1.048 down  | 2.701 up   | 0.00 | 71.49  | unique protein                                         |
| 104231 | 12.70 | 0.11 | 12.57 | 0.08 | 11.63 | 0.10 | 1.087 down  | 2.094 down | 0.00 | 109.37 | unknown protein                                        |
| 104260 | 5.98  | 0.21 | 6.37  | 0.06 | 7.87  | 0.28 | 1.303 up    | 3.683 up   | 0.00 | 51.47  | unknown protein                                        |
| 104261 | 6.25  | 0.13 | 6.65  | 0.23 | 8.83  | 0.41 | 1.323 up    | 6.012 up   | 0.00 | 50.30  | GCN5-related N-acetyltransferase                       |
| 104276 | 9.57  | 0.08 | 9.91  | 0.22 | 8.16  | 0.20 | 1.269 up    | 2.652 down | 0.00 | 72.16  | unknown protein                                        |
| 104277 | 13.33 | 0.32 | 12.37 | 0.05 | 11.80 | 0.47 | 1.942 down  | 2.882 down | 0.03 | 10.27  | cell wall protein. distantly related to A. niger CwpA. |
| 104286 | 3.33  | 0.16 | 3.42  | 0.10 | 4.84  | 0.13 | 1.065 up    | 2.845 up   | 0.00 | 121.82 | unique protein                                         |
| 104289 | 4.34  | 0.06 | 4.27  | 0.07 | 5.67  | 0.14 | 1.048 down  | 2.528 up   | 0.00 | 145.74 | unique protein                                         |
| 104292 | 7.50  | 0.09 | 8.35  | 0.01 | 8.77  | 0.42 | 1.803 up    | 2.411 up   | 0.03 | 10.22  | mating type pheromone precursor. alpha type            |
| 104293 | 5.98  | 0.54 | 6.49  | 0.48 | 8.14  | 0.21 | 1.430 up    | 4.472 up   | 0.01 | 28.34  | HFB5                                                   |
| 104294 | 4.48  | 0.47 | 4.76  | 0.24 | 6.93  | 0.20 | 1.215 up    | 5.465 up   | 0.00 | 67.34  | unknown protein                                        |
| 104295 | 7.24  | 0.16 | 4.88  | 0.32 | 9.76  | 0.67 | 5.144 down  | 5.720 up   | 0.00 | 56.23  | unknown protein                                        |
| 104304 | 10.28 | 0.15 | 9.01  | 0.06 | 8.34  | 0.25 | 2.406 down  | 3.822 down | 0.00 | 57.79  | unknown protein                                        |
| 104334 | 13.09 | 0.07 | 12.88 | 0.07 | 12.04 | 0.32 | 1.156 down  | 2.076 down | 0.02 | 14.20  | unknown protein                                        |
| 104335 | 5.40  | 0.42 | 5.73  | 0.00 | 6.56  | 0.15 | 1.256 up    | 2.224 up   | 0.01 | 21.62  | unknown protein                                        |



|        |       |      |       |      |       |      |            |            |      |        |                                                                    |
|--------|-------|------|-------|------|-------|------|------------|------------|------|--------|--------------------------------------------------------------------|
| 104336 | 3.54  | 0.33 | 3.13  | 0.09 | 5.14  | 0.15 | 1.324 down | 3.040 up   | 0.00 | 91.88  | unique protein                                                     |
| 104351 | 6.35  | 0.01 | 7.63  | 0.05 | 7.87  | 0.29 | 2.431 up   | 2.871 up   | 0.00 | 30.81  | unique protein                                                     |
| 104353 | 4.64  | 0.02 | 5.36  | 0.33 | 5.78  | 0.29 | 1.651 up   | 2.210 up   | 0.02 | 11.91  | unknown protein. contains F-box                                    |
| 104354 | 3.27  | 0.05 | 3.34  | 0.31 | 4.70  | 0.27 | 1.047 up   | 2.685 up   | 0.00 | 30.58  | SSCRP                                                              |
| 104368 | 5.69  | 0.50 | 5.89  | 0.28 | 7.64  | 0.40 | 1.153 up   | 3.884 up   | 0.01 | 21.47  | unknown protein                                                    |
| 104369 | 3.78  | 0.12 | 3.70  | 0.22 | 5.23  | 0.15 | 1.052 down | 2.744 up   | 0.00 | 85.25  | unknown protein                                                    |
| 104373 | 2.93  | 0.12 | 3.22  | 0.09 | 4.96  | 0.20 | 1.217 up   | 4.060 up   | 0.00 | 124.78 | MRSP1/expansin-like                                                |
| 104377 | 11.82 | 0.02 | 11.56 | 0.05 | 9.53  | 0.31 | 1.198 down | 4.890 down | 0.00 | 79.65  | unknown protein                                                    |
| 104380 | 8.36  | 0.13 | 7.27  | 0.00 | 5.84  | 0.30 | 2.130 down | 5.726 down | 0.00 | 79.63  | Zn2Cys6 transcriptional regulator                                  |
| 104390 | 9.31  | 0.04 | 11.22 | 0.31 | 7.95  | 0.26 | 3.773 up   | 2.563 down | 0.00 | 121.61 | glutathione S-transferase                                          |
| 104395 | 10.21 | 0.00 | 10.35 | 0.03 | 8.77  | 0.27 | 1.098 up   | 2.721 down | 0.00 | 51.16  | unknown protein                                                    |
| 104399 | 2.50  | 0.00 | 2.70  | 0.05 | 3.93  | 0.06 | 1.149 up   | 2.696 up   | 0.00 | 634.28 | unique protein                                                     |
| 104419 | 3.89  | 0.25 | 3.77  | 0.37 | 5.94  | 0.42 | 1.090 down | 4.138 up   | 0.00 | 30.44  | unique protein. secreted                                           |
| 104421 | 2.93  | 0.07 | 3.22  | 0.17 | 4.97  | 0.10 | 1.220 up   | 4.106 up   | 0.00 | 270.16 | unknown protein                                                    |
| 104422 | 3.22  | 0.13 | 2.73  | 0.10 | 6.41  | 0.62 | 1.407 down | 9.137 up   | 0.00 | 50.18  | unknown protein                                                    |
| 104423 | 5.10  | 0.35 | 4.38  | 0.09 | 7.12  | 0.35 | 1.648 down | 4.053 up   | 0.00 | 58.58  | MRSP1/expansin-like                                                |
| 104437 | 11.49 | 0.15 | 13.25 | 0.05 | 12.81 | 0.11 | 3.382 up   | 2.494 up   | 0.00 | 140.96 | unknown protein                                                    |
| 104490 | 9.80  | 0.14 | 10.21 | 0.24 | 11.54 | 0.32 | 1.325 up   | 3.345 up   | 0.00 | 31.37  | v-SNARE Gos1. Golgi transport                                      |
| 104501 | 2.41  | 0.11 | 2.56  | 0.06 | 4.10  | 0.14 | 1.112 up   | 3.236 up   | 0.00 | 166.92 | unique protein                                                     |
| 104511 | 8.20  | 0.03 | 8.12  | 0.06 | 9.36  | 0.23 | 1.060 down | 2.225 up   | 0.00 | 43.91  | unique protein                                                     |
| 104513 | 10.62 | 0.07 | 10.37 | 0.12 | 9.52  | 0.17 | 1.188 down | 2.135 down | 0.00 | 46.75  | Zn2Cys6 transcriptional regulator                                  |
| 104533 | 2.45  | 0.10 | 2.41  | 0.07 | 4.12  | 0.11 | 1.025 down | 3.190 up   | 0.00 | 293.98 | unique protein                                                     |
| 104556 | 5.79  | 0.15 | 6.08  | 0.09 | 9.39  | 0.54 | 1.223 up   | 12.129 up  | 0.00 | 67.35  | unknown protein                                                    |
| 104557 | 10.32 | 0.08 | 7.52  | 0.14 | 8.49  | 0.06 | 6.959 down | 3.565 down | 0.00 | 553.15 | short-chain dehydrogenase/reductase                                |
| 104576 | 2.20  | 0.07 | 2.23  | 0.08 | 3.67  | 0.03 | 1.023 up   | 2.780 up   | 0.00 | 676.14 | unique protein                                                     |
| 104577 | 3.77  | 0.20 | 3.91  | 0.06 | 5.19  | 0.07 | 1.095 up   | 2.664 up   | 0.00 | 155.81 | unique protein                                                     |
| 104585 | 6.26  | 0.11 | 6.14  | 0.02 | 7.45  | 0.38 | 1.082 down | 2.283 up   | 0.01 | 17.25  | unknown protein                                                    |
| 104592 | 3.89  | 0.30 | 3.76  | 0.34 | 5.36  | 0.15 | 1.093 down | 2.779 up   | 0.00 | 43.21  | unknown protein                                                    |
| 104593 | 6.60  | 0.13 | 5.05  | 0.25 | 5.06  | 0.11 | 2.936 down | 2.909 down | 0.00 | 77.80  | unknown protein with ankyrin. Leu-zipper and WD40                  |
| 104595 | 10.68 | 0.08 | 10.86 | 0.06 | 11.81 | 0.36 | 1.134 up   | 2.185 up   | 0.02 | 14.04  | Ribosomal protein L7Ae/L30e/S12e/Gadd45. Homologue of yeast SNU13. |

|        |       |      |       |      |       |      |            |            |      |        |                                                       |
|--------|-------|------|-------|------|-------|------|------------|------------|------|--------|-------------------------------------------------------|
| 104599 | 10.45 | 0.08 | 8.79  | 0.13 | 8.00  | 0.22 | 3.147 down | 5.473 down | 0.00 | 117.20 | Mandelate racemase/muconate lactonizing enzyme        |
| 104601 | 8.23  | 0.13 | 8.36  | 0.08 | 7.09  | 0.38 | 1.094 up   | 2.201 down | 0.01 | 15.95  | unknown protein                                       |
| 104617 | 12.45 | 0.04 | 12.17 | 0.13 | 11.03 | 0.14 | 1.218 down | 2.670 down | 0.00 | 105.00 |                                                       |
| 104695 | 4.37  | 0.05 | 3.59  | 0.32 | 5.53  | 0.36 | 1.708 down | 2.243 up   | 0.01 | 27.90  | unique protein                                        |
| 104715 | 2.47  | 0.16 | 2.46  | 0.15 | 4.01  | 0.07 | 1.005 down | 2.905 up   | 0.00 | 192.79 | unique protein                                        |
| 104716 | 3.01  | 0.11 | 3.12  | 0.38 | 5.01  | 0.10 | 1.076 up   | 3.999 up   | 0.00 | 100.42 | unique protein                                        |
| 104741 | 11.06 | 0.09 | 10.13 | 0.04 | 8.93  | 0.25 | 1.902 down | 4.389 down | 0.00 | 78.30  | unknown protein                                       |
| 104744 | 11.34 | 0.11 | 11.49 | 0.15 | 12.53 | 0.41 | 1.111 up   | 2.282 up   | 0.02 | 11.59  | cytochrome c oxidase assembly protein COX19. putative |
| 104762 | 7.57  | 0.09 | 8.36  | 0.14 | 8.60  | 0.11 | 1.727 up   | 2.041 up   | 0.00 | 53.53  | unknown protein                                       |
| 104795 | 7.58  | 0.18 | 8.07  | 0.10 | 9.28  | 0.12 | 1.407 up   | 3.245 up   | 0.00 | 128.94 | unique protein                                        |
| 104820 | 9.48  | 0.04 | 9.02  | 0.03 | 8.43  | 0.41 | 1.371 down | 2.073 down | 0.04 | 7.86   | unknown protein                                       |
| 104842 | 11.37 | 0.23 | 11.36 | 0.21 | 10.20 | 0.28 | 1.005 down | 2.241 down | 0.01 | 19.95  | transthyretin-like protein                            |
| 104911 | 11.79 | 0.01 | 11.65 | 0.00 | 10.72 | 0.14 | 1.099 down | 2.097 down | 0.00 | 87.85  | unknown protein                                       |
| 104923 | 3.28  | 0.18 | 3.38  | 0.00 | 4.91  | 0.22 | 1.072 up   | 3.090 up   | 0.00 | 69.98  | unique protein                                        |
| 104925 | 8.63  | 0.00 | 9.43  | 0.03 | 7.14  | 0.35 | 1.743 up   | 2.802 down | 0.00 | 52.00  | unknown protein                                       |
| 104927 | 7.68  | 0.16 | 9.46  | 0.11 | 9.73  | 0.39 | 3.427 up   | 4.123 up   | 0.00 | 29.55  | unique protein                                        |
| 104968 | 12.02 | 0.11 | 11.73 | 0.07 | 10.55 | 0.10 | 1.229 down | 2.768 down | 0.00 | 188.37 | unknown protein                                       |
| 104972 | 13.65 | 0.12 | 13.24 | 0.16 | 12.59 | 0.29 | 1.330 down | 2.083 down | 0.02 | 13.85  | glutathione synthase                                  |
| 105003 | 11.25 | 0.04 | 8.94  | 0.16 | 9.21  | 0.28 | 4.968 down | 4.113 down | 0.00 | 66.87  | unknown protein                                       |
| 105027 | 5.23  | 0.27 | 5.36  | 0.11 | 6.39  | 0.15 | 1.093 up   | 2.231 up   | 0.00 | 38.47  | unknown protein                                       |
| 105106 | 12.96 | 0.02 | 13.28 | 0.03 | 10.36 | 0.42 | 1.255 up   | 6.057 down | 0.00 | 73.35  | unique protein                                        |
| 105133 | 5.90  | 0.02 | 6.45  | 0.08 | 7.06  | 0.23 | 1.460 up   | 2.238 up   | 0.01 | 28.04  | unknown protein                                       |
| 105143 | 9.41  | 0.20 | 9.81  | 0.08 | 11.95 | 0.49 | 1.323 up   | 5.834 up   | 0.00 | 36.53  | unique protein                                        |
| 105154 | 4.59  | 0.03 | 4.59  | 0.02 | 6.05  | 0.53 | 1.002 down | 2.745 up   | 0.02 | 12.46  | unknown protein                                       |
| 105155 | 4.21  | 0.24 | 4.63  | 0.33 | 6.28  | 0.16 | 1.334 up   | 4.191 up   | 0.00 | 72.04  | unknown protein                                       |
| 105156 | 3.52  | 0.40 | 3.57  | 0.11 | 6.94  | 0.73 | 1.034 up   | 10.673 up  | 0.00 | 32.41  | unique protein                                        |
| 105157 | 3.07  | 0.02 | 3.09  | 0.08 | 5.23  | 0.10 | 1.011 up   | 4.445 up   | 0.00 | 651.12 | unknown protein                                       |
| 105158 | 7.00  | 0.06 | 7.48  | 0.20 | 5.78  | 0.10 | 1.390 up   | 2.330 down | 0.00 | 155.15 | unknown protein                                       |
| 105167 | 3.43  | 0.21 | 3.59  | 0.28 | 4.93  | 0.09 | 1.123 up   | 2.845 up   | 0.00 | 68.27  | unique protein                                        |
| 105171 | 3.65  | 0.23 | 3.68  | 0.15 | 5.81  | 0.16 | 1.023 up   | 4.463 up   | 0.00 | 145.59 | unknown protein                                       |

|        |       |      |       |      |       |      |            |             |      |         |                                                     |
|--------|-------|------|-------|------|-------|------|------------|-------------|------|---------|-----------------------------------------------------|
| 105173 | 2.62  | 0.15 | 2.73  | 0.24 | 4.38  | 0.21 | 1.076 up   | 3.365 up    | 0.00 | 69.68   | unknown protein                                     |
| 105187 | 6.56  | 0.15 | 6.38  | 0.02 | 8.52  | 0.36 | 1.130 down | 3.887 up    | 0.00 | 50.55   | unknown protein                                     |
| 105206 | 4.55  | 0.31 | 5.03  | 0.00 | 6.34  | 0.36 | 1.399 up   | 3.470 up    | 0.01 | 25.91   | unique protein                                      |
| 105220 | 6.40  | 0.39 | 3.96  | 0.35 | 4.59  | 0.09 | 5.424 down | 3.525 down  | 0.00 | 55.86   | unknown protein                                     |
| 105221 | 3.70  | 0.31 | 2.98  | 0.41 | 4.72  | 0.05 | 1.650 down | 2.028 up    | 0.00 | 40.61   | unknown protein                                     |
| 105222 | 3.84  | 0.09 | 3.95  | 0.15 | 5.71  | 0.34 | 1.081 up   | 3.648 up    | 0.00 | 43.69   | unique protein                                      |
| 105223 | 8.62  | 0.06 | 8.38  | 0.26 | 6.42  | 0.24 | 1.179 down | 4.591 down  | 0.00 | 87.86   | unknown protein                                     |
| 105233 | 2.86  | 0.01 | 2.69  | 0.06 | 4.34  | 0.03 | 1.129 down | 2.785 up    | 0.00 | 2054.93 | unique protein                                      |
| 105239 | 11.56 | 0.15 | 11.34 | 0.13 | 9.98  | 0.14 | 1.161 down | 2.977 down  | 0.00 | 110.89  | Zn2Cys6 transcriptional regulator                   |
| 105246 | 3.77  | 0.13 | 4.35  | 0.31 | 5.70  | 0.18 | 1.488 up   | 3.805 up    | 0.00 | 67.49   | GH23 exo- $\beta$ -1.3-glucanase. distantly related |
| 105247 | 3.19  | 0.23 | 3.44  | 0.17 | 5.19  | 0.06 | 1.196 up   | 4.006 up    | 0.00 | 188.44  | dipeptidyl peptidase 5                              |
| 105251 | 9.70  | 0.07 | 9.46  | 0.06 | 8.26  | 0.30 | 1.185 down | 2.724 down  | 0.00 | 31.24   | unknown protein                                     |
| 105255 | 9.46  | 0.15 | 8.77  | 0.14 | 7.05  | 0.34 | 1.609 down | 5.298 down  | 0.00 | 57.77   | Zn2Cys6 transcriptional regulator                   |
| 105260 | 11.56 | 0.08 | 10.04 | 0.26 | 7.90  | 0.47 | 2.886 down | 12.720 down | 0.00 | 64.07   | MFS permease                                        |
| 105263 | 11.69 | 0.19 | 11.24 | 0.00 | 10.00 | 0.12 | 1.364 down | 3.222 down  | 0.00 | 146.52  | Zn2Cys6 transcriptional regulator                   |
| 105269 | 9.61  | 0.10 | 8.88  | 0.04 | 8.60  | 0.19 | 1.661 down | 2.011 down  | 0.00 | 28.97   | Zn2Cys6 transcriptional regulator                   |
| 105279 | 4.80  | 0.34 | 3.90  | 0.10 | 5.98  | 0.71 | 1.861 down | 2.277 up    | 0.03 | 9.49    | Leucine aminopeptidase 1                            |
| 105286 | 4.55  | 0.12 | 4.22  | 0.23 | 5.90  | 0.14 | 1.261 down | 2.546 up    | 0.00 | 90.36   | unknown protein                                     |
| 105290 | 5.58  | 0.15 | 4.88  | 0.43 | 6.81  | 0.53 | 1.631 down | 2.336 up    | 0.02 | 13.16   | unknown protein                                     |
| 105307 | 9.30  | 0.01 | 10.03 | 0.25 | 10.90 | 0.59 | 1.649 up   | 3.013 up    | 0.04 | 7.90    | 40s mitochondrial ribosome subunit protein Mrp17    |
| 105311 | 10.60 | 0.13 | 11.26 | 0.21 | 12.63 | 0.30 | 1.576 up   | 4.079 up    | 0.00 | 47.62   | SSCRP                                               |
| 105330 | 5.23  | 0.38 | 4.48  | 0.06 | 7.23  | 0.47 | 1.687 down | 3.985 up    | 0.00 | 36.96   | unknown protein                                     |
| 105336 | 5.04  | 0.35 | 5.32  | 0.04 | 6.47  | 0.33 | 1.210 up   | 2.696 up    | 0.01 | 19.01   | unknown protein                                     |
| 105338 | 3.00  | 0.24 | 3.26  | 0.21 | 5.23  | 0.28 | 1.199 up   | 4.693 up    | 0.00 | 66.45   | unknown protein                                     |
| 105363 | 11.53 | 0.05 | 9.03  | 0.19 | 8.69  | 0.56 | 5.675 down | 7.165 down  | 0.00 | 29.16   | aldolase/citrate lyase family protein               |
| 105381 | 10.01 | 0.22 | 10.41 | 0.22 | 11.22 | 0.32 | 1.324 up   | 2.320 up    | 0.02 | 13.97   | unknown protein                                     |
| 105383 | 3.58  | 0.00 | 3.80  | 0.44 | 5.58  | 0.26 | 1.162 up   | 3.994 up    | 0.00 | 44.75   | unknown protein                                     |
| 105385 | 4.14  | 0.04 | 4.10  | 0.34 | 5.44  | 0.18 | 1.030 down | 2.463 up    | 0.00 | 40.31   | unknown protein                                     |
| 105386 | 12.27 | 0.12 | 12.15 | 0.11 | 10.81 | 0.23 | 1.081 down | 2.736 down  | 0.00 | 54.56   | unknown protein                                     |
| 105391 | 2.84  | 0.02 | 3.09  | 0.03 | 4.98  | 0.12 | 1.189 up   | 4.408 up    | 0.00 | 435.83  | unknown protein                                     |

|        |       |      |       |      |       |      |             |            |      |        |                                                           |
|--------|-------|------|-------|------|-------|------|-------------|------------|------|--------|-----------------------------------------------------------|
| 105393 | 6.37  | 0.06 | 5.78  | 0.08 | 7.87  | 0.48 | 1.500 down  | 2.832 up   | 0.01 | 23.89  | unknown protein                                           |
| 105405 | 3.12  | 0.07 | 2.89  | 0.09 | 4.70  | 0.29 | 1.174 down  | 2.990 up   | 0.00 | 55.05  | unique protein                                            |
| 105444 | 5.47  | 0.21 | 4.84  | 0.21 | 6.88  | 0.30 | 1.549 down  | 2.658 up   | 0.00 | 44.05  | SSCRP                                                     |
| 105445 | 2.81  | 0.05 | 2.88  | 0.02 | 4.45  | 0.13 | 1.048 up    | 3.096 up   | 0.00 | 250.64 | unknown protein. only in Neurospora and A. fumigatus      |
| 105447 | 4.99  | 0.20 | 4.89  | 0.19 | 7.02  | 0.33 | 1.074 down  | 4.082 up   | 0.00 | 53.72  | unknown protein                                           |
| 105448 | 3.29  | 0.22 | 3.57  | 0.27 | 5.80  | 0.40 | 1.215 up    | 5.686 up   | 0.00 | 47.65  | CBM 13                                                    |
| 105449 | 3.27  | 0.16 | 3.30  | 0.11 | 5.16  | 0.29 | 1.020 up    | 3.699 up   | 0.00 | 61.32  | Cyclin C-dependent kinase CDK8                            |
| 105455 | 8.79  | 0.04 | 7.04  | 0.24 | 7.48  | 0.37 | 3.385 down  | 2.493 down | 0.01 | 18.56  | unknown protein                                           |
| 105457 | 3.13  | 0.02 | 3.38  | 0.12 | 4.56  | 0.11 | 1.195 up    | 2.697 up   | 0.00 | 175.60 | unknown protein                                           |
| 105467 | 3.40  | 0.29 | 3.47  | 0.16 | 5.23  | 0.10 | 1.053 up    | 3.546 up   | 0.00 | 115.97 | unknown protein                                           |
| 105488 | 6.17  | 0.07 | 6.39  | 0.23 | 7.24  | 0.05 | 1.162 up    | 2.099 up   | 0.00 | 75.24  | unknown protein                                           |
| 105514 | 11.01 | 0.12 | 6.45  | 0.03 | 9.52  | 0.66 | 23.554 down | 2.801 down | 0.00 | 41.87  | unique protein                                            |
| 105515 | 11.50 | 0.17 | 13.05 | 0.11 | 13.90 | 0.13 | 2.915 up    | 5.259 up   | 0.00 | 216.53 | unique protein                                            |
| 105518 | 11.91 | 0.04 | 10.56 | 0.10 | 9.27  | 0.16 | 2.552 down  | 6.245 down | 0.00 | 260.59 | K+ channel                                                |
| 105532 | 6.28  | 0.04 | 5.52  | 0.13 | 7.50  | 0.59 | 1.695 down  | 2.322 up   | 0.02 | 13.17  | unique protein                                            |
| 105537 | 7.11  | 0.10 | 7.18  | 0.02 | 6.03  | 0.16 | 1.051 up    | 2.108 down | 0.00 | 72.40  | unknown protein                                           |
| 105540 | 5.25  | 0.28 | 5.20  | 0.24 | 6.50  | 0.40 | 1.033 down  | 2.368 up   | 0.02 | 12.82  | unique protein                                            |
| 105553 | 6.67  | 0.57 | 7.12  | 0.27 | 9.76  | 0.69 | 1.363 up    | 8.518 up   | 0.01 | 22.60  | unique protein                                            |
| 105556 | 3.59  | 0.01 | 4.13  | 0.23 | 5.67  | 0.14 | 1.445 up    | 4.205 up   | 0.00 | 157.22 | unique protein                                            |
| 105597 | 11.82 | 0.04 | 11.96 | 0.12 | 10.43 | 0.26 | 1.101 up    | 2.615 down | 0.00 | 50.62  | unique protein                                            |
| 105643 | 12.01 | 0.07 | 11.83 | 0.01 | 10.59 | 0.20 | 1.135 down  | 2.688 down | 0.00 | 70.93  | myb transcriptional regulator                             |
| 105652 | 3.74  | 0.15 | 4.09  | 0.06 | 5.51  | 0.06 | 1.273 up    | 3.408 up   | 0.00 | 339.50 | unknown protein                                           |
| 105676 | 8.69  | 0.02 | 9.86  | 0.11 | 9.89  | 0.18 | 2.252 up    | 2.303 up   | 0.00 | 50.14  | DNA replication licensing factor mcm7                     |
| 105707 | 2.78  | 0.54 | 2.88  | 0.38 | 4.44  | 0.20 | 1.072 up    | 3.169 up   | 0.01 | 23.67  | unknown protein                                           |
| 105718 | 11.10 | 0.22 | 10.12 | 0.09 | 8.21  | 0.29 | 1.979 down  | 7.431 down | 0.00 | 104.61 | unknown protein                                           |
| 105722 | 10.76 | 0.00 | 6.64  | 0.22 | 8.75  | 0.51 | 17.360 down | 4.027 down | 0.00 | 51.85  | unique protein                                            |
| 105729 | 3.13  | 0.38 | 3.15  | 0.31 | 4.60  | 0.06 | 1.012 up    | 2.767 up   | 0.00 | 41.75  | unknown protein                                           |
| 105752 | 2.80  | 0.14 | 2.82  | 0.04 | 6.30  | 1.06 | 1.018 up    | 11.330 up  | 0.01 | 18.05  | C4-dicarboxylate transporter/malic acid transport protein |
| 105763 | 10.20 | 0.24 | 10.93 | 0.14 | 8.12  | 0.26 | 1.649 up    | 4.233 down | 0.00 | 114.04 | HFBs                                                      |
| 105765 | 11.39 | 0.11 | 11.41 | 0.13 | 9.36  | 0.36 | 1.009 up    | 4.102 down | 0.00 | 51.05  | unknown protein                                           |

|        |       |      |       |      |       |      |             |            |      |        |                                                                                   |
|--------|-------|------|-------|------|-------|------|-------------|------------|------|--------|-----------------------------------------------------------------------------------|
| 105768 | 4.61  | 0.12 | 4.54  | 0.18 | 5.67  | 0.08 | 1.049 down  | 2.085 up   | 0.00 | 88.18  | Cytochrome P450                                                                   |
| 105775 | 9.52  | 0.10 | 8.18  | 0.05 | 8.39  | 0.39 | 2.536 down  | 2.195 down | 0.02 | 11.84  | unknown protein                                                                   |
| 105784 | 8.10  | 0.13 | 7.24  | 0.19 | 6.61  | 0.27 | 1.815 down  | 2.811 down | 0.01 | 28.15  | Zn2Cys6 transcriptional regulator                                                 |
| 105785 | 4.58  | 0.09 | 5.09  | 0.04 | 6.72  | 0.19 | 1.423 up    | 4.402 up   | 0.00 | 151.49 | unknown protein                                                                   |
| 105798 | 4.02  | 0.15 | 4.18  | 0.38 | 5.43  | 0.10 | 1.120 up    | 2.659 up   | 0.00 | 46.35  | MFS permease                                                                      |
| 105804 | 3.59  | 0.31 | 3.33  | 0.43 | 5.34  | 0.20 | 1.193 down  | 3.352 up   | 0.00 | 44.52  | PKS                                                                               |
| 105805 | 3.32  | 0.07 | 3.67  | 0.42 | 5.53  | 0.17 | 1.272 up    | 4.632 up   | 0.00 | 78.10  | Zn2Cys6 transcriptional regulator                                                 |
| 105806 | 3.11  | 0.22 | 2.58  | 0.08 | 5.03  | 0.13 | 1.436 down  | 3.782 up   | 0.00 | 229.23 | unknown protein                                                                   |
| 105820 | 2.83  | 0.06 | 3.14  | 0.26 | 4.24  | 0.16 | 1.237 up    | 2.642 up   | 0.00 | 54.42  | unknown protein                                                                   |
| 105823 | 9.62  | 0.02 | 4.85  | 0.30 | 6.76  | 0.45 | 27.139 down | 7.263 down | 0.00 | 81.61  | FAD binding domain protein                                                        |
| 105832 | 12.66 | 0.10 | 12.18 | 0.10 | 11.38 | 0.23 | 1.403 down  | 2.434 down | 0.00 | 32.27  | phosphoribosylaminoimidazole carbounknown proteinlase                             |
| 105834 | 9.00  | 0.02 | 9.15  | 0.28 | 7.39  | 0.24 | 1.110 up    | 3.049 down | 0.00 | 56.63  | Zn2Cys6 transcriptional regulator                                                 |
| 105838 | 4.36  | 0.28 | 4.15  | 0.23 | 5.51  | 0.08 | 1.160 down  | 2.210 up   | 0.00 | 52.87  | glyoxalase                                                                        |
| 105840 | 9.19  | 0.00 | 5.93  | 0.11 | 10.24 | 0.33 | 9.559 down  | 2.071 up   | 0.00 | 187.59 | unknown protein. 2 TMs                                                            |
| 105849 | 9.65  | 0.05 | 9.14  | 0.13 | 7.46  | 0.21 | 1.424 down  | 4.587 down | 0.00 | 129.79 | Zn2Cys6 transcriptional regulator                                                 |
| 105851 | 7.73  | 0.00 | 7.43  | 0.17 | 6.49  | 0.48 | 1.232 down  | 2.375 down | 0.03 | 8.81   | GMC oxidoreductase family protein                                                 |
| 105863 | 10.84 | 0.07 | 11.32 | 0.14 | 9.63  | 0.09 | 1.395 up    | 2.300 down | 0.00 | 216.55 | unknown protein                                                                   |
| 105866 | 11.94 | 0.03 | 11.76 | 0.06 | 10.55 | 0.12 | 1.135 down  | 2.615 down | 0.00 | 177.20 | unique protein                                                                    |
| 105867 | 3.25  | 0.38 | 3.33  | 0.09 | 5.25  | 0.30 | 1.058 up    | 3.986 up   | 0.00 | 44.82  | unique protein                                                                    |
| 105869 | 5.76  | 0.03 | 6.38  | 0.17 | 7.64  | 0.27 | 1.536 up    | 3.676 up   | 0.00 | 52.64  | HFB6                                                                              |
| 105874 | 7.15  | 0.06 | 7.22  | 0.04 | 5.75  | 0.18 | 1.051 up    | 2.636 down | 0.00 | 105.88 | FAD binding domain-containing protein                                             |
| 105884 | 3.51  | 0.07 | 3.67  | 0.03 | 5.19  | 0.19 | 1.120 up    | 3.214 up   | 0.00 | 109.51 | short chain dehydrogenase/reductase                                               |
| 105888 | 5.67  | 0.03 | 6.55  | 0.30 | 7.75  | 0.30 | 1.847 up    | 4.222 up   | 0.00 | 42.05  | short chain dehydrogenase/reductase                                               |
| 105894 | 5.39  | 0.45 | 5.59  | 0.22 | 8.56  | 0.58 | 1.149 up    | 9.027 up   | 0.00 | 37.04  | unknown protein                                                                   |
| 105912 | 4.14  | 0.08 | 4.02  | 0.23 | 5.37  | 0.24 | 1.082 down  | 2.348 up   | 0.00 | 35.79  | unknown protein                                                                   |
| 105977 | 4.17  | 0.04 | 4.64  | 0.09 | 5.27  | 0.19 | 1.379 up    | 2.139 up   | 0.00 | 35.64  | unknown secreted protein. 3 TM                                                    |
| 105978 | 9.14  | 0.04 | 9.88  | 0.14 | 8.14  | 0.24 | 1.676 up    | 2.003 down | 0.00 | 57.74  | ARO8. Transcriptional regulators containing a DNA-binding HTH domain and an amino |
| 105983 | 3.44  | 0.09 | 3.56  | 0.39 | 4.87  | 0.11 | 1.085 up    | 2.706 up   | 0.00 | 48.02  | unknown protein                                                                   |
| 105989 | 4.03  | 0.11 | 5.44  | 0.29 | 5.40  | 0.17 | 2.653 up    | 2.578 up   | 0.00 | 40.65  | Zn2Cys6 transcriptional regulator                                                 |
| 106009 | 11.46 | 0.12 | 11.28 | 0.18 | 10.42 | 0.23 | 1.133 down  | 2.063 down | 0.01 | 23.03  | Zn2Cys6 transcriptional regulator                                                 |

|        |       |      |       |      |       |      |             |             |      |        |                                                                                   |
|--------|-------|------|-------|------|-------|------|-------------|-------------|------|--------|-----------------------------------------------------------------------------------|
| 106018 | 10.86 | 0.17 | 11.93 | 0.00 | 12.07 | 0.05 | 2.107 up    | 2.312 up    | 0.00 | 133.36 | unknown protein                                                                   |
| 106024 | 7.73  | 0.25 | 8.24  | 0.16 | 9.68  | 0.63 | 1.429 up    | 3.875 up    | 0.02 | 11.80  | unknown protein                                                                   |
| 106029 | 11.58 | 0.04 | 10.58 | 0.07 | 9.37  | 0.16 | 1.994 down  | 4.616 down  | 0.00 | 203.95 | MFS permease                                                                      |
| 106041 | 3.37  | 0.00 | 3.65  | 0.14 | 5.00  | 0.16 | 1.216 up    | 3.105 up    | 0.00 | 120.31 | unique protein                                                                    |
| 106043 | 10.09 | 0.06 | 8.15  | 0.07 | 8.00  | 0.25 | 3.842 down  | 4.265 down  | 0.00 | 79.56  | unknown protein. GFA-domain                                                       |
| 106067 | 9.56  | 0.72 | 8.94  | 0.11 | 11.16 | 0.22 | 1.540 down  | 3.028 up    | 0.01 | 28.11  | Chaperonin Cpn10                                                                  |
| 106082 | 11.93 | 0.00 | 11.49 | 0.06 | 10.44 | 0.15 | 1.358 down  | 2.813 down  | 0.00 | 126.56 | Epl1/Sm1                                                                          |
| 106089 | 8.48  | 0.01 | 7.61  | 0.14 | 6.13  | 0.18 | 1.823 down  | 5.089 down  | 0.00 | 169.85 | unique protein                                                                    |
| 106107 | 5.31  | 0.09 | 5.83  | 0.23 | 6.65  | 0.10 | 1.429 up    | 2.523 up    | 0.00 | 68.42  | unknown protein                                                                   |
| 106116 | 5.08  | 0.17 | 6.23  | 0.01 | 6.81  | 0.67 | 2.227 up    | 3.324 up    | 0.05 | 7.36   | unknown protein                                                                   |
| 106118 | 10.89 | 0.04 | 10.61 | 0.16 | 9.58  | 0.13 | 1.221 down  | 2.479 down  | 0.00 | 92.34  | Inorganic phosphate transporter                                                   |
| 106120 | 8.56  | 0.06 | 12.87 | 0.03 | 12.32 | 0.33 | 19.812 up   | 13.457 up   | 0.00 | 181.01 | esterase/lipase                                                                   |
| 106129 | 11.55 | 0.05 | 10.92 | 0.11 | 9.73  | 0.38 | 1.554 down  | 3.547 down  | 0.01 | 28.27  | unknown protein. only present in ascomycota                                       |
| 106130 | 13.95 | 0.02 | 13.52 | 0.08 | 12.44 | 0.12 | 1.346 down  | 2.843 down  | 0.00 | 187.86 | unknown protein                                                                   |
| 106138 | 8.36  | 0.00 | 7.30  | 0.01 | 6.61  | 0.32 | 2.081 down  | 3.340 down  | 0.00 | 32.81  | SNF2 family DNA-dependent ATPase                                                  |
| 106151 | 3.53  | 0.30 | 3.71  | 0.06 | 6.47  | 0.27 | 1.136 up    | 7.677 up    | 0.00 | 127.89 | unknown protein                                                                   |
| 106152 | 5.09  | 0.02 | 5.67  | 0.16 | 6.15  | 0.19 | 1.488 up    | 2.079 up    | 0.01 | 27.98  | unknown protein                                                                   |
| 106154 | 6.09  | 0.24 | 6.55  | 0.11 | 4.66  | 0.04 | 1.368 up    | 2.699 down  | 0.00 | 189.85 | unknown protein                                                                   |
| 106164 | 10.81 | 0.00 | 8.06  | 0.07 | 12.21 | 0.13 | 6.740 down  | 2.623 up    | 0.00 | 962.65 | short chain dehydrogenase/reductase                                               |
| 106168 | 4.76  | 0.12 | 5.17  | 0.04 | 6.53  | 0.33 | 1.325 up    | 3.414 up    | 0.00 | 37.64  | SSCRP                                                                             |
| 106171 | 10.23 | 0.14 | 8.73  | 0.26 | 11.92 | 1.06 | 2.821 down  | 3.232 up    | 0.03 | 10.31  | HET protein                                                                       |
| 106181 | 11.39 | 0.07 | 11.73 | 0.04 | 7.85  | 0.72 | 1.265 up    | 11.629 down | 0.00 | 44.19  | unique protein                                                                    |
| 106219 | 7.71  | 0.26 | 8.41  | 0.06 | 9.30  | 0.21 | 1.617 up    | 3.010 up    | 0.00 | 42.88  | unknown protein                                                                   |
| 106223 | 12.86 | 0.05 | 11.45 | 0.20 | 10.26 | 0.26 | 2.658 down  | 6.040 down  | 0.00 | 92.59  | unique protein                                                                    |
| 106234 | 12.55 | 0.08 | 11.75 | 0.16 | 11.53 | 0.18 | 1.739 down  | 2.030 down  | 0.01 | 28.00  | integral membrane protein comprising an SPX and an EXS domain. therefore most pro |
| 106242 | 9.79  | 0.12 | 9.28  | 0.11 | 8.52  | 0.19 | 1.424 down  | 2.404 down  | 0.00 | 43.38  | unique protein                                                                    |
| 106245 | 7.80  | 0.08 | 7.06  | 0.04 | 5.75  | 0.36 | 1.665 down  | 4.117 down  | 0.00 | 38.52  | catalase                                                                          |
| 106248 | 11.09 | 0.04 | 11.85 | 0.01 | 12.91 | 0.14 | 1.696 up    | 3.534 up    | 0.00 | 192.30 | monosaccharide transporter (galactose permease ?)                                 |
| 106267 | 4.25  | 0.03 | 4.36  | 0.24 | 5.85  | 0.21 | 1.081 up    | 3.031 up    | 0.00 | 61.55  | unique protein                                                                    |
| 106270 | 10.85 | 0.14 | 5.32  | 0.53 | 8.08  | 1.82 | 46.214 down | 6.817 down  | 0.05 | 7.44   | unknown protein                                                                   |

|        |       |      |       |      |       |      |            |            |      |         |                                                          |
|--------|-------|------|-------|------|-------|------|------------|------------|------|---------|----------------------------------------------------------|
| 106272 | 8.37  | 0.12 | 7.82  | 0.01 | 7.00  | 0.30 | 1.455 down | 2.574 down | 0.01 | 24.28   | PKS                                                      |
| 106276 | 12.71 | 0.11 | 12.59 | 0.06 | 11.06 | 0.20 | 1.087 down | 3.132 down | 0.00 | 93.44   | initiator tRNA phosphoribosyl transferase.               |
| 106297 | 10.92 | 0.07 | 11.40 | 0.02 | 9.89  | 0.26 | 1.393 up   | 2.036 down | 0.00 | 39.86   | Amino acid transporters                                  |
| 106314 | 8.84  | 0.01 | 9.22  | 0.03 | 6.11  | 0.20 | 1.306 up   | 6.595 down | 0.00 | 351.56  | Ankyrin                                                  |
| 106315 | 7.19  | 0.33 | 8.37  | 0.04 | 9.20  | 0.31 | 2.271 up   | 4.033 up   | 0.00 | 33.69   | serine protease                                          |
| 106356 | 12.26 | 0.12 | 11.94 | 0.05 | 11.12 | 0.33 | 1.240 down | 2.196 down | 0.01 | 14.88   | unknown protein                                          |
| 106371 | 6.69  | 0.10 | 3.58  | 0.04 | 5.47  | 0.06 | 8.617 down | 2.322 down | 0.00 | 1022.21 | SSCRIP                                                   |
| 106391 | 12.95 | 0.01 | 12.86 | 0.01 | 11.14 | 0.36 | 1.062 down | 3.506 down | 0.00 | 40.27   | unknown protein                                          |
| 106405 | 5.90  | 0.06 | 6.88  | 0.01 | 7.56  | 0.42 | 1.978 up   | 3.158 up   | 0.01 | 17.68   | extracellular lipase-like protein                        |
| 106437 | 11.06 | 0.11 | 10.62 | 0.15 | 9.69  | 0.24 | 1.356 down | 2.581 down | 0.00 | 34.56   | unknown protein                                          |
| 106445 | 5.01  | 0.40 | 4.84  | 0.38 | 7.67  | 0.40 | 1.126 down | 6.337 up   | 0.00 | 48.88   | unique protein                                           |
| 106452 | 11.33 | 0.21 | 9.63  | 0.00 | 9.12  | 0.25 | 3.258 down | 4.639 down | 0.00 | 74.10   | unknown protein                                          |
| 106453 | 6.35  | 0.59 | 6.53  | 0.57 | 8.25  | 0.59 | 1.138 up   | 3.756 up   | 0.03 | 9.80    | SSCRIP                                                   |
| 106470 | 2.42  | 0.11 | 2.36  | 0.22 | 3.61  | 0.14 | 1.047 down | 2.278 up   | 0.00 | 62.53   | unique protein                                           |
| 106479 | 2.63  | 0.15 | 2.84  | 0.27 | 4.45  | 0.10 | 1.156 up   | 3.527 up   | 0.00 | 118.28  | unknown protein                                          |
| 106480 | 4.55  | 0.06 | 5.77  | 0.29 | 7.32  | 0.74 | 2.327 up   | 6.820 up   | 0.01 | 15.66   | flavoprotein monooxygenases                              |
| 106486 | 2.87  | 0.02 | 2.98  | 0.14 | 4.67  | 0.05 | 1.074 up   | 3.471 up   | 0.00 | 545.63  | unique protein                                           |
| 106488 | 8.71  | 0.12 | 8.15  | 0.31 | 6.86  | 0.51 | 1.475 down | 3.615 down | 0.01 | 14.77   | unknown protein                                          |
| 106490 | 4.39  | 0.13 | 4.64  | 0.21 | 5.94  | 0.31 | 1.188 up   | 2.925 up   | 0.00 | 29.69   | unknown protein. 3 TM. only in Neurospora and Chaetomium |
| 106491 | 8.56  | 0.06 | 6.98  | 0.10 | 6.22  | 0.28 | 2.986 down | 5.048 down | 0.00 | 74.76   | unknown protein                                          |
| 106492 | 5.08  | 0.27 | 5.19  | 0.30 | 6.83  | 0.45 | 1.077 up   | 3.370 up   | 0.01 | 19.04   | SSCRIP                                                   |
| 106493 | 2.28  | 0.02 | 2.40  | 0.05 | 3.86  | 0.16 | 1.085 up   | 2.974 up   | 0.00 | 152.76  | unknown protein                                          |
| 106499 | 3.27  | 0.08 | 2.81  | 0.24 | 4.55  | 0.08 | 1.377 down | 2.433 up   | 0.00 | 141.90  | unknown protein                                          |
| 106538 | 9.51  | 0.02 | 12.40 | 0.21 | 12.85 | 0.42 | 7.440 up   | 10.140 up  | 0.00 | 67.85   | HFB4                                                     |
| 106556 | 7.18  | 0.20 | 6.64  | 0.04 | 8.85  | 0.90 | 1.458 down | 3.185 up   | 0.04 | 8.00    | unknown protein                                          |
| 106564 | 6.10  | 0.32 | 6.15  | 0.34 | 7.41  | 0.21 | 1.032 up   | 2.475 up   | 0.01 | 23.69   | unique protein                                           |
| 106583 | 2.60  | 0.02 | 2.44  | 0.10 | 4.29  | 0.04 | 1.121 down | 3.225 up   | 0.00 | 996.83  | unique protein                                           |
| 106604 | 6.83  | 0.55 | 6.96  | 0.16 | 8.33  | 0.41 | 1.092 up   | 2.819 up   | 0.02 | 12.55   | unique protein                                           |
| 106654 | 8.93  | 0.26 | 8.49  | 0.11 | 6.84  | 0.35 | 1.352 down | 4.265 down | 0.00 | 40.21   | Zn2Cys6 transcriptional regulator                        |
| 106657 | 11.17 | 0.24 | 10.54 | 0.00 | 9.79  | 0.10 | 1.546 down | 2.603 down | 0.00 | 74.92   | Zn2Cys6 transcriptional regulator                        |

|        |       |      |       |      |       |      |            |            |      |        |                                                  |
|--------|-------|------|-------|------|-------|------|------------|------------|------|--------|--------------------------------------------------|
| 106659 | 8.97  | 0.12 | 8.56  | 0.01 | 6.60  | 0.58 | 1.329 down | 5.170 down | 0.01 | 23.05  | unknown protein                                  |
| 106661 | 4.37  | 0.17 | 3.58  | 0.03 | 5.90  | 0.21 | 1.727 down | 2.889 up   | 0.00 | 118.76 | aspartyl protease                                |
| 106662 | 5.03  | 0.07 | 5.09  | 0.64 | 6.24  | 0.11 | 1.038 up   | 2.307 up   | 0.01 | 15.36  | SSCRP                                            |
| 106677 | 9.36  | 0.11 | 7.74  | 0.13 | 7.44  | 0.07 | 3.067 down | 3.773 down | 0.00 | 287.76 | Zn2Cys6 transcriptional regulator                |
| 106684 | 2.94  | 0.32 | 3.62  | 0.02 | 4.76  | 0.17 | 1.611 up   | 3.536 up   | 0.00 | 63.47  | unknown protein                                  |
| 106686 | 9.25  | 0.02 | 8.06  | 0.14 | 11.51 | 0.74 | 2.277 down | 4.800 up   | 0.01 | 26.98  | unknown protein                                  |
| 106695 | 10.79 | 0.12 | 7.71  | 0.18 | 9.37  | 0.10 | 8.454 down | 2.670 down | 0.00 | 311.43 | Sulfite oxidase. molybdopterin-binding component |
| 106697 | 7.14  | 0.15 | 6.03  | 0.13 | 5.51  | 0.43 | 2.150 down | 3.088 down | 0.01 | 14.93  | esterase/lipase. HGT                             |
| 106706 | 11.27 | 0.05 | 10.77 | 0.01 | 8.28  | 0.42 | 1.414 down | 7.936 down | 0.00 | 72.47  | Zn2Cys6 transcriptional regulator                |
| 106798 | 9.82  | 0.05 | 11.74 | 0.29 | 12.06 | 0.27 | 3.762 up   | 4.706 up   | 0.00 | 56.50  | GCN5-N-acetyltransferase                         |
| 106801 | 10.74 | 0.03 | 10.75 | 0.05 | 9.74  | 0.22 | 1.007 up   | 2.007 down | 0.00 | 34.47  | unknown protein                                  |
| 106812 | 2.68  | 0.18 | 2.82  | 0.03 | 4.99  | 0.27 | 1.106 up   | 4.957 up   | 0.00 | 97.91  | unique protein                                   |
| 106828 | 10.98 | 0.11 | 11.35 | 0.01 | 9.89  | 0.13 | 1.297 up   | 2.124 down | 0.00 | 136.12 | unknown protein                                  |
| 106869 | 4.56  | 0.06 | 5.35  | 0.22 | 6.38  | 0.50 | 1.737 up   | 3.537 up   | 0.01 | 14.82  | unknown protein                                  |
| 106897 | 4.65  | 0.01 | 5.10  | 0.19 | 5.90  | 0.31 | 1.367 up   | 2.386 up   | 0.01 | 17.74  | unique protein                                   |
| 106928 | 4.13  | 0.07 | 4.17  | 0.04 | 6.26  | 0.35 | 1.027 up   | 4.367 up   | 0.00 | 60.65  | Na/K ATPase alpha 1 subunit.                     |
| 106939 | 5.26  | 0.21 | 7.45  | 0.22 | 6.60  | 0.28 | 4.556 up   | 2.534 up   | 0.00 | 36.92  | protein kinase                                   |
| 106947 | 3.33  | 0.30 | 4.20  | 0.18 | 5.20  | 0.13 | 1.833 up   | 3.657 up   | 0.00 | 70.42  | unique protein                                   |
| 106958 | 11.60 | 0.12 | 11.76 | 0.09 | 10.14 | 0.25 | 1.115 up   | 2.764 down | 0.00 | 57.33  | unique protein                                   |
| 106960 | 3.53  | 0.51 | 3.38  | 0.29 | 5.62  | 0.28 | 1.109 down | 4.269 up   | 0.00 | 41.17  | unknown protein                                  |
| 106998 | 4.85  | 0.09 | 4.72  | 0.14 | 6.17  | 0.54 | 1.098 down | 2.488 up   | 0.02 | 10.78  | unknown protein                                  |
| 107002 | 10.27 | 0.01 | 9.74  | 0.07 | 8.48  | 0.18 | 1.448 down | 3.478 down | 0.00 | 124.97 | unknown protein                                  |
| 107003 | 8.80  | 0.08 | 7.99  | 0.06 | 10.86 | 0.59 | 1.757 down | 4.165 up   | 0.00 | 30.54  | unknown protein                                  |
| 107007 | 3.42  | 0.11 | 3.28  | 0.26 | 4.61  | 0.18 | 1.101 down | 2.283 up   | 0.00 | 44.89  | SSCRP                                            |
| 107008 | 2.95  | 0.12 | 3.23  | 0.14 | 5.25  | 0.08 | 1.208 up   | 4.930 up   | 0.00 | 448.46 | unknown protein                                  |
| 107031 | 8.06  | 0.13 | 7.73  | 0.17 | 9.41  | 0.48 | 1.255 down | 2.560 up   | 0.01 | 15.79  | unique protein                                   |
| 107037 | 10.10 | 0.11 | 11.49 | 0.15 | 12.07 | 0.42 | 2.634 up   | 3.940 up   | 0.01 | 22.97  | unknown protein                                  |
| 107042 | 6.99  | 0.12 | 8.06  | 0.08 | 8.07  | 0.37 | 2.094 up   | 2.118 up   | 0.03 | 10.08  | PTH11 GPCR                                       |
| 107055 | 11.41 | 0.05 | 10.75 | 0.02 | 8.69  | 0.51 | 1.572 down | 6.580 down | 0.00 | 37.76  | unknown protein                                  |
| 107070 | 2.78  | 0.08 | 2.73  | 0.06 | 4.19  | 0.06 | 1.036 down | 2.653 up   | 0.00 | 465.97 | unique protein                                   |



|        |       |      |       |      |       |      |            |             |      |         |                                                                                        |
|--------|-------|------|-------|------|-------|------|------------|-------------|------|---------|----------------------------------------------------------------------------------------|
| 107071 | 3.19  | 0.01 | 3.69  | 0.18 | 5.10  | 0.29 | 1.412 up   | 3.767 up    | 0.00 | 52.01   | HET-domain protein. unknown unknown                                                    |
| 107107 | 5.89  | 0.12 | 5.64  | 0.00 | 7.06  | 0.32 | 1.193 down | 2.243 up    | 0.01 | 26.35   | unknown protein                                                                        |
| 107111 | 11.88 | 0.10 | 11.55 | 0.12 | 10.26 | 0.14 | 1.258 down | 3.064 down  | 0.00 | 135.66  | unknown protein                                                                        |
| 107112 | 5.79  | 0.14 | 6.68  | 0.26 | 7.11  | 0.12 | 1.851 up   | 2.498 up    | 0.00 | 43.82   | unique protein                                                                         |
| 107123 | 8.55  | 0.08 | 9.49  | 0.05 | 9.72  | 0.13 | 1.913 up   | 2.239 up    | 0.00 | 76.03   | mitochondrial import inner membrane translocase subunit tim16                          |
| 107131 | 9.64  | 0.01 | 10.36 | 0.31 | 11.14 | 0.19 | 1.657 up   | 2.838 up    | 0.00 | 39.53   | unknown protein                                                                        |
| 107137 | 13.80 | 0.10 | 13.60 | 0.03 | 12.66 | 0.16 | 1.151 down | 2.205 down  | 0.00 | 65.25   | sterol desaturase family                                                               |
| 107142 | 4.26  | 0.05 | 5.25  | 0.25 | 5.70  | 0.16 | 1.980 up   | 2.709 up    | 0.00 | 48.62   | neutral protease 2                                                                     |
| 107146 | 9.24  | 0.11 | 9.25  | 0.10 | 10.48 | 0.45 | 1.009 up   | 2.363 up    | 0.02 | 12.33   | unknown protein                                                                        |
| 107194 | 3.92  | 0.30 | 4.96  | 0.23 | 5.50  | 0.24 | 2.057 up   | 2.995 up    | 0.01 | 26.73   | unique protein                                                                         |
| 107202 | 10.12 | 0.10 | 8.17  | 0.02 | 8.85  | 0.13 | 3.857 down | 2.407 down  | 0.00 | 161.99  | unknown protein                                                                        |
| 107207 | 4.91  | 0.07 | 5.33  | 0.10 | 6.09  | 0.09 | 1.338 up   | 2.270 up    | 0.00 | 130.08  | HMG box-containing protein                                                             |
| 107208 | 2.41  | 0.02 | 2.49  | 0.04 | 3.82  | 0.03 | 1.057 up   | 2.665 up    | 0.00 | 2343.52 | unique protein                                                                         |
| 107217 | 6.96  | 0.02 | 4.25  | 0.00 | 5.50  | 0.19 | 6.515 down | 2.752 down  | 0.00 | 166.57  | unknown protein                                                                        |
| 107239 | 9.94  | 0.05 | 11.34 | 0.14 | 11.05 | 0.13 | 2.637 up   | 2.160 up    | 0.00 | 76.09   | microtubule protein BIM1. possibly involved in mating. karyogamy or meiosis            |
| 107258 | 12.08 | 0.11 | 12.20 | 0.04 | 10.86 | 0.19 | 1.087 up   | 2.331 down  | 0.00 | 66.64   | 1-acyl-sn-glycerol-3-phosphate acyltransferase (Lysophosphatidic acid acyltransferase) |
| 107260 | 12.14 | 0.07 | 12.12 | 0.06 | 11.04 | 0.12 | 1.017 down | 2.150 down  | 0.00 | 119.87  | unknown protein                                                                        |
| 107268 | 12.06 | 0.12 | 11.68 | 0.04 | 10.96 | 0.09 | 1.302 down | 2.148 down  | 0.00 | 120.56  | Esterase/lipase/thioesterase                                                           |
| 107294 | 12.26 | 0.01 | 12.02 | 0.21 | 10.90 | 0.34 | 1.177 down | 2.568 down  | 0.01 | 20.22   | RTA1-like protein. 7 TM. responds to xenobiotic stimuli                                |
| 107297 | 10.92 | 0.10 | 9.33  | 0.12 | 7.45  | 0.17 | 3.011 down | 11.076 down | 0.00 | 368.20  | unique protein                                                                         |
| 107306 | 6.29  | 0.07 | 6.55  | 0.02 | 5.27  | 0.18 | 1.201 up   | 2.031 down  | 0.00 | 68.00   | unique protein                                                                         |
| 107329 | 4.80  | 0.15 | 4.36  | 0.54 | 6.80  | 0.22 | 1.361 down | 3.984 up    | 0.00 | 55.51   | methionine synthase                                                                    |
| 107340 | 14.37 | 0.03 | 13.30 | 0.11 | 11.84 | 0.48 | 2.102 down | 5.791 down  | 0.00 | 32.32   | unknown protein                                                                        |
| 107347 | 4.80  | 0.32 | 6.38  | 0.43 | 6.08  | 0.50 | 2.995 up   | 2.418 up    | 0.05 | 7.26    | SSCRP                                                                                  |
| 107349 | 3.43  | 0.11 | 3.75  | 0.04 | 4.75  | 0.21 | 1.248 up   | 2.496 up    | 0.00 | 47.81   | unknown protein                                                                        |
| 107358 | 5.33  | 0.13 | 5.12  | 0.30 | 6.48  | 0.22 | 1.150 down | 2.227 up    | 0.00 | 32.21   | unique protein                                                                         |
| 107369 | 12.41 | 0.10 | 10.99 | 0.08 | 10.70 | 0.16 | 2.688 down | 3.284 down  | 0.00 | 103.53  | guanine nucleotide exchange factor-like protein                                        |
| 107386 | 11.23 | 0.09 | 11.28 | 0.16 | 12.71 | 0.40 | 1.032 up   | 2.794 up    | 0.01 | 20.43   | unknown protein. only in Gibberella and Neurospora                                     |
| 107445 | 3.37  | 0.00 | 3.49  | 0.05 | 5.22  | 0.16 | 1.087 up   | 3.595 up    | 0.00 | 199.16  | unknown protein                                                                        |
| 107463 | 10.53 | 0.13 | 9.45  | 0.12 | 9.49  | 0.24 | 2.112 down | 2.059 down  | 0.01 | 20.27   | exoribonuclease Dhp1                                                                   |

|        |       |      |       |      |       |      |             |            |      |         |                                                          |
|--------|-------|------|-------|------|-------|------|-------------|------------|------|---------|----------------------------------------------------------|
| 107464 | 7.23  | 0.00 | 7.47  | 0.09 | 10.75 | 0.31 | 1.179 up    | 11.473 up  | 0.00 | 194.77  | unknown protein                                          |
| 107475 | 11.38 | 0.06 | 10.64 | 0.12 | 9.45  | 0.50 | 1.673 down  | 3.812 down | 0.01 | 17.32   | unknown protein                                          |
| 107483 | 9.31  | 0.13 | 9.36  | 0.04 | 7.83  | 0.14 | 1.037 up    | 2.775 down | 0.00 | 145.80  | unknown protein                                          |
| 107488 | 3.68  | 0.52 | 3.83  | 0.19 | 5.22  | 0.19 | 1.111 up    | 2.913 up   | 0.01 | 26.13   | unknown protein                                          |
| 107494 | 12.60 | 0.02 | 9.59  | 0.10 | 10.48 | 0.14 | 8.068 down  | 4.350 down | 0.00 | 371.71  | unique protein                                           |
| 107495 | 11.95 | 0.05 | 7.25  | 0.16 | 10.94 | 0.16 | 25.930 down | 2.009 down | 0.00 | 603.83  | unknown protein                                          |
| 107507 | 9.92  | 0.03 | 13.02 | 0.03 | 11.70 | 0.54 | 8.541 up    | 3.427 up   | 0.01 | 27.52   | unknown protein                                          |
| 107513 | 5.11  | 0.16 | 5.96  | 0.11 | 6.14  | 0.32 | 1.801 up    | 2.031 up   | 0.03 | 10.26   | unique protein                                           |
| 107524 | 9.58  | 0.03 | 9.51  | 0.02 | 8.08  | 0.33 | 1.048 down  | 2.835 down | 0.00 | 33.04   | unique protein                                           |
| 107526 | 5.17  | 0.11 | 5.15  | 0.48 | 6.39  | 0.11 | 1.014 down  | 2.315 up   | 0.01 | 26.89   | short chain dehydrogenase/reductase                      |
| 107554 | 11.58 | 0.02 | 10.72 | 0.06 | 10.56 | 0.03 | 1.815 down  | 2.036 down | 0.00 | 544.19  | glutathione transferase                                  |
| 107564 | 9.34  | 0.04 | 10.36 | 0.05 | 10.44 | 0.29 | 2.034 up    | 2.146 up   | 0.01 | 16.56   | Sin3-associated polypeptide Sap18                        |
| 107595 | 3.84  | 0.14 | 3.94  | 0.04 | 5.32  | 0.29 | 1.072 up    | 2.779 up   | 0.00 | 37.87   | unique protein                                           |
| 107601 | 11.55 | 0.24 | 11.33 | 0.09 | 12.74 | 0.34 | 1.169 down  | 2.275 up   | 0.01 | 20.73   | unknown Zn-finger protein. Tim10/DPP type                |
| 107639 | 11.41 | 0.03 | 9.20  | 0.10 | 9.93  | 0.10 | 4.604 down  | 2.784 down | 0.00 | 308.31  | unknown protein                                          |
| 107641 | 5.52  | 0.02 | 5.94  | 0.19 | 11.06 | 0.08 | 1.342 up    | 46.831 up  | 0.00 | 2546.06 | unique protein                                           |
| 107657 | 3.82  | 0.04 | 3.89  | 0.04 | 5.45  | 0.17 | 1.044 up    | 3.085 up   | 0.00 | 138.73  | unique protein                                           |
| 107669 | 10.70 | 0.08 | 10.57 | 0.06 | 9.10  | 0.30 | 1.094 down  | 3.048 down | 0.00 | 42.95   | Dipeptidyl aminopeptidase                                |
| 107670 | 10.98 | 0.02 | 10.99 | 0.13 | 8.80  | 0.21 | 1.009 up    | 4.515 down | 0.00 | 154.43  | unknown protein                                          |
| 107674 | 5.95  | 0.02 | 6.31  | 0.12 | 11.19 | 0.49 | 1.279 up    | 37.788 up  | 0.00 | 173.78  | unique protein                                           |
| 107685 | 5.31  | 0.33 | 5.53  | 0.42 | 6.81  | 0.41 | 1.171 up    | 2.829 up   | 0.02 | 12.56   | unique protein                                           |
| 107704 | 9.43  | 0.17 | 10.29 | 0.01 | 11.44 | 0.10 | 1.814 up    | 4.051 up   | 0.00 | 252.69  | unknown protein. only in A. fumigatus                    |
| 107717 | 3.27  | 0.21 | 3.26  | 0.02 | 5.12  | 0.28 | 1.004 down  | 3.605 up   | 0.00 | 61.26   | SSCRIP                                                   |
| 107742 | 5.14  | 0.07 | 5.81  | 0.23 | 6.18  | 0.17 | 1.583 up    | 2.044 up   | 0.01 | 23.78   | unique protein                                           |
| 107743 | 6.39  | 0.47 | 5.86  | 0.37 | 9.17  | 0.43 | 1.447 down  | 6.870 up   | 0.00 | 52.38   | unique protein                                           |
| 107811 | 4.88  | 0.09 | 4.34  | 0.31 | 6.04  | 0.14 | 1.458 down  | 2.235 up   | 0.00 | 70.12   | unknown protein                                          |
| 107814 | 3.07  | 0.13 | 3.65  | 0.03 | 4.67  | 0.14 | 1.489 up    | 3.026 up   | 0.00 | 129.78  | unknown protein                                          |
| 107835 | 6.99  | 0.20 | 7.56  | 0.25 | 10.42 | 0.23 | 1.480 up    | 10.793 up  | 0.00 | 194.17  | Arylacetamide deacetylase                                |
| 107843 | 4.75  | 0.03 | 5.22  | 0.04 | 6.24  | 0.14 | 1.380 up    | 2.810 up   | 0.00 | 143.78  | unique protein                                           |
| 107844 | 4.60  | 0.29 | 4.38  | 0.26 | 6.53  | 0.41 | 1.161 down  | 3.817 up   | 0.00 | 32.37   | unknown protein. 3 TM. only in Gibberella and Chaetomium |

|        |       |      |       |      |       |      |             |            |      |         |                                                                |
|--------|-------|------|-------|------|-------|------|-------------|------------|------|---------|----------------------------------------------------------------|
| 107846 | 3.18  | 0.09 | 3.52  | 0.07 | 4.92  | 0.12 | 1.262 up    | 3.339 up   | 0.00 | 231.90  | unknown protein                                                |
| 107848 | 9.85  | 0.08 | 11.61 | 0.23 | 11.92 | 0.42 | 3.382 up    | 4.186 up   | 0.01 | 25.48   | multicopper oxidase type 1. secreted                           |
| 107850 | 9.71  | 0.12 | 7.79  | 0.16 | 11.15 | 0.35 | 3.764 down  | 2.720 up   | 0.00 | 93.69   | CE1 poly(3-hydroxybutyrate) depolymerase                       |
| 107853 | 10.62 | 0.19 | 7.18  | 0.13 | 8.42  | 0.44 | 10.904 down | 4.618 down | 0.00 | 48.45   | unknown protein                                                |
| 107857 | 9.52  | 0.06 | 8.77  | 0.06 | 8.40  | 0.21 | 1.684 down  | 2.167 down | 0.00 | 30.75   | unknown protein                                                |
| 107867 | 4.28  | 0.20 | 4.15  | 0.07 | 6.08  | 0.27 | 1.095 down  | 3.495 up   | 0.00 | 68.25   | unique protein                                                 |
| 107868 | 2.71  | 0.38 | 2.44  | 0.07 | 3.93  | 0.05 | 1.211 down  | 2.333 up   | 0.00 | 59.72   | unknown protein                                                |
| 107869 | 5.12  | 0.13 | 3.59  | 0.11 | 6.35  | 0.20 | 2.888 down  | 2.341 up   | 0.00 | 178.26  | unknown protein                                                |
| 107871 | 13.11 | 0.04 | 13.06 | 0.06 | 11.30 | 0.22 | 1.034 down  | 3.499 down | 0.00 | 102.81  | unknown protein                                                |
| 107888 | 11.77 | 0.19 | 11.35 | 0.22 | 9.91  | 0.40 | 1.333 down  | 3.619 down | 0.01 | 24.63   | unknown protein                                                |
| 107896 | 6.60  | 0.22 | 7.04  | 0.01 | 8.03  | 0.39 | 1.353 up    | 2.696 up   | 0.01 | 15.68   | Isoflavone reductase                                           |
| 107914 | 9.63  | 0.10 | 9.37  | 0.10 | 7.58  | 0.19 | 1.197 down  | 4.142 down | 0.00 | 150.08  | unique protein                                                 |
| 107935 | 6.88  | 0.01 | 6.30  | 0.07 | 5.85  | 0.22 | 1.500 down  | 2.048 down | 0.01 | 23.64   | Nucleolar GTPase/ATPase p130                                   |
| 107938 | 10.43 | 0.07 | 10.19 | 0.01 | 9.33  | 0.18 | 1.175 down  | 2.139 down | 0.00 | 46.35   | esterase or lipase                                             |
| 107947 | 12.36 | 0.13 | 12.35 | 0.05 | 10.52 | 0.26 | 1.010 down  | 3.591 down | 0.00 | 75.29   | Acyl-CoA synthetase                                            |
| 107949 | 3.64  | 0.22 | 3.37  | 0.17 | 4.88  | 0.10 | 1.208 down  | 2.364 up   | 0.00 | 87.52   | unknown protein with ThiJ/Pfpl domain                          |
| 107961 | 5.57  | 0.24 | 5.45  | 0.29 | 7.18  | 0.35 | 1.088 down  | 3.059 up   | 0.01 | 27.76   | unique protein                                                 |
| 107974 | 4.73  | 0.37 | 4.83  | 0.45 | 7.11  | 0.43 | 1.077 up    | 5.221 up   | 0.00 | 30.65   | BZIP transcriptional regulator transcription factor JIbA/IDI-4 |
| 107998 | 3.07  | 0.27 | 3.05  | 0.10 | 4.92  | 0.23 | 1.017 down  | 3.595 up   | 0.00 | 70.63   | unique protein                                                 |
| 108007 | 3.83  | 0.15 | 3.92  | 0.18 | 5.21  | 0.09 | 1.070 up    | 2.616 up   | 0.00 | 110.97  | $\alpha/\beta$ hydrolase lipase                                |
| 108010 | 9.27  | 0.05 | 8.07  | 0.01 | 7.05  | 0.45 | 2.292 down  | 4.642 down | 0.01 | 27.72   | ABC transporter                                                |
| 108011 | 2.79  | 0.00 | 2.69  | 0.07 | 4.60  | 0.32 | 1.073 down  | 3.505 up   | 0.00 | 56.73   | unknown protein                                                |
| 108012 | 3.10  | 0.12 | 3.08  | 0.00 | 4.61  | 0.14 | 1.013 down  | 2.836 up   | 0.00 | 161.05  | serine peptidase S28                                           |
| 108013 | 4.28  | 0.23 | 3.91  | 0.10 | 5.85  | 0.09 | 1.292 down  | 2.980 up   | 0.00 | 177.36  | Zn2Cys6 transcriptional regulator                              |
| 108025 | 3.87  | 0.07 | 3.98  | 0.01 | 5.99  | 0.22 | 1.081 up    | 4.348 up   | 0.00 | 141.03  | unknown protein                                                |
| 108075 | 5.26  | 0.05 | 6.74  | 0.03 | 6.91  | 0.19 | 2.786 up    | 3.138 up   | 0.00 | 82.53   | unique protein                                                 |
| 108081 | 12.80 | 0.21 | 13.62 | 0.06 | 13.82 | 0.10 | 1.766 up    | 2.025 up   | 0.00 | 45.10   | kinetochore protein spc24. putative                            |
| 108143 | 6.13  | 0.07 | 11.03 | 0.06 | 12.41 | 0.12 | 29.783 up   | 77.549 up  | 0.00 | 2605.29 | unique protein                                                 |
| 108144 | 4.07  | 0.30 | 7.99  | 0.09 | 9.49  | 0.24 | 15.129 up   | 42.756 up  | 0.00 | 368.68  | unknown protein                                                |
| 108145 | 5.88  | 0.09 | 11.77 | 0.22 | 11.48 | 0.22 | 59.226 up   | 48.437 up  | 0.00 | 590.83  | unique protein                                                 |

|        |       |      |       |      |       |      |            |            |      |        |                                          |
|--------|-------|------|-------|------|-------|------|------------|------------|------|--------|------------------------------------------|
| 108155 | 7.78  | 0.44 | 7.98  | 0.30 | 9.93  | 0.79 | 1.148 up   | 4.428 up   | 0.03 | 9.71   | unknown protein. unique in fungi         |
| 108158 | 12.79 | 0.03 | 12.37 | 0.09 | 11.59 | 0.07 | 1.341 down | 2.295 down | 0.00 | 218.59 | unknown protein                          |
| 108185 | 4.12  | 0.23 | 4.27  | 0.21 | 6.09  | 0.25 | 1.108 up   | 3.932 up   | 0.00 | 62.49  | unknown protein. unique in fungi         |
| 108188 | 3.28  | 0.19 | 3.28  | 0.00 | 5.35  | 0.48 | 1.002 down | 4.188 up   | 0.00 | 29.87  | unique protein                           |
| 108201 | 12.53 | 0.14 | 12.04 | 0.07 | 10.60 | 0.14 | 1.405 down | 3.825 down | 0.00 | 177.30 | Unknown protein with reductase domain    |
| 108208 | 12.34 | 0.02 | 11.70 | 0.16 | 10.66 | 0.46 | 1.553 down | 3.192 down | 0.01 | 15.49  | unknown protein                          |
| 108233 | 7.69  | 0.01 | 8.07  | 0.00 | 5.71  | 0.71 | 1.293 up   | 3.966 down | 0.01 | 15.85  | unknown protein. secreted. only in fungi |
| 108251 | 2.69  | 0.06 | 2.87  | 0.06 | 4.33  | 0.06 | 1.130 up   | 3.113 up   | 0.00 | 649.20 | SSCRP                                    |
| 108261 | 10.97 | 0.12 | 13.23 | 0.05 | 12.84 | 0.11 | 4.792 up   | 3.644 up   | 0.00 | 310.19 | SSCRP                                    |
| 108263 | 11.91 | 0.07 | 11.88 | 0.11 | 10.75 | 0.27 | 1.021 down | 2.224 down | 0.01 | 27.03  | unknown protein                          |
| 108287 | 11.57 | 0.17 | 11.36 | 0.09 | 10.33 | 0.08 | 1.155 down | 2.372 down | 0.00 | 118.23 | unknown protein                          |
| 108333 | 9.27  | 0.32 | 8.98  | 0.05 | 7.77  | 0.24 | 1.223 down | 2.829 down | 0.00 | 34.40  | unknown protein                          |
| 108335 | 4.12  | 0.07 | 5.20  | 0.27 | 5.30  | 0.19 | 2.116 up   | 2.272 up   | 0.01 | 27.59  | unknown protein                          |
| 108339 | 6.47  | 0.39 | 6.89  | 0.27 | 8.22  | 0.35 | 1.337 up   | 3.360 up   | 0.01 | 20.42  | unique protein                           |
| 108340 | 7.64  | 0.02 | 6.75  | 0.06 | 10.08 | 0.19 | 1.860 down | 5.397 up   | 0.00 | 406.14 | unique protein                           |
| 108341 | 6.90  | 0.55 | 7.50  | 0.09 | 8.89  | 0.59 | 1.519 up   | 3.967 up   | 0.02 | 11.28  | unique protein                           |
| 108342 | 3.05  | 0.16 | 3.56  | 0.44 | 5.20  | 0.08 | 1.424 up   | 4.452 up   | 0.00 | 79.38  | unique protein                           |
| 108343 | 5.67  | 0.17 | 6.74  | 0.20 | 6.96  | 0.29 | 2.097 up   | 2.438 up   | 0.01 | 17.71  | unique protein                           |
| 108344 | 5.04  | 0.08 | 5.15  | 0.12 | 6.32  | 0.30 | 1.076 up   | 2.424 up   | 0.01 | 26.47  | unique protein                           |
| 108346 | 3.46  | 0.08 | 3.59  | 0.18 | 5.28  | 0.26 | 1.099 up   | 3.550 up   | 0.00 | 65.72  | GH18. chitinase CHI18-8                  |
| 108348 | 5.19  | 0.27 | 5.61  | 0.03 | 6.46  | 0.38 | 1.335 up   | 2.410 up   | 0.02 | 11.86  | unknown protein                          |
| 108367 | 4.60  | 0.47 | 5.13  | 0.15 | 8.15  | 0.67 | 1.444 up   | 11.732 up  | 0.00 | 34.53  | unique protein                           |
| 108383 | 3.63  | 0.37 | 4.05  | 0.28 | 5.68  | 0.38 | 1.339 up   | 4.132 up   | 0.01 | 27.20  | unique protein                           |
| 108384 | 4.80  | 0.30 | 5.15  | 0.32 | 7.85  | 1.07 | 1.269 up   | 8.260 up   | 0.02 | 11.47  | unique protein                           |
| 108412 | 2.33  | 0.02 | 2.30  | 0.16 | 3.67  | 0.09 | 1.023 down | 2.526 up   | 0.00 | 191.57 | SSCRP                                    |
| 108418 | 6.25  | 0.06 | 7.39  | 0.01 | 7.81  | 0.28 | 2.204 up   | 2.947 up   | 0.00 | 34.58  | SSCRP                                    |
| 108431 | 9.94  | 0.23 | 9.89  | 0.06 | 11.39 | 0.13 | 1.038 down | 2.735 up   | 0.00 | 103.00 | unknown protein                          |
| 108449 | 10.53 | 0.13 | 11.14 | 0.02 | 9.44  | 0.14 | 1.525 up   | 2.132 down | 0.00 | 134.86 | unknown protein                          |
| 108457 | 4.12  | 0.30 | 4.55  | 0.00 | 5.21  | 0.26 | 1.349 up   | 2.131 up   | 0.02 | 14.32  | unique protein                           |
| 108482 | 8.76  | 0.06 | 8.85  | 0.11 | 11.16 | 0.29 | 1.064 up   | 5.286 up   | 0.00 | 102.80 | fumarylacetoacetate hydrolase            |

|        |       |      |       |      |       |      |            |            |      |         |                                   |
|--------|-------|------|-------|------|-------|------|------------|------------|------|---------|-----------------------------------|
| 108542 | 10.56 | 0.07 | 11.56 | 0.21 | 11.80 | 0.19 | 2.003 up   | 2.357 up   | 0.00 | 32.11   | unknown protein                   |
| 108559 | 13.24 | 0.08 | 13.32 | 0.02 | 12.02 | 0.27 | 1.051 up   | 2.328 down | 0.00 | 34.99   | unknown protein                   |
| 108566 | 5.95  | 0.24 | 6.34  | 0.09 | 7.56  | 0.27 | 1.313 up   | 3.061 up   | 0.00 | 36.07   | unknown protein                   |
| 108585 | 6.82  | 0.10 | 6.41  | 0.16 | 11.23 | 0.73 | 1.330 down | 21.213 up  | 0.00 | 65.35   | unknown protein with CHAP domain  |
| 108586 | 8.03  | 0.06 | 10.60 | 0.04 | 13.34 | 0.33 | 5.954 up   | 39.802 up  | 0.00 | 296.23  | unknown protein                   |
| 108604 | 4.70  | 0.06 | 4.67  | 0.59 | 6.30  | 0.37 | 1.020 down | 3.048 up   | 0.01 | 17.22   | unique protein                    |
| 108605 | 7.11  | 0.06 | 7.84  | 0.12 | 8.67  | 0.21 | 1.661 up   | 2.953 up   | 0.00 | 54.22   | unique protein                    |
| 108635 | 6.16  | 0.11 | 6.94  | 0.25 | 7.59  | 0.12 | 1.715 up   | 2.706 up   | 0.00 | 57.99   | unknown protein                   |
| 108655 | 5.91  | 0.06 | 6.04  | 0.12 | 7.06  | 0.09 | 1.090 up   | 2.217 up   | 0.00 | 146.02  | unknown protein. secreted         |
| 108663 | 7.53  | 0.22 | 8.83  | 0.05 | 12.65 | 0.16 | 2.454 up   | 34.752 up  | 0.00 | 789.27  | SSCRP                             |
| 108665 | 4.19  | 0.21 | 3.89  | 0.06 | 5.22  | 0.33 | 1.229 down | 2.034 up   | 0.01 | 19.51   | unknown protein                   |
| 108681 | 4.07  | 0.21 | 4.23  | 0.30 | 5.90  | 0.20 | 1.117 up   | 3.541 up   | 0.00 | 61.22   | unknown protein                   |
| 108683 | 6.49  | 0.04 | 6.06  | 0.05 | 7.60  | 0.12 | 1.342 down | 2.152 up   | 0.00 | 192.75  | unknown protein. contains 5 TM    |
| 108686 | 9.02  | 0.01 | 7.62  | 0.17 | 6.79  | 0.32 | 2.650 down | 4.702 down | 0.00 | 49.70   | Aspartyl protease                 |
| 108721 | 3.11  | 0.14 | 3.03  | 0.09 | 6.78  | 1.12 | 1.053 down | 12.803 up  | 0.01 | 18.11   | unknown protein. unique in fungi  |
| 108749 | 10.60 | 0.05 | 10.57 | 0.05 | 13.86 | 0.09 | 1.017 down | 9.597 up   | 0.00 | 1792.15 | Copper transporter                |
| 108776 | 5.42  | 0.14 | 5.50  | 0.11 | 6.77  | 0.23 | 1.054 up   | 2.537 up   | 0.00 | 44.04   | GH55 $\beta$ -1.3-glucanase       |
| 108778 | 12.10 | 0.09 | 12.68 | 0.21 | 13.15 | 0.12 | 1.494 up   | 2.071 up   | 0.00 | 40.24   | unknown protein                   |
| 108802 | 5.40  | 0.43 | 7.23  | 0.16 | 6.47  | 0.50 | 3.568 up   | 2.104 up   | 0.03 | 8.78    | unique protein                    |
| 108806 | 13.41 | 0.26 | 13.31 | 0.20 | 12.04 | 0.12 | 1.073 down | 2.590 down | 0.00 | 60.39   | unknown protein                   |
| 108832 | 4.67  | 0.03 | 5.36  | 0.05 | 6.43  | 0.40 | 1.613 up   | 3.379 up   | 0.01 | 22.87   | unknown protein                   |
| 108866 | 8.15  | 0.03 | 9.44  | 0.08 | 9.99  | 0.19 | 2.443 up   | 3.576 up   | 0.00 | 93.55   | unknown protein                   |
| 108885 | 12.48 | 0.05 | 11.32 | 0.02 | 10.31 | 0.11 | 2.243 down | 4.499 down | 0.00 | 435.96  | amidase                           |
| 108893 | 10.09 | 0.02 | 8.02  | 0.18 | 8.29  | 0.21 | 4.190 down | 3.480 down | 0.00 | 80.26   | MFS permease                      |
| 108899 | 11.98 | 0.11 | 11.29 | 0.03 | 10.38 | 0.11 | 1.612 down | 3.030 down | 0.00 | 197.34  | unknown protein                   |
| 108914 | 11.09 | 0.02 | 10.39 | 0.00 | 13.20 | 0.73 | 1.630 down | 4.303 up   | 0.01 | 19.69   | methyltransferase type 11         |
| 108920 | 11.89 | 0.11 | 11.81 | 0.03 | 10.60 | 0.19 | 1.058 down | 2.443 down | 0.00 | 66.13   | zinc-binding dehydrogenase        |
| 108928 | 3.79  | 0.20 | 4.10  | 0.14 | 4.92  | 0.19 | 1.235 up   | 2.186 up   | 0.00 | 28.83   | unique protein                    |
| 108940 | 12.64 | 0.10 | 11.93 | 0.26 | 10.68 | 0.16 | 1.633 down | 3.881 down | 0.00 | 92.71   | Zn2Cys6 transcriptional regulator |
| 108953 | 7.04  | 0.05 | 7.98  | 0.00 | 8.23  | 0.32 | 1.913 up   | 2.273 up   | 0.01 | 15.58   | unknown protein                   |

|        |       |      |       |      |       |      |             |             |      |         |                                           |
|--------|-------|------|-------|------|-------|------|-------------|-------------|------|---------|-------------------------------------------|
| 108996 | 9.41  | 0.22 | 10.37 | 0.26 | 12.84 | 0.67 | 1.946 up    | 10.748 up   | 0.00 | 30.91   | unique protein                            |
| 109030 | 2.61  | 0.09 | 3.29  | 0.04 | 4.54  | 0.14 | 1.610 up    | 3.826 up    | 0.00 | 195.92  | unique protein                            |
| 109044 | 3.59  | 0.12 | 3.69  | 0.36 | 5.01  | 0.19 | 1.071 up    | 2.676 up    | 0.00 | 37.24   | unique protein                            |
| 109071 | 4.63  | 0.45 | 4.22  | 0.23 | 7.66  | 0.42 | 1.333 down  | 8.135 up    | 0.00 | 66.01   | unknown protein                           |
| 109075 | 5.85  | 0.19 | 5.96  | 0.08 | 7.07  | 0.54 | 1.076 up    | 2.320 up    | 0.04 | 7.50    | unknown protein                           |
| 109102 | 3.64  | 0.13 | 3.96  | 0.14 | 5.27  | 0.27 | 1.240 up    | 3.093 up    | 0.00 | 42.10   | unknown protein                           |
| 109122 | 10.96 | 0.15 | 9.07  | 0.13 | 9.78  | 0.09 | 3.690 down  | 2.256 down  | 0.00 | 142.60  | Amino acid transporters                   |
| 109146 | 9.87  | 0.10 | 5.49  | 0.08 | 4.27  | 0.07 | 20.774 down | 48.526 down | 0.00 | 3317.18 | PTH11 GPCR                                |
| 109147 | 2.36  | 0.22 | 2.37  | 0.18 | 3.66  | 0.06 | 1.004 up    | 2.450 up    | 0.00 | 90.13   | unknown protein                           |
| 109231 | 4.17  | 0.29 | 3.84  | 0.02 | 6.01  | 0.25 | 1.265 down  | 3.577 up    | 0.00 | 76.81   | SSCRP                                     |
| 109234 | 11.81 | 0.29 | 10.98 | 0.18 | 12.95 | 0.33 | 1.780 down  | 2.210 up    | 0.00 | 30.69   | D-aminopeptidase                          |
| 109237 | 4.75  | 0.40 | 4.77  | 0.12 | 6.45  | 0.25 | 1.014 up    | 3.251 up    | 0.00 | 40.54   | Cytochrome P450                           |
| 109239 | 3.60  | 0.42 | 3.18  | 0.39 | 5.80  | 0.53 | 1.331 down  | 4.596 up    | 0.01 | 24.74   | unknown protein. only in Aspergilli       |
| 109243 | 4.67  | 0.31 | 5.14  | 0.27 | 7.99  | 0.60 | 1.386 up    | 9.969 up    | 0.00 | 38.89   | unique protein                            |
| 109244 | 10.65 | 0.08 | 9.82  | 0.17 | 9.58  | 0.24 | 1.775 down  | 2.097 down  | 0.01 | 18.07   | unique protein                            |
| 109249 | 10.73 | 0.05 | 9.00  | 0.08 | 8.78  | 0.33 | 3.319 down  | 3.862 down  | 0.00 | 40.37   | unknown protein                           |
| 109255 | 6.96  | 0.00 | 6.56  | 0.02 | 8.07  | 0.57 | 1.311 down  | 2.170 up    | 0.03 | 9.21    | SSCRP                                     |
| 109264 | 3.44  | 0.45 | 3.93  | 0.01 | 4.61  | 0.19 | 1.409 up    | 2.256 up    | 0.01 | 16.10   | unique protein                            |
| 109267 | 5.75  | 0.25 | 6.81  | 0.08 | 6.83  | 0.37 | 2.083 up    | 2.106 up    | 0.03 | 9.11    | unique protein                            |
| 109278 | 7.01  | 0.15 | 8.24  | 0.07 | 9.85  | 0.82 | 2.351 up    | 7.186 up    | 0.02 | 13.89   | GH24 lysozyme                             |
| 109284 | 4.41  | 0.23 | 4.47  | 0.05 | 6.74  | 0.08 | 1.044 up    | 5.045 up    | 0.00 | 350.93  | unknown protein                           |
| 109304 | 3.87  | 0.24 | 4.23  | 0.05 | 5.65  | 0.26 | 1.284 up    | 3.443 up    | 0.00 | 50.11   | unknown protein                           |
| 109305 | 4.03  | 0.58 | 4.23  | 0.43 | 6.06  | 0.20 | 1.144 up    | 4.070 up    | 0.00 | 29.21   | unique protein                            |
| 109307 | 9.01  | 0.08 | 7.80  | 0.18 | 7.62  | 0.44 | 2.326 down  | 2.633 down  | 0.02 | 11.18   | unknown protein                           |
| 109319 | 5.26  | 0.22 | 5.58  | 0.10 | 7.79  | 0.22 | 1.253 up    | 5.783 up    | 0.00 | 136.60  | unknown protein                           |
| 109320 | 4.60  | 0.02 | 5.08  | 0.09 | 6.84  | 0.28 | 1.393 up    | 4.709 up    | 0.00 | 81.05   | unique protein                            |
| 109331 | 3.99  | 0.31 | 4.61  | 0.03 | 5.55  | 0.12 | 1.533 up    | 2.944 up    | 0.00 | 61.47   | unknown protein. secreted. 5 TM           |
| 109334 | 4.07  | 0.15 | 4.41  | 0.14 | 5.89  | 0.37 | 1.270 up    | 3.527 up    | 0.00 | 30.22   | unknown protein                           |
| 109335 | 4.63  | 0.01 | 6.04  | 0.09 | 6.06  | 0.24 | 2.651 up    | 2.695 up    | 0.00 | 40.87   | SSCRP                                     |
| 109338 | 3.88  | 0.12 | 3.47  | 0.43 | 5.40  | 0.08 | 1.325 down  | 2.868 up    | 0.00 | 68.86   | unknown protein. in A. oryzae and G. zeae |

|        |       |      |       |      |       |      |             |             |      |        |                                      |
|--------|-------|------|-------|------|-------|------|-------------|-------------|------|--------|--------------------------------------|
| 109341 | 7.81  | 0.07 | 6.31  | 0.11 | 6.63  | 0.15 | 2.831 down  | 2.260 down  | 0.00 | 78.13  | ankyrin                              |
| 109345 | 3.44  | 0.04 | 3.41  | 0.21 | 5.12  | 0.44 | 1.019 down  | 3.225 up    | 0.01 | 22.77  | unique protein                       |
| 109349 | 2.70  | 0.14 | 2.76  | 0.06 | 4.07  | 0.10 | 1.041 up    | 2.587 up    | 0.00 | 172.41 | short chain dehydrogenase/reductase  |
| 109351 | 2.75  | 0.04 | 3.06  | 0.04 | 4.64  | 0.19 | 1.237 up    | 3.722 up    | 0.00 | 136.67 | unique protein                       |
| 109353 | 3.78  | 0.09 | 4.55  | 0.16 | 5.49  | 0.12 | 1.696 up    | 3.270 up    | 0.00 | 139.14 | unknown protein                      |
| 109357 | 4.32  | 0.25 | 4.91  | 0.16 | 6.08  | 0.24 | 1.502 up    | 3.389 up    | 0.00 | 44.36  | short chain dehydrognease/reductase  |
| 109359 | 5.56  | 0.14 | 5.72  | 0.25 | 6.64  | 0.45 | 1.115 up    | 2.116 up    | 0.04 | 7.48   | unknown protein                      |
| 109361 | 4.51  | 0.14 | 6.27  | 0.15 | 5.92  | 0.17 | 3.399 up    | 2.671 up    | 0.00 | 69.42  | GT32 $\alpha$ -glycosyltransferase   |
| 109364 | 4.35  | 0.51 | 4.48  | 0.04 | 6.32  | 0.40 | 1.098 up    | 3.925 up    | 0.01 | 25.02  | unknown protein                      |
| 109367 | 9.99  | 0.02 | 4.94  | 0.10 | 6.36  | 0.56 | 33.158 down | 12.434 down | 0.00 | 74.15  | unique protein                       |
| 109370 | 3.19  | 0.27 | 3.42  | 0.00 | 4.72  | 0.12 | 1.169 up    | 2.885 up    | 0.00 | 90.48  | SSCRP                                |
| 109376 | 2.67  | 0.00 | 2.80  | 0.16 | 4.78  | 0.13 | 1.098 up    | 4.328 up    | 0.00 | 261.80 | glutamate decarbounknown proteinlase |
| 109379 | 12.45 | 0.04 | 10.85 | 0.12 | 10.79 | 0.26 | 3.043 down  | 3.165 down  | 0.00 | 46.07  | short chain dehydrogenase/reductase  |
| 109388 | 3.92  | 0.33 | 3.74  | 0.04 | 5.08  | 0.14 | 1.137 down  | 2.230 up    | 0.00 | 47.87  | unknown protein                      |
| 109392 | 5.34  | 0.21 | 6.06  | 0.10 | 7.85  | 0.54 | 1.649 up    | 5.707 up    | 0.01 | 26.05  | unknown protein                      |
| 109410 | 10.70 | 0.05 | 10.31 | 0.20 | 9.09  | 0.25 | 1.307 down  | 3.048 down  | 0.00 | 43.94  | unknown protein                      |
| 109415 | 3.21  | 0.13 | 3.39  | 0.10 | 5.66  | 0.48 | 1.134 up    | 5.453 up    | 0.00 | 38.36  | unknown protein                      |
| 109416 | 12.14 | 0.08 | 11.94 | 0.05 | 11.14 | 0.41 | 1.147 down  | 2.005 down  | 0.04 | 8.14   | unknown protein                      |
| 109435 | 9.96  | 0.00 | 10.61 | 0.07 | 11.23 | 0.13 | 1.562 up    | 2.412 up    | 0.00 | 96.21  | unknown protein. 1 TM                |
| 109475 | 4.68  | 0.07 | 4.87  | 0.04 | 6.85  | 0.47 | 1.147 up    | 4.516 up    | 0.00 | 32.23  | unique protein                       |
| 109486 | 9.07  | 0.09 | 9.49  | 0.08 | 8.04  | 0.52 | 1.343 up    | 2.030 down  | 0.03 | 9.64   | unique protein                       |
| 109489 | 3.88  | 0.31 | 4.14  | 0.10 | 5.48  | 0.30 | 1.200 up    | 3.025 up    | 0.00 | 29.73  | unknown protein                      |
| 109526 | 8.28  | 0.07 | 2.60  | 0.26 | 9.46  | 0.28 | 51.119 down | 2.258 up    | 0.00 | 525.54 | SNF2 family helicase/ATPase          |
| 109538 | 12.62 | 0.22 | 8.46  | 0.04 | 9.66  | 0.25 | 17.920 down | 7.807 down  | 0.00 | 197.72 | BZIP transcriptional regulator       |
| 109562 | 5.56  | 0.39 | 7.79  | 0.03 | 7.69  | 0.26 | 4.685 up    | 4.390 up    | 0.00 | 49.41  | unique protein                       |
| 109590 | 3.19  | 0.17 | 3.44  | 0.05 | 4.69  | 0.09 | 1.189 up    | 2.828 up    | 0.00 | 186.79 | unknown protein                      |
| 109607 | 2.27  | 0.17 | 2.19  | 0.04 | 3.58  | 0.04 | 1.056 down  | 2.491 up    | 0.00 | 261.83 | unique protein                       |
| 109608 | 3.13  | 0.13 | 3.33  | 0.10 | 4.72  | 0.19 | 1.148 up    | 3.013 up    | 0.00 | 85.18  | unique protein                       |
| 109668 | 5.00  | 0.11 | 4.82  | 0.03 | 6.60  | 0.36 | 1.135 down  | 3.029 up    | 0.00 | 35.17  | unique protein                       |
| 109677 | 10.46 | 0.11 | 10.96 | 0.20 | 8.52  | 0.25 | 1.422 up    | 3.833 down  | 0.00 | 102.97 | MFS permease                         |

|        |       |      |       |      |       |      |             |            |      |        |                                             |
|--------|-------|------|-------|------|-------|------|-------------|------------|------|--------|---------------------------------------------|
| 109721 | 7.52  | 0.19 | 7.82  | 0.02 | 8.62  | 0.15 | 1.234 up    | 2.147 up   | 0.00 | 46.43  | unknown protein                             |
| 109725 | 4.14  | 0.26 | 4.08  | 0.02 | 6.24  | 0.11 | 1.040 down  | 4.279 up   | 0.00 | 213.87 | unknown protein                             |
| 109726 | 4.53  | 0.07 | 5.37  | 0.06 | 5.54  | 0.19 | 1.795 up    | 2.016 up   | 0.00 | 30.87  | unique protein                              |
| 109748 | 12.04 | 0.01 | 11.35 | 0.18 | 9.99  | 0.35 | 1.616 down  | 4.129 down | 0.00 | 38.19  | Zn2Cys6 transcriptional regulator           |
| 109756 | 10.96 | 0.06 | 11.00 | 0.09 | 9.81  | 0.15 | 1.026 up    | 2.215 down | 0.00 | 81.77  | unknown protein                             |
| 109787 | 13.60 | 0.05 | 12.68 | 0.05 | 12.51 | 0.16 | 1.891 down  | 2.121 down | 0.00 | 47.32  | SSCRP                                       |
| 109790 | 11.91 | 0.05 | 12.12 | 0.19 | 12.99 | 0.21 | 1.158 up    | 2.102 up   | 0.01 | 27.08  | pyridoxamine 5'-phosphate oxidase           |
| 109801 | 6.34  | 0.33 | 5.77  | 0.22 | 8.73  | 0.31 | 1.490 down  | 5.221 up   | 0.00 | 81.05  | unknown protein                             |
| 109815 | 5.02  | 0.06 | 4.72  | 0.00 | 6.14  | 0.21 | 1.229 down  | 2.176 up   | 0.00 | 59.92  | unknown protein                             |
| 109835 | 10.61 | 0.04 | 10.87 | 0.04 | 8.57  | 0.17 | 1.204 up    | 4.092 down | 0.00 | 255.60 | unknown protein. thaumatin family           |
| 109837 | 4.07  | 0.21 | 4.55  | 0.85 | 5.93  | 0.12 | 1.391 up    | 3.619 up   | 0.01 | 16.77  | MFS permease                                |
| 109850 | 12.58 | 0.02 | 10.77 | 0.00 | 9.99  | 0.12 | 3.502 down  | 6.017 down | 0.00 | 550.87 | unknown protein                             |
| 109872 | 12.98 | 0.06 | 12.65 | 0.04 | 11.79 | 0.17 | 1.258 down  | 2.277 down | 0.00 | 57.97  | unknown protein                             |
| 109883 | 12.05 | 0.06 | 11.99 | 0.20 | 10.89 | 0.35 | 1.039 down  | 2.228 down | 0.01 | 15.63  | unknown protein                             |
| 109895 | 11.89 | 0.11 | 11.77 | 0.20 | 10.47 | 0.05 | 1.084 down  | 2.668 down | 0.00 | 150.37 | ATP-dependent Clp protease                  |
| 109908 | 5.18  | 0.06 | 5.14  | 0.01 | 6.59  | 0.22 | 1.024 down  | 2.665 up   | 0.00 | 70.37  | C2H2 transcriptional regulator              |
| 109910 | 5.26  | 0.11 | 5.25  | 0.17 | 6.61  | 0.29 | 1.006 down  | 2.551 up   | 0.00 | 32.21  | unique protein. secreted                    |
| 109911 | 3.93  | 0.18 | 4.17  | 0.12 | 6.27  | 0.54 | 1.179 up    | 5.082 up   | 0.01 | 27.13  | SSCRP                                       |
| 109925 | 12.11 | 0.02 | 6.26  | 0.43 | 10.15 | 0.60 | 57.532 down | 3.871 down | 0.00 | 70.89  | unknown protein                             |
| 109929 | 11.89 | 0.12 | 11.56 | 0.17 | 10.27 | 0.16 | 1.256 down  | 3.070 down | 0.00 | 89.64  | unknown protein                             |
| 109934 | 6.88  | 0.45 | 7.14  | 0.10 | 8.70  | 0.37 | 1.194 up    | 3.526 up   | 0.01 | 22.96  | unknown protein                             |
| 109943 | 3.07  | 0.03 | 3.05  | 0.03 | 4.75  | 0.10 | 1.015 down  | 3.202 up   | 0.00 | 460.78 | unknown protein                             |
| 109946 | 3.22  | 0.18 | 3.14  | 0.13 | 4.53  | 0.19 | 1.057 down  | 2.469 up   | 0.00 | 60.19  | unknown protein                             |
| 109949 | 5.83  | 0.20 | 5.65  | 0.23 | 7.88  | 0.42 | 1.132 down  | 4.140 up   | 0.00 | 37.51  | unknown protein                             |
| 109952 | 3.84  | 0.21 | 4.23  | 0.29 | 5.86  | 0.33 | 1.302 up    | 4.036 up   | 0.00 | 37.12  | unknown protein. containing ankyrin repeats |
| 109960 | 9.73  | 0.00 | 9.32  | 0.01 | 6.89  | 0.90 | 1.329 down  | 7.162 down | 0.02 | 14.60  | unknown protein in Sordariomycetes          |
| 109967 | 4.41  | 0.11 | 4.45  | 0.16 | 5.98  | 0.29 | 1.023 up    | 2.968 up   | 0.00 | 41.68  | unique protein. 4 TM                        |
| 109998 | 13.32 | 0.05 | 12.91 | 0.05 | 12.03 | 0.15 | 1.333 down  | 2.444 down | 0.00 | 90.40  | glutathione S-transferase                   |
| 110007 | 10.98 | 0.02 | 10.55 | 0.08 | 9.28  | 0.22 | 1.345 down  | 3.235 down | 0.00 | 73.32  | unique protein                              |
| 110025 | 5.20  | 0.21 | 5.87  | 0.08 | 7.34  | 0.14 | 1.590 up    | 4.411 up   | 0.00 | 157.65 | SSCRP                                       |



|        |       |      |       |      |       |      |             |            |      |        |                                             |
|--------|-------|------|-------|------|-------|------|-------------|------------|------|--------|---------------------------------------------|
| 110035 | 4.36  | 0.39 | 4.06  | 0.13 | 7.34  | 0.98 | 1.229 down  | 7.891 up   | 0.01 | 16.12  | unknown protein. in Sordariomycetes         |
| 110056 | 6.31  | 0.07 | 6.53  | 0.01 | 7.83  | 0.45 | 1.163 up    | 2.870 up   | 0.01 | 16.65  | unknown protein                             |
| 110058 | 4.66  | 0.16 | 4.93  | 0.21 | 5.93  | 0.16 | 1.211 up    | 2.413 up   | 0.00 | 45.36  | SSCRP                                       |
| 110078 | 6.74  | 0.24 | 6.49  | 0.25 | 8.69  | 0.57 | 1.188 down  | 3.866 up   | 0.01 | 19.59  | SSCRP                                       |
| 110096 | 8.03  | 0.15 | 8.75  | 0.19 | 9.31  | 0.37 | 1.655 up    | 2.439 up   | 0.02 | 12.17  | unknown protein                             |
| 110117 | 6.81  | 0.44 | 7.39  | 0.26 | 9.11  | 0.62 | 1.491 up    | 4.906 up   | 0.01 | 14.86  | SSCRP                                       |
| 110127 | 6.92  | 0.22 | 8.06  | 0.07 | 8.44  | 0.54 | 2.193 up    | 2.856 up   | 0.04 | 8.34   | unique protein                              |
| 110128 | 4.28  | 0.77 | 4.46  | 0.13 | 8.80  | 0.61 | 1.136 up    | 23.050 up  | 0.00 | 56.24  | unique protein                              |
| 110131 | 2.74  | 0.17 | 2.86  | 0.00 | 4.54  | 0.14 | 1.089 up    | 3.501 up   | 0.00 | 170.19 | unknown protein                             |
| 110133 | 11.52 | 0.12 | 11.06 | 0.08 | 10.32 | 0.14 | 1.377 down  | 2.299 down | 0.00 | 63.62  | Mitochondrial carrier protein               |
| 110151 | 4.59  | 0.06 | 5.24  | 0.21 | 10.46 | 0.22 | 1.560 up    | 58.240 up  | 0.00 | 814.50 | unique secreted protein                     |
| 110152 | 10.75 | 0.04 | 12.02 | 0.06 | 12.00 | 0.17 | 2.400 up    | 2.376 up   | 0.00 | 62.60  | BZIP transcriptional regulator              |
| 110153 | 3.08  | 0.12 | 3.41  | 0.01 | 4.53  | 0.11 | 1.254 up    | 2.726 up   | 0.00 | 171.26 | unique protein                              |
| 110173 | 6.96  | 0.08 | 9.37  | 0.16 | 8.29  | 0.27 | 5.323 up    | 2.512 up   | 0.00 | 60.04  | unknown protein                             |
| 110197 | 4.79  | 0.22 | 5.00  | 0.08 | 6.02  | 0.26 | 1.161 up    | 2.347 up   | 0.01 | 24.97  | unknown protein                             |
| 110207 | 3.11  | 0.07 | 3.36  | 0.06 | 5.24  | 0.25 | 1.186 up    | 4.385 up   | 0.00 | 105.06 | unique protein                              |
| 110224 | 3.69  | 0.12 | 3.72  | 0.12 | 5.90  | 0.26 | 1.019 up    | 4.625 up   | 0.00 | 103.99 | unknown protein                             |
| 110225 | 6.20  | 0.17 | 6.64  | 0.15 | 7.49  | 0.41 | 1.358 up    | 2.437 up   | 0.02 | 10.94  | unknown protein                             |
| 110259 | 3.42  | 0.12 | 3.43  | 0.18 | 4.78  | 0.12 | 1.004 up    | 2.553 up   | 0.00 | 107.31 | alginate lyases                             |
| 110261 | 10.49 | 0.19 | 8.66  | 0.16 | 11.81 | 0.25 | 3.567 down  | 2.491 up   | 0.00 | 132.52 | unique protein                              |
| 110262 | 9.63  | 0.07 | 8.65  | 0.01 | 7.98  | 0.13 | 1.965 down  | 3.144 down | 0.00 | 163.53 | Zinc-binding oxidoreductase                 |
| 110263 | 8.99  | 0.04 | 8.67  | 0.05 | 7.58  | 0.23 | 1.245 down  | 2.653 down | 0.00 | 51.50  | unknown protein                             |
| 110265 | 8.11  | 0.16 | 4.43  | 0.10 | 7.02  | 0.37 | 12.882 down | 2.138 down | 0.00 | 81.62  | unknown protein                             |
| 110276 | 6.95  | 0.18 | 7.61  | 0.01 | 5.87  | 0.53 | 1.577 up    | 2.120 down | 0.02 | 12.56  | isoflavone reductase                        |
| 110281 | 6.25  | 0.28 | 6.39  | 0.05 | 7.81  | 0.40 | 1.098 up    | 2.952 up   | 0.01 | 20.07  | unknown protein                             |
| 110295 | 9.88  | 0.18 | 10.34 | 0.14 | 11.73 | 0.37 | 1.372 up    | 3.610 up   | 0.00 | 30.44  | ribosomal protein S14                       |
| 110317 | 3.11  | 0.09 | 3.00  | 0.07 | 4.82  | 0.12 | 1.083 down  | 3.254 up   | 0.00 | 285.38 | GH18. chitinase CHI18-17                    |
| 110329 | 3.76  | 0.15 | 3.61  | 0.19 | 5.51  | 0.27 | 1.112 down  | 3.372 up   | 0.00 | 61.29  | unknown protein. only present in ascomycota |
| 110337 | 4.89  | 0.05 | 5.04  | 0.47 | 6.53  | 0.46 | 1.111 up    | 3.133 up   | 0.02 | 14.18  | unknown protein with thij/pfpi domain       |
| 110343 | 2.89  | 0.13 | 3.23  | 0.01 | 5.09  | 0.35 | 1.257 up    | 4.573 up   | 0.00 | 54.07  | unique protein                              |

|        |       |      |       |      |       |      |            |            |      |        |                                                              |
|--------|-------|------|-------|------|-------|------|------------|------------|------|--------|--------------------------------------------------------------|
| 110345 | 4.53  | 0.05 | 4.74  | 0.07 | 5.65  | 0.17 | 1.156 up   | 2.179 up   | 0.00 | 57.77  | unique protein                                               |
| 110363 | 5.58  | 0.10 | 6.92  | 0.12 | 8.76  | 0.21 | 2.528 up   | 9.052 up   | 0.00 | 230.09 | unique protein                                               |
| 110366 | 9.35  | 0.04 | 8.65  | 0.09 | 7.54  | 0.28 | 1.620 down | 3.498 down | 0.00 | 46.95  | unique protein                                               |
| 110396 | 11.49 | 0.03 | 11.34 | 0.16 | 13.17 | 0.22 | 1.116 down | 3.199 up   | 0.00 | 88.22  | unknown protein with Tim10/DDP family zinc finger            |
| 110403 | 8.85  | 0.00 | 8.93  | 0.26 | 7.67  | 0.37 | 1.058 up   | 2.273 down | 0.01 | 15.58  | unknown protein                                              |
| 110414 | 13.22 | 0.05 | 12.37 | 0.08 | 11.27 | 0.31 | 1.803 down | 3.884 down | 0.00 | 44.33  | Aminotran_Aminotransferase class-III                         |
| 110415 | 11.32 | 0.01 | 10.91 | 0.12 | 10.23 | 0.10 | 1.328 down | 2.131 down | 0.00 | 102.24 | Serine/threonine protein kinase                              |
| 110430 | 11.59 | 0.05 | 11.04 | 0.13 | 10.17 | 0.23 | 1.466 down | 2.673 down | 0.00 | 42.64  | MFS permease                                                 |
| 110433 | 2.40  | 0.10 | 2.59  | 0.11 | 3.92  | 0.10 | 1.141 up   | 2.874 up   | 0.00 | 204.88 | unique protein                                               |
| 110440 | 9.72  | 0.13 | 8.62  | 0.02 | 7.46  | 0.09 | 2.145 down | 4.792 down | 0.00 | 446.17 | unique protein                                               |
| 110455 | 8.68  | 0.09 | 8.21  | 0.16 | 6.06  | 0.53 | 1.381 down | 6.166 down | 0.00 | 33.03  | short chain dehydrogenase/reductase                          |
| 110457 | 6.36  | 0.21 | 6.19  | 0.09 | 7.94  | 0.37 | 1.125 down | 2.982 up   | 0.00 | 29.54  | SSCRP                                                        |
| 110471 | 12.46 | 0.14 | 12.09 | 0.09 | 10.29 | 0.26 | 1.289 down | 4.504 down | 0.00 | 84.38  | Cu <sup>2+</sup> /Zn <sup>2+</sup> superoxide dismutase SOD1 |
| 110490 | 6.52  | 0.16 | 7.31  | 0.12 | 7.75  | 0.26 | 1.721 up   | 2.343 up   | 0.01 | 20.93  | unknown protein                                              |
| 110569 | 6.00  | 0.40 | 6.23  | 0.18 | 7.36  | 0.15 | 1.168 up   | 2.568 up   | 0.00 | 31.05  | SSCRP                                                        |
| 110595 | 11.60 | 0.06 | 10.68 | 0.21 | 8.95  | 0.52 | 1.896 down | 6.313 down | 0.00 | 30.75  | unknown protein                                              |
| 110600 | 9.36  | 0.11 | 10.06 | 0.09 | 10.37 | 0.08 | 1.629 up   | 2.023 up   | 0.00 | 86.96  | unknown protein                                              |
| 110615 | 11.24 | 0.11 | 10.59 | 0.23 | 10.21 | 0.38 | 1.573 down | 2.040 down | 0.05 | 6.99   | unknown protein                                              |
| 110638 | 12.85 | 0.13 | 12.92 | 0.07 | 11.69 | 0.12 | 1.045 up   | 2.235 down | 0.00 | 110.36 | mitochondrial carrier protein                                |
| 110660 | 6.30  | 0.04 | 5.61  | 0.06 | 7.33  | 0.64 | 1.611 down | 2.045 up   | 0.04 | 8.69   | unknown protein                                              |
| 110663 | 4.80  | 0.26 | 5.60  | 0.26 | 6.38  | 0.21 | 1.743 up   | 3.007 up   | 0.00 | 32.23  | AMP-dependent synthetase and ligase. putative                |
| 110665 | 4.64  | 0.14 | 4.99  | 0.22 | 7.82  | 0.71 | 1.277 up   | 9.084 up   | 0.00 | 29.02  | unique protein                                               |
| 110666 | 4.02  | 0.18 | 3.42  | 0.33 | 8.15  | 0.80 | 1.512 down | 17.592 up  | 0.00 | 47.69  | ferric reductase                                             |
| 110684 | 3.59  | 0.09 | 3.89  | 0.42 | 5.25  | 0.40 | 1.232 up   | 3.155 up   | 0.01 | 17.18  | unique protein                                               |
| 110686 | 8.95  | 0.14 | 8.81  | 0.11 | 7.68  | 0.27 | 1.099 down | 2.404 down | 0.00 | 29.61  | unknown protein                                              |
| 110688 | 3.29  | 0.08 | 3.27  | 0.28 | 6.35  | 0.82 | 1.016 down | 8.358 up   | 0.01 | 22.52  | unique protein                                               |
| 110689 | 10.66 | 0.00 | 9.07  | 0.08 | 8.75  | 0.27 | 3.007 down | 3.777 down | 0.00 | 55.40  | Zn2Cys6 transcriptional regulator                            |
| 110691 | 5.68  | 0.16 | 5.70  | 0.02 | 7.58  | 0.30 | 1.009 up   | 3.730 up   | 0.00 | 60.28  | unique protein                                               |
| 110712 | 4.29  | 0.42 | 4.08  | 0.25 | 5.42  | 0.11 | 1.161 down | 2.177 up   | 0.01 | 27.98  | unique protein                                               |
| 110729 | 3.76  | 0.05 | 4.13  | 0.04 | 5.42  | 0.08 | 1.294 up   | 3.166 up   | 0.00 | 486.94 | unique protein                                               |

|        |       |      |       |      |       |      |             |            |      |        |                                                                                                       |
|--------|-------|------|-------|------|-------|------|-------------|------------|------|--------|-------------------------------------------------------------------------------------------------------|
| 110732 | 4.31  | 0.25 | 3.44  | 0.21 | 5.35  | 0.10 | 1.826 down  | 2.061 up   | 0.00 | 96.54  | unique protein                                                                                        |
| 110735 | 2.98  | 0.22 | 3.13  | 0.01 | 4.95  | 0.16 | 1.106 up    | 3.912 up   | 0.00 | 149.63 | unique protein                                                                                        |
| 110740 | 4.39  | 0.07 | 4.79  | 0.31 | 6.15  | 0.25 | 1.315 up    | 3.374 up   | 0.00 | 43.87  | unknown protein                                                                                       |
| 110749 | 3.67  | 0.11 | 3.54  | 0.04 | 4.68  | 0.13 | 1.088 down  | 2.018 up   | 0.00 | 88.44  | unknown protein                                                                                       |
| 110752 | 3.08  | 0.14 | 3.01  | 0.04 | 4.61  | 0.13 | 1.050 down  | 2.880 up   | 0.00 | 170.13 | unique protein                                                                                        |
| 110753 | 2.94  | 0.29 | 3.22  | 0.23 | 4.81  | 0.16 | 1.208 up    | 3.642 up   | 0.00 | 72.73  | Na <sup>+</sup> /proline symporter PutP                                                               |
| 110757 | 9.79  | 0.04 | 7.40  | 0.03 | 7.76  | 0.13 | 5.229 down  | 4.072 down | 0.00 | 341.34 | imidazole propionase-related amidohydrolase                                                           |
| 110762 | 3.24  | 0.19 | 5.30  | 0.11 | 4.59  | 0.40 | 4.159 up    | 2.539 up   | 0.01 | 21.17  | unknown protein                                                                                       |
| 110763 | 3.35  | 0.25 | 3.47  | 0.08 | 5.16  | 0.26 | 1.086 up    | 3.513 up   | 0.00 | 56.98  | unknown protein                                                                                       |
| 110767 | 10.66 | 0.09 | 9.06  | 0.12 | 9.20  | 0.16 | 3.035 down  | 2.745 down | 0.00 | 83.51  | unique protein                                                                                        |
| 110768 | 13.16 | 0.22 | 11.78 | 0.07 | 11.43 | 0.17 | 2.600 down  | 3.324 down | 0.00 | 75.87  | unknown protein                                                                                       |
| 110791 | 2.61  | 0.07 | 2.51  | 0.13 | 4.45  | 0.16 | 1.074 down  | 3.579 up   | 0.00 | 179.94 | unknown protein                                                                                       |
| 110797 | 5.21  | 0.06 | 4.26  | 0.28 | 7.13  | 0.30 | 1.931 down  | 3.776 up   | 0.00 | 88.78  | unknown protein. 1 TM. only in Gibberella                                                             |
| 110811 | 13.72 | 0.03 | 13.59 | 0.01 | 12.31 | 0.14 | 1.088 down  | 2.654 down | 0.00 | 143.60 | unknown protein                                                                                       |
| 110813 | 11.61 | 0.10 | 12.25 | 0.01 | 12.74 | 0.06 | 1.560 up    | 2.185 up   | 0.00 | 217.13 | Amino acid transporter LysP                                                                           |
| 110825 | 6.98  | 0.07 | 5.97  | 0.18 | 5.98  | 0.32 | 2.009 down  | 2.000 down | 0.02 | 10.77  | unique protein                                                                                        |
| 110831 | 9.34  | 0.05 | 9.07  | 0.04 | 8.10  | 0.35 | 1.207 down  | 2.371 down | 0.01 | 17.31  | unknown protein                                                                                       |
| 110848 | 3.32  | 0.16 | 3.45  | 0.16 | 5.57  | 0.52 | 1.096 up    | 4.761 up   | 0.01 | 27.31  | GH23 exo- $\beta$ -1.3-glucanase. distantly related                                                   |
| 110850 | 7.33  | 0.08 | 5.89  | 0.11 | 6.02  | 0.32 | 2.702 down  | 2.474 down | 0.01 | 21.30  | Zn2Cys6 transcriptional regulator                                                                     |
| 110855 | 5.72  | 0.36 | 8.21  | 0.14 | 4.68  | 0.15 | 5.605 up    | 2.058 down | 0.00 | 197.03 | unique protein                                                                                        |
| 110860 | 3.30  | 0.33 | 3.81  | 0.12 | 4.91  | 0.24 | 1.422 up    | 3.051 up   | 0.00 | 33.03  | Na <sup>+</sup> -independent Cl/HCO <sub>3</sub> exchanger AE1 and related transporters (SLC4 family) |
| 110866 | 12.04 | 0.02 | 11.71 | 0.21 | 9.75  | 0.09 | 1.254 down  | 4.888 down | 0.00 | 318.23 | metal-dependent amidase/aminoacylase/carbounknown proteinpeptidase                                    |
| 110868 | 4.98  | 0.07 | 4.40  | 0.29 | 6.23  | 0.46 | 1.491 down  | 2.392 up   | 0.01 | 17.93  | unknown protein                                                                                       |
| 110890 | 11.15 | 0.04 | 11.81 | 0.16 | 12.15 | 0.05 | 1.586 up    | 2.003 up   | 0.00 | 100.27 | porphobilinogen deaminase-like protein                                                                |
| 110891 | 10.04 | 0.18 | 6.19  | 0.20 | 8.36  | 0.43 | 14.392 down | 3.207 down | 0.00 | 59.30  | unique protein                                                                                        |
| 110894 | 7.01  | 0.12 | 6.23  | 0.11 | 9.29  | 0.91 | 1.711 down  | 4.867 up   | 0.01 | 14.92  | GH30 endo- $\beta$ -1 6-galactanase                                                                   |
| 110901 | 8.71  | 0.03 | 8.00  | 0.06 | 7.37  | 0.30 | 1.634 down  | 2.520 down | 0.01 | 21.87  | Zn2Cys6 transcriptional regulator                                                                     |
| 110902 | 6.72  | 0.44 | 6.98  | 0.56 | 8.70  | 0.47 | 1.201 up    | 3.948 up   | 0.01 | 14.66  | unique protein                                                                                        |
| 110966 | 3.00  | 0.42 | 3.31  | 0.11 | 5.05  | 0.14 | 1.240 up    | 4.159 up   | 0.00 | 73.12  | unknown protein                                                                                       |
| 111005 | 3.31  | 0.04 | 3.81  | 0.35 | 4.99  | 0.14 | 1.407 up    | 3.203 up   | 0.00 | 59.76  | unique protein                                                                                        |

|        |       |      |       |      |       |      |             |            |      |        |                                                                   |
|--------|-------|------|-------|------|-------|------|-------------|------------|------|--------|-------------------------------------------------------------------|
| 111012 | 7.76  | 0.50 | 7.79  | 0.23 | 9.71  | 0.80 | 1.020 up    | 3.849 up   | 0.04 | 8.30   | unique protein                                                    |
| 111027 | 6.00  | 0.26 | 6.68  | 0.08 | 8.43  | 0.17 | 1.596 up    | 5.366 up   | 0.00 | 144.57 | unknown protein                                                   |
| 111038 | 10.59 | 0.09 | 10.60 | 0.09 | 9.30  | 0.12 | 1.002 up    | 2.448 down | 0.00 | 139.33 | unique protein                                                    |
| 111048 | 5.33  | 0.29 | 5.54  | 0.08 | 6.38  | 0.11 | 1.155 up    | 2.059 up   | 0.00 | 35.58  | UbiA prenyltransferase. putative                                  |
| 111049 | 4.28  | 0.21 | 4.21  | 0.18 | 6.47  | 0.19 | 1.047 down  | 4.564 up   | 0.00 | 131.45 | cytochrome P450 protein. class IV                                 |
| 111050 | 7.98  | 0.12 | 8.28  | 0.01 | 6.90  | 0.25 | 1.228 up    | 2.126 down | 0.00 | 38.80  | unique protein                                                    |
| 111053 | 12.41 | 0.13 | 8.69  | 0.10 | 10.54 | 0.23 | 13.178 down | 3.633 down | 0.00 | 183.75 | retrograde regulation protein 2                                   |
| 111059 | 9.53  | 0.10 | 9.46  | 0.00 | 8.18  | 0.34 | 1.050 down  | 2.545 down | 0.01 | 23.87  | unknown protein                                                   |
| 111082 | 11.76 | 0.12 | 10.93 | 0.08 | 13.19 | 0.10 | 1.768 down  | 2.695 up   | 0.00 | 364.00 | glutathione S transferase. 2 TM                                   |
| 111093 | 4.25  | 0.12 | 3.80  | 0.37 | 6.00  | 0.20 | 1.361 down  | 3.370 up   | 0.00 | 73.09  | 3-beta hydroxysteroid dehydrogenase/isomerase. putative           |
| 111095 | 7.57  | 0.03 | 10.01 | 0.10 | 9.96  | 0.56 | 5.410 up    | 5.226 up   | 0.01 | 22.68  | unknown protein                                                   |
| 111108 | 3.90  | 0.07 | 3.88  | 0.01 | 5.86  | 0.19 | 1.011 down  | 3.895 up   | 0.00 | 177.71 | unknown protein                                                   |
| 111109 | 4.13  | 0.12 | 4.62  | 0.16 | 5.44  | 0.24 | 1.405 up    | 2.480 up   | 0.00 | 30.31  | unique protein                                                    |
| 111110 | 7.89  | 0.02 | 9.39  | 0.13 | 10.24 | 0.43 | 2.815 up    | 5.076 up   | 0.00 | 32.79  | SAM-dependent methyltransferases                                  |
| 111119 | 7.37  | 0.02 | 6.79  | 0.00 | 6.20  | 0.28 | 1.487 down  | 2.244 down | 0.01 | 20.03  | bZl) transcription factor. possibly related to AP1                |
| 111121 | 4.77  | 0.07 | 5.11  | 0.00 | 6.19  | 0.49 | 1.267 up    | 2.663 up   | 0.02 | 10.84  | metallopeptidase                                                  |
| 111124 | 9.66  | 0.04 | 9.78  | 0.02 | 8.26  | 0.30 | 1.089 up    | 2.641 down | 0.00 | 40.86  | unknown protein                                                   |
| 111129 | 13.52 | 0.01 | 13.39 | 0.11 | 12.10 | 0.26 | 1.091 down  | 2.666 down | 0.00 | 42.25  | unknown protein                                                   |
| 111135 | 11.96 | 0.08 | 10.78 | 0.21 | 10.25 | 0.12 | 2.277 down  | 3.293 down | 0.00 | 106.10 | unknown protein                                                   |
| 111138 | 10.06 | 0.07 | 9.40  | 0.26 | 8.49  | 0.24 | 1.573 down  | 2.970 down | 0.00 | 36.18  | unknown protein. secreted                                         |
| 111144 | 3.53  | 0.38 | 3.71  | 0.20 | 5.39  | 0.20 | 1.139 up    | 3.648 up   | 0.00 | 52.26  | unique protein                                                    |
| 111170 | 6.77  | 0.06 | 7.54  | 0.12 | 8.76  | 0.57 | 1.712 up    | 3.986 up   | 0.02 | 14.29  | unknown protein                                                   |
| 111171 | 3.10  | 0.08 | 3.47  | 0.03 | 4.97  | 0.12 | 1.288 up    | 3.651 up   | 0.00 | 276.74 | unique protein                                                    |
| 111192 | 10.46 | 0.11 | 10.31 | 0.15 | 11.59 | 0.11 | 1.110 down  | 2.199 up   | 0.00 | 99.58  | unknown protein                                                   |
| 111194 | 14.46 | 0.04 | 14.35 | 0.04 | 13.27 | 0.25 | 1.078 down  | 2.276 down | 0.00 | 33.36  | unknown protein                                                   |
| 111204 | 5.44  | 0.24 | 5.66  | 0.17 | 7.32  | 0.55 | 1.163 up    | 3.676 up   | 0.01 | 15.94  | unknown protein                                                   |
| 111205 | 7.76  | 0.24 | 8.22  | 0.06 | 9.35  | 0.45 | 1.381 up    | 3.027 up   | 0.01 | 14.93  | SSCRP                                                             |
| 111236 | 11.54 | 0.11 | 11.37 | 0.30 | 12.71 | 0.11 | 1.124 down  | 2.264 up   | 0.00 | 56.14  | N-acetyltransferase of bacterial origin                           |
| 111245 | 10.37 | 0.03 | 8.88  | 0.08 | 8.27  | 0.24 | 2.789 down  | 4.278 down | 0.00 | 79.09  | PL8 polysaccharide lyase; distantly related to chondroitin lyases |
| 111252 | 4.70  | 0.70 | 4.78  | 0.62 | 7.54  | 0.37 | 1.054 up    | 7.154 up   | 0.00 | 30.49  | unique protein                                                    |

|        |       |      |       |      |       |      |             |            |      |        |                                                        |
|--------|-------|------|-------|------|-------|------|-------------|------------|------|--------|--------------------------------------------------------|
| 111272 | 4.56  | 0.14 | 4.91  | 0.40 | 6.15  | 0.36 | 1.274 up    | 3.013 up   | 0.01 | 18.40  | unknown protein                                        |
| 111289 | 3.04  | 0.25 | 3.12  | 0.25 | 4.37  | 0.06 | 1.051 up    | 2.506 up   | 0.00 | 63.08  | unique protein                                         |
| 111304 | 9.31  | 0.17 | 7.60  | 0.12 | 7.04  | 0.19 | 3.260 down  | 4.816 down | 0.00 | 112.84 | unknown protein                                        |
| 111326 | 4.46  | 0.12 | 4.62  | 0.02 | 5.53  | 0.33 | 1.112 up    | 2.090 up   | 0.02 | 14.26  | unknown protein                                        |
| 111345 | 8.74  | 0.06 | 8.12  | 0.20 | 10.77 | 0.37 | 1.540 down  | 4.093 up   | 0.00 | 62.33  | unknown protein. Sordariomycetes. 1 TM                 |
| 111351 | 12.67 | 0.01 | 12.28 | 0.11 | 11.51 | 0.16 | 1.311 down  | 2.230 down | 0.00 | 55.13  | DHBP_synthase.-dihydroxy--butanone -phosphate synthase |
| 111357 | 12.79 | 0.04 | 12.25 | 0.03 | 10.55 | 0.15 | 1.449 down  | 4.725 down | 0.00 | 298.03 | FAD-dependent oxidoreductase                           |
| 111362 | 12.83 | 0.16 | 10.07 | 0.14 | 11.54 | 0.56 | 6.778 down  | 2.442 down | 0.01 | 19.41  | unknown protein                                        |
| 111372 | 5.73  | 0.40 | 6.56  | 0.12 | 7.11  | 0.18 | 1.779 up    | 2.619 up   | 0.01 | 23.35  | unique protein                                         |
| 111382 | 12.26 | 0.05 | 10.90 | 0.26 | 9.46  | 0.22 | 2.571 down  | 6.966 down | 0.00 | 130.67 | ankyrin                                                |
| 111393 | 2.80  | 0.24 | 2.83  | 0.14 | 5.04  | 0.18 | 1.019 up    | 4.733 up   | 0.00 | 138.09 | unique protein                                         |
| 111405 | 3.94  | 0.77 | 2.71  | 0.01 | 6.73  | 0.53 | 2.346 down  | 6.898 up   | 0.00 | 42.97  | unique protein                                         |
| 111442 | 10.76 | 0.09 | 7.60  | 0.06 | 7.76  | 0.23 | 8.953 down  | 8.042 down | 0.00 | 202.36 | Epl1/Sm1                                               |
| 111443 | 8.50  | 0.06 | 6.38  | 0.06 | 10.22 | 0.19 | 4.343 down  | 3.299 up   | 0.00 | 444.33 | unique protein                                         |
| 111446 | 12.13 | 0.08 | 12.11 | 0.03 | 9.66  | 0.46 | 1.017 down  | 5.552 down | 0.00 | 46.77  | Zn2Cys6 transcriptional regulator                      |
| 111449 | 2.35  | 0.02 | 2.50  | 0.13 | 3.82  | 0.10 | 1.113 up    | 2.773 up   | 0.00 | 216.42 | Epl1-like protein                                      |
| 111451 | 6.40  | 0.06 | 6.65  | 0.23 | 7.93  | 0.50 | 1.188 up    | 2.894 up   | 0.02 | 12.59  | peptidase S41                                          |
| 111465 | 2.96  | 0.33 | 5.62  | 0.50 | 4.85  | 0.25 | 6.317 up    | 3.691 up   | 0.00 | 34.88  | unique protein                                         |
| 111466 | 4.90  | 0.17 | 4.90  | 0.12 | 6.56  | 0.18 | 1.001 up    | 3.149 up   | 0.00 | 97.39  | Zn2Cys6 transcriptional regulator                      |
| 111476 | 10.24 | 0.03 | 9.74  | 0.05 | 8.63  | 0.11 | 1.416 down  | 3.062 down | 0.00 | 263.15 | unknown protein                                        |
| 111495 | 9.92  | 0.09 | 6.34  | 0.28 | 11.58 | 0.56 | 11.978 down | 3.161 up   | 0.00 | 90.27  | SSCRP                                                  |
| 111499 | 5.59  | 0.17 | 5.96  | 0.31 | 6.95  | 0.23 | 1.291 up    | 2.560 up   | 0.01 | 25.10  | MRSP1/expansin-like                                    |
| 111502 | 11.44 | 0.24 | 12.32 | 0.27 | 12.94 | 0.19 | 1.838 up    | 2.827 up   | 0.00 | 32.00  | NADH:ubiquinone oxidoreductase. NDUFB7/B18 subunit     |
| 111515 | 8.59  | 0.16 | 5.53  | 0.19 | 6.67  | 0.22 | 8.323 down  | 3.766 down | 0.00 | 116.51 | Zn2Cys6 transcriptional regulator                      |
| 111527 | 11.39 | 0.03 | 10.52 | 0.10 | 10.33 | 0.31 | 1.836 down  | 2.084 down | 0.02 | 13.25  | unique protein                                         |
| 111564 | 9.65  | 0.01 | 10.65 | 0.11 | 10.87 | 0.18 | 2.001 up    | 2.324 up   | 0.00 | 48.42  | D-tyrosyl-tRNA deacylase                               |
| 111566 | 8.25  | 0.08 | 4.45  | 0.02 | 7.15  | 0.26 | 13.910 down | 2.134 down | 0.00 | 183.82 | unique protein                                         |
| 111567 | 11.27 | 0.02 | 7.00  | 0.00 | 8.72  | 0.24 | 19.198 down | 5.836 down | 0.00 | 258.98 | C2H2 transcription factor                              |
| 111570 | 10.18 | 0.06 | 9.19  | 0.02 | 8.62  | 0.10 | 1.982 down  | 2.951 down | 0.00 | 220.01 | short chain dehydrogenase/reductase                    |
| 111584 | 3.80  | 0.07 | 3.99  | 0.25 | 5.22  | 0.11 | 1.145 up    | 2.679 up   | 0.00 | 83.23  | unknown protein                                        |

|        |       |      |       |      |       |      |            |            |      |         |                                                 |
|--------|-------|------|-------|------|-------|------|------------|------------|------|---------|-------------------------------------------------|
| 111591 | 8.86  | 0.10 | 8.55  | 0.20 | 6.76  | 0.43 | 1.242 down | 4.288 down | 0.00 | 31.12   | unknown protein                                 |
| 111593 | 3.12  | 0.34 | 3.22  | 0.02 | 5.24  | 0.11 | 1.069 up   | 4.337 up   | 0.00 | 141.78  | unique protein                                  |
| 111632 | 8.71  | 0.07 | 9.33  | 0.01 | 10.71 | 0.28 | 1.541 up   | 3.999 up   | 0.00 | 64.18   | unknown protein                                 |
| 111638 | 10.42 | 0.03 | 11.79 | 0.00 | 9.41  | 0.16 | 2.574 up   | 2.018 down | 0.00 | 239.32  | unknown protein                                 |
| 111645 | 4.89  | 0.25 | 5.95  | 0.13 | 6.21  | 0.14 | 2.085 up   | 2.497 up   | 0.00 | 43.65   | unique protein                                  |
| 111663 | 9.81  | 0.17 | 10.30 | 0.10 | 10.86 | 0.12 | 1.400 up   | 2.074 up   | 0.00 | 46.38   | unknown protein                                 |
| 111674 | 2.72  | 0.11 | 2.73  | 0.05 | 4.38  | 0.09 | 1.007 up   | 3.142 up   | 0.00 | 356.92  | unique protein                                  |
| 111682 | 8.86  | 0.18 | 8.00  | 0.07 | 7.78  | 0.12 | 1.813 down | 2.116 down | 0.00 | 49.24   | unknown protein                                 |
| 111729 | 3.08  | 0.11 | 3.15  | 0.12 | 4.40  | 0.07 | 1.049 up   | 2.506 up   | 0.00 | 212.13  | HFBs                                            |
| 111731 | 6.08  | 0.08 | 6.30  | 0.10 | 4.83  | 0.23 | 1.164 up   | 2.379 down | 0.00 | 54.77   | unique protein                                  |
| 111733 | 3.39  | 0.32 | 3.12  | 0.21 | 4.96  | 0.10 | 1.207 down | 2.955 up   | 0.00 | 80.91   | GH92 $\alpha$ -1.2-mannosidase                  |
| 111735 | 5.70  | 0.51 | 5.55  | 0.10 | 6.91  | 0.19 | 1.106 down | 2.314 up   | 0.01 | 22.54   | unique protein                                  |
| 111736 | 8.34  | 0.17 | 9.60  | 0.22 | 9.44  | 0.29 | 2.401 up   | 2.150 up   | 0.01 | 15.57   | unique protein                                  |
| 111750 | 10.50 | 0.01 | 10.85 | 0.06 | 14.86 | 0.08 | 1.277 up   | 20.527 up  | 0.00 | 3531.03 | ferric reductase                                |
| 111755 | 10.29 | 0.07 | 9.92  | 0.06 | 8.83  | 0.10 | 1.291 down | 2.742 down | 0.00 | 221.86  | transcriptional regulator. unknown              |
| 111758 | 9.61  | 0.08 | 9.06  | 0.11 | 10.91 | 0.39 | 1.464 down | 2.467 up   | 0.01 | 27.98   | unknown protein                                 |
| 111776 | 9.98  | 0.05 | 10.51 | 0.05 | 8.06  | 0.48 | 1.452 up   | 3.775 down | 0.00 | 35.58   | Zn2Cys6 transcriptional regulator               |
| 111778 | 7.80  | 0.06 | 10.81 | 0.05 | 8.96  | 0.36 | 8.063 up   | 2.238 up   | 0.00 | 59.93   | unknown protein                                 |
| 111788 | 11.50 | 0.09 | 10.82 | 0.07 | 10.41 | 0.06 | 1.608 down | 2.132 down | 0.00 | 169.70  | Synaptobrevin/VAMP-like protein (VAMP71 family) |
| 111807 | 6.56  | 0.26 | 7.78  | 0.14 | 5.39  | 0.41 | 2.321 up   | 2.247 down | 0.00 | 32.25   | unknown protein                                 |
| 111808 | 3.83  | 0.22 | 4.23  | 0.04 | 5.42  | 0.21 | 1.312 up   | 3.002 up   | 0.00 | 55.41   | unknown protein                                 |
| 111811 | 4.13  | 0.03 | 6.53  | 0.16 | 5.70  | 0.28 | 5.260 up   | 2.968 up   | 0.00 | 58.70   | unique protein                                  |
| 111827 | 3.82  | 0.03 | 3.77  | 0.04 | 4.92  | 0.18 | 1.035 down | 2.137 up   | 0.00 | 65.08   | unknown protein                                 |
| 111832 | 11.53 | 0.06 | 10.63 | 0.00 | 10.36 | 0.14 | 1.854 down | 2.241 down | 0.00 | 71.31   | Isoflavone reductase superfamily protein        |
| 111833 | 2.31  | 0.11 | 2.28  | 0.06 | 4.09  | 0.11 | 1.015 down | 3.442 up   | 0.00 | 297.59  | MFS permease                                    |
| 111838 | 8.80  | 0.18 | 8.15  | 0.12 | 6.74  | 0.32 | 1.572 down | 4.166 down | 0.00 | 44.24   | serin endopeptidase                             |
| 111849 | 9.08  | 0.03 | 7.99  | 0.15 | 10.12 | 0.08 | 2.121 down | 2.055 up   | 0.00 | 362.84  | GH30 endo- $\beta$ -1.4-xylanase XYN4           |
| 111858 | 3.64  | 0.14 | 3.54  | 0.10 | 5.42  | 0.10 | 1.078 down | 3.423 up   | 0.00 | 278.70  | methyltransferase                               |
| 111861 | 3.37  | 0.15 | 4.22  | 0.40 | 5.21  | 0.31 | 1.803 up   | 3.599 up   | 0.01 | 24.81   | PTH11 GPCR                                      |
| 111874 | 7.22  | 0.04 | 4.60  | 0.29 | 5.63  | 0.24 | 6.170 down | 3.012 down | 0.00 | 67.63   | swollenin 2                                     |

|        |       |      |       |      |       |      |             |             |      |        |                                                        |
|--------|-------|------|-------|------|-------|------|-------------|-------------|------|--------|--------------------------------------------------------|
| 111875 | 11.89 | 0.05 | 10.96 | 0.02 | 10.24 | 0.35 | 1.909 down  | 3.131 down  | 0.01 | 24.95  | unknown protein                                        |
| 111884 | 4.89  | 0.03 | 5.37  | 0.29 | 6.49  | 0.26 | 1.391 up    | 3.018 up    | 0.00 | 34.10  | unknown protein                                        |
| 111888 | 10.13 | 0.10 | 10.10 | 0.14 | 8.98  | 0.21 | 1.025 down  | 2.228 down  | 0.00 | 39.98  | MFS permease                                           |
| 111901 | 6.63  | 0.00 | 6.17  | 0.06 | 5.50  | 0.09 | 1.368 down  | 2.178 down  | 0.00 | 180.00 | unknown proteins                                       |
| 111915 | 10.02 | 0.20 | 13.43 | 0.08 | 13.79 | 0.23 | 10.684 up   | 13.684 up   | 0.00 | 250.57 | SSCRP                                                  |
| 111923 | 6.77  | 0.02 | 8.73  | 0.21 | 11.07 | 0.42 | 3.901 up    | 19.749 up   | 0.00 | 114.50 | unknown protein                                        |
| 111937 | 10.64 | 0.03 | 11.04 | 0.09 | 11.70 | 0.32 | 1.316 up    | 2.075 up    | 0.02 | 13.18  | unique protein                                         |
| 111948 | 5.81  | 0.30 | 5.37  | 0.33 | 7.14  | 0.32 | 1.356 down  | 2.520 up    | 0.01 | 25.21  | unique protein                                         |
| 111951 | 13.55 | 0.27 | 9.15  | 0.07 | 12.22 | 0.40 | 21.223 down | 2.518 down  | 0.00 | 95.89  | unique protein                                         |
| 111953 | 9.58  | 0.02 | 9.04  | 0.15 | 8.48  | 0.14 | 1.454 down  | 2.142 down  | 0.00 | 49.90  | GH47 $\alpha$ -1.2-mannosidase                         |
| 111955 | 8.19  | 0.10 | 7.53  | 0.12 | 9.58  | 0.63 | 1.589 down  | 2.613 up    | 0.02 | 13.23  | unknown protein. 1 TM                                  |
| 111956 | 3.59  | 0.33 | 3.61  | 0.12 | 4.98  | 0.37 | 1.014 up    | 2.628 up    | 0.01 | 17.72  | unknown protein                                        |
| 111958 | 3.71  | 0.02 | 3.87  | 0.00 | 5.47  | 0.23 | 1.111 up    | 3.370 up    | 0.00 | 85.79  | unknown protein                                        |
| 111966 | 4.11  | 0.13 | 3.86  | 0.19 | 6.06  | 0.11 | 1.186 down  | 3.869 up    | 0.00 | 241.15 | short chain dehydrogenase/reductase                    |
| 111968 | 9.32  | 0.16 | 9.30  | 0.04 | 5.66  | 0.61 | 1.011 down  | 12.623 down | 0.00 | 57.43  | unknown protein. only in ascomycetes                   |
| 112001 | 11.29 | 0.13 | 10.12 | 0.04 | 9.51  | 0.18 | 2.252 down  | 3.446 down  | 0.00 | 90.10  | unknown protein                                        |
| 112002 | 8.54  | 0.08 | 7.98  | 0.04 | 9.93  | 0.12 | 1.473 down  | 2.624 up    | 0.00 | 275.86 | SSCRP                                                  |
| 112028 | 2.97  | 0.13 | 3.47  | 0.11 | 5.19  | 0.12 | 1.416 up    | 4.666 up    | 0.00 | 276.85 | terpene synthase                                       |
| 112030 | 3.93  | 0.10 | 3.86  | 0.23 | 5.74  | 0.41 | 1.052 down  | 3.490 up    | 0.00 | 30.25  | unique protein                                         |
| 112034 | 2.98  | 0.06 | 2.92  | 0.24 | 4.59  | 0.15 | 1.036 down  | 3.052 up    | 0.00 | 106.76 | unknown protein                                        |
| 112037 | 3.28  | 0.00 | 3.36  | 0.16 | 5.03  | 0.06 | 1.059 up    | 3.377 up    | 0.00 | 402.53 | SSCRP                                                  |
| 112049 | 6.57  | 0.18 | 3.30  | 0.57 | 5.20  | 0.23 | 9.679 down  | 2.578 down  | 0.00 | 52.54  | unique protein                                         |
| 112055 | 3.33  | 0.43 | 3.42  | 0.16 | 4.50  | 0.12 | 1.064 up    | 2.249 up    | 0.01 | 24.94  | unique protein                                         |
| 112064 | 9.97  | 0.29 | 10.06 | 0.12 | 8.92  | 0.20 | 1.064 up    | 2.073 down  | 0.01 | 27.56  | unique protein                                         |
| 112080 | 9.62  | 0.04 | 9.86  | 0.14 | 8.44  | 0.08 | 1.180 up    | 2.264 down  | 0.00 | 216.08 | unknown protein                                        |
| 112081 | 12.34 | 0.23 | 11.55 | 0.07 | 10.27 | 0.18 | 1.738 down  | 4.201 down  | 0.00 | 99.15  | Methionine synthase. vitamin-B12 independent. putative |
| 112083 | 6.96  | 0.10 | 5.66  | 0.16 | 8.40  | 0.60 | 2.453 down  | 2.723 up    | 0.01 | 23.60  | HET protein                                            |
| 112086 | 3.65  | 0.14 | 5.00  | 0.35 | 6.04  | 0.16 | 2.542 up    | 5.252 up    | 0.00 | 87.50  | unknown protein                                        |
| 112094 | 8.35  | 0.05 | 7.61  | 0.02 | 6.88  | 0.23 | 1.676 down  | 2.767 down  | 0.00 | 44.70  | unique protein                                         |
| 112113 | 3.19  | 0.09 | 3.40  | 0.39 | 4.58  | 0.11 | 1.152 up    | 2.611 up    | 0.00 | 42.13  | unknown protein                                        |

|        |       |      |       |      |       |      |              |             |      |        |                                           |
|--------|-------|------|-------|------|-------|------|--------------|-------------|------|--------|-------------------------------------------|
| 112124 | 5.10  | 0.35 | 4.82  | 0.27 | 7.39  | 0.40 | 1.219 down   | 4.884 up    | 0.00 | 43.13  | HFBs                                      |
| 112125 | 10.30 | 0.11 | 8.50  | 0.08 | 8.58  | 0.43 | 3.475 down   | 3.278 down  | 0.01 | 19.58  | macrophomate synthase                     |
| 112126 | 12.76 | 0.00 | 12.29 | 0.09 | 11.62 | 0.01 | 1.388 down   | 2.204 down  | 0.00 | 486.22 | Methylmalonate semialdehyde dehydrogenase |
| 112129 | 4.67  | 0.11 | 5.00  | 0.61 | 5.71  | 0.13 | 1.254 up     | 2.060 up    | 0.03 | 9.43   | Zn2Cys6 transcriptional regulator         |
| 112133 | 2.98  | 0.12 | 3.07  | 0.14 | 5.09  | 0.24 | 1.064 up     | 4.317 up    | 0.00 | 102.06 | unknown protein                           |
| 112134 | 9.69  | 0.19 | 9.12  | 0.02 | 7.52  | 0.35 | 1.483 down   | 4.514 down  | 0.00 | 45.80  | Zn2Cys6 transcriptional regulator         |
| 112140 | 4.08  | 0.33 | 3.64  | 0.23 | 8.33  | 0.38 | 1.359 down   | 18.991 up   | 0.00 | 169.30 | GH28 exo-polygalacturonase PGX1           |
| 112163 | 7.40  | 0.07 | 6.74  | 0.16 | 8.85  | 0.19 | 1.586 down   | 2.729 up    | 0.00 | 126.20 | unknown protein in Sordariomycetes        |
| 112180 | 11.93 | 0.09 | 11.27 | 0.00 | 10.06 | 0.06 | 1.573 down   | 3.638 down  | 0.00 | 672.74 | unknown protein                           |
| 112193 | 12.23 | 0.12 | 12.27 | 0.10 | 10.93 | 0.51 | 1.031 up     | 2.465 down  | 0.02 | 11.03  | unknown protein                           |
| 112211 | 12.37 | 0.06 | 12.19 | 0.05 | 11.34 | 0.15 | 1.131 down   | 2.038 down  | 0.00 | 62.12  | exonuclease. putative                     |
| 112215 | 4.97  | 0.22 | 6.19  | 0.22 | 6.32  | 0.12 | 2.337 up     | 2.548 up    | 0.00 | 47.00  | unique protein                            |
| 112222 | 6.75  | 0.26 | 5.94  | 0.36 | 5.40  | 0.26 | 1.752 down   | 2.550 down  | 0.01 | 15.32  | unknown protein                           |
| 112232 | 3.95  | 0.31 | 4.91  | 0.28 | 5.20  | 0.29 | 1.944 up     | 2.375 up    | 0.02 | 12.47  | unique protein                            |
| 112238 | 3.19  | 0.18 | 3.38  | 0.05 | 4.60  | 0.09 | 1.142 up     | 2.660 up    | 0.00 | 151.97 | unique protein                            |
| 112239 | 13.14 | 0.07 | 5.45  | 0.08 | 6.68  | 0.25 | 206.465 down | 87.701 down | 0.00 | 888.55 | unknown protein                           |
| 112247 | 11.69 | 0.04 | 8.42  | 0.04 | 8.14  | 0.48 | 9.643 down   | 11.725 down | 0.00 | 64.34  | 3-isopropylmalate dehydrogenase           |
| 112255 | 2.50  | 0.04 | 2.78  | 0.15 | 4.02  | 0.08 | 1.219 up     | 2.863 up    | 0.00 | 231.25 | unique protein                            |
| 112267 | 11.17 | 0.15 | 10.28 | 0.08 | 9.55  | 0.32 | 1.846 down   | 3.066 down  | 0.01 | 26.34  | unknown protein                           |
| 112275 | 9.78  | 0.01 | 9.65  | 0.04 | 7.91  | 0.16 | 1.093 down   | 3.655 down  | 0.00 | 201.85 | unique protein                            |
| 112276 | 11.70 | 0.15 | 11.19 | 0.22 | 9.19  | 0.15 | 1.427 down   | 5.681 down  | 0.00 | 186.68 | unique protein                            |
| 112281 | 9.64  | 0.02 | 5.55  | 0.26 | 7.48  | 0.26 | 16.952 down  | 4.461 down  | 0.00 | 153.11 | unique protein                            |
| 112285 | 8.59  | 0.20 | 7.09  | 0.08 | 7.20  | 0.30 | 2.821 down   | 2.624 down  | 0.01 | 23.83  | unknown protein                           |
| 112288 | 5.03  | 0.06 | 4.84  | 0.16 | 6.85  | 0.42 | 1.141 down   | 3.536 up    | 0.00 | 33.14  | unknown protein                           |
| 112328 | 12.78 | 0.04 | 12.09 | 0.02 | 10.86 | 0.27 | 1.612 down   | 3.779 down  | 0.00 | 60.30  | peptidase M14                             |
| 112330 | 12.52 | 0.08 | 12.27 | 0.09 | 11.04 | 0.42 | 1.190 down   | 2.780 down  | 0.01 | 17.11  | transcriptional regulator. putative       |
| 112338 | 4.14  | 0.56 | 4.33  | 0.15 | 7.00  | 0.86 | 1.140 up     | 7.254 up    | 0.01 | 14.93  | unique protein                            |
| 112369 | 2.52  | 0.07 | 2.83  | 0.21 | 4.62  | 0.35 | 1.242 up     | 4.281 up    | 0.00 | 45.88  | unique protein                            |
| 112370 | 3.56  | 0.06 | 3.65  | 0.22 | 4.93  | 0.15 | 1.069 up     | 2.586 up    | 0.00 | 74.64  | unique protein                            |
| 112386 | 3.25  | 0.22 | 3.27  | 0.41 | 5.38  | 0.23 | 1.011 up     | 4.348 up    | 0.00 | 59.21  | unknown protein                           |



|        |       |      |       |      |       |      |            |            |      |        |                                           |
|--------|-------|------|-------|------|-------|------|------------|------------|------|--------|-------------------------------------------|
| 112387 | 4.89  | 0.28 | 4.43  | 0.30 | 6.19  | 0.57 | 1.376 down | 2.463 up   | 0.02 | 10.83  | unknown protein with WD repeats           |
| 112390 | 14.26 | 0.08 | 13.69 | 0.05 | 12.74 | 0.24 | 1.487 down | 2.876 down | 0.00 | 48.53  | unknown protein                           |
| 112392 | 4.90  | 0.08 | 4.95  | 0.22 | 6.93  | 0.37 | 1.037 up   | 4.085 up   | 0.00 | 43.65  | GH11 endo- $\beta$ -1.4-xylanase XYN5     |
| 112396 | 4.41  | 0.33 | 4.98  | 0.32 | 7.15  | 0.16 | 1.484 up   | 6.680 up   | 0.00 | 104.95 | unique secreted protein                   |
| 112398 | 8.75  | 0.22 | 7.77  | 0.02 | 7.14  | 0.17 | 1.968 down | 3.059 down | 0.00 | 65.58  | unique protein                            |
| 112400 | 10.88 | 0.11 | 10.43 | 0.18 | 9.66  | 0.18 | 1.362 down | 2.321 down | 0.00 | 38.43  | unique protein                            |
| 112401 | 11.01 | 0.04 | 10.72 | 0.23 | 9.46  | 0.24 | 1.224 down | 2.921 down | 0.00 | 45.13  | Zn2Cys6 transcriptional regulator         |
| 112427 | 2.29  | 0.12 | 2.40  | 0.03 | 3.95  | 0.09 | 1.075 up   | 3.158 up   | 0.00 | 319.84 | unique protein                            |
| 112439 | 14.58 | 0.08 | 13.73 | 0.05 | 12.04 | 0.20 | 1.813 down | 5.854 down | 0.00 | 188.11 | unknown protein                           |
| 112441 | 9.99  | 0.14 | 10.78 | 0.01 | 8.93  | 0.18 | 1.728 up   | 2.077 down | 0.00 | 101.71 | Vacuolar sorting protein Vps52            |
| 112459 | 7.67  | 0.13 | 7.43  | 0.28 | 6.10  | 0.48 | 1.180 down | 2.970 down | 0.02 | 13.73  | unique protein                            |
| 112477 | 4.05  | 0.45 | 4.35  | 0.13 | 5.81  | 0.36 | 1.228 up   | 3.370 up   | 0.01 | 21.45  | unknown protein                           |
| 112478 | 6.50  | 0.07 | 6.10  | 0.03 | 10.14 | 0.85 | 1.325 down | 12.441 up  | 0.00 | 34.31  | unknown protein. only in <i>A. oryzae</i> |
| 112490 | 7.17  | 0.22 | 6.82  | 0.14 | 5.71  | 0.39 | 1.276 down | 2.755 down | 0.01 | 16.31  | unknown protein                           |
| 112494 | 3.81  | 0.17 | 3.90  | 0.36 | 5.18  | 0.14 | 1.066 up   | 2.581 up   | 0.00 | 39.68  | unknown protein                           |
| 112496 | 9.60  | 0.06 | 10.00 | 0.15 | 7.73  | 0.22 | 1.319 up   | 3.655 down | 0.00 | 131.96 | heterocompatibility domain protein        |
| 112502 | 11.83 | 0.01 | 10.86 | 0.04 | 10.06 | 0.20 | 1.955 down | 3.398 down | 0.00 | 90.68  | unknown protein                           |
| 112514 | 6.13  | 0.40 | 6.65  | 0.08 | 7.33  | 0.20 | 1.440 up   | 2.308 up   | 0.01 | 17.69  | unique protein                            |
| 112518 | 3.54  | 0.12 | 3.73  | 0.42 | 5.68  | 0.18 | 1.138 up   | 4.409 up   | 0.00 | 72.78  | unique protein                            |
| 112519 | 10.33 | 0.08 | 9.99  | 0.13 | 8.90  | 0.32 | 1.264 down | 2.695 down | 0.01 | 24.53  | vacuolar endopolyphosphatase              |
| 112520 | 8.73  | 0.18 | 9.13  | 0.11 | 10.19 | 0.15 | 1.314 up   | 2.734 up   | 0.00 | 73.31  | unique protein                            |
| 112523 | 6.38  | 0.15 | 6.27  | 0.22 | 7.86  | 0.65 | 1.075 down | 2.781 up   | 0.03 | 8.80   | unknown protein                           |
| 112532 | 8.32  | 0.03 | 8.36  | 0.06 | 7.01  | 0.40 | 1.029 up   | 2.471 down | 0.01 | 18.22  | bHLH transcriptional regulator            |
| 112535 | 4.79  | 0.13 | 6.23  | 0.21 | 6.01  | 0.31 | 2.712 up   | 2.327 up   | 0.01 | 18.14  | unique protein                            |
| 112536 | 11.57 | 0.01 | 10.77 | 0.25 | 10.19 | 0.30 | 1.749 down | 2.604 down | 0.01 | 19.50  | unknown protein                           |
| 112538 | 6.90  | 0.09 | 5.41  | 0.02 | 7.95  | 0.16 | 2.815 down | 2.072 up   | 0.00 | 247.82 | C2H2 transcription factor                 |
| 112539 | 6.70  | 0.02 | 5.29  | 0.14 | 5.51  | 0.27 | 2.661 down | 2.286 down | 0.01 | 25.71  | Zn2Cys6 transcriptional regulator         |
| 112551 | 10.57 | 0.05 | 9.67  | 0.07 | 8.97  | 0.15 | 1.870 down | 3.024 down | 0.00 | 110.40 | unknown protein                           |
| 112559 | 2.56  | 0.11 | 2.73  | 0.01 | 4.30  | 0.15 | 1.126 up   | 3.351 up   | 0.00 | 172.72 | unknown protein                           |
| 112560 | 10.09 | 0.28 | 9.71  | 0.05 | 8.35  | 0.20 | 1.298 down | 3.333 down | 0.00 | 60.94  | Zn2Cys6 transcriptional regulator         |

|        |       |      |       |      |       |      |            |            |      |         |                                              |
|--------|-------|------|-------|------|-------|------|------------|------------|------|---------|----------------------------------------------|
| 112563 | 3.53  | 0.05 | 3.64  | 0.03 | 5.96  | 0.28 | 1.078 up   | 5.371 up   | 0.00 | 114.40  | α-ketoglutarate dependent (Fell) dioxygenase |
| 112578 | 4.55  | 0.30 | 4.19  | 0.22 | 5.65  | 0.21 | 1.287 down | 2.136 up   | 0.00 | 30.96   | unknown protein                              |
| 112580 | 2.76  | 0.04 | 2.78  | 0.05 | 4.54  | 0.19 | 1.015 up   | 3.443 up   | 0.00 | 143.16  | unknown protein                              |
| 112596 | 11.18 | 0.15 | 10.64 | 0.08 | 8.98  | 0.11 | 1.448 down | 4.583 down | 0.00 | 291.51  | flavoprotein monooxygenase                   |
| 112602 | 2.47  | 0.06 | 2.36  | 0.01 | 3.85  | 0.03 | 1.078 down | 2.595 up   | 0.00 | 1398.90 | unknown protein                              |
| 112603 | 2.26  | 0.20 | 2.42  | 0.10 | 3.71  | 0.06 | 1.121 up   | 2.732 up   | 0.00 | 153.62  | unique protein                               |
| 112604 | 2.29  | 0.17 | 2.36  | 0.06 | 3.80  | 0.10 | 1.049 up   | 2.849 up   | 0.00 | 171.94  | unique protein                               |
| 112605 | 2.16  | 0.17 | 2.21  | 0.09 | 3.54  | 0.09 | 1.033 up   | 2.608 up   | 0.00 | 154.51  | unique protein                               |
| 112629 | 5.06  | 0.64 | 5.42  | 0.08 | 6.60  | 0.49 | 1.284 up   | 2.916 up   | 0.04 | 8.46    | unique protein                               |
| 112631 | 5.90  | 0.15 | 6.80  | 0.25 | 7.58  | 0.20 | 1.875 up   | 3.216 up   | 0.00 | 46.98   | unique protein                               |
| 112638 | 3.49  | 0.27 | 3.57  | 0.24 | 5.04  | 0.34 | 1.056 up   | 2.926 up   | 0.01 | 23.73   | unknown protein                              |
| 112649 | 2.20  | 0.08 | 2.44  | 0.23 | 3.94  | 0.06 | 1.184 up   | 3.356 up   | 0.00 | 194.92  | unknown protein                              |
| 112651 | 2.58  | 0.08 | 2.55  | 0.05 | 3.70  | 0.03 | 1.020 down | 2.173 up   | 0.00 | 513.28  | unknown protein                              |
| 112656 | 8.57  | 0.03 | 7.53  | 0.25 | 7.27  | 0.18 | 2.052 down | 2.474 down | 0.00 | 36.25   | unique protein                               |
| 112665 | 9.82  | 0.02 | 7.25  | 0.16 | 7.18  | 0.28 | 5.943 down | 6.267 down | 0.00 | 99.23   | GCN5-related N-acetyltransferase             |
| 112675 | 2.43  | 0.02 | 2.45  | 0.24 | 4.53  | 0.25 | 1.007 up   | 4.269 up   | 0.00 | 90.23   | unknown protein                              |
| 112676 | 1.98  | 0.18 | 2.08  | 0.14 | 3.48  | 0.10 | 1.074 up   | 2.829 up   | 0.00 | 134.89  | unique protein                               |
| 112678 | 2.42  | 0.07 | 2.46  | 0.07 | 3.65  | 0.15 | 1.030 up   | 2.347 up   | 0.00 | 90.78   | unique protein                               |
| 112679 | 2.45  | 0.08 | 2.47  | 0.13 | 4.09  | 0.10 | 1.014 up   | 3.120 up   | 0.00 | 247.52  | unique protein                               |
| 112683 | 2.21  | 0.14 | 2.28  | 0.19 | 3.59  | 0.07 | 1.047 up   | 2.594 up   | 0.00 | 124.38  | unknown protein                              |
| 112685 | 2.53  | 0.02 | 2.72  | 0.18 | 4.30  | 0.10 | 1.141 up   | 3.407 up   | 0.00 | 214.57  | unknown protein                              |
| 112688 | 2.72  | 0.11 | 2.84  | 0.13 | 4.16  | 0.41 | 1.086 up   | 2.713 up   | 0.01 | 17.91   | unique protein                               |
| 112689 | 2.52  | 0.26 | 2.59  | 0.35 | 4.34  | 0.15 | 1.054 up   | 3.548 up   | 0.00 | 62.28   | unknown protein                              |
| 112695 | 3.71  | 0.40 | 3.73  | 0.24 | 5.01  | 0.13 | 1.011 up   | 2.453 up   | 0.00 | 30.54   | SSCRP                                        |
| 119534 | 13.98 | 0.01 | 13.69 | 0.06 | 12.64 | 0.17 | 1.220 down | 2.526 down | 0.00 | 79.21   | unique protein                               |
| 119552 | 8.94  | 0.05 | 9.19  | 0.08 | 10.38 | 0.07 | 1.189 up   | 2.725 up   | 0.00 | 383.62  | unique protein                               |
| 119556 | 11.42 | 0.03 | 9.96  | 0.01 | 10.03 | 0.55 | 2.752 down | 2.620 down | 0.04 | 8.39    | unknown protein. secreted                    |
| 119568 | 11.23 | 0.17 | 10.96 | 0.04 | 9.39  | 0.28 | 1.206 down | 3.590 down | 0.00 | 55.13   | unknown protein                              |
| 119607 | 12.48 | 0.04 | 11.67 | 0.09 | 10.95 | 0.10 | 1.762 down | 2.907 down | 0.00 | 191.47  | unknown protein                              |
| 119619 | 10.33 | 0.13 | 8.28  | 0.15 | 8.86  | 0.44 | 4.165 down | 2.780 down | 0.01 | 18.34   | unknown protein                              |

|        |       |      |       |      |       |      |            |             |      |        |                                                                                         |
|--------|-------|------|-------|------|-------|------|------------|-------------|------|--------|-----------------------------------------------------------------------------------------|
| 119620 | 11.04 | 0.02 | 10.62 | 0.11 | 9.84  | 0.30 | 1.343 down | 2.295 down  | 0.01 | 18.47  | Zn2Cys6 transcriptional regulator                                                       |
| 119710 | 12.91 | 0.01 | 10.98 | 0.08 | 10.81 | 0.13 | 3.821 down | 4.284 down  | 0.00 | 257.88 | MFS multidrug transporter                                                               |
| 119723 | 12.63 | 0.01 | 12.57 | 0.29 | 11.60 | 0.28 | 1.044 down | 2.050 down  | 0.01 | 15.65  | NSF attachment protein Sec17/alpha-SNAP                                                 |
| 119789 | 13.09 | 0.12 | 12.64 | 0.18 | 11.62 | 0.49 | 1.369 down | 2.762 down  | 0.02 | 10.73  | MFS permease                                                                            |
| 119800 | 11.17 | 0.04 | 12.14 | 0.04 | 12.17 | 0.10 | 1.953 up   | 2.000 up    | 0.00 | 113.19 | unknown protein                                                                         |
| 119805 | 13.14 | 0.20 | 13.44 | 0.16 | 14.20 | 0.29 | 1.232 up   | 2.096 up    | 0.02 | 14.34  | HFBs                                                                                    |
| 119806 | 12.18 | 0.05 | 12.97 | 0.00 | 13.60 | 0.10 | 1.723 up   | 2.677 up    | 0.00 | 200.54 | unknown protein. only in Gibberella. Magnaporthe and Chaetomium                         |
| 119816 | 11.20 | 0.12 | 11.84 | 0.10 | 12.45 | 0.36 | 1.562 up   | 2.392 up    | 0.02 | 12.97  | unknown protein                                                                         |
| 119823 | 13.22 | 0.04 | 12.51 | 0.15 | 11.79 | 0.19 | 1.635 down | 2.686 down  | 0.00 | 54.82  | SAM-dependent methyltransferases                                                        |
| 119825 | 3.61  | 0.19 | 3.93  | 0.00 | 5.31  | 0.49 | 1.242 up   | 3.237 up    | 0.01 | 15.96  | unknown protein                                                                         |
| 119826 | 11.37 | 0.25 | 10.07 | 0.03 | 7.13  | 0.62 | 2.461 down | 18.872 down | 0.00 | 55.71  | C2H2 transcriptional regulator                                                          |
| 119839 | 3.87  | 0.60 | 3.02  | 0.17 | 5.44  | 0.35 | 1.805 down | 2.966 up    | 0.00 | 29.04  | cyanamide hydratase                                                                     |
| 119856 | 12.24 | 0.22 | 12.23 | 0.02 | 11.22 | 0.23 | 1.007 down | 2.034 down  | 0.01 | 25.56  | E3 ubiquitin-protein ligase/Putative upstream regulatory element binding protein        |
| 119857 | 7.15  | 0.06 | 11.56 | 0.00 | 10.25 | 0.26 | 21.231 up  | 8.567 up    | 0.00 | 258.13 | unique protein                                                                          |
| 119860 | 10.86 | 0.08 | 11.37 | 0.02 | 9.71  | 0.35 | 1.423 up   | 2.222 down  | 0.01 | 27.66  | unknown protein                                                                         |
| 119864 | 9.25  | 0.02 | 6.08  | 0.25 | 6.95  | 0.32 | 9.027 down | 4.933 down  | 0.00 | 74.84  | unknown protein                                                                         |
| 119876 | 11.86 | 0.20 | 12.00 | 0.07 | 12.88 | 0.12 | 1.103 up   | 2.027 up    | 0.00 | 50.03  | aspartyl protease                                                                       |
| 119895 | 11.86 | 0.07 | 11.91 | 0.13 | 10.61 | 0.32 | 1.040 up   | 2.374 down  | 0.01 | 24.19  | unknown protein                                                                         |
| 119896 | 11.85 | 0.01 | 11.47 | 0.04 | 9.97  | 0.28 | 1.306 down | 3.683 down  | 0.00 | 61.71  | malic enzyme                                                                            |
| 119902 | 12.69 | 0.11 | 10.43 | 0.05 | 11.41 | 0.25 | 4.795 down | 2.418 down  | 0.00 | 65.44  | unique protein                                                                          |
| 119960 | 9.28  | 0.14 | 9.61  | 0.23 | 10.48 | 0.28 | 1.254 up   | 2.295 up    | 0.01 | 18.07  | unique protein                                                                          |
| 119963 | 12.77 | 0.05 | 13.04 | 0.09 | 13.80 | 0.05 | 1.202 up   | 2.031 up    | 0.00 | 244.10 | HFBs                                                                                    |
| 119989 | 13.80 | 0.03 | 13.75 | 0.12 | 14.81 | 0.14 | 1.034 down | 2.015 up    | 0.00 | 74.14  | HFB2                                                                                    |
| 120008 | 12.11 | 0.28 | 13.17 | 0.14 | 13.12 | 0.27 | 2.084 up   | 2.017 up    | 0.02 | 12.86  | GMC oxidoreductase                                                                      |
| 120031 | 12.53 | 0.11 | 13.82 | 0.02 | 14.12 | 0.30 | 2.450 up   | 3.009 up    | 0.00 | 31.30  | unknown protein                                                                         |
| 120060 | 12.38 | 0.08 | 12.22 | 0.10 | 11.37 | 0.21 | 1.112 down | 2.008 down  | 0.00 | 29.67  | unknown protein with pleckstrin like domain                                             |
| 120079 | 11.02 | 0.19 | 10.35 | 0.16 | 9.64  | 0.26 | 1.595 down | 2.608 down  | 0.01 | 25.40  | mitochondrial acetoacetyl-CoA thiolase-like protein                                     |
| 120088 | 10.22 | 0.12 | 10.60 | 0.10 | 12.10 | 0.31 | 1.302 up   | 3.685 up    | 0.00 | 46.15  | cytosolic asparaginyl-tRNA synthetase. required for protein synthesis. catalyzes the sp |
| 120106 | 11.44 | 0.10 | 12.44 | 0.28 | 12.85 | 0.26 | 1.999 up   | 2.648 up    | 0.01 | 22.23  | Isopentenyl diphosphate:dimethylallyl diphosphate isomerase                             |
| 120113 | 11.19 | 0.00 | 10.66 | 0.12 | 10.15 | 0.18 | 1.444 down | 2.062 down  | 0.00 | 34.96  | unknown protein                                                                         |

|        |       |      |       |      |       |      |              |            |      |        |                                                                          |
|--------|-------|------|-------|------|-------|------|--------------|------------|------|--------|--------------------------------------------------------------------------|
| 120125 | 12.13 | 0.12 | 11.78 | 0.20 | 10.85 | 0.14 | 1.277 down   | 2.433 down | 0.00 | 56.09  | unknown protein                                                          |
| 120160 | 12.49 | 0.09 | 13.00 | 0.37 | 13.74 | 0.10 | 1.428 up     | 2.378 up   | 0.00 | 31.86  | unknown protein                                                          |
| 120172 | 12.14 | 0.06 | 11.77 | 0.16 | 11.04 | 0.41 | 1.285 down   | 2.139 down | 0.04 | 8.31   | flavodoxin and radical SAM domain protein                                |
| 120198 | 13.70 | 0.17 | 13.30 | 0.01 | 12.32 | 0.18 | 1.323 down   | 2.604 down | 0.00 | 57.56  | glycosyl transferase. family 35. glycogen phosphorylase 1                |
| 120229 | 7.18  | 0.12 | 5.04  | 0.56 | 13.25 | 0.80 | 4.392 down   | 67.461 up  | 0.00 | 117.81 | GH10 endo- $\beta$ -1.4-xylanase XYN3                                    |
| 120248 | 10.10 | 0.11 | 8.90  | 0.03 | 9.06  | 0.44 | 2.296 down   | 2.051 down | 0.04 | 7.61   | unknown protein                                                          |
| 120260 | 8.99  | 0.01 | 9.28  | 0.06 | 10.18 | 0.39 | 1.219 up     | 2.267 up   | 0.02 | 12.22  | ribosomal protein L24e. putative                                         |
| 120272 | 11.02 | 0.12 | 10.84 | 0.07 | 9.96  | 0.14 | 1.138 down   | 2.083 down | 0.00 | 59.65  | 64 kDa mitochondrial NADH dehydrogenase. putative                        |
| 120294 | 5.83  | 0.19 | 6.52  | 0.41 | 6.98  | 0.07 | 1.606 up     | 2.216 up   | 0.01 | 20.21  | unknown protein                                                          |
| 120311 | 10.57 | 0.15 | 8.77  | 0.14 | 12.83 | 0.22 | 3.486 down   | 4.803 up   | 0.00 | 321.21 | unique protein                                                           |
| 120312 | 10.86 | 0.21 | 6.74  | 0.10 | 14.81 | 0.26 | 17.338 down  | 15.462 up  | 0.00 | 846.37 | GH5 endo- $\beta$ -1.4-glucanase EGL2/CEL5a                              |
| 120326 | 10.77 | 0.15 | 10.21 | 0.05 | 8.72  | 0.29 | 1.472 down   | 4.129 down | 0.00 | 59.77  | unknown protein                                                          |
| 120351 | 9.69  | 0.17 | 10.45 | 0.11 | 10.71 | 0.14 | 1.691 up     | 2.020 up   | 0.00 | 36.34  | unknown protein                                                          |
| 120363 | 7.04  | 0.14 | 7.25  | 0.16 | 5.93  | 0.56 | 1.151 up     | 2.172 down | 0.04 | 7.72   | C2H2 transcriptional regulator                                           |
| 120365 | 11.07 | 0.12 | 10.04 | 0.11 | 9.78  | 0.33 | 2.044 down   | 2.434 down | 0.01 | 15.71  | BZIP transcriptional regulator                                           |
| 120370 | 12.72 | 0.05 | 13.33 | 0.05 | 13.74 | 0.02 | 1.519 up     | 2.024 up   | 0.00 | 501.09 | unknown protein                                                          |
| 120371 | 13.55 | 0.12 | 6.22  | 0.16 | 10.49 | 0.85 | 161.771 down | 8.375 down | 0.00 | 61.55  | Catalase                                                                 |
| 120381 | 11.41 | 0.09 | 12.85 | 0.06 | 8.69  | 0.45 | 2.719 up     | 6.564 down | 0.00 | 104.43 | unique protein                                                           |
| 120415 | 10.57 | 0.02 | 12.80 | 0.11 | 11.67 | 0.11 | 4.687 up     | 2.154 up   | 0.00 | 273.94 | unknown protein                                                          |
| 120451 | 6.67  | 0.10 | 7.57  | 0.07 | 8.38  | 0.30 | 1.872 up     | 3.275 up   | 0.00 | 34.67  | unknown protein                                                          |
| 120473 | 8.00  | 0.01 | 8.22  | 0.08 | 9.09  | 0.28 | 1.170 up     | 2.137 up   | 0.01 | 21.12  | Dihydrolipoamide transacylase (alpha-keto acid dehydrogenase E2 subunit) |
| 120475 | 13.16 | 0.02 | 12.41 | 0.02 | 11.91 | 0.16 | 1.685 down   | 2.386 down | 0.00 | 65.47  | C2H2 transcriptional regulator                                           |
| 120486 | 9.09  | 0.09 | 9.79  | 0.01 | 11.21 | 0.24 | 1.624 up     | 4.346 up   | 0.00 | 91.20  | auxiliary protein of DNA polymerase delta                                |
| 120489 | 12.66 | 0.06 | 11.43 | 0.06 | 11.08 | 0.04 | 2.331 down   | 2.972 down | 0.00 | 698.58 | unknown protein                                                          |
| 120504 | 9.93  | 0.06 | 8.58  | 0.07 | 13.18 | 0.28 | 2.557 down   | 9.472 up   | 0.00 | 323.72 | unique protein                                                           |
| 120571 | 9.68  | 0.17 | 10.36 | 0.12 | 12.03 | 0.55 | 1.596 up     | 5.082 up   | 0.01 | 22.57  | pre-rRNA-processing protein PNO1                                         |
| 120597 | 14.15 | 0.09 | 12.62 | 0.07 | 11.06 | 0.18 | 2.887 down   | 8.540 down | 0.00 | 286.58 | C2H2 transcriptional regulator                                           |
| 120623 | 14.26 | 0.09 | 13.16 | 0.07 | 13.05 | 0.30 | 2.154 down   | 2.316 down | 0.01 | 18.21  | unknown protein                                                          |
| 120688 | 5.26  | 0.28 | 5.84  | 0.19 | 6.66  | 0.28 | 1.495 up     | 2.635 up   | 0.01 | 20.20  | unique protein                                                           |
| 120697 | 11.88 | 0.15 | 13.65 | 0.12 | 14.05 | 0.18 | 3.428 up     | 4.518 up   | 0.00 | 125.05 | SSCRP                                                                    |

|        |       |      |       |      |       |      |             |            |      |         |                                                                                   |
|--------|-------|------|-------|------|-------|------|-------------|------------|------|---------|-----------------------------------------------------------------------------------|
| 120702 | 9.03  | 0.30 | 9.29  | 0.03 | 11.27 | 0.08 | 1.202 up    | 4.743 up   | 0.00 | 206.28  | unknown protein                                                                   |
| 120715 | 11.33 | 0.17 | 10.27 | 0.17 | 10.31 | 0.23 | 2.085 down  | 2.028 down | 0.01 | 18.08   | Zn2Cys6 transcriptional regulator                                                 |
| 120733 | 10.99 | 0.09 | 11.55 | 0.01 | 12.86 | 0.21 | 1.470 up    | 3.649 up   | 0.00 | 98.31   | mitochondrial import inner membrane translocase subunit TIM13 / Zn-finger. Tim10/ |
| 120749 | 13.19 | 0.01 | 11.91 | 0.08 | 14.50 | 0.06 | 2.428 down  | 2.475 up   | 0.00 | 1411.91 | GH1 $\beta$ -glucosidase BGL2/CEL1a                                               |
| 120751 | 12.33 | 0.09 | 11.32 | 0.08 | 11.18 | 0.13 | 2.015 down  | 2.226 down | 0.00 | 75.50   | unknown protein                                                                   |
| 120752 | 11.71 | 0.08 | 11.23 | 0.02 | 9.96  | 0.17 | 1.396 down  | 3.362 down | 0.00 | 129.33  | K <sup>+</sup> transporter Trk1                                                   |
| 120784 | 12.80 | 0.12 | 12.12 | 0.09 | 11.33 | 0.12 | 1.608 down  | 2.766 down | 0.00 | 108.24  | cell wall mannoprotein                                                            |
| 120791 | 11.95 | 0.07 | 12.45 | 0.25 | 13.03 | 0.35 | 1.410 up    | 2.105 up   | 0.03 | 9.32    | unknown protein                                                                   |
| 120823 | 13.71 | 0.13 | 14.20 | 0.12 | 14.79 | 0.03 | 1.409 up    | 2.117 up   | 0.00 | 113.10  | cell wall mannoprotein                                                            |
| 120828 | 11.92 | 0.11 | 12.23 | 0.43 | 13.21 | 0.36 | 1.240 up    | 2.442 up   | 0.02 | 11.44   | unknown protein                                                                   |
| 120872 | 11.24 | 0.11 | 9.96  | 0.01 | 9.47  | 0.44 | 2.434 down  | 3.420 down | 0.01 | 17.82   | GCN5 N-acetyltransferase                                                          |
| 120873 | 4.82  | 0.29 | 4.73  | 0.18 | 8.28  | 0.26 | 1.069 down  | 11.000 up  | 0.00 | 191.27  | GH71 $\alpha$ -1 3-glucanase                                                      |
| 120889 | 11.83 | 0.28 | 12.17 | 0.07 | 10.75 | 0.38 | 1.271 up    | 2.110 down | 0.01 | 15.46   | cytochrome P450. putative                                                         |
| 120911 | 12.54 | 0.03 | 10.88 | 0.12 | 9.44  | 0.18 | 3.158 down  | 8.588 down | 0.00 | 300.30  | short chain dehydrogenase/reductase                                               |
| 120926 | 6.16  | 0.00 | 4.14  | 0.41 | 7.47  | 0.56 | 4.050 down  | 2.468 up   | 0.00 | 33.19   | unique protein                                                                    |
| 120927 | 5.16  | 0.18 | 6.13  | 0.16 | 7.84  | 0.76 | 1.963 up    | 6.440 up   | 0.01 | 14.82   | ankyrin containing protein                                                        |
| 120931 | 7.20  | 0.15 | 10.08 | 0.13 | 10.84 | 0.20 | 7.346 up    | 12.502 up  | 0.00 | 275.08  | unknown protein                                                                   |
| 120961 | 8.65  | 0.10 | 3.31  | 0.15 | 13.06 | 0.69 | 40.524 down | 21.244 up  | 0.00 | 218.45  | GH61 polysaccharide monooxygenase CEL61b                                          |
| 120968 | 6.19  | 0.65 | 4.64  | 0.42 | 9.96  | 0.23 | 2.928 down  | 13.631 up  | 0.00 | 143.64  | Copper chaperone for superoxide dismutase                                         |
| 120969 | 10.53 | 0.00 | 11.16 | 0.08 | 11.64 | 0.04 | 1.548 up    | 2.148 up   | 0.00 | 354.23  | NADPH oxidase regulator NoxR                                                      |
| 120978 | 13.23 | 0.03 | 13.39 | 0.29 | 14.24 | 0.14 | 1.121 up    | 2.011 up   | 0.00 | 29.96   | large ribosomal subunit (protein L34e).                                           |
| 120981 | 11.07 | 0.07 | 10.66 | 0.03 | 9.43  | 0.29 | 1.324 down  | 3.117 down | 0.00 | 42.51   | magnesium and cobalt transporter CorA                                             |
| 120993 | 4.37  | 0.44 | 3.99  | 0.15 | 6.23  | 0.22 | 1.306 down  | 3.637 up   | 0.00 | 58.22   | unknown protein                                                                   |
| 121042 | 8.57  | 0.50 | 9.87  | 0.05 | 11.49 | 0.47 | 2.457 up    | 7.562 up   | 0.00 | 32.25   | unknown protein                                                                   |
| 121058 | 3.75  | 0.31 | 3.92  | 0.01 | 4.92  | 0.09 | 1.119 up    | 2.244 up   | 0.00 | 49.28   | unknown protein                                                                   |
| 121095 | 11.22 | 0.04 | 10.98 | 0.10 | 9.89  | 0.26 | 1.186 down  | 2.528 down | 0.00 | 36.27   | cell cycle control protein (Cwf19). putative                                      |
| 121107 | 11.66 | 0.05 | 11.94 | 0.13 | 10.55 | 0.20 | 1.213 up    | 2.152 down | 0.00 | 56.60   | Zn2Cys6 transcriptional regulator                                                 |
| 121121 | 9.74  | 0.05 | 10.22 | 0.04 | 10.88 | 0.38 | 1.399 up    | 2.196 up   | 0.03 | 10.51   | Zn2Cys6 transcriptional regulator                                                 |
| 121127 | 10.11 | 0.01 | 6.03  | 0.25 | 12.36 | 0.46 | 17.003 down | 4.756 up   | 0.00 | 189.98  | GH3 $\beta$ -xylosidase BXL1                                                      |
| 121130 | 8.65  | 0.16 | 8.68  | 0.12 | 7.54  | 0.44 | 1.021 up    | 2.166 down | 0.03 | 10.48   | Zn2Cys6 transcriptional regulator                                                 |

|        |       |      |       |      |       |      |             |             |      |         |                                                                                      |
|--------|-------|------|-------|------|-------|------|-------------|-------------|------|---------|--------------------------------------------------------------------------------------|
| 121135 | 2.40  | 0.04 | 3.51  | 0.56 | 3.83  | 0.10 | 2.155 up    | 2.695 up    | 0.01 | 20.25   | SSCRP                                                                                |
| 121171 | 8.76  | 0.21 | 9.82  | 0.07 | 9.89  | 0.37 | 2.084 up    | 2.196 up    | 0.03 | 9.86    | replication fork protection component Swi3                                           |
| 121187 | 11.13 | 0.12 | 9.56  | 0.17 | 9.66  | 0.12 | 2.968 down  | 2.772 down  | 0.00 | 98.83   | unknown protein                                                                      |
| 121203 | 11.80 | 0.02 | 11.19 | 0.14 | 10.77 | 0.24 | 1.527 down  | 2.032 down  | 0.01 | 18.13   | unknown protein                                                                      |
| 121226 | 10.37 | 0.15 | 11.73 | 0.03 | 11.46 | 0.47 | 2.555 up    | 2.130 up    | 0.04 | 7.90    | unknown protein                                                                      |
| 121230 | 12.08 | 0.04 | 12.21 | 0.10 | 13.33 | 0.32 | 1.100 up    | 2.390 up    | 0.01 | 22.86   | unique protein                                                                       |
| 121294 | 11.82 | 0.19 | 11.08 | 0.13 | 10.59 | 0.29 | 1.670 down  | 2.337 down  | 0.01 | 16.22   | glucan endo-1.3(4)- $\beta$ -D-glucosidase                                           |
| 121295 | 13.13 | 0.04 | 12.85 | 0.24 | 11.98 | 0.16 | 1.210 down  | 2.214 down  | 0.00 | 37.63   | Dolichol kinase Sec59                                                                |
| 121308 | 12.31 | 0.04 | 13.04 | 0.22 | 13.37 | 0.13 | 1.666 up    | 2.084 up    | 0.00 | 37.60   | PutA delta-1-pyrroline-5-carboxylate dehydrogenase                                   |
| 121315 | 4.02  | 0.48 | 4.44  | 0.05 | 5.78  | 0.25 | 1.335 up    | 3.384 up    | 0.00 | 29.29   | unknown protein                                                                      |
| 121337 | 5.24  | 0.27 | 4.61  | 0.24 | 6.26  | 0.34 | 1.552 down  | 2.022 up    | 0.01 | 20.66   | unknown protein                                                                      |
| 121372 | 12.83 | 0.02 | 12.95 | 0.04 | 14.24 | 0.04 | 1.084 up    | 2.660 up    | 0.00 | 1177.99 | 60S ribosomal protein L38 by homology with corresponding proteins in other fungi and |
| 121397 | 12.35 | 0.37 | 12.30 | 0.06 | 13.39 | 0.19 | 1.036 down  | 2.050 up    | 0.01 | 22.62   | Sec61alpha subunit                                                                   |
| 121405 | 12.11 | 0.10 | 10.11 | 0.02 | 8.67  | 0.26 | 4.002 down  | 10.879 down | 0.00 | 190.87  | 4-aminobutyrate aminotransferase                                                     |
| 121412 | 10.15 | 0.00 | 12.32 | 0.08 | 11.64 | 0.14 | 4.497 up    | 2.811 up    | 0.00 | 204.64  | Zn2Cys6 transcriptional regulator                                                    |
| 121415 | 8.47  | 0.06 | 12.02 | 0.13 | 13.35 | 0.16 | 11.737 up   | 29.400 up   | 0.00 | 834.80  | Zn2Cys6 transcriptional regulator                                                    |
| 121417 | 4.74  | 0.18 | 4.32  | 0.56 | 5.95  | 0.17 | 1.340 down  | 2.317 up    | 0.01 | 24.46   | unknown protein with fasciclin domain                                                |
| 121439 | 12.27 | 0.22 | 10.67 | 0.07 | 10.88 | 0.30 | 3.040 down  | 2.622 down  | 0.01 | 25.39   | unknown protein                                                                      |
| 121441 | 12.83 | 0.05 | 13.11 | 0.36 | 11.10 | 0.22 | 1.208 up    | 3.323 down  | 0.00 | 63.12   | carbounknown proteinlic acid transporter                                             |
| 121464 | 12.11 | 0.01 | 12.35 | 0.07 | 13.80 | 0.14 | 1.181 up    | 3.226 up    | 0.00 | 186.05  | GcvHGlycine cleavage system H protein (lipoate-binding)                              |
| 121474 | 12.36 | 0.07 | 11.85 | 0.09 | 10.33 | 0.39 | 1.420 down  | 4.098 down  | 0.00 | 35.59   | Zn2Cys6 transcriptional regulator                                                    |
| 121486 | 11.63 | 0.07 | 7.94  | 0.18 | 8.78  | 1.35 | 12.952 down | 7.206 down  | 0.05 | 7.13    | unknown protein                                                                      |
| 121495 | 4.55  | 0.24 | 3.80  | 0.05 | 7.79  | 0.18 | 1.677 down  | 9.463 up    | 0.00 | 430.05  | Vacuolar proteinase B (yscB). a serine protease of the subtilisin family             |
| 121498 | 12.43 | 0.09 | 8.82  | 0.01 | 10.99 | 0.27 | 12.234 down | 2.704 down  | 0.00 | 152.30  | Phosphatidylserine decarboxylase                                                     |
| 121516 | 13.61 | 0.04 | 13.96 | 0.04 | 14.70 | 0.09 | 1.279 up    | 2.128 up    | 0.00 | 148.78  | histone H2B                                                                          |
| 121579 | 11.15 | 0.04 | 11.75 | 0.13 | 12.18 | 0.15 | 1.519 up    | 2.047 up    | 0.00 | 43.56   | unknown protein                                                                      |
| 121594 | 6.92  | 0.04 | 4.35  | 0.39 | 5.42  | 0.14 | 5.975 down  | 2.831 down  | 0.00 | 78.88   | unique protein                                                                       |
| 121602 | 12.22 | 0.03 | 11.99 | 0.07 | 10.88 | 0.09 | 1.168 down  | 2.527 down  | 0.00 | 249.24  | Zn2Cys6 transcriptional regulator                                                    |
| 121608 | 11.32 | 0.18 | 10.10 | 0.03 | 8.39  | 0.28 | 2.331 down  | 7.628 down  | 0.00 | 111.92  | MFS permease                                                                         |
| 121638 | 11.27 | 0.14 | 9.76  | 0.04 | 10.16 | 0.38 | 2.859 down  | 2.162 down  | 0.02 | 13.96   | unique protein                                                                       |

|        |       |      |       |      |       |      |             |            |      |         |                                                    |
|--------|-------|------|-------|------|-------|------|-------------|------------|------|---------|----------------------------------------------------|
| 121664 | 7.66  | 0.12 | 7.63  | 0.20 | 8.93  | 0.51 | 1.022 down  | 2.411 up   | 0.03 | 9.97    | Glutamate decarboxylase and related proteins       |
| 121693 | 12.49 | 0.18 | 11.28 | 0.00 | 10.92 | 0.14 | 2.324 down  | 2.982 down | 0.00 | 91.88   | Glutathione-dependent formaldehyde-activating. GFA |
| 121735 | 10.35 | 0.09 | 12.11 | 0.07 | 12.74 | 0.46 | 3.392 up    | 5.256 up   | 0.00 | 30.06   | GH3 $\beta$ -glucosidase CEL3b                     |
| 121741 | 12.65 | 0.02 | 13.06 | 0.27 | 13.67 | 0.16 | 1.323 up    | 2.025 up   | 0.01 | 25.48   | Ribosomal protein S7                               |
| 121743 | 12.98 | 0.20 | 13.10 | 0.04 | 11.76 | 0.59 | 1.088 up    | 2.331 down | 0.04 | 7.69    | Mitochondrial succinate/fumarate antiporter        |
| 121746 | 10.83 | 0.07 | 11.79 | 0.14 | 12.79 | 0.48 | 1.952 up    | 3.896 up   | 0.01 | 18.19   | GH55 exo-1 3- $\beta$ -glucanase GLUC78            |
| 121773 | 10.87 | 0.03 | 11.79 | 0.11 | 9.81  | 0.57 | 1.896 up    | 2.074 down | 0.02 | 13.67   | unknown protein                                    |
| 121785 | 10.15 | 0.02 | 5.84  | 0.13 | 9.01  | 0.21 | 19.861 down | 2.194 down | 0.00 | 357.38  | ATP-dependent RNA helicase                         |
| 121800 | 13.18 | 0.10 | 12.38 | 0.13 | 11.86 | 0.17 | 1.748 down  | 2.510 down | 0.00 | 52.17   | stomatin-like protein                              |
| 121804 | 10.73 | 0.07 | 11.02 | 0.01 | 12.03 | 0.23 | 1.225 up    | 2.470 up   | 0.00 | 42.84   | Ribosomal protein S15.                             |
| 121824 | 11.53 | 0.16 | 11.37 | 0.18 | 12.87 | 0.30 | 1.118 down  | 2.540 up   | 0.00 | 31.83   | ATP citrate lyase. alpha subunit                   |
| 121864 | 11.79 | 0.12 | 11.70 | 0.10 | 10.16 | 0.30 | 1.059 down  | 3.088 down | 0.00 | 42.20   | unknown protein                                    |
| 121870 | 10.48 | 0.16 | 8.58  | 0.04 | 9.20  | 0.13 | 3.727 down  | 2.435 down | 0.00 | 128.32  | unknown protein                                    |
| 121877 | 10.63 | 0.07 | 8.40  | 0.32 | 8.74  | 0.09 | 4.705 down  | 3.710 down | 0.00 | 113.70  | epoxide hydrolase                                  |
| 121883 | 10.62 | 0.25 | 13.39 | 0.20 | 12.84 | 0.23 | 6.827 up    | 4.673 up   | 0.00 | 89.26   | unique secreted protein                            |
| 121906 | 12.31 | 0.11 | 12.81 | 0.11 | 13.33 | 0.18 | 1.414 up    | 2.027 up   | 0.00 | 28.94   | 40s ribosomal protein S14 (S11 family).            |
| 121944 | 13.08 | 0.04 | 12.90 | 0.02 | 11.98 | 0.23 | 1.128 down  | 2.144 down | 0.00 | 32.29   | serine/threonine protein kinase                    |
| 121948 | 11.13 | 0.07 | 11.98 | 0.33 | 12.74 | 0.18 | 1.810 up    | 3.070 up   | 0.00 | 42.02   | signal peptidase spc12                             |
| 121968 | 11.79 | 0.07 | 11.02 | 0.01 | 10.64 | 0.20 | 1.714 down  | 2.219 down | 0.00 | 35.18   | serine peptidase S28                               |
| 121989 | 12.21 | 0.01 | 12.04 | 0.12 | 11.05 | 0.22 | 1.126 down  | 2.243 down | 0.00 | 38.75   | oxalate decarboxylase                              |
| 122007 | 9.81  | 0.02 | 11.27 | 0.00 | 12.07 | 0.12 | 2.737 up    | 4.789 up   | 0.00 | 366.67  | unique protein                                     |
| 122040 | 12.31 | 0.12 | 12.55 | 0.09 | 13.34 | 0.08 | 1.178 up    | 2.036 up   | 0.00 | 102.68  | ribosomal protein L31e.                            |
| 122048 | 11.56 | 0.05 | 12.03 | 0.37 | 13.40 | 0.28 | 1.382 up    | 3.580 up   | 0.00 | 36.35   | Sec61 beta subunit                                 |
| 122081 | 8.69  | 0.23 | 7.09  | 0.06 | 13.76 | 0.40 | 3.019 down  | 33.524 up  | 0.00 | 332.44  | GH7 Endo- $\beta$ -1.4-glucanase EGL1/CEL7b        |
| 122089 | 10.66 | 0.22 | 7.76  | 0.24 | 9.05  | 0.47 | 7.444 down  | 3.053 down | 0.01 | 26.94   | unknown protein                                    |
| 122091 | 12.42 | 0.00 | 11.60 | 0.00 | 11.04 | 0.04 | 1.767 down  | 2.592 down | 0.00 | 1206.45 | phospholipase of papatin-family                    |
| 122096 | 5.80  | 0.30 | 6.49  | 0.16 | 8.68  | 0.50 | 1.613 up    | 7.382 up   | 0.00 | 38.73   | unknown protein                                    |
| 122102 | 9.89  | 0.02 | 9.79  | 0.03 | 8.85  | 0.20 | 1.067 down  | 2.049 down | 0.00 | 42.05   | unknown protein                                    |
| 122104 | 10.48 | 0.21 | 9.95  | 0.23 | 9.24  | 0.29 | 1.447 down  | 2.368 down | 0.01 | 16.05   | Xanthine/uracil permease family                    |
| 122113 | 13.45 | 0.10 | 13.78 | 0.01 | 14.53 | 0.08 | 1.257 up    | 2.126 up   | 0.00 | 145.86  | unknown protein                                    |

|        |       |      |       |      |       |      |            |            |      |         |                                                                      |
|--------|-------|------|-------|------|-------|------|------------|------------|------|---------|----------------------------------------------------------------------|
| 122127 | 13.76 | 0.11 | 14.42 | 0.06 | 14.78 | 0.25 | 1.574 up   | 2.024 up   | 0.01 | 16.94   | SSCRP                                                                |
| 122140 | 12.07 | 0.21 | 11.95 | 0.26 | 10.69 | 0.49 | 1.085 down | 2.592 down | 0.03 | 10.38   | unique protein                                                       |
| 122160 | 9.13  | 0.18 | 10.01 | 0.12 | 6.87  | 0.29 | 1.845 up   | 4.787 down | 0.00 | 128.41  | Heat shock proteinwith DnaJ domain                                   |
| 122169 | 11.58 | 0.16 | 11.30 | 0.08 | 10.57 | 0.20 | 1.214 down | 2.011 down | 0.01 | 27.05   | Histidine kinase. part of a two component signal transduction system |
| 122212 | 12.50 | 0.13 | 12.15 | 0.11 | 11.37 | 0.25 | 1.276 down | 2.188 down | 0.01 | 22.84   | vacuolar protein-sorting protein BRO1                                |
| 122240 | 13.30 | 0.03 | 13.09 | 0.07 | 12.16 | 0.24 | 1.159 down | 2.210 down | 0.00 | 29.68   | Carnitine o-acyltransferase                                          |
| 122278 | 9.28  | 0.10 | 9.14  | 0.06 | 10.33 | 0.18 | 1.099 down | 2.065 up   | 0.00 | 54.12   | U3 small nucleolar RNA associated protein (SOF1)                     |
| 122284 | 14.05 | 0.07 | 13.54 | 0.05 | 12.66 | 0.09 | 1.420 down | 2.615 down | 0.00 | 220.23  | vel1. velvet protein                                                 |
| 122293 | 11.06 | 0.08 | 11.01 | 0.09 | 9.58  | 0.16 | 1.035 down | 2.797 down | 0.00 | 118.68  | unknown protein                                                      |
| 122350 | 12.43 | 0.05 | 11.98 | 0.04 | 10.61 | 0.21 | 1.366 down | 3.530 down | 0.00 | 94.48   | Glutamate decarboxylase                                              |
| 122363 | 8.91  | 0.06 | 7.44  | 0.07 | 10.23 | 0.31 | 2.768 down | 2.497 up   | 0.00 | 89.98   | Hsp26/Hsp42                                                          |
| 122366 | 10.77 | 0.13 | 10.55 | 0.04 | 9.69  | 0.19 | 1.161 down | 2.117 down | 0.00 | 38.05   | unknown protein                                                      |
| 122374 | 11.12 | 0.03 | 13.66 | 0.05 | 13.94 | 0.43 | 5.802 up   | 7.071 up   | 0.00 | 49.66   | MRSP1/expansin-like                                                  |
| 122422 | 9.27  | 0.13 | 12.00 | 0.07 | 11.46 | 0.21 | 6.607 up   | 4.563 up   | 0.00 | 143.26  | SSCRP                                                                |
| 122448 | 7.53  | 0.06 | 7.88  | 0.04 | 10.44 | 0.07 | 1.273 up   | 7.482 up   | 0.00 | 1764.05 | C2H2 transcription factor                                            |
| 122499 | 8.17  | 0.03 | 7.31  | 0.51 | 9.71  | 0.16 | 1.816 down | 2.904 up   | 0.00 | 63.03   | unknown protein                                                      |
| 122505 | 12.45 | 0.04 | 10.91 | 0.08 | 10.41 | 0.09 | 2.914 down | 4.134 down | 0.00 | 473.05  | aryl-alcohol dehydrogenase                                           |
| 122526 | 6.72  | 0.12 | 6.77  | 0.17 | 9.27  | 0.26 | 1.039 up   | 5.874 up   | 0.00 | 126.86  | unknown protein                                                      |
| 122529 | 10.64 | 0.12 | 11.90 | 0.23 | 11.96 | 0.50 | 2.395 up   | 2.493 up   | 0.04 | 7.62    | S1/P1 Nuclease                                                       |
| 122541 | 12.54 | 0.01 | 12.30 | 0.07 | 10.99 | 0.21 | 1.175 down | 2.915 down | 0.00 | 76.12   | C2H2 transcriptional regulator                                       |
| 122556 | 7.37  | 0.20 | 10.21 | 0.23 | 11.18 | 0.90 | 7.167 up   | 13.985 up  | 0.01 | 19.08   | Short-chain dehydrogenase/reductase                                  |
| 122567 | 13.64 | 0.27 | 12.79 | 0.04 | 12.57 | 0.21 | 1.795 down | 2.102 down | 0.01 | 19.33   | unknown protein                                                      |
| 122572 | 13.14 | 0.01 | 13.00 | 0.18 | 14.35 | 0.10 | 1.105 down | 2.299 up   | 0.00 | 129.62  | hsp70 family protein                                                 |
| 122579 | 9.39  | 0.06 | 11.87 | 0.05 | 11.69 | 0.44 | 5.546 up   | 4.905 up   | 0.00 | 36.15   | unknown protein. 4TM                                                 |
| 122614 | 11.35 | 0.16 | 10.20 | 0.07 | 9.58  | 0.31 | 2.211 down | 3.394 down | 0.00 | 31.82   | unique protein                                                       |
| 122629 | 7.92  | 0.12 | 9.97  | 0.01 | 9.72  | 0.49 | 4.133 up   | 3.481 up   | 0.01 | 18.37   | unique protein                                                       |
| 122745 | 8.89  | 0.07 | 9.77  | 0.22 | 10.58 | 0.07 | 1.845 up   | 3.234 up   | 0.00 | 142.63  | 2-oxoisovalerate dehydrogenase subunit beta. putative                |
| 122778 | 12.17 | 0.04 | 9.23  | 0.02 | 10.73 | 0.07 | 7.686 down | 2.730 down | 0.00 | 1319.23 | short chain dehydrogenase/reductase                                  |
| 122780 | 11.31 | 0.04 | 13.46 | 0.10 | 13.91 | 0.27 | 4.450 up   | 6.086 up   | 0.00 | 99.32   | GH28 exo-rhamnogalacturonase RGX1                                    |
| 122795 | 9.60  | 0.26 | 8.99  | 0.10 | 8.15  | 0.31 | 1.517 down | 2.720 down | 0.01 | 19.98   | PTH11 GPCR                                                           |



|        |       |      |       |      |       |      |             |            |      |         |                                                              |
|--------|-------|------|-------|------|-------|------|-------------|------------|------|---------|--------------------------------------------------------------|
| 122813 | 10.24 | 0.11 | 11.33 | 0.01 | 12.23 | 0.44 | 2.128 up    | 3.983 up   | 0.01 | 22.96   | unique protein                                               |
| 122819 | 10.36 | 0.14 | 11.24 | 0.18 | 12.30 | 0.27 | 1.837 up    | 3.820 up   | 0.00 | 49.29   | DNA replication complex GINS protein PSF3                    |
| 122820 | 8.77  | 0.14 | 4.27  | 0.15 | 7.06  | 0.88 | 22.692 down | 3.281 down | 0.01 | 22.01   | Kynurenine aminotransferase. glutamine transaminase K        |
| 122824 | 6.85  | 0.25 | 3.43  | 0.13 | 11.99 | 0.62 | 10.764 down | 35.206 up  | 0.00 | 212.69  | PTH11 GPCR                                                   |
| 122825 | 10.74 | 0.09 | 9.70  | 0.06 | 8.79  | 0.32 | 2.051 down  | 3.847 down | 0.00 | 40.84   | unknown protein                                              |
| 122870 | 10.96 | 0.12 | 12.03 | 0.03 | 12.80 | 0.38 | 2.089 up    | 3.578 up   | 0.01 | 24.87   | cell wall protein. CwpA                                      |
| 122889 | 8.01  | 0.14 | 2.83  | 0.17 | 6.59  | 0.33 | 36.228 down | 2.689 down | 0.00 | 195.06  | unknown protein                                              |
| 122941 | 9.63  | 0.11 | 8.78  | 0.01 | 11.38 | 0.25 | 1.806 down  | 3.349 up   | 0.00 | 129.57  | unique secreted protein with CFEM domain                     |
| 122974 | 11.25 | 0.14 | 10.95 | 0.01 | 10.07 | 0.24 | 1.233 down  | 2.272 down | 0.00 | 29.73   | unknown protein                                              |
| 122992 | 9.74  | 0.08 | 8.52  | 0.10 | 11.09 | 0.23 | 2.333 down  | 2.545 up   | 0.00 | 126.36  | GT 31 $\beta$ -glycosyltransferase                           |
| 122994 | 12.28 | 0.17 | 11.93 | 0.00 | 11.25 | 0.11 | 1.279 down  | 2.043 down | 0.00 | 61.14   | unknown protein                                              |
| 122995 | 8.00  | 0.04 | 8.16  | 0.17 | 6.75  | 0.55 | 1.115 up    | 2.386 down | 0.03 | 9.42    | unknown protein                                              |
| 123009 | 12.53 | 0.02 | 14.10 | 0.06 | 13.90 | 0.23 | 2.980 up    | 2.582 up   | 0.00 | 48.38   | glutamine synthetase                                         |
| 123019 | 11.07 | 0.05 | 10.70 | 0.09 | 9.89  | 0.20 | 1.298 down  | 2.272 down | 0.00 | 41.46   | unknown protein                                              |
| 123029 | 13.53 | 0.10 | 13.11 | 0.20 | 10.84 | 0.35 | 1.339 down  | 6.480 down | 0.00 | 75.95   | Cu <sup>2+</sup> /Zn <sup>2+</sup> superoxide dismutase SOD1 |
| 123039 | 12.74 | 0.09 | 12.70 | 0.20 | 13.93 | 0.06 | 1.031 down  | 2.278 up   | 0.00 | 130.26  | HFBs                                                         |
| 123079 | 11.06 | 0.07 | 13.99 | 0.02 | 14.34 | 0.22 | 7.591 up    | 9.716 up   | 0.00 | 244.91  | short chain dehydrogenase/reductase                          |
| 123084 | 9.38  | 0.02 | 8.38  | 0.11 | 8.34  | 0.27 | 1.995 down  | 2.052 down | 0.01 | 16.78   | chloroperoxidase                                             |
| 123086 | 6.32  | 0.11 | 6.77  | 0.12 | 13.89 | 0.15 | 1.367 up    | 190.175 up | 0.00 | 2760.75 | SSCRP                                                        |
| 123095 | 6.80  | 0.30 | 8.33  | 0.03 | 5.43  | 0.42 | 2.880 up    | 2.588 down | 0.00 | 46.56   | unique protein                                               |
| 123120 | 10.85 | 0.28 | 11.11 | 0.07 | 12.01 | 0.18 | 1.200 up    | 2.241 up   | 0.00 | 30.89   | unknown protein. 8 TM                                        |
| 123149 | 9.34  | 0.07 | 7.99  | 0.34 | 7.72  | 0.21 | 2.559 down  | 3.075 down | 0.00 | 36.14   | unknown protein                                              |
| 123180 | 10.82 | 0.10 | 11.15 | 0.06 | 11.94 | 0.33 | 1.257 up    | 2.173 up   | 0.02 | 14.43   | Seryl-tRNA synthetase. class IIa.                            |
| 123191 | 12.70 | 0.05 | 12.66 | 0.11 | 14.06 | 0.12 | 1.029 down  | 2.562 up   | 0.00 | 165.16  | unknown protein                                              |
| 123199 | 9.46  | 0.08 | 11.23 | 0.02 | 12.00 | 0.56 | 3.404 up    | 5.813 up   | 0.01 | 22.62   | SSCRP                                                        |
| 123204 | 12.33 | 0.08 | 13.99 | 0.03 | 13.74 | 0.05 | 3.159 up    | 2.647 up   | 0.00 | 646.36  | lipase/esterase                                              |
| 123205 | 5.51  | 0.02 | 5.47  | 0.26 | 6.97  | 0.23 | 1.029 down  | 2.750 up   | 0.00 | 47.08   | unknown protein                                              |
| 123207 | 12.43 | 0.09 | 14.15 | 0.05 | 13.93 | 0.11 | 3.296 up    | 2.828 up   | 0.00 | 206.34  | unknown protein                                              |
| 123226 | 12.64 | 0.12 | 10.99 | 0.08 | 9.60  | 0.27 | 3.145 down  | 8.238 down | 0.00 | 130.71  | GH37 $\alpha$ -trehalase                                     |
| 123227 | 9.49  | 0.03 | 9.24  | 0.13 | 8.12  | 0.15 | 1.187 down  | 2.591 down | 0.00 | 92.98   | unknown protein                                              |

|        |       |      |       |      |       |      |             |             |      |         |                                                                                   |
|--------|-------|------|-------|------|-------|------|-------------|-------------|------|---------|-----------------------------------------------------------------------------------|
| 123232 | 10.75 | 0.20 | 6.77  | 0.05 | 14.31 | 0.26 | 15.789 down | 11.782 up   | 0.00 | 784.21  | GH12 endo- $\beta$ -1.4-glucanase                                                 |
| 123236 | 7.67  | 0.06 | 7.96  | 0.16 | 9.26  | 0.41 | 1.222 up    | 3.011 up    | 0.01 | 19.97   | SSCRP                                                                             |
| 123256 | 7.44  | 0.13 | 8.56  | 0.08 | 8.61  | 0.24 | 2.168 up    | 2.251 up    | 0.01 | 25.23   | unknown protein                                                                   |
| 123262 | 10.49 | 0.17 | 9.91  | 0.03 | 8.48  | 0.23 | 1.494 down  | 4.007 down  | 0.00 | 82.06   | unique protein. HTG. amidase domain. 1 TM                                         |
| 123265 | 10.92 | 0.08 | 11.77 | 0.01 | 12.14 | 0.40 | 1.801 up    | 2.330 up    | 0.03 | 10.28   | unknown protein                                                                   |
| 123274 | 12.85 | 0.29 | 10.35 | 0.08 | 10.70 | 0.04 | 5.664 down  | 4.439 down  | 0.00 | 201.71  | Aldehyde dehydrogenase                                                            |
| 123278 | 4.56  | 0.35 | 5.46  | 0.34 | 6.17  | 0.35 | 1.875 up    | 3.054 up    | 0.01 | 14.69   | unknown protein                                                                   |
| 123282 | 8.45  | 0.13 | 7.38  | 0.30 | 6.72  | 0.27 | 2.097 down  | 3.305 down  | 0.00 | 30.89   | unknown protein                                                                   |
| 123325 | 9.39  | 0.19 | 10.46 | 0.03 | 10.74 | 0.23 | 2.108 up    | 2.548 up    | 0.00 | 31.56   | zinc transporter                                                                  |
| 123396 | 7.30  | 0.23 | 7.27  | 0.26 | 8.97  | 0.53 | 1.023 down  | 3.179 up    | 0.01 | 14.81   | unknown protein                                                                   |
| 123441 | 9.28  | 0.01 | 10.54 | 0.33 | 10.49 | 0.33 | 2.384 up    | 2.308 up    | 0.02 | 12.78   | unknown protein                                                                   |
| 123455 | 9.11  | 0.08 | 9.06  | 0.03 | 7.76  | 0.37 | 1.035 down  | 2.549 down  | 0.01 | 21.40   | unknown protein                                                                   |
| 123473 | 11.89 | 0.04 | 9.96  | 0.02 | 8.04  | 0.15 | 3.810 down  | 14.364 down | 0.00 | 761.02  | MFS permease                                                                      |
| 123475 | 14.92 | 0.06 | 14.31 | 0.13 | 13.02 | 0.55 | 1.527 down  | 3.709 down  | 0.02 | 14.47   | cell wall Thr-rich mannoprotein. Distantly related to <i>S. cerevisiae</i> Dan4p. |
| 123476 | 8.74  | 0.04 | 8.61  | 0.06 | 11.31 | 0.34 | 1.094 down  | 5.959 up    | 0.00 | 98.04   | unknown protein                                                                   |
| 123493 | 12.52 | 0.11 | 12.42 | 0.10 | 10.81 | 0.28 | 1.073 down  | 3.276 down  | 0.00 | 55.30   | Ubiquitin-protein ligase (E3)                                                     |
| 123509 | 9.77  | 0.07 | 10.37 | 0.05 | 7.79  | 0.36 | 1.506 up    | 3.955 down  | 0.00 | 68.32   | Zn2Cys6 transcriptional regulator                                                 |
| 123510 | 10.55 | 0.21 | 10.14 | 0.11 | 7.46  | 0.53 | 1.330 down  | 8.529 down  | 0.00 | 46.60   | Zn2Cys6 transcriptional regulator                                                 |
| 123553 | 8.78  | 0.09 | 10.25 | 0.15 | 9.88  | 0.40 | 2.779 up    | 2.147 up    | 0.02 | 11.79   | short chain dehydrogenase/reductase                                               |
| 123572 | 10.71 | 0.04 | 9.31  | 0.05 | 9.52  | 0.25 | 2.634 down  | 2.278 down  | 0.00 | 32.50   | Phospholipase A2                                                                  |
| 123604 | 12.96 | 0.07 | 13.26 | 0.28 | 13.99 | 0.23 | 1.224 up    | 2.042 up    | 0.01 | 16.69   | Rps24 (family S16) by homology with similar proteins in other fungi.              |
| 123608 | 7.21  | 0.05 | 7.67  | 0.04 | 8.59  | 0.19 | 1.373 up    | 2.603 up    | 0.00 | 65.47   | unique protein                                                                    |
| 123616 | 13.85 | 0.08 | 14.84 | 0.18 | 15.10 | 0.12 | 1.984 up    | 2.365 up    | 0.00 | 60.77   | short unique protein                                                              |
| 123636 | 12.27 | 0.10 | 11.48 | 0.07 | 10.86 | 0.25 | 1.722 down  | 2.658 down  | 0.00 | 33.73   | unknown protein                                                                   |
| 123639 | 3.68  | 0.23 | 6.03  | 0.38 | 5.07  | 0.25 | 5.100 up    | 2.625 up    | 0.00 | 37.05   | GH64 endo-1.3- $\beta$ -glucanase                                                 |
| 123649 | 9.84  | 0.06 | 9.04  | 0.11 | 7.87  | 0.35 | 1.749 down  | 3.910 down  | 0.00 | 36.97   | unique protein                                                                    |
| 123659 | 13.76 | 0.02 | 9.39  | 0.02 | 11.31 | 0.07 | 20.748 down | 5.487 down  | 0.00 | 3163.03 | cell wall protein. instantly related to <i>S. cerevisiae</i> Pir3p.               |
| 123695 | 9.22  | 0.06 | 9.99  | 0.26 | 10.71 | 0.11 | 1.705 up    | 2.807 up    | 0.00 | 68.68   | unknown protein                                                                   |
| 123697 | 13.70 | 0.00 | 12.30 | 0.03 | 11.36 | 0.10 | 2.644 down  | 5.059 down  | 0.00 | 611.63  | Unknown protein                                                                   |
| 123723 | 12.27 | 0.20 | 12.16 | 0.10 | 10.87 | 0.62 | 1.085 down  | 2.645 down  | 0.04 | 7.59    | Arylacetamide deacetylase                                                         |

|        |       |      |       |      |       |      |             |            |      |         |                                                                                      |
|--------|-------|------|-------|------|-------|------|-------------|------------|------|---------|--------------------------------------------------------------------------------------|
| 123732 | 10.92 | 0.04 | 9.08  | 0.12 | 8.72  | 0.16 | 3.583 down  | 4.606 down | 0.00 | 181.52  | unique protein                                                                       |
| 123740 | 13.80 | 0.18 | 13.29 | 0.15 | 12.60 | 0.20 | 1.430 down  | 2.305 down | 0.00 | 29.28   | unknown protein                                                                      |
| 123779 | 9.12  | 0.04 | 9.77  | 0.05 | 7.70  | 0.25 | 1.577 up    | 2.671 down | 0.00 | 88.00   | unique protein                                                                       |
| 123805 | 11.77 | 0.08 | 11.32 | 0.04 | 10.43 | 0.12 | 1.360 down  | 2.531 down | 0.00 | 138.39  | DHBP_synthase.-dihydroxy--butanone -phosphate synthase                               |
| 123806 | 11.98 | 0.00 | 10.38 | 0.10 | 10.07 | 0.43 | 3.020 down  | 3.750 down | 0.01 | 21.98   | GPCR. secretin like                                                                  |
| 123818 | 11.69 | 0.07 | 7.14  | 0.01 | 13.01 | 0.61 | 23.487 down | 2.491 up   | 0.00 | 104.73  | GH11 endo-β-1.4-xylanase XYN2                                                        |
| 123827 | 14.33 | 0.04 | 13.73 | 0.03 | 12.88 | 0.31 | 1.521 down  | 2.737 down | 0.01 | 26.72   | bifunctional catalase/peroxidase                                                     |
| 123850 | 13.38 | 0.04 | 13.73 | 0.12 | 14.50 | 0.10 | 1.270 up    | 2.171 up   | 0.00 | 107.42  | 60s acid ribosomal protein P1 based on homology to corresponding proteins in fungi a |
| 123865 | 11.33 | 0.22 | 13.67 | 0.03 | 12.34 | 0.45 | 5.058 up    | 2.021 up   | 0.01 | 20.81   | Peptidase S8 and S53. subtilisin. kexin. sedolisin                                   |
| 123888 | 12.51 | 0.07 | 11.04 | 0.13 | 10.04 | 0.27 | 2.767 down  | 5.528 down | 0.00 | 83.91   | unknown protein                                                                      |
| 123940 | 4.84  | 0.37 | 3.14  | 0.19 | 10.18 | 1.69 | 3.232 down  | 40.577 up  | 0.01 | 22.82   | GH115 methylgluronoyl esterase CIP2                                                  |
| 123955 | 9.64  | 0.23 | 13.88 | 0.14 | 12.72 | 0.16 | 18.904 up   | 8.468 up   | 0.00 | 330.87  | Epl1/Sm1                                                                             |
| 123967 | 13.79 | 0.07 | 14.14 | 0.06 | 14.96 | 0.16 | 1.272 up    | 2.252 up   | 0.00 | 60.58   | HFB3                                                                                 |
| 123968 | 12.70 | 0.20 | 14.32 | 0.04 | 14.05 | 0.07 | 3.090 up    | 2.561 up   | 0.00 | 140.23  | unknown protein                                                                      |
| 123989 | 14.28 | 0.04 | 11.50 | 0.12 | 15.59 | 0.09 | 6.841 down  | 2.485 up   | 0.00 | 1418.75 | GH7 Cellobiohydrolase CBH1/CEL7a                                                     |
| 123992 | 11.22 | 0.10 | 9.33  | 0.06 | 13.13 | 0.65 | 3.714 down  | 3.757 up   | 0.00 | 38.57   | swollenin                                                                            |
| 123999 | 7.03  | 0.26 | 8.21  | 0.10 | 8.27  | 0.21 | 2.266 up    | 2.361 up   | 0.01 | 26.76   | NADH:flavin oxidoreductase/NADH oxidase                                              |
| 124022 | 9.18  | 0.01 | 6.09  | 0.20 | 10.20 | 0.22 | 8.500 down  | 2.036 up   | 0.00 | 297.26  | Zn2Cys6 transcriptional regulator                                                    |
| 124030 | 10.88 | 0.02 | 10.08 | 0.01 | 9.77  | 0.38 | 1.742 down  | 2.166 down | 0.03 | 9.47    | unknown protein with TIM barrel                                                      |
| 124043 | 3.51  | 0.39 | 3.82  | 0.23 | 6.63  | 0.23 | 1.241 up    | 8.695 up   | 0.00 | 122.71  | GH18. chitinase CHI18-14                                                             |
| 124059 | 12.76 | 0.03 | 10.05 | 0.12 | 13.82 | 0.05 | 6.566 down  | 2.088 up   | 0.00 | 2235.49 | SSCRP                                                                                |
| 124065 | 9.38  | 0.17 | 8.53  | 0.23 | 12.11 | 0.39 | 1.804 down  | 6.623 up   | 0.00 | 98.19   | unknown protein. only in bacteria; contains large nuclear transport factor 2 domain  |
| 124079 | 3.15  | 0.17 | 3.60  | 0.27 | 4.60  | 0.31 | 1.365 up    | 2.734 up   | 0.01 | 21.12   | Multicopper oxidases                                                                 |
| 124104 | 12.47 | 0.05 | 12.16 | 0.09 | 11.17 | 0.29 | 1.247 down  | 2.473 down | 0.01 | 25.86   | unknown protein                                                                      |
| 124115 | 13.54 | 0.15 | 12.82 | 0.13 | 11.26 | 0.08 | 1.640 down  | 4.849 down | 0.00 | 350.81  | phosphoenolpyruvate carboxykinase AcuF                                               |
| 124116 | 10.52 | 0.02 | 10.85 | 0.29 | 9.46  | 0.18 | 1.254 up    | 2.082 down | 0.00 | 42.80   | unknown protein                                                                      |
| 124119 | 11.53 | 0.12 | 11.32 | 0.07 | 9.61  | 0.26 | 1.157 down  | 3.788 down | 0.00 | 73.41   | unique protein                                                                       |
| 124157 | 13.20 | 0.03 | 13.27 | 0.05 | 11.47 | 0.13 | 1.051 up    | 3.312 down | 0.00 | 309.69  | unknown protein                                                                      |
| 124170 | 10.02 | 0.05 | 9.59  | 0.04 | 8.34  | 0.25 | 1.352 down  | 3.206 down | 0.00 | 59.19   | arsenite methyltransferase                                                           |
| 124177 | 13.23 | 0.08 | 12.48 | 0.11 | 11.86 | 0.31 | 1.683 down  | 2.586 down | 0.01 | 21.10   | unknown protein                                                                      |

|        |       |      |       |      |       |      |            |            |      |        |                                                                                        |
|--------|-------|------|-------|------|-------|------|------------|------------|------|--------|----------------------------------------------------------------------------------------|
| 124187 | 9.90  | 0.07 | 10.12 | 0.15 | 11.25 | 0.14 | 1.166 up   | 2.551 up   | 0.00 | 90.56  | ER-associated protein degradation                                                      |
| 124210 | 13.23 | 0.01 | 13.42 | 0.11 | 14.65 | 0.21 | 1.144 up   | 2.673 up   | 0.00 | 62.30  | histone H3                                                                             |
| 124222 | 13.50 | 0.18 | 13.08 | 0.11 | 11.42 | 0.24 | 1.336 down | 4.232 down | 0.00 | 82.95  | CaaX-protease. related to E. nidulans rce1. involved in signal transduction            |
| 124228 | 12.36 | 0.05 | 11.82 | 0.03 | 10.59 | 0.11 | 1.455 down | 3.406 down | 0.00 | 300.48 | GT2 chitin synthase                                                                    |
| 124246 | 9.39  | 0.13 | 9.85  | 0.08 | 10.41 | 0.28 | 1.375 up   | 2.022 up   | 0.02 | 14.02  | unknown protein                                                                        |
| 124249 | 10.65 | 0.17 | 11.83 | 0.09 | 12.52 | 0.38 | 2.271 up   | 3.665 up   | 0.01 | 24.77  | unknown protein                                                                        |
| 124256 | 10.29 | 0.12 | 11.18 | 0.14 | 12.41 | 0.41 | 1.855 up   | 4.359 up   | 0.00 | 30.22  | phospholipase-like protein                                                             |
| 124260 | 9.65  | 0.04 | 9.48  | 0.07 | 8.35  | 0.20 | 1.123 down | 2.464 down | 0.00 | 61.37  | Zn2Cys6 transcriptional regulator                                                      |
| 124278 | 11.40 | 0.01 | 12.33 | 0.04 | 12.90 | 0.28 | 1.907 up   | 2.834 up   | 0.00 | 32.90  | unknown protein with EXS domain                                                        |
| 124283 | 8.92  | 0.11 | 10.62 | 0.00 | 11.80 | 0.27 | 3.244 up   | 7.355 up   | 0.00 | 123.52 | unknown protein. SET and MYND domains                                                  |
| 124286 | 12.19 | 0.09 | 11.84 | 0.07 | 10.97 | 0.21 | 1.274 down | 2.340 down | 0.00 | 40.53  | Heteromeric CCAAT factors                                                              |
| 124295 | 11.87 | 0.00 | 10.23 | 0.20 | 13.46 | 0.18 | 3.114 down | 3.010 up   | 0.00 | 262.78 | SSCRP                                                                                  |
| 124296 | 9.17  | 0.05 | 7.68  | 0.10 | 10.38 | 1.04 | 2.810 down | 2.316 up   | 0.04 | 7.65   | unique protein                                                                         |
| 124299 | 3.13  | 0.08 | 3.23  | 0.35 | 5.31  | 0.33 | 1.069 up   | 4.537 up   | 0.00 | 50.27  | HET-domain protein with WD40 repeats                                                   |
| 124302 | 12.96 | 0.02 | 12.54 | 0.02 | 11.69 | 0.10 | 1.335 down | 2.406 down | 0.00 | 203.45 | response regulator receiver. distantly related to S. cerevisiae Ssk1p and S. pombe Mcs |
| 124310 | 3.05  | 0.45 | 3.63  | 0.04 | 4.94  | 0.36 | 1.497 up   | 3.722 up   | 0.01 | 23.04  | unknown protein                                                                        |
| 124338 | 11.12 | 0.01 | 8.97  | 0.02 | 8.17  | 0.19 | 4.453 down | 7.751 down | 0.00 | 270.02 | unique protein                                                                         |
| 124339 | 5.73  | 0.16 | 6.59  | 0.08 | 7.43  | 0.24 | 1.818 up   | 3.250 up   | 0.00 | 48.41  | unique protein                                                                         |
| 124341 | 11.80 | 0.08 | 12.45 | 0.01 | 9.85  | 0.77 | 1.561 up   | 3.879 down | 0.01 | 15.16  | mating protein MAT1-2-1                                                                |

\* Abbreviations: SEQ-ID, Trire2:number; S.D. standard deviation; "ratio" specifies the expression ratio vs the parent strain. Note that expression levels (but not the ratios) are given as log2 by the ArrayStar evaluation package
