# Supplementary material for: Functional Analyses of Trichoderma reesei LAE1 Reveal Conserved and Contrasting Roles of This Regulator
Source: PubMed Central journal article supplement (PMC3564997; doi:10.1534/g3.112.005140), 2013-02-01
Supplement: supp_3.2.369_TableS3.pdf [file supp_3.2.369_TableS3.pdf]

**Table S3 Comparison of expression results from microarrays and qPCR for selected genes\***

| Trire2: | gene category | array results |               | p-value | qPCR results |               |      |        |
|---------|---------------|---------------|---------------|---------|--------------|---------------|------|--------|
|         |               | <i>Δlae1</i>  | <i>lae1OE</i> |         | <i>Δlae1</i> | <i>lae1OE</i> | S.D. | S.D.   |
| 5647    | PTH           | 3.364 down    | 1.567 down    | 0.00    | 0.73         | ± 0.11        | 0.55 | ± 0.14 |
| 39587   | PTH           | 155.090 down  | 2.883 down    | 0.05    | 0.03         | ± 0.02        | 0.11 | ± 0.04 |
| 62462   | PTH           | 1.475 down    | 2.438 up      | 0.00    | 1.9          | ± 0.87        | 1.8  | ± 0.47 |
| 69904   | PTH           | 4.888 down    | 1.125 up      | 0.00    | 1.3          | ± 0.67        | 1.3  | ± 0.17 |
| 76763   | PTH           | 3.952 down    | 1.267 up      | 0.05    | 0.3          | ± 0.12        | 0.22 | ± 0.18 |
| 82041   | PTH           | 4.287 down    | 1.305 down    | 0.04    | < 0.1        | ND            | 0.45 | ± 0.11 |
| 105224  | PTH           | 2.763 down    | 4.166 down    | 0.07    | 0.15         | ± 0.08        | 0.18 | ± 0.09 |
| 110339  | PTH           | 1.078 down    | 11.197 up     | 0.07    | 3.4          | ± 2.3         | 268  | ± 78.4 |
| 110744  | PTH           | 5.100 down    | 1.514 down    | 0.00    | 0.15         | ± 0.11        | 1.4  | ± 0.12 |
| 121990  | PTH           | 4.330 down    | 1.236 down    | 0.04    | 0.35         | ± 0.23        | 2.2  | ± 1.2  |
| 122824  | PTH           | 10.764 down   | 35.206 up     | 0.00    | 0.22         | ± 0.04        | 81.3 | ± 33.4 |
| 112083  | HET           | 2.453 down    | 2.723 up      | 0.01    | < 0.1        | ND            | 0.3  | ± 0.08 |
| 69187   | HET           | 2.647 down    | 1.827 down    | 0.02    | 0.85         | ± 0.35        | 3    | ± 1.6  |
| 107071  | HET           | 1.412 up      | 3.767 up      | 0.00    | 0.83         | ± 0.42        | 4.6  | ± 1.1  |
| 111494  | HET           | 2.414 down    | 1.882 down    | 0.01    | 0.81         | ± 0.28        | 2.6  | ± 1.4  |
| 23171   | NRPS          | 3.634 up      | 9.894 up      | 0.00    | 1.44         | ± 0.33        | 4.14 | ± 0.51 |

\* values are means of at least 3 replica, S.D. standard deviation
