# Supplementary material for: Functional Analyses of Trichoderma reesei LAE1 Reveal Conserved and Contrasting Roles of This Regulator
Source: PubMed Central journal article supplement (PMC3564997; doi:10.1534/g3.112.005140), 2013-02-01
Supplement: supp_3.2.369_TableS4.pdf [file supp_3.2.369_TableS4.pdf]

**Table S4 Global H3K9 and H3K4 methylation patterns in relation to regulation by LAE1\***

| protein ID | H3K9me3 |              |               | H3K4me2 |              |               | H3K4me3 |              |               | ratio [ <i>Δlae1</i> ] | ratio [ <i>lae1OE</i> ] | Annotation                                                                        |
|------------|---------|--------------|---------------|---------|--------------|---------------|---------|--------------|---------------|------------------------|-------------------------|-----------------------------------------------------------------------------------|
|            | WT      | <i>Δlae1</i> | <i>lae1OE</i> | WT      | <i>Δlae1</i> | <i>lae1OE</i> | WT      | <i>Δlae1</i> | <i>lae1OE</i> |                        |                         |                                                                                   |
| 1673       |         |              |               | +       | +            | +             | +       | +            | +             |                        |                         | Eukaryotic translation initiation factor 4E (eIF-4E)                              |
| 1679       |         |              |               |         | +            |               | +       |              |               |                        |                         | unknown protein                                                                   |
| 1683       |         |              |               | +       | +            | +             | +       | +            | +             |                        |                         | Rap-RAN GTPase activating protein tuberin                                         |
| 1692       |         |              |               | +       | +            | +             | +       | +            | +             |                        |                         | ribosomal protein L23                                                             |
| 1702       |         |              |               | +       | +            | +             | +       | +            | +             |                        |                         | DNA polymerase V (phi)                                                            |
| 1735       |         |              |               | +       | +            | +             | +       | +            | +             |                        |                         | unknown protein                                                                   |
| 1737       |         |              |               |         |              |               |         |              |               |                        |                         | unknown protein                                                                   |
| 1751       |         |              |               |         |              |               |         |              |               |                        |                         | FAD monooxygenase                                                                 |
| 1766       |         |              |               | +       | +            | +             | +       | +            | +             |                        |                         | unknown protein                                                                   |
| 1777       |         |              |               | +       | +            | +             | +       | +            | +             |                        |                         | unknown protein                                                                   |
| 1818       |         |              |               | +       | +            | +             | +       | +            | +             |                        |                         | unknown protein                                                                   |
| 1847       |         |              |               | +       | +            | +             | +       | +            | +             |                        |                         | RNA polymerase II transcription elongation factor (Ctr9)                          |
| 1857       |         |              |               | +       | +            | +             | +       | +            | +             |                        |                         | histone H4                                                                        |
| 1879       |         |              |               | +       | +            | +             | +       | +            | +             |                        |                         | unknown protein with dDENN domain                                                 |
| 1885       |         |              |               |         | +            |               |         |              |               |                        |                         | GH15 glucamylase with starch binding domain                                       |
| 1912       |         |              |               | +       | +            | +             | +       | +            | +             |                        |                         | unknown protein                                                                   |
| 1925       |         |              |               | +       | +            | +             | +       | +            | +             |                        |                         | fatty acid hydroxylase. Cytb5. SUR2-type hydroxylase/desaturase. catalytic region |
| 1927       |         |              |               |         |              |               |         |              |               |                        |                         | unknown protein                                                                   |
| 1935       |         |              |               | +       | +            | +             | +       | +            | +             |                        |                         | unknown protein with DENN domain                                                  |
| 1941       |         |              |               |         |              |               |         |              |               |                        |                         | myb transcriptional regulator                                                     |
| 1947       |         |              |               |         | +            |               |         |              |               |                        |                         | unknown protein                                                                   |
| 1949       |         |              |               |         |              |               |         |              |               |                        |                         | unknown protein                                                                   |
| 1958       |         |              |               |         |              |               |         |              |               |                        |                         | unknown protein. tetratricopeptide repeats                                        |
| 1959       |         |              |               |         |              |               |         |              |               | 1.359 up               | 4.687 up                | Haloacid dehalogenase-like hydrolase                                              |

|      |   |   |   |   |   |   |                |               |                                         |
|------|---|---|---|---|---|---|----------------|---------------|-----------------------------------------|
| 1960 |   |   |   |   |   |   |                |               | unknown protein                         |
| 1977 | + | + | + | + | + | + | 1.106<br>down  | 2.191<br>down | Peptidase_M28                           |
| 1983 | + | + | + | + | + | + |                |               | RNA binding domain protein PUA          |
| 1992 |   |   |   |   |   |   |                |               | metal dependent phosphohydrolase        |
| 1993 | + |   | + |   |   |   | 1.057<br>down  | 2.381<br>down | γ-glutamyl phosphate reductase GPR      |
| 1997 | + | + | + | + | + | + |                |               | kinesin                                 |
| 1999 | + | + | + | + | + | + |                |               | unknown protein                         |
| 2015 |   |   |   |   |   |   |                |               | GCN5-related N-acetyltransferase        |
| 2033 |   |   |   |   |   |   | 2.855<br>down  | 2.205 up      | unknown protein                         |
| 2036 |   |   |   |   |   |   | 1.090<br>down  | 2.856 up      | cysteine peptidase                      |
| 2038 |   |   |   |   |   |   |                |               | Alcohol dehydrogenase. class IV         |
| 2044 |   |   |   |   |   |   |                |               | dipeptidyl peptidase 5                  |
| 2050 | + | + | + | + | + | + |                |               | translation initiation factor eIF-4G    |
| 2068 |   |   |   |   |   |   |                |               | MFS permease                            |
| 2071 | + | + | + | + | + | + | 1.875 up       | 2.266 up      | unknown protein. 5 TM                   |
| 2076 |   |   |   |   |   |   | 13.496<br>down | 8.504<br>down | malate permease                         |
| 2087 | + | + | + | + | + | + |                |               | exosome complex exonuclease RRP43       |
| 2089 |   |   |   |   |   |   |                |               | Rad21/Rec8 like protein. N-terminal     |
| 2091 | + | + | + | + | + | + | 1.604<br>down  | 2.676<br>down | 6-phosphofructokinase                   |
| 2095 | + | + | + | + | + | + |                |               | DNA polymerase delta. catalytic subunit |
| 2096 | + |   | + |   |   |   | 1.637 up       | 3.429<br>down | Zn2Cys6 transcriptional regulator       |
| 2100 |   | + |   |   |   |   |                |               | unknown protein DUF1531                 |
| 2108 | + | + | + | + | + | + |                |               | unknown protein                         |
| 2125 |   |   |   |   |   |   | 1.146 up       | 2.029<br>down | Fructose-2.6-bisphosphatase             |

|      |   |   |   |   |   |   |               |               |                                               |
|------|---|---|---|---|---|---|---------------|---------------|-----------------------------------------------|
| 2148 | + | + | + |   |   |   | 2.133<br>down | 2.651<br>down | Zn2Cys6 transcriptional regulator             |
| 2173 | + | + | + | + |   | + |               |               | unknown protein                               |
| 2185 |   |   | + |   |   |   | 1.764 up      | 7.251 up      | GCN5-related N-acetyltransferase              |
| 2186 |   |   |   |   |   |   |               |               | unknown protein                               |
| 2200 |   |   |   |   |   |   |               |               | short chain dehydrogenase/reductase           |
| 2211 |   |   |   |   |   |   |               |               | Transketolase                                 |
| 2223 |   |   |   |   |   |   | 1.178 up      | 2.618 up      | succinate-CoA ligase. alpha subunit           |
| 2231 |   |   |   |   |   |   |               |               | unknown protein                               |
| 2241 | + | + | + | + | + | + |               |               | WASP-like protein las17p                      |
| 2250 |   |   |   |   |   |   |               |               | GCN5-related N-acetyltransferase              |
| 2268 | + | + | + | + | + | + |               |               | inner centromere protein                      |
| 2269 | + | + | + | + | + | + |               |               | condensin complex component SMC2              |
| 2316 | + | + | + | + | + | + | 3.965<br>down | 4.082<br>down | unknown protein with caleosin domain          |
| 2319 | + | + | + | + | + | + |               |               | unknown protein                               |
| 2322 |   |   |   |   |   |   | 1.344<br>down | 2.612<br>down | unknown protein                               |
| 2343 |   | + |   |   |   |   |               |               | unknown protein                               |
| 2348 |   |   |   |   |   |   |               |               | unknown protein                               |
| 2358 |   |   |   |   |   |   | 1.269<br>down | 2.915<br>down | unknown protein with HIT domain               |
| 2362 |   |   |   |   |   |   |               |               | Zinc-containing alcohol dehydrogenase         |
| 2365 |   | + |   | + |   |   |               |               | Unknown protein                               |
| 2369 |   |   |   |   |   |   |               |               | SNF2 family domain-containing protein         |
| 2373 | + | + | + | + | + | + |               |               | unknown protein                               |
| 2374 | + | + | + | + | + | + |               |               | actin-like protein                            |
| 2384 | + | + | + | + | + | + |               |               | unknown protein                               |
| 2392 | + | + | + | + | + | + | 1.209<br>down | 4.288<br>down | peroxisomal hydratase-dehydrogenase-epimerase |

|      |   |   |   |   |   |   |               |               |                                                                                        |
|------|---|---|---|---|---|---|---------------|---------------|----------------------------------------------------------------------------------------|
| 2399 | + | + | + | + | + | + | 1.056<br>down | 3.210<br>down | unknown protein                                                                        |
| 2433 | + | + | + | + | + | + |               |               | methyltransferase                                                                      |
| 2439 | + | + | + | + | + | + |               |               | Arc15 (N.crassa) ortholog                                                              |
| 2441 | + | + | + | + | + | + |               |               | unknown protein                                                                        |
| 2451 | + | + | + | + | + | + |               |               | Secretion related small GTPase Rab6/Ypt6/Ryh1                                          |
| 2474 | + | + | + | + | + | + |               |               | polyphosphoinositide phosphatase. putative                                             |
| 2476 | + | + | + | + | + | + |               |               | vacuolar ATP synthase subunit D                                                        |
| 2489 |   |   |   |   |   |   | 1.820<br>down | 3.356 up      | Ribonuclease T2                                                                        |
| 2492 |   |   |   |   |   |   | 1.832<br>down | 4.378<br>down | Phosphatidylinositol-4-phosphate 5-kinase                                              |
| 2499 |   |   |   |   |   |   | 1.182 up      | 4.741<br>down | unknown protein                                                                        |
| 2501 |   |   |   |   |   |   |               |               | pyrroline-5-carboxylate reductase                                                      |
| 2508 | + | + | + | + | + | + |               |               | chaperonine Cpn60/TCP1. t-complex protein t. subunit β                                 |
| 2517 |   |   |   |   |   |   | 1.399<br>down | 2.149 up      | Flavoprotein monooxygenase. putative                                                   |
| 2521 |   |   |   |   |   |   |               |               | FAD dependent oxidoreductase                                                           |
| 2529 | + | + | + | + | + | + |               |               | unknown protein with a possible Interpro domain corresponding to ribosomal protein S12 |
| 2537 | + | + | + | + | + | + |               |               | RHO protein GDP dissociation inhibitor                                                 |
| 2540 |   |   |   |   |   |   |               |               | MFS permease                                                                           |
| 2558 | + | + | + | + | + | + |               |               | unknown protein                                                                        |
| 2561 | + | + | + | + | + | + |               |               | Protein transport protein Sec1                                                         |
| 2568 | + | + | + | + | + | + |               |               | unknown protein                                                                        |
| 2570 |   |   |   |   |   |   | 1.448 up      | 2.929 up      | short chain dehydrogenase/reductase                                                    |
| 2574 | + | + | + | + | + | + |               |               | glycerol-3-phosphate dehydrogenase. NAD-dependent                                      |
| 2583 |   |   |   |   |   |   |               |               | Imidazoleglycerol-phosphate synthase subunit H                                         |
| 2591 | + | + | + | + | + | + |               |               | UbiE-like methylase                                                                    |
| 2599 | + | + | + | + | + | + |               |               | unknown protein                                                                        |
| 2629 |   | + |   |   |   |   |               |               | methionine-R-sulfoxide reductase B2                                                    |

|      |   |   |   |   |   |   |               |               |                                                                                      |
|------|---|---|---|---|---|---|---------------|---------------|--------------------------------------------------------------------------------------|
| 2634 | + | + | + | + | + | + |               |               | Erg27 3-keto steroid reductase                                                       |
| 2648 | + | + | + | + | + | + |               |               | Fe(II)/2-oxoglutarate-dependent diunknown proteingenase                              |
| 2660 | + | + | + | + | + | + |               |               | actin-related protein 2/3 complex subunit. putative                                  |
| 2662 | + | + | + | + | + | + |               |               | GH47 $\alpha$ -1.2-mannosidase                                                       |
| 2666 |   |   |   |   |   |   |               |               | Sin4. RNA polymerase II Mediator complex subunit                                     |
| 2676 | + | + | + | + | + | + |               |               | NADH-ubiquinone oxidoreductase 12 kDa subunit                                        |
| 2687 | + | + | + |   |   |   | 4.071<br>down | 3.173<br>down | AAA ATPase                                                                           |
| 2698 | + | + | + |   |   |   |               |               | translocator protein                                                                 |
| 2703 | + | + | + | + | + | + | 1.074 up      | 2.372<br>down | unknown protein                                                                      |
| 2707 |   |   |   |   |   |   |               |               | Cullin family protein                                                                |
| 2716 | + | + | + | + | + | + |               |               | RNA 3'-terminal phosphate cyclase                                                    |
| 2721 | + | + | + | + | + | + |               |               | unknown protein                                                                      |
| 2730 |   |   |   |   |   |   | 1.024<br>down | 2.171<br>down | unknown protein                                                                      |
| 2735 |   |   |   |   |   |   |               |               | GH18 chitinase CHI18-6                                                               |
| 2745 | + | + | + | + | + | + | 1.115<br>down | 2.175<br>down | fumarate hydratase-like protein                                                      |
| 2759 | + | + | + | + | + | + |               |               | HECT-domain-containing protein                                                       |
| 2776 |   |   |   |   |   |   |               |               | acetate non-utilizing protein 9. putative                                            |
| 2790 |   | + |   |   |   |   |               |               | aminoacyl-tRNA synthase.                                                             |
| 2826 | + | + | + | + | + | + |               |               | SNF2-like helicase                                                                   |
| 2829 | + | + | + | + | + | + |               |               | serine/threonine protein kinase                                                      |
| 2830 | + | + | + | + | + | + |               |               | unknown protein                                                                      |
| 2835 | + | + | + | + | + | + | 1.112<br>down | 2.275<br>down | unknown protein                                                                      |
| 2837 | + | + | + | + | + | + |               |               | unknown protein                                                                      |
| 2845 | + | + | + | + | + | + |               |               | G-protein alpha subunit 2 GNA2                                                       |
| 2852 |   |   |   |   |   |   |               |               | unknown protein                                                                      |
| 2869 | + | + | + | + | + | + |               |               | MPE1. zinc knuckle domain-containing protein MPE1 [Verticillium albo-atrum VaMs.102] |

|      |   |   |   |   |   |   |             |            |                                                                 |
|------|---|---|---|---|---|---|-------------|------------|-----------------------------------------------------------------|
| 2902 |   |   |   |   |   |   |             |            | short chain dehydrogenase/reductase                             |
| 2912 | + | + | + | + | + | + |             |            | 3-oxo-5-alpha-steroid 4-dehydrogenase                           |
| 2916 | + | + | + | + | + | + |             |            | unknown protein                                                 |
| 2956 | + | + | + | + | + | + |             |            | HECT domain containing protein (E3 ubiquitin-protein ligase )   |
| 2981 | + | + | + |   |   |   |             |            | citrate lyase. beta subunit                                     |
| 2987 | + | + | + | + | + | + |             |            | cytoplasmic dynein intermediate chain (?)                       |
| 3001 | + | + | + | + | + | + |             |            | nucleolar protein 12                                            |
| 3007 |   |   |   |   |   |   |             |            | transcriptional regulator HMG type                              |
| 3027 | + | + | + | + | + | + |             |            | Pso2 (Snm1). involved in DNA interstrand crosslink repair       |
| 3043 |   |   |   |   |   |   | 1.393 up    | 3.664 up   | SSCRP                                                           |
| 3049 |   |   |   |   |   |   | 1.898 down  | 7.341 down | methionine aminopeptidase                                       |
| 3055 | + |   |   | + |   | + | 22.757 down | 2.485 down | short chain dehydrogenase/reductase                             |
| 3063 |   | + |   |   |   |   |             |            | unknown protein                                                 |
| 3067 | + | + | + | + | + | + |             |            | Chitin synthase export chaperone                                |
| 3094 |   |   |   |   |   |   | 1.265 down  | 2.986 up   | GH30 glucan endo 1.6-β-glucanase                                |
| 3101 | + | + | + | + | + | + |             |            | N-acetylglucosaminyl-phosphatidylinositol deacetylase. putative |
| 3121 |   |   |   |   |   |   | 1.379 up    | 3.066 up   | cytochrome P450 oxidoreductase OrdA-like                        |
| 3129 |   |   |   |   |   |   |             |            | alpha-tubulin suppressor protein Aats1                          |
| 3196 | + | + | + | + | + | + | 1.138 down  | 3.171 down | GH38 α-mannosidase                                              |
| 3208 | + | + | + | + | + | + |             |            | MMR; inhibition of homeologous recombination                    |
| 3212 | + | + | + | + | + | + |             |            | DNA replication licensing factor mcm7                           |
| 3262 |   |   |   |   |   |   | 1.315 up    | 3.244 up   | succinate semialdehyde dehydrogenase (NADP)                     |
| 3267 | + | + | + |   |   |   | 2.019 up    | 3.543 down | MRSP1/expansin-like                                             |
| 3283 |   |   |   |   |   |   |             |            | short-chain dehydrogenase/reductase                             |
| 3287 |   |   |   |   |   |   |             |            | Short-chain dehydrogenase/reductase                             |
| 3292 |   |   |   |   |   |   |             |            | short chain dehydrogenase/reductase                             |

|      |   |  |   |   |   |   |   |   |            |            |                                                   |
|------|---|--|---|---|---|---|---|---|------------|------------|---------------------------------------------------|
| 3310 |   |  | + | + | + | + | + | + |            |            | C2H2 transcriptional regulator                    |
| 3327 |   |  |   |   |   | + |   |   |            |            | NADH:flavin oxidoreductase/NADH oxidase           |
| 3330 |   |  |   |   |   |   |   |   |            |            | MFS permease                                      |
| 3333 |   |  |   |   |   |   |   |   |            |            | Alcohol dehydrogenase zinc-binding domain protein |
| 3340 |   |  | + | + | + | + | + | + |            |            | t-SNARE syntaxin.cis-Golgi                        |
| 3345 |   |  | + | + | + | + | + | + |            |            | splicing factor 3B subunit 10                     |
| 3350 |   |  | + | + | + | + | + | + | 1.265 up   | 2.002 down | phosphopantothenate-cysteine ligase               |
| 3351 |   |  | + | + | + | + | + | + |            |            | unknown protein                                   |
| 3362 |   |  | + | + | + | + | + | + |            |            | Phosphatidylinositol 3- and 4-kinase              |
| 3363 |   |  |   |   |   |   |   |   |            |            | unknown protein. 9 TM                             |
| 3364 |   |  |   |   |   |   |   |   | 1.768 down | 4.386 down | Zinc-containing alcohol dehydrogenase             |
| 3372 |   |  | + |   |   | + |   |   |            |            | IMP-specific 5'-nucleotidase                      |
| 3374 |   |  | + | + | + | + | + | + |            |            | unknown protein                                   |
| 3394 |   |  | + | + | + | + | + | + |            |            | unknown protein                                   |
| 3397 |   |  | + | + | + | + | + | + |            |            | unknown protein                                   |
| 3400 |   |  | + | + | + | + | + | + |            |            | unknown protein                                   |
| 3405 |   |  | + | + | + |   |   | + |            |            | MFS permease                                      |
| 3412 |   |  |   |   |   |   |   |   |            |            | Na <sup>+</sup> /proline symporter PutP           |
| 3419 |   |  | + | + | + | + | + | + |            |            | pre-mRNA-splicing factor SLU7                     |
| 3422 | + |  | + |   |   |   |   |   | 1.166 up   | 4.207 up   | unknown protein with oxidoreductase domain        |
| 3434 |   |  |   |   |   | + | + |   |            |            | unknown protein with patatin domain               |
| 3447 |   |  |   |   |   |   |   |   |            |            | NADP-dependent alcohol dehydrogenase (class V)    |
| 3449 | + |  |   |   |   |   |   |   |            |            | Zn2Cys6 transcriptional regulator                 |
| 3462 |   |  |   |   |   | + |   |   | 1.083 up   | 2.060 down | UreF urease accessory protein                     |
| 3464 |   |  | + | + | + | + | + | + |            |            | acyl-CoA dehydrogenase. putative                  |
| 3481 |   |  |   |   |   |   |   |   | 1.236 down | 2.211 down | unknown protein                                   |

|      |   |   |   |   |   |   |               |               |                                                                      |
|------|---|---|---|---|---|---|---------------|---------------|----------------------------------------------------------------------|
| 3488 | + | + | + | + |   |   | 2.876<br>down | 2.578<br>down | unknown protein                                                      |
| 3501 |   |   |   |   |   |   | 1.227<br>down | 2.035<br>down | unknown protein                                                      |
| 3506 |   |   |   |   |   |   |               |               | 2OG-Fe(II) oxygenase superfamily protein                             |
| 3508 | + | + | + | + | + | + |               |               | unknown protein                                                      |
| 3525 | + | + | + | + | + | + |               |               | TRAPP complex componnet Trs31                                        |
| 3529 |   |   |   |   |   |   | 1.613 up      | 2.586 up      | unknown protein                                                      |
| 3532 |   |   |   |   |   |   |               |               | MFS sugar permease                                                   |
| 3568 | + | + | + | + |   | + | 5.337<br>down | 3.682<br>down | phospholipase A2                                                     |
| 3579 | + | + | + | + | + | + | 1.046 up      | 4.104 up      | ATP-dependent RNA helicases.                                         |
| 3580 |   | + |   |   |   |   |               |               | unknown protein                                                      |
| 3591 | + | + | + | + | + | + |               |               | Formyltetrahydrofolate hydrolase PurU                                |
| 3596 | + | + | + | + | + | + | 1.470<br>down | 2.050 up      | uroporphyrinogen synthase                                            |
| 3600 | + | + | + | + | + | + |               |               | Phosphatidylserine/phosphatidylglycerophosphate/cardiolipin synthase |
| 3605 | + | + | + | + | + | + | 1.377<br>down | 2.431<br>down | Zn2Cys6 transcriptional regulator                                    |
| 3641 |   | + |   |   |   |   |               |               | Cystathionine beta-lyases/cystathionine gamma-synthases              |
| 3645 | + | + | + |   |   |   |               |               | unknown protein with HIT domain                                      |
| 3653 | + | + | + | + | + | + |               |               | 2-oxoglutarate dehydrogenase component E2                            |
| 3662 |   | + |   |   |   |   |               |               | SGT1                                                                 |
| 3671 | + | + | + | + | + | + |               |               | Gar1 protein with RNA-binding region                                 |
| 3707 |   |   |   |   |   |   |               |               | unknown protein with TPR repeat                                      |
| 3716 | + |   | + |   |   |   |               |               | L-PSP endoribonuclease family protein Brt1                           |
| 3717 |   |   |   |   |   |   |               |               | dihydrodipicolinate synthetase. putative                             |
| 3718 |   |   |   |   |   |   |               |               | unknown protein                                                      |
| 3719 |   |   |   |   |   |   |               |               | Flavonol reductase/cinnamoyl-CoA reductase                           |
| 3739 |   |   |   |   |   |   |               |               | GH43 $\beta$ -xylosidase/ $\alpha$ -L-arabinofuranosidase            |
| 3741 |   | + |   |   |   |   |               |               | unknown protein                                                      |



|      |   |   |   |   |   |   |   |   |   |                |                |                                                                                        |
|------|---|---|---|---|---|---|---|---|---|----------------|----------------|----------------------------------------------------------------------------------------|
| 3765 |   |   |   |   |   |   |   |   |   |                |                | MFS permease                                                                           |
| 3779 |   |   |   | + | + | + | + | + | + |                |                | DNA polymerase subunit epsilon                                                         |
| 3783 |   |   |   | + | + | + | + | + | + |                |                | unknown protein                                                                        |
| 3787 |   |   |   |   |   | + |   |   |   |                |                | unknown protein                                                                        |
| 3803 |   |   |   | + | + | + | + | + | + |                |                | mRNA 3'-end-processing protein RNA14. putative                                         |
| 3813 |   |   |   | + | + | + | + | + | + |                |                | unknown protein VanZ like family                                                       |
| 3817 |   |   |   | + | + | + | + | + | + |                |                | ER to golgi transport protein/RAD50-interacting protein 1.                             |
| 3823 |   |   |   |   |   |   |   |   |   |                |                | methionine synthase. vitamin-B12 independent                                           |
| 3824 |   |   |   | + | + | + | + | + | + |                |                | HVA22 domain membrane protein. pathogenicity related                                   |
| 3830 |   |   |   | + | + | + | + | + | + |                |                | MAPKK Bck-1 like MAP kinase kinase. involved in response to osmotic and temperature st |
| 3835 | + | + | + | + | + | + | + | + | + | 1.002<br>down  | 3.172<br>down  | 3-ketoacyl-CoA thiolase                                                                |
| 3847 |   |   |   | + | + | + |   |   |   |                |                | unknown protein                                                                        |
| 3856 |   |   |   | + | + | + | + | + | + |                |                | copper fist DNA-binding domain-containing protein                                      |
| 3873 |   |   |   | + | + | + |   |   |   |                |                | cAMP phosphodiesterase class II PDE1. low affinity                                     |
| 3889 |   |   |   | + | + | + | + | + | + | 1.099<br>down  | 2.382<br>down  | unknown protein                                                                        |
| 3891 |   |   |   | + | + |   |   |   |   |                |                | unknown protein                                                                        |
| 3892 |   |   |   | + | + | + | + | + | + |                |                | importin β KapM                                                                        |
| 3909 |   |   |   | + | + | + | + | + | + | 1.710 up       | 2.528 up       | Mitochondrial ribosomal protein L43                                                    |
| 3914 |   |   |   |   |   |   |   |   |   | 11.485<br>down | 14.492<br>down | Endoplasmic reticulum protein EP58                                                     |
| 3918 |   |   |   | + | + | + | + | + | + |                |                | unknown protein                                                                        |
| 3949 |   |   |   | + | + | + | + | + | + |                |                | Myb. DNA-binding                                                                       |
| 3976 |   |   |   | + | + | + | + | + | + |                |                | unknown protein                                                                        |
| 3984 |   |   |   | + | + | + | + | + | + |                |                | increased rDNA silencing protein 4                                                     |
| 3987 |   |   |   | + | + | + | + | + | + |                |                | unknown protein. only in fungi                                                         |
| 4004 |   |   |   | + | + | + | + | + | + |                |                | FACT complex subunit pob3                                                              |
| 4009 |   |   |   | + | + | + | + | + | + |                |                | lactate/malate dehydrogenase                                                           |
| 4027 |   |   |   | + | + | + |   |   |   |                |                | GT25 b-glycosyltransferases                                                            |

|      |   |   |   |   |   |   |               |               |                                                    |
|------|---|---|---|---|---|---|---------------|---------------|----------------------------------------------------|
| 4040 | + | + | + | + | + | + | 1.353<br>down | 2.187<br>down | RNA polymerase Rpc34 subunit                       |
| 4064 | + | + | + | + | + | + | 1.267 up      | 3.025 up      | Threonine dehydratase                              |
| 4069 | + | + | + | + | + | + | 1.008<br>down | 2.480<br>down | AMP-dependent synthetase and ligase                |
| 4097 | + | + | + |   |   |   |               |               | unknown protein                                    |
| 4104 |   |   |   |   |   |   |               |               | Arginase SpeB                                      |
| 4109 | + | + | + |   |   |   | 1.204 up      | 2.228<br>down | Aspartate/tyrosine/aromatic aminotransferase       |
| 4114 |   |   |   |   |   |   | 8.272<br>down | 2.337<br>down | FAD linked oxidase                                 |
| 4117 | + | + | + |   |   |   |               |               | alpha-aminoadipate reductase lys2                  |
| 4124 |   |   |   |   |   |   | 19.177 up     | 11.315 up     | myb transcriptional regulator                      |
| 4146 |   |   |   |   |   |   |               |               | flavoprotein monooxygenase                         |
| 4152 | + | + | + | + | + | + |               |               | GMP synthase GuA                                   |
| 4154 | + | + | + | + | + | + |               |               | unknown protein                                    |
| 4170 | + | + | + | + | + | + |               |               | unknown proteiun with WD repeats                   |
| 4171 |   |   |   |   |   |   | 9.788<br>down | 2.519<br>down | calcium transporter                                |
| 4179 |   |   |   |   |   |   |               |               | isoflavone reductase family protein                |
| 4196 | + | + | + | + | + | + |               |               | Vacuolar ATP synthase 20 kDa proteolipid subunit   |
| 4213 |   |   |   |   |   |   |               |               | ribonuclease T2                                    |
| 4221 |   |   |   |   |   |   |               |               | unknown protein                                    |
| 4231 | + | + | + | + | + | + |               |               | GATA type transcriptional regulator                |
| 4240 |   |   |   |   |   |   | 8.960<br>down | 9.188<br>down | stress response protein Rds1; secreted             |
| 4244 | + | + | + | + | + | + |               |               | unknown protein with DEAD/DEAH box helicase domain |
| 4265 | + | + | + | + | + | + |               |               | ribonuclease HI (RNaseH).                          |
| 4284 | + | + | + | + | + | + |               |               | ribosomal protein L3                               |
| 4290 | + | + | + | + | + | + |               |               | unknown protein                                    |
| 4294 | + | + | + | + | + | + |               |               | pre-rRNA processing protein Rrp12                  |

|      |   |   |   |   |   |   |               |               |                                                              |
|------|---|---|---|---|---|---|---------------|---------------|--------------------------------------------------------------|
| 4308 | + | + | + | + | + | + | 1.717<br>down | 2.021<br>down | Aminopeptidase N                                             |
| 4366 |   |   |   |   |   |   |               |               | unknown protein                                              |
| 4370 |   |   |   |   |   |   |               |               | ER membrane protein.                                         |
| 4373 |   |   |   |   |   |   |               |               | glutaredoxin domain-containing protein                       |
| 4421 |   |   |   |   |   |   |               |               | unknown protein                                              |
| 4422 | + | + | + | + | + | + |               |               | unknown protein                                              |
| 4426 |   |   |   |   |   |   |               |               | unknown protein                                              |
| 4428 | + | + | + | + | + | + | 1.234<br>down | 2.098<br>down | unknown protein. TPR domain                                  |
| 4430 |   |   |   |   |   |   |               |               | Developmental regulatory protein WetA                        |
| 4442 | + |   |   |   |   |   | 2.342<br>down | 3.378<br>down | SAM-dependent methyltransferase                              |
| 4454 | + | + |   |   |   |   |               |               | unknown protein. secreted                                    |
| 4475 |   |   |   |   |   |   |               |               | NAD dependent epimerase dehydratase family protein. putative |
| 4479 | + | + | + | + | + | + | 1.597 up      | 2.318 up      | small nuclear ribonucleoprotein Sm D2                        |
| 4480 | + | + | + | + | + | + |               |               | dihydroxacetone kinase Dak1                                  |
| 4484 |   |   |   |   |   |   |               |               | GCN5-N-acetyltransferase activity                            |
| 4494 |   |   |   |   |   |   | 1.224<br>down | 3.085<br>down | unknown protein                                              |
| 4508 | + | + | + | + | + | + |               |               | GPCR. related to N. crassa Stm1-like GPR-6                   |
| 4514 |   |   |   |   |   |   |               |               | SSCRP                                                        |
| 4517 |   |   |   |   |   |   | 2.027 up      | 14.425 up     | Cytochrome P450 CYP4/CYP19/CYP26 subfamilies                 |
| 4526 | + | + | + |   | + |   |               |               | unknown protein. only in ascomycota                          |
| 4536 | + | + | + | + | + | + |               |               | unknown protein                                              |
| 4537 | + | + | + | + | + | + |               |               | alanyl-tRNA synthetase. class IIc.                           |
| 4558 | + | + | + | + | + | + |               |               | unknown protein                                              |
| 4561 | + | + | + | + |   | + | 2.718<br>down | 2.569<br>down | GT $\alpha$ -1.6-mannosyltransferase                         |
| 4592 |   |   |   |   |   |   |               |               | F-box domain-containing protein                              |
| 4622 | + | + | + | + | + | + |               |               | thymidylate synthase                                         |

|      |   |   |   |   |   |   |                 |               |                                                 |
|------|---|---|---|---|---|---|-----------------|---------------|-------------------------------------------------|
| 4626 | + | + | + |   |   |   | 2.627<br>down   | 5.010<br>down | unknown protein. C2 domain                      |
| 4654 | + | + | + | + | + | + |                 |               | Histidinol dehydrogenase                        |
| 4659 | + | + | + | + | + | + |                 |               | unknown protein                                 |
| 4663 | + | + | + | + | + | + |                 |               | unknown protein                                 |
| 4668 | + | + | + | + | + | + |                 |               | cytochrome c oxidase assembly protein           |
| 4677 |   | + |   |   |   |   | 1.045<br>down   | 2.710<br>down | unknown protein                                 |
| 4682 | + | + | + | + | + | + |                 |               | short chain dehydrogenase/reductase             |
| 4694 | + | + | + | + | + | + |                 |               | unknown protein                                 |
| 4705 | + | + | + | + | + | + |                 |               | Stress response protein UspA                    |
| 4707 | + | + | + | + | + | + |                 |               | E3 ubiquitin-protein ligase. IQ and HECT domain |
| 4721 | + | + | + | + | + | + |                 |               | mitochondrial Rho GTPase1                       |
| 4726 |   |   |   |   |   |   | 1.022<br>down   | 2.629<br>down | Cytochrome P450 monooxygenase                   |
| 4737 |   |   |   |   |   |   | 2.471<br>down   | 3.457<br>down | arylamine N-acetyltransferase 1                 |
| 4744 |   |   |   |   |   |   |                 |               | transaldolase                                   |
| 4748 | + | + | + | + | + | + | 1.042<br>down   | 2.213<br>down | C2H2 transcription factor                       |
| 4751 | + | + | + | + | + | + |                 |               | CDC24. rho-family GTPase                        |
| 4767 | + | + | + | + | + | + |                 |               | biotin synthase                                 |
| 4774 |   |   |   |   |   |   |                 |               | MFS permease                                    |
| 4791 |   | + | + | + | + | + |                 |               | unknown protein                                 |
| 4843 | + | + | + | + | + | + |                 |               | Carbon-nitrogen hydrolase                       |
| 4847 | + | + | + | + | + | + | 1.229<br>down   | 2.232<br>down | unknown protein                                 |
| 4851 | + |   | + | + |   | + | 194.650<br>down | 3.832<br>down | unknown protein                                 |
| 4860 | + | + | + | + | + | + |                 |               | Siroheme synthase CysG                          |
| 4862 |   | + | + |   |   |   |                 |               | unknown protein                                 |

|      |   |   |   |   |   |   |               |               |                                                                                           |
|------|---|---|---|---|---|---|---------------|---------------|-------------------------------------------------------------------------------------------|
| 4875 | + | + | + | + | + | + | 1.521<br>down | 4.324<br>down | carboxy-cis.cis-muconate cyclase                                                          |
| 4876 | + | + | + | + |   |   | 2.534<br>down | 5.033<br>down | catechol dioxygenase                                                                      |
| 4878 | + | + | + | + | + | + |               |               | ubiquinol-cytochrome c reductase complex 17 kd protein. putative                          |
| 4885 | + | + | + |   |   |   |               |               | Zn2Cys6 transcriptional regulator                                                         |
| 4886 |   |   |   |   |   |   |               |               | unknown protein                                                                           |
| 4901 | + | + | + | + | + | + |               |               | cytochrome c oxidase assembly protein COX16. putative                                     |
| 4905 | + | + | + |   | + |   | 3.713 up      | 2.852 up      | unknown protein                                                                           |
| 4913 |   | + |   |   |   |   |               |               | WD repeat domain-containing phosphoinositide-interacting protein                          |
| 4915 | + | + | + | + | + | + |               |               | dynein light intermediate chain (DLIC).                                                   |
| 4921 | + | + | + |   |   |   | 1.338<br>down | 2.114<br>down | C2H2 transcriptional regulator                                                            |
| 4933 | + | + | + | + | + | + |               |               | bHLH transcriptional regulator                                                            |
| 4936 |   |   |   |   |   |   |               |               | unknown protein                                                                           |
| 4939 |   | + |   |   |   |   |               |               | DNA repair and TFIIH regulator. required for both nucleotide excision repair and RNA poly |
| 4941 | + | + | + | + | + | + | 1.301<br>down | 7.840<br>down | phenylacetyl-CoA ligase.                                                                  |
| 4945 | + | + | + | + | + | + | 1.121 up      | 2.001<br>down | MAPKKK mitogen activated protein kinase kinase kinase Ste11                               |
| 4947 | + | + | + | + | + | + |               |               | TRAPP complex component Trs20                                                             |
| 4950 |   |   |   |   |   |   | 1.291<br>down | 2.153<br>down | urea transporter                                                                          |
| 4952 |   |   |   |   |   |   | 2.137<br>down | 2.872 up      | unknown protein                                                                           |
| 4981 | + | + | + | + | + | + |               |               | dihydrunknown protein-acid dehydratase                                                    |
| 4982 | + | + | + | + | + | + |               |               | ATP-dependent Clp protease proteolytic subunit                                            |
| 4989 | + | + | + | + | + | + |               |               | histone acetyltransferase                                                                 |
| 4990 |   |   |   |   |   |   |               |               | short chain dehydrogenase/reductase                                                       |
| 4996 | + | + | + | + | + | + |               |               | unknown protein                                                                           |
| 4999 |   |   |   |   |   |   | 16.108 up     | 10.569 up     | cytochrome P450 monooxygenase                                                             |

|      |   |   |   |   |   |   |            |             |                                                                                                 |
|------|---|---|---|---|---|---|------------|-------------|-------------------------------------------------------------------------------------------------|
| 5000 |   |   |   |   |   |   | 1.974 up   | 3.348 up    | MFS permease                                                                                    |
| 5007 |   |   |   |   |   |   |            |             | unknown protein                                                                                 |
| 5011 | + | + | + | + | + | + |            |             | SSCRP                                                                                           |
| 5013 | + | + | + | + | + | + |            |             | unknown protein                                                                                 |
| 5016 |   |   | + |   |   |   |            |             | unknown secreted protein. only in Gibberella. Magnaporthe. Chaetomium and rats (!)              |
| 5026 |   |   |   |   |   |   | 2.634 up   | 3.969 up    | SSCRP                                                                                           |
| 5041 | + | + | + | + | + | + |            |             | transcriptional regulator. unknown                                                              |
| 5048 | + | + | + | + | + | + |            |             | unknown protein                                                                                 |
| 5058 | + | + | + | + | + | + |            |             | unknown protein                                                                                 |
| 5063 | + | + | + | + | + | + | 1.647 down | 2.797 down  | unknown protein                                                                                 |
| 5064 |   | + |   |   |   |   |            |             | RNA polymerase III subunitRpc25                                                                 |
| 5066 | + | + | + | + | + | + |            |             | Signal peptidase complex. subunit Spc2. SPC25                                                   |
| 5072 | + | + | + | + | + | + | 1.160 up   | 2.286 up    | unknown protein                                                                                 |
| 5084 |   |   |   |   |   |   | 5.928 down | 19.550 down | conidiation-specific protein 10                                                                 |
| 5088 |   |   |   |   |   |   |            |             | GCN5-related acetyltransferase                                                                  |
| 5091 |   |   |   |   |   |   |            |             | Nitrilase/cyanide hydratase and apolipoprotein N-acyltransferase                                |
| 5095 | + | + | + | + | + | + |            |             | Pre-mRNA-splicing factor ISY1                                                                   |
| 5107 |   |   |   |   |   |   |            |             | ACC deaminase [Trichoderma asperellum]                                                          |
| 5112 |   |   |   |   |   |   |            |             | short chain dehydrogenase/reductase                                                             |
| 5119 |   |   |   |   |   |   |            |             | ferrooxidoreductase                                                                             |
| 5127 |   |   |   |   |   |   |            |             | casein kinase II. alpha subunit. involved in regulation of circadian clock in Neurospora crassa |
| 5135 |   |   |   |   |   |   |            |             | D-arabinono-1.4-lactone oxidase                                                                 |
| 5140 | + | + | + | + | + | + |            |             | Cwf15/Cwc15 cell cycle control                                                                  |
| 5148 | + | + | + | + | + | + |            |             | Cullin (cell cycle)                                                                             |
| 5164 | + | + | + | + | + | + |            |             | unknown protein                                                                                 |
| 5182 |   |   |   |   |   |   | 6.435 down | 4.438 down  | iron-dependent peroxidase                                                                       |
| 5196 | + | + |   |   |   |   | 1.006 up   | 3.749 down  | C-type cyclin                                                                                   |

|      |   |   |   |   |   |   |            |            |                                                         |
|------|---|---|---|---|---|---|------------|------------|---------------------------------------------------------|
| 5202 | + | + | + | + | + | + |            |            | unknown protein                                         |
| 5206 | + |   | + |   |   |   |            |            | pyridine nucleotide-disulphide oxidoreductase AMID-like |
| 5209 | + | + | + | + | + | + |            |            | Secretion related small GTPase Rab11/Ypt3               |
| 5227 | + | + | + | + | + | + |            |            | Isoleucine tRNA synthase.                               |
| 5233 | + | + | + | + | + | + |            |            | Aspartate/otherAminotransferase                         |
| 5247 |   |   | + |   |   |   |            |            | O6-methylguanine alkyltransferase                       |
| 5249 | + | + | + |   |   |   |            |            | fructosamine kinase                                     |
| 5250 | + | + | + | + | + | + |            |            | unknown protein                                         |
| 5270 | + | + | + |   |   |   |            |            | unknown protein                                         |
| 5275 |   |   |   |   |   |   | 1.024 up   | 3.633 down | unknown protein with SET domain                         |
| 5278 |   |   |   |   |   |   |            |            | Ras small GTPase.Rho type                               |
| 5296 |   |   | + |   |   |   | 1.019 down | 2.155 down | DHQase_I. Type I 3-dehydroquinase                       |
| 5308 |   |   |   |   |   |   | 1.050 up   | 2.558 up   | unknown protein                                         |
| 5319 | + | + | + | + | + | + | 1.747 down | 4.094 down | unknown protein                                         |
| 5324 | + | + | + | + | + | + | 1.384 up   | 2.343 up   | Ribosomal protein L14b                                  |
| 5330 |   |   |   |   |   |   | 1.011 down | 2.195 up   | glutathione S-transferase. putative                     |
| 5337 |   |   |   |   |   |   |            |            | γ-glutamyltranspeptidase                                |
| 5345 | + |   | + |   |   | + |            |            | FAD-containing oxidoreductase                           |
| 5347 |   |   |   |   |   |   |            |            | unknown protein                                         |
| 5350 | + | + | + | + | + | + |            |            | SRP receptor. betaSubunit                               |
| 5359 |   |   |   |   |   |   |            |            | unknown protein. Duf1348                                |
| 5363 |   |   |   |   |   |   |            |            | unknown protein                                         |
| 5366 |   |   |   |   |   |   | 1.008 up   | 2.555 down | O-methyltransferase. putative                           |
| 5368 |   |   |   |   |   |   |            |            | short chain dehydrogenase/reductase                     |
| 5369 |   |   |   |   |   |   | 1.250 down | 5.811 up   | Metallocarboxypeptidase. putative                       |

|      |   |   |   |   |   |   |               |               |                                                                                         |
|------|---|---|---|---|---|---|---------------|---------------|-----------------------------------------------------------------------------------------|
| 5371 |   |   |   |   |   |   |               |               | Prolyl 4-hydroxylase. alpha subunit                                                     |
| 5377 | + | + | + | + | + | + |               |               | Ethanolamine-P-transferase GPI11/PIG-F. involved in glycosylphosphatidylinositol anchor |
| 5387 | + | + | + | + | + | + |               |               | NADH-ubiquinone oxidoreductase 24 kDa subunit. mitochondrial                            |
| 5400 | + | + | + | + | + | + |               |               | unknown protein                                                                         |
| 5403 | + | + | + | + | + | + |               |               | enoyl-CoA hydratase/isomerase                                                           |
| 5407 | + | + | + | + | + | + |               |               | unknown protein                                                                         |
| 5431 | + | + | + | + | + | + |               |               | unknown protein                                                                         |
| 5436 | + | + | + | + | + | + |               |               | unknown protein containing major histocompatibility complex                             |
| 5446 |   | + | + |   |   |   |               |               | unknown protein                                                                         |
| 5460 |   | + |   |   |   |   |               |               | unknown protein                                                                         |
| 5466 | + | + | + | + | + | + |               |               | high osmolarity signaling protein Sho1. putative                                        |
| 5502 |   |   |   |   |   |   |               |               | unknown protein                                                                         |
| 5504 | + | + |   |   |   |   |               |               | class I glutamine amidotransferase. putative                                            |
| 5506 | + | + | + | + | + | + |               |               | RNA-binding ATP-dependent helicases.                                                    |
| 5530 | + | + | + | + | + | + | 1.651<br>down | 2.780<br>down | unknown protein                                                                         |
| 5536 | + | + | + | + | + | + |               |               | ankyrin repeat-containing protein                                                       |
| 5578 | + | + | + |   |   |   |               |               | unknown protein                                                                         |
| 5598 | + | + | + | + | + | + |               |               | Endosome-associated ubiquitin isopeptidase                                              |
| 5607 |   |   |   |   |   |   |               |               | unknown protein                                                                         |
| 5610 | + | + | + | + | + | + |               |               | half-sized ABC transporter                                                              |
| 5612 |   |   |   |   |   |   | 2.028<br>down | 2.858<br>down | MFS permease                                                                            |
| 5614 |   |   |   |   |   |   |               |               | unknown protein                                                                         |
| 5633 |   |   |   |   |   |   |               |               | unknown protein                                                                         |
| 5645 | + | + | + | + | + | + |               |               | γ-glutamyltranspeptidase                                                                |
| 5647 |   |   |   |   |   |   |               |               | PTH11 GPCR                                                                              |
| 5651 | + | + | + | + | + | + | 3.222<br>down | 3.328<br>down | unknown protein                                                                         |
| 5656 |   |   |   |   |   |   | 1.057 up      | 2.348<br>down | MFS permease                                                                            |



|      |   |   |   |   |   |   |               |               |                                                                        |
|------|---|---|---|---|---|---|---------------|---------------|------------------------------------------------------------------------|
| 5659 | + | + | + | + |   |   |               |               | pre-mRNA splicing factor. putative [ <i>Cryptococcus neoformans</i> ]. |
| 5664 | + | + | + | + | + | + |               |               | transcriptional regulator APSES type                                   |
| 5675 | + | + | + | + | + | + | 1.130<br>down | 2.106<br>down | C2H2 transcriptional regulator                                         |
| 5710 | + | + | + | + | + | + |               |               | periodic tryptophan protein PWP2                                       |
| 5737 |   |   |   |   |   |   | 1.148 up      | 2.194<br>down | tyrosine/serine protein phosphatase. putative                          |
| 5742 |   | + | + |   |   |   |               |               | unknown protein                                                        |
| 5771 | + | + | + | + | + | + |               |               | Dual specificity phosphatase                                           |
| 5776 | + | + | + | + | + | + | 2.029<br>down | 2.478<br>down | glucose-6-phosphate isomerase                                          |
| 5787 |   |   |   |   |   |   |               |               | Amino acid transporters                                                |
| 5789 |   |   |   |   |   |   |               |               | Cytochrome P450 CYP3/CYP5/CYP6/CYP9 subfamilies                        |
| 5807 |   |   |   |   |   |   | 3.606<br>down | 3.055<br>down | GH95 $\alpha$ -L-fucosidase                                            |
| 5812 |   |   |   |   |   |   |               |               | short chain dehydrogenase/reductase                                    |
| 5818 |   |   |   |   |   |   | 2.086<br>down | 2.049<br>down | DSBA oxidoreductase                                                    |
| 5836 |   |   |   |   |   |   | 2.584 up      | 2.073 up      | GH2 $\beta$ -mannosidase                                               |
| 5844 |   |   |   |   |   |   |               |               | unknown protein                                                        |
| 5847 | + | + | + | + | + | + |               |               | unknown protein                                                        |
| 5849 |   |   |   |   |   |   |               |               | unknown protein. Duf967                                                |
| 5850 | + | + | + | + | + | + |               |               | GCD                                                                    |
| 5855 |   |   |   |   |   |   |               |               | NmrA family protein                                                    |
| 5863 |   |   |   |   |   |   |               |               | enoyl-CoA hydratase/isomerase                                          |
| 5868 | + | + | + | + | + | + |               |               | Single-stranded nucleic acid binding R3H                               |
| 5871 | + | + | + | + | + | + |               |               | unknown protein                                                        |
| 5888 |   |   |   |   |   |   | 1.400<br>down | 2.069 up      | fatty-acid amide hydrolase. putative                                   |
| 5889 |   |   |   |   |   |   | 2.014<br>down | 2.156<br>down | amidase                                                                |

|       |   |  |   |   |   |   |   |               |               |                                            |
|-------|---|--|---|---|---|---|---|---------------|---------------|--------------------------------------------|
| 5890  |   |  |   |   |   |   |   | 1.177<br>down | 2.908 up      | MFS permease                               |
| 5894  |   |  |   |   |   |   |   |               |               | unknown protein                            |
| 5898  |   |  | + | + | + | + | + |               |               | unknown protein                            |
| 5899  |   |  | + | + | + | + | + |               |               | DNA replication licensing factor mcm2      |
| 5912  |   |  | + | + | + | + | + | 1.225<br>down | 2.059<br>down | unknown protein                            |
| 5916  |   |  | + | + | + | + | + |               |               | unknown protein                            |
| 5917  |   |  | + | + | + | + | + |               |               | unknown protein                            |
| 5924  |   |  |   |   |   |   |   |               |               | unknown protein                            |
| 5927  |   |  | + |   |   |   |   |               |               | Zn2Cys6 transcriptional regulator          |
| 5942  |   |  | + | + | + | + | + | 1.845<br>down | 3.665<br>down | unknown protein                            |
| 5970  |   |  |   |   |   |   |   | 4.533<br>down | 6.710<br>down | Amidase                                    |
| 5971  |   |  |   |   |   |   |   |               |               | unknown protein                            |
| 5979  |   |  | + | + | + | + | + |               |               | integral membrane protein (Ptm1). putative |
| 5991  |   |  |   |   |   |   |   |               |               | importin β KapN                            |
| 6005  |   |  |   |   |   |   |   |               |               | MFS permease                               |
| 6011  |   |  | + | + | + | + | + |               |               | unknown protein                            |
| 6014  |   |  | + | + | + | + | + |               |               | unknown protein                            |
| 6015  |   |  | + | + | + | + | + |               |               | RNA polymerase Rpb1                        |
| 6037  | + |  | + | + | + | + | + |               |               | unknown protein                            |
| 6057  |   |  | + | + | + | + | + |               |               | unknown protein                            |
| 6067  |   |  | + | + | + | + | + |               |               | unknown protein                            |
| 6085  |   |  |   |   |   |   |   | 2.362 up      | 2.041 up      | Enoyl-CoA hydratase/isomerase. putative    |
| 6096  |   |  |   |   |   |   |   |               |               | fumarylacetoacetate hydrolase              |
| 6103  |   |  |   |   |   |   |   | 1.179 up      | 2.196 up      | MFS multidrug transporter. putative        |
| 6107  |   |  |   |   |   |   |   |               |               | ferric reductase                           |
| 6108  |   |  | + | + | + |   |   |               |               | SAM-dependent methyltransferase            |
| 21120 |   |  |   |   |   |   |   |               |               | unknown protein                            |

|       |   |   |   |   |   |   |          |            |                                                           |
|-------|---|---|---|---|---|---|----------|------------|-----------------------------------------------------------|
| 21129 |   |   |   |   |   |   |          |            | unknown protein                                           |
| 21135 | + | + | + | + | + | + |          |            | unknown protein                                           |
| 21150 | + | + | + | + | + | + |          |            | unknown protein                                           |
| 21152 | + | + | + | + | + | + | 1.364 up | 2.991 up   | unknown protein                                           |
| 21166 | + | + | + | + | + | + |          |            | Splicing factor motif                                     |
| 21168 | + | + | + | + | + | + |          |            | MAPKK. MAP kinase kinase Mkk1                             |
| 21170 | + | + | + | + | + | + | 1.440 up | 2.300 up   | Ribosomal protein S12                                     |
| 21174 | + | + | + | + | + | + |          |            | myb transcriptional regulator                             |
| 21176 |   |   |   |   |   |   |          |            | Casein kinase (serine/threonine/tyrosine protein kinase)  |
| 21181 | + | + | + | + | + | + |          |            | cell division cycle 37 protein. CDC37                     |
| 21193 | + | + | + | + | + | + |          |            | unknown protein                                           |
| 21198 | + | + | + | + | + | + |          |            | cleavage and polyadenylation specificity factor subunit 5 |
| 21211 | + | + | + | + | + | + |          |            | Forkhead                                                  |
| 21214 | + | + | + | + | + | + |          |            | Sorting nexin-41                                          |
| 21215 | + | + | + | + | + | + |          |            | unknown protein                                           |
| 21221 |   |   |   |   |   |   | 1.044 up | 2.038 down | unknown protein                                           |
| 21226 |   |   |   |   |   |   |          |            | unknown protein                                           |
| 21246 | + | + | + | + | + | + |          |            | Ubiquitin fusion degradation protein Ufd1                 |
| 21249 | + | + | + | + | + | + |          |            | unknown protein                                           |
| 21250 | + | + | + | + | + | + |          |            | AAA family ATPase Rvb2/Reptin. putative                   |
| 21255 | + | + | + | + | + | + |          |            | bHLH transcriptional regulator                            |
| 21256 | + | + | + | + | + | + |          |            | protein phosphatase 2C                                    |
| 21270 | + | + | + | + | + | + |          |            | CAP20 virulence factor                                    |
| 21278 | + | + | + |   |   |   |          |            | unknown protein                                           |
| 21279 | + | + | + | + | + | + |          |            | unknown protein                                           |
| 21288 | + | + | + | + | + | + | 1.035 up | 2.182 down | Vacuolar segregation protein Pep7                         |
| 21293 | + | + | + | + | + | + |          |            | unknown protein                                           |
| 21294 | + | + | + | + | + | + |          |            | rho2                                                      |

|       |   |   |   |   |   |   |            |            |                                                                                            |
|-------|---|---|---|---|---|---|------------|------------|--------------------------------------------------------------------------------------------|
| 21306 | + | + | + | + | + | + |            |            | serine/threonine protein kinase PRP4                                                       |
| 21324 | + | + | + | + | + | + |            |            | protein phosphatase PP2A regulatory subunit A                                              |
| 21327 |   |   |   |   |   |   |            |            | Esterase/lipase/thioesterase                                                               |
| 21330 | + | + | + | + | + | + |            |            | unknown protein                                                                            |
| 21342 | + | + | + | + | + | + | 1.056 up   | 2.204 down | TUL1 Golgi-localized RING-finger ubiquitin ligase (E3)                                     |
| 21345 | + | + | + | + | + | + |            |            | unknown protein                                                                            |
| 21358 | + | + | + | + | + | + |            |            | unknown protein                                                                            |
| 21363 | + | + | + | + | + | + |            |            | Pseudouridylate synthase TruB                                                              |
| 21373 | + | + | + |   |   |   |            |            | germinal center kinase. related to <i>S. cerevisiae</i> Sps1p                              |
| 21384 | + | + | + | + | + | + |            |            | RNA-binding. Ran Zn-finger protein. probably involved in Regulation of Receptor mediated t |
| 21388 | + | + | + | + | + | + |            |            | unknown protein                                                                            |
| 21392 |   | + |   |   |   |   |            |            | Component. nce2. of non-classical secretion pathway; involved in secretion of proteins th  |
| 21396 |   |   |   |   |   |   | 1.497 down | 2.263 down | sugar isomerase                                                                            |
| 21398 | + | + | + | + | + | + |            |            | unknown protein                                                                            |
| 21406 | + | + | + | + | + | + |            |            | phosphoglycerate kinase                                                                    |
| 21407 |   |   |   |   |   |   |            |            | unknown protein                                                                            |
| 21412 | + | + | + | + | + | + | 2.118 down | 2.000 down | unknown protein                                                                            |
| 21415 | + | + | + | + | + | + | 1.989 down | 4.412 down | unknown protein                                                                            |
| 21416 | + | + | + | + | + | + | 1.698 down | 3.251 down | unknown protein                                                                            |
| 21422 | + | + | + | + | + |   | 1.013 down | 3.152 down | MFS permease                                                                               |
| 21425 | + | + | + | + | + | + |            |            | DEAD/DEAH box helicase                                                                     |
| 21426 | + | + | + | + | + | + |            |            | unknown protein                                                                            |
| 21433 | + | + | + | + | + | + |            |            | C2H2 transcriptional regulator                                                             |
| 21435 |   |   |   |   |   |   |            |            | Orotate phosphoribosyl transferase                                                         |
| 21437 | + | + | + | + | + | + |            |            | Spc97 / Spc98 family. spindle pole body                                                    |

|       |   |   |   |   |   |   |               |               |                                                                                         |
|-------|---|---|---|---|---|---|---------------|---------------|-----------------------------------------------------------------------------------------|
| 21440 |   | + | + | + | + | + |               |               | unknown protein                                                                         |
| 21441 |   | + | + | + | + | + |               |               | peroxisomal targeting signal 2 receptor. putative                                       |
| 21442 |   |   |   |   |   |   |               |               | unknown protein                                                                         |
| 21444 |   | + | + | + | + | + |               |               | unknown protein                                                                         |
| 21450 |   |   |   |   |   |   |               |               | aldehyde dehydrogenase                                                                  |
| 21452 |   | + | + | + | + | + |               |               | unknown protein                                                                         |
| 21453 |   | + | + | + | + | + |               |               | ATP-dependent RNA helicase DBP7. putative                                               |
| 21460 |   |   |   |   |   |   |               |               | MMR; HR regulation                                                                      |
| 21461 |   | + | + | + | + | + | 1.270<br>down | 2.003<br>down | ATP-dependent protease La. putative                                                     |
| 21468 |   | + | + | + | + | + |               |               | HFBs                                                                                    |
| 21481 |   |   | + |   |   |   |               |               | CinA Predicted nucleotide-utilizing enzyme related to molybdopterin-biosynthesis enzyme |
| 21498 |   | + | + | + | + | + | 2.221 up      | 3.163 up      | unknown protein                                                                         |
| 21505 |   | + | + | + | + | + | 1.330<br>down | 2.467<br>down | G-protein alpha subunit 3 GNA-3                                                         |
| 21509 |   | + | + | + | + | + |               |               | blue light inducible protein BLI-3                                                      |
| 21534 |   | + | + | + | + | + |               |               | di-trans.poly-cis-decaprenylcistransferase                                              |
| 21535 |   | + | + | + | + | + |               |               | ATP synthase delta subunit                                                              |
| 21542 |   | + | + | + | + | + |               |               | histone acetyltransferase ESA1                                                          |
| 21549 |   | + | + | + | + | + |               |               | tRNA-splicing endonuclease subunit (tRNA-intron endonuclease).                          |
| 21553 |   | + | + | + | + | + |               |               | NADPH-adrenodoxin reductase. putative                                                   |
| 21557 | + | + | + | + | + | + |               |               | chromatin remodelling factors. contains a SWIRM domain and a DNA-binding Myb-domain     |
| 21564 |   | + | + | + | + | + |               |               | unknown protein                                                                         |
| 21571 |   | + | + | + | + | + | 1.253<br>down | 2.019<br>down | unknown protein                                                                         |
| 21576 |   | + | + | + | + | + |               |               | GT $\alpha$ -1.2-mannosyltransferase                                                    |
| 21588 |   | + | + | + | + | + |               |               | endomembrane protein 70                                                                 |
| 21595 |   |   |   |   |   |   | 6.057<br>down | 3.914<br>down | MFS permease                                                                            |
| 21606 |   | + | + | + | + | + |               |               | NADH:ubiquinone oxidoreductase 20.1kD subunit. putative                                 |
| 21609 |   | + | + | + | + | + |               |               | Ubiquinol cytochrome reductase                                                          |

|       |   |   |   |   |   |   |          |            |                                                                                       |
|-------|---|---|---|---|---|---|----------|------------|---------------------------------------------------------------------------------------|
| 21618 |   |   |   |   |   |   |          |            | thioredoxin-like protein                                                              |
| 21633 | + | + | + | + | + | + |          |            | unknown protein                                                                       |
| 21635 |   |   |   |   |   |   |          |            | asparagine synthase-like protein                                                      |
| 21641 | + | + | + | + | + | + |          |            | Pep1/vps10 homolog; transmembrane sorting receptor for vacuolar hydrolases; cycles be |
| 21646 | + | + | + | + | + | + |          |            | Calpactin I heavy chain. calcium ion binding                                          |
| 21649 | + | + | + | + | + | + |          |            | unknown protein                                                                       |
| 21653 |   | + |   |   |   |   |          |            | DNA replication complex GINS protein PSF1. putative                                   |
| 21658 | + | + | + | + | + | + |          |            | Unknown protein                                                                       |
| 21659 | + | + | + | + | + | + |          |            | Dipeptidyl peptidase III. member of MEROPS peptidase family M49 of metallopeptidases; |
| 21663 | + | + | + | + | + | + |          |            | inosine-uridine preferring nucleoside hydrolase                                       |
| 21664 | + | + | + | + | + | + |          |            | unknown protein                                                                       |
| 21668 | + | + | + | + | + | + |          |            | unknown protein                                                                       |
| 21673 | + | + | + | + | + | + |          |            | ATP synthase alpha chain. mitochondrial precursor                                     |
| 21677 | + | + | + | + | + | + |          |            | unknown protein                                                                       |
| 21716 | + | + | + | + | + | + |          |            | Acetate kinase                                                                        |
| 21725 | + | + | + |   | + |   |          |            | GH20 exochitinase                                                                     |
| 21737 | + | + | + | + | + | + |          |            | unknown protein                                                                       |
| 21742 | + | + | + | + | + | + |          |            | Tubulin beta chain 1                                                                  |
| 21743 | + | + | + | + | + | + |          |            | unknown protein                                                                       |
| 21745 |   |   |   |   |   |   |          |            | unknown protein                                                                       |
| 21746 |   |   |   |   |   |   |          |            | carboxymuconolactone decarboxylase. putative                                          |
| 21747 |   |   |   |   |   |   |          |            | unknown protein                                                                       |
| 21749 | + | + | + | + | + | + |          |            | mitogen-activated protein kinase MAF1 . putative                                      |
| 21752 | + | + | + | + | + | + |          |            | unknown protein                                                                       |
| 21758 | + | + | + | + | + | + | 1.165 up | 2.832 down | isocitrate lyase                                                                      |
| 21773 | + | + | + | + | + | + |          |            | mitochondrial import inner membrane translocase subunit tim-14                        |
| 21775 | + | + | + | + | + | + |          |            | unknown protein                                                                       |
| 21782 | + | + | + | + | + | + |          |            | GTP binding protein                                                                   |
| 21784 | + | + | + | + | + | + |          |            | coiled-coil domain-containing protein 55. putative                                    |

|       |   |   |   |   |   |   |               |               |                                                                                            |
|-------|---|---|---|---|---|---|---------------|---------------|--------------------------------------------------------------------------------------------|
| 21798 | + | + | + | + | + | + |               |               | Unknown protein                                                                            |
| 21817 | + | + | + | + | + | + | 1.918<br>down | 2.520<br>down | unknown protein                                                                            |
| 21824 | + | + | + | + | + | + |               |               | MaoC-like peroxisomal dehydratase                                                          |
| 21836 | + | + | + | + | + | + | 1.775<br>down | 4.346<br>down | phosphoglucomutase/phosphomannomutase                                                      |
| 21846 | + | + | + | + | + | + |               |               | unknown protein                                                                            |
| 21873 | + | + | + | + | + | + |               |               | dihydrunknown protein-acid dehydratase                                                     |
| 21876 |   |   |   |   |   |   |               |               | Zinc-binding oxidoreductase                                                                |
| 21890 | + | + | + | + | + | + |               |               | Ribosomal protein L32 based on homology to the corresponding protein in <i>N. crassa</i> . |
| 21900 | + | + | + | + | + | + |               |               | unknown protein                                                                            |
| 21907 | + | + | + | + | + | + |               |               | unknown protein                                                                            |
| 21908 | + | + | + | + | + | + |               |               | fatty acid elongase. 5 TM. GNS1/SUR4 membrane protein                                      |
| 21919 | + | + | + | + | + | + |               |               | unknown protein                                                                            |
| 21924 | + | + | + | + | + | + |               |               | unknown protein                                                                            |
| 21937 | + | + | + | + | + | + |               |               | Heat shock protein DnaJ                                                                    |
| 21953 | + | + | + | + | + | + |               |               | unknown protein                                                                            |
| 21957 | + | + | + | + | + | + |               |               | pyruvate carboxylase (cytosolic)                                                           |
| 21960 | + | + | + |   |   |   | 1.223 up      | 2.842 up      | phospholipase C                                                                            |
| 21971 | + | + | + | + | + | + |               |               | unknown protein                                                                            |
| 21972 | + | + | + | + | + | + |               |               | small nuclear ribonucleoprotein                                                            |
| 21982 | + | + | + | + | + | + |               |               | Epl1/Sm1                                                                                   |
| 21997 |   |   |   |   |   |   |               |               | Zn2Cys6 transcriptional regulator                                                          |
| 22000 |   |   |   |   |   |   |               |               | unknown protein                                                                            |
| 22004 |   | + | + |   |   |   |               |               | D-galacturonic acid reductase                                                              |
| 22005 | + | + | + | + | + | + |               |               | Dolichyl-P-mannose:protein O-mannosyl transferase                                          |
| 22009 |   |   |   |   |   |   |               |               | unknown protein                                                                            |
| 22012 | + | + | + | + | + | + |               |               | unknown protein                                                                            |
| 22013 | + | + | + | + | + | + |               |               | Hsp70 chaperone (BiP). putative                                                            |

|       |   |   |   |   |   |   |            |            |                                                                                             |
|-------|---|---|---|---|---|---|------------|------------|---------------------------------------------------------------------------------------------|
| 22030 | + | + | + | + | + | + | 1.033 up   | 2.442 down | unknown protein                                                                             |
| 22035 | + | + | + |   |   |   | 1.702 down | 2.376 down | unknown protein                                                                             |
| 22050 | + | + | + | + | + | + |            |            | unknown protein                                                                             |
| 22064 | + | + | + | + | + | + | 1.726 down | 3.163 down | DNAJ heat shock family protein                                                              |
| 22072 |   |   |   |   |   |   |            |            | GH63 processing $\alpha$ -glucosidase                                                       |
| 22076 | + | + | + | + | + | + | 1.294 up   | 2.266 up   | lysine decarboxylase                                                                        |
| 22093 | + | + | + | + | + | + | 2.004 down | 6.633 down | Protein farnesyltransferase. alpha subunit                                                  |
| 22104 | + | + | + | + | + | + |            |            | MRP-type ABC transporter                                                                    |
| 22110 |   |   |   |   |   |   |            |            | Flavin-containing monooxygenase                                                             |
| 22115 |   |   |   |   |   |   |            |            | poly polymerase (Poly[ADP-ribose] synthetase)                                               |
| 22117 | + | + | + | + | + | + |            |            | RUM1 repressor of b mating type related genes. possibly involved in fruiting body formation |
| 22119 | + | + | + | + | + | + |            |            | ATP-dependent RNA helicase FAL1                                                             |
| 22129 |   |   |   |   |   |   | 3.396 up   | 3.195 up   | GH61 polysaccharide monooxygenase                                                           |
| 22143 | + | + | + | + | + | + |            |            | unknown protein                                                                             |
| 22148 | + | + | + | + | + | + |            |            | serine palmitoyl CoA transferase subunit-like protein                                       |
| 22153 | + | + | + | + | + | + |            |            | ran-interacting Mog1 protein                                                                |
| 22154 | + | + | + | + | + | + |            |            | AAA ATPase                                                                                  |
| 22164 | + | + | + | + | + | + |            |            | heat shock protein. Hsp40. DnaJ                                                             |
| 22168 |   |   |   |   |   |   | 2.016 down | 2.163 down | unknown protein                                                                             |
| 22181 |   |   |   |   |   |   |            |            | unknown protein                                                                             |
| 22191 | + | + | + | + | + | + |            |            | T-complex protein 1                                                                         |
| 22197 |   | + |   |   |   |   |            |            | GH1 $\beta$ -glucosidase CEL1b                                                              |
| 22201 |   | + | + |   |   |   | 1.223 down | 2.717 down | unknown protein                                                                             |
| 22210 |   |   |   |   |   |   |            |            | Zinc carboxypeptidase                                                                       |
| 22221 | + | + | + | + | + | + |            |            | unknown protein                                                                             |



|       |   |   |   |   |   |   |            |            |                                                                                 |
|-------|---|---|---|---|---|---|------------|------------|---------------------------------------------------------------------------------|
| 22245 | + | + | + | + | + | + |            |            | aureobasidin resistance protein Aur1                                            |
| 22251 | + | + | + | + | + | + | 1.199 up   | 4.105 up   | Mitochondrial carnitine-acylcarnitine carrier protein                           |
| 22252 | + | + | + | + | + | + |            |            | GH47 $\alpha$ -1.2-mannosidase                                                  |
| 22257 | + | + | + | + | + |   |            |            | unknown protein                                                                 |
| 22264 | + | + | + | + | + | + |            |            | AATF-like transcription factor Bfr2                                             |
| 22271 |   |   |   |   |   |   |            |            | Zinc-binding oxidoreductase                                                     |
| 22277 | + | + | + | + | + | + | 2.830 up   | 2.159 up   | sideroflexin-1                                                                  |
| 22283 | + | + | + | + | + | + | 1.179 down | 2.130 down | unknown protein                                                                 |
| 22284 |   |   |   |   |   |   |            |            | unknown protein                                                                 |
| 22287 |   |   |   |   |   |   |            |            | Polyadenylation factor subunit 2. putative                                      |
| 22294 | + | + | + | + | + | + |            |            | Nuclear transport factor 2                                                      |
| 22300 | + | + | + | + | + | + |            |            | vacuolar ATP synthase subunit d                                                 |
| 22314 | + | + | + | + | + | + |            |            | cell division control protein                                                   |
| 22331 |   |   |   |   |   |   |            |            | phospholipase D Active site motif protein / IQ calmodulin-binding motif protein |
| 22332 | + | + | + | + | + | + | 1.838 up   | 2.292 up   | small nuclear ribonucleoprotein E                                               |
| 22341 | + | + | + | + | + | + |            |            | unknown protein                                                                 |
| 22351 | + | + | + | + | + | + | 2.142 up   | 4.051 up   | legume-like lectin                                                              |
| 22365 | + | + | + | + | + | + |            |            | unknown protein                                                                 |
| 22375 | + | + | + | + | + | + |            |            | unknown protein                                                                 |
| 22381 | + | + | + | + | + | + |            |            | calcium/calmodulin-dependent protein kinase                                     |
| 22386 | + | + | + | + | + | + | 1.066 up   | 6.519 up   | Epl1/Sm1                                                                        |
| 22388 |   |   |   |   |   |   | 1.051 up   | 2.048 down | unknown protein                                                                 |
| 22402 | + | + |   |   |   |   |            |            | Peptidase M. neutral zinc metallopeptidases. zinc-binding site                  |
| 22415 | + | + | + | + | + | + |            |            | aldose-1-epimerase                                                              |
| 22417 | + | + | + | + | + | + |            |            | unknown protein                                                                 |
| 22426 |   |   |   |   |   |   | 1.434 down | 2.484 down | unknown protein                                                                 |
| 22453 |   |   |   |   |   |   |            |            | glutathione-S-transferase                                                       |

|       |   |   |   |   |   |   |            |            |                                                          |
|-------|---|---|---|---|---|---|------------|------------|----------------------------------------------------------|
| 22459 |   |   |   |   |   |   | 2.822 up   | 2.322 up   | carboxypeptidase A                                       |
| 22464 |   |   |   |   |   |   | 1.475 down | 7.818 down | Bifunctional P-450:NADPH-P450 reductase                  |
| 22466 | + | + | + | + | + | + |            |            | endomembrane protein 70                                  |
| 22472 | + | + | + | + | + | + |            |            | U2 small nuclear ribonucleoprotein A. putative           |
| 22481 |   |   |   |   |   |   |            |            | cytochrome b2. mitochondrial precursor                   |
| 22484 | + | + | + | + | + | + |            |            | glycolipid transfer protein                              |
| 22489 | + | + | + | + | + | + |            |            | electron transfer flavoprotein domain-containing protein |
| 22492 | + | + | + | + | + | + |            |            | COMPASS complex protein. putative                        |
| 22496 | + | + | + | + | + | + |            |            | unknown protein                                          |
| 22510 | + | + | + |   | + |   |            |            | unknown protein                                          |
| 22512 | + | + | + |   |   |   | 3.243 up   | 7.442 up   | short chain dehydrogenase/reductase                      |
| 22515 |   |   |   |   |   |   |            |            | nucleotide deaminase TAD3                                |
| 22527 | + | + | + | + | + | + |            |            | Dolichyl-P-mannose:protein O-mannosyl transferase        |
| 22528 | + | + | + | + | + | + |            |            | Unknown protein with zinc finger domain.                 |
| 22531 | + | + | + | + | + | + |            |            | Membrane coat complex Retromer. subunit Vps29            |
| 22532 | + | + | + | + | + | + | 1.118 down | 2.049 down | BZIP transcriptional regulator                           |
| 22535 | + | + | + |   |   |   |            |            | Zn2Cys6 transcriptional regulator                        |
| 22538 | + | + | + | + | + | + |            |            | Vacuolar protein sorting-associated protein Vps11        |
| 22559 | + | + | + | + | + | + | 1.385 down | 2.173 down | unknown protein                                          |
| 22560 |   |   |   |   |   |   |            |            | Nucleotide exchange factor Sil1                          |
| 22563 | + | + | + | + | + | + |            |            | unknown protein                                          |
| 22564 | + | + | + | + | + | + |            |            | HFBs                                                     |
| 22573 |   | + | + |   |   |   |            |            | unknown protein                                          |
| 22589 | + | + | + | + | + | + |            |            | unknown protein                                          |
| 22590 |   |   |   |   |   |   |            |            | unknown protein                                          |
| 22598 | + | + | + | + | + | + |            |            | pre-mRNA-processing factor 39                            |
| 22608 | + | + | + | + | + | + |            |            | porin. outer mitochondrial membrane protein              |

|       |   |   |   |   |   |   |            |            |                                                                                        |
|-------|---|---|---|---|---|---|------------|------------|----------------------------------------------------------------------------------------|
| 22611 | + | + | + | + | + | + |            |            | IMP4. an SSU processome componentInvolvedIn pre 18s rRNA processing.                   |
| 22618 | + | + | + | + | + | + |            |            | unknown protein                                                                        |
| 22625 | + | + | + | + | + | + | 1.520 up   | 2.304 up   | Molecular chaperone (DnaJ superfamily)                                                 |
| 22632 | + | + | + | + | + | + |            |            | aconitate hydratase                                                                    |
| 22633 |   |   |   |   |   |   |            |            | S-(hydroxymethyl)glutathione dehydrogenase                                             |
| 22637 | + | + | + |   |   |   |            |            | ERCC8 (CSA. KKN1) involved in transcription-coupled nucleotideExcision repair          |
| 22645 |   |   |   |   |   |   |            |            | cell division cycle protein 23. putative                                               |
| 22647 | + | + | + | + | + | + |            |            | unknown protein                                                                        |
| 22654 |   |   |   |   |   |   | 1.783 down | 4.500 down | monodehydroascorbate reductase                                                         |
| 22660 | + | + | + | + | + | + |            |            | unknown protein                                                                        |
| 22661 | + | + | + | + | + | + |            |            | unknown protein                                                                        |
| 22667 | + | + | + |   |   |   | 1.465 up   | 2.189 up   | pre-rRNA-processing protein IPI1. putative                                             |
| 22678 | + | + | + | + | + | + |            |            | 2OG-Fe(II) oxygenase superfamily protein                                               |
| 22689 | + | + | + | + | + | + |            |            | ribosome biogenesis protein Pescadillo. putative                                       |
| 22694 | + | + | + | + | + | + |            |            | unknown protein                                                                        |
| 22705 |   |   |   |   |   |   | 1.175 up   | 2.255 down | urease                                                                                 |
| 22707 | + | + | + | + | + | + | 1.183 up   | 2.228 up   | unknown protein                                                                        |
| 22712 | + | + | + | + | + | + |            |            | unknown protein                                                                        |
| 22713 | + | + | + | + | + | + |            |            | U5 small nuclear ribonucleoprotein. Contains possible Interpro domain corresponding to |
| 22718 | + | + | + |   |   |   | 1.375 up   | 2.028 up   | Glutaminylpeptide cyclotransferase                                                     |
| 22731 | + | + | + | + | + | + |            |            | autophagy protein Apg6                                                                 |
| 22737 | + | + | + | + | + | + |            |            | unknown protein                                                                        |
| 22739 | + | + | + | + | + | + |            |            | unknown protein                                                                        |
| 22741 | + | + | + | + | + | + | 1.330 down | 2.539 down | unknown protein                                                                        |
| 22752 | + | + | + | + | + | + |            |            | unknown protein                                                                        |
| 22755 | + | + | + | + | + | + |            |            | Zn2Cys6 transcriptional regulator                                                      |
| 22771 |   | + |   |   |   |   |            |            | short chain dehydrogenase/reductase                                                    |

|       |   |   |   |   |   |   |               |               |                                                                                                |
|-------|---|---|---|---|---|---|---------------|---------------|------------------------------------------------------------------------------------------------|
| 22774 | + | + | + | + | + | + |               |               | bHLH transcriptional regulator                                                                 |
| 22783 | + | + | + | + | + | + |               |               | SNF2 family DNA-dependent ATPase                                                               |
| 22785 |   | + |   |   |   |   | 1.166<br>down | 3.150<br>down | C2H2 transcriptional regulator (amdA ?)                                                        |
| 22798 | + | + | + | + | + | + |               |               | Erg19p of <i>Saccharomyces cerevisiae</i> . a mevalonate pyrophosphate decarboxylase in the Er |
| 22799 | + | + | + | + | + | + |               |               | unknown protein                                                                                |
| 22804 | + | + | + | + | + | + |               |               | glutaminyl-trna synthetase.                                                                    |
| 22816 | + | + | + | + | + | + |               |               | NADH dehydrogenase iron-sulfur protein                                                         |
| 22821 | + | + | + | + | + | + |               |               | ribosomal protein L22/17                                                                       |
| 22826 |   |   |   |   |   |   |               |               | PrsA Phosphoribosylpyrophosphate synthetase                                                    |
| 22830 | + | + |   |   |   |   | 1.569<br>down | 2.876<br>down | Glutathione S-transferase                                                                      |
| 22831 |   |   |   |   |   |   |               |               | unknown protein                                                                                |
| 22839 | + |   | + | + |   | + |               |               | translation initiation regulator Gnc20                                                         |
| 22841 | + | + | + | + | + | + | 1.082 up      | 2.560 up      | unknown protein                                                                                |
| 22845 |   | + | + |   |   |   |               |               | ferric reductase                                                                               |
| 22863 | + | + | + | + | + | + |               |               | unknown protein                                                                                |
| 22869 | + | + | + | + | + | + |               |               | unknown protein                                                                                |
| 22874 | + | + | + | + | + | + |               |               | septin-like protein                                                                            |
| 22875 | + | + | + | + | + | + | 1.047<br>down | 3.346<br>down | unknown protein                                                                                |
| 22879 | + | + | + | + | + | + |               |               | unknown protein                                                                                |
| 22881 | + | + | + | + | + | + |               |               | cdc9p ligase                                                                                   |
| 22885 | + | + | + | + | + | + |               |               | ATP11 protein                                                                                  |
| 22891 | + | + | + | + | + | + |               |               | ubiquitin-conjugating enzyme                                                                   |
| 22910 | + | + | + | + | + | + |               |               | GDP-forming succinate-CoA ligase. alpha subunit                                                |
| 22911 | + | + | + | + | + | + |               |               | endonuclease/Exonuclease/phosphatase. putative                                                 |
| 22912 | + |   | + | + |   | + |               |               | MFS permease (glucose permease HXT1)                                                           |
| 22914 | + | + | + | + | + | + |               |               | GH72 $\beta$ -1 3-glucanosyltransferase                                                        |
| 22915 |   |   |   |   |   |   |               |               | glucose oxidase                                                                                |

|       |   |   |   |   |   |   |   |   |   |            |            |                                                         |
|-------|---|---|---|---|---|---|---|---|---|------------|------------|---------------------------------------------------------|
| 22925 |   |   |   | + | + | + | + | + | + |            |            | Zn2Cys6 transcriptional regulator                       |
| 22945 |   |   |   | + | + | + | + | + | + |            |            | uracil phosphoribosyltransferase                        |
| 22950 |   |   |   | + | + | + | + | + | + |            |            | MYND domain protein (SamB)                              |
| 22994 |   |   |   | + | + | + | + | + | + |            |            | AAA-ATPase Cdc48                                        |
| 23001 |   |   |   | + | + | + | + | + | + |            |            | Golgi complex component. cog1                           |
| 23015 |   |   |   | + | + | + | + | + | + |            |            | unknown protein                                         |
| 23028 | + | + | + | + | + | + | + | + | + |            |            | Ca2+ permeable channel. related to N. crassa NCU02762.1 |
| 23034 |   |   |   | + | + | + |   |   |   |            |            | unknown protein                                         |
| 23048 |   |   |   | + | + | + | + | + | + |            |            | unknown protein                                         |
| 23050 |   |   |   | + | + | + | + | + | + |            |            | unknown protein                                         |
| 23059 |   |   |   | + | + | + | + | + | + | 1.461 up   | 2.879 up   | Ribosomal protein L24/L26                               |
| 23062 |   |   |   | + | + | + | + |   |   |            |            | unknown protein                                         |
| 23063 |   |   |   | + | + | + | + | + | + |            |            | Vacuolar protein sorting-associated protein Vps24       |
| 23070 |   |   |   | + | + | + | + | + | + |            |            | unknown protein                                         |
| 23083 |   |   |   |   |   |   |   |   |   | 2.470 up   | 3.030 up   | Flavoprotein monooxygenase                              |
| 23087 |   |   |   |   |   |   |   |   |   |            |            | unknown protein                                         |
| 23090 |   |   |   |   |   |   |   |   |   |            |            | short chain dehydrogenase/reductase                     |
| 23111 |   |   |   | + | + | + | + | + | + |            |            | unknown protein                                         |
| 23115 |   |   |   | + | + | + | + | + | + | 1.866 down | 3.393 up   | expansin                                                |
| 23118 |   |   |   | + | + | + | + | + | + |            |            | unknown protein                                         |
| 23124 |   |   |   | + | + | + | + | + | + | 1.169 up   | 2.158 down | unknown protein                                         |
| 23146 |   |   |   | + | + | + |   |   |   | 1.007 up   | 2.499 up   | unknown protein                                         |
| 23152 |   |   |   |   |   |   |   |   |   | 1.145 down | 2.143 down | unknown LMBR1 domain protein                            |
| 23154 |   |   |   | + | + | + | + | + | + |            |            | transcriptional regulator. unknown                      |
| 23171 |   |   |   |   |   | + |   |   |   | 3.634 up   | 9.894 up   | NRPS                                                    |
| 23173 |   |   |   | + | + | + | + | + | + |            |            | unknown protein                                         |
| 23181 |   |   |   | + | + | + | + | + | + |            |            | unknown protein                                         |

|       |   |   |   |   |   |   |               |          |                                                                     |
|-------|---|---|---|---|---|---|---------------|----------|---------------------------------------------------------------------|
| 23184 | + | + | + | + | + | + |               |          | Isocitrate/isopropylmalate dehydrogenase                            |
| 23190 | + | + | + | + | + | + |               |          | mRNA cleavage factor complex II protein Clp1. putative              |
| 23193 | + | + | + | + | + | + | 1.403<br>down | 2.313 up | importin $\beta$ Kap $\beta$                                        |
| 23200 | + | + | + | + | + | + |               |          | fructose-bisphosphate aldolase                                      |
| 23206 | + | + | + | + | + | + |               |          | 19S regulatory particle ATPase Rpt5                                 |
| 23208 | + | + | + | + | + | + |               |          | eukaryotic ribosome biogenesis protein 1                            |
| 23209 |   |   |   |   |   |   |               |          | 5'-nucleotidase                                                     |
| 23221 | + | + | + | + | + | + |               |          | cation pump. Calcium transport                                      |
| 23228 |   |   |   |   |   |   |               |          | unknown protein Duf1479                                             |
| 23237 | + | + | + | + | + | + |               |          | Methylthioadenosine phosphorylase MTAP                              |
| 23238 |   |   |   |   |   |   |               |          | unknown protein                                                     |
| 23240 |   |   |   |   |   |   |               |          | unknown protein                                                     |
| 23263 | + | + | + | + | + | + |               |          | ADP-ribosylation factor Arf6                                        |
| 23268 |   |   |   |   |   |   |               |          | unknown protein                                                     |
| 23271 | + | + | + | + |   | + | 1.398 up      | 2.713 up | ER-derived vesicles protein Erv41                                   |
| 23276 | + | + | + | + | + | + |               |          | Integral ER membrane protein that regulates phospholipid metabolism |
| 23287 | + | + | + | + | + | + |               |          | unknown protein                                                     |
| 23292 |   |   |   |   |   |   |               |          | Zinc-binding oxidoreductase                                         |
| 23294 | + | + | + | + | + | + |               |          | Zn2Cys6 transcriptional regulator                                   |
| 23295 | + | + | + | + | + | + |               |          | calcium-binding mitochondrial carrier protein Aralar1               |
| 23297 | + | + | + | + | + | + |               |          | unknown protein                                                     |
| 23298 | + | + | + | + | + | + |               |          | Chorismate_syntChorismate synthase                                  |
| 23316 | + | + | + | + | + | + |               |          | Yip1 interacting protein Yop1                                       |
| 23323 | + | + | + | + | + | + |               |          | unknown protein                                                     |
| 23327 | + | + | + | + | + | + |               |          | rRNA methyltransferase                                              |
| 23332 |   |   |   |   |   |   |               |          | unknown protein                                                     |
| 23338 | + | + | + | + | + | + |               |          | unknown protein                                                     |
| 23346 |   |   |   |   |   |   |               |          | GH20 exochitinase                                                   |
| 23347 | + | + | + | + | + | + |               |          | unknown protein                                                     |

|       |   |   |   |   |   |   |               |               |                                                          |
|-------|---|---|---|---|---|---|---------------|---------------|----------------------------------------------------------|
| 23353 |   |   |   |   |   |   |               |               | ferric reductase                                         |
| 23363 | + | + | + | + | + | + |               |               | protein hob3 (involved in cell cycle)                    |
| 23367 | + | + |   |   |   |   |               |               | choline oxidase                                          |
| 23368 | + | + | + |   |   |   |               |               | Flavin-containing monooxygenase                          |
| 23382 |   |   |   |   |   |   |               |               | aldehyde reductase AKR7                                  |
| 23408 |   |   |   |   |   |   |               |               | unknown protein                                          |
| 23413 |   |   |   |   |   |   |               |               | inositol monophosphatase family protein                  |
| 23415 | + | + | + | + | + | + |               |               | amino acid permease Dip5                                 |
| 23417 | + | + | + | + | + | + |               |               | phosphotyrosine protein phosphatase                      |
| 23420 | + | + | + | + | + | + |               |               | prohibitin PHB1                                          |
| 23431 | + | + | + | + | + | + |               |               | Cytochrome bd ubiquinol oxidase. 14 kDa subunit          |
| 23446 | + | + | + | + | + | + |               |               | mitotic spindle checkpoint component mad2                |
| 23452 | + | + | + | + | + | + |               |               | Post-transcriptional gene regulator. RNA-binding protein |
| 23455 |   | + |   |   |   |   |               |               | unknown protein                                          |
| 23458 | + | + | + | + | + |   |               |               | glutathione S-transferase                                |
| 23462 |   |   |   |   |   |   | 1.605<br>down | 2.515<br>down | unknown protein                                          |
| 23475 | + | + | + | + | + | + | 1.594<br>down | 2.142<br>down | Peptidase family M28 protein                             |
| 23489 | + | + | + | + | + | + |               |               | unknown protein                                          |
| 25040 | + | + | + | + | + | + |               |               | Lrg1. expressed in sporulation                           |
| 25159 | + | + | + | + | + | + | 1.924<br>down | 2.060<br>down | PTPc. Protein tyrosine phosphatases (PTP)                |
| 25224 |   |   |   |   |   |   |               |               | GH65 $\alpha$ . $\alpha$ -trehalase                      |
| 25947 | + | + | + | + | + | + |               |               | unknown protein                                          |
| 26019 | + | + | + | + | + | + |               |               | unknown protein                                          |
| 26029 | + | + | + | + | + | + |               |               | ATP-dependent RNA helicase MAK5. putative                |
| 26151 | + | + | + | + | + | + |               |               | unknown protein of Lalv9 family                          |
| 26160 |   |   |   |   |   |   |               |               | unknown protein                                          |
| 26277 | + | + | + | + | + | + |               |               | unknown protein                                          |

|       |   |   |   |   |   |   |               |                |                                                                                 |
|-------|---|---|---|---|---|---|---------------|----------------|---------------------------------------------------------------------------------|
| 26462 | + | + | + | + | + | + |               |                | cAMP-mediated signaling protein SOK1                                            |
| 26575 |   |   |   |   |   |   |               |                | transcriptional regulator, unknown                                              |
| 26598 | + | + | + | + | + | + |               |                | unknown protein                                                                 |
| 26642 |   |   |   |   |   |   | 2.673<br>down | 3.309<br>down  | MFS permease                                                                    |
| 26746 | + | + | + | + | + | + |               |                | unknown protein                                                                 |
| 26787 | + | + | + | + | + | + | 1.036 up      | 2.073<br>down  | ADP-ribosylation factor-binding protein Gga2                                    |
| 26871 |   |   |   |   |   |   | 1.361<br>down | 2.021<br>down  | Zn2Cys6 transcriptional regulator                                               |
| 27020 | + | + | + | + | + | + |               |                | unknown protein                                                                 |
| 27025 | + | + | + | + | + | + |               |                | Protein kinase                                                                  |
| 27042 |   |   |   |   |   |   | 1.852<br>down | 2.192<br>down  | unknown protein                                                                 |
| 27085 | + | + | + | + | + | + |               |                | unknown protein                                                                 |
| 27132 | + | + | + | + | + | + |               |                | unknown protein                                                                 |
| 27181 |   |   |   |   |   |   | 2.740<br>down | 18.345<br>down | MFS permease                                                                    |
| 27219 |   |   |   |   |   |   | 1.966 up      | 2.694 up       | GH27 $\alpha$ -galactosidase                                                    |
| 27259 |   |   |   |   |   |   |               |                | GH27 $\alpha$ -galactosidase                                                    |
| 27357 | + | + | + | + | + | + |               |                | Winged helix repressor DNA-binding                                              |
| 27384 | + | + | + | + | + | + |               |                | SCF E3 ubiquitin ligase complex F-box protein grr1. putative                    |
| 27395 | + | + |   |   |   |   |               |                | GH76 $\alpha$ -1.6-mannanase                                                    |
| 27398 | + | + | + | + | + | + |               |                | origin recognition complex, subunit 2                                           |
| 27406 | + | + | + | + | + | + |               |                | tyrosine-protein phosphatase CDC14                                              |
| 27422 |   |   |   |   |   |   | 2.149 up      | 2.109 up       | RNA helicase DEAD/DEAH box                                                      |
| 27492 | + | + | + | + | + | + |               |                | tRNA pseudouridine synthase.                                                    |
| 27554 |   |   |   |   |   |   |               |                | GH61 polysaccharide monooxygenase                                               |
| 27599 | + | + | + | + | + | + |               |                | cation efflux family protein                                                    |
| 27600 |   | + | + |   |   |   |               |                | Zn2Cys6 transcriptional regulator                                               |
| 27649 | + | + | + | + | + | + |               |                | transcriptional regulator Rme1. repressor of the meiosis regulator protein IME1 |



|       |   |   |   |   |   |   |            |            |                                                                            |
|-------|---|---|---|---|---|---|------------|------------|----------------------------------------------------------------------------|
| 27689 |   |   |   |   |   |   |            |            | MFS permease                                                               |
| 27697 |   |   |   |   |   |   | 1.122 up   | 3.020 down | Amidase                                                                    |
| 27706 |   |   |   |   |   |   |            |            | Cytochrome P450 CYP2 subfamily                                             |
| 27719 | + | + | + | + | + | + |            |            | Glucan synthesis regulatory protein                                        |
| 27722 |   |   |   |   |   |   |            |            | Cytochrome P450 CYP2 subfamily                                             |
| 27770 |   |   |   |   |   |   | 1.439 up   | 6.637 down | MFS permease                                                               |
| 27939 |   |   |   |   |   |   | 1.098 up   | 3.071 down | unknown protein                                                            |
| 27948 | + | + | + | + | + | + |            |            | GPCR. rhodopsin type                                                       |
| 27983 |   |   |   |   |   |   | 1.272 down | 3.331 up   | PTH11 GPCR                                                                 |
| 27992 |   |   |   |   |   |   | 4.000 up   | 3.240 up   | PTH11 GPCR                                                                 |
| 28036 |   |   |   |   |   |   | 4.652 down | 3.610 down | MFS permease                                                               |
| 28050 |   |   |   |   |   |   |            |            | unknown protein                                                            |
| 28159 | + | + | + | + | + | + |            |            | Protoheme IX farnesyltransferase                                           |
| 28185 |   |   |   |   |   |   |            |            | unknown protein. only in Chaetomium. A. oryzae. fumigatus and Streptomyces |
| 28199 | + | + | + | + | + | + |            |            | Mitochondrial import inner membrane translocase subunit tim-50             |
| 28353 |   |   |   |   |   |   |            |            | unknown protein                                                            |
| 28563 |   | + |   |   |   |   |            |            | unknown protein                                                            |
| 28655 | + | + | + | + | + | + |            |            | unknown protein                                                            |
| 28781 |   |   |   |   |   |   |            |            | NDT80/PhoG like DNA-binding domain-containing protein                      |
| 28787 |   |   |   |   |   |   |            |            | unknown protein                                                            |
| 28865 | + | + | + | + |   | + |            |            | unknown protein                                                            |
| 28928 | + | + | + |   |   | + |            |            | PDI related protein Mpd1/PrpA                                              |
| 28975 | + | + | + | + | + | + |            |            | Zn2Cys6 transcriptional regulator                                          |
| 29108 |   | + | + |   |   |   |            |            | Peptidase D                                                                |
| 29115 | + | + | + | + | + | + |            |            | unknown protein                                                            |
| 29142 | + | + | + | + | + | + |            |            | unknown protein                                                            |

|       |   |   |   |   |   |   |            |            |                                                                                     |
|-------|---|---|---|---|---|---|------------|------------|-------------------------------------------------------------------------------------|
| 29220 | + | + | + | + | + | + |            |            | translation initiation factor eIF-2B delta subunit.                                 |
| 29275 | + | + | + | + | + | + | 1.297 up   | 3.219 up   | unknown protein                                                                     |
| 29333 | + | + | + | + | + | + |            |            | RNA binding protein RNP24                                                           |
| 29346 |   |   |   |   |   |   |            |            | phosphatidate-phosphatase                                                           |
| 29439 | + | + | + | + | + | + | 1.808 down | 2.325 down | unknown protein                                                                     |
| 29568 | + | + | + | + | + | + |            |            | C-type cyclin                                                                       |
| 29619 |   |   |   |   |   |   |            |            | Calpactin I heavy chain. calcium ion binding                                        |
| 29642 |   |   |   |   |   |   | 1.468 up   | 3.998 up   | Phosphatidylserine decarboxylase                                                    |
| 29709 | + | + | + | + | + | + |            |            | stomatin-like protein                                                               |
| 29710 | + | + | + | + | + | + | 1.362 down | 3.454 down | unknown protein                                                                     |
| 29713 |   |   |   |   |   |   |            |            | unknown protein                                                                     |
| 29716 | + | + | + | + | + | + |            |            | thiamine-repressible mitochondrial transport protein THI74. putative                |
| 29756 | + | + | + | + | + | + |            |            | UDP-N-acetylglucosamine transporter                                                 |
| 29770 | + | + | + | + |   |   |            |            | unknown protein                                                                     |
| 29932 | + | + | + | + | + | + |            |            | unknown protein                                                                     |
| 29957 | + | + | + | + | + | + |            |            | unknown protein                                                                     |
| 29993 |   |   |   |   |   |   | 1.516 down | 3.465 down | unknown protein                                                                     |
| 30017 |   |   |   |   |   |   |            |            | unknown protein                                                                     |
| 30018 | + | + | + | + | + | + |            |            | unknown protein                                                                     |
| 30068 |   |   |   |   |   |   |            |            | unknown protein                                                                     |
| 30075 |   |   |   |   |   |   |            |            | unknown protein                                                                     |
| 30084 |   |   |   |   |   |   | 2.706 up   | 2.313 up   | unknown protein                                                                     |
| 30144 |   |   |   |   |   |   |            |            | unknown protein                                                                     |
| 30166 |   |   |   |   |   |   | 1.698 down | 6.766 down | unknown protein                                                                     |
| 30214 |   |   |   |   |   |   |            |            | GT glycosyltransferase. related to A. fumigatus capsule polysaccharide biosynthesis |
| 30250 |   | + | + |   |   |   |            |            | N-acetylglucosaminyltransferase                                                     |
| 30274 | + | + | + | + | + | + | 1.148 up   | 3.126 up   | unknown protein                                                                     |

|       |   |   |   |   |   |   |               |               |                                                                                            |
|-------|---|---|---|---|---|---|---------------|---------------|--------------------------------------------------------------------------------------------|
| 30275 | + | + | + | + | + | + |               |               | unknown protein                                                                            |
| 30330 | + | + | + | + | + | + |               |               | unknown protein                                                                            |
| 30455 | + | + | + | + | + | + |               |               | Translocation protein Sec62                                                                |
| 30465 |   |   |   |   |   |   | 1.557<br>down | 2.611 up      | unknown protein. WD-repeats                                                                |
| 30476 | + | + | + | + | + | + |               |               | oxidation resistance protein 1. putative                                                   |
| 30478 | + | + | + | + | + | + |               |               | unknown protein                                                                            |
| 30578 |   |   |   | + |   |   | 1.547<br>down | 4.472<br>down | HhH-GPD family base excision DNA repair protein                                            |
| 30635 | + | + | + | + | + | + |               |               | unknown protein                                                                            |
| 30668 |   |   |   |   |   |   |               |               | short chain dehydrogenase/reductase                                                        |
| 30758 |   |   |   |   |   |   |               |               | unknown protein                                                                            |
| 30759 |   |   |   |   |   |   | 1.892<br>down | 2.654<br>down | zinc containing alcohol dehydrogenase superfamily                                          |
| 30776 |   |   |   |   |   |   | 1.036 up      | 2.281 up      | alpha-ketoglutarate-dependent sulfonate diunknown proteingenzyme                           |
| 30805 | + | + | + | + | + | + |               |               | endonuclease III-like excision repair N-glycosylase involved in the repair of DNA base dam |
| 30969 |   |   |   |   |   |   |               |               | unknown protein                                                                            |
| 31041 |   |   |   |   |   |   |               |               | unknown protein                                                                            |
| 31069 |   |   |   |   |   |   |               |               | SSCP                                                                                       |
| 31075 | + | + | + | + | + | + |               |               | unknown protein                                                                            |
| 31118 |   | + | + |   |   |   |               |               | unknown protein                                                                            |
| 31134 | + | + |   |   |   | + | 1.116<br>down | 7.005<br>down | isoprenylcysteine carboxyl methyltransferase                                               |
| 31210 |   |   |   |   |   |   | 1.033 up      | 4.325<br>down | unknown protein                                                                            |
| 31227 | + | + | + | + | + | + |               |               | unknown protein                                                                            |
| 31248 |   | + |   |   |   |   | 1.341<br>down | 3.187<br>down | Ribonuclease. T2 family                                                                    |
| 31415 |   | + |   |   |   |   |               |               | unknown protein                                                                            |
| 31447 |   |   |   |   |   |   | 1.867 up      | 2.863 up      | unknown protein                                                                            |
| 31481 | + | + | + | + | + | + | 2.395 up      | 2.074 up      | chaperone protein dnaJ 6                                                                   |

|       |   |   |   |   |   |   |            |            |                                          |
|-------|---|---|---|---|---|---|------------|------------|------------------------------------------|
| 31521 | + | + | + | + | + | + |            |            | unknown protein                          |
| 31551 | + | + | + | + | + | + |            |            | Cytidylyltransferase                     |
| 31559 | + | + | + | + | + | + |            |            | unknown protein                          |
| 31611 | + | + | + | + | + | + |            |            | SSCRP                                    |
| 31733 | + | + | + | + | + | + |            |            | ubiquitin-conjugating enzyme. putative   |
| 31798 | + | + | + | + | + | + |            |            | transfer of mannosylphosphate            |
| 31812 |   |   |   |   |   |   |            |            | unknown protein                          |
| 31869 | + | + | + | + | + | + |            |            | unknown protein                          |
| 31976 | + | + | + | + | + | + |            |            | ribosomal protein L6                     |
| 32002 | + | + | + | + | + | + |            |            | unknown protein                          |
| 32027 |   |   |   |   |   |   |            |            | unknown protein                          |
| 32069 | + | + | + | + | + | + |            |            | unknown protein                          |
| 32087 |   |   |   |   |   |   | 1.346 up   | 4.040 up   | short chain dehydrogenase/reductase      |
| 32149 |   | + | + |   |   | + |            |            | unknown protein                          |
| 32203 | + | + | + | + | + | + |            |            | unknown protein                          |
| 32204 |   |   |   |   |   |   |            |            | unknown protein                          |
| 32212 |   |   |   |   |   |   | 1.166 down | 2.618 up   | SSCRP                                    |
| 32243 | + |   | + |   |   |   | 1.428 down | 3.056 down | Alpha/beta hydrolase                     |
| 32261 | + | + | + | + | + | + | 1.832 down | 2.678 down | unknown protein                          |
| 32263 | + | + | + |   |   |   |            |            | unknown protein                          |
| 32293 |   |   |   |   |   |   |            |            | SAM dependent methyltransferase-like     |
| 32364 |   |   |   |   |   |   | 1.586 down | 6.507 down | GDSL lipase                              |
| 32402 |   |   |   |   |   |   | 1.009 down | 3.214 up   | glutathione S-transferase GliG. putative |
| 32473 | + | + | + | + | + | + |            |            | mitochondrial ribosomal protein RSM25.   |
| 32478 |   |   |   |   |   |   | 1.093 up   | 3.281 up   | unknown protein                          |
| 32543 | + | + | + | + | + | + |            |            | unknown protein                          |

|       |   |   |   |   |   |   |            |            |                                                                   |
|-------|---|---|---|---|---|---|------------|------------|-------------------------------------------------------------------|
| 32639 |   |   |   |   |   |   | 1.471 up   | 4.886 up   | unknown protein                                                   |
| 32712 |   |   |   |   |   |   |            |            | unknown protein. NACHT domain/ankyrin repeats                     |
| 32714 | + | + | + |   |   | + |            |            | unknown protein                                                   |
| 32716 |   |   |   |   |   |   |            |            | unknown protein                                                   |
| 32747 |   |   |   |   |   |   | 1.420 up   | 2.856 up   | unknown protein                                                   |
| 32755 |   |   |   |   |   |   |            |            | Histone tail methylase containing SET domain                      |
| 32798 | + | + | + | + | + | + | 1.207 up   | 5.624 up   | unknown protein                                                   |
| 32849 | + | + | + | + | + | + | 1.465 down | 2.581 down | unknown protein                                                   |
| 33029 |   |   |   |   |   |   | 1.001 up   | 4.594 up   | unknown protein                                                   |
| 33058 |   |   |   |   |   |   | 2.148 up   | 2.491 up   | unknown protein                                                   |
| 33067 | + | + | + | + | + | + |            |            | unknown protein                                                   |
| 33085 | + | + | + | + | + | + |            |            | TFIID and SAGA complexe subunit                                   |
| 33090 | + | + | + | + | + | + |            |            | magnesium-dependent phosphatase. putative                         |
| 33169 |   |   |   |   |   |   |            |            | dienelactone hydrolase                                            |
| 33197 | + | + | + | + | + | + |            |            | mitochondrial chaperone Frataxin. putative                        |
| 33207 |   | + |   |   |   |   | 1.147 up   | 2.231 down | cation transport protein ChaC. putative                           |
| 33263 |   |   | + |   |   |   |            |            | unknown protein                                                   |
| 33312 | + | + | + | + | + | + |            |            | unknown protein                                                   |
| 33342 | + | + | + | + | + | + | 1.461 up   | 7.618 up   | Oligosaccharyltransferase. epsilon subunit                        |
| 33359 | + | + | + | + | + | + | 1.743 up   | 4.041 up   | translation initiation factor SUI1 and density-regulated protein. |
| 33371 |   |   |   |   |   |   | 1.078 up   | 2.569 up   | phosphoglycerate mutase family protein                            |
| 33387 | + | + | + | + | + | + | 1.411 down | 3.518 down | GCN5-related N-acetyltransferase. putative                        |
| 33475 | + | + | + | + | + | + |            |            | unknown protein                                                   |
| 33482 | + | + | + | + | + | + |            |            | unknown protein                                                   |
| 33502 |   |   |   |   |   |   |            |            | unknown protein                                                   |
| 33586 | + | + | + | + | + | + |            |            | ATP syntase delta chain                                           |
| 33632 |   | + | + |   |   |   |            |            | unknown protein                                                   |

|       |  |   |   |   |   |   |   |            |                                    |                                                                      |
|-------|--|---|---|---|---|---|---|------------|------------------------------------|----------------------------------------------------------------------|
| 33637 |  | + | + |   |   | + |   |            | TRAPP complex component Trs23      |                                                                      |
| 33650 |  | + | + | + |   |   |   |            | unknown protein                    |                                                                      |
| 33660 |  | + | + | + | + | + | + |            | unknown protein                    |                                                                      |
| 33692 |  | + | + | + | + | + | + |            | unknown protein                    |                                                                      |
| 33704 |  | + | + | + | + | + | + |            | transcriptional regulator. unknown |                                                                      |
| 33723 |  |   |   |   |   |   |   | 1.977 up   | 2.839 up                           | ankyrin repeat-containing protein. putative                          |
| 33728 |  | + | + | + | + | + | + |            |                                    | unknown protein                                                      |
| 33763 |  |   |   |   |   |   |   |            |                                    | unknown protein                                                      |
| 33811 |  |   |   |   |   |   |   |            |                                    | unknown protein                                                      |
| 33815 |  | + | + | + | + | + | + |            |                                    | U2 snRNP component IST3                                              |
| 33827 |  |   |   |   |   |   |   |            |                                    | unknown protein                                                      |
| 33840 |  | + | + | + | + | + | + |            |                                    | unknown protein                                                      |
| 33894 |  | + | + | + | + |   | + |            |                                    | unknown protein                                                      |
| 33895 |  | + | + | + | + | + | + |            |                                    | Peptidylprolyl isomerase. FKBP-type                                  |
| 33949 |  |   |   |   |   |   |   | 1.178 up   | 2.535 up                           | NADH:cytochrome b5 reductase (CBR). putative                         |
| 33960 |  |   | + |   |   |   |   | 1.529 up   | 2.528 up                           | prefoldin subunit 6. putative                                        |
| 34079 |  | + | + | + | + | + | + |            |                                    | small nuclear ribonucleoprotein Sm D3                                |
| 34112 |  | + | + | + | + | + | + |            |                                    | ribosomal protein L22.                                               |
| 34149 |  | + | + | + | + | + | + |            |                                    | U6 snRNA-associated Sm-like protein LSM7. putative                   |
| 34183 |  |   |   |   |   |   |   | 1.467 up   | 2.019 up                           | unknown protein                                                      |
| 34197 |  | + | + | + |   |   |   | 1.125 up   | 2.879 down                         | BoIA-like protein                                                    |
| 34221 |  | + | + |   |   |   |   |            |                                    | myb transcriptional regulator                                        |
| 34248 |  |   |   |   |   |   |   |            |                                    | transcriptional regulator HMG type                                   |
| 34252 |  |   |   |   |   |   |   | 1.742 down | 5.722 down                         | unknown protein                                                      |
| 34272 |  |   |   |   |   |   |   |            |                                    | unknown protein. only present in Neurospora. Magnaporthe. Chaetomium |
| 34274 |  | + | + | + | + | + | + |            |                                    | unknown protein                                                      |
| 34277 |  |   | + |   |   |   |   |            |                                    | unknown protein                                                      |
| 34280 |  | + | + |   |   |   |   | 2.015 up   | 2.031 up                           | unknown protein                                                      |

|       |   |   |   |   |   |   |            |           |                                                                 |
|-------|---|---|---|---|---|---|------------|-----------|-----------------------------------------------------------------|
| 34297 |   |   |   |   |   |   |            |           | SSCRP                                                           |
| 34306 | + | + | + | + | + | + |            |           | mitochondrial cytochrome c oxidase assembly factor. putative    |
| 34312 |   |   |   |   |   |   | 1.230 up   | 6.305 up  | conidiation protein 6                                           |
| 34327 | + | + | + | + | + | + | 1.702 up   | 2.138 up  | NADH-ubiquinone oxidoreductase B12 subunit. putative            |
| 34353 |   |   |   |   |   |   |            |           | unknown protein                                                 |
| 34378 | + | + | + | + | + | + |            |           | Mitochondrial cytochrome c oxidase subunit VIIc                 |
| 34402 | + | + | + | + |   | + |            |           | Histone H1/H5                                                   |
| 34611 | + | + | + | + | + | + |            |           | unknown protein                                                 |
| 34726 | + | + | + | + | + | + | 1.973 up   | 2.671 up  | Guanine nucleotide exchange factor for Ras-likeGTPases (RasGEF) |
| 34985 |   |   | + |   |   |   |            |           | C-5 cytosine-specific DNA methylase                             |
| 35109 |   |   |   |   |   |   | 1.535 down | 17.094 up | unknown protein. contains WD repeats                            |
| 35137 |   |   |   |   |   |   | 1.427 down | 2.234 up  | unknown protein                                                 |
| 35183 | + | + | + | + | + | + |            |           | unknown protein                                                 |
| 35186 |   |   |   |   |   |   |            |           | unknown protein                                                 |
| 35202 |   |   |   |   |   |   |            |           | unknown protein                                                 |
| 35240 | + | + | + | + | + | + |            |           | unknown protein                                                 |
| 35316 | + | + | + | + | + | + |            |           | SIT4 phosphatase associated protein                             |
| 35317 | + | + | + | + | + | + |            |           | unknown protein                                                 |
| 35375 | + | + | + | + | + | + |            |           | TBC domain protein (GAP)                                        |
| 35386 | + | + | + | + | + | + |            |           | actin-interacting protein AIP3                                  |
| 35454 | + | + | + | + | + | + |            |           | Zn2Cys6 transcriptional regulator                               |
| 35465 | + | + | + | + | + | + |            |           | Molecular chaperone Hsp70 family Lhs1                           |
| 35522 | + |   |   |   |   |   |            |           | AMPD. AMP deaminase                                             |
| 35534 |   |   |   |   |   |   | 1.338 up   | 2.277 up  | unknown protein                                                 |
| 35552 |   |   |   |   |   |   |            |           | C2H2 transcription factor                                       |
| 35556 | + | + | + | + | + | + |            |           | AAA ATPase                                                      |
| 35726 |   |   |   |   |   |   | 1.121 up   | 2.775 up  | Subtilisin like protease                                        |
| 35768 |   |   |   |   |   |   |            |           | unknown protein                                                 |

|       |   |   |   |   |   |   |               |               |                                                          |
|-------|---|---|---|---|---|---|---------------|---------------|----------------------------------------------------------|
| 35777 | + |   |   |   |   |   | 1.359<br>down | 2.383<br>down | K(+)/H(+) antiporter 1                                   |
| 35867 | + | + | + | + | + | + |               |               | Protein interacting with poly(A)-binding protein         |
| 36006 | + | + | + | + | + | + | 1.591<br>down | 2.621<br>down | Serine/Threonine protein kinase                          |
| 36134 | + | + | + | + | + | + |               |               | protein kinase family protein                            |
| 36159 | + | + | + | + | + | + | 1.202<br>down | 2.237<br>down | unknown protein                                          |
| 36267 | + | + | + | + |   | + |               |               | unknown protein. 3TM                                     |
| 36335 |   |   |   |   |   |   | 1.362 up      | 7.762<br>down | Zn2Cys6 transcriptional regulator                        |
| 36373 |   |   |   |   |   |   |               |               | Vacuolar assembly/sorting protein VPS9                   |
| 36391 | + | + | + | + | + | + |               |               | C2H2 transcriptional regulator                           |
| 36468 |   |   |   |   |   |   | 1.872<br>down | 3.992<br>down | Zn2Cys6 transcriptional regulator                        |
| 36530 |   | + |   |   |   |   | 1.084<br>down | 2.227<br>down | unknown protein                                          |
| 36543 | + | + | + | + | + | + |               |               | transcriptional regulator STE12                          |
| 36576 | + | + | + | + | + | + |               |               | unknown protein                                          |
| 36608 |   |   |   |   |   |   | 1.657 up      | 2.149<br>down | unknown protein                                          |
| 36639 | + | + | + | + | + | + |               |               | unknown protein                                          |
| 36703 |   |   |   |   |   |   | 1.326<br>down | 2.569<br>down | Zn2Cys6 transcriptional regulator                        |
| 36727 | + | + | + | + | + | + |               |               | unknown protein                                          |
| 36822 |   |   |   |   |   |   |               |               | unknown protein                                          |
| 36855 |   |   |   |   |   |   |               |               | unknown protein                                          |
| 36941 | + | + | + | + | + | + |               |               | DEAD/DEAH box helicase                                   |
| 37060 | + | + | + | + | + | + |               |               | Ca-permeable channel. related to <i>A. nidulans</i> Mid2 |
| 37067 | + | + | + | + | + | + |               |               | unknown protein                                          |
| 37214 | + | + | + | + | + | + |               |               | unknown protein                                          |
| 37262 |   |   |   |   |   |   |               |               | unknown protein                                          |



|       |   |   |   |   |   |   |               |               |                                                            |
|-------|---|---|---|---|---|---|---------------|---------------|------------------------------------------------------------|
| 37271 | + | + | + | + | + | + |               |               | unknown protein with SH3 domain                            |
| 37316 |   |   |   |   |   |   | 1.014<br>down | 3.350 up      | unknown protein                                            |
| 37366 | + | + | + | + | + | + |               |               | MFS permease                                               |
| 37368 | + | + | + | + | + | + |               |               | autophagy related lipase Atg15. putative                   |
| 37525 |   |   |   |   |   |   | 5.125 up      | 3.989 up      | GPCR . contains RGS domain                                 |
| 37593 | + | + | + | + | + | + |               |               | GTP binding protein                                        |
| 37665 |   |   |   |   |   |   |               |               | unknown protein                                            |
| 37761 | + | + | + | + | + | + |               |               | splicing factor U2AF 65 kDa subunit                        |
| 37783 |   |   |   |   |   |   | 3.819<br>down | 7.917<br>down | unknown protein                                            |
| 37827 |   |   |   |   |   |   |               |               | Cytochrome P450                                            |
| 37833 | + | + | + | + | + | + |               |               | UBA/THIF-type NAD/FAD binding fold                         |
| 37921 |   |   |   |   |   |   |               |               | Cytochrome P450 CYP2 subfamily                             |
| 37933 |   | + |   |   |   |   |               |               | myb transcriptional regulator                              |
| 37950 |   |   |   |   |   |   | 1.199 up      | 4.659 up      | unknown protein                                            |
| 38048 |   |   |   |   |   |   | 1.436 up      | 2.503<br>down | unknown protein                                            |
| 38080 | + | + | + | + | + | + | 1.013 up      | 2.511<br>down | C2H2 transcriptional regulator                             |
| 38227 |   |   |   |   |   |   |               |               | unknown protein                                            |
| 38274 |   |   |   |   |   |   |               |               | HET protein                                                |
| 38341 |   |   |   |   |   |   |               |               | MFS permease                                               |
| 38372 | + | + | + | + | + | + |               |               | RluA family pseudouridine synthase                         |
| 38441 |   |   | + |   |   |   |               |               | unknown protein                                            |
| 38527 |   |   |   |   |   |   |               |               | unknown protein. only present in Aspergilli and Gibberella |
| 38536 |   |   |   |   |   |   |               |               | GH16 glucan endo-1.3(4)- $\beta$ -D-glucosidase            |
| 38573 | + | + | + |   |   | + |               |               | unknown protein                                            |
| 38603 |   |   |   |   |   |   | 1.162 up      | 2.404<br>down | MFS permease                                               |

|       |   |   |   |   |   |   |            |            |                                                           |
|-------|---|---|---|---|---|---|------------|------------|-----------------------------------------------------------|
| 38640 | + | + | + | + | + | + | 1.062 up   | 2.448 down | unknown protein                                           |
| 38749 |   |   |   |   |   |   |            |            | Cytochrome P450 CYP2 subfamily                            |
| 38767 | + | + | + | + | + | + |            |            | mRNA capping enzyme                                       |
| 38781 |   |   |   |   |   |   |            |            | unknown protein                                           |
| 38812 |   |   |   |   |   |   |            |            | iron transporter                                          |
| 38833 |   |   |   |   |   |   | 1.641 down | 3.197 down | unknown protein                                           |
| 38863 | + | + | + | + | + | + | 1.257 down | 2.096 down | unknown protein                                           |
| 38876 |   |   |   |   |   |   |            |            | unknown protein                                           |
| 39156 |   |   |   |   |   |   |            |            | SSCRP                                                     |
| 39221 |   | + |   |   |   |   | 1.032 up   | 2.130 down | Zn2Cys6 transcriptional regulator                         |
| 39285 |   |   |   |   |   |   |            |            | unknown protein                                           |
| 39351 |   |   |   |   |   |   |            |            | unknown protein                                           |
| 39387 | + | + | + | + | + | + |            |            | Pex2/Pex12                                                |
| 39426 |   |   |   |   |   |   |            |            | unknown protein                                           |
| 39535 |   |   |   |   |   |   |            |            | mannitol-1-phosphate dehydrogenase                        |
| 39578 |   |   |   |   |   |   |            |            | unknown protein                                           |
| 39587 |   |   |   |   |   |   |            |            | unknown protein                                           |
| 39588 |   |   |   |   |   |   |            |            | Pyridine nucleotide-disulphide oxidoreductase.            |
| 39590 | + | + | + | + | + | + | 1.352 up   | 3.305 up   | Membrane protein Erj5 with DnaJ domain                    |
| 39606 |   |   |   |   |   |   | 1.531 down | 2.360 down | unknown protein                                           |
| 39637 |   |   |   |   |   |   |            |            | C4-dicarboxylate transporter/malic acid transport protein |
| 39753 |   |   |   |   |   |   |            |            | unknown protein                                           |
| 39755 | + | + | + |   |   |   | 1.818 down | 2.781 down | GH16 glucan endo-1.3(4)- $\beta$ -D-glucosidase           |
| 39827 | + | + | + | + | + | + |            |            | unknown protein                                           |
| 39883 | + | + | + |   |   |   |            |            | unknown protein                                           |

|       |   |   |   |   |   |   |            |            |                                                                                  |
|-------|---|---|---|---|---|---|------------|------------|----------------------------------------------------------------------------------|
| 39911 |   |   |   |   |   |   |            |            | SAM-dependent methyltransferases                                                 |
| 39942 | + | + | + | + | + | + |            |            | GH17 glucan endo-1.3-β-glucosidase                                               |
| 39996 |   |   |   |   |   |   |            |            | 6-phosphogluconolactonase. putative (check!)                                     |
| 40053 | + | + | + | + | + | + |            |            | unknown protein                                                                  |
| 40074 |   |   |   |   |   |   |            |            | sedoheptulose-1.7-bisphosphatase                                                 |
| 40114 | + | + | + | + | + | + |            |            | unknown protein                                                                  |
| 40156 | + | + | + |   |   |   |            |            | unknown protein                                                                  |
| 40199 |   |   |   |   |   |   |            |            | unknown protein                                                                  |
| 40216 | + | + | + | + | + | + |            |            | unknown protein                                                                  |
| 40250 | + | + | + | + | + | + |            |            | unknown protein                                                                  |
| 40290 | + | + | + | + | + | + | 1.281 up   | 2.479 up   | unknown protein                                                                  |
| 40298 | + |   | + |   |   |   |            |            | unknown protein                                                                  |
| 40338 | + | + | + | + | + | + |            |            | unknown protein                                                                  |
| 40343 |   |   |   |   |   |   |            |            | unknown protein                                                                  |
| 40346 |   | + |   |   |   |   | 1.959 up   | 2.292 up   | formamidopyrimidine-DNA glycosylase                                              |
| 40374 |   |   |   |   |   |   |            |            | unknown protein                                                                  |
| 40519 | + | + | + | + | + | + |            |            | unknown protein                                                                  |
| 40534 | + | + | + | + | + | + |            |            | unknown protein                                                                  |
| 40538 | + | + | + | + | + | + |            |            | unknown protein                                                                  |
| 40551 | + | + | + | + | + | + |            |            | velB                                                                             |
| 40618 |   |   |   |   |   |   |            |            | unknown protein. secreted. only in ascomycota                                    |
| 40758 | + | + | + | + | + | + |            |            | Homocysteine/selenocysteine methylase (S-methylmethionine-dependent). COG2040. M |
| 40775 |   |   |   |   |   |   | 2.429 down | 2.752 down | RTA1 protein. 7 TNM. responds to xenobiotic stimulus                             |
| 40808 |   |   |   |   |   |   | 10.571 up  | 2.515 down | short-chain dehydrogenase/reductase                                              |
| 40814 | + | + | + | + | + | + |            |            | unknown protein                                                                  |
| 40830 |   |   |   |   |   |   |            |            | unknown protein                                                                  |
| 40914 |   |   |   |   |   |   |            |            | unknown protein                                                                  |
| 40918 | + | + | + | + | + | + |            |            | unknown protein                                                                  |

|       |   |  |   |   |   |   |   |               |               |                                                                                           |                                                                                |
|-------|---|--|---|---|---|---|---|---------------|---------------|-------------------------------------------------------------------------------------------|--------------------------------------------------------------------------------|
| 40943 |   |  |   |   |   |   |   | 1.207<br>down | 3.540<br>down | unknown protein                                                                           |                                                                                |
| 40945 |   |  |   | + |   |   |   |               |               | N-glycosylase/DNA lyase                                                                   |                                                                                |
| 40996 |   |  | + | + | + | + | + | +             |               | unknown protein                                                                           |                                                                                |
| 41001 |   |  | + | + | + | + | + | +             | 1.137 up      | 2.303 up                                                                                  | unknown protein with Nif domain                                                |
| 41009 |   |  |   |   |   |   |   |               |               | Ras-like GTPase. Rho type                                                                 |                                                                                |
| 41035 |   |  | + | + | + |   |   |               |               | G-protein coupled receptor protein. contains Molluscan rhodopsine C-terminal tail. possib |                                                                                |
| 41111 |   |  | + | + | + | + | + | +             |               | RNA polymerase II transcription mediator complex subunit (Med6). putative                 |                                                                                |
| 41149 |   |  |   |   |   |   |   |               |               | unknown protein. 2 TM. only present in fungi. distantly related to acetyltransferase from |                                                                                |
| 41152 |   |  |   |   |   |   |   |               |               | unknown protein                                                                           |                                                                                |
| 41171 |   |  |   |   |   |   |   | 1.220<br>down | 4.325<br>down | unknown protein                                                                           |                                                                                |
| 41178 |   |  |   |   | + |   |   |               |               | aquaporin-2 (major intrinsic protein)                                                     |                                                                                |
| 41208 |   |  |   |   |   |   |   |               |               | metallophosphoesterase domain-containing protein. putative                                |                                                                                |
| 41248 |   |  |   |   |   |   |   |               |               | CE3 acetyl xylan esterase                                                                 |                                                                                |
| 41260 | + |  | + |   | + |   |   |               | 1.057 up      | 2.770 up                                                                                  | PTH11 GPCR                                                                     |
| 41312 |   |  |   | + | + | + |   |               |               |                                                                                           | short chain dehydrognease/reductase                                            |
| 41325 |   |  |   |   |   |   |   | 1.625 up      | 2.104<br>down | RTA1 like protein; 7 TM                                                                   |                                                                                |
| 41362 |   |  |   |   |   |   |   |               |               | unknown protein                                                                           |                                                                                |
| 41425 |   |  |   |   |   |   |   | 1.086<br>down | 3.458<br>down | unknown protein                                                                           |                                                                                |
| 41428 |   |  | + | + | + | + | + | +             | 1.027<br>down | 2.445<br>down                                                                             | Tyrosine specific protein phosphatase and dual specificity protein phosphatase |
| 41501 |   |  |   |   | + |   |   |               |               |                                                                                           | unknown protein                                                                |
| 41504 |   |  |   |   |   |   |   |               | 1.054 up      | 2.124 up                                                                                  | phosphopantetheinyl transferase. putative                                      |
| 41518 |   |  | + | + | + | + | + | +             |               |                                                                                           | unknown protein                                                                |
| 41546 |   |  | + | + | + | + | + | +             |               |                                                                                           | unknown protein                                                                |
| 41573 |   |  |   | + | + | + | + | +             | 1.293<br>down | 2.085<br>down                                                                             | BZIP transcriptional regulator                                                 |

|       |   |  |   |   |   |   |   |                 |               |                                         |
|-------|---|--|---|---|---|---|---|-----------------|---------------|-----------------------------------------|
| 41590 |   |  |   |   |   |   |   | 2.028<br>down   | 3.551<br>down | iron transporter                        |
| 41604 |   |  |   |   |   |   |   |                 |               | unknown protein. 4 TM. unknown in yeast |
| 41607 |   |  |   |   |   |   |   |                 |               | unknown protein                         |
| 41617 |   |  | + |   |   |   | + | 372.860<br>down | 5.394 up      | lae1                                    |
| 41660 |   |  |   |   |   |   |   |                 |               | HET domain protein                      |
| 41663 |   |  | + |   |   |   | + |                 |               | unknown protein                         |
| 41664 |   |  |   |   |   |   |   |                 |               | HET domain-containing protein           |
| 41690 |   |  |   |   |   |   |   |                 |               | unknown protein                         |
| 41699 |   |  |   |   |   |   | + | 2.380 up        | 3.449 up      | HET protein                             |
| 41712 |   |  |   |   |   |   |   |                 |               | ubiquitin domain                        |
| 41719 |   |  | + | + | + |   |   |                 |               | CutC family protein                     |
| 41761 |   |  | + | + |   |   |   | 1.077<br>down   | 2.205<br>down | iron transporter                        |
| 41768 |   |  |   |   |   |   |   | 1.172 up        | 3.543 up      | GH16 cell wall glucanosyltransferase    |
| 41794 |   |  |   |   |   |   |   |                 |               | unknown protein                         |
| 41800 |   |  | + | + | + | + | + |                 |               | unknown protein                         |
| 41895 |   |  |   |   |   |   |   |                 |               | glutathione-S-transferase               |
| 41942 | + |  |   |   |   |   |   | 1.770 up        | 2.165<br>down | unknown protein                         |
| 41987 |   |  | + | + | + | + | + |                 |               | unknown protein                         |
| 42027 |   |  | + | + | + | + | + |                 |               | unknown protein                         |
| 42043 |   |  |   |   |   |   |   | 1.059 up        | 3.502 up      | unknown protein                         |
| 42053 |   |  |   | + |   |   |   |                 |               | unknown protein                         |
| 42063 |   |  |   |   |   |   |   |                 |               | unknown protein                         |
| 42068 |   |  | + | + | + | + | + |                 |               | unknown protein                         |
| 42152 |   |  |   |   |   |   |   | 1.491<br>down   | 5.173<br>down | GH75 chitosanase                        |
| 42181 |   |  | + | + | + | + | + | 1.175 up        | 2.499 up      | unknown protein                         |
| 42193 |   |  | + | + | + | + | + |                 |               | unknown protein                         |

|       |   |   |   |   |   |   |            |            |                                    |
|-------|---|---|---|---|---|---|------------|------------|------------------------------------|
| 42249 | + | + | + | + | + | + |            |            | transcriptional regulator UMC1     |
| 42264 |   |   |   |   |   |   | 1.681 up   | 8.807 down | 3'-5' exonuclease                  |
| 42267 |   |   |   |   |   |   |            |            | ankyrin repeat protein             |
| 42301 | + | + | + | + | + | + |            |            | unknown protein                    |
| 42326 |   |   |   |   |   |   | 1.404 up   | 2.046 down | unknown protein                    |
| 42329 | + | + | + | + | + | + |            |            | unknown protein                    |
| 42346 | + | + |   |   |   |   |            |            | unknown protein                    |
| 42355 |   |   |   |   |   |   | 1.434 up   | 2.154 down | unknown protein                    |
| 42377 |   | + |   |   |   |   |            |            | unknown protein                    |
| 42418 | + | + | + | + | + | + |            |            | unknown protein                    |
| 42449 |   |   |   |   |   |   | 1.313 up   | 2.689 up   | N-acetyltransferase activity       |
| 42455 | + | + | + | + | + | + |            |            | unknown protein                    |
| 42462 | + | + | + | + | + | + |            |            | unknown protein                    |
| 42513 |   |   |   |   |   |   |            |            | unknown protein                    |
| 42571 |   |   |   |   |   |   | 1.196 down | 2.069 up   | unknown protein                    |
| 42752 |   |   | + |   |   |   |            |            | unique protein                     |
| 42766 |   |   |   |   |   |   |            |            | integral membrane protein          |
| 42792 |   |   |   |   |   |   |            |            | unknown protein                    |
| 42825 |   |   | + |   |   |   |            |            | Cytidine/deoxycytidylate deaminase |
| 42848 | + | + | + | + | + | + | 2.421 down | 2.534 down | unknown protein                    |
| 42858 | + | + |   |   |   |   |            |            | unknown protein                    |
| 42866 | + | + | + |   |   |   | 2.932 down | 3.059 down | thioesterase family protein        |
| 42915 | + | + | + | + | + | + |            |            | unknown protein                    |
| 42919 | + | + | + | + | + | + | 1.237 up   | 2.199 up   | ubiquitin fusion protein           |

|       |   |  |   |   |   |   |   |   |               |               |                                                             |
|-------|---|--|---|---|---|---|---|---|---------------|---------------|-------------------------------------------------------------|
| 42942 |   |  |   |   |   |   |   |   | 1.087<br>down | 2.798 up      | unknown protein                                             |
| 42953 |   |  | + | + | + | + | + | + |               |               | unknown protein                                             |
| 42972 |   |  | + | + | + | + | + | + |               |               | unknown protein. only present in Gibberella and Magnaporthe |
| 43071 |   |  | + | + | + | + | + | + |               |               | unknown protein                                             |
| 43076 |   |  |   | + |   |   |   |   | 1.070 up      | 2.626<br>down | unknown protein                                             |
| 43083 |   |  | + | + | + | + |   |   | 1.236<br>down | 3.216 up      | unknown protein                                             |
| 43101 |   |  |   |   |   |   |   |   |               |               | unknown protein                                             |
| 43115 |   |  |   |   | + |   |   |   | 2.885 up      | 2.190 up      | SSCRP                                                       |
| 43129 |   |  | + | + | + | + | + | + |               |               | unknown protein                                             |
| 43161 |   |  |   |   |   |   |   |   | 1.364 up      | 3.214 up      | Carboxylesterase and related proteins                       |
| 43176 |   |  | + | + | + | + | + | + |               |               | unknown protein                                             |
| 43191 |   |  | + | + | + | + | + | + |               |               | unknown protein                                             |
| 43195 |   |  |   |   |   |   |   |   |               |               | unknown protein                                             |
| 43199 | + |  | + |   | + |   |   |   | 1.442 up      | 3.792 up      | unknown protein                                             |
| 43225 |   |  | + | + | + | + | + | + | 2.007 up      | 3.317 up      | U6 small nuclear ribonucleoprotein (Lsm3). putative         |
| 43236 |   |  | + | + | + | + | + | + | 1.449 up      | 2.153 up      | unknown protein                                             |
| 43242 |   |  | + | + | + |   |   |   |               |               | unknown protein                                             |
| 43268 |   |  | + | + | + | + | + | + |               |               | unknown protein                                             |
| 43269 |   |  | + | + | + | + | + | + | 3.176 up      | 2.723 up      | bHLH transcriptional regulator                              |
| 43286 |   |  | + | + | + |   |   |   |               |               | unknown protein                                             |
| 43302 | + |  | + |   | + |   |   |   | 1.007<br>down | 5.446 up      | unknown protein                                             |
| 43312 |   |  | + | + | + |   |   |   |               |               | unknown protein                                             |
| 43347 |   |  |   | + |   |   |   |   |               |               | DASH complex subunit Dad3. putative                         |
| 43371 |   |  |   |   |   |   |   |   |               |               | unknown protein                                             |
| 43392 | + |  | + | + | + |   |   | + | 1.651 up      | 5.859 up      | unique protein                                              |
| 43397 |   |  |   |   |   |   |   |   |               |               | unknown protein. secreted. only in hypocreaceae. HTG        |
| 43398 |   |  |   | + |   |   |   |   |               |               |                                                             |

|       |   |  |   |   |   |   |   |            |            |                                                                                             |
|-------|---|--|---|---|---|---|---|------------|------------|---------------------------------------------------------------------------------------------|
| 43401 |   |  |   |   |   |   |   | 1.387 up   | 19.063 up  | unknown protein                                                                             |
| 43418 | + |  | + | + | + | + | + |            |            | unknown protein                                                                             |
| 43430 |   |  |   |   |   |   |   |            |            | unknown secreted protein                                                                    |
| 43472 |   |  |   |   |   |   |   |            |            | unknown protein                                                                             |
| 43599 |   |  | + | + | + | + | + |            |            | Dynamin-like GTPase Vps1                                                                    |
| 43615 |   |  | + | + | + | + | + |            |            | eukaryotic translation initiation factor 2. subunit 1 alpha. 35kDa.                         |
| 43618 |   |  | + | + | + | + | + |            |            | RNA polymerase II-associated protein                                                        |
| 43649 |   |  | + | + | + | + | + |            |            | T-complex protein 1                                                                         |
| 43662 |   |  |   |   |   |   |   |            |            | SAICAR synthase                                                                             |
| 43664 |   |  | + | + | + | + | + |            |            | UTP-glucose-1-phosphate uridylyltransferase                                                 |
| 43671 |   |  |   | + |   |   |   |            |            | ammonium permease MEA1                                                                      |
| 43680 |   |  | + | + | + | + | + |            |            | pre-mRNA branch site protein p14                                                            |
| 43701 |   |  | + | + | + | + | + | 1.993 up   | 4.588 up   | MFS multidrug transporter                                                                   |
| 43770 |   |  | + | + | + | + | + |            |            | unknown protein                                                                             |
| 43802 |   |  | + | + | + | + | + |            |            | Protein involved in ER retention Rer1                                                       |
| 43814 |   |  | + | + | + | + | + |            |            | Ribosomal protein L43A (L37 family) by homology to the corresponding protein of Candida     |
| 43817 |   |  | + | + | + | + | + |            |            | unknown protein                                                                             |
| 43831 |   |  | + | + | + | + | + |            |            | phospholipid-translocating P-type ATPase                                                    |
| 43873 |   |  |   |   |   |   |   |            |            | GH18 chitinase CHI18-12                                                                     |
| 43877 |   |  | + | + | + | + | + |            |            | Arfs GEF Sec7                                                                               |
| 43884 |   |  | + | + | + | + | + |            |            | unknown protein                                                                             |
| 43893 |   |  |   |   |   |   |   | 1.466 down | 2.366 down | unknown protein                                                                             |
| 43906 |   |  | + | + | + | + | + |            |            | 60s ribosomal protein L1.                                                                   |
| 43919 |   |  | + | + | + | + | + |            |            | unknown protein                                                                             |
| 43961 |   |  |   |   |   |   |   |            |            | RNA polymerase III transcription initiation factor complex (TFIIIC) subunit part of the Tau |
| 43974 |   |  | + | + | + | + | + | 1.608 up   | 2.180 up   | UDP-galactose transporter                                                                   |
| 44035 |   |  | + | + | + | + | + |            |            | unknown protein                                                                             |
| 44038 |   |  | + | + | + | + | + |            |            | dihydrolipoyllysine-residue acetyltransferase-like protein                                  |
| 44041 |   |  | + | + | + | + | + |            |            | NADH dehydrogenase (ubiquinone) Fe-S protein 1                                              |



|       |   |   |   |   |   |   |               |                |                                                       |
|-------|---|---|---|---|---|---|---------------|----------------|-------------------------------------------------------|
| 44088 | + | + | + | + | + | + |               |                | unknown protein                                       |
| 44097 | + | + | + | + | + | + |               |                | AAA family ATPase Pontin. putative                    |
| 44117 |   |   |   |   |   |   | 1.424<br>down | 2.529<br>down  | Heterokaryon incompatibility protein HEC-C            |
| 44175 | + | + | + |   |   |   | 5.701<br>down | 10.981<br>down | MFS H+ sugar transporter                              |
| 44178 | + | + | + | + |   | + |               |                | unknown protein                                       |
| 44214 | + | + | + | + | + | + |               |                | CE5 acetyl xylan esterase AXE2                        |
| 44230 | + | + | + | + | + | + |               |                | GTP-binding protein EsdC                              |
| 44251 | + | + | + | + | + | + | 1.078<br>down | 2.544 up       | GTPase-activating protein Msb3 (Sec4/Rab5)            |
| 44278 | + | + | + | + |   | + | 2.647<br>down | 4.813<br>down  | Rab geranyl transferase escort protein                |
| 44290 | + | + | + | + | + | + |               |                | C2H2 transcriptional regulator                        |
| 44306 |   |   |   |   |   |   |               |                | unknown protein                                       |
| 44330 | + | + | + | + | + | + |               |                | serine/threonine protein kinase YAK1                  |
| 44362 |   |   |   |   |   |   | 7.751 up      | 8.294 up       | unknown protein                                       |
| 44366 |   |   |   |   |   |   | 2.297<br>down | 2.179<br>down  | Glycosylphosphatidylinositol-specific phospholipase C |
| 44386 | + | + | + | + | + | + |               |                | ribosomal protein MRPL40.                             |
| 44389 |   |   |   |   |   |   |               |                | Urease accessory protein UreG                         |
| 44399 | + | + | + | + | + | + |               |                | unknown protein                                       |
| 44419 | + | + | + | + |   |   |               |                | ARG5.6                                                |
| 44434 | + | + | + | + | + | + |               |                | unknown protein                                       |
| 44449 | + | + | + | + | + | + |               |                | centromere/microtubule binding protein CBF5           |
| 44459 | + | + | + | + | + | + | 2.076 up      | 3.266 up       | Rfc4p (replication factor C) subunit 4                |
| 44476 | + |   | + |   |   |   | 4.980<br>down | 2.986<br>down  | MRP-type ABC transporter                              |
| 44488 | + | + | + | + | + | + |               |                | unknown protein                                       |
| 44492 | + | + | + | + | + | + |               |                | mitochondrial import receptor subunit TOM40           |
| 44504 | + | + | + | + | + | + |               |                | actin                                                 |

|       |   |   |   |   |   |   |            |            |                                                                                   |
|-------|---|---|---|---|---|---|------------|------------|-----------------------------------------------------------------------------------|
| 44529 | + | + | + | + | + | + |            |            | glycogen synthase involved in carbohydrate transport and metabolism               |
| 44546 | + | + | + | + | + | + |            |            | unknown protein                                                                   |
| 44624 | + | + | + | + | + | + |            |            | unknown protein                                                                   |
| 44628 |   |   |   |   |   |   |            |            | Kynureninase                                                                      |
| 44640 |   |   |   |   |   |   | 2.128 up   | 2.630 up   | unknown protein                                                                   |
| 44684 | + | + | + | + | + | + |            |            | unknown protein                                                                   |
| 44700 | + | + | + |   |   |   |            |            | unknown protein. only present in ascomycota and Bacteriophage phBC6A51            |
| 44704 | + | + | + | + | + | + |            |            | Rab family GTPase activating protein                                              |
| 44705 | + | + | + | + | + | + |            |            | cell lysis protein-like protein                                                   |
| 44725 | + | + | + | + | + | + |            |            | PDI related protein Eps1                                                          |
| 44747 |   |   |   |   |   |   |            |            | SNF2 family helicase                                                              |
| 44764 |   |   |   |   |   |   |            |            | Unknown protein with GRF zinc finger domain.                                      |
| 44781 |   |   |   |   |   |   |            |            | Transcription initiation factor IID. 18 kDa subunit                               |
| 44814 | + | + | + | + | + | + |            |            | COPI-coated vesicle protein. putative                                             |
| 44849 | + | + | + | + | + | + |            |            | ADP-ribosylation factor GTPase activating protein                                 |
| 44868 | + | + | + | + | + | + |            |            | unknown protein                                                                   |
| 44878 | + | + | + | + | + | + | 1.298 down | 2.413 down | unknown protein                                                                   |
| 44928 |   |   |   |   |   |   |            |            | 5-formyltetrahydrofolate cyclo-ligase                                             |
| 44943 | + | + | + | + | + | + |            |            | unknown protein                                                                   |
| 44956 | + | + | + | + | + | + |            |            | MFS permease                                                                      |
| 44960 | + | + | + | + | + | + |            |            | pre-mRNA splicing factor CEF1. putative                                           |
| 44965 | + |   |   |   |   |   |            |            | zinc binding oxidoreductase                                                       |
| 44967 | + | + | + | + |   | + |            |            | unknown protein.                                                                  |
| 44987 | + | + | + | + | + | + |            |            | ERG25 methylsterol desaturase. SUR2-type hydroxylase/desaturase. catalytic region |
| 45018 | + | + | + | + | + | + |            |            | MAPK3. probably involved in stress response and osmosensing. Hog1p                |
| 45050 | + | + | + | + | + | + |            |            | vacuolar sorting protein. vps17                                                   |
| 45085 | + | + | + | + | + | + |            |            | unknown protein                                                                   |
| 45112 | + | + | + |   |   |   |            |            | serine/threonine protein kinase                                                   |
| 45138 | + | + | + | + | + | + |            |            | sulfite reductase. $\beta$ -subunit                                               |

|       |   |   |   |   |   |   |   |            |            |                                                 |
|-------|---|---|---|---|---|---|---|------------|------------|-------------------------------------------------|
| 45153 |   | + | + | + | + | + | + |            |            | mitochondrial F1FO ATP synthase subunit F Atp17 |
| 45191 |   | + | + | + | + | + | + |            |            | unknown protein                                 |
| 45242 |   | + | + | + | + | + | + |            |            | Transmembran serin/threoninkinase Ire1          |
| 45250 |   | + | + | + | + | + | + | 1.483 up   | 4.138 up   | oleate-delta12-desaturase                       |
| 45252 |   | + | + | + | + | + | + |            |            | unknown protein                                 |
| 45317 |   | + | + | + | + | + |   |            |            | unknown protein                                 |
| 45343 |   |   |   |   |   |   |   |            |            | Sodium Bile acid symporter family protein       |
| 45369 |   |   |   |   |   |   |   |            |            | unknown protein                                 |
| 45445 |   | + | + | + | + | + | + |            |            | tyrosinase                                      |
| 45456 |   | + | + | + | + | + | + |            |            | Protein kinase                                  |
| 45459 |   | + | + | + |   |   |   |            |            | BCAT_beta_family                                |
| 45476 |   | + | + | + | + | + | + |            |            | v-Snare Sft1; intra-Golgi                       |
| 45503 |   |   |   |   |   |   |   |            |            | ankyrin containing protein                      |
| 45512 |   |   |   |   |   |   |   | 1.314 up   | 2.214 up   | unknown protein                                 |
| 45523 |   |   |   |   |   |   |   |            |            | MFS permease                                    |
| 45571 |   |   |   |   |   |   |   |            |            | short chain dehydrogenase/reductase             |
| 45573 |   | + | + | + |   |   |   | 1.329 up   | 2.118 up   | PTH11 GPCR                                      |
| 45595 |   | + | + | + | + | + | + |            |            | unknown protein                                 |
| 45598 |   | + | + | + | + | + | + | 2.064 down | 2.003 down | unknown protein                                 |
| 45604 |   | + | + | + | + | + | + |            |            | ADP-ribosylation factor Arf1                    |
| 45624 |   | + | + | + | + | + | + |            |            | unknown protein                                 |
| 45652 |   |   |   |   |   |   |   |            |            | Protein kinase                                  |
| 45675 |   |   |   |   |   |   |   | 1.482 down | 3.326 down | unknown protein                                 |
| 45688 | + |   |   |   |   |   |   |            |            | unknown protein                                 |
| 45689 |   | + | + | + | + | + | + |            |            | unknown protein                                 |
| 45717 |   |   |   |   | + |   |   | 4.496 down | 4.485 down | GH47 $\alpha$ -1.2-mannosidase                  |
| 45727 |   | + | + | + | + | + | + |            |            | Metallophosphoesterase                          |

|       |   |   |   |   |   |   |            |            |                                                                                            |
|-------|---|---|---|---|---|---|------------|------------|--------------------------------------------------------------------------------------------|
| 45732 | + | + | + | + | + | + |            |            | Oligosaccharyltransferase. gamma subunit                                                   |
| 45736 | + | + | + | + | + | + |            |            | CPC2                                                                                       |
| 45748 | + | + | + | + | + | + |            |            | unknown protein                                                                            |
| 45775 | + | + | + | + | + | + |            |            | Cytoskeleton assemblyControl protein. sla1. interacts with proteins regulating actin dynar |
| 45852 |   |   |   |   |   |   |            |            | unknown protein                                                                            |
| 45866 | + | + | + | + |   |   |            |            | C2H2 transcriptional regulator                                                             |
| 45868 | + | + | + | + |   |   |            |            | phosphate transporter                                                                      |
| 45912 | + | + | + | + | + | + |            |            | 60s ribosomal protein L36 based on homology to the corresponding protein in other fungi    |
| 45971 | + | + |   |   |   |   |            |            | mismatched base pair and cruciform DNA recognition protein                                 |
| 45980 | + | + | + | + | + | + |            |            | unknown protein                                                                            |
| 45998 | + | + | + | + | + | + |            |            | serine threonine protein kinase SNF1                                                       |
| 46002 | + | + | + | + | + | + |            |            | unknown protein. only in fungi                                                             |
| 46035 |   |   |   |   |   |   |            |            | unknown protein                                                                            |
| 46057 | + | + | + | + | + | + | 1.111 up   | 2.011 up   | unknown protein                                                                            |
| 46127 | + |   | + |   |   |   |            |            | unknown protein                                                                            |
| 46128 |   |   |   |   |   |   | 2.682 down | 2.114 down | AAA ATPase                                                                                 |
| 46203 | + | + | + | + | + | + |            |            | unknown protein                                                                            |
| 46209 |   |   |   |   |   |   |            |            | SAM-methyltransferase. only Hypocreaceae                                                   |
| 46238 | + | + | + | + | + | + |            |            | S-adenosylmethionine synthetase                                                            |
| 46240 | + | + | + | + | + | + |            |            | ATP-binding protein                                                                        |
| 46242 | + | + | + | + | + | + |            |            | unknown protein                                                                            |
| 46244 | + | + | + | + | + | + |            |            | tetrahydrofolate dehydrogenase/cyclohydrolase                                              |
| 46247 | + | + | + | + | + | + |            |            | unknown protein                                                                            |
| 46266 | + | + | + | + | + | + |            |            | unknown protein                                                                            |
| 46285 |   |   |   |   |   |   |            |            | Hsp26/Hsp42                                                                                |
| 46301 | + | + | + | + | + | + |            |            | ubiquinone biosynthesis monooxygenase COQ6                                                 |
| 46320 |   |   |   |   |   |   | 1.441 up   | 2.162 up   | small nuclear ribonucleoprotein LSM2                                                       |
| 46382 | + | + | + | + | + | + |            |            | elongation factor Tu (GTP binding).                                                        |
| 46421 | + | + | + | + | + | + |            |            | GT $\alpha$ -1.2-mannosyltransferase                                                       |

|       |   |   |   |   |   |   |   |            |            |                                                                                        |
|-------|---|---|---|---|---|---|---|------------|------------|----------------------------------------------------------------------------------------|
| 46443 |   | + | + | + |   |   |   | 1.623 up   | 2.437 down | GT $\alpha$ -1.6-mannosyltransferase                                                   |
| 46446 |   | + | + | + | + | + | + | 1.162 down | 2.194 down | Thioredoxin binding protein TBP-2                                                      |
| 46463 |   | + | + | + | + | + | + |            |            | serine palmitoyl transferase. subunit LCBB                                             |
| 46469 |   | + | + | + | + | + | + |            |            | G-protein beta subunit                                                                 |
| 46490 |   | + | + | + | + | + | + |            |            | Rps16 gene encoding protein component of the small (40S)Ribosomal subunit (S9 family). |
| 46493 |   |   |   |   |   |   |   |            |            | unknown protein                                                                        |
| 46545 |   | + | + | + | + | + | + | 2.305 up   | 18.397 up  | Prephenate dehydrogenase                                                               |
| 46582 |   | + | + | + | + | + | + |            |            | unknown protein                                                                        |
| 46597 |   | + | + | + | + | + | + |            |            | unknown protein                                                                        |
| 46607 |   | + | + | + | + | + | + |            |            | Nop14p. maturation of 18rRNA                                                           |
| 46613 |   | + | + | + | + | + | + |            |            | unknown protein                                                                        |
| 46619 |   | + | + | + | + | + | + |            |            | ATP-dependent RNA helicase eIF4A                                                       |
| 46639 |   | + | + | + | + | + | + |            |            | Prenylated Rab acceptor 1 Yip3                                                         |
| 46687 |   | + | + | + | + | + | + |            |            | unknown protein with PX domain                                                         |
| 46702 |   | + | + | + | + | + | + |            |            | eukaryotic translation initiation factor 3 subunit M                                   |
| 46763 |   | + | + | + | + | + | + | 1.281 up   | 3.639 down | endonuclease/exonuclease/phosphatase family protein                                    |
| 46764 |   |   |   |   |   |   |   |            |            | unknown protein                                                                        |
| 46794 |   | + | + | + | + | + | + |            |            | oligopeptide transporter                                                               |
| 46816 |   |   |   |   |   |   |   | 2.115 down | 3.253 up   | GH3 $\beta$ -glucosidase CEL3d                                                         |
| 46819 | + |   |   |   |   |   |   |            |            | MFS hexose transporter                                                                 |
| 46862 |   | + | + | + | + | + | + |            |            | transcription factor IWS1                                                              |
| 46882 |   | + | + | + | + | + | + |            |            | unknown protein                                                                        |
| 46902 |   | + | + | + | + | + | + |            |            | Transcriptional activator HAC1. UPR regulator                                          |
| 46936 |   | + | + | + | + | + | + |            |            | 2-deoxy-D-gluconate 3-dehydrogenase                                                    |
| 46958 |   | + | + | + | + | + | + |            |            | Translation elongation factor 1a                                                       |
| 47020 |   |   |   | + |   |   |   |            |            | Phosphatidylinositol transfer protein                                                  |
| 47049 |   | + | + | + | + | + | + |            |            | unknown protein                                                                        |

|       |   |   |   |   |   |   |               |               |                                                                          |
|-------|---|---|---|---|---|---|---------------|---------------|--------------------------------------------------------------------------|
| 47055 | + | + | + | + | + | + |               |               | RAS small GTPase. Rac subfamily. related to Colletotrichum trifolii RAC1 |
| 47066 | + | + | + | + | + | + |               |               | Sulfate adenylyltransferase                                              |
| 47069 | + | + | + | + | + | + |               |               | unknown protein                                                          |
| 47077 |   |   |   |   |   |   | 1.986<br>down | 2.020<br>down | diunknown proteingenzyme                                                 |
| 47127 | + | + | + | + | + | + |               |               | peptidase M18                                                            |
| 47134 |   |   |   |   |   |   |               |               | unknown protein                                                          |
| 47136 | + | + | + | + | + | + | 1.064 up      | 2.384 up      | Glutathione peroxidase                                                   |
| 47153 | + | + | + | + | + | + |               |               | D-galacturonic acid reductase                                            |
| 47167 | + | + | + | + | + | + |               |               | unknown protein                                                          |
| 47175 | + | + | + | + | + | + |               |               | Aa_transTransmembrane amino acid transporter protein                     |
| 47221 | + | + | + | + | + | + |               |               | Nucleoside diphosphate kinase                                            |
| 47268 | + | + | + |   | + | + | 2.346 up      | 2.922 up      | GH3 $\beta$ -glucosidase BGL3i                                           |
| 47286 | + | + | + |   |   |   | 1.704<br>down | 2.369<br>down | unknown protein                                                          |
| 47290 | + | + | + | + | + | + |               |               | protein palmitoyl transferase PFA3                                       |
| 47315 |   |   |   |   |   |   | 2.264<br>down | 2.449<br>down | P-type ATPase                                                            |
| 47317 | + | + | + | + | + |   |               |               | Zn2Cys6 transcriptional regulator                                        |
| 47330 | + | + | + | + | + | + | 1.578 up      | 4.142 up      | SSCRP                                                                    |
| 47420 | + |   |   |   |   |   |               |               | FAD binding domain-containing protein                                    |
| 47424 |   |   |   |   |   |   |               |               | unknown protein                                                          |
| 47432 | + | + | + | + | + | + |               |               | NAD(P) transhydrogenase beta subunit                                     |
| 47479 |   |   |   |   |   |   | 1.229 up      | 3.275<br>down | Zn2Cys6 transcriptional regulator                                        |
| 47510 | + | + | + | + | + | + | 1.451 up      | 2.230 up      | Complex 1 LYR protein                                                    |
| 47600 | + | + | + | + | + | + |               |               | unknown protein                                                          |
| 47603 | + | + | + | + | + | + | 1.351<br>down | 2.082 up      | succinyl-CoA:3-ketoacid-coenzyme A transferase subunit A                 |
| 47611 |   | + |   |   |   |   |               |               | unknown protein                                                          |
| 47621 | + | + | + | + | + | + |               |               | unknown protein                                                          |



|       |   |   |   |   |   |   |            |            |                                                                               |
|-------|---|---|---|---|---|---|------------|------------|-------------------------------------------------------------------------------|
| 48281 | + | + | + | + | + | + |            |            | Zn2Cys6 transcriptional regulator                                             |
| 48295 |   | + |   |   |   |   | 1.862 up   | 2.929 up   | unknown protein                                                               |
| 48301 | + | + | + | + | + | + |            |            | unknown protein                                                               |
| 48351 | + | + | + | + | + | + |            |            | protease required for autophagy                                               |
| 48366 | + | + | + | + | + | + | 1.269 up   | 2.111 up   | 26S proteasome regulatory complex subunit Rpn12                               |
| 48386 | + | + | + | + | + | + |            |            | Histone deacetylase; regulates transcription and silencing                    |
| 48398 | + | + | + | + | + | + |            |            | unknown protein                                                               |
| 48438 |   |   | + |   |   |   | 1.270 down | 3.364 down | Zn2Cys6 transcriptional regulator                                             |
| 48444 | + |   | + |   |   |   |            |            | MFS maltose permease                                                          |
| 48478 | + | + | + |   | + |   |            |            | t-SNARE. SSO2                                                                 |
| 48482 |   |   |   |   |   |   |            |            | unknown protein                                                               |
| 48486 | + | + | + | + | + | + |            |            | unknown protein                                                               |
| 48516 | + | + | + | + | + | + |            |            | half-sized ABC transporter                                                    |
| 48541 | + | + | + | + | + | + |            |            | unknown protein                                                               |
| 48599 |   |   |   |   |   |   |            |            | unknown protein                                                               |
| 48603 |   |   |   |   |   |   |            |            | glycerophosphoryl diester phosphodiesterase family protein                    |
| 48653 | + | + | + | + | + | + |            |            | F-box domain-containing protein                                               |
| 48686 | + | + | + | + | + | + |            |            | unknown protein                                                               |
| 48707 | + | + | + | + | + | + |            |            | Bifunctional trehalose-6-phosphate synthase/trehalose-6-phosphate phosphatase |
| 48747 | + | + | + |   |   |   |            |            | unknown protein                                                               |
| 48773 |   |   |   |   |   |   |            |            | Zn2Cys6 transcriptional regulator                                             |
| 48788 | + | + | + | + | + | + |            |            | fatty acid synthase - candidate FAS2                                          |
| 48792 | + | + |   |   |   |   | 2.193 up   | 3.449 up   | amidase                                                                       |
| 48819 | + | + | + | + | + | + |            |            | aspartyl-tRNA synthetase. class IIb.                                          |
| 48835 | + | + | + | + | + | + |            |            | ARF GAP zinc finger protein Gcs1                                              |
| 48852 |   | + |   |   |   |   |            |            | unknown protein                                                               |
| 48865 | + | + | + | + | + | + |            |            | unknown protein                                                               |
| 48883 | + | + | + | + | + | + |            |            | unknown protein                                                               |
| 48910 | + | + | + | + | + | + |            |            | protein phosphatase 2A                                                        |



|       |   |   |   |   |   |   |               |               |                                                         |
|-------|---|---|---|---|---|---|---------------|---------------|---------------------------------------------------------|
| 48924 | + | + | + | + | + | + |               |               | calcipressin                                            |
| 48951 | + | + | + | + | + | + | 1.266<br>down | 2.215<br>down | unknown protein                                         |
| 49038 | + | + | + | + | + | + |               |               | eukaryotic initiation factor 3. gamma subunit.          |
| 49048 |   |   |   |   |   |   | 2.152<br>down | 6.111<br>down | RNA-dependent RNA-polymerase                            |
| 49059 | + | + | + | + | + | + |               |               | nuclear exosomal RNA helicase. related to N. crassa FRH |
| 49081 |   |   |   |   |   |   | 3.051<br>down | 21.255 up     | GH74 Xyloglucanase CEL74a                               |
| 49099 | + | + | + | + | + | + |               |               | glutaredoxin                                            |
| 49112 | + | + | + |   |   |   | 2.004<br>down | 2.831<br>down | Glutamate-1-semialdehyde aminotransferase               |
| 49149 | + | + | + | + | + | + | 1.817 up      | 3.015 up      | Translocation protein Sec66                             |
| 49193 | + | + | + |   |   | + | 1.274 up      | 2.066 up      | GH17 glucan 1.3-β-glucosidase                           |
| 49197 | + | + | + | + | + | + |               |               | threonyl-tRNA synthetase. class IIa.                    |
| 49205 | + | + | + | + | + | + |               |               | cytochrome C peroxidase                                 |
| 49213 | + | + | + | + | + | + |               |               | 14-3-3 protein                                          |
| 49232 | + | + | + | + | + | + |               |               | Zn2Cys6 transcriptional regulator                       |
| 49274 |   |   |   |   |   |   |               |               | glucan endo-1.3(4)-β-D-glucosidase                      |
| 49295 | + | + | + | + | + | + | 1.128<br>down | 2.004<br>down | unknown protein                                         |
| 49304 | + | + | + | + | + | + |               |               | unknown protein                                         |
| 49308 | + | + | + | + | + | + |               |               | unknown protein                                         |
| 49366 |   |   |   |   |   |   | 9.869<br>down | 4.569<br>down | unknown protein                                         |
| 49372 | + | + | + | + | + | + |               |               | Zn2Cys6 transcriptional regulator                       |
| 49373 | + | + | + | + | + | + |               |               | UTP15. encoding a component of the SSU processome       |
| 49399 | + | + | + | + | + | + |               |               | Adenosine deaminase-related growth factor               |
| 49409 | + | + | + | + | + | + |               |               | GH76 α-1.6-mannanase                                    |
| 49489 | + | + | + | + | + | + |               |               | long-chain-fatty-acid-CoA ligase                        |
| 49517 |   | + |   |   |   |   | 1.469 up      | 2.630 up      | unknown protein                                         |

|       |   |   |   |   |   |   |                |                 |                                                               |
|-------|---|---|---|---|---|---|----------------|-----------------|---------------------------------------------------------------|
| 49522 | + | + | + | + | + | + |                |                 | Transcription factor TFIIS                                    |
| 49589 | + | + | + | + | + | + | 1.387<br>down  | 133.610<br>down | unknown protein                                               |
| 49594 | + | + | + | + | + | + |                |                 | mitochondrial import inner membrane translocase subunit TIM10 |
| 49649 |   |   |   |   |   |   |                |                 | unknown protein                                               |
| 49696 | + | + | + | + | + | + |                |                 | unknown protein with DnaJ domain                              |
| 49746 | + | + | + | + | + | + |                |                 | unknown protein with Kelch repeats                            |
| 49753 | + | + | + | + | + | + | 1.570<br>down  | 3.133<br>down   | L-arabinitol 4-dehydrogenase                                  |
| 49770 | + | + | + | + | + | + |                |                 | ATP-dependent RNA helicase ROK1. putative                     |
| 49795 | + | + | + |   | + | + |                |                 | unknown protein                                               |
| 49818 | + | + | + | + | + | + |                |                 | unknown protein                                               |
| 49832 |   |   |   |   |   |   | 1.155<br>down  | 2.510<br>down   | QDE2. Argonaute-like protein. essential for quelling          |
| 49838 | + | + | + | + | + | + |                |                 | unknown protein                                               |
| 49854 | + | + | + | + | + | + |                |                 | BZIP transcriptional regulator                                |
| 49864 | + | + | + | + | + | + | 1.322 up       | 2.180 up        | unknown protein                                               |
| 49873 | + | + | + | + | + | + |                |                 | transcriptional regulator. unknown                            |
| 49888 |   |   |   |   |   |   |                |                 | AAA ATPase                                                    |
| 49898 |   |   |   |   |   |   |                |                 | glucosamine-6-phosphate isomerase                             |
| 49909 | + | + | + | + | + | + |                |                 | Ribosomal protein S7                                          |
| 49918 | + | + | + | + | + | + |                |                 | transcriptional regulator. unknown                            |
| 49923 | + | + | + | + | + | + |                |                 | 26S proteasome regulatory complex subunit Rpn7                |
| 49928 |   |   | + |   |   |   | 1.144<br>down  | 7.578 up        | unknown protein. only in Sordariomycetes                      |
| 49946 |   |   |   |   |   |   |                |                 | Glutathione S-transferase                                     |
| 49970 | + | + | + | + | + | + |                |                 | H <sup>+</sup> nucleoside cotransporter                       |
| 49976 |   |   |   |   |   |   | 14.409<br>down | 30.525 up       | GH5 endo- $\beta$ -1.4-glucanase EGL5/CEL45a                  |
| 49979 | + | + | + | + | + | + |                |                 | OPT oligopeptide transporter. putative                        |
| 49992 | + | + | + | + | + | + |                |                 | BTN1                                                          |

|       |   |   |   |   |   |   |            |            |                                                                                        |
|-------|---|---|---|---|---|---|------------|------------|----------------------------------------------------------------------------------------|
| 50039 | + | + | + | + | + | + |            |            | Mn superoxide dismutase. mitochondrial                                                 |
| 50068 | + | + | + | + | + | + |            |            | Histidine kinase                                                                       |
| 50071 | + | + | + | + | + | + |            |            | protein kinase IME2. inducer of meiosis                                                |
| 50077 |   |   |   |   |   |   | 2.121 up   | 2.333 up   | Amino acid transporters                                                                |
| 50104 |   |   |   |   |   |   | 1.752 up   | 2.040 up   | phosphatidyl synthase (A. fumigatus)                                                   |
| 50131 | + | + | + | + | + | + |            |            | peroxisomal biogenesis factor 11                                                       |
| 50159 |   |   |   |   |   |   |            |            | 3-methyl-2-oxobutanoate hydroxymethyltransferase                                       |
| 50160 |   | + |   |   |   |   |            |            | Palmitoyltransferase SWF1                                                              |
| 50212 |   |   | + |   |   |   |            |            | GT Glycosyltransferases not yet assigned to a family                                   |
| 50215 | + |   | + |   |   | + | 6.380 down | 2.374 up   | GH16 endo-1.3-β-D-glucosidase/1.3-glucan binding protein                               |
| 50249 | + | + | + | + | + | + | 1.231 down | 2.103 down | peptidase family M3                                                                    |
| 50268 | + | + | + | + | + | + |            |            | sir2 family histone deacetylase                                                        |
| 50299 | + | + | + | + | + | + |            |            | unknown protein with TPR repeats                                                       |
| 50316 | + | + | + | + | + | + |            |            | unknown protein                                                                        |
| 50323 |   |   |   |   |   |   | 2.246 up   | 3.620 up   | OOC1                                                                                   |
| 50335 | + | + | + | + | + | + |            |            | cdc42                                                                                  |
| 50390 |   |   |   |   |   |   |            |            | 5' nucleotidase                                                                        |
| 50429 | + | + | + | + | + | + | 1.620 up   | 3.515 up   | unknown protein                                                                        |
| 50449 | + | + | + | + | + | + |            |            | unknown protein                                                                        |
| 50491 | + | + | + | + | + | + |            |            | unknown protein                                                                        |
| 50516 | + | + | + | + | + | + | 1.621 up   | 2.032 up   | ATPase. V-type                                                                         |
| 50531 | + | + | + | + | + | + |            |            | 2-oxoglutarate dehydrogenase-like protein                                              |
| 50536 | + | + | + | + | + | + |            |            | unknown protein                                                                        |
| 50539 | + | + | + | + | + | + |            |            | unknown protein                                                                        |
| 50542 | + | + | + | + | + | + |            |            | ABC transporter                                                                        |
| 50583 |   |   |   |   |   |   | 1.556 down | 3.869 down | Guanine deaminase (GDEase). an aminohydrolase responsible for the conversion ofGuanine |
| 50593 |   |   |   |   |   |   | 2.758 up   | 2.845 up   | 5' nucleotidase                                                                        |

|       |   |   |   |   |   |   |            |            |                                                           |
|-------|---|---|---|---|---|---|------------|------------|-----------------------------------------------------------|
| 50607 | + | + | + | + | + | + |            |            | Sterol O-acyltransferase/Diacylglycerol O-acyltransferase |
| 50616 | + | + | + | + |   | + | 1.118 up   | 8.243 down | Coenzyme A transferase                                    |
| 50618 | + | + | + | + | + | + |            |            | MFS permease                                              |
| 50625 | + | + | + | + | + | + | 1.201 down | 2.018 down | unknown protein                                           |
| 50647 |   |   |   |   |   |   |            |            | ERAD-associated E3 ubiquitin-protein ligase HRD1          |
| 50707 | + | + | + | + | + | + |            |            | unknown protein with WD repeats                           |
| 50712 | + | + | + | + | + | + |            |            | RNA binding protein                                       |
| 50786 | + | + | + | + | + | + | 3.020 up   | 2.845 up   | Flavin-linked sulfhydryl oxidase                          |
| 50793 |   |   |   |   |   |   |            |            | tyrosinase                                                |
| 50882 | + | + | + | + | + | + |            |            | pre-mRNA-splicing factor CWC25. putative                  |
| 50894 |   |   |   |   |   |   |            |            | MFS permease                                              |
| 50913 | + | + | + | + | + | + |            |            | Peptidase C50. separase bimB                              |
| 50947 | + | + | + |   |   | + |            |            | cell division cycle protein 123 . putative                |
| 50996 | + | + |   | + |   | + | 4.528 down | 7.482 down | unknown protein. C2 domain                                |
| 51103 | + | + | + | + | + | + |            |            | Tryptophan synthase                                       |
| 51110 | + | + | + | + | + | + |            |            | IndA1 amino acid transporter                              |
| 51130 | + | + | + | + | + | + | 1.063 down | 2.182 up   | cytochrome c                                              |
| 51153 | + | + | + | + | + | + |            |            | GT $\alpha$ -1.2-mannosyltransferase                      |
| 51171 |   |   |   |   |   |   |            |            | unknown protein                                           |
| 51197 | + | + | + | + | + | + |            |            | unknown protein with CCHC finger                          |
| 51212 | + | + | + | + | + | + |            |            | Ribosomal protein L5                                      |
| 51217 |   |   |   |   |   |   |            |            | sulfate transporter. putative                             |
| 51228 | + | + | + | + | + | + |            |            | histone H1-binding protein. putative                      |
| 51287 | + | + | + | + | + | + |            |            | histone-lysine N-methyltransferase SET9                   |
| 51365 | + | + | + | + | + | + |            |            | Subtilisin-like protease PPRC1                            |
| 51375 | + | + | + | + | + | + | 1.968 up   | 3.018 up   | unknown protein                                           |
| 51378 | + | + | + | + | + | + |            |            | Ubiquitin-like modifier-activating enzyme atg-7. putative |

|       |   |   |   |   |   |   |               |               |                                                                               |
|-------|---|---|---|---|---|---|---------------|---------------|-------------------------------------------------------------------------------|
| 51407 | + | + | + | + | + | + | 1.753<br>down | 2.200<br>down | unknown protein                                                               |
| 51415 | + | + | + | + |   |   | 1.841<br>down | 2.361<br>down | unknown protein                                                               |
| 51420 | + | + | + | + | + | + |               |               | ribosomal RNA adenine methylase transferase.                                  |
| 51426 | + | + | + | + | + | + | 1.256 up      | 2.757 up      | Ribosomal protein L30 based on homology with similar proteins in other fungi. |
| 51430 | + | + | + | + | + | + |               |               | ribosomal protein L10e.                                                       |
| 51443 | + | + | + | + | + | + |               |               | unknown protein                                                               |
| 51455 | + | + | + | + | + | + |               |               | ATP-dependent RNA helicase DBP5                                               |
| 51483 |   |   |   |   |   |   |               |               | Haloacid dehalogenase-like hydrolase                                          |
| 51492 | + | + | + | + | + | + |               |               | Chitin synthase                                                               |
| 51499 | + | + | + | + | + | + |               |               | ketol-acid reductoisomerase. mitochondrial precursor                          |
| 51528 | + | + | + | + | + | + |               |               | unknown protein                                                               |
| 51558 |   |   |   |   |   |   | 1.335<br>down | 2.630<br>down | unknown protein                                                               |
| 51562 | + | + | + | + | + | + |               |               | choline kinase . putative                                                     |
| 51603 |   | + | + |   |   |   | 1.097<br>down | 2.285<br>down | unknown protein                                                               |
| 51650 |   | + | + |   |   |   |               |               | unknown protein                                                               |
| 51654 |   |   |   |   |   |   | 1.231<br>down | 2.496<br>down | unknown protein                                                               |
| 51686 |   | + |   |   |   |   |               |               | Dienelactone hydrolase                                                        |
| 51697 | + | + | + | + | + | + |               |               | unknown protein                                                               |
| 51707 | + | + | + | + | + | + |               |               | mitochondrial import inner membrane translocase subunit tim-17                |
| 51722 | + | + | + | + | + | + |               |               | C2H2 transcriptional regulator                                                |
| 51734 | + | + | + | + | + | + |               |               | Vesicle coat complex COPI. beta subunit                                       |
| 51806 | + | + | + | + | + | + |               |               | Phosphatidate cytidyltransferase                                              |
| 51846 |   |   |   |   |   |   | 1.113<br>down | 2.358<br>down | Zn2Cys6 transcriptional regulator                                             |
| 51868 | + | + | + | + | + | + |               |               | unknown protein                                                               |
| 51893 |   | + | + |   |   |   |               |               | peroxidase/hem containing                                                     |

|       |   |   |   |   |   |   |               |                |                                                          |
|-------|---|---|---|---|---|---|---------------|----------------|----------------------------------------------------------|
| 51907 | + | + | + |   | + |   |               |                | Zn2Cys6 transcriptional regulator                        |
| 51946 | + | + | + | + | + | + |               |                | aminoacyl-tRNA synthetase                                |
| 51967 | + | + | + | + | + | + |               |                | class I peptide chain release factor.                    |
| 51998 |   |   |   |   |   |   |               |                | amidohydrolase family protein                            |
| 52012 |   |   |   |   |   |   |               |                | unknown protein                                          |
| 52021 | + | + | + | + | + | + |               |                | protein kinase                                           |
| 52050 | + | + | + | + | + | + |               |                | cyclophilin type peptidyl-prolyl cis-trans isomerase/CLD |
| 52055 | + | + | + | + | + | + |               |                | mitochondrial NADP-dependent isocitrate dehydrogenase    |
| 52073 | + | + | + | + | + | + | 2.362<br>down | 2.743<br>down  | sulfatase                                                |
| 52126 | + | + | + | + | + | + |               |                | unknown protein                                          |
| 52130 | + | + | + | + | + | + |               |                | Calcineurin B subunit. Protein phosphatase 2B subunit    |
| 52144 | + | + | + | + | + | + |               |                | serine/threonine protein phosphatase type 5              |
| 52156 | + | + | + | + | + | + |               |                | unknown protein                                          |
| 52165 |   | + | + |   |   |   |               |                | unknown protein. 1 TM                                    |
| 52172 | + | + | + | + | + | + |               |                | unknown protein                                          |
| 52185 | + | + | + | + | + | + |               |                | actin filament-coating protein tropomyosin. putative     |
| 52208 | + | + | + | + | + | + |               |                | Vesicle coat complex COPII. Sec23                        |
| 52222 |   |   |   |   |   |   | 1.733<br>down | 2.984<br>down  | ankyrin repeat domain-containing protein                 |
| 52248 | + | + | + | + | + | + |               |                | ribosomal protein L1.                                    |
| 52267 | + | + | + |   |   |   |               |                | mannitol-1-phosphate dehydrogenase                       |
| 52315 |   |   |   |   |   |   | 1.038<br>down | 1882.167<br>up | copper transporter Ctr                                   |
| 52334 | + | + | + | + | + | + |               |                | BAR domain-containing protein                            |
| 52337 | + | + | + | + | + | + |               |                | Thioredoxin-like protein                                 |
| 52349 | + | + | + | + | + | + |               |                | unknown protein                                          |
| 52368 | + | + | + | + | + | + |               |                | Zn2Cys6 transcriptional regulator                        |
| 52375 | + | + | + | + | + | + |               |                | Aldehyde dehydrogenase                                   |
| 52432 | + |   |   |   |   |   |               |                | Cytochrome P450 CYP2 subfamily                           |

|       |   |   |   |  |  |  |  |  |            |            |  |                                                                          |
|-------|---|---|---|--|--|--|--|--|------------|------------|--|--------------------------------------------------------------------------|
| 52438 |   |   |   |  |  |  |  |  |            |            |  | unknown protein                                                          |
| 52446 |   |   |   |  |  |  |  |  |            |            |  | unknown protein                                                          |
| 52451 |   |   |   |  |  |  |  |  |            |            |  | ER lumen protein retaining receptor Erd2                                 |
| 52456 |   |   |   |  |  |  |  |  |            |            |  | Co-chaperone for Hsp40p                                                  |
| 52463 |   |   |   |  |  |  |  |  |            |            |  | zinc metalloprotease                                                     |
| 52476 |   |   |   |  |  |  |  |  | 38.161 up  | 23.863 up  |  | unknown protein                                                          |
| 52489 |   |   |   |  |  |  |  |  |            |            |  | cytosin/purin permease                                                   |
| 52499 |   |   |   |  |  |  |  |  | 1.035 down | 2.786 down |  | C2H2 transcriptional regulator                                           |
| 52505 |   |   |   |  |  |  |  |  | 1.315 up   | 2.034 up   |  | unknown protein                                                          |
| 52520 |   |   |   |  |  |  |  |  |            |            |  | Cyclin                                                                   |
| 52521 |   |   |   |  |  |  |  |  |            |            |  | unknown protein                                                          |
| 52532 |   |   |   |  |  |  |  |  |            |            |  | unknown protein                                                          |
| 52537 |   |   |   |  |  |  |  |  |            |            |  | unknown protein                                                          |
| 52539 |   |   |   |  |  |  |  |  |            |            |  | unknown protein                                                          |
| 52550 |   |   |   |  |  |  |  |  |            |            |  | Epsin-like protein.Ent2. involved inEndocytosis and actin patch assembly |
| 52553 |   |   |   |  |  |  |  |  |            |            |  | unknown protein                                                          |
| 52587 |   |   |   |  |  |  |  |  |            |            |  | unknown protein                                                          |
| 52665 |   |   |   |  |  |  |  |  |            |            |  | Peptidase C19. ubiquitin carboxyl-terminal hydrolase 2. putative         |
| 52670 |   |   |   |  |  |  |  |  |            |            |  | Mitochondrial carrier protein                                            |
| 52701 |   |   |   |  |  |  |  |  |            |            |  | unknown protein                                                          |
| 52709 |   |   |   |  |  |  |  |  |            |            |  | unknown protein                                                          |
| 52718 |   |   |   |  |  |  |  |  |            |            |  | short chain dehydrognease/reductase                                      |
| 52763 |   | + |   |  |  |  |  |  |            |            |  | 60s ribosomal protein L29 based on homology to the L29 protein of yeast. |
| 52829 |   |   |   |  |  |  |  |  |            |            |  | serine incorporator                                                      |
| 52839 |   |   |   |  |  |  |  |  |            |            |  | unknown protein                                                          |
| 52841 |   |   |   |  |  |  |  |  |            |            |  | Zn2Cys6 transcriptional regulator                                        |
| 52847 | + | + | + |  |  |  |  |  |            |            |  | NADH-ubiquinone oxidoreductase 299 kDa subunit. putative                 |
| 52875 |   |   |   |  |  |  |  |  | 1.522 down | 3.806 down |  | Zn2Cys6 transcriptional regulator                                        |

|       |   |   |   |   |   |   |            |            |  |                                                                      |
|-------|---|---|---|---|---|---|------------|------------|--|----------------------------------------------------------------------|
| 52924 |   |   | + |   |   |   |            |            |  | transcriptional activator. zinc finger. NF-X1-type                   |
| 52956 |   |   | + |   |   |   |            |            |  | 3'-5' exonuclease                                                    |
| 52960 |   |   |   |   |   |   |            |            |  | unknown protein                                                      |
| 52972 |   |   |   |   |   |   |            |            |  | unknown protein                                                      |
| 52976 | + | + | + | + | + | + |            |            |  | nucleolar RNA binding protein NifK                                   |
| 52979 | + | + | + |   |   |   |            |            |  | unknown protein                                                      |
| 53004 | + | + | + | + | + | + | 1.103 up   | 2.307 down |  | protein tyrosine phosphatase activity. M phase of mitotic cell cycle |
| 53025 |   |   |   |   |   |   |            |            |  | SAM-dependent methyltransferase                                      |
| 53027 | + | + | + | + | + | + |            |            |  | unknown protein                                                      |
| 53029 |   |   |   |   |   |   | 1.115 down | 2.011 up   |  | β-lactamase-like protein                                             |
| 53046 | + | + | + | + | + | + |            |            |  | Endoplasmic reticulum vesicle protein. Erv25                         |
| 53053 |   |   |   |   |   |   | 4.738 up   | 5.307 up   |  | unknown protein                                                      |
| 53067 |   |   |   |   |   |   |            |            |  | Zn2Cys6 transcriptional regulator                                    |
| 53076 | + | + | + | + | + | + |            |            |  | unknown protein                                                      |
| 53079 |   |   |   |   |   |   | 4.105 down | 5.546 down |  | NADP/FAD dependent oxidoreductase                                    |
| 53080 | + | + | + | + | + | + |            |            |  | unknown protein                                                      |
| 53091 |   |   |   |   |   |   |            |            |  | Threonine/serine dehydratases                                        |
| 53103 | + | + | + | + | + | + |            |            |  | cyclophilin-type peptidyl-prolyl cis-trans isomerase                 |
| 53105 | + | + | + | + | + | + |            |            |  | DNA polymerase alpha catalytic subunit                               |
| 53106 |   |   |   |   |   |   |            |            |  | Zn2Cys6 transcriptional regulator                                    |
| 53123 | + | + | + | + | + | + |            |            |  | dihydrodipicolinate synthase. putative                               |
| 53125 | + | + | + | + | + | + |            |            |  | Mitochondrial substrate carrier                                      |
| 53133 | + | + | + | + | + | + |            |            |  | unknown protein                                                      |
| 53153 |   |   |   |   |   |   | 1.092 down | 2.593 down |  | unknown protein                                                      |
| 53167 |   |   |   |   |   |   |            |            |  | unknown protein                                                      |
| 53168 |   |   |   |   |   |   | 1.024 down | 3.572 up   |  | Cytochrome P450. putative                                            |



|       |  |   |   |   |   |   |   |            |            |                                                                                          |
|-------|--|---|---|---|---|---|---|------------|------------|------------------------------------------------------------------------------------------|
| 53169 |  | + |   |   |   |   |   |            |            | Catalytic (alpha) subunit of C-terminal domain kinase I (CTDK-I)                         |
| 53172 |  |   |   |   |   |   |   |            |            | lariat debranching enzyme domain-containing protein                                      |
| 53186 |  |   |   |   |   |   |   | 1.317 up   | 4.326 up   | PL20 glucuronan lyase A                                                                  |
| 53187 |  | + | + |   |   |   |   |            |            | UreD urease accessory protein                                                            |
| 53220 |  |   |   |   |   |   |   |            |            | unknown protein                                                                          |
| 53226 |  | + | + | + | + | + | + |            |            | unknown protein                                                                          |
| 53238 |  | + |   | + |   |   |   |            |            | GPCR. secretin like                                                                      |
| 53239 |  |   |   |   |   |   |   |            |            | unknown protein                                                                          |
| 53246 |  | + | + | + | + |   |   |            |            | unknown protein                                                                          |
| 53254 |  | + | + | + | + | + | + |            |            | Signal peptidase Sec11                                                                   |
| 53259 |  | + | + | + | + | + | + |            |            | unknown protein                                                                          |
| 53267 |  |   |   |   |   |   |   |            |            | unknown protein. only in fungi                                                           |
| 53282 |  |   |   |   |   |   |   | 1.047 down | 2.361 up   | NAD(P)H-dependent FMN reductase LOT6. putative                                           |
| 53286 |  | + | + | + | + | + | + |            |            | 3' exoribonuclease family protein                                                        |
| 53302 |  |   |   |   |   |   |   |            |            | unknown protein                                                                          |
| 53314 |  |   |   |   |   |   |   | 1.507 up   | 2.126 up   | unknown protein                                                                          |
| 53316 |  | + | + | + | + | + | + |            |            | TRAPP complex component Bet5                                                             |
| 53318 |  | + | + | + | + | + | + |            |            | cytochrome c oxidase subunit Va                                                          |
| 53331 |  |   |   |   |   |   |   |            |            | short chain dehydrogenase/reductase                                                      |
| 53334 |  | + | + | + |   |   |   | 1.530 up   | 2.122 up   | unknown protein                                                                          |
| 53342 |  | + | + | + | + | + | + |            |            | Peroxin-3                                                                                |
| 53343 |  | + | + | + | + | + | + |            |            | Zinc-dependent metalloprotease. ADAM_fungal subgroup                                     |
| 53349 |  | + | + | + | + | + | + |            |            | Histidine kinase. part of a two-component phosphorelay system involved in signal transdu |
| 53350 |  | + | + | + | + | + | + |            |            | 39S ribosomal protein L53/MRP-L53. putative                                              |
| 53360 |  |   |   |   |   |   |   | 1.942 down | 2.594 down | SSCRP                                                                                    |
| 53366 |  | + | + | + | + |   | + | 1.353 up   | 2.151 up   | translation initiation protein Sua5p.                                                    |
| 53372 |  | + |   | + | + |   | + | 2.753 down | 2.231 down | acyltransferase 3                                                                        |

|       |   |   |   |   |   |   |   |               |               |                                                                                                    |
|-------|---|---|---|---|---|---|---|---------------|---------------|----------------------------------------------------------------------------------------------------|
| 53373 |   | + | + | + | + | + | + | 1.248<br>down | 3.435<br>down | CoA-transferase family III                                                                         |
| 53378 |   |   |   |   |   |   |   | 1.733 up      | 3.298 up      | siderophore transporter                                                                            |
| 53381 |   |   |   |   |   |   |   |               |               | SNF2 family DNA-dependent ATPase domain-containing protein                                         |
| 53395 |   | + | + | + | + | + | + |               |               | unknown protein                                                                                    |
| 53401 |   |   |   |   |   |   |   | 1.200 up      | 2.706<br>down | unknown protein                                                                                    |
| 53402 |   | + | + | + | + | + | + |               |               | Serine/threonine protein kinase                                                                    |
| 53428 |   |   |   |   |   |   |   | 1.005 up      | 9.099<br>down | SAM-dependent methyltransferase                                                                    |
| 53430 |   |   | + |   |   |   |   |               |               | Flavoprotein monooxygenase.                                                                        |
| 53431 |   | + |   |   |   |   |   |               |               | unknown protein                                                                                    |
| 53434 |   |   |   |   |   |   |   |               |               | MFS permease                                                                                       |
| 53437 |   | + | + | + | + | + | + |               |               | RNA polymerase II-associated protein.                                                              |
| 53443 |   | + | + | + | + | + | + |               |               | unknown protein                                                                                    |
| 53446 |   | + | + | + | + | + | + |               |               | RRP9. encoding a protein involved in pre-rRNA processing. associated with U3 snRNP; com            |
| 53452 | + |   |   |   |   |   |   | 1.070 up      | 3.399 up      | unknown protein                                                                                    |
| 53462 |   | + | + | + | + | + | + |               |               | unknown protein                                                                                    |
| 53468 |   |   |   |   |   |   |   |               |               | Lif1p of <i>Saccharomyces cerevisiae</i> . a protein involved in DNA double strand break repair; p |
| 53475 |   |   |   | + |   |   |   | 2.083<br>down | 2.851<br>down | MFS permease                                                                                       |
| 53481 |   | + | + | + | + | + | + |               |               | unknown protein                                                                                    |
| 53484 |   | + | + | + | + | + | + |               |               | transcriptional regulator transcriptional regulator APSES type                                     |
| 53492 |   | + | + | + | + | + | + |               |               | unknown protein                                                                                    |
| 53495 |   |   |   |   |   |   |   |               |               | unknown protein                                                                                    |
| 53498 |   | + | + | + |   |   |   |               |               | ubiquitin related modifier 1                                                                       |
| 53499 |   |   |   |   |   |   |   |               |               | unknown protein                                                                                    |
| 53500 |   | + | + | + | + |   |   | 1.012<br>down | 6.223<br>down | unknown protein                                                                                    |
| 53501 |   | + | + | + |   |   |   | 1.921<br>down | 2.097<br>down | unknown protein                                                                                    |

|       |   |   |   |   |   |   |            |            |                                                                                       |
|-------|---|---|---|---|---|---|------------|------------|---------------------------------------------------------------------------------------|
| 53503 |   |   |   |   |   |   |            |            | unknown protein                                                                       |
| 53525 | + | + | + |   |   |   | 1.224 up   | 2.126 up   | unknown protein (tyrosin phosphatase domain)                                          |
| 53526 |   | + |   |   |   |   |            |            | Zinc-containing alcohol dehydrogenase                                                 |
| 53529 | + | + | + | + | + | + |            |            | low temperature viability protein                                                     |
| 53535 | + | + | + | + | + | + |            |            | v-SNARE Sec20                                                                         |
| 53542 | + | + | + | + | + | + | 1.254 down | 2.746 down | GH76 $\alpha$ -1.6-mannanase                                                          |
| 53554 | + | + | + | + | + | + |            |            | 20S proteasome beta-type subunit Pre1                                                 |
| 53558 |   |   |   |   |   |   |            |            | MDR-type ABC transporters                                                             |
| 53561 |   |   |   |   |   |   | 2.483 down | 4.876 down | unknown protein                                                                       |
| 53562 | + | + | + | + | + | + |            |            | rho4                                                                                  |
| 53567 | + | + | + | + | + | + |            |            | glutathione reductase                                                                 |
| 53569 | + | + | + | + |   | + |            |            | light-regulation protein. related to Drosophila TIMELESS                              |
| 53570 |   |   |   |   |   |   |            |            | unknown protein                                                                       |
| 53576 | + | + | + | + | + | + |            |            | unknown protein                                                                       |
| 53585 | + | + | + | + | + | + |            |            | transcriptional regulator. unknown                                                    |
| 53596 | + | + | + | + | + | + | 1.330 up   | 2.044 up   | unknown protein                                                                       |
| 53601 | + | + | + | + | + | + |            |            | Synaptobrevin/VAMP-like protein                                                       |
| 53605 |   |   |   |   |   |   |            |            | unknown protein                                                                       |
| 53611 |   |   |   |   |   |   | 2.105 down | 4.822 down | MFS permease                                                                          |
| 53615 | + | + | + | + | + | + | 1.383 down | 2.620 down | unknown protein with WD repeats                                                       |
| 53628 | + | + | + | + | + | + |            |            | histone H3 methyltransferase complex and RNA cleavage factor II complex. subunit SWD2 |
| 53647 | + | + | + | + | + | + |            |            | serine/threonine-protein kinase hal4                                                  |
| 53659 | + | + | + | + | + | + |            |            | DNA repair protein (Tof1)                                                             |
| 53660 |   |   |   |   |   |   |            |            | DEAD/DEAH box helicase                                                                |
| 53665 |   |   |   |   |   |   | 1.329 up   | 4.049 up   | unknown protein                                                                       |
| 53669 | + | + | + | + | + | + |            |            | eukaryotic translation initiation factor 3 subunit F                                  |

|       |   |   |   |   |   |   |               |                |                                                          |
|-------|---|---|---|---|---|---|---------------|----------------|----------------------------------------------------------|
| 53672 | + | + | + | + | + | + | 1.729<br>down | 2.741<br>down  | unknown protein                                          |
| 53673 |   |   |   |   |   |   | 1.835<br>down | 2.072 up       | NADP:D-xylose dehydrogenase [ <i>Hypocrea jecorina</i> ] |
| 53684 |   |   |   |   |   |   |               |                | unknown protein                                          |
| 53685 | + | + | + | + | + | + |               |                | phosphodiesterase/nucleotide pyrophosphatase type 1      |
| 53701 | + | + |   |   |   |   | 1.149 up      | 2.411 up       | unknown protein                                          |
| 53721 |   |   |   |   |   |   |               |                | DNA replication complex GINS protein SLD5. putative      |
| 53722 | + | + | + | + | + | + |               |                | unknown protein                                          |
| 53728 | + | + | + | + | + | + |               |                | inorganic pyrophosphatase                                |
| 53731 | + | + | + |   |   |   |               |                | GH5 endo- $\beta$ -1.4-glucanase                         |
| 53747 |   |   |   |   |   |   | 1.468 up      | 2.879<br>down  | unknown protein                                          |
| 53776 |   |   |   |   |   |   |               |                | Protein kinase                                           |
| 53777 |   |   |   |   |   |   | 2.621<br>down | 10.284<br>down | unknown protein                                          |
| 53785 | + | + | + | + | + | + |               |                | unknown protein                                          |
| 53796 | + | + | + | + | + | + |               |                | unknown protein                                          |
| 53811 | + | + | + | + | + | + |               |                | unknown protein                                          |
| 53812 | + | + | + | + | + | + |               |                | unknown protein                                          |
| 53815 |   |   |   |   |   |   |               |                | isochorismatase family hydrolase. putative               |
| 53818 |   |   |   |   |   |   |               |                | ABC transporter superfamily?!                            |
| 53824 |   |   |   |   |   |   | 9.191<br>down | 4.343<br>down  | unknown secreted protein                                 |
| 53848 | + | + | + | + | + | + |               |                | unknown protein                                          |
| 53858 |   |   |   |   |   |   |               |                | unknown protein                                          |
| 53859 |   |   |   |   |   |   | 1.176<br>down | 3.203<br>down  | C-4 sterol methyl oxidase                                |
| 53862 |   |   |   |   |   |   | 1.501 up      | 3.430 up       | unknown protein with WD repeats                          |
| 53863 |   |   |   |   |   |   | 1.246<br>down | 2.616 up       | Flavoprotein monooxygenase                               |

|       |   |   |   |   |   |   |                |               |                                                                                    |
|-------|---|---|---|---|---|---|----------------|---------------|------------------------------------------------------------------------------------|
| 53868 |   |   |   |   |   |   | 1.960<br>down  | 3.207<br>down | NADH:flavin oxidoreductase/NADH oxidase                                            |
| 53870 | + | + | + | + | + | + |                |               | unknown protein                                                                    |
| 53872 |   |   |   |   |   |   |                |               | Dihydroxy-acid dehydratase                                                         |
| 53877 |   | + |   |   |   |   |                |               | Zn2Cys6 transcriptional regulator                                                  |
| 53888 | + | + | + | + | + | + | 1.981<br>down  | 2.663<br>down | pirin                                                                              |
| 53893 | + | + | + | + | + | + |                |               | unknown protein                                                                    |
| 53900 |   |   |   |   |   |   |                |               | unknown protein                                                                    |
| 53902 | + | + | + | + | + | + |                |               | histidine kinase class IV Fos-1                                                    |
| 53903 |   |   |   |   |   |   | 1.980<br>down  | 8.402<br>down | MFS permease                                                                       |
| 53939 |   |   |   |   |   |   | 1.238 up       | 2.099<br>down | DNA polymerase y family member involved in translesion synthesis during DNA repair |
| 53947 | + | + | + | + | + | + |                |               | HFBs                                                                               |
| 53952 | + | + | + | + | + | + |                |               | unknown protein                                                                    |
| 53956 | + | + | + |   |   | + | 1.231 up       | 2.129<br>down | unknown protein                                                                    |
| 53961 |   |   |   |   |   |   | 13.697<br>down | 8.413<br>down | Aspartyl protease                                                                  |
| 53964 |   |   |   |   |   |   | 1.471 up       | 6.049 up      | oxalate decarboxylase                                                              |
| 53972 | + | + | + | + | + | + |                |               | ATP-dependent RNA helicase DBP8 (EC 3.6.4.13)                                      |
| 53981 | + | + | + | + | + | + |                |               | unknown protein                                                                    |
| 53986 |   |   |   |   |   |   |                |               | deunknown proteinribonuclease TatD                                                 |
| 53989 |   |   |   |   |   |   | 1.298<br>down  | 2.593<br>down | pfkB family kinase. putative                                                       |
| 53995 |   |   |   |   |   |   |                |               | RAI1                                                                               |
| 54005 |   |   |   |   |   |   |                |               | MFS permease                                                                       |
| 54007 |   |   |   |   |   |   |                |               | transcriptional regulator HMG type                                                 |
| 54036 |   |   |   |   |   |   |                |               | MFS permease                                                                       |
| 54042 | + | + | + | + | + | + |                |               | Component of oligomeric golgi complex Cog4/Sec38                                   |

|       |   |   |   |   |   |   |               |               |                                                                               |
|-------|---|---|---|---|---|---|---------------|---------------|-------------------------------------------------------------------------------|
| 54048 |   |   |   |   |   |   | 2.510<br>down | 5.314<br>down | unknown protein                                                               |
| 54052 |   |   |   |   |   |   | 2.977 up      | 18.694 up     | unknown protein                                                               |
| 54064 |   | + | + | + | + | + |               |               | mitochondrial ATP-dependent RNA-helicase mrh4                                 |
| 54071 |   |   |   |   |   |   |               |               | NAD+ synthetases/Nitrilase/cyanide hydratase/apolipoprotein N-acyltransferase |
| 54086 |   |   |   |   |   |   |               |               | short chain dehydrogenase/reductase                                           |
| 54089 |   |   |   |   |   |   | 1.367 up      | 3.852 up      | unknown protein                                                               |
| 54128 |   |   |   |   |   |   | 1.056<br>down | 2.477<br>down | IlvA Threonine dehydratase                                                    |
| 54129 |   |   |   |   |   |   |               |               | Heme peroxidase. unknown in Sordariomycetes                                   |
| 54134 |   |   |   |   |   |   |               |               | unknown protein                                                               |
| 54144 |   |   |   |   |   | + | 1.097<br>down | 3.141 up      | ferric reductase                                                              |
| 54157 |   |   |   |   |   | + |               |               | unknown protein                                                               |
| 54160 |   |   |   |   |   |   | 1.095<br>down | 3.539 up      | GliI [Aspergillus fumigatus]                                                  |
| 54166 |   |   |   |   |   |   | 1.179<br>down | 2.905<br>down | Cytochrome P450                                                               |
| 54171 |   |   |   |   |   |   |               |               | unknown protein                                                               |
| 54179 |   |   |   |   |   |   | 1.067 up      | 2.827 up      | glutathione S-transferase                                                     |
| 54181 |   | + | + | + | + | + |               |               | siroheme synthase                                                             |
| 54195 |   | + | + | + | + | + |               |               | Cyclin-K . putative                                                           |
| 54198 |   | + | + | + |   |   |               |               | unknown protein                                                               |
| 54202 |   | + | + | + | + | + | 1.098<br>down | 2.275<br>down | unknown protein. contains DUF155 domain                                       |
| 54208 |   |   |   |   |   |   |               |               | unknown protein                                                               |
| 54219 |   |   |   |   |   |   |               |               | CE5 acetyl xylan esterase                                                     |
| 54223 | + | + | + |   |   |   |               |               | short chain dehydrogenase/reductase                                           |
| 54226 |   |   |   |   |   |   | 1.394<br>down | 2.478 up      | unknown protein                                                               |
| 54227 |   |   |   |   |   |   | 9.221<br>down | 7.643<br>down | short-chain dehydrogenase/reductase                                           |

|       |   |   |   |   |   |   |               |                |                                                             |
|-------|---|---|---|---|---|---|---------------|----------------|-------------------------------------------------------------|
| 54230 |   |   |   |   |   |   | 1.777<br>down | 3.192<br>down  | NACHT domain WD40 repeat-containing protein. related to HET |
| 54239 |   |   |   |   |   |   | 4.733<br>down | 3.356<br>down  | Multicopper oxidases                                        |
| 54242 |   |   |   |   |   |   |               |                | GH55 $\beta$ -1.3-glucanase                                 |
| 54244 |   |   |   |   |   |   |               |                | unknown protein                                             |
| 54256 | + | + | + | + | + | + |               |                | RNA binding protein                                         |
| 54260 |   |   |   |   |   |   |               |                | potential indoleamine 2.3-dioxygenase                       |
| 54283 | + | + | + | + | + | + |               |                | Utp18p. a component of the SSU processome                   |
| 54285 | + | + | + | + | + | + | 1.239<br>down | 2.840<br>down  | unknown protein                                             |
| 54329 | + | + | + | + | + | + |               |                | unknown protein                                             |
| 54330 | + | + | + | + | + | + |               |                | Member of SIR2 proteins                                     |
| 54335 | + | + | + | + | + | + | 1.329<br>down | 2.742<br>down  | unknown protein                                             |
| 54349 | + | + | + | + | + | + | 1.637 up      | 3.184 up       | small nuclear ribonucleoprotein F                           |
| 54352 |   |   |   |   |   |   | 2.527<br>down | 13.359<br>down | unknown protein.                                            |
| 54365 | + | + | + | + | + | + |               |                | Amino acid transporter                                      |
| 54366 |   |   |   |   |   |   | 1.169<br>down | 2.940<br>down  | ceramidase. nonlysosomal                                    |
| 54372 |   |   |   |   |   |   |               |                | unknown protein                                             |
| 54384 | + | + | + | + | + | + |               |                | unknown protein                                             |
| 54391 |   | + |   |   |   |   |               |                | unknown protein                                             |
| 54393 |   |   |   |   |   |   |               |                | unknown protein                                             |
| 54395 | + | + | + | + |   | + |               |                | Transcriptional regulator FlbA                              |
| 54407 | + | + | + | + | + | + |               |                | unknown protein                                             |
| 54408 | + | + | + | + | + | + |               |                | guanylate kinase. putative                                  |
| 54419 |   | + |   |   |   |   |               |                | RNase3 domain-containing protein                            |
| 54426 |   |   |   |   |   |   | 1.145 up      | 2.457 up       | unknown protein                                             |
| 54427 | + | + | + |   |   |   |               |                | unknown protein                                             |

|       |   |   |   |   |   |   |               |               |                                                                                                                      |
|-------|---|---|---|---|---|---|---------------|---------------|----------------------------------------------------------------------------------------------------------------------|
| 54437 |   |   |   |   |   |   |               |               | Zn2Cys6 transcriptional regulator                                                                                    |
| 54441 | + | + | + | + | + | + |               |               | HECT-domain-containing protein                                                                                       |
| 54444 |   |   |   |   |   |   | 1.005<br>down | 3.004<br>down | unknown protein                                                                                                      |
| 54448 |   |   |   |   |   |   |               |               | deunknown proteinhypusine synthase                                                                                   |
| 54450 | + | + | + | + | + | + |               |               | mRNA capping enzyme                                                                                                  |
| 54454 | + | + | + | + | + | + |               |               | 26S proteasome regulatory complex subunit Rpn6                                                                       |
| 54458 |   | + |   |   |   |   |               |               | unknown protein                                                                                                      |
| 54461 |   |   |   |   |   |   | 1.056<br>down | 7.740 up      | MFS permease                                                                                                         |
| 54462 |   |   |   |   |   |   | 1.567 up      | 3.654 up      | unknown protein                                                                                                      |
| 54469 | + | + | + | + | + | + | 1.174<br>down | 2.646<br>down | Vacuolar transporter chaperone 4 (vtc4). putative                                                                    |
| 54471 | + | + | + | + | + | + |               |               | unknown protein                                                                                                      |
| 54487 |   |   |   |   |   |   |               |               | unknown protein                                                                                                      |
| 54502 |   |   |   |   |   |   |               |               | Zn2Cys6 transcriptional regulator                                                                                    |
| 54508 |   |   |   |   |   |   |               |               | Molybdopterin synthase catalytic subunit                                                                             |
| 54511 |   |   |   |   |   |   |               |               | unknown protein. contains BTB/POZ domain (=protein binding)                                                          |
| 54514 | + | + | + | + | + | + |               |               | unknown protein                                                                                                      |
| 54521 | + | + | + | + | + | + |               |               | ATP binding protein                                                                                                  |
| 54525 | + | + | + | + | + | + |               |               | AldedhAldehyde dehydrogenase family                                                                                  |
| 54535 | + | + | + | + | + | + |               |               | unknown protein                                                                                                      |
| 54541 | + | + | + | + | + | + |               |               | protein for structural maintenance of chromosome protein 3 (sister chromatid cohesion complex Cohesin. subunit SMC3) |
| 54550 | + | + | + | + | + |   | 1.001<br>down | 2.149<br>down | short chain dehydrognease/reductase                                                                                  |
| 54554 | + | + | + | + | + | + |               |               | GTP cyclohydrolase 1                                                                                                 |
| 54564 | + | + | + | + |   |   |               |               | Pro_dhProline dehydrogenase aligned                                                                                  |
| 54567 | + | + | + | + | + | + |               |               | Zn2Cys6 transcriptional regulator                                                                                    |
| 54583 | + | + | + |   |   |   |               |               | unknown protein                                                                                                      |
| 54589 | + | + | + | + | + | + |               |               | type 2A phosphatase activator TIP41                                                                                  |



|       |   |   |   |   |   |   |            |             |                                                                                         |
|-------|---|---|---|---|---|---|------------|-------------|-----------------------------------------------------------------------------------------|
| 54596 | + | + | + | + | + | + |            |             | unknown protein                                                                         |
| 54598 | + | + | + | + | + | + |            |             | snf5/smarcb1/ini1                                                                       |
| 54611 | + | + | + | + | + | + | 1.086 up   | 3.175 up    | unknown protein                                                                         |
| 54615 | + | + | + | + | + | + |            |             | unknown protein                                                                         |
| 54616 |   |   |   |   |   |   |            |             | unknown protein                                                                         |
| 54622 | + |   | + |   |   |   | 2.553 down | 4.686 up    | unknown protein                                                                         |
| 54632 | + | + | + |   |   |   |            |             | MFS permease                                                                            |
| 54633 | + | + | + | + | + | + | 1.339 down | 2.183 down  | GT β-glycosyltransferases                                                               |
| 54659 |   |   |   |   |   |   | 1.315 down | 3.606 down  | unknown protein                                                                         |
| 54667 |   |   |   |   |   |   | 6.311 up   | 11.946 up   | acyl-CoA synthetase                                                                     |
| 54669 | + | + | + | + | + | + | 1.552 up   | 9.480 up    | Golgi matrix protein. rud3. involved in the structural organization of the cis-Golgi    |
| 54670 | + | + | + | + | + | + |            |             | SWI-SNF complex subunit (Snf5). putative                                                |
| 54674 | + | + | + | + | + | + | 1.375 up   | 2.033 down  | unknown protein                                                                         |
| 54675 |   |   | + |   |   |   |            |             | Transcriptional regulator PacG/VIB-1                                                    |
| 54676 | + | + | + | + | + | + | 1.169 up   | 2.232 up    | COX17. cytochrome C oxidase assembly protein                                            |
| 54683 | + | + | + | + | + | + |            |             | oxysterol binding protein. contains an Ankyrin and a Pleckstrin-homology related domain |
| 54686 | + | + | + | + | + | + |            |             | unknown protein                                                                         |
| 54694 |   |   |   |   |   |   | 4.224 down | 10.692 down | aryl-alcohol dehydrogenases                                                             |
| 54703 | + | + | + | + |   | + | 2.647 down | 2.513 down  | C2H2 transcriptional regulator                                                          |
| 54709 | + | + | + | + | + | + |            |             | cell cycle control protein cwf14                                                        |
| 54710 | + | + | + | + | + | + |            |             | unknown protein                                                                         |
| 54722 |   | + | + | + |   | + |            |             | unknown protein                                                                         |
| 54723 |   |   |   |   |   |   | 1.025 down | 2.698 up    | SSCRP                                                                                   |
| 54736 | + | + | + | + | + | + |            |             | ATP-dependent RNA helicase ded-1                                                        |

|       |  |   |   |   |   |   |               |               |                                       |
|-------|--|---|---|---|---|---|---------------|---------------|---------------------------------------|
| 54761 |  |   |   |   |   |   | 3.862<br>down | 3.324 up      | quercetin 2.3-diunknown proteingenase |
| 54768 |  |   |   |   |   |   | 6.432 up      | 4.254 up      | unknown protein                       |
| 54784 |  |   |   |   |   |   | 1.049 up      | 3.593 up      | unknown protein                       |
| 54789 |  |   |   |   |   |   | 1.464 up      | 3.105 up      | short chain dehydrogenase/reductase   |
| 54790 |  |   |   |   |   |   | 1.395<br>down | 3.263<br>down | unknown protein                       |
| 54809 |  |   |   |   |   |   |               |               | bicarbonate transporter               |
| 54813 |  |   | + |   |   |   |               |               | unknown protein                       |
| 54819 |  |   |   |   |   |   |               |               | unknown protein                       |
| 54846 |  |   |   |   |   |   | 1.025<br>down | 3.366<br>down | half-sized ABC transporter            |
| 54850 |  |   |   |   |   |   |               |               | AT DNA binding protein. putative      |
| 54852 |  | + | + | + | + | + |               |               | SYF2 splicing factor                  |
| 54858 |  |   |   | + |   |   |               |               | unknown protein                       |
| 54865 |  | + | + | + | + |   |               |               | Amino acid transporters               |
| 54868 |  | + | + | + | + | + |               |               | unknown protein                       |
| 54870 |  |   |   |   |   |   | 1.025<br>down | 2.143<br>down | acetate—CoA ligase                    |
| 54886 |  |   |   |   |   |   |               |               | unknown protein                       |
| 54890 |  | + | + | + | + | + |               |               | unknown protein                       |
| 54893 |  |   |   |   |   |   | 1.138 up      | 2.349<br>down | unknown protein                       |
| 54902 |  |   |   |   |   |   | 1.062 up      | 3.137<br>down | unknown protein                       |
| 54926 |  |   |   |   |   |   |               |               | unknown protein                       |
| 54954 |  |   |   |   |   |   | 1.163<br>down | 2.740<br>down | MRP-type ABC transporter              |
| 54961 |  | + | + | + | + | + |               |               | unknown protein                       |
| 54962 |  |   |   |   |   |   |               |               | iron transporter                      |
| 54972 |  |   |   |   |   |   | 3.231<br>down | 7.847<br>down | MFS permease                          |

|       |   |   |   |   |   |   |               |               |                                                                            |
|-------|---|---|---|---|---|---|---------------|---------------|----------------------------------------------------------------------------|
| 54991 |   |   |   |   |   |   |               |               | short chain dehydrogenase/reductase                                        |
| 54997 |   |   |   |   |   |   |               |               | isoamyl alcohol oxidase                                                    |
| 54999 |   | + |   |   |   |   |               |               | MFS permease                                                               |
| 55005 |   | + | + |   |   |   |               |               | GT22 ALG9 mannosyltransferase                                              |
| 55029 | + | + | + | + | + | + |               |               | rRNA processing protein Rrp8                                               |
| 55034 | + | + | + | + | + | + | 1.932<br>down | 3.027<br>down | unknown protein                                                            |
| 55036 |   |   |   |   |   |   | 2.055 up      | 3.968 up      | unknown protein                                                            |
| 55039 |   | + |   |   |   |   | 3.534 up      | 3.347 up      | unknown protein                                                            |
| 55041 |   |   |   |   |   |   | 1.115<br>down | 2.113<br>down | unknown protein                                                            |
| 55049 |   |   |   |   |   |   |               |               | casein kinase 1 delta                                                      |
| 55052 |   |   |   |   |   |   |               |               | unknown protein                                                            |
| 55055 | + | + | + | + | + | + |               |               | MTHFRMethylenetetrahydrofolate reductase                                   |
| 55060 | + | + | + | + | + | + | 2.487 up      | 2.002 up      | kinesin heavy chain                                                        |
| 55062 |   |   |   |   |   |   |               |               | unique protein                                                             |
| 55067 | + | + | + | + | + | + |               |               | import inner membrane translocase subunit tim-21. mitochondrial . putative |
| 55073 | + | + | + | + | + | + |               |               | spo7                                                                       |
| 55077 |   |   |   |   |   |   |               |               | MFS permease                                                               |
| 55088 | + | + | + | + | + | + |               |               | NADH-ubiquinone oxidoreductase 18 kDa subunit. putative                    |
| 55099 |   |   |   |   |   |   |               |               | polynucleotide adenylyltransferase.                                        |
| 55105 |   |   |   |   |   |   | 1.935<br>down | 2.440<br>down | Zn2Cys6 transcriptional regulator                                          |
| 55114 | + | + | + | + | + | + |               |               | Nucleoside diphosphatase involved in protein glycosylation in the Golgi    |
| 55123 |   |   |   |   |   |   |               |               | unknown protein                                                            |
| 55125 | + | + | + | + | + | + |               |               | unknown protein                                                            |
| 55126 |   |   |   |   |   |   | 2.304<br>down | 2.382<br>down | unknown protein                                                            |
| 55161 |   |   |   |   |   |   |               |               | D-lactate dehydrogenase. mitochondrial precursor                           |
| 55172 | + | + | + | + | + | + | 1.324 up      | 3.179 up      | unknown protein                                                            |
| 55179 |   |   |   |   |   |   |               |               | Arginase family protein                                                    |

|       |   |   |   |   |   |   |               |               |                                              |
|-------|---|---|---|---|---|---|---------------|---------------|----------------------------------------------|
| 55180 | + | + | + | + | + | + |               |               | unknown protein                              |
| 55183 | + | + | + | + | + | + |               |               | unknown protein                              |
| 55185 | + | + | + | + | + | + |               |               | RNA polymerase Rpb5                          |
| 55190 |   |   |   |   |   |   |               |               | aminotransferase                             |
| 55191 | + | + | + | + | + | + |               |               | inner membrane magnesium transporter MRS2    |
| 55193 |   |   |   |   |   |   | 2.101<br>down | 2.923<br>down | unknown protein                              |
| 55201 |   |   |   |   |   |   |               |               | histone H4. putative                         |
| 55204 | + | + | + | + | + | + |               |               | vacuolar ATP synthase subunit F              |
| 55205 | + | + | + | + | + | + |               |               | unknown protein                              |
| 55208 | + | + | + | + | + | + |               |               | maintenance of ploidy protein mob1           |
| 55213 | + | + | + |   |   |   | 1.066 up      | 2.472<br>down | tRNA-specific adenosine deaminase            |
| 55224 | + | + | + | + | + | + |               |               | unknown protein                              |
| 55226 |   | + | + |   |   |   |               |               | unknown protein                              |
| 55237 | + | + | + | + | + | + |               |               | unknown protein                              |
| 55240 |   |   |   |   |   |   | 6.843<br>down | 3.475<br>down | large-conductance mechanosensitive channel   |
| 55242 | + | + | + | + | + | + |               |               | unknown protein                              |
| 55245 |   |   |   |   |   |   |               |               | ribokinase                                   |
| 55252 |   |   |   |   |   |   |               |               | unknown protein                              |
| 55263 | + | + | + | + | + | + |               |               | ubiquitin-conjugating enzyme                 |
| 55272 |   |   |   |   |   |   | 2.401 up      | 2.322 up      | unknown protein                              |
| 55274 |   | + | + |   |   | + |               |               | Zn2Cys6 transcriptional regulator            |
| 55276 |   |   |   |   |   |   |               |               | thioesterase superfamily protein             |
| 55279 | + | + | + | + | + | + | 1.618<br>down | 2.786<br>down | unknown protein                              |
| 55306 |   |   |   |   |   |   |               |               | Acyl-CoA synthetase                          |
| 55318 | + | + | + | + | + | + |               |               | fatty acid elongase-like protein             |
| 55319 |   |   |   |   |   |   |               |               | GH54 $\alpha$ -L-arabinofuranosidase ABF3    |
| 55321 | + | + | + | + | + | + |               |               | phosphatidylinositolglycan class N. putative |

|       |   |  |   |   |   |   |   |   |               |               |                                                                     |
|-------|---|--|---|---|---|---|---|---|---------------|---------------|---------------------------------------------------------------------|
| 55335 |   |  | + | + | + | + | + | + |               |               | nucleotide binding protein Nbp35. putative                          |
| 55341 |   |  | + | + | + | + | + | + |               |               | Chitin synthase. homolog of N.CrassaChs2.Chitin synthase            |
| 55349 |   |  |   |   |   |   |   |   |               |               | RNAse P Rpr2/Rpp21/SNM1 subunit domain-containing protein. putative |
| 55351 |   |  |   | + |   |   |   |   |               |               | Alkyl hydroperoxide reductase/peroxiredoxin                         |
| 55353 |   |  | + | + | + | + | + | + | 1.233<br>down | 3.611<br>down | pathotenate kinase                                                  |
| 55358 |   |  |   |   |   |   |   |   |               |               | flavin-binding monooxygenase. putative                              |
| 55362 |   |  | + | + | + | + | + | + | 2.356<br>down | 2.012<br>down | Heat shock protein 70                                               |
| 55365 |   |  | + | + | + |   |   | + |               |               | DASH complex subunit Dad4                                           |
| 55374 |   |  |   |   |   |   |   |   | 1.298<br>down | 2.104 up      | unknown protein                                                     |
| 55375 |   |  | + |   | + |   |   |   |               |               | unknown protein                                                     |
| 55381 |   |  | + | + | + | + | + | + |               |               | unknown protein                                                     |
| 55384 |   |  | + | + | + |   |   |   |               |               | Endoribonuclease YSH1 (mRNA 3'-end-processing protein YSH1)         |
| 55401 |   |  | + | + | + | + | + | + |               |               | unknown protein                                                     |
| 55406 |   |  | + | + | + | + | + | + |               |               | unknown protein                                                     |
| 55407 |   |  |   |   |   |   |   |   | 2.000<br>down | 2.158<br>down | MFS permease                                                        |
| 55415 | + |  | + | + | + | + | + | + |               |               | ARF GEF2 Gea2                                                       |
| 55417 |   |  | + | + | + | + | + | + |               |               | dynein heavy chain                                                  |
| 55421 |   |  | + | + | + | + | + | + |               |               | unknown protein                                                     |
| 55422 |   |  | + | + | + |   |   |   |               |               | elongation factor 2 kinase. putative                                |
| 55443 |   |  | + | + | + |   |   |   | 2.239 up      | 2.233 up      | unknown protein                                                     |
| 55454 |   |  |   |   |   |   |   |   | 1.195<br>down | 3.038<br>down | unknown protein                                                     |
| 55467 |   |  | + | + | + | + | + | + |               |               | CDC45-like protein                                                  |
| 55478 |   |  |   |   |   |   |   |   |               |               | unknown protein. 2 TM                                               |
| 55508 |   |  | + | + | + | + | + | + |               |               | AFG1-like ATPase                                                    |
| 55511 |   |  | + | + | + | + | + | + |               |               | cation efflux family protein                                        |
| 55519 |   |  | + | + | + | + | + | + |               |               | unknown protein                                                     |

|       |   |   |   |   |   |   |            |            |                                                                                      |
|-------|---|---|---|---|---|---|------------|------------|--------------------------------------------------------------------------------------|
| 55534 | + | + | + | + | + | + |            |            | GlcNAc-1-P transferase                                                               |
| 55543 |   |   |   |   |   |   |            |            | serine/threonine protein kinase with similarity to casein kinase I                   |
| 55545 | + | + | + | + | + | + |            |            | Unknown protein with WD-40 repeats                                                   |
| 55548 | + | + | + | + | + | + |            |            | RNA polymerase II transcription mediator                                             |
| 55550 | + | + | + | + | + | + |            |            | aps2. of the adaptor protein complex AP-2 of clathrin-coated vesicles. small subunit |
| 55552 | + | + | + | + | + | + |            |            | Nascent polypeptide-associated complex subunit beta (NAC-beta)                       |
| 55559 |   |   |   |   |   |   |            |            | unknown protein                                                                      |
| 55561 |   |   |   |   |   |   |            |            | PTH11 GPCR                                                                           |
| 55566 |   | + |   |   |   |   | 1.272 up   | 2.085 up   | multicopper oxidase                                                                  |
| 55570 | + | + | + | + | + | + |            |            | Exocyst component Exo70                                                              |
| 55575 | + | + | + | + | + | + |            |            | unknown protein                                                                      |
| 55584 |   |   |   |   |   |   | 1.131 down | 2.033 down | unknown protein                                                                      |
| 55589 |   |   |   |   |   |   | 1.915 up   | 2.906 up   | 3' exoribonuclease involved in RNA processing during translation.                    |
| 55592 | + | + | + | + | + | + |            |            | Mob1/phocein family protein                                                          |
| 55595 | + | + | + | + | + | + | 1.311 up   | 2.042 up   | Ca <sup>2+</sup> transporter                                                         |
| 55597 | + | + | + | + | + | + | 1.384 down | 2.787 down | unknown protein                                                                      |
| 55599 | + | + |   |   |   |   | 1.710 down | 2.246 down | RNA 12 protein                                                                       |
| 55627 | + | + | + | + | + | + |            |            | CDP-alcohol phosphatidyltransferase                                                  |
| 55629 |   |   |   |   |   |   |            |            | unknown protein                                                                      |
| 55630 |   |   |   |   |   |   | 3.870 down | 7.837 down | monocarboxylate transporter                                                          |
| 55631 |   |   | + |   |   |   | 1.531 down | 2.294 down | phospholipase                                                                        |
| 55634 |   |   |   |   |   |   | 1.319 down | 2.506 down | MFS permease                                                                         |
| 55636 |   | + |   | + |   |   | 1.750 down | 2.511 down | MRP-type ABC transporter                                                             |
| 55644 | + | + | + | + | + | + |            |            | 20S proteasome alpha subunit Pup2                                                    |

|       |   |   |   |   |   |   |          |          |                                                                                                  |
|-------|---|---|---|---|---|---|----------|----------|--------------------------------------------------------------------------------------------------|
| 55660 | + | + | + | + | + | + |          |          | Transcription factor TFIIIS                                                                      |
| 55666 |   |   |   |   |   |   | 1.057 up | 4.246 up | unknown protein with WD repeats                                                                  |
| 55668 |   | + |   |   |   |   |          |          | unknown protein                                                                                  |
| 55669 | + | + | + | + | + | + |          |          | mRNA decapping hydrolase. putative                                                               |
| 55671 |   |   |   |   |   |   | 1.665 up | 2.237 up | unknown protein                                                                                  |
| 55679 | + | + | + | + | + | + |          |          | unknown protein                                                                                  |
| 55681 |   |   |   |   |   |   |          |          | unknown protein                                                                                  |
| 55698 |   |   |   |   |   |   |          |          | unknown protein                                                                                  |
| 55699 |   |   |   |   |   |   |          |          | unknown protein                                                                                  |
| 55706 | + | + | + | + | + | + |          |          | SCF ubiquitin ligase complex subunit. cullin                                                     |
| 55709 |   | + |   |   |   |   |          |          | unknown protein                                                                                  |
| 55719 |   |   |   |   |   |   | 2.340 up | 2.304 up | Protein kinase                                                                                   |
| 55723 |   |   |   |   |   |   |          |          | PotE                                                                                             |
| 55731 | + | + | + | + | + | + |          |          | cation channel family protein                                                                    |
| 55733 |   | + |   |   |   |   |          |          | GH92 $\alpha$ -1.2-mannosidase                                                                   |
| 55747 |   |   |   |   |   |   |          |          | ABC transporter                                                                                  |
| 55752 | + | + | + | + | + | + |          |          | ribosomal protein L29. Shows amino acid sequence similarity to <i>S. cerevisiae</i> mitochondria |
| 55759 |   |   |   |   |   |   |          |          | Zn2Cys6 transcriptional regulator                                                                |
| 55766 | + | + | + | + | + | + |          |          | nucleolar GTP-binding protein 1                                                                  |
| 55774 | + | + | + | + | + | + |          |          | Secretion related small GTPase                                                                   |
| 55782 |   |   |   |   |   |   | 1.283 up | 5.432 up | dipeptidyl peptidase 5                                                                           |
| 55788 | + | + | + | + | + | + |          |          | Ubiquitin-conjugating enzyme E2. putative                                                        |
| 55790 | + | + | + | + | + | + |          |          | N2.N2-dimethylguanosine tRNA methyltransferase.                                                  |
| 55796 | + | + | + | + | + | + |          |          | cyclin domain-containing protein                                                                 |
| 55802 | + | + |   |   |   |   | 1.351 up | 6.833 up | GH76 $\alpha$ -1.6-mannanase                                                                     |
| 55803 | + | + | + | + | + | + |          |          | protein kinase RIO1                                                                              |
| 55814 |   |   |   |   |   |   |          |          | unknown protein                                                                                  |
| 55818 | + | + | + | + | + | + |          |          | unknown protein                                                                                  |
| 55837 | + | + | + |   |   | + |          |          | Adenine phosphoribosyl transferases                                                              |
| 55838 | + | + | + |   |   |   |          |          | unknown protein                                                                                  |

|       |   |   |   |   |   |   |               |               |                                                                         |
|-------|---|---|---|---|---|---|---------------|---------------|-------------------------------------------------------------------------|
| 55855 |   |   |   |   |   |   |               |               | unknown protein                                                         |
| 55857 | + | + | + | + | + | + |               |               | Exocyst component Ex084                                                 |
| 55868 | + | + | + | + | + | + |               |               | PP2Ac. Protein phosphatase 2A homologues                                |
| 55871 |   |   |   |   |   |   | 3.474<br>down | 2.975<br>down | Short-chain dehydrogenase/reductase                                     |
| 55876 |   |   |   |   |   |   |               |               | unknown protein                                                         |
| 55881 |   |   |   |   |   |   |               |               | unknown protein                                                         |
| 55886 |   |   |   |   |   |   |               |               | GH16 glucan endo-1.3(4)-β-D-glucosidase                                 |
| 55887 |   |   |   |   |   |   | 4.792 up      | 38.374 up     | unknown protein. secreted                                               |
| 55891 |   |   |   |   |   |   |               |               | UBA/THIF-type NAD/FAD binding fold                                      |
| 55902 | + | + | + | + | + | + |               |               | Replication protein A2                                                  |
| 55912 | + | + | + | + | + | + |               |               | Cell division/GTP binding protein                                       |
| 55928 | + | + | + | + | + | + |               |               | bifunctional carbamoylphosphate synthase/aspartate carbamoyltransferase |
| 55939 | + | + | + |   |   |   |               |               | ran binding protein in the microtubule-organising centre. putative      |
| 55945 | + | + | + | + | + | + |               |               | Exocyst component Sec5                                                  |
| 55950 |   |   |   |   |   |   |               |               | unknown protein. 5 TM                                                   |
| 55969 | + | + | + | + | + | + |               |               | Translation initiation factor. eIF1A.                                   |
| 55981 | + | + | + | + | + | + |               |               | tRNA cytosine-5-methylases                                              |
| 55990 |   |   |   |   |   |   |               |               | unknown protein                                                         |
| 55993 | + | + | + | + | + | + |               |               | unknown protein                                                         |
| 55999 |   |   |   |   |   |   | 2.100<br>down | 2.335 up      | GH27 α-galactosidase                                                    |
| 56002 |   |   |   |   |   |   |               |               | unknown protein                                                         |
| 56003 |   | + |   |   |   |   |               |               | RNA binding protein MSSP-2                                              |
| 56026 | + | + | + | + | + | + | 1.396<br>down | 2.779<br>down | unknown protein                                                         |
| 56033 |   |   |   |   |   |   |               |               | unknown protein                                                         |
| 56048 |   |   |   |   |   |   |               |               | unknown protein                                                         |
| 56064 |   |   |   |   |   |   | 1.179<br>down | 2.519<br>down | unknown protein                                                         |
| 56070 | + | + | + | + | + | + |               |               | unknown protein                                                         |



|       |   |   |   |   |   |   |            |            |                                                                                            |
|-------|---|---|---|---|---|---|------------|------------|--------------------------------------------------------------------------------------------|
| 56074 | + | + | + | + | + | + |            |            | EH domain-containing protein.End3. involved inEndocytosis. actin cytoskeletal organization |
| 56077 | + | + | + |   |   |   |            |            | Zn2Cys6 transcriptional regulator                                                          |
| 56081 |   |   |   |   |   |   |            |            | unknown protein                                                                            |
| 56089 | + | + | + | + | + | + |            |            | unknown protein                                                                            |
| 56093 |   |   |   |   |   |   | 1.247 up   | 3.202 up   | unknown protein                                                                            |
| 56095 |   |   |   |   |   |   |            |            | MFS permease                                                                               |
| 56115 | + | + | + | + | + | + |            |            | Spc97 / Spc98 family proteins involved in spindle pole body                                |
| 56117 |   | + |   |   |   |   | 1.054 up   | 2.548 down | unknown protein                                                                            |
| 56118 | + | + | + | + | + | + |            |            | unknown protein                                                                            |
| 56129 |   |   |   |   |   |   |            |            | hexokinase                                                                                 |
| 56140 | + | + | + | + | + | + |            |            | unknown protein                                                                            |
| 56141 | + |   | + |   |   | + | 1.738 down | 3.095 down | unknown protein                                                                            |
| 56146 | + | + | + | + | + | + |            |            | unknown protein                                                                            |
| 56149 | + | + | + | + | + | + |            |            | Protein with homology to anucleate Primary sterigmata Protein apsA (Aspergillus nidulans)  |
| 56150 |   |   |   |   |   |   |            |            | unknown protein                                                                            |
| 56169 |   | + |   |   |   |   |            |            | vacuolar protein sorting protein (Vps36). putative                                         |
| 56176 |   |   |   |   |   |   |            |            | MRP-type ABC transporter                                                                   |
| 56196 | + | + | + | + | + | + |            |            | unknown protein                                                                            |
| 56203 |   |   |   |   |   |   |            |            | dolichyl-phosphate-mannose a-mannosyltransferases                                          |
| 56206 | + | + | + | + | + | + |            |            | unknown protein                                                                            |
| 56211 |   |   |   |   |   |   | 5.270 up   | 4.898 up   | unknown protein                                                                            |
| 56214 |   |   |   |   |   |   |            |            | Zn2Cys6 transcriptional regulator                                                          |
| 56215 |   | + |   |   |   |   |            |            | 26S proteasome non-ATPase regulatory subunit 9. putative                                   |
| 56218 |   |   |   |   |   |   | 1.453 up   | 2.688 down | unknown protein                                                                            |
| 56236 |   |   |   |   |   |   | 1.201 down | 2.746 up   | SAM-dependent methyltransferases                                                           |
| 56256 | + | + | + | + | + | + | 1.034 down | 2.133 down | unknown protein                                                                            |

|       |   |   |   |   |   |   |            |            |                                                             |
|-------|---|---|---|---|---|---|------------|------------|-------------------------------------------------------------|
| 56259 |   |   |   |   |   |   | 1.422 up   | 3.484 up   | unknown protein                                             |
| 56261 | + | + | + | + | + | + |            |            | unknown protein                                             |
| 56267 | + | + | + |   |   |   |            |            | pyridoxal kinase                                            |
| 56272 |   |   |   |   |   |   |            |            | Cytochrome P450 monooxygenase                               |
| 56278 |   |   |   |   |   |   | 1.217 up   | 3.688 up   | unknown protein. in Sordariomycetes                         |
| 56289 |   |   |   |   |   |   | 1.404 up   | 2.177 down | MFS permease                                                |
| 56291 |   |   |   |   |   |   |            |            | SAM dependent methyltransferase                             |
| 56314 |   |   |   |   |   |   |            |            | Amino acid transporter PotE                                 |
| 56318 | + | + | + | + | + | + |            |            | Cargo transport protein Emp24 (p24 protein family)          |
| 56326 |   |   |   |   |   |   | 1.370 up   | 2.884 up   | Zinc-containing alcohol dehydrogenase                       |
| 56328 |   |   |   |   |   |   |            |            | GT31 b-glycosyltransferases                                 |
| 56341 | + |   | + |   |   |   |            |            | unknown protein                                             |
| 56344 | + | + | + | + | + | + |            |            | unknown protein                                             |
| 56345 | + | + | + | + | + | + |            |            | ribosomal RNA methyltransferase RrmJ/FtsJ domain.           |
| 56350 |   |   |   |   |   |   | 1.175 down | 2.450 up   | cysteine synthase. putative                                 |
| 56354 |   |   |   |   |   |   |            |            | histone-lysine N methyltransferase                          |
| 56363 | + | + |   |   |   | + |            |            | unknown protein                                             |
| 56370 |   |   |   |   |   |   |            |            | Isocitrate/isopropylmalate dehydrogenase                    |
| 56376 | + | + | + | + | + | + | 1.888 up   | 2.202 up   | unknown protein                                             |
| 56384 | + | + | + | + | + | + |            |            | Nucleolar protein that binds nuclear localization sequences |
| 56396 |   |   |   |   |   |   |            |            | unknown protein                                             |
| 56399 |   |   |   |   |   |   | 1.669 down | 2.925 down | unknown protein                                             |
| 56408 | + | + | + | + | + | + | 1.081 up   | 2.056 down | unknown protein                                             |
| 56409 | + | + | + | + | + | + |            |            | unknown protein                                             |
| 56418 |   |   |   |   |   |   |            |            | GH55 $\beta$ -1 3-glucanase                                 |
| 56421 | + | + | + | + | + | + |            |            | mitochondrial carrier protein                               |

|       |   |   |   |   |   |   |               |               |                                                                       |
|-------|---|---|---|---|---|---|---------------|---------------|-----------------------------------------------------------------------|
| 56426 | + | + | + | + | + | + | 1.116<br>down | 2.044<br>down | GCPR. mPR-type                                                        |
| 56427 | + | + | + |   |   |   | 3.269<br>down | 2.089<br>down | Arylacetamide deacetylase                                             |
| 56431 |   |   |   |   |   |   |               |               | unknown protein                                                       |
| 56432 | + | + | + | + | + | + |               |               | FMN-dependent dehydrogenase                                           |
| 56434 | + | + | + | + | + | + | 1.327<br>down | 3.728 up      | FKBP-type peptidyl-prolyl isomerase. putative                         |
| 56440 |   |   |   |   |   |   |               |               | Ion transport protein                                                 |
| 56448 |   |   |   |   |   |   | 2.402<br>down | 2.663 up      | GH18 chitinase CHI18-11                                               |
| 56467 | + | + | + | + | + | + | 1.678 up      | 2.430 up      | Mitochondrial deoxynucleotide carrier protein                         |
| 56469 | + | + | + | + | + | + | 1.172 up      | 2.548<br>down | unknown protein                                                       |
| 56470 |   |   |   |   |   |   |               |               | LdhA Lactate dehydrogenase and related dehydrogenases                 |
| 56499 |   |   |   |   |   |   | 1.754 up      | 2.959 up      | N-acyl-phosphatidylethanolamine-hydrolyzing phospholipase D. putative |
| 56512 | + | + | + | + | + | + |               |               | unknown protein                                                       |
| 56515 |   |   |   |   |   |   | 1.767<br>down | 9.316<br>down | Regulation of HR towards crossover                                    |
| 56525 |   |   |   |   |   |   |               |               | UbiD family decarboxylase                                             |
| 56531 | + | + | + | + | + | + |               |               | unknown protein                                                       |
| 56546 |   |   |   |   |   |   | 4.290 up      | 5.674 up      | unknown protein. 3TM                                                  |
| 56547 |   | + |   |   |   |   |               |               | unknown protein                                                       |
| 56559 | + | + | + | + | + | + |               |               | unknown protein                                                       |
| 56565 | + | + | + | + | + | + |               |               | unknown protein                                                       |
| 56568 | + | + | + | + | + | + |               |               | unknown protein                                                       |
| 56572 |   | + |   |   |   |   | 1.383<br>down | 4.784<br>down | aminotransferase. classes I and II family                             |
| 56582 | + | + | + | + | + | + |               |               | unknown protein                                                       |
| 56587 |   |   |   |   |   |   | 1.259<br>down | 5.312<br>down | GCN5-related N-acetyltransferase                                      |
| 56593 |   |   |   |   |   |   |               |               | unknown protein                                                       |

|       |   |   |   |   |   |   |   |   |   |            |            |                                                                                              |
|-------|---|---|---|---|---|---|---|---|---|------------|------------|----------------------------------------------------------------------------------------------|
| 56603 | + | + | + | + | + | + | + | + | + |            |            | unknown protein                                                                              |
| 56605 |   |   |   | + | + | + | + | + | + |            |            | β-arrestin, probable adaptor and transducer involved in signalling, related to the E. nidula |
| 56610 |   |   |   |   |   |   |   |   |   |            |            | unknown protein                                                                              |
| 56614 |   |   |   | + | + | + |   |   |   |            |            | unknown protein                                                                              |
| 56625 |   |   |   |   |   |   |   |   |   | 1.101 up   | 2.505 down | CoA-transferase family III                                                                   |
| 56631 |   |   |   | + | + | + | + | + | + |            |            | ribulose-phosphate 3-epimerase                                                               |
| 56638 |   |   |   | + | + | + | + | + | + |            |            | animal α-N-acetylhexosaminyltransferases                                                     |
| 56646 |   |   |   |   |   |   |   |   |   | 1.307 down | 2.940 down | monoamine oxidase                                                                            |
| 56671 |   |   |   | + | + | + | + | + | + | 1.885 up   | 2.349 up   | unknown protein                                                                              |
| 56682 |   |   |   |   |   |   |   |   |   |            |            | unknown protein                                                                              |
| 56684 |   |   |   |   |   |   |   |   |   |            |            | MFS permease                                                                                 |
| 56687 |   |   |   |   |   |   |   |   |   |            |            | cytochrome P450 protein                                                                      |
| 56690 |   |   |   |   |   |   |   |   |   |            |            | mannose-1-phosphate guanylyltransferase, putative                                            |
| 56700 |   |   |   |   |   |   |   |   |   |            |            | unknown protein                                                                              |
| 56717 |   |   |   |   |   |   |   |   |   |            |            | unknown protein                                                                              |
| 56720 |   |   |   | + | + | + | + | + | + |            |            | unknown protein                                                                              |
| 56726 |   |   |   | + | + | + | + | + | + | 1.287 up   | 2.717 up   | Branched chain α-keto acid dehydrogenase complex, α subunit                                  |
| 56744 |   |   |   | + | + | + | + | + | + |            |            | Calcium transporter                                                                          |
| 56758 |   |   |   |   |   | + | + | + | + | 1.330 up   | 2.799 up   | unknown protein                                                                              |
| 56771 |   |   |   |   |   |   |   |   |   |            |            | SSCRP                                                                                        |
| 56772 |   |   |   | + | + | + |   |   | + |            |            | transcriptional regulator, unknown                                                           |
| 56780 |   |   |   |   |   |   |   |   |   |            |            | DNA polymerase X family                                                                      |
| 56789 |   |   |   | + | + | + | + | + | + |            |            | cell division control protein Cdc6                                                           |
| 56792 |   |   |   | + | + | + | + | + | + |            |            | SSCRP                                                                                        |
| 56804 |   |   |   |   |   |   |   |   |   |            |            | unknown protein                                                                              |
| 56812 |   |   |   | + | + | + | + | + | + |            |            | GT α-1.2 glucosyltransferase                                                                 |
| 56819 |   |   |   |   |   |   |   |   |   | 2.546 down | 3.415 down | glutathione-S-transferase                                                                    |

|       |   |   |   |   |   |   |               |               |                                                            |
|-------|---|---|---|---|---|---|---------------|---------------|------------------------------------------------------------|
| 56830 |   |   |   |   |   |   | 1.988<br>down | 2.437<br>down | dipeptidyl peptidase 5                                     |
| 56831 | + | + | + | + | + | + | 1.247 up      | 2.100 up      | Co-chaperone Hsc20                                         |
| 56835 |   |   |   |   |   |   |               |               | unknown protein                                            |
| 56838 |   |   |   |   |   |   |               |               | short chain dehydrogenase/reductase                        |
| 56839 | + | + | + |   |   |   |               |               | Zinc-containing alcohol dehydrogenase                      |
| 56840 |   |   |   |   |   |   | 6.499<br>down | 6.709 up      | unknown protein                                            |
| 56845 |   |   |   |   |   |   |               |               | flavoprotein monooxygenase                                 |
| 56853 |   |   |   |   |   |   | 2.107<br>down | 3.913<br>down | unknown protein                                            |
| 56856 | + | + | + | + | + | + |               |               | DNA replication complex GINS protein (Psf2). putative      |
| 56860 | + | + | + | + | + | + | 1.964<br>down | 3.588<br>down | unknown protein                                            |
| 56863 | + | + | + | + | + | + | 6.161<br>down | 3.218<br>down | unknown protein                                            |
| 56864 | + | + | + | + | + | + |               |               | unknown protein                                            |
| 56872 | + | + | + | + | + | + |               |               | PP2Ac. Protein phosphatase 2A homologues. catalytic domain |
| 56876 | + | + | + | + | + | + |               |               | polysaccharide export protein CAP59                        |
| 56894 |   |   |   |   |   |   | 1.156 up      | 2.606 up      | GH18 chitinase CHI18-10                                    |
| 56896 |   |   |   |   |   |   |               |               | unknown protein                                            |
| 56897 |   |   |   |   |   |   |               |               | unknown protein                                            |
| 56911 |   |   |   |   |   |   |               |               | Urea transporter                                           |
| 56920 | + | + | + | + | + | + |               |               | Leucine aminopeptidase 1                                   |
| 56934 | + | + | + | + | + | + |               |               | gluconokinase. thermoresistant glucokinase family          |
| 56942 | + | + | + | + | + | + |               |               | unknown protein                                            |
| 56952 | + | + | + |   |   |   |               |               | MFS permease                                               |
| 56966 |   |   |   |   |   |   |               |               | Cytochrome P450. putative                                  |
| 56996 |   |   |   |   |   |   | 1.054<br>down | 15.988 up     | GH5 $\beta$ -Mannanase MAN1                                |

|       |   |   |   |   |   |   |               |               |                                                                                        |
|-------|---|---|---|---|---|---|---------------|---------------|----------------------------------------------------------------------------------------|
| 57002 | + | + | + | + | + | + | 1.266<br>down | 2.875<br>down | unknown protein                                                                        |
| 57008 |   |   |   |   |   |   | 1.238 up      | 3.284 up      | unknown protein                                                                        |
| 57010 |   |   |   |   |   |   |               |               | prenyltransferase and squalene oxidase                                                 |
| 57015 |   |   |   |   |   |   |               |               | Amino acid transporters                                                                |
| 57016 | + | + | + | + | + | + |               |               | germinal center kinase. related to <i>S. cerevisiae</i> Kic1p                          |
| 57034 |   |   |   |   |   |   |               |               | unknown protein                                                                        |
| 57045 |   |   |   |   |   |   | 1.818<br>down | 2.101<br>down | unknown protein                                                                        |
| 57049 | + | + | + | + | + | + | 1.578<br>down | 2.408<br>down | tRNA selenocysteine-associated protein 1                                               |
| 57059 | + | + | + | + | + | + |               |               | homeobox transcriptional regulator                                                     |
| 57071 | + | + | + | + | + | + |               |               | unknown protein                                                                        |
| 57078 |   |   |   |   |   |   |               |               | unknown protein                                                                        |
| 57088 |   |   |   |   |   |   |               |               | Sulfate/bicarbonate/oxalate exchanger SAT-1 and related transporters (SLC26 family)    |
| 57091 | + | + | + | + | + | + |               |               | GDP-mannose transporter                                                                |
| 57098 |   |   |   |   |   |   |               |               | unknown protein                                                                        |
| 57100 | + | + | + | + | + | + |               |               | unknown protein                                                                        |
| 57101 |   |   |   |   |   |   | 1.475 up      | 3.705 up      | PTH11 GPCR                                                                             |
| 57112 |   |   |   |   |   |   | 1.156<br>down | 2.420<br>down | HET and Ankyrin domain protein                                                         |
| 57128 | + | + | + | + | + | + | 1.584<br>down | 2.356<br>down | GH13 glycogen debranching enzyme                                                       |
| 57129 | + | + | + | + | + | + |               |               | Protein transport protein Yos1                                                         |
| 57140 | + | + | + | + | + | + |               |               | unknown protein                                                                        |
| 57141 | + | + | + | + | + | + |               |               | FAD binding domain-containing protein                                                  |
| 57167 | + | + | + | + | + | + |               |               | SHR3. an ER membrane protein involved in packing of amino acid permeases into ER-Golgi |
| 57169 | + | + | + | + | + | + |               |               | unknown protein                                                                        |
| 57178 | + | + | + | + | + | + |               |               | nuclear mRNA splicing factor-associated protein. putative                              |
| 57179 |   |   |   |   |   |   | 1.125 up      | 8.449 up      | GH105/GH88 glycosyl hydrolase                                                          |
| 57185 |   |   |   |   |   |   | 3.912 up      | 2.408 up      | Amino acid transporters                                                                |

|       |   |   |   |   |   |   |               |               |                                                                                            |
|-------|---|---|---|---|---|---|---------------|---------------|--------------------------------------------------------------------------------------------|
| 57198 | + | + | + | + | + | + | 1.567<br>down | 3.568<br>down | Rad10                                                                                      |
| 57204 |   |   |   |   |   |   |               |               | lipase. secreted                                                                           |
| 57208 | + | + | + | + | + | + |               |               | ubiquitin-like modifier SUMO. putative                                                     |
| 57217 | + | + | + | + | + | + |               |               | unknown protein                                                                            |
| 57220 | + | + | + |   |   |   |               |               | histone deacetylase                                                                        |
| 57234 |   |   | + |   |   |   |               |               | unknown protein                                                                            |
| 57237 |   |   |   |   |   |   |               |               | unknown protein                                                                            |
| 57252 | + | + | + | + | + | + |               |               | polyadenylation factor subunit CstF64                                                      |
| 57253 | + | + | + | + | + | + |               |               | unknown protein                                                                            |
| 57263 | + | + | + | + | + | + |               |               | protoporphyrinogen oxidase. putative                                                       |
| 57274 | + | + | + | + | + | + |               |               | unknown protein                                                                            |
| 57277 |   |   |   |   |   |   |               |               | unknown protein                                                                            |
| 57280 |   |   | + |   |   |   |               |               | unknown protein                                                                            |
| 57282 | + | + | + | + | + | + |               |               | MYG1. putative                                                                             |
| 57286 | + | + | + | + | + | + | 2.161 up      | 2.381 up      | unknown protein                                                                            |
| 57287 | + | + | + | + | + | + |               |               | chitin synthase activator. putative                                                        |
| 57291 |   |   |   |   |   |   |               |               | unknown protein                                                                            |
| 57295 | + | + | + | + | + | + |               |               | Transcription elongation factor spt-6                                                      |
| 57302 |   | + |   |   |   |   |               |               | dihydrofolate reductase                                                                    |
| 57322 | + | + | + | + |   | + | 1.005<br>down | 2.955<br>down | ARO Transcriptional regulators containing a DNA-binding HTH domain and an aminotransferase |
| 57334 | + | + | + | + | + | + |               |               | HECT-domain-containing protein                                                             |
| 57335 | + | + | + | + | + | + |               |               | unknown protein                                                                            |
| 57357 | + | + | + | + | + | + | 1.124 up      | 2.654 up      | Glycine cleavage T protein (aminomethyl transferase). putative                             |
| 57370 | + | + | + | + | + | + |               |               | AMP-dependent synthetase and ligase                                                        |
| 57383 |   |   |   |   |   |   | 1.846<br>down | 2.443<br>down | unknown protein                                                                            |
| 57391 | + | + | + | + | + | + |               |               | unknown protein                                                                            |
| 57397 |   | + | + |   |   |   | 2.316 up      | 2.850 up      | unknown protein                                                                            |

|       |   |   |   |   |   |   |               |               |                                                                            |
|-------|---|---|---|---|---|---|---------------|---------------|----------------------------------------------------------------------------|
| 57399 | + | + | + | + | + | + |               |               | cAMP dependent protein kinase. protein kinase A. catalytic subunit         |
| 57402 | + | + | + | + | + | + |               |               | SSCRP                                                                      |
| 57421 | + | + | + | + | + | + |               |               | G2/mitotic-specific cyclin-B [Neurospora crassa OR74A]                     |
| 57424 | + | + | + | + | + | + |               |               | QIP. Putative exonuclease protein. involved in quelling                    |
| 57430 |   |   |   |   |   |   |               |               | Glutamate-cysteine ligase                                                  |
| 57433 |   |   |   |   |   |   | 1.035<br>down | 2.620 up      | Peptidase S8 and S53. subtilisin. kexin. sedolisin                         |
| 57435 | + | + | + | + | + | + |               |               | unknown protein                                                            |
| 57465 | + | + | + | + | + | + | 1.074<br>down | 2.235<br>down | Vsp9 domain protein                                                        |
| 57472 | + | + | + | + |   |   |               |               | unknown protein                                                            |
| 57474 | + | + | + | + | + | + |               |               | unknown protein                                                            |
| 57476 | + | + | + | + | + | + |               |               | unknown protein                                                            |
| 57488 |   |   |   |   |   |   | 1.149<br>down | 2.350<br>down | Top3 gene                                                                  |
| 57494 | + | + | + | + | + | + |               |               | UTP10. encoding a component of the SSU processome containing the U3 snoRNA |
| 57508 | + | + | + | + | + | + |               |               | Dynamin-related GTPase                                                     |
| 57513 | + | + | + | + | + | + |               |               | MAPKK. mitogen activated protein kinase kinase Ssk2p                       |
| 57524 |   |   |   |   |   |   | 1.336<br>down | 2.065<br>down | amidohydrolase 2                                                           |
| 57526 |   |   |   |   |   |   | 8.271<br>down | 5.647<br>down | GPCR. mating type pheromone G-protein coupled receptor                     |
| 57527 | + | + | + |   |   |   | 1.029<br>down | 3.217<br>down | unknown protein                                                            |
| 57528 |   |   |   |   |   |   |               |               | unknown protein                                                            |
| 57534 | + | + | + | + | + | + |               |               | Zn2Cys6 transcriptional regulator                                          |
| 57535 |   | + |   |   |   |   |               |               | acylphosphatase. putative                                                  |
| 57537 |   |   |   |   |   |   | 1.299 up      | 2.213 up      | unknown protein                                                            |
| 57555 |   |   |   |   |   |   | 2.737<br>down | 3.347<br>down | cytochrome P450 monooxygenase                                              |
| 57558 |   |   |   |   |   |   |               |               | unknown protein                                                            |



|       |   |   |   |   |   |   |               |                |                                                                                                 |
|-------|---|---|---|---|---|---|---------------|----------------|-------------------------------------------------------------------------------------------------|
| 57568 |   | + | + |   |   |   | 1.042<br>down | 2.344<br>down  | unknown protein                                                                                 |
| 57574 | + | + | + | + | + | + |               |                | unknown protein                                                                                 |
| 57575 |   |   |   |   |   |   | 1.168 up      | 2.904 up       | unknown protein                                                                                 |
| 57580 | + | + | + | + | + | + |               |                | unknown protein                                                                                 |
| 57581 | + | + | + | + | + | + |               |                | unknown protein                                                                                 |
| 57592 |   | + |   |   |   |   | 1.009<br>down | 2.373<br>down  | unknown protein                                                                                 |
| 57595 | + | + | + | + | + | + |               |                | ribosomal protein L7/12 domain. Shares amino acid sequence similarity to <i>S. cerevisiae</i> m |
| 57600 | + | + | + | + | + | + |               |                | FACT complex protein (Facilitates chromatin transcription complex subunit SPT16)                |
| 57603 | + | + | + | + | + | + | 1.449<br>down | 2.098<br>down  | unknown protein                                                                                 |
| 57608 | + | + | + | + | + | + |               |                | SNF2 family helicase/ATPase. putative                                                           |
| 57609 | + | + | + | + | + | + |               |                | unknown protein                                                                                 |
| 57613 | + | + | + | + | + | + |               |                | exonuclease family protein                                                                      |
| 57631 | + | + | + | + | + | + |               |                | unknown protein                                                                                 |
| 57632 | + | + | + | + | + | + |               |                | unknown protein. WD repeats                                                                     |
| 57643 | + | + |   |   |   |   | 1.743<br>down | 18.548<br>down | unknown protein                                                                                 |
| 57647 |   |   |   |   |   |   |               |                | 3-beta hydroxysteroid dehydrogenase/isomerase. putative                                         |
| 57666 | + | + | + | + | + | + |               |                | unknown protein                                                                                 |
| 57671 |   | + |   |   |   |   |               |                | unknown protein                                                                                 |
| 57676 | + | + | + | + | + | + |               |                | Translation initiation factor 3. subunit i (elf-3i)                                             |
| 57696 | + | + | + | + | + | + |               |                | unknown protein                                                                                 |
| 57720 | + | + | + | + | + | + |               |                | Swr1p complex component (Swc5). putative                                                        |
| 57727 | + | + | + | + | + | + |               |                | unknown protein                                                                                 |
| 57728 | + | + | + | + | + | + |               |                | NimA interactive protein. putative                                                              |
| 57730 | + | + | + | + | + | + |               |                | unknown protein                                                                                 |
| 57735 | + | + | + | + | + | + | 1.398<br>down | 2.025<br>down  | GATA type transcriptional regulator                                                             |
| 57737 |   | + | + |   |   |   |               |                | unknown protein                                                                                 |

|       |   |   |   |   |   |   |               |                |                                                                    |
|-------|---|---|---|---|---|---|---------------|----------------|--------------------------------------------------------------------|
| 57749 |   |   |   |   |   |   | 2.035<br>down | 3.764<br>down  | MFS permease                                                       |
| 57750 | + | + | + | + | + | + |               |                | unknown protein with WD repeats                                    |
| 57756 |   |   | + |   |   |   |               |                | unknown protein                                                    |
| 57760 | + | + | + | + | + | + | 1.349<br>down | 2.915<br>down  | Zn2Cys6 transcriptional regulator                                  |
| 57776 |   |   |   |   |   |   |               |                | unknown protein                                                    |
| 57784 | + | + | + | + | + | + |               |                | Golgi apparatus membrane protein tvp-23                            |
| 57823 |   |   |   |   |   |   |               |                | unknown protein                                                    |
| 57832 |   | + |   |   |   |   |               |                | vacuolar ATPase assembly integral membrane protein VMA21. putative |
| 57840 | + | + |   |   |   |   |               |                | bZIP transcription factor                                          |
| 57855 | + | + | + | + | + | + |               |                | unknown protein                                                    |
| 57857 |   |   |   |   |   |   |               |                | GH2 $\beta$ -mannosidase                                           |
| 57860 |   |   |   |   |   |   | 1.153<br>down | 3.578<br>down  | Multicopper oxidases                                               |
| 57864 |   |   |   |   |   |   |               |                | unknown protein                                                    |
| 57865 | + | + | + | + | + | + | 1.281 up      | 2.816 up       | unknown protein                                                    |
| 57868 |   |   |   |   |   |   | 2.442 up      | 2.062 up       | Delta 1-pyrroline-5-carboxylate reductase                          |
| 57869 | + | + | + | + | + | + |               |                | unknown protein                                                    |
| 57870 | + | + | + | + | + | + | 2.398 up      | 3.119 up       | histone H3                                                         |
| 57886 | + | + | + | + | + | + |               |                | unknown protein                                                    |
| 57891 | + | + | + | + | + | + | 1.078<br>down | 2.186<br>down  | actinin actin binding and calcium-binding EF-hand domains          |
| 57904 | + | + | + | + | + | + |               |                | checkpoint serine/threonine-protein kinase BUB1. putative          |
| 57905 | + | + | + | + | + | + |               |                | unknown protein                                                    |
| 57914 |   |   |   |   |   |   | 1.158 up      | 18.424<br>down | Esterase/lipase/thioesterase                                       |
| 57923 | + | + | + | + | + | + |               |                | unknown protein                                                    |
| 57935 | + | + | + | + | + | + |               |                | snf2 chromatin remodeling protein                                  |
| 57936 | + | + | + | + | + | + |               |                | unknown protein                                                    |
| 57940 | + |   | + | + |   | + |               |                | alternative oxidase aox1                                           |

|       |   |   |   |   |   |   |            |            |                                                                                         |
|-------|---|---|---|---|---|---|------------|------------|-----------------------------------------------------------------------------------------|
| 57947 | + | + | + | + | + | + |            |            | BioF -keto--aminopelargonate synthetase and related enzymes                             |
| 57957 | + | + | + | + | + | + |            |            | transcriptional regulator. unknown                                                      |
| 57965 |   |   |   |   |   |   | 1.179 up   | 2.203 down | DSBA family oxidoreductase. putative                                                    |
| 57975 | + | + | + | + | + | + | 1.804 up   | 3.326 up   | phospholipase C. related to Aspergillus fumigatus phosphatidylinositol phospholipase C  |
| 57997 | + | + | + | + | + | + |            |            | acting-binding cofilin/tropomyosin domain                                               |
| 58011 |   | + | + |   |   |   |            |            | C2H2 conidiation transcription factor FlbC                                              |
| 58016 |   |   |   |   |   |   | 1.417 up   | 3.118 up   | unknown protein                                                                         |
| 58026 |   |   |   |   |   |   | 1.086 down | 2.694 down | glutathione S-transferase domain-containing protein                                     |
| 58036 | + | + | + | + | + | + |            |            | prefoldin subunit 1. putative                                                           |
| 58051 |   |   |   |   |   |   | 1.387 down | 2.606 down | unknown protein                                                                         |
| 58055 | + | + | + | + | + | + |            |            | UbiA prenyltransferase containing 9 transmembrane domains; related to S. cerevisiae Par |
| 58058 |   |   |   |   |   |   |            |            | unknown protein                                                                         |
| 58063 | + | + | + | + | + | + |            |            | unknown protein                                                                         |
| 58065 |   | + |   |   |   |   |            |            | unknown protein                                                                         |
| 58066 |   |   |   |   |   |   |            |            | short chain dehydrogenase/reductase                                                     |
| 58068 | + | + | + |   |   | + |            |            | haloacid dehalogenase-like hydrolase                                                    |
| 58073 | + | + | + | + | + | + |            |            | uroporphyrinogen decarboxylase                                                          |
| 58076 | + | + | + | + | + | + |            |            | apurinic/aprimidinic endonuclease-like protein                                          |
| 58077 | + | + | + | + | + | + |            |            | unknown protein                                                                         |
| 58114 | + | + | + | + | + | + |            |            | unknown protein                                                                         |
| 58115 |   |   |   |   |   |   |            |            | unknown protein                                                                         |
| 58117 |   |   |   |   |   |   |            |            | GH89 $\alpha$ -N-acetylglucosaminidase                                                  |
| 58119 |   |   |   |   |   |   |            |            | unknown protein                                                                         |
| 58125 | + | + | + | + | + | + |            |            | 20S proteasome beta-type subunit Pup3                                                   |
| 58130 | + | + | + | + | + | + | 1.563 down | 2.246 down | bHLH transcriptional regulator                                                          |
| 58150 | + | + | + | + | + | + |            |            | Peptidase C19. ubiquitin carboxyl-terminal hydrolase 2                                  |
| 58158 |   |   |   |   |   |   |            |            | OPT family small oligopeptide transporter                                               |

|       |   |   |   |   |   |   |               |               |                                                                                          |
|-------|---|---|---|---|---|---|---------------|---------------|------------------------------------------------------------------------------------------|
| 58161 | + | + | + | + | + | + |               |               | GTPase-activating protein (GAP) for Rab family members.Gyp5. involved in ER toGolgi traf |
| 58162 |   |   |   |   |   |   |               |               | alkaline phytoceramidase                                                                 |
| 58170 | + | + | + | + | + | + |               |               | ethanolamine kinase. putative                                                            |
| 58183 | + | + | + | + | + | + |               |               | MIF4G domain-containing protein (Initiation factor eIF-4 gamma. middle)                  |
| 58184 | + | + | + | + | + | + |               |               | DNA polymerase epsilon. subunit B                                                        |
| 58188 | + | + | + | + | + | + |               |               | Chitin synthase                                                                          |
| 58191 | + | + | + | + | + | + |               |               | unknown protein                                                                          |
| 58201 | + | + | + | + | + | + |               |               | mitochondrial NADH-ubiquinone oxidoreductase 20 kD subunit                               |
| 58205 | + | + | + | + | + | + |               |               | tyrosine protein kinase                                                                  |
| 58213 |   |   |   |   |   |   |               |               | Ku80p (Hdf2p)                                                                            |
| 58220 | + | + | + |   |   |   |               |               | MFS permease                                                                             |
| 58225 |   |   |   |   |   |   |               |               | unknown protein                                                                          |
| 58227 |   |   |   |   |   |   | 2.248 up      | 4.000 up      | GCN5-related acetyltransferase                                                           |
| 58229 | + | + | + | + | + | + | 2.134 up      | 2.030 up      | Ubiquitin-like protein (HubA)                                                            |
| 58239 |   |   |   |   |   |   |               |               | GH16 cell wall glucanosyltransferase                                                     |
| 58244 |   |   |   |   |   |   | 1.892<br>down | 4.551<br>down | unknown protein                                                                          |
| 58264 |   |   |   |   |   |   | 1.747 up      | 2.575 up      | paxU orthologue ? (indole-terpene biosynthesis?)                                         |
| 58267 | + | + | + | + | + | + | 1.428 up      | 3.018 up      | tRNA-dihydrouridine synthase.                                                            |
| 58282 | + | + | + |   |   |   |               |               | esterase family 9                                                                        |
| 58285 |   |   |   |   |   |   | 1.981<br>down | 2.096<br>down | PKS-NRPS                                                                                 |
| 58289 |   |   |   |   |   |   |               |               | Zinc-binding oxidoreductase                                                              |
| 58296 |   |   |   |   |   |   | 1.107 up      | 2.676 up      | MFS permease                                                                             |
| 58299 | + | + | + | + | + | + |               |               | RRB1 gene encoding an essential nuclear protein involved in early steps ofRibosome bioge |
| 58321 | + | + | + | + | + | + |               |               | ubiquitin-conjugating enzyme                                                             |
| 58333 |   |   |   |   |   |   | 1.519<br>down | 2.281<br>down | FAD binding protein                                                                      |
| 58356 |   |   |   |   |   |   |               |               | glycerol kinase                                                                          |
| 58361 | + | + | + |   |   |   |               |               | dual specificity phosphatase                                                             |

|       |   |   |   |   |   |   |               |               |                                              |
|-------|---|---|---|---|---|---|---------------|---------------|----------------------------------------------|
| 58363 |   |   |   |   |   |   |               |               | unknown protein                              |
| 58366 |   |   |   |   |   |   | 1.280<br>down | 2.944 up      | AAA+-type ATPase                             |
| 58370 |   | + |   |   |   |   | 1.865<br>down | 2.339<br>down | mtDNA repair protein                         |
| 58381 | + | + | + | + | + | + |               |               | unknown protein                              |
| 58387 |   | + | + |   |   |   | 1.261<br>down | 2.312<br>down | proline iminopeptidase                       |
| 58389 | + | + | + |   |   |   |               |               | Zn2Cys6 transcriptional regulator            |
| 58391 |   |   |   |   |   |   |               |               | unknown protein                              |
| 58396 |   |   |   |   |   |   |               |               | unknown protein                              |
| 58404 | + | + | + | + | + | + |               |               | unknown protein                              |
| 58405 | + | + | + | + | + | + |               |               | splicing factor U2AF 23 kDa subunit          |
| 58412 |   |   |   |   |   |   | 3.697<br>down | 3.471<br>down | AdhP Zn-dependent alcohol dehydrogenases     |
| 58418 |   |   |   |   |   |   |               |               | $\beta$ -lactamase-like protein              |
| 58421 |   |   |   |   |   |   |               |               | FAD binding protein                          |
| 58427 | + | + | + | + | + | + |               |               | ATP-dependent helicase. DEAD-box             |
| 58428 | + | + | + | + | + | + |               |               | Ribosomal biogenesis regulatory protein RRS1 |
| 58431 |   |   |   |   |   |   | 1.400 up      | 2.947 up      | unknown protein                              |
| 58442 |   | + |   |   |   |   |               |               | unknown protein                              |
| 58450 |   |   |   |   |   |   | 1.176 up      | 2.349 up      | GH3 $\beta$ -xylosidase XYL3b                |
| 58456 |   |   |   |   |   |   | 9.297<br>down | 5.379<br>down | Zn2Cys6 transcriptional regulator            |
| 58466 |   |   |   |   |   |   |               |               | alcohol dehydrogenase. putative              |
| 58472 |   |   |   |   |   |   |               |               | Catalase                                     |
| 58475 | + | + | + | + | + | + |               |               | unknown protein                              |
| 58476 | + | + | + | + | + | + |               |               | serine/threonine protein kinase              |
| 58479 |   |   |   |   |   |   | 1.418<br>down | 3.365<br>down | short chain dehydrogenase/reductase          |
| 58489 | + | + | + | + | + | + |               |               | unknown protein                              |

|       |   |   |   |   |   |   |            |             |                                                                                          |
|-------|---|---|---|---|---|---|------------|-------------|------------------------------------------------------------------------------------------|
| 58492 | + | + | + | + | + | + | 1.397 up   | 2.204 up    | unknown protein                                                                          |
| 58493 | + | + | + | + | + | + |            |             | Cytochrome c oxidase. subunit Vb                                                         |
| 58505 | + | + | + |   |   |   |            |             | cytochrome P450                                                                          |
| 58509 |   |   |   |   |   |   | 1.223 up   | 2.335 down  | DNA ligase IV involved in non-homologous end joining of double-strand DNA breaks         |
| 58511 | + | + | + |   |   |   | 3.383 down | 10.118 down | amino acid permease (GABA)                                                               |
| 58519 | + | + | + | + | + | + |            |             | unknown protein                                                                          |
| 58521 |   |   |   |   |   |   | 1.160 up   | 3.571 up    | SAM (and some other nucleotide) binding motif                                            |
| 58525 |   |   |   |   |   |   | 2.797 down | 3.337 down  | unknown protein                                                                          |
| 58535 |   |   |   |   |   |   | 1.475 up   | 8.270 up    | unknown protein                                                                          |
| 58539 | + | + | + | + | + | + |            |             | Mitochondrial ribosomal protein of the small subunit. has similarity to mammalian apopto |
| 58541 |   |   |   |   |   |   |            |             | unknown protein with Kelch repeats                                                       |
| 58549 | + | + | + | + | + | + |            |             | cellular morphogenesis regulator DopA. putative                                          |
| 58550 |   |   |   |   |   |   |            |             | glycan biosynthesis protein (PigL).                                                      |
| 58560 |   |   |   |   |   |   | 1.242 down | 2.103 down  | MFS monocarboxylate transporter                                                          |
| 58561 | + | + |   |   |   |   |            |             | MFS permease                                                                             |
| 58563 |   |   |   |   |   |   | 1.004 up   | 2.070 up    | oxalate decarboxylase                                                                    |
| 58574 |   |   |   |   |   |   | 1.092 up   | 2.601 up    | unknown protein                                                                          |
| 58580 |   |   |   |   |   |   |            |             | $\alpha$ -ketoglutarate dependent (Fell) oxygenase                                       |
| 58584 |   |   |   | + |   |   |            |             | aquaglyceroporin                                                                         |
| 58587 | + | + | + | + | + | + |            |             | Protein phosphatase 2C type Ptc1                                                         |
| 58601 |   |   |   |   |   |   | 1.251 down | 3.900 up    | unknown protein                                                                          |
| 58602 |   |   |   |   |   |   |            |             | unknown protein                                                                          |
| 58603 |   |   |   | + |   |   | 1.070 up   | 4.702 up    | unknown protein. contains Splecktrin motif                                               |
| 58607 | + | + | + | + | + | + |            |             | chromosome condensation protein (CrcB). putative                                         |
| 58609 | + | + | + | + | + | + |            |             | GT $\alpha$ -1.6-mannosyltransferase                                                     |
| 58612 | + | + | + | + | + | + |            |             | unknown proteinsterol binding protein                                                    |

|       |   |   |   |   |   |   |                |               |                                                                                         |
|-------|---|---|---|---|---|---|----------------|---------------|-----------------------------------------------------------------------------------------|
| 58613 | + | + | + | + |   |   |                |               | Thiamine pyrophosphokinase                                                              |
| 58627 | + | + | + | + | + | + |                |               | ATP-dependent RNA helicase dbp9                                                         |
| 58628 | + | + | + | + | + | + |                |               | C2H2 transcription factor (Con7)                                                        |
| 58631 | + | + | + | + | + | + |                |               | Rad5p. a ubiquitin-protein ligase that functions in DNA damage tolerance                |
| 58634 | + | + | + | + | + | + | 1.499<br>down  | 3.290<br>down | Zn2Cys6 Fungal transcriptional regulator                                                |
| 58636 | + | + | + | + | + | + |                |               | vacuolar fusion protein MON1                                                            |
| 58638 | + | + | + | + | + | + |                |               | vacuolar-sorting protein SNF8. putative                                                 |
| 58639 |   |   |   |   |   |   | 10.563<br>down | 2.584<br>down | unknown protein                                                                         |
| 58640 | + | + | + | + | + | + | 1.516 up       | 2.972 up      | unknown protein                                                                         |
| 58651 | + | + | + | + | + | + | 1.084<br>down  | 2.597 up      | adenylosuccinate synthase                                                               |
| 58654 |   |   |   |   |   |   |                |               | geranylgeranyltransferase beta subunit                                                  |
| 58658 | + | + |   |   |   |   |                |               | DNA helicase. putative                                                                  |
| 58669 |   |   |   |   |   |   |                |               | aspartyl protease                                                                       |
| 58672 |   |   |   |   |   |   |                |               | short chain dehydrogenase/reductase                                                     |
| 58675 |   |   |   |   |   |   | 1.577<br>down  | 4.152<br>down | short chain dehydrogenase/reductase                                                     |
| 58689 |   |   |   |   |   |   | 1.277<br>down  | 2.717<br>down | ERG5 C-22 sterol desaturase. a cytochrome P450 enzyme that catalyzes the formation of t |
| 58694 | + | + | + | + | + | + | 1.700<br>down  | 2.232<br>down | unknown protein                                                                         |
| 58696 |   |   |   |   |   |   |                |               | DEAD/DEAH box helicase                                                                  |
| 58698 |   |   |   |   |   |   |                |               | subtilisin like protease (SUB2)                                                         |
| 58699 |   |   |   |   |   |   | 1.682<br>down  | 2.440<br>down | unknown protein                                                                         |
| 58701 |   |   |   |   |   |   |                |               | Mannose-6-phosphate isomerase                                                           |
| 58717 |   |   |   |   |   |   |                |               | $\beta$ -lactamase class C                                                              |
| 58731 |   |   |   |   |   |   |                |               | unknown protein                                                                         |
| 58734 |   | + |   |   |   |   | 1.390 up       | 3.106 up      | prefoldin subunit 2                                                                     |

|       |   |   |   |   |   |   |               |               |                                                                                      |
|-------|---|---|---|---|---|---|---------------|---------------|--------------------------------------------------------------------------------------|
| 58746 | + | + | + |   |   |   | 1.343<br>down | 2.596<br>down | unknown protein                                                                      |
| 58753 |   | + | + |   |   |   |               |               | MmsB. 3-hydroxyisobutyrate dehydrogenase                                             |
| 58765 |   |   |   |   |   |   |               |               | unknown protein                                                                      |
| 58767 |   |   |   |   |   |   |               |               | unknown protein                                                                      |
| 58772 |   |   | + |   |   |   |               |               | cytochrome P450 monooxygenase                                                        |
| 58774 |   |   |   |   |   |   |               |               | unknown protein                                                                      |
| 58783 | + | + | + | + | + | + |               |               | alpha/beta hydrolase                                                                 |
| 58790 |   |   |   |   |   |   |               |               | glycerol-3-phosphate phosphatase. putative                                           |
| 58802 |   |   |   |   |   |   |               |               | GH95 $\alpha$ -L-fucosidase                                                          |
| 58804 |   |   |   |   |   |   |               |               | Rad9. that functions in DNARepair                                                    |
| 58814 |   |   |   |   |   |   |               |               | unknown protein with WD repeats                                                      |
| 58815 | + | + | + | + | + | + |               |               | alternative NADH-dehydrogenase. putative                                             |
| 58823 |   |   |   |   |   |   | 1.531 up      | 2.674 up      | MRSP1/expansin-like                                                                  |
| 58837 |   |   |   |   |   |   | 1.566<br>down | 2.698<br>down | unknown protein                                                                      |
| 58848 |   |   |   |   |   |   | 1.314<br>down | 2.539 up      | unknown protein                                                                      |
| 58851 |   |   |   |   |   |   |               |               | Phosphatidylserine receptor protein. contains F-box and transcription factor jumonji |
| 58853 |   |   |   |   |   |   | 2.977 up      | 19.052 up     | Homeodomain-like                                                                     |
| 58856 | + | + | + | + | + | + |               |               | phosducin like protein. class I                                                      |
| 58857 |   |   |   |   |   |   |               |               | unknown protein                                                                      |
| 58867 |   |   |   |   |   |   |               |               | unknown protein                                                                      |
| 58869 | + | + |   |   |   |   |               |               | unknown protein                                                                      |
| 58880 |   |   |   |   |   |   | 1.041<br>down | 5.309 up      | MRSP1/expansin-like                                                                  |
| 58885 |   |   |   |   |   |   |               |               | Amidases                                                                             |
| 58887 |   |   |   |   |   |   | 1.134<br>down | 2.799 up      | GH78 $\alpha$ -L-rhamnosidase                                                        |
| 58897 | + | + | + | + | + | + | 1.497<br>down | 3.468<br>down | C2H2 transcriptional regulator                                                       |



|       |   |   |   |   |   |   |               |               |  |                                                       |
|-------|---|---|---|---|---|---|---------------|---------------|--|-------------------------------------------------------|
| 58899 | + | + | + |   |   |   |               |               |  | MDR-type ABC transporters                             |
| 58910 |   |   |   |   |   |   |               |               |  | unknown protein                                       |
| 58918 |   |   |   |   |   |   |               |               |  | Zn2Cys6 transcriptional regulator                     |
| 58928 | + | + | + | + | + | + |               |               |  | SNF2 family chromodomain-helicase DNA-binding protein |
| 58952 |   |   |   |   |   |   | 1.547<br>down | 2.103<br>down |  | calcium transporting ATPase. ion pump                 |
| 58953 |   |   |   |   |   |   |               |               |  | Cytochrome P450 CYP3/CYP5/CYP6/CYP9 subfamilies       |
| 58960 | + | + | + | + | + | + |               |               |  | unknown protein                                       |
| 58971 |   |   |   |   |   |   |               |               |  | RNA cap guanine-N2 methyltransferase. putative        |
| 58976 | + | + | + | + | + | + |               |               |  | RRN3. required for the transcription of rDNA          |
| 58989 |   |   |   |   |   |   |               |               |  | unknown protein                                       |
| 58990 | + | + | + | + | + | + | 1.491 up      | 2.112 up      |  | v-SNARE Bos1. ER-Golgi                                |
| 59002 |   |   |   |   |   |   |               |               |  | unknown protein                                       |
| 59014 |   |   |   |   |   |   |               |               |  | PDR-type ABC transporters                             |
| 59023 | + | + | + | + | + | + |               |               |  | Fe superoxide dismutase                               |
| 59028 |   |   | + |   |   |   | 2.016 up      | 4.997 up      |  | unknown protein                                       |
| 59042 | + | + | + | + | + | + |               |               |  | unknown protein                                       |
| 59050 |   |   |   |   |   |   | 1.216<br>down | 9.714 up      |  | Ankyrin                                               |
| 59053 | + | + | + | + | + | + | 1.156<br>down | 2.291<br>down |  | Adenosine/AMP deaminase                               |
| 59056 |   |   |   |   |   |   |               |               |  | unknown protein                                       |
| 59062 | + | + | + | + | + | + |               |               |  | unknown protein                                       |
| 59065 |   |   |   |   |   |   | 1.339 up      | 2.752 up      |  | unknown protein                                       |
| 59067 | + | + | + | + | + | + | 1.180 up      | 2.397 up      |  | Zn2Cys6 transcriptional regulator                     |
| 59068 |   |   |   |   |   |   |               |               |  | thiamin biosynthesis protein thi-4 . putative         |
| 59070 | + | + | + | + | + | + |               |               |  | peroxisome biosynthesis protein (PAS1/Peroxin-1).     |
| 59073 |   |   |   |   |   |   | 1.110<br>down | 2.213<br>down |  | unknown protein                                       |
| 59078 |   |   |   |   |   |   |               |               |  | unknown protein                                       |
| 59081 |   |   |   |   |   |   | 1.066 up      | 3.150 up      |  | CsdB Selenocysteine lyase                             |



|       |   |   |   |   |   |   |                |                |                                             |
|-------|---|---|---|---|---|---|----------------|----------------|---------------------------------------------|
| 59272 |   |   |   |   |   |   | 1.314<br>down  | 3.044<br>down  | MFS permease                                |
| 59280 | + | + | + | + | + | + |                |                | ARP23 complex 20 kDa subunit                |
| 59296 |   |   |   |   |   |   |                |                | anaphase-promoting complex protein          |
| 59302 | + | + | + | + | + | + |                |                | unknown protein                             |
| 59315 |   |   |   |   |   |   | 1.723 up       | 2.386<br>down  | PKS                                         |
| 59322 |   |   |   |   |   |   | 2.327<br>down  | 5.863<br>down  | Zinc-binding oxidoreductase                 |
| 59333 |   |   |   |   |   |   | 1.215 up       | 4.018 up       | MFS permease                                |
| 59338 |   |   |   |   |   |   |                |                | D-Alanine aminotransferase                  |
| 59346 | + | + | + | + | + | + |                |                | chitin biosynthesis protein CHS5            |
| 59351 |   |   |   |   |   |   | 2.679<br>down  | 3.796<br>down  | 1-aminocyclopropane-1-carboxylate synthase  |
| 59352 |   |   |   |   |   |   | 1.659<br>down  | 3.656<br>down  | cytochrome P450                             |
| 59353 |   |   |   |   |   |   | 1.228 up       | 2.423<br>down  | Zn2Cys6 transcriptional regulator           |
| 59354 |   |   |   |   |   |   | 2.000<br>down  | 3.047<br>down  | Zn2Cys6 transcriptional regulator           |
| 59359 | + | + | + | + | + | + |                |                | unknown protein                             |
| 59362 |   |   |   |   |   |   |                |                | unknown protein                             |
| 59364 |   |   |   |   |   |   | 16.146<br>down | 25.526<br>down | Sexual differentiation process protein ISP4 |
| 59368 |   |   |   |   |   |   | 5.742 up       | 33.950 up      | unknown protein. Duf341                     |
| 59372 |   |   |   |   |   |   | 21.869<br>down | 3.935<br>down  | unknown protein                             |
| 59377 |   |   |   |   |   |   |                |                | Cytochrome P450 CYP2 subfamily              |
| 59381 |   |   |   |   |   |   | 1.602<br>down  | 6.982<br>down  | SAM-dependent methyltransferases            |
| 59382 | + | + |   | + | + |   | 1.643<br>down  | 9.290<br>down  | unknown protein                             |

|       |  |   |   |   |   |   |               |               |                                                                         |
|-------|--|---|---|---|---|---|---------------|---------------|-------------------------------------------------------------------------|
| 59384 |  |   |   |   |   |   |               |               | histidine kinase class I. M27Mp                                         |
| 59388 |  |   |   |   |   |   |               |               | MFS permease                                                            |
| 59391 |  |   |   |   |   |   | 1.035<br>down | 4.898<br>down | GH27 $\alpha$ -galactosidase                                            |
| 59396 |  |   |   |   |   |   | 1.260<br>down | 2.444 up      | unknown protein                                                         |
| 59402 |  |   |   |   |   |   |               |               | arsenate reductase Arc2                                                 |
| 59417 |  | + |   |   |   |   |               |               | unknown protein                                                         |
| 59434 |  | + | + | + | + | + |               |               | unknown protein                                                         |
| 59435 |  | + | + | + | + | + |               |               | imh1. mediates transport between an endosomal compartment and the Golgi |
| 59472 |  | + | + | + | + | + |               |               | mitochondrial carrier protein                                           |
| 59482 |  |   |   |   |   |   | 2.690 up      | 5.271 up      | PKS                                                                     |
| 59491 |  |   |   |   |   |   | 1.664<br>down | 6.146<br>down | unknown protein                                                         |
| 59508 |  |   |   |   |   |   | 1.443<br>down | 2.313 up      | dipeptidyl peptidase 5                                                  |
| 59515 |  | + | + | + | + | + | 2.504 up      | 3.481 up      | MFS permease                                                            |
| 59542 |  | + | + | + | + | + |               |               | Guanyl-nucleotide exchange factor Sec2                                  |
| 59544 |  | + | + | + | + | + |               |               | SEN1 (tRNA splicing complex component).                                 |
| 59546 |  | + | + | + |   |   | 1.441<br>down | 2.105<br>down | Zn2Cys6 transcriptional regulator                                       |
| 59549 |  |   |   |   |   |   |               |               | beta-alanine synthase                                                   |
| 59553 |  |   |   |   |   |   |               |               | unknown protein                                                         |
| 59558 |  |   |   |   |   |   |               |               | unknown protein                                                         |
| 59578 |  |   |   |   |   |   |               |               | GH13 $\alpha$ -glucosidase                                              |
| 59579 |  | + | + | + | + | + |               |               | unknown protein                                                         |
| 59582 |  |   |   |   |   |   | 1.451 up      | 3.142 up      | unknown protein                                                         |
| 59584 |  | + | + | + | + | + | 1.644 up      | 2.685 up      | unknown protein                                                         |
| 59597 |  |   |   |   |   |   | 1.231 up      | 2.859 up      | unknown protein                                                         |
| 59598 |  |   |   |   |   |   | 1.883<br>down | 4.278<br>down | unknown protein                                                         |

|       |   |   |   |   |   |   |               |               |                                                              |
|-------|---|---|---|---|---|---|---------------|---------------|--------------------------------------------------------------|
| 59609 | + | + | + | + | + | + | 1.007 up      | 2.188<br>down | unknown protein                                              |
| 59624 |   |   |   |   |   |   |               |               | short chain dehydrogenase/reductase                          |
| 59625 |   |   |   |   |   |   |               |               | unknown protein                                              |
| 59628 |   |   |   |   |   |   | 1.342 up      | 4.185 up      | unknown protein                                              |
| 59642 |   |   |   |   |   |   | 1.211<br>down | 3.427<br>down | $\alpha/\beta$ hydrolase lipase/epoxide hydrolase            |
| 59649 |   |   |   |   |   |   | 1.129 up      | 3.892<br>down | Zinc-containing alcohol dehydrogenase                        |
| 59655 |   |   |   |   |   |   |               |               | unknown protein                                              |
| 59665 |   |   |   | + | + | + | 1.031<br>down | 2.486<br>down | unknown protein                                              |
| 59668 | + | + | + | + | + |   |               |               | DBF2. cell cycle protein kinase                              |
| 59669 |   |   |   |   |   |   | 1.081 up      | 2.171<br>down | extracellular salicylate hydroxylase/monooxygenase. putative |
| 59672 |   |   |   |   |   |   |               |               | nitroreductase family protein                                |
| 59673 |   |   |   |   |   |   |               |               | acetyltransferase. GNAT family family                        |
| 59689 |   |   |   |   |   |   | 1.219<br>down | 2.438<br>down | GH2 $\beta$ -mannosidase                                     |
| 59690 |   |   |   |   |   |   | 1.119<br>down | 3.442 up      | unknown protein                                              |
| 59697 | + | + | + | + | + | + |               |               | unknown protein                                              |
| 59698 |   |   |   |   |   |   |               |               | short chain dehydrogenase/reductase                          |
| 59700 |   |   |   |   |   |   |               |               | short chain dehydrogenase/reductase                          |
| 59705 | + | + | + | + | + | + |               |               | unknown protein                                              |
| 59723 |   |   |   |   |   |   |               |               | dipeptidyl peptidase 5                                       |
| 59726 |   |   |   |   |   |   | 1.062 up      | 5.297 up      | DNA photolyase. N-terminal. class 1. FAD-binding             |
| 59740 |   |   |   |   |   |   | 1.298<br>down | 3.502<br>down | transcriptional regulator. unknown                           |
| 59746 |   |   |   |   |   |   | 1.158<br>down | 3.233<br>down | oxaloacetase-like protein                                    |

|       |  |   |  |  |  |  |  |  |  |               |               |                                                                          |
|-------|--|---|--|--|--|--|--|--|--|---------------|---------------|--------------------------------------------------------------------------|
| 59747 |  |   |  |  |  |  |  |  |  | 1.417<br>down | 2.643<br>down | Rho GTPase-activating protein involved in signal transduction mechanisms |
| 59751 |  |   |  |  |  |  |  |  |  | 1.475<br>down | 2.093<br>down | Ribonucleases P/MRP protein subunit POP1 containing protein              |
| 59759 |  | + |  |  |  |  |  |  |  |               |               | unknown protein                                                          |
| 59760 |  |   |  |  |  |  |  |  |  |               |               | Zn2Cys6 transcriptional regulator                                        |
| 59763 |  |   |  |  |  |  |  |  |  | 2.804 up      | 4.151 up      | unknown protein                                                          |
| 59768 |  |   |  |  |  |  |  |  |  |               |               | unknown protein                                                          |
| 59770 |  |   |  |  |  |  |  |  |  | 1.525<br>down | 3.754<br>down | aryl-alcohol dehydrogenases                                              |
| 59771 |  |   |  |  |  |  |  |  |  |               |               | UbiA prenyltransferase. putative                                         |
| 59775 |  |   |  |  |  |  |  |  |  |               |               | unknown protein                                                          |
| 59778 |  |   |  |  |  |  |  |  |  | 1.104<br>down | 5.861<br>down | GPCR. related to A nidulans GprC                                         |
| 59791 |  |   |  |  |  |  |  |  |  | 1.143 up      | 4.978 up      | GH18. chitinase CHI18-15                                                 |
| 59796 |  |   |  |  |  |  |  |  |  | 1.407<br>down | 2.193<br>down | MFS permease                                                             |
| 59801 |  | + |  |  |  |  |  |  |  | 1.082<br>down | 3.116 up      | unknown protein                                                          |
| 59814 |  |   |  |  |  |  |  |  |  |               |               | transcriptional regulator. unknown                                       |
| 59827 |  |   |  |  |  |  |  |  |  | 1.592 up      | 4.546 up      | unknown protein                                                          |
| 59830 |  |   |  |  |  |  |  |  |  |               |               | short-chain dehydrogenase/reductase                                      |
| 59833 |  |   |  |  |  |  |  |  |  | 2.185<br>down | 2.973<br>down | unknown protein                                                          |
| 59836 |  |   |  |  |  |  |  |  |  |               |               | nuclear transport factor 2 domain-containing protein                     |
| 59838 |  |   |  |  |  |  |  |  |  |               |               | unknown protein                                                          |
| 59843 |  |   |  |  |  |  |  |  |  | 1.113 up      | 2.512<br>down | AMP-dependent synthetase and ligase. acetoacetyl-CoA synthase-like       |
| 59846 |  |   |  |  |  |  |  |  |  |               |               | lanosterol synthase                                                      |
| 59862 |  |   |  |  |  |  |  |  |  |               |               | t-SNARE Tlg1; fusion endosome-derived vesicles with late Golgi           |
| 59876 |  |   |  |  |  |  |  |  |  | 1.341<br>down | 5.318 up      | xenobiotic compound monounknown proteingenease. DszA family              |

|       |   |  |   |   |   |   |   |               |               |                                                                                             |
|-------|---|--|---|---|---|---|---|---------------|---------------|---------------------------------------------------------------------------------------------|
| 59887 |   |  |   |   |   |   |   | 5.385<br>down | 4.318<br>down | L-lactate dehydrogenase. putative                                                           |
| 59894 |   |  |   |   |   |   |   |               |               | Phosphatidylinositol transfer protein                                                       |
| 59900 |   |  |   |   |   |   |   |               |               | unknown protein                                                                             |
| 59919 |   |  | + | + | + | + | + |               |               | RNase III domain protein                                                                    |
| 59936 |   |  | + | + | + | + | + | 1.599 up      | 2.570 up      | unknown protein                                                                             |
| 59940 |   |  | + | + | + | + |   | 3.732<br>down | 3.082<br>down | unknown protein                                                                             |
| 59944 |   |  | + | + | + | + | + |               |               | calcineurin catalytic subunit                                                               |
| 59951 |   |  | + | + | + | + |   |               |               | CobW domain protein                                                                         |
| 59952 |   |  |   |   |   |   |   | 2.117 up      | 5.176<br>down | Amino acid transporter PotE                                                                 |
| 59958 |   |  | + | + | + | + | + |               |               | unknown protein                                                                             |
| 59964 |   |  | + | + | + | + | + |               |               | DNA replication factor A subunit Ssb3. putative                                             |
| 59987 |   |  | + | + | + | + | + |               |               | Ubiquitin conjugating enzyme Ubc7                                                           |
| 59988 |   |  | + | + | + | + | + |               |               | ATP-dependent RNA helicase HAS1                                                             |
| 59991 |   |  | + | + | + | + | + |               |               | MAK16 protein. putative                                                                     |
| 59994 |   |  |   |   |   |   |   |               |               | tRNA isopentenyltransferase.                                                                |
| 60000 |   |  | + | + | + | + | + |               |               | ubiquitin-conjugating enzyme                                                                |
| 60002 | + |  | + |   |   |   |   |               |               |                                                                                             |
| 60004 |   |  |   |   |   |   |   | 1.338<br>down | 2.648<br>down | Zn2Cys6 transcriptional regulator                                                           |
| 60008 |   |  | + | + | + | + | + |               |               | ribosomal protein MRPL35.                                                                   |
| 60018 |   |  |   |   |   |   |   |               |               | AAA+ ATPase                                                                                 |
| 60028 |   |  |   |   |   |   |   | 1.122<br>down | 3.193 up      | unknown protein                                                                             |
| 60033 |   |  | + | + | + | + | + |               |               | short chain dehydrogenase/reductase                                                         |
| 60051 |   |  | + | + | + | + | + |               |               | GCN2. a kinase phosphorylating the alpha subunit of the translation initiation factor eIF2. |
| 60052 |   |  |   |   |   |   |   | 1.895<br>down | 4.237<br>down | short chain dehydrogenase/reductase                                                         |
| 60067 |   |  | + | + | + | + | + |               |               | L-threo-3-deoxy-hexulosonate aldolase                                                       |





|       |   |   |   |   |   |   |   |               |                                        |                                                                                   |
|-------|---|---|---|---|---|---|---|---------------|----------------------------------------|-----------------------------------------------------------------------------------|
| 60255 |   | + | + | + |   |   |   |               | tRNA-splicing endonuclease beta chain. |                                                                                   |
| 60270 |   | + | + | + | + | + | + | 1.362<br>down | 2.202<br>down                          | unknown protein                                                                   |
| 60282 |   |   |   |   |   |   |   | 1.318<br>down | 2.532<br>down                          | Zn2Cys6 transcriptional regulator                                                 |
| 60283 |   | + | + | + | + | + | + |               |                                        | unknown protein                                                                   |
| 60300 |   | + | + | + | + | + | + |               |                                        | unknown protein                                                                   |
| 60319 |   | + | + | + | + | + | + |               |                                        | unknown protein                                                                   |
| 60328 |   |   |   |   |   |   |   | 1.299<br>down | 3.043<br>down                          | unknown protein                                                                   |
| 60329 | + |   |   |   |   |   |   |               |                                        | MFS permease                                                                      |
| 60331 |   | + | + | + | + | + | + |               |                                        | Small GTPase of the Rab/Ypt family. ypt7 and rab7 involved in vacuolar biogenesis |
| 60337 |   |   |   |   |   |   |   | 7.097<br>down | 2.932<br>down                          | unknown protein                                                                   |
| 60338 |   | + | + | + | + | + | + |               |                                        | SAM methyltransferase. tRNA-methyltransferase subunit GCD14 (yeast).              |
| 60345 |   | + | + | + | + | + | + |               |                                        | unknown protein                                                                   |
| 60346 |   | + | + | + | + | + | + |               |                                        | Para-aminobenzoate (PABA) synthase PabaA                                          |
| 60349 |   | + | + | + | + | + | + |               |                                        | Exocyst component Sec8                                                            |
| 60352 |   |   |   |   |   |   |   | 3.078<br>down | 4.788<br>down                          | NADH-dehydrogenase (ubiquinone)                                                   |
| 60370 |   |   |   |   |   |   |   | 5.514<br>down | 3.175<br>down                          | unknown protein                                                                   |
| 60374 |   |   |   |   |   |   |   |               |                                        | choline oxidase                                                                   |
| 60378 |   |   |   |   |   |   |   | 2.670 up      | 2.164<br>down                          | AAA ATPase                                                                        |
| 60392 |   | + | + | + | + | + | + |               |                                        | Mitochondrial import inner membrane translocase. subunit Tim17/22                 |
| 60402 |   |   |   |   |   |   |   |               |                                        | tRNA modification GTPase TrmE. putative                                           |
| 60406 |   | + | + | + | + | + | + |               |                                        | mitochondrial matrix iron-sulfur protein                                          |
| 60418 |   |   |   |   |   |   |   | 1.458 up      | 2.832 up                               | Aldehyde dehydrogenase                                                            |
| 60419 |   |   |   |   |   |   |   | 1.005<br>down | 2.848 up                               | acid phosphatase. putative                                                        |

|       |   |   |   |   |   |   |                |               |                                                                                    |
|-------|---|---|---|---|---|---|----------------|---------------|------------------------------------------------------------------------------------|
| 60422 |   |   |   |   |   |   | 2.764<br>down  | 2.876<br>down | unknown protein                                                                    |
| 60425 |   | + |   |   |   |   |                |               | Mechanosensitive ion channel family protein                                        |
| 60426 | + | + | + | + | + | + |                |               | unknown protein                                                                    |
| 60445 |   |   |   |   |   |   | 3.424<br>down  | 9.081<br>down | unknown protein                                                                    |
| 60450 | + | + | + | + | + | + |                |               | Hus1 protein of Schizosaccharomyces pombe and mammals. a component of the 9-1-1 re |
| 60456 |   |   |   |   |   |   | 1.149 up       | 2.137<br>down | unknown protein                                                                    |
| 60458 |   |   |   |   |   |   |                |               | NRPS                                                                               |
| 60467 |   |   |   |   |   |   |                |               | MFS monocarboxylate transporter. putative                                          |
| 60482 |   | + |   |   |   |   |                |               | unknown protein                                                                    |
| 60487 |   |   |   |   |   |   |                |               | unknown protein                                                                    |
| 60489 |   |   |   |   |   |   | 2.666<br>down  | 2.296 up      | CE5 cutinase                                                                       |
| 60490 |   |   |   |   |   |   | 1.104 up       | 2.155<br>down | 2-nitropropane dioxygenase                                                         |
| 60492 |   |   |   |   |   |   |                |               | unknown protein                                                                    |
| 60493 | + | + | + |   |   |   |                |               | ribosomal RNA methyltransferase RrmJ/FtsJ domain.                                  |
| 60498 | + | + | + | + | + | + |                |               | unknown protein                                                                    |
| 60508 |   |   |   |   |   |   |                |               | unknown protein                                                                    |
| 60517 |   |   |   |   |   |   |                |               | short chain dehydrogenase/reductase                                                |
| 60518 |   |   |   |   |   |   |                |               | short chain dehydrogenase/reductase                                                |
| 60551 | + | + | + | + | + | + |                |               | PotE Amino acid transporters                                                       |
| 60557 |   |   |   |   |   |   | 1.123 up       | 2.760 up      | unknown protein                                                                    |
| 60558 |   |   |   |   |   |   |                |               | Zn2Cys6 transcriptional regulator                                                  |
| 60560 |   |   |   |   |   |   | 31.933<br>down | 2.174<br>down | unknown protein                                                                    |
| 60562 |   |   |   |   |   |   |                |               | unknown protein                                                                    |
| 60564 |   |   |   |   |   |   |                |               | mitochondrial mRNA processing protein PET127. putative                             |

|       |   |   |   |   |   |   |            |            |                                                                                         |
|-------|---|---|---|---|---|---|------------|------------|-----------------------------------------------------------------------------------------|
| 60565 |   |   |   |   |   |   | 1.012 up   | 4.780 down | unknown protein                                                                         |
| 60578 | + | + | + | + | + | + | 1.131 down | 2.268 down | Zn2Cys6 transcriptional regulator                                                       |
| 60581 |   |   |   |   |   |   |            |            | acetylornithine deacetylase                                                             |
| 60585 |   |   |   |   |   |   |            |            | C2H2 transcriptional regulator                                                          |
| 60591 | + | + | + | + | + | + |            |            | unknown protein                                                                         |
| 60608 |   |   |   |   |   |   |            |            | unknown protein                                                                         |
| 60616 | + | + | + | + |   | + | 4.708 down | 3.985 down | unknown protein                                                                         |
| 60626 | + | + | + | + | + | + |            |            | Vesicle coat complex COPII. Sec24                                                       |
| 60627 |   |   |   |   |   |   |            |            | Zn2Cys6 transcriptional regulator                                                       |
| 60634 | + | + | + | + | + | + | 1.156 up   | 2.372 down | transcriptional regulator. unknown                                                      |
| 60635 |   |   |   |   |   |   | 2.154 down | 25.709 up  | GH92 $\alpha$ -1.2-mannosidase                                                          |
| 60638 |   |   |   |   |   |   | 2.099 down | 5.875 up   | unknown protein                                                                         |
| 60664 | + | + | + | + | + | + | 1.239 down | 2.244 down | unknown protein with PH domain (putative phosphatidylinositol 4.5-bisphosphate protein) |
| 60665 |   |   |   |   |   |   |            |            | Zn2Cys6 transcriptional regulator                                                       |
| 60671 |   | + |   |   |   |   |            |            | metallo-beta-lactamase domain protein. putative                                         |
| 60676 | + | + | + | + | + | + |            |            | cysteine protease. mammalian caspases                                                   |
| 60698 | + | + | + | + | + | + |            |            | unknown protein                                                                         |
| 60729 | + | + | + | + | + | + |            |            | unknown protein                                                                         |
| 60737 | + | + | + | + |   | + |            |            | unknown protein                                                                         |
| 60739 |   |   |   |   |   |   |            |            | short-chain dehydrogenase/reductase                                                     |
| 60743 | + | + | + | + | + | + | 1.540 up   | 2.098 up   | Dolichyl-phosphate mannosyltransferase polypeptide 3                                    |
| 60751 |   |   |   |   |   |   |            |            | NRPS                                                                                    |
| 60752 |   |   |   |   |   |   |            |            | dipeptidyl peptidase 5                                                                  |
| 60756 |   |   |   |   |   |   |            |            | unknown protein                                                                         |

|       |   |   |  |   |  |   |  |                |               |                                                             |
|-------|---|---|--|---|--|---|--|----------------|---------------|-------------------------------------------------------------|
| 60758 |   | + |  | + |  | + |  | 12.719<br>down | 5.079<br>down | SAM-dependent methyltransferase                             |
| 60761 |   | + |  | + |  | + |  | 2.016<br>down  | 3.554<br>down | transcriptional regulator Grainyhead/CP2                    |
| 60768 |   |   |  | + |  |   |  |                |               | unknown protein                                             |
| 60769 |   | + |  | + |  |   |  |                |               | Exonuclease                                                 |
| 60771 |   | + |  | + |  | + |  | 1.632 up       | 2.232 up      | prefoldin chaperone                                         |
| 60773 |   |   |  | + |  |   |  |                |               | ankyrin                                                     |
| 60779 |   | + |  | + |  | + |  |                |               | unknown protein                                             |
| 60780 |   | + |  | + |  | + |  |                |               | unknown protein                                             |
| 60784 |   |   |  |   |  |   |  |                |               | FAD-binding protein                                         |
| 60791 |   |   |  |   |  |   |  |                |               | subtilisin like protease                                    |
| 60793 |   | + |  | + |  | + |  |                |               | unknown protein                                             |
| 60796 |   | + |  | + |  | + |  |                |               | mitochondrial ribosomal protein subunit S4                  |
| 60810 |   |   |  |   |  |   |  | 12.659<br>down | 3.051<br>down | unknown protein. GPR1/FUN34/yaaH protein. 6TMs              |
| 60814 |   |   |  |   |  |   |  |                |               | glutamyl-tRNA amidotransferase subunit B in other fungi.    |
| 60815 |   | + |  | + |  | + |  |                |               | CRAL/TRIO domain-containing protein                         |
| 60825 |   |   |  |   |  |   |  | 1.099 up       | 4.054 up      | Cytochrome P450. putative                                   |
| 60835 |   |   |  |   |  |   |  | 1.105<br>down  | 2.255<br>down | PutA delta-1-pyrroline-5-carboxylate dehydrogenase          |
| 60847 |   | + |  | + |  | + |  | 1.334<br>down  | 2.048<br>down | Mitochondrial F1F0-ATP synthase. subunit c/ATP9/proteolipid |
| 60849 |   | + |  | + |  | + |  |                |               | FAD-dependent sulfhydryl oxidase Erv1                       |
| 60850 |   | + |  | + |  | + |  | 1.142<br>down  | 2.173<br>down | Mitochondrial initiation factor 2 (IF-2).                   |
| 60855 |   |   |  |   |  |   |  |                |               | tRNA (guanine-N(1)-)-methyltransferase. putative            |
| 60867 | + | + |  | + |  | + |  |                |               | unknown protein                                             |
| 60873 |   | + |  | + |  |   |  |                |               | ATP-dependent DNA ligase                                    |
| 60879 |   | + |  | + |  | + |  |                |               | unknown protein                                             |
| 60887 |   | + |  | + |  | + |  |                |               | unknown protein                                             |

|       |   |   |   |   |   |   |            |            |                                                                                     |
|-------|---|---|---|---|---|---|------------|------------|-------------------------------------------------------------------------------------|
| 60889 |   |   |   |   |   |   |            |            | MFS permease                                                                        |
| 60890 | + | + | + | + | + | + | 1.224 up   | 3.235 up   | L-galactose dehydrogenase (L-GalDH). putative                                       |
| 60897 |   |   |   |   |   |   | 1.013 down | 2.589 down | Zn2Cys6 transcriptional regulator                                                   |
| 60928 | + | + | + | + | + | + |            |            | GTPase involved in G-protein signaling in the adenylate cyclase activating pathway  |
| 60931 |   |   |   |   |   |   | 1.335 up   | 2.042 down | Zn2Cys6 transcriptional regulator                                                   |
| 60945 |   |   | + |   |   |   | 4.781 down | 2.081 up   | MFS permease                                                                        |
| 60949 |   |   |   |   |   |   | 1.906 up   | 2.613 down | unknown protein                                                                     |
| 60951 | + | + | + | + | + | + | 1.275 down | 2.289 down | unknown protein                                                                     |
| 60956 | + | + | + | + | + | + |            |            | unknown protein                                                                     |
| 60981 |   |   |   |   |   |   | 1.043 down | 2.651 down | unknown protein                                                                     |
| 60987 |   |   |   |   |   |   | 1.100 up   | 3.317 down | MRP-type ABC transporter                                                            |
| 60988 |   |   |   |   |   |   |            |            | phosphate transporter                                                               |
| 61000 | + | + | + | + | + | + |            |            | cleavage and polyadenylation specificity factor. putative                           |
| 61020 |   | + | + | + |   | + | 1.740 up   | 2.330 up   | thioesterase superfamily protein                                                    |
| 61032 |   |   |   |   |   |   | 1.363 down | 2.274 down | unknown protein                                                                     |
| 61039 | + | + | + | + | + | + |            |            | Rad27. DNA structure-specific endonucleases involved in Okazaki fragment maturation |
| 61042 | + | + | + | + | + | + |            |            | MMR; inhibition of homeologous recombination                                        |
| 61043 | + | + | + | + | + | + |            |            | unknown protein                                                                     |
| 61055 |   |   |   |   |   |   | 1.851 down | 3.390 up   | unique protein                                                                      |
| 61066 |   |   |   |   |   |   | 1.434 down | 2.615 down | GMC oxidoreductase                                                                  |
| 61074 |   |   |   |   |   |   |            |            | MRP-type ABC transporter                                                            |
| 61075 |   |   |   |   |   |   |            |            | Rad4p. involved in nucleotide excisionRepair.                                       |

|       |   |   |   |   |   |   |            |            |                                                  |
|-------|---|---|---|---|---|---|------------|------------|--------------------------------------------------|
| 61076 |   |   |   |   |   |   |            |            | unknown protein                                  |
| 61078 | + | + | + | + |   |   |            |            | esterase/ lipase                                 |
| 61081 |   |   |   |   |   |   |            |            | histone acetyltransferase SPT10                  |
| 61097 |   |   |   |   |   |   |            |            | unknown protein                                  |
| 61103 | + | + | + | + | + | + |            |            | Signal recognition particle. subunit Srp14       |
| 61114 |   |   |   |   |   |   |            |            | Amino acid transporter LysP                      |
| 61116 |   | + |   |   |   |   | 1.039 up   | 2.148 down | ferric reductase                                 |
| 61121 |   |   |   |   |   |   | 1.160 down | 2.413 down | arylsulfatase. putative                          |
| 61122 | + | + | + | + | + | + |            |            | unknown protein                                  |
| 61127 | + | + | + | + |   |   | 1.975 down | 3.274 down | Serine carboxypeptidase                          |
| 61134 | + | + | + | + | + | + | 1.429 up   | 2.205 up   | unknown protein                                  |
| 61142 |   |   |   |   |   |   |            |            | unknown protein                                  |
| 61153 | + | + | + | + | + | + |            |            | uroporphyrinogen synthase                        |
| 61159 | + | + | + | + | + | + |            |            | Component of oligomeric golgi complex Cog3/Sec34 |
| 61161 | + | + | + | + | + | + |            |            | Peptidase S54. rhomboid                          |
| 61164 |   |   |   |   |   |   |            |            | unknown protein                                  |
| 61183 |   |   |   |   |   |   |            |            | Polynucleotide 5'-hydroxyl-kinase GRC3. putative |
| 61189 | + | + | + | + | + | + |            |            | tubulin-specific chaperone c                     |
| 61190 | + | + | + | + | + | + | 1.766 up   | 2.218 up   | BolA domain-containing protein                   |
| 61208 | + | + | + | + | + | + |            |            | unique protein                                   |
| 61212 | + | + | + | + | + | + |            |            | cytochrome P450 monooxygenase                    |
| 61219 | + | + | + | + | + | + |            |            | xanthine phosphoribosyltransferase 1             |
| 61222 |   |   |   |   |   |   | 1.149 down | 3.238 down | unknown protein                                  |
| 61223 |   |   | + |   |   |   |            |            | unknown protein                                  |
| 61227 |   |   |   |   |   |   |            |            | cobalamin synthesis protein                      |
| 61229 | + | + | + | + | + | + |            |            | unknown protein                                  |
| 61239 |   |   |   |   |   |   |            |            | unknown protein                                  |

61258

Peptidase C12. ubiquitin carboxyl-terminal hydrolase 1

1.175  
down2.137  
down

61278

MFS permease

61279

+ + + + + +

UTP22. U3 snoRNP protein involved in maturation of pre-18S rRNA and SSU processome p

61284

+ + + + + +

methyltransferase

61288

unknown protein

61292

+ + + + + +

unknown protein

1.030  
down2.666  
down

61293

dipeptidyl peptidase 5

61298

+ + + +

unknown protein

61304

Prolidase and Aminopeptidase P

61307

+ + + + + +

unknown protein

61322

+ + + + + +

poly(A) polymerase with similarity to the DNA polymerase sigma family

61350

MFS permease

61354

unknown protein

61367

+ + + + + +

fatty acid desaturase

61374

MFS permease

61382

+ + + + + +

Integral membrane protein Sys1

1.849  
down2.716  
down

61383

+

unknown protein

61402

+ + + + + +

unknown protein

61403

Hydantoinase/oxoprolinase

61408

+ + + + + +

RAS-GTPase activating protein (RasGAP)

61409

+ + + + + +

unknown protein

61420

+ + + + + +

unknown protein

1.542  
down2.246  
down

61441

+ + + + + +

unknown protein

61442

+ + + + + +

enoyl-CoA hydratase/isomerase

61462

unknown protein

61465

+ + + + + +

SNARE complex subunit Vam7

61470

+ + + + + +

Sar1 GTPase

|       |   |   |   |   |   |   |   |   |   |               |               |                                                                      |
|-------|---|---|---|---|---|---|---|---|---|---------------|---------------|----------------------------------------------------------------------|
| 61471 |   |   |   | + | + | + | + | + | + |               |               | unknown protein                                                      |
| 61476 |   |   |   |   |   |   |   |   |   | 1.409<br>down | 3.821<br>down | Zn2Cys6 transcriptional regulator                                    |
| 61486 |   |   |   |   | + |   |   |   |   |               |               | GPI ethanolamine phosphate transferase                               |
| 61496 |   |   |   | + | + | + |   |   |   | 1.036<br>down | 2.757 up      | MFS permease                                                         |
| 61503 |   |   |   | + | + | + | + | + | + |               |               | unknown protein                                                      |
| 61504 |   |   |   |   |   |   |   |   |   | 2.093<br>down | 3.731<br>down | unknown protein                                                      |
| 61508 |   |   |   | + | + | + | + | + | + |               |               | chromatin assembly protein. putative                                 |
| 61517 |   |   |   | + | + | + | + | + | + |               |               | unknown protein                                                      |
| 61523 |   |   |   | + | + | + | + | + | + |               |               | KTI11 gene that encodes a protein involved in diphthamide synthesis. |
| 61526 |   |   |   |   |   |   |   |   |   | 2.413<br>down | 3.380<br>down | unknown protein                                                      |
| 61530 |   |   |   | + | + | + | + | + | + |               |               | unknown protein                                                      |
| 61532 |   |   |   | + | + | + |   |   |   |               |               | mRNA binding protein Pumilio 2. putative                             |
| 61536 |   |   |   |   |   |   |   |   |   |               |               | aspartyl protease                                                    |
| 61541 |   |   |   | + | + | + | + | + | + |               |               | chromatin remodelling subunit ARP8                                   |
| 61544 |   |   |   | + | + | + | + | + | + |               |               | Rfc3p of <i>Saccharomyces cerevisiae</i> .                           |
| 61550 |   |   |   | + | + | + | + | + | + |               |               | DEAD/DEAH box helicase                                               |
| 61551 |   |   |   | + | + | + | + | + | + |               |               | DNA polymeraseDelta. subunit 4                                       |
| 61553 |   |   |   |   |   |   |   |   |   | 5.669<br>down | 4.651<br>down | D-xylulose 5-phosphate/D-fructose 6-phosphate phosphoketolase        |
| 61556 |   |   |   | + | + | + | + | + | + |               |               | unknown protein                                                      |
| 61567 |   |   |   | + | + | + | + | + | + |               |               | SSCRP                                                                |
| 61570 |   |   |   | + | + | + |   |   |   |               |               | Gβ-WD40 protein Ski8 ( <i>Sordaria</i> )                             |
| 61576 | + | + | + |   |   | + |   |   |   |               |               | unknown protein                                                      |
| 61577 |   |   |   | + | + | + | + | + | + |               |               | unknown protein                                                      |
| 61584 |   |   |   | + | + | + | + | + | + |               |               | unknown protein                                                      |
| 61588 |   |   |   | + | + | + | + | + | + |               |               | unknown protein                                                      |
| 61593 | + | + | + | + | + | + | + | + | + |               |               | unknown protein                                                      |



|       |   |   |   |   |   |   |            |            |                                                                                                            |
|-------|---|---|---|---|---|---|------------|------------|------------------------------------------------------------------------------------------------------------|
| 61595 | + | + | + | + | + | + |            |            | unknown protein                                                                                            |
| 61605 |   |   |   |   |   |   | 9.729 up   | 2.443 up   | Vacuolar sorting protein VPS1, dynamin, and related proteins                                               |
| 61618 |   |   |   |   |   |   | 1.187 up   | 3.255 up   | unknown protein                                                                                            |
| 61632 |   |   |   |   |   |   | 2.128 up   | 2.019 up   | unknown protein                                                                                            |
| 61642 | + | + | + |   |   |   | 1.927 down | 3.207 down | unknown protein, secreted                                                                                  |
| 61675 | + | + |   |   |   |   |            |            | unknown protein                                                                                            |
| 61677 | + | + | + | + | + | + |            |            | sphingosine-1-phosphate phosphohydrolase                                                                   |
| 61690 |   | + |   |   |   |   |            |            | short chain dehydrogenase/reductase                                                                        |
| 61692 | + | + | + | + | + | + |            |            | Chromosome condensation protein 3, C-terminal                                                              |
| 61701 | + | + | + | + | + | + |            |            | Metal-dependent hydrolases belonging to the beta-lactamase superfamily.                                    |
| 61703 | + | + | + | + |   | + | 1.316 up   | 2.241 up   | germinal center kinase, related to <i>S. cerevisiae</i> Kic1                                               |
| 61705 | + | + |   |   |   |   |            |            | sterol o-acyltransferase                                                                                   |
| 61715 | + | + | + | + | + | + |            |            | unknown protein                                                                                            |
| 61720 | + | + | + | + | + | + |            |            | histidine kinase class X, HHK1                                                                             |
| 61746 |   |   |   |   |   |   |            |            | phospholipase C, related to <i>Cryphonectria parasitica</i> phosphatidyl inositol-specific phospholipase C |
| 61750 | + | + | + | + | + | + |            |            | Sur2 sphinganine C4-hydroxylase of <i>Saccharomyces cerevisiae</i>                                         |
| 61763 |   |   | + |   |   |   |            |            | unknown protein                                                                                            |
| 61765 |   | + |   |   |   |   |            |            | Peptidase D                                                                                                |
| 61771 |   |   |   |   |   |   |            |            | unknown protein                                                                                            |
| 61794 | + | + | + | + | + | + |            |            | nuclease, mitochondrial                                                                                    |
| 61798 | + | + | + |   |   |   | 1.072 down | 2.271 up   | unknown protein, only in ascomycota                                                                        |
| 61804 | + | + | + | + | + | + |            |            | ribosomal protein Yml32 precursor. Contains possible InterPro domain for ribosomal L32p                    |
| 61815 | + | + | + | + | + | + |            |            | RNA polymerase Rpb6                                                                                        |
| 61819 |   |   |   |   |   |   |            |            | unknown protein                                                                                            |
| 61830 |   |   |   |   |   |   | 1.405 down | 2.945 up   | SSCRP                                                                                                      |
| 61839 |   |   |   |   |   |   |            |            | unknown protein                                                                                            |
| 61858 |   |   |   |   |   |   | 1.334 down | 2.801 up   | unknown protein                                                                                            |

|       |   |   |   |   |   |   |   |   |   |            |            |  |  |  |                                                                                      |
|-------|---|---|---|---|---|---|---|---|---|------------|------------|--|--|--|--------------------------------------------------------------------------------------|
| 61863 |   |   |   | + | + |   |   |   |   |            |            |  |  |  | unknown protein                                                                      |
| 61874 |   |   |   | + | + | + | + | + | + |            |            |  |  |  | Mg <sup>2+</sup> transporter protein. CorA-like                                      |
| 61885 |   |   |   | + | + | + | + | + | + |            |            |  |  |  | unknown protein                                                                      |
| 61893 |   |   |   | + | + | + |   |   |   |            |            |  |  |  | 2.3-diketo-5-methylthio-1-phosphopentane phosphatase                                 |
| 61907 |   |   |   | + | + | + | + | + | + | 1.002 up   | 2.049 down |  |  |  | unknown protein                                                                      |
| 61910 |   |   |   |   | + |   |   |   |   | 1.396 up   | 2.016 down |  |  |  | Aldehyde dehydrogenase                                                               |
| 61912 |   |   |   | + | + | + | + | + | + |            |            |  |  |  | Vacuolar carboxypeptidase Cps1                                                       |
| 61924 |   |   |   | + | + | + | + | + | + |            |            |  |  |  | gelsolin                                                                             |
| 61939 |   |   |   |   |   |   |   |   |   | 1.044 down | 3.007 up   |  |  |  | unknown protein                                                                      |
| 61945 |   |   |   | + | + | + | + | + | + |            |            |  |  |  | unknown protein                                                                      |
| 61946 |   |   |   | + | + | + |   |   |   |            |            |  |  |  | tyrosyl-DNA phosphodiesterase. putative                                              |
| 61948 |   |   |   |   |   |   |   |   |   | 1.383 down | 3.258 up   |  |  |  | Protein disulfide isomerase 2                                                        |
| 61965 |   |   |   | + | + | + | + | + | + |            |            |  |  |  | unknown protein                                                                      |
| 61967 |   |   |   | + | + | + | + | + | + |            |            |  |  |  | unknown protein                                                                      |
| 61971 |   |   |   | + | + | + | + | + | + |            |            |  |  |  | TRAPP complex component Trs33                                                        |
| 61987 |   |   |   |   |   |   |   |   |   | 1.122 down | 2.063 down |  |  |  | unknown protein                                                                      |
| 61988 |   |   |   | + | + | + | + | + | + |            |            |  |  |  | unknown protein                                                                      |
| 61995 | + | + | + | + | + | + | + | + | + | 1.071 up   | 2.258 up   |  |  |  | unknown protein                                                                      |
| 62000 |   |   |   | + | + | + | + | + | + |            |            |  |  |  | twinfilin-1                                                                          |
| 62003 |   |   |   | + | + | + | + | + | + |            |            |  |  |  | signalosome subunit 5 (CsnE) putatively involved in regulation of sexual development |
| 62004 |   |   |   | + | + | + | + | + | + |            |            |  |  |  | unknown protein                                                                      |
| 62017 |   |   |   | + | + | + | + | + | + |            |            |  |  |  | unknown protein                                                                      |
| 62026 |   |   |   | + | + | + | + | + | + |            |            |  |  |  | mediator of RNA polymerase II transcription subunit 10. putative                     |
| 62029 |   |   |   | + | + | + | + | + | + |            |            |  |  |  | pre-mRNA-splicing factor 18                                                          |
| 62034 |   |   |   |   |   |   |   |   |   | 1.683 down | 4.546 down |  |  |  | unknown protein                                                                      |

|       |   |   |   |   |   |   |            |            |                                                      |
|-------|---|---|---|---|---|---|------------|------------|------------------------------------------------------|
| 62040 | + | + | + | + | + | + |            |            | ATPase Sec18. required for ER to Golgi transport etc |
| 62041 |   |   |   |   |   |   |            |            | unknown protein                                      |
| 62053 |   |   |   |   |   |   |            |            | unknown protein                                      |
| 62057 | + | + | + | + | + | + |            |            | DNA repair protein Rhp26/Rad26                       |
| 62059 |   |   |   |   |   |   |            |            | unknown protein                                      |
| 62063 | + | + | + | + | + | + |            |            | U1 small nuclear ribonucleoprotein                   |
| 62071 |   | + |   |   |   |   |            |            | histone acetylase complex subunit                    |
| 62078 |   |   |   |   |   |   |            |            | unknown protein                                      |
| 62086 | + | + | + | + | + | + | 1.555 up   | 2.551 up   | unknown protein                                      |
| 62091 |   |   |   |   |   |   |            |            | Gluconate kinase                                     |
| 62100 | + | + |   |   |   | + |            |            | Hsp30                                                |
| 62103 | + |   | + | + |   |   |            |            | unknown protein                                      |
| 62114 |   |   |   |   |   |   | 1.978 down | 3.675 down | unknown protein                                      |
| 62120 | + | + | + | + | + | + |            |            | importin β KapK                                      |
| 62121 |   |   |   |   |   |   |            |            | HET-E-1 / beta transducin-like protein HET-E2C*4     |
| 62130 | + | + | + |   |   |   |            |            | unknown protein                                      |
| 62153 |   |   |   |   |   |   | 1.503 down | 2.219 down | malate dehydrogenase                                 |
| 62165 |   |   |   |   |   |   |            |            | catechol dioxygenase                                 |
| 62166 |   |   |   |   |   |   |            |            | GH2 β-mannosidase                                    |
| 62168 | + | + | + | + | + | + |            |            | palmitoyltransferase                                 |
| 62169 | + | + | + | + | + | + |            |            | protein kinase                                       |
| 62171 |   | + | + |   |   |   | 1.142 down | 5.770 up   | MFS permease                                         |
| 62172 |   |   |   |   |   |   |            |            | amino acid permease (PotE?)                          |
| 62181 | + | + | + | + | + | + | 1.073 down | 2.658 down | Protein kinase. Ca <sup>2+</sup> -dependent          |
| 62182 | + | + | + | + | + | + |            |            | UDP-glucose:sterol b-glucosyltransferase             |
| 62198 |   |   |   |   |   |   |            |            | Cytosine-purine permease                             |
| 62199 |   | + |   |   |   |   |            |            | Zn2Cys6 transcriptional regulator                    |

|       |   |   |   |   |   |   |               |               |                                                 |
|-------|---|---|---|---|---|---|---------------|---------------|-------------------------------------------------|
| 62213 | + | + | + | + | + | + | 1.021<br>down | 3.707<br>down | unknown protein with fasciclin domain           |
| 62219 | + | + | + | + | + | + |               |               | NADH-quinone oxidoreductase                     |
| 62225 | + | + | + | + | + | + |               |               | unknown protein                                 |
| 62226 | + |   | + |   |   | + |               |               | DNA repair helicase family protein              |
| 62230 |   |   |   |   |   |   |               |               | esterase/lipase                                 |
| 62231 |   |   |   |   |   |   |               |               | Cytochrome P450 CYP3/CYP5/CYP6/CYP9 subfamilies |
| 62232 | + | + | + | + | + | + |               |               | unknown protein                                 |
| 62244 |   |   |   |   |   |   |               |               | Zn2Cys6 transcriptional regulator               |
| 62254 | + | + | + | + | + | + |               |               | Secretion related small GTPase Rab4             |
| 62255 |   |   |   |   |   |   | 1.092 up      | 3.526 up      | lipase. lipocalin related                       |
| 62263 |   |   |   |   |   |   |               |               | Cytochrome P450 CYP2 subfamily                  |
| 62271 |   |   |   |   |   |   |               |               | Acetyltransf_Acetyltransferase (GNAT) family    |
| 62285 |   |   |   |   |   |   | 1.215<br>down | 3.054<br>down | unknown protein                                 |
| 62297 | + | + | + | + | + | + |               |               | Zn2Cys6 transcriptional regulator               |
| 62299 | + | + | + | + | + | + |               |               | unknown protein                                 |
| 62300 |   |   |   |   |   |   |               |               | unknown protein                                 |
| 62301 | + | + | + | + | + | + |               |               | MMR; HR regulation                              |
| 62305 | + | + | + | + | + | + |               |               | UDP-glucose glycoprotein a-glucosyltransferase  |
| 62314 |   |   |   |   |   |   |               |               | unknown protein                                 |
| 62323 |   |   |   |   |   |   | 1.296 up      | 2.216<br>down | unknown protein                                 |
| 62333 |   |   |   |   |   |   | 1.003 up      | 3.830 up      | unknown protein                                 |
| 62335 | + | + | + | + | + | + |               |               | methionine aminopeptidase                       |
| 62340 | + | + | + | + | + | + | 2.892 up      | 2.669 up      | unknown protein                                 |
| 62345 | + | + | + | + | + | + |               |               | translation initiation factor ?                 |
| 62351 | + | + | + | + | + | + |               |               | unknown protein                                 |
| 62352 | + | + | + | + | + | + |               |               | unknown protein                                 |
| 62359 |   |   |   |   |   |   |               |               | isoflavon reductase                             |

|       |   |   |   |   |   |   |                |               |                                                                                       |
|-------|---|---|---|---|---|---|----------------|---------------|---------------------------------------------------------------------------------------|
| 62362 | + | + | + | + | + | + |                |               | calcium transporting ATPase. ion pump                                                 |
| 62367 | + | + | + | + | + | + |                |               | Sulfite oxidase. molybdopterin-binding component                                      |
| 62377 | + | + | + | + | + | + |                |               | GT64 a-N-acetylhexosaminyltransferases                                                |
| 62380 |   |   |   |   |   |   | 18.482<br>down | 2.628<br>down | MFS permease (galactose permease ?)                                                   |
| 62386 |   |   |   |   |   |   |                |               | Zn2Cys6 transcriptional regulator                                                     |
| 62389 | + | + | + | + | + | + |                |               | NADH dehydrogenase (ubiquinone) 1 alpha subcomplex. 13. cell death-regulatory protein |
| 62401 |   |   |   |   |   |   | 1.136<br>down  | 2.453<br>down | guanine nucleotide exchange factor synembryn. putative                                |
| 62424 |   |   |   |   |   |   | 1.165<br>down  | 3.248<br>down | UDP-glucose:sterol b-glucosyltransferase                                              |
| 62426 | + | + | + | + | + | + |                |               | GTPase activator protein for Ras-likeGTPase (RasGAP)                                  |
| 62432 | + | + | + | + | + | + |                |               | Zn2Cys6 transcriptional regulator                                                     |
| 62439 |   |   |   |   |   |   |                |               | short chain dehydrogenase/reductase                                                   |
| 62447 |   |   |   |   |   |   | 1.686<br>down  | 4.938<br>down | unknown protein                                                                       |
| 62462 | + | + | + | + | + | + | 1.475<br>down  | 2.438 up      | PTH11 GPCR                                                                            |
| 62463 |   | + |   |   |   |   |                |               | FAD binding domain containing protein                                                 |
| 62467 | + | + | + | + | + | + |                |               | protein required for sporulation                                                      |
| 62470 | + | + | + | + | + | + |                |               | mitochondrial elongation factor G.                                                    |
| 62475 |   |   |   |   |   |   |                |               | glutathione-dependent formaldehyde-activating                                         |
| 62477 | + | + | + | + | + | + | 2.257 up       | 2.568 up      | Vacuolar protein sorting-associated protein Vps28                                     |
| 62480 | + | + | + | + | + | + | 1.686 up       | 2.049 up      | mitochondrial tricarboxylate transporter (Ctp). putative                              |
| 62484 |   |   |   |   |   |   | 2.877<br>down  | 3.937<br>down | unknown protein                                                                       |
| 62488 |   |   |   |   |   |   | 3.022 up       | 2.780 up      | MFS permease                                                                          |
| 62493 | + | + | + | + | + | + |                |               | chromatin structure-remodeling complex protein RSC1. putative                         |
| 62502 | + |   | + |   |   |   | 1.270 up       | 2.522<br>down | MFS permease                                                                          |
| 62522 |   |   |   |   |   |   |                |               | SSCRP                                                                                 |

|       |   |  |   |   |   |   |   |   |   |                 |                |                                                          |
|-------|---|--|---|---|---|---|---|---|---|-----------------|----------------|----------------------------------------------------------|
| 62535 |   |  | + | + | + |   |   |   |   | unknown protein |                |                                                          |
| 62537 |   |  | + | + | + | + | + | + | + | unknown protein |                |                                                          |
| 62548 |   |  |   |   |   |   |   |   |   | unknown protein |                |                                                          |
| 62556 |   |  | + | + | + | + | + | + | + | 2.118<br>down   | 3.153<br>down  | unknown protein                                          |
| 62563 |   |  | + | + | + | + | + | + | + |                 |                | phosphatidylinositol-glycan biosynthesis class S protein |
| 62576 |   |  | + |   | + |   |   |   |   |                 |                | alpha/beta hydrolase                                     |
| 62577 |   |  | + | + | + | + | + | + | + |                 |                | unknown protein                                          |
| 62581 |   |  |   |   |   |   |   |   |   |                 |                | gluconolactonase-like protein                            |
| 62583 |   |  | + | + | + | + | + | + | + |                 |                | phosphate phosphoenolpyruvate translocator protein       |
| 62603 |   |  |   |   |   |   |   |   |   |                 |                | unknown protein                                          |
| 62611 |   |  | + | + | + | + | + | + | + | 1.888<br>down   | 8.764<br>down  | MRP-type ABC transporter                                 |
| 62613 |   |  | + | + | + | + | + | + | + |                 |                | meiotically up-regulated protein                         |
| 62622 |   |  |   |   |   |   |   |   |   |                 |                | Zn2Cys6 transcriptional regulator                        |
| 62633 |   |  |   |   |   |   |   |   |   |                 |                | unknown protein                                          |
| 62634 |   |  |   |   |   |   |   |   |   |                 |                | anaphase promoting complex subunit APC11                 |
| 62643 |   |  |   |   |   |   |   |   |   |                 |                | SAM-dependent methyltransferases                         |
| 62645 |   |  | + | + | + |   |   |   | + |                 |                | GH18. chitinase CHI18-4                                  |
| 62651 |   |  |   |   |   |   |   |   |   | 1.323<br>down   | 5.377<br>down  | long-chain fatty acid transporter.                       |
| 62658 |   |  | + | + | + | + | + | + | + |                 |                | unknown protein                                          |
| 62663 |   |  | + | + | + | + | + | + | + | 1.221 up        | 2.548 up       | unknown protein                                          |
| 62676 |   |  | + | + | + | + | + | + | + |                 |                | unknown protein                                          |
| 62685 | + |  | + | + | + | + | + | + | + |                 |                | Component of oligomeric golgi complex Cog6/Sec37         |
| 62693 |   |  |   |   | + |   |   |   |   | 1.031 up        | 18.111<br>down | ABC-transporter Ste6p                                    |
| 62702 |   |  | + | + | + |   |   |   |   |                 |                | unknown protein                                          |
| 62703 |   |  |   |   | + | + |   |   |   |                 |                | unknown protein                                          |
| 62704 |   |  |   |   |   |   |   |   |   | 1.191<br>down   | 2.177<br>down  | GH18. chitinase CHI18-3                                  |

|       |   |   |   |   |   |   |               |               |                                               |
|-------|---|---|---|---|---|---|---------------|---------------|-----------------------------------------------|
| 62706 | + | + | + | + | + | + |               |               | protein phosphatase                           |
| 62709 | + | + | + | + | + | + |               |               | unknown protein                               |
| 62711 | + | + | + | + | + | + | 1.252<br>down | 2.050<br>down | amino acid transporter                        |
| 62716 |   |   |   |   |   |   | 2.434 up      | 515.554<br>up | Ctr copper transporter family protein         |
| 62718 | + | + | + | + | + | + |               |               | ubiquitin-conjugating enzyme                  |
| 62720 | + | + | + | + | + | + |               |               | unknown protein                               |
| 62721 | + | + | + | + | + | + |               |               | ribosomal protein S8. MRPS8.                  |
| 62747 |   |   | + |   |   |   |               |               | MFS permease                                  |
| 62751 | + | + | + | + | + | + |               |               | histidine kinase HHK6                         |
| 62765 |   |   |   |   |   |   |               |               | unknown protein with NUDIX domain (hydrolase) |
| 62769 | + | + | + | + | + | + |               |               | DPH2. required for diphthamide synthesis.     |
| 62780 | + | + | + |   |   |   |               |               | SAM methyltransferase. TRM12                  |
| 62787 | + | + | + | + | + | + |               |               | Zn2Cys6 transcriptional regulator             |
| 62789 | + | + | + | + | + | + |               |               | unknown protein                               |
| 62805 |   |   |   |   |   |   | 1.427 up      | 2.758<br>down | C2H2 transcriptional regulator                |
| 62809 | + | + | + | + | + | + |               |               | Unknown protein with WD40 repeats             |
| 62820 | + | + | + | + | + | + |               |               | Ribosomal protein(60S) L152/L15B              |
| 62821 | + | + | + | + | + | + |               |               | unknown protein                               |
| 62826 |   |   |   |   |   |   |               |               | unknown protein                               |
| 62835 | + | + | + | + | + | + |               |               | Calcium transporter                           |
| 62836 | + | + | + | + | + | + | 1.377<br>down | 2.777<br>down | unknown protein                               |
| 62871 |   |   |   |   |   |   |               |               | unknown protein                               |
| 62872 |   |   |   |   |   |   | 2.024 up      | 9.608<br>down | unknown protein GPR1/FUN34/yaaH-like          |
| 62880 | + | + | + | + | + | + |               |               | unknown protein                               |
| 62886 |   | + |   |   |   |   |               |               | unknown protein                               |
| 62912 | + | + | + | + | + | + | 1.810 up      | 2.580 up      | unknown protein. 1TM                          |

|       |   |   |   |   |   |   |               |               |                                                                                                  |
|-------|---|---|---|---|---|---|---------------|---------------|--------------------------------------------------------------------------------------------------|
| 62914 | + | + | + | + |   |   |               |               | Rpp14 family protein                                                                             |
| 62922 | + | + | + | + | + | + |               |               | unknown protein                                                                                  |
| 62929 | + | + | + | + | + | + |               |               | unknown protein                                                                                  |
| 62938 |   |   |   |   |   |   |               |               | unknown protein                                                                                  |
| 62962 | + | + | + | + | + | + |               |               | unknown protein                                                                                  |
| 62964 | + | + | + | + | + | + |               |               | transcriptional regulator HMG type                                                               |
| 62971 |   |   |   |   |   |   |               |               | MFS permease                                                                                     |
| 62975 | + | + | + | + | + | + |               |               | unknown protein                                                                                  |
| 62977 |   |   |   |   |   |   | 2.778<br>down | 3.175<br>down | nucleoside diphosphate sugar epimerase. secreted                                                 |
| 62979 |   |   |   |   |   |   |               |               | unknown protein                                                                                  |
| 62985 | + | + | + |   |   |   |               |               | lipase/esterase                                                                                  |
| 62986 | + | + | + | + | + | + |               |               | unknown protein                                                                                  |
| 63001 |   |   |   |   |   |   |               |               | pyridoxamine phosphate oxidase family protein                                                    |
| 63006 |   |   |   |   |   |   |               |               | inositol monophosphatase                                                                         |
| 63007 | + | + | + |   |   |   | 1.582<br>down | 3.793<br>down | meiotic chromosome segregation protein. putative                                                 |
| 63011 | + | + | + |   |   |   |               |               | unknown protein                                                                                  |
| 63038 | + | + | + | + | + | + |               |               | Rpc82. DNA-directed RNA polymerase III subunit; In <i>S. cerevisiae</i> . the enzyme is composed |
| 63047 | + | + | + |   |   |   |               |               | MMR; HR regulation                                                                               |
| 63053 | + | + | + | + | + | + |               |               | Secretion related small GTPase Rab2                                                              |
| 63088 | + | + | + |   |   |   |               |               | unknown protein                                                                                  |
| 63092 | + | + | + | + | + | + |               |               | ribitol kinase                                                                                   |
| 63093 | + | + | + |   |   |   |               |               | unknown protein                                                                                  |
| 63102 | + | + | + | + | + | + |               |               | ARP2/3 complex. 21 kDa p21-Arc subunit                                                           |
| 63104 |   |   |   |   |   |   |               |               | unknown protein                                                                                  |
| 63107 |   |   |   |   |   |   |               |               | unknown protein                                                                                  |
| 63125 |   |   | + |   | + |   |               |               | unknown protein                                                                                  |
| 63145 | + | + | + | + | + | + |               |               | MFS permease                                                                                     |
| 63151 |   |   |   |   |   |   |               |               | unknown protein                                                                                  |



|       |   |   |   |   |   |   |               |               |                                                              |
|-------|---|---|---|---|---|---|---------------|---------------|--------------------------------------------------------------|
| 63152 |   |   |   |   |   |   | 1.122<br>down | 2.397<br>down | Cut9 interacting protein Scn1. putative                      |
| 63156 | + | + | + | + | + | + |               |               | unknown protein                                              |
| 63157 |   | + |   |   |   | + |               |               | unknown protein                                              |
| 63159 | + | + | + | + | + | + |               |               | straitin Pro11 (stalk rot protein)                           |
| 63163 |   |   |   |   |   |   | 1.015 up      | 2.105<br>down | unknown protein                                              |
| 63173 | + | + | + | + | + | + |               |               | unknown protein with YIP1 domain                             |
| 63180 | + | + | + | + | + | + |               |               | acetylnithine aminotransferase-like protein                  |
| 63200 |   |   |   |   |   |   |               |               | ku70                                                         |
| 63202 |   |   |   |   |   |   | 1.213<br>down | 4.578<br>down | alpha/beta hydrolase.                                        |
| 63204 |   |   |   |   |   |   | 1.214<br>down | 2.179<br>down | flavodoxin domain containing protein                         |
| 63206 | + | + | + | + | + | + |               |               | ZIP Zinc transporter                                         |
| 63217 | + | + | + |   | + |   |               |               | unknown protein                                              |
| 63240 |   |   |   |   |   |   |               |               | HET-E-1. putative                                            |
| 63257 |   |   |   |   |   |   |               |               | unknown protein                                              |
| 63269 | + | + | + | + | + | + |               |               | mitochondrial ribosomal protein MRPL3.                       |
| 63272 | + | + | + | + | + | + |               |               | NifU-like protein                                            |
| 63277 |   | + |   |   |   |   |               |               | unknown protein                                              |
| 63290 |   |   |   |   |   |   |               |               | unknown protein                                              |
| 63293 | + | + | + | + | + | + |               |               | unknown protein                                              |
| 63328 | + | + |   |   |   |   |               |               | unknown protein                                              |
| 63341 | + | + | + |   |   |   |               |               | Phosphatidylinositol:UDP-GlcNAc a-GlcNAc-transferase (Pig-A) |
| 63347 | + | + | + | + | + | + |               |               | Phosphatidylinositol-4-kinase stt4                           |
| 63352 | + | + | + | + | + | + |               |               | unknown protein                                              |
| 63354 | + | + | + | + | + | + |               |               | phosphoadenosine phosphosulfate reductase                    |
| 63364 |   |   |   |   |   |   |               |               | unknown protein                                              |
| 63378 |   |   |   |   |   |   |               |               | unknown protein                                              |
| 63379 | + | + | + | + | + | + | 2.029 up      | 2.439 up      | RNA polymerase II transcriptional coactivator. putative      |

|       |   |   |   |   |   |   |            |            |                                                       |
|-------|---|---|---|---|---|---|------------|------------|-------------------------------------------------------|
| 63381 |   |   |   |   |   |   |            |            | unknown protein                                       |
| 63382 | + | + | + | + | + | + |            |            | unknown protein                                       |
| 63395 |   |   |   |   |   |   | 1.427 up   | 2.347 down | Glycerophosphoryl diester phosphodiesterase           |
| 63397 | + | + | + |   | + | + |            |            | unknown protein                                       |
| 63398 | + | + |   |   |   |   |            |            | Peptidase M48. Ste24p                                 |
| 63400 |   |   |   |   |   |   | 1.303 down | 2.106 down | mitochondrial exoribonuclease Cyt-4                   |
| 63413 |   |   | + |   |   |   |            |            | unknown protein. only in ascomycota                   |
| 63416 |   |   |   |   |   |   |            |            | unknown protein                                       |
| 63419 |   |   |   |   |   |   |            |            | Met-10+ like-protein                                  |
| 63435 |   |   |   |   |   |   |            |            | unknown protein                                       |
| 63441 | + | + | + | + | + | + |            |            | mitochondrial precursor proteins import receptor      |
| 63442 | + | + | + | + | + | + |            |            | SWR1-complex protein 4. putative                      |
| 63454 | + | + | + | + | + | + |            |            | DNA replication licensing factor mcm2                 |
| 63464 |   | + | + |   |   |   |            |            | unknown protein                                       |
| 63465 | + | + | + | + | + | + |            |            | unknown protein                                       |
| 63484 | + | + |   |   |   |   |            |            | chromodomain-helicase-DNA-binding protein             |
| 63503 |   |   |   |   |   |   | 1.398 up   | 2.238 up   | rrbosomal protein S2 and tRNA/rRNA methyltransferase. |
| 63507 | + | + | + | + | + | + |            |            | Di-trans.poly-cis-decaprenylcistransferase. putative  |
| 63511 | + | + | + | + | + | + |            |            | unknown protein                                       |
| 63526 |   |   |   |   |   |   | 2.301 up   | 6.318 up   | SSCRP                                                 |
| 63532 | + | + | + | + | + | + |            |            | Zn2Cys6 transcriptional regulator                     |
| 63542 | + | + | + | + | + | + |            |            | unknown protein                                       |
| 63547 | + | + | + | + | + | + |            |            | DNA-directed RNA polymerase II subunit RPB7           |
| 63558 | + | + | + |   |   |   |            |            | unknown protein                                       |
| 63568 |   |   |   |   |   |   |            |            | SNF2-like helicase. ATPase domain                     |
| 63620 | + | + | + | + | + | + |            |            | unknown protein                                       |
| 63624 | + | + | + | + | + | + |            |            | splicing factor 3A subunit 2                          |
| 63632 | + | + | + | + | + | + |            |            | unknown protein                                       |

|       |  |  |   |   |   |   |   |               |               |                                                                                           |
|-------|--|--|---|---|---|---|---|---------------|---------------|-------------------------------------------------------------------------------------------|
| 63648 |  |  | + |   |   |   |   |               |               | unknown protein                                                                           |
| 63653 |  |  |   |   |   |   |   | 9.788 up      | 5.352 up      | ankyrin                                                                                   |
| 63657 |  |  |   |   |   |   |   |               |               | unknown protein                                                                           |
| 63678 |  |  | + | + | + | + | + |               |               | unknown protein                                                                           |
| 63687 |  |  |   |   |   |   |   | 4.207<br>down | 2.154<br>down | ankyrin                                                                                   |
| 63692 |  |  |   |   |   |   |   | 1.343<br>down | 2.729<br>down | dipeptidyl peptidase 5                                                                    |
| 63702 |  |  | + | + | + | + | + | 1.342<br>down | 2.367<br>down | unknown protein                                                                           |
| 63703 |  |  |   |   |   |   |   |               |               | molybdopterin synthase small subunit CnxG. putative                                       |
| 63709 |  |  | + | + | + | + | + |               |               | cystathionine beta-synthase (beta-thionase). putative                                     |
| 63710 |  |  |   |   |   |   |   | 1.246<br>down | 2.107 up      | MMR; HR regulation                                                                        |
| 63717 |  |  | + | + | + | + | + |               |               | unknown protein                                                                           |
| 63727 |  |  |   |   |   |   |   | 1.004<br>down | 2.219<br>down | Acyl-CoA dehydrogenase. central region                                                    |
| 63733 |  |  |   |   |   |   |   |               |               | unknown protein                                                                           |
| 63742 |  |  | + | + | + | + | + |               |               | Demethoxyubiquinone hydroxylase                                                           |
| 63744 |  |  | + | + | + | + | + |               |               | unknown protein                                                                           |
| 63746 |  |  | + | + | + | + | + |               |               | unknown protein                                                                           |
| 63747 |  |  | + | + | + | + | + |               |               | unknown protein with PWWP domain                                                          |
| 63751 |  |  | + | + | + | + | + |               |               | 19S regulatory particle ATPase Rpt4                                                       |
| 63754 |  |  | + | + | + | + | + |               |               | t-SNARE. SSO1                                                                             |
| 63756 |  |  |   |   |   |   |   | 2.781<br>down | 2.539<br>down | helicase. DEAD-box superfamily                                                            |
| 63772 |  |  | + | + | + | + | + |               |               | chromatin structure-remodeling complex protein. putative                                  |
| 63774 |  |  | + | + | + | + | + |               |               | GTPase. related to <i>S. cerevisiae</i> NuclearGTP-binding protein NUG1 (NuclearGTPase 1) |
| 63780 |  |  | + | + | + | + | + |               |               | mitochondrial inner import translocase TIM54                                              |
| 63813 |  |  | + | + | + | + | + |               |               | cytochrome b5. putative                                                                   |
| 63815 |  |  | + | + | + | + | + | 1.051 up      | 4.989 up      | Membrane coat complex Retromer. subunit Vps26                                             |

|       |  |  |   |   |   |   |               |               |  |                                                          |
|-------|--|--|---|---|---|---|---------------|---------------|--|----------------------------------------------------------|
| 63828 |  |  | + |   |   |   |               |               |  | GT $\alpha$ -1.6-mannosyltransferase                     |
| 63837 |  |  |   |   |   |   | 1.072<br>down | 2.580<br>down |  | unknown protein                                          |
| 63868 |  |  |   |   |   |   | 2.728<br>down | 2.899<br>down |  | unknown protein                                          |
| 63869 |  |  | + | + |   |   |               |               |  | unknown protein                                          |
| 63881 |  |  | + |   |   |   | 2.236 up      | 2.218 up      |  | unknown protein                                          |
| 63882 |  |  | + | + | + | + |               |               |  | enoyl-CoA hydratase                                      |
| 63889 |  |  | + | + | + |   |               |               |  | Adenosine deaminase-related growth factors               |
| 63899 |  |  | + | + | + | + | 1.554 up      | 4.639 up      |  | unknown protein                                          |
| 63909 |  |  |   |   |   |   |               |               |  | unknown protein                                          |
| 63913 |  |  |   |   |   |   |               |               |  | unknown protein                                          |
| 63914 |  |  | + | + | + | + | 1.761<br>down | 3.150<br>down |  | integral membrane protein. putative                      |
| 63919 |  |  | + | + | + | + | 2.195 up      | 2.727 up      |  | Cys/Met metabolism PLP-dependent enzyme                  |
| 63935 |  |  | + | + | + | + |               |               |  | isoleucyl-tRNA synthetase. class Ia.                     |
| 63937 |  |  | + | + | + | + |               |               |  | mip1/kog1p. putative guanine nucleotide binding protein  |
| 63946 |  |  | + | + | + | + |               |               |  | GPI transamidase subunit PIG-U                           |
| 63952 |  |  | + | + | + | + |               |               |  | unknown protein                                          |
| 63955 |  |  | + | + | + |   |               |               |  | unknown protein                                          |
| 63966 |  |  |   |   |   |   | 1.027<br>down | 3.494 up      |  | high-affinity glucose transporter                        |
| 63967 |  |  |   |   |   |   |               |               |  | GPI-anchored wall transfer protein 1. putative           |
| 63972 |  |  |   |   |   |   |               |               |  | cytochrome c oxidase assembly protein (Pet117). putative |
| 63978 |  |  |   |   |   |   | 1.133<br>down | 2.490<br>down |  | Zn2Cys6 transcriptional regulator                        |
| 63981 |  |  |   |   |   |   |               |               |  | GPCR . contains RGS domain                               |
| 64000 |  |  | + | + | + | + |               |               |  | unknown protein                                          |
| 64009 |  |  | + | + | + | + |               |               |  | importin $\beta$ KapH                                    |
| 64010 |  |  | + | + | + |   |               |               |  | unknown protein                                          |
| 64011 |  |  | + | + | + | + |               |               |  | unknown protein                                          |

|       |   |   |   |   |   |   |            |            |                                                            |
|-------|---|---|---|---|---|---|------------|------------|------------------------------------------------------------|
| 64018 |   | + |   |   |   |   | 1.107 up   | 3.214 down | GPCR. mating type pheromone G-protein coupled receptor     |
| 64023 | + | + | + | + | + | + |            |            | ERAD-associated E3 ubiquitin-protein ligase component HRD3 |
| 64029 |   |   |   |   |   |   | 1.233 down | 2.447 down | folylpolyglutamate synthase . putative                     |
| 64044 |   |   | + |   |   |   |            |            | unknown protein                                            |
| 64049 |   |   |   |   |   |   | 1.064 down | 7.850 up   | unknown protein                                            |
| 64065 | + | + | + | + | + |   |            |            | tRNA(His) guanylyltransferase . putative                   |
| 64066 |   |   |   |   |   |   | 1.196 up   | 2.742 down | acyltransferase 3                                          |
| 64110 | + | + | + | + | + |   |            |            | unknown protein                                            |
| 64111 | + | + | + | + | + | + |            |            | structural maintenance of chromosomes 5 smc5               |
| 64112 | + | + | + | + | + | + |            |            | unknown protein                                            |
| 64117 | + | + | + | + | + | + |            |            | uracil-DNA glycosylase                                     |
| 64125 |   |   |   |   |   |   |            |            | Serine/threonine protein kinase                            |
| 64130 | + | + | + | + | + | + |            |            | unknown protein                                            |
| 64138 | + | + | + | + | + | + |            |            | SET1 complex component swd1                                |
| 64144 |   |   |   |   |   |   |            |            | cyclophilin type peptidyl-prolyl cis-trans isomerase/CLD   |
| 64167 |   | + |   |   |   |   |            |            | Sexual differentiation process protein ISP4                |
| 64172 |   |   |   |   |   |   | 1.590 up   | 2.704 up   | Glutathione-dependent formaldehyde-activating.GFA          |
| 64175 |   |   |   |   |   |   |            |            | transcriptional regulator HMG type                         |
| 64179 | + | + | + | + | + | + |            |            | unknown protein                                            |
| 64181 |   |   |   |   |   |   | 1.885 up   | 2.427 up   | SSCRP                                                      |
| 64193 | + | + | + | + | + | + |            |            | glutamate carbounknown proteinpeptidase                    |
| 64196 | + | + | + | + | + | + |            |            | serine/threonine protein kinase                            |
| 64212 | + | + | + | + | + | + |            |            | unknown protein                                            |
| 64249 |   | + |   |   |   |   |            |            | septum formation protein Maf                               |
| 64261 | + | + | + | + | + | + |            |            | subtilisin like protease                                   |
| 64271 | + | + | + | + | + | + |            |            | unknown protein                                            |
| 64272 | + | + | + | + | + | + |            |            | unknown protein                                            |

|       |   |   |   |   |   |   |               |               |                                                                                        |
|-------|---|---|---|---|---|---|---------------|---------------|----------------------------------------------------------------------------------------|
| 64274 |   |   |   |   |   |   |               |               | unknown protein                                                                        |
| 64285 | + | + | + | + | + | + |               |               | GH47 $\alpha$ -mannosidase                                                             |
| 64288 |   |   |   |   |   |   | 1.188<br>down | 2.399 up      | unknown protein                                                                        |
| 64295 |   |   |   |   |   |   | 1.242<br>down | 2.735<br>down | nitrogen permease regulator Npr2. putative                                             |
| 64298 | + | + | + | + | + | + |               |               | kinesin-like protein                                                                   |
| 64300 | + | + | + | + | + | + |               |               | cell polarity protein (Tea1)                                                           |
| 64308 | + | + |   |   |   |   |               |               | unknown protein                                                                        |
| 64312 |   |   |   |   |   |   | 1.953<br>down | 4.165<br>down | unknown protein. only present in fungi                                                 |
| 64314 |   |   |   |   |   |   |               |               | MFS permease                                                                           |
| 64318 | + | + | + | + | + | + | 1.295 up      | 2.086 up      | unknown protein                                                                        |
| 64322 |   |   |   |   |   |   |               |               | unknown protein                                                                        |
| 64327 | + | + | + | + | + | + |               |               | threonyl-tRNA synthetase. class IIa.                                                   |
| 64330 |   |   |   |   |   |   |               |               | indoleamine 2,3-dioxygenase                                                            |
| 64332 | + | + | + | + | + | + |               |               | TRAPP complex component Bet3                                                           |
| 64345 | + | + | + | + | + | + |               |               | 3-Methylcrotonyl-CoA carboxylase. non-biotin containing subunit/Acetyl-CoA carboxylase |
| 64347 | + | + | + | + | + | + |               |               | unknown protein                                                                        |
| 64358 |   |   |   |   |   |   |               |               | unknown protein                                                                        |
| 64370 |   |   |   |   |   |   | 2.259<br>down | 8.211<br>down | calpain-like protease                                                                  |
| 64372 |   |   | + |   |   |   |               |               | unknown protein                                                                        |
| 64375 | + | + | + | + | + | + |               |               | GH5 glucan $\beta$ -1,3-glucosidase                                                    |
| 64377 |   |   |   |   |   |   |               |               | Cytochrome P only                                                                      |
| 64385 |   |   |   |   |   |   |               |               | Riboflavin kinase / FAD synthetase                                                     |
| 64392 | + | + | + | + | + | + |               |               | unknown protein with Kelch domain                                                      |
| 64397 |   |   |   |   |   |   |               |               | Ceramidase family protein. associated toCellulase signal transduction (PMID: 15288024) |
| 64420 | + | + | + | + | + | + |               |               | unknown protein                                                                        |
| 64421 | + | + | + | + | + | + |               |               | unknown protein                                                                        |
| 64437 | + | + | + | + | + | + |               |               | BRCT domain-containing protein                                                         |

|       |   |   |   |   |   |   |            |            |                                                                                             |
|-------|---|---|---|---|---|---|------------|------------|---------------------------------------------------------------------------------------------|
| 64448 | + | + | + |   |   |   | 1.720 up   | 2.858 up   | unknown protein                                                                             |
| 64469 |   |   |   |   |   |   | 1.902 down | 2.170 down | Hydrolases of alpha/beta hydrolase superfamily                                              |
| 64485 |   |   |   |   |   |   |            |            | unknown protein                                                                             |
| 64498 | + | + | + | + | + | + |            |            | Xrs2. Interacts with Tel1. enhances Mre11 nuclease activity                                 |
| 64543 |   |   |   |   |   |   |            |            | GT50 GPI mannosyltransferase 1                                                              |
| 64545 |   |   |   |   |   |   | 2.286 down | 3.702 down | MFS permease                                                                                |
| 64561 | + | + | + | + | + | + |            |            | cytochrome b5. putative                                                                     |
| 64600 | + | + | + | + | + | + |            |            | Oligosaccharyltransferase. delta subunit                                                    |
| 64601 | + | + | + |   |   |   |            |            | unknown protein                                                                             |
| 64608 | + | + | + | + | + | + |            |            | Regulatory protein involved in catabolite repression. part of a complex with creB that regu |
| 64617 |   |   |   |   |   |   |            |            | Guanine nucleotide-binding protein beta subunit-like protein. contains WD40-repeats         |
| 64620 |   |   |   |   |   |   | 1.383 down | 2.236 down | Alpha/beta hydrolase                                                                        |
| 64625 |   |   |   |   |   |   |            |            | unknown protein                                                                             |
| 64642 | + | + | + | + | + | + |            |            | Rad1/Rec1/Rad17 repair protein                                                              |
| 64644 | + | + | + | + | + | + |            |            | unknown protein                                                                             |
| 64654 | + | + | + | + | + | + |            |            | Vacuolar protein sorting-associated protein Vps8                                            |
| 64656 |   |   |   |   |   |   |            |            | unknown protein                                                                             |
| 64658 | + | + | + | + | + | + |            |            | Pex13 protein                                                                               |
| 64667 | + | + | + |   |   |   | 4.014 down | 3.283 down | unknown protein                                                                             |
| 64672 |   |   |   |   |   |   | 1.298 down | 4.986 down | Helix-turn-helix. AraC type                                                                 |
| 64676 |   | + |   |   |   |   | 3.856 up   | 2.420 up   | unknown protein                                                                             |
| 64680 | + | + | + | + | + | + |            |            | Histone acetyltransferase. catalytic subunit of the ADA and SAGA complexes                  |
| 64683 |   |   |   |   |   |   |            |            | FAD-binding domain                                                                          |
| 64684 | + | + | + | + | + | + |            |            | chromatin assembly factor 1 subunit B. putative                                             |
| 64685 | + | + | + | + | + | + |            |            | mitochondrial hypoxia responsive domain-containing protein                                  |
| 64696 | + | + | + | + | + | + |            |            | unknown protein                                                                             |

|       |   |   |   |  |  |  |          |       |                                                                                     |
|-------|---|---|---|--|--|--|----------|-------|-------------------------------------------------------------------------------------|
| 64704 |   |   |   |  |  |  |          |       | glycerol:H <sup>+</sup> symporter (Gup1). putative                                  |
|       |   |   |   |  |  |  | 1.372    | 4.096 |                                                                                     |
| 64710 |   |   |   |  |  |  | down     | down  | AAA+-type ATPase                                                                    |
|       |   |   |   |  |  |  | 1.795    | 2.267 |                                                                                     |
| 64719 |   |   |   |  |  |  | down     | down  | Subtilisin like protease (SUB3)                                                     |
| 64720 |   |   |   |  |  |  |          |       | short chain dehydrogenase/reductase                                                 |
| 64752 |   |   |   |  |  |  |          |       | RNA polymerase N/8 kDa subunit                                                      |
| 64757 |   |   |   |  |  |  |          |       | unknown protein                                                                     |
| 64758 |   |   |   |  |  |  |          |       | MFS permease                                                                        |
| 64777 |   |   |   |  |  |  |          |       | unknown protein                                                                     |
| 64778 |   |   |   |  |  |  |          |       | unknown protein                                                                     |
| 64784 |   |   |   |  |  |  |          |       | Zn2Cys6 transcriptional regulator                                                   |
| 64790 |   |   |   |  |  |  |          |       | Acetate transporter required for normal sporulation; phosphorylated in mitochondria |
| 64794 |   |   |   |  |  |  |          |       | unknown protein                                                                     |
| 64818 |   |   |   |  |  |  |          |       | Mitochondrial substrate carrier                                                     |
| 64820 |   |   |   |  |  |  |          |       | unknown protein with WD repeats                                                     |
|       |   |   |   |  |  |  | 1.302    | 3.227 |                                                                                     |
| 64827 |   |   |   |  |  |  | down     | down  | GH36 raffinose synthase domain protein                                              |
| 64832 |   |   |   |  |  |  |          |       | G/T mismatch-specific thymine DNA glycosylase                                       |
|       |   |   |   |  |  |  | 1.158    | 2.680 |                                                                                     |
| 64834 |   |   |   |  |  |  | down     | down  | unknown protein                                                                     |
| 64836 |   |   |   |  |  |  |          |       | unknown protein                                                                     |
| 64866 |   |   |   |  |  |  |          |       | DSBA-like thioredoxin domain-containing protein                                     |
| 64869 |   |   |   |  |  |  |          |       | Cytochrome P450 CYP4/CYP19/CYP26 subfamilies                                        |
|       |   |   |   |  |  |  |          | 2.365 |                                                                                     |
| 64874 |   |   |   |  |  |  | 1.271 up | down  | MFS toxin efflux pump                                                               |
|       |   |   |   |  |  |  | 3.852    | 3.417 |                                                                                     |
| 64882 |   |   |   |  |  |  | down     | down  | MFS permease                                                                        |
| 64898 | + |   |   |  |  |  |          |       | unknown protein                                                                     |
| 64900 |   | + |   |  |  |  |          |       | Cytochrome P450 CYP2 subfamily                                                      |
| 64906 |   |   | + |  |  |  |          |       | GH5 endo- $\beta$ -1.6-glucanase                                                    |



|       |   |   |   |   |   |   |             |            |                                                                         |
|-------|---|---|---|---|---|---|-------------|------------|-------------------------------------------------------------------------|
| 64916 | + | + | + | + |   |   | 1.689 up    | 2.720 down | unknown protein                                                         |
| 64919 |   |   |   |   |   |   | 1.410 up    | 3.266 up   | MFS permease                                                            |
| 64920 |   |   |   |   |   |   |             |            | Monocarboxylate transporter                                             |
| 64922 |   |   |   |   |   |   |             |            | unknown protein. only present in Gibberella. Neurospora and Magnaporthe |
| 64925 | + | + | + | + | + |   | 2.051 up    | 2.320 up   | GT32 a-glycosyltransferase                                              |
| 64937 |   |   |   |   |   |   | 1.045 up    | 2.616 up   | unknown protein                                                         |
| 64938 |   |   |   |   |   |   |             |            | dual specificity phosphatase                                            |
| 64951 |   |   |   |   |   |   | 1.147 down  | 3.583 up   | unknown protein                                                         |
| 64956 |   |   |   |   |   |   | 1.370 up    | 3.208 up   | unknown protein                                                         |
| 64959 | + | + |   | + | + |   | 13.328 down | 2.437 down | phosphatidyl synthase                                                   |
| 64963 | + | + | + |   |   |   |             |            | unknown protein                                                         |
| 64971 |   |   |   |   |   |   | 2.033 down  | 2.559 down | Amino acid permeases                                                    |
| 64972 |   |   |   |   |   |   |             |            | unknown protein                                                         |
| 64989 | + | + | + | + | + | + |             |            | unknown protein                                                         |
| 64996 |   |   |   |   |   |   | 6.698 up    | 5.718 up   | nitrilase                                                               |
| 65004 |   |   |   |   |   |   |             |            | unknown protein                                                         |
| 65012 | + |   |   |   |   |   |             |            | unknown protein                                                         |
| 65018 | + | + | + | + | + | + |             |            | unknown protein                                                         |
| 65021 |   |   |   |   |   |   | 1.331 up    | 3.039 up   | short chain dehydrogenase/reductase                                     |
| 65029 |   |   |   |   |   |   | 1.263 down  | 2.182 down | 2OG-Fe(II) oxygenase superfamily protein                                |
| 65033 | + | + | + | + | + | + |             |            | unknown protein. secreted                                               |
| 65036 |   |   |   |   |   |   |             |            | cytochrome P450 monooxygenase                                           |
| 65037 |   |   |   |   |   |   | 1.602 down  | 2.345 up   | pyrophosphatase                                                         |
| 65039 |   |   |   |   |   |   |             |            | sexual development protein                                              |

|       |  |   |   |   |   |   |               |               |                                                                                           |
|-------|--|---|---|---|---|---|---------------|---------------|-------------------------------------------------------------------------------------------|
| 65040 |  |   |   |   |   |   | 1.088<br>down | 2.634 up      | cytochrome P450. putative                                                                 |
| 65041 |  |   |   |   |   |   |               |               | SAM-dependent methyltransferase                                                           |
| 65046 |  | + | + |   |   |   |               |               | unknown protein                                                                           |
| 65055 |  |   | + |   |   |   |               |               | fatty acid desaturase                                                                     |
| 65060 |  | + | + | + | + | + |               |               | unknown protein                                                                           |
| 65067 |  |   |   |   |   |   | 1.860<br>down | 3.403 up      | short chain dehydrogenase/reductase                                                       |
| 65070 |  |   |   |   |   |   |               |               | Zn2Cys6 transcriptional regulator                                                         |
| 65085 |  |   |   |   |   |   |               |               | MFS permease                                                                              |
| 65095 |  |   |   |   |   |   | 1.135 up      | 2.378 up      | unknown protein                                                                           |
| 65096 |  |   |   |   |   |   | 1.360 up      | 2.422 up      | 3'-tRNA processing endoribonuclease                                                       |
| 65097 |  |   |   |   |   |   |               |               | Zinc-binding oxidoreductase                                                               |
| 65098 |  |   |   |   |   |   | 1.379 up      | 4.278 up      | FAD-binding domain and SignalP-predicted secretion signal. Distantly related to tre36816. |
| 65102 |  |   |   |   |   |   | 1.007 up      | 2.577 up      | unknown protein                                                                           |
| 65104 |  | + | + | + | + | + |               |               | Vacuolar protein sorting-associated protein Vps13                                         |
| 65106 |  |   |   |   |   |   | 1.083 up      | 27.491 up     | CN_hydrolase                                                                              |
| 65107 |  | + | + | + | + | + | 1.357<br>down | 2.374<br>down | cytochrome P450                                                                           |
| 65114 |  |   |   |   |   |   |               |               | MFS permease                                                                              |
| 65116 |  |   |   |   |   |   | 1.187 up      | 2.497 up      | PKS                                                                                       |
| 65117 |  |   |   |   |   |   | 2.782<br>down | 2.425<br>down | ankyrin                                                                                   |
| 65128 |  | + | + | + | + | + |               |               | polynucleotide kinase 3 phosphatase                                                       |
| 65133 |  |   |   |   |   |   | 1.370 up      | 2.840<br>down | Zn2Cys6 transcriptional regulator                                                         |
| 65137 |  |   |   |   |   |   |               |               | GH64 endo-1.3-β-glucanase                                                                 |
| 65141 |  |   |   |   |   |   | 1.022 up      | 2.394 up      | cytochrome P450 monooxygenase                                                             |
| 65142 |  |   |   |   |   |   | 1.800 up      | 2.379 up      | aldehyde dehydrogenase ALDH                                                               |
| 65147 |  |   |   |   |   |   |               |               | unknown protein                                                                           |

|       |   |   |   |   |   |   |            |            |                                                                                               |
|-------|---|---|---|---|---|---|------------|------------|-----------------------------------------------------------------------------------------------|
| 65153 |   |   |   |   |   |   | 1.019 up   | 2.030 down | MFS permease                                                                                  |
| 65156 |   |   | + |   |   |   | 1.887 up   | 2.672 up   | S1/P1 nuclease                                                                                |
| 65162 |   |   | + |   |   |   | 3.710 up   | 5.381 up   | GH18 endo-N-acetyl-β-D-glucosaminidase Endo T                                                 |
| 65164 | + | + | + |   |   |   | 1.711 down | 2.468 down | unknown protein                                                                               |
| 65171 |   |   |   |   |   |   |            |            | unknown protein                                                                               |
| 65172 |   |   |   |   |   |   | 1.018 up   | 2.221 up   | PKS                                                                                           |
| 65179 |   |   |   |   |   |   |            |            | adenylosuccinate lyase                                                                        |
| 65190 |   |   |   |   |   |   |            |            | nitrilase                                                                                     |
| 65191 |   |   |   |   |   |   |            |            | MFS permease (maltose permease)                                                               |
| 65198 |   |   |   |   |   |   |            |            | BioA Adenosylmethionine--amino--oxononanoate aminotransferase                                 |
| 65200 | + | + | + | + | + | + |            |            | Vacuolar protein sorting-associated protein Vsp60                                             |
| 65209 | + | + | + | + | + | + |            |            | unknown protein                                                                               |
| 65214 | + | + | + | + | + | + |            |            | unknown protein                                                                               |
| 65215 |   |   |   |   |   |   |            |            | CE4 imidase                                                                                   |
| 65223 |   |   |   |   |   |   | 1.609 up   | 2.156 down | unknown protein                                                                               |
| 65225 | + | + | + | + | + | + |            |            | Encodes a possible homologue of the <i>S. cerevisiae</i> UTP7 gene. encoding a component of t |
| 65229 |   |   |   |   |   |   | 3.163 up   | 2.411 up   | unknown protein                                                                               |
| 65232 |   |   |   |   |   |   | 1.132 up   | 3.068 down | short chain dehydrogenase/reductase                                                           |
| 65242 | + | + | + | + | + | + |            |            | adaptin N-terminal region. Homologue of yeast GCN1 which encodes a translational activa       |
| 65275 |   |   |   |   |   |   |            |            | Glucose/sorbose dehydrogenases                                                                |
| 65286 |   |   |   |   |   |   | 1.227 up   | 2.536 down | unknown protein                                                                               |
| 65290 | + | + | + | + | + | + |            |            | CPC1. cross-pathway control protein 1                                                         |
| 65292 | + | + | + | + | + | + |            |            | AMP-dependent synthetase and ligase                                                           |
| 65295 | + | + | + | + | + | + |            |            | Serine hydroxymethyltransferase                                                               |
| 65313 | + | + | + | + | + | + |            |            | Chromosome segregation protein                                                                |

|       |   |   |   |   |   |   |                |                |                                                                                |
|-------|---|---|---|---|---|---|----------------|----------------|--------------------------------------------------------------------------------|
| 65315 | + |   | + |   |   |   | 16.360<br>down | 11.572<br>down | bZIP transcription factor                                                      |
| 65324 | + | + | + | + | + | + | 1.609 up       | 5.921 up       | metacaspase CasA                                                               |
| 65333 |   |   |   |   |   |   | 2.438<br>down  | 4.942<br>down  | GH15 alpha-glycosidase (Glucoamylase and related glycosyl hydrolases)          |
| 65360 |   |   |   |   |   |   |                |                |                                                                                |
| 65380 |   |   |   |   |   |   | 2.788 up       | 2.669 up       | GH47 $\alpha$ -1.2-mannosidase                                                 |
| 65402 | + | + | + | + | + | + |                |                | unknown protein                                                                |
| 65406 |   |   | + | + |   |   |                |                | cell wall glucanosyltransferase                                                |
| 65410 | + | + | + | + | + | + |                |                | Phosphoadenosine phosphosulfate reductase                                      |
| 65411 | + | + | + | + | + | + |                |                | nicotinate-nucleotide diphosphorylase                                          |
| 65433 |   |   |   |   |   |   |                |                | D-arabinitol dehydrogenase ArbD                                                |
| 65437 | + | + | + | + | + | + |                |                | unknown protein                                                                |
| 65447 | + | + | + | + | + | + |                |                | unknown protein                                                                |
| 65452 | + | + | + | + | + | + |                |                | SerB Phosphoserine phosphatase                                                 |
| 65480 | + | + | + | + | + | + |                |                | unknown protein                                                                |
| 65483 |   |   |   |   |   |   |                |                | unknown protein                                                                |
| 65490 |   |   |   |   |   |   |                |                | SpermidineSynthase                                                             |
| 65493 |   |   |   |   |   |   |                |                | MFS permease                                                                   |
| 65494 |   |   |   |   |   |   | 3.957 up       | 2.590 up       | metallopeptidase                                                               |
| 65496 | + | + | + | + |   | + |                |                | short chain dehydrognease/reductase                                            |
| 65499 |   |   |   |   |   |   | 1.096<br>down  | 2.838 up       | Tyrosine specific protein phosphatase and dual specificity protein phosphatase |
| 65508 | + | + | + | + | + | + | 1.109<br>down  | 2.452<br>down  | fructose-bisphosphatase                                                        |
| 65522 | + |   | + |   |   |   | 10.051<br>down | 4.155<br>down  | unknown protein                                                                |
| 65530 | + | + | + | + | + | + |                |                | GTP-binding (elongation factor Tu).                                            |
| 65533 |   |   | + |   |   |   |                |                | unknown protein                                                                |
| 65547 |   |   |   |   |   |   | 1.235 up       | 3.156<br>down  | mandelate racemase/muconate lactonase-like protein                             |

|       |   |   |   |   |   |   |   |   |               |               |                                                          |
|-------|---|---|---|---|---|---|---|---|---------------|---------------|----------------------------------------------------------|
| 65553 |   |   | + | + | + | + | + | + |               |               | ubiquitin-conjugating enzyme                             |
| 65555 |   |   | + | + | + |   |   |   |               |               | unknown protein                                          |
| 65559 |   |   | + | + | + | + | + | + |               |               | Respiratory-chain NADH dehydrogenase. 51 kDa subunit     |
| 65572 |   |   |   |   |   |   |   |   | 1.131<br>down | 2.638<br>down | unknown protein                                          |
| 65583 |   |   |   |   |   |   |   |   |               |               | MFS permease                                             |
| 65588 |   |   |   |   |   |   |   |   |               |               | short chain dehydrognease/reductase                      |
| 65591 |   |   | + | + | + | + | + | + |               |               | 26S proteasome regulatory complex subunit Rpn10          |
| 65595 | + | + | + | + | + |   |   |   |               |               | unknown protein                                          |
| 65603 |   |   | + | + | + | + | + | + | 1.730 up      | 2.704 up      | unknown protein                                          |
| 65607 |   |   | + | + | + | + | + | + | 1.071<br>down | 2.279<br>down | RgsC. regulator of G-protein signaling                   |
| 65615 |   |   | + | + | + | + | + | + |               |               | RibosomalRNA methyltransferaseRrmJ/FtsJ domain.          |
| 65623 |   |   | + | + | + | + | + | + |               |               | Sec61 gamma subunit                                      |
| 65625 |   |   | + | + | + | + | + | + |               |               | unknown protein                                          |
| 65640 |   |   | + | + | + | + | + | + | 1.692 up      | 3.499 up      | unknown protein                                          |
| 65646 |   |   | + | + | + | + | + | + |               |               | GT $\alpha$ -1.6-mannosyltransferase                     |
| 65659 |   |   | + | + | + | + | + | + |               |               | calcium binding EF-hand protein                          |
| 65671 |   |   | + | + | + | + | + | + |               |               | unknown protein                                          |
| 65672 |   |   |   | + |   | + |   | + |               |               | ubiquitin-protein ligase molybdopterin-converting factor |
| 65677 |   |   |   | + |   |   |   |   |               |               | Esterase/lipase/thioesterase                             |
| 65685 | + | + |   |   |   |   |   |   |               |               | histidinol phosphatase                                   |
| 65695 |   |   | + | + | + |   |   |   |               |               | unknown protein                                          |
| 65705 |   |   |   | + |   |   |   |   |               |               | unknown protein                                          |
| 65711 |   |   |   |   | + |   |   |   | 1.504 up      | 2.757 up      | SAM-dependent methyltransferase                          |
| 65717 |   |   | + | + | + | + | + | + |               |               | NADH-ubiquinone oxidoreductase 10.5 kDa subunit          |
| 65718 |   |   | + | + | + | + | + | + | 2.383<br>down | 2.523<br>down | unknown protein                                          |
| 65735 |   |   |   |   |   |   |   |   |               |               | unknown protein                                          |
| 65736 |   |   |   |   |   |   |   |   | 2.122 up      | 4.485 up      | catabolic 3-dehydroquinase                               |

|       |   |   |   |   |   |   |               |               |                                                                  |
|-------|---|---|---|---|---|---|---------------|---------------|------------------------------------------------------------------|
| 65739 |   |   |   |   |   |   | 1.548<br>down | 4.721<br>down | unknown protein                                                  |
| 65741 |   |   | + |   |   |   |               |               | tryptophanyl-tRNA synthetase                                     |
| 65743 |   |   |   |   |   |   |               |               | unknown protein                                                  |
| 65744 |   |   |   |   |   |   |               |               | MFS permease                                                     |
| 65746 |   |   | + |   |   |   | 1.162<br>down | 2.609<br>down | Zn2Cys6 transcriptional regulator                                |
| 65750 | + | + | + | + | + | + |               |               | RNA-binding. negative regulator of differentiation 1             |
| 65760 |   |   |   |   |   |   |               |               | unknown protein                                                  |
| 65768 | + | + | + | + | + | + | 1.275 up      | 2.053<br>down | unknown protein                                                  |
| 65771 |   |   |   |   |   |   | 1.125 up      | 6.530 up      | NACHT domain WD40 repeat-containing protein. related to HET      |
| 65773 | + | + | + | + | + | + |               |               | unknown protein                                                  |
| 65774 | + | + | + | + | + | + |               |               | unknown protein                                                  |
| 65782 |   |   |   |   |   |   |               |               | lipase/esterase ( $\alpha/\beta$ fold)                           |
| 65808 | + | + | + | + | + | + |               |               | mitochondrial ribosomal protein MRPL31 ( <i>S. cerevisiae</i> ). |
| 65810 |   |   |   |   |   |   |               |               | unique protein                                                   |
| 65816 | + | + | + | + | + | + |               |               | unknown protein                                                  |
| 65817 | + | + | + | + |   |   | 5.911<br>down | 3.410<br>down | GT $\alpha$ -1.3-mannosyltransferase CMT1                        |
| 65819 |   |   |   |   |   |   | 1.477<br>down | 2.505<br>down | Molecular chaperone Hsp70 family                                 |
| 65821 | + | + | + | + | + | + | 1.160<br>down | 2.113<br>down | vacuolar targeting protein Atg18                                 |
| 65832 |   | + |   |   |   |   |               |               | Neurospora ro-7                                                  |
| 65854 |   |   |   |   |   |   |               |               | Zn2Cys6 transcriptional regulator                                |
| 65869 |   |   |   |   |   |   |               |               | Shikimate kinase                                                 |
| 65873 | + | + | + | + | + | + | 1.464<br>down | 2.278<br>down | protein kinase A. catalytic subunit                              |
| 65880 | + | + | + | + | + | + |               |               | voltage gated chloride channel                                   |
| 65882 |   |   |   |   |   |   | 1.350<br>down | 2.411<br>down | dihydrodipicolinate synthase . putative                          |

|       |   |   |   |   |   |   |               |               |                                                                                           |
|-------|---|---|---|---|---|---|---------------|---------------|-------------------------------------------------------------------------------------------|
| 65883 |   |   |   |   |   |   | 4.669<br>down | 4.131<br>down | D-isomer-specific 2-hydroxy acid dehydrogenase                                            |
| 65887 | + | + | + | + | + | + |               |               | helix-turn-helix domain-containing protein                                                |
| 65891 |   |   |   |   |   |   | 1.574<br>down | 2.603<br>down | PKS                                                                                       |
| 65895 | + | + | + | + | + | + |               |               | mediator of RNA polymerase II transcription subunit 31                                    |
| 65915 |   |   |   |   |   |   |               |               | MFS permease                                                                              |
| 65921 | + | + | + | + | + | + | 1.005<br>down | 3.414 up      | Acetyl/propionyl-CoA carboxylase alpha subunit                                            |
| 65925 |   |   |   |   |   |   | 1.289 up      | 2.282 up      | cytidine and deoxycytidylate deaminase zinc-binding region                                |
| 65926 | + | + | + | + | + | + |               |               | Mgs1. a DNA-dependent ATPase possibly involved in Okazaki fragment processing             |
| 65927 | + | + | + | + | + | + |               |               | unknown protein                                                                           |
| 65933 |   |   |   |   |   |   | 2.112 up      | 2.174 up      | Epl1/Sm1                                                                                  |
| 65945 | + | + | + | + | + | + |               |               | annexin ANXC4                                                                             |
| 65948 |   |   |   |   |   |   |               |               | pirin                                                                                     |
| 65949 |   |   |   |   |   |   | 7.410 up      | 2.214 up      | unknown protein                                                                           |
| 65950 |   |   |   |   |   |   | 1.188 up      | 2.931<br>down | unknown protein                                                                           |
| 65957 |   | + | + |   |   |   | 1.022<br>down | 2.086<br>down | unknown protein                                                                           |
| 65965 | + | + | + | + | + | + |               |               | unknown protein                                                                           |
| 65969 |   |   | + |   |   |   |               |               | aldolase. class II                                                                        |
| 65971 |   |   |   |   |   |   |               |               | unknown protein                                                                           |
| 65975 |   |   |   |   |   |   | 1.609<br>down | 2.796<br>down | unknown protein                                                                           |
| 65977 |   |   |   |   |   |   |               |               | unknown protein with WD repeats                                                           |
| 65982 | + | + | + | + | + | + |               |               | GTPase activating protein for RabGTPases (Ras superfamily of smallGTPases). related to S. |
| 65986 |   |   |   |   |   |   | 1.463<br>down | 2.718<br>down | GH27 $\alpha$ -galactosidase                                                              |
| 65992 |   |   |   | + | + | + |               |               | unknown protein                                                                           |
| 65996 | + | + | + | + | + | + |               |               | unknown protein                                                                           |

|       |   |   |   |   |   |   |   |   |            |            |                                                                                        |
|-------|---|---|---|---|---|---|---|---|------------|------------|----------------------------------------------------------------------------------------|
| 65997 |   |   | + | + | + | + | + | + | 1.751 up   | 3.188 up   | Cyclophilin type peptidyl-prolyl cis-trans isomerase                                   |
| 66012 |   |   | + | + | + | + | + | + |            |            | nuclear cap-binding protein complex, small subunit                                     |
| 66016 |   |   |   |   |   |   |   |   | 4.207 down | 3.062 down | dienelactone hydrolase                                                                 |
| 66023 |   |   |   | + |   |   |   |   | 1.028 down | 2.627 down | unknown protein                                                                        |
| 66034 |   |   |   |   |   |   |   |   | 1.104 down | 5.924 down | unknown protein                                                                        |
| 66041 |   |   | + | + | + |   |   | + |            |            | GH18 chitinase CHI18-18                                                                |
| 66047 |   |   |   |   |   |   |   |   |            |            | Zn2Cys6 transcriptional regulator                                                      |
| 66059 |   |   |   |   | + |   |   |   |            |            | unknown protein                                                                        |
| 66075 |   |   | + | + | + | + | + | + |            |            | unknown protein                                                                        |
| 66077 |   |   |   |   |   |   |   |   | 1.149 down | 3.847 up   | ooc1-related protein                                                                   |
| 66087 |   |   |   |   |   |   |   |   |            |            | integral membrane protein. Mpv17/PMP22 family, putative                                |
| 66091 |   |   | + | + | + | + | + | + |            |            | RNA polymerase II transcription factor, putative                                       |
| 66092 |   |   |   | + | + |   |   |   | 8.365 down | 2.706 down | unique protein                                                                         |
| 66103 |   |   |   |   |   |   |   |   | 1.891 up   | 2.429 up   | WbbJ Acetyltransferase (isoleucine patch superfamily)                                  |
| 66111 |   |   |   |   |   |   |   |   |            |            | MRP-type ABC transporter                                                               |
| 66117 |   |   |   |   |   |   |   |   |            |            | short chain dehydrogenase/reductase                                                    |
| 66128 |   |   | + | + | + |   |   |   |            |            | Mec1p/ATR family of phosphatidylinositol-3-kinase-like proteins involved in DNA damage |
| 66132 |   |   | + | + | + | + | + | + |            |            | AAA ATPase                                                                             |
| 66136 |   |   | + | + | + | + | + | + |            |            | bimA                                                                                   |
| 66141 |   |   | + | + | + | + | + | + |            |            | Vacuolar sorting protein Pep3/Vps18                                                    |
| 66154 |   |   | + | + | + | + | + | + |            |            | eukaryotic rRNA processing protein EBP2                                                |
| 66161 | + | + | + | + | + | + | + | + |            |            | unknown protein                                                                        |
| 66163 |   |   | + | + | + | + | + | + |            |            | unknown protein                                                                        |
| 66165 |   |   | + | + | + | + | + | + |            |            | unknown protein                                                                        |
| 66173 |   |   | + | + | + | + | + | + |            |            | unknown protein                                                                        |
| 66175 |   |   |   |   |   |   |   |   |            |            | short chain dehydrogenase/reductase                                                    |



|       |  |   |   |   |   |   |   |            |                                   |                                                                                      |
|-------|--|---|---|---|---|---|---|------------|-----------------------------------|--------------------------------------------------------------------------------------|
| 66183 |  |   |   |   |   |   |   |            | Peptidase_Serine carboxypeptidase |                                                                                      |
| 66210 |  |   |   |   |   |   |   | 1.461 up   | 2.221 up                          | unknown protein                                                                      |
| 66218 |  | + |   |   |   |   |   |            |                                   | unknown protein                                                                      |
| 66222 |  |   |   |   |   |   |   |            |                                   | unknown protein                                                                      |
| 66228 |  |   |   |   |   |   |   | 1.186 up   | 3.451 up                          | unknown protein                                                                      |
| 66232 |  | + | + | + | + | + | + |            |                                   | unknown protein                                                                      |
| 66256 |  |   |   |   |   |   |   |            |                                   | unknown protein                                                                      |
| 66261 |  |   |   | + |   |   |   |            |                                   | nucleoside phosphorylase                                                             |
| 66268 |  | + | + | + | + | + | + | 1.083 down | 2.323 down                        | unknown protein                                                                      |
| 66269 |  | + | + | + | + | + | + |            |                                   | unknown protein                                                                      |
| 66270 |  | + | + | + | + | + | + |            |                                   | Golgi membrane protein. coy1. with similarity to mammalian CASP                      |
| 66276 |  | + |   |   |   |   |   |            |                                   | unknown protein                                                                      |
| 66280 |  | + | + | + |   |   |   |            |                                   | unknown protein                                                                      |
| 66286 |  |   |   |   |   |   |   |            |                                   | unknown protein                                                                      |
| 66294 |  | + | + | + | + | + | + |            |                                   | ATP-NAD/AcoX kinase                                                                  |
| 66296 |  | + | + | + | + | + | + |            |                                   | eukaryotic and archaeal DNA primase                                                  |
| 66303 |  |   |   |   |   |   |   |            |                                   | unknown protein                                                                      |
| 66308 |  | + | + | + | + | + | + |            |                                   | Metalloproteinase. putative                                                          |
| 66311 |  |   |   |   |   |   |   |            |                                   | MFS permease                                                                         |
| 66324 |  |   |   |   |   |   |   |            |                                   | alpha/beta hydrolase                                                                 |
| 66329 |  |   |   |   |   |   |   |            |                                   | unknown protein                                                                      |
| 66345 |  |   |   |   |   |   |   | 1.222 down | 6.910 up                          | Mn superoxide dismutase                                                              |
| 66351 |  | + | + | + | + | + | + |            |                                   | unknown protein                                                                      |
| 66353 |  | + | + | + | + | + | + |            |                                   | unknown protein                                                                      |
| 66370 |  |   |   |   |   |   |   | 1.105 down | 4.544 up                          | unknown protein                                                                      |
| 66394 |  |   | + |   |   |   |   | 1.099 up   | 2.982 down                        | DNA polymerase family X member. Most closely related to DNA polymerase mu. an enzyme |
| 66405 |  |   |   |   |   |   |   |            |                                   | transcriptional regulator. unknown                                                   |

|       |  |   |   |   |   |   |   |                |                                                                                      |                                                         |
|-------|--|---|---|---|---|---|---|----------------|--------------------------------------------------------------------------------------|---------------------------------------------------------|
| 66421 |  | + |   |   |   |   |   |                | unknown protein                                                                      |                                                         |
| 66432 |  |   |   |   |   |   |   |                | microsomal glutathione S transferase.                                                |                                                         |
| 66433 |  |   | + |   |   |   |   |                | GCN5 N-acetyltransferase                                                             |                                                         |
| 66436 |  | + | + | + | + | + | + |                | Nop1. component of the SSU processome involved in processing of pre-18S rRNA         |                                                         |
| 66437 |  |   |   |   |   |   |   |                | unknown protein                                                                      |                                                         |
| 66438 |  | + | + | + | + | + | + |                | unknown protein                                                                      |                                                         |
| 66453 |  |   |   |   |   |   |   |                | cytochrome P450 monooxygenase                                                        |                                                         |
| 66469 |  |   |   |   |   |   |   |                | unknown protein                                                                      |                                                         |
| 66474 |  | + | + | + | + | + | + |                | unknown protein                                                                      |                                                         |
| 66480 |  | + | + | + | + | + | + |                | RheB GTPase.Ras small GTPase.Ras-type.Related to Aspergillus fumigatusRheb GTPaseRhb |                                                         |
| 66484 |  | + | + | + | + | + | + |                | Guanine nucleotide exchange factor. syt1                                             |                                                         |
| 66486 |  | + | + | + | + | + | + |                | kinesin-like motor protein Kar3p required for karyogamy                              |                                                         |
| 66510 |  |   |   |   |   |   |   | 1.090<br>down  | 2.723 up                                                                             | short chain dehydrognease/reductase                     |
| 66517 |  | + | + | + | + |   |   |                |                                                                                      | homoserine O-acetyltransferase                          |
| 66521 |  |   |   |   |   |   |   | 2.283 up       | 2.125<br>down                                                                        | unknown protein                                         |
| 66524 |  | + | + | + | + | + | + |                |                                                                                      | Complex_LYRComplex protein (LYR family)                 |
| 66534 |  |   |   |   |   |   |   | 14.354<br>down | 3.374<br>down                                                                        | Cytochrome P450 CYP2 subfamily                          |
| 66541 |  | + | + | + | + | + | + |                |                                                                                      | methylisocitrate lyase                                  |
| 66544 |  |   |   |   |   |   |   |                |                                                                                      | NAD binding NADP oxidoreductase coenzyme F420-dependent |
| 66550 |  | + | + | + | + | + | + |                |                                                                                      | signal recognition particle receptor. beta subunit      |
| 66551 |  |   |   |   |   |   |   | 2.368<br>down  | 2.445<br>down                                                                        | AAA ATPase                                              |
| 66562 |  |   |   |   |   |   |   |                |                                                                                      | unknown protein                                         |
| 66563 |  |   |   |   |   |   |   | 2.132 up       | 2.812 up                                                                             | unknown protein                                         |
| 66583 |  | + | + | + |   |   | + |                |                                                                                      | unknown protein                                         |
| 66592 |  | + |   | + |   |   |   |                |                                                                                      | Fumarylacetoacetate (FAA) hydrolase                     |
| 66598 |  |   |   |   |   |   |   | 3.037<br>down  | 3.008<br>down                                                                        | NADPH:quinone oxidoreductase                            |

|       |   |   |   |   |   |   |             |            |                                                    |
|-------|---|---|---|---|---|---|-------------|------------|----------------------------------------------------|
| 66604 | + | + | + | + | + | + |             |            | 1-alkyl-2-acetyl-glycerophosphocholine esterase    |
| 66606 |   |   |   |   |   |   | 1.256 up    | 2.361 down | Zn2Cys6 transcriptional regulator                  |
| 66608 | + | + | + | + | + | + |             |            | dipeptidyl aminopeptidase. alpha factor processing |
| 66609 | + | + | + | + | + | + |             |            | unknown protein                                    |
| 66611 |   |   |   |   |   |   |             |            | Amino acid transporter LysP                        |
| 66614 |   |   |   |   |   |   | 1.167 down  | 3.892 down | alpha/beta hydrolase                               |
| 66616 |   |   |   |   |   |   |             |            | Purple acid phosphatase                            |
| 66647 |   |   |   |   |   |   |             |            | Haloacid dehalogenase-like hydrolase               |
| 66657 |   |   |   |   |   |   | 1.494 down  | 3.626 down | MFS permease                                       |
| 66662 |   |   |   |   |   |   | 1.148 down  | 3.023 down | Mandelate racemase/muconate lactonizing protein    |
| 66679 |   |   |   |   |   |   |             |            | unknown protein                                    |
| 66687 | + | + | + | + | + | + |             |            | b-glycosyltransferases                             |
| 66689 |   |   |   |   |   |   |             |            | Adenine deaminase/adenosine deaminase              |
| 66695 | + | + | + | + | + | + |             |            | unknown protein                                    |
| 66696 |   |   |   |   |   |   |             |            | unknown protein. Duf636                            |
| 66702 | + | + | + | + | + | + |             |            | Protein phosphatase 2C-like                        |
| 66707 | + | + | + | + | + | + |             |            | 20S proteasome beta-type subunit Pre3              |
| 66719 | + | + | + | + | + | + |             |            | unknown protein                                    |
| 66726 |   |   |   |   |   |   | 10.629 down | 2.210 down | FAD binding protein                                |
| 66751 |   |   |   |   |   |   | 1.261 down  | 2.246 up   | unknown protein                                    |
| 66753 |   |   |   |   |   |   | 1.065 up    | 3.341 up   | unknown protein                                    |
| 66758 |   |   |   |   |   |   | 1.479 down  | 2.110 up   | Ankyrin                                            |
| 66766 |   |   |   |   |   |   | 1.758 down  | 19.235 up  | Carbon-nitrogen hydrolase                          |

|       |   |   |   |   |   |   |   |   |                |               |                                                          |
|-------|---|---|---|---|---|---|---|---|----------------|---------------|----------------------------------------------------------|
| 66776 |   |   |   |   |   |   |   |   | 1.399<br>down  | 2.410 up      | unknown protein                                          |
| 66786 |   |   |   |   |   |   |   |   | 4.715<br>down  | 2.649<br>down | unknown protein                                          |
| 66788 |   |   |   |   |   |   |   |   | 3.890 up       | 5.984 up      | unknown protein                                          |
| 66789 |   |   |   |   |   |   |   |   |                |               | GH75 chitosanase                                         |
| 66792 |   |   |   | + | + | + | + | + |                |               | GH17 glucan endo-1.3-β-glucosidase                       |
| 66795 | + | + | + |   |   |   |   |   |                |               | GMC oxidoreductase family protein                        |
| 66804 |   |   |   | + | + | + | + | + | 1.376<br>down  | 2.571<br>down | GH69: candidate α-glycosyltransferase                    |
| 66814 |   |   |   | + | + | + | + | + |                |               | GT α-1.3-mannosyltransferase                             |
| 66819 |   |   |   |   |   |   |   |   | 1.208<br>down  | 2.170<br>down | Amino acid transporter LysP                              |
| 66827 |   |   |   |   |   |   |   |   | 1.251<br>down  | 4.262<br>down | Zinc-containing alcohol dehydrogenase                    |
| 66828 |   |   |   | + | + | + | + | + | 1.603 up       | 2.380<br>down | Zn2Cys6 transcriptional regulator                        |
| 66832 |   |   |   |   |   |   |   |   |                |               | GH3 β-glucosidase                                        |
| 66835 |   |   |   | + | + | + | + | + |                |               | NADH-ubiquinone oxidoreductase 9.5 kDa subunit. putative |
| 66843 |   |   |   |   |   | + |   |   |                |               | GH16 cell wall glucanosyltransferase                     |
| 66844 |   |   |   | + | + | + | + | + |                |               | GPI ethanolamine phosphate transferase. putative         |
| 66854 |   |   |   |   |   |   |   |   |                |               | Monocarboxylate transporter                              |
| 66859 |   |   |   |   |   |   |   |   | 1.205 up       | 4.750 up      | serine peptidase S28                                     |
| 66865 |   |   |   | + | + | + |   |   | 3.263<br>down  | 4.034<br>down | unknown protein                                          |
| 66877 |   |   |   |   |   |   |   |   | 1.094<br>down  | 2.003<br>down | unknown protein                                          |
| 66881 |   |   |   | + | + | + | + | + |                |               | unknown protein                                          |
| 66888 |   |   |   | + |   |   |   |   | 11.913<br>down | 5.286<br>down | GT α-1.3-mannosyltransferase                             |
| 66895 |   |   |   |   | + |   |   |   | 1.971 up       | 4.834 up      | 3' exoribonuclease                                       |
| 66913 |   |   |   | + | + | + | + | + |                |               | Phosphatidylinositol 3-kinase Vps34                      |

|       |   |   |   |   |   |   |               |               |                                                               |
|-------|---|---|---|---|---|---|---------------|---------------|---------------------------------------------------------------|
| 66926 | + | + | + | + | + | + |               |               | unknown protein                                               |
| 66928 |   |   |   |   |   |   |               |               | Serine/threonine-protein kinase tel1                          |
| 66929 | + | + | + | + |   | + |               |               | unknown protein                                               |
| 66935 |   |   |   |   |   |   |               |               | Phosphatidylserine decarboxylase                              |
| 66937 | + |   | + |   |   |   | 1.717<br>down | 4.094<br>down | FAD binding domain-containing protein                         |
| 66950 |   |   |   |   |   |   | 1.020 up      | 2.504<br>down | serine/threonine protein kinase.                              |
| 66958 | + | + | + | + | + | + |               |               | Mitochondrial carrier protein                                 |
| 66960 | + | + | + | + | + | + |               |               | zinc binding oxidoreductase                                   |
| 66963 | + | + | + | + | + | + |               |               | MFS permease                                                  |
| 66966 | + | + | + | + | + | + |               |               | unknown protein                                               |
| 66985 | + | + | + | + | + | + |               |               | stress activated MAP kinase interacting protein               |
| 66999 |   |   |   |   |   |   | 1.480<br>down | 6.807 up      | AMP-dependent synthetase and ligase. putative                 |
| 67003 |   |   |   |   |   |   |               |               | PabA. Anthranilate/para-aminobenzoate synthases component II; |
| 67008 | + | + | + | + | + | + |               |               | unknown protein                                               |
| 67010 | + | + | + | + | + | + |               |               | ceramide synthase membrane component Lag1                     |
| 67013 |   |   |   |   |   |   |               |               | catalase                                                      |
| 67024 |   | + | + |   |   |   | 1.411<br>down | 3.681 up      | unknown protein                                               |
| 67026 |   |   |   |   |   |   |               |               | siderophore transporter                                       |
| 67030 | + | + |   |   |   |   |               |               | unknown protein                                               |
| 67035 | + | + | + | + | + | + | 1.492<br>down | 4.701<br>down | unknown protein                                               |
| 67052 |   | + |   |   |   |   |               |               | unknown protein                                               |
| 67053 | + | + | + | + | + | + | 1.132<br>down | 2.145<br>down | Ubiquitin carboxyl-terminal hydrolase                         |
| 67057 | + | + | + | + | + | + |               |               | silencing information regulator. Sir2 family                  |
| 67079 |   |   |   |   |   |   |               |               | unknown protein                                               |
| 67084 |   |   |   |   |   |   |               |               | unknown protein                                               |

|       |   |   |   |   |   |   |               |               |                                                                                     |
|-------|---|---|---|---|---|---|---------------|---------------|-------------------------------------------------------------------------------------|
| 67107 | + | + | + | + | + | + | 2.535 up      | 3.231 up      | MutS-related protein involved in mismatch repair                                    |
| 67108 | + |   |   |   |   |   |               |               | unknown protein                                                                     |
| 67109 |   |   |   |   |   |   | 1.288<br>down | 3.491 up      | unknown protein                                                                     |
| 67110 | + | + | + | + | + | + |               |               | unknown protein                                                                     |
| 67116 | + | + | + | + | + | + |               |               | ADP-ribosylation factor-like protein. arl3; GTPase of the Ras superfamily           |
| 67117 |   |   | + |   |   |   |               |               | 3'-5' exonuclease                                                                   |
| 67130 | + | + | + | + | + | + |               |               | elongator complex protein                                                           |
| 67133 | + | + | + | + | + | + | 2.323<br>down | 2.620<br>down | unknown protein                                                                     |
| 67147 | + | + | + | + | + | + |               |               | dTDP-glucose 4.6-dehydratase                                                        |
| 67174 | + | + | + | + | + | + |               |               | origin recognition complex subunit Orc5. putative                                   |
| 67189 |   |   |   |   |   |   |               |               | NRPS                                                                                |
| 67205 |   |   |   |   |   |   |               |               | arginine-tRNA-protein transferase.                                                  |
| 67209 | + | + | + | + | + | + |               |               | Forkhead                                                                            |
| 67215 | + | + | + | + | + | + |               |               | PrsA Phosphoribosylpyrophosphate synthetase                                         |
| 67217 | + | + | + | + | + | + |               |               | iron-sulfur cluster assembly accessory protein Isa1. putative                       |
| 67239 |   |   |   |   |   |   |               |               | unknown protein                                                                     |
| 67272 | + | + | + | + | + | + | 1.492<br>down | 2.516<br>down | CRO1. required for syncytial to cellular transision. involved in sexual development |
| 67275 |   | + | + |   |   |   | 2.518 up      | 2.241 up      | RAS1                                                                                |
| 67281 | + | + | + | + | + | + |               |               | unknown protein with WD repeats                                                     |
| 67286 |   |   |   |   |   |   | 1.279<br>down | 3.345<br>down | unknown protein                                                                     |
| 67290 |   |   |   |   |   |   | 1.231 up      | 3.539 up      | unknown protein                                                                     |
| 67295 |   | + |   |   |   |   |               |               | unknown protein                                                                     |
| 67300 | + | + | + | + | + | + |               |               | unknown protein                                                                     |
| 67324 | + |   |   |   |   |   |               |               | unknown protein                                                                     |
| 67325 | + | + | + | + | + | + |               |               | U3 small nucleolar ribonucleoprotein Mpp10                                          |
| 67334 |   |   |   |   |   |   |               |               | MFS permease                                                                        |
| 67339 | + | + | + | + | + | + |               |               | Zn2Cys6 transcriptional regulator                                                   |

|       |  |   |   |   |   |   |   |               |                                                                                         |                                                                     |
|-------|--|---|---|---|---|---|---|---------------|-----------------------------------------------------------------------------------------|---------------------------------------------------------------------|
| 67350 |  | + | + |   |   |   |   |               | unknown protein                                                                         |                                                                     |
| 67356 |  | + | + | + | + | + | + |               | t-SNARE. Pep12. Golgi and vacuole                                                       |                                                                     |
| 67360 |  |   |   |   |   |   |   |               | unknown protein with WD repeats                                                         |                                                                     |
| 67366 |  | + | + | + | + | + | + |               | ribosomal protein MRPL49.                                                               |                                                                     |
| 67377 |  |   |   |   |   |   |   |               | Cytochrome P450 / E-class P450. group I                                                 |                                                                     |
| 67382 |  | + | + | + | + | + | + |               | endosomal t-SNARE Syn8                                                                  |                                                                     |
| 67394 |  | + | + | + | + | + | + |               | unknown protein                                                                         |                                                                     |
| 67408 |  |   | + | + |   |   |   |               | AMA1 which is an activator of meiotic anaphase promoting complex and required for initi |                                                                     |
| 67418 |  |   |   |   |   |   |   | 1.399 up      | 3.015 up                                                                                | C2H2 transcription factor                                           |
| 67420 |  | + | + | + | + | + | + |               |                                                                                         | Autophagic death protein Aut7/IDI-7                                 |
| 67430 |  |   |   |   |   |   |   |               |                                                                                         | unknown protein                                                     |
| 67446 |  |   |   |   |   |   |   |               |                                                                                         | ThrC Threonine synthase                                             |
| 67448 |  |   | + | + |   |   |   | 1.030<br>down | 3.245<br>down                                                                           | AGA_beta. Aspartylglucosaminidase family                            |
| 67467 |  | + | + | + | + | + | + |               |                                                                                         | SepB                                                                |
| 67469 |  | + | + | + | + | + | + | 3.172<br>down | 3.022<br>down                                                                           | MFS permease (maltose permease)                                     |
| 67470 |  |   |   |   |   |   |   |               |                                                                                         | unknown protein                                                     |
| 67472 |  |   |   |   |   |   |   |               |                                                                                         | unknown protein                                                     |
| 67473 |  | + | + | + | + | + | + |               |                                                                                         | v-SNARE Vti1; cis-Golgi membrane traffic; vacuolar sorting pathways |
| 67476 |  | + | + | + | + | + | + |               |                                                                                         | transcriptional regulator. unknown                                  |
| 67483 |  | + | + | + |   |   |   |               |                                                                                         | Zn2Cys6 transcriptional regulator                                   |
| 67484 |  |   |   |   |   |   |   |               |                                                                                         | AMP deaminase                                                       |
| 67493 |  |   |   |   |   |   |   |               |                                                                                         | Alkaline phytoceramidase                                            |
| 67494 |  |   |   |   |   |   |   | 1.575<br>down | 4.957<br>down                                                                           | Golgi GDP-mannose transporter                                       |
| 67504 |  |   |   |   |   |   |   |               |                                                                                         | ribosomal protein S2.                                               |
| 67507 |  | + | + | + | + | + | + |               |                                                                                         | Triacylglycerol lipase                                              |
| 67509 |  |   |   |   |   |   |   |               |                                                                                         | unknown protein                                                     |
| 67523 |  | + | + | + | + | + | + |               |                                                                                         | choline-phosphate cytidyltransferase                                |

|       |   |   |   |   |   |   |                |               |  |                                                                                        |
|-------|---|---|---|---|---|---|----------------|---------------|--|----------------------------------------------------------------------------------------|
| 67527 |   |   |   |   |   |   |                |               |  | Mus81p. a subunit of the Mus81-Mms4 structure-specific endonuclease functioning in mit |
| 67534 | + | + | + | + | + | + |                |               |  | serine/threonine-protein kinase                                                        |
| 67538 | + | + | + | + | + | + | 26.140<br>down | 6.954<br>down |  | Catalase                                                                               |
| 67540 |   |   |   |   |   |   |                |               |  | unknown protein                                                                        |
| 67541 |   |   |   |   |   |   |                |               |  | MFS permease                                                                           |
| 67546 | + | + | + | + | + | + |                |               |  | unknown protein                                                                        |
| 67557 | + | + | + | + | + | + |                |               |  | peptidyl-prolyl cis/trans isomerase                                                    |
| 67562 | + | + |   |   |   |   |                |               |  | unknown protein                                                                        |
| 67579 |   |   |   |   |   |   | 2.166<br>down  | 2.901 up      |  | phospholipase A2                                                                       |
| 67588 |   |   |   |   |   |   |                |               |  | NADH-dehydrogenase (ubiquinone)                                                        |
| 67595 | + | + | + | + | + | + |                |               |  | unknown protein                                                                        |
| 67597 |   |   |   |   |   |   |                |               |  | unknown protein                                                                        |
| 67600 |   |   |   |   |   |   | 1.108 up       | 3.619 up      |  | Fungal chitin synthase                                                                 |
| 67605 |   |   |   |   |   |   | 1.152 up       | 3.525<br>down |  | unknown protein                                                                        |
| 67607 |   |   |   |   |   |   | 1.160 up       | 4.956 up      |  | unknown protein                                                                        |
| 67616 |   | + |   |   |   |   | 1.632<br>down  | 2.155<br>down |  | unknown protein                                                                        |
| 67627 |   |   |   |   |   |   | 1.034 up       | 2.664 up      |  | short chain dehydrognease/reductase                                                    |
| 67639 | + |   | + |   |   |   | 1.038<br>down  | 2.249<br>down |  | IlvB. Thiamine pyrophosphate-requiring enzymes                                         |
| 67642 |   |   |   |   |   |   |                |               |  | unknown protein. UPF0075                                                               |
| 67647 | + | + | + | + | + | + |                |               |  | unknown protein containing a putative BTB/POZ domain                                   |
| 67658 |   |   | + |   |   |   |                |               |  | A/G-specific adenine DNA glycosylase                                                   |
| 67678 |   |   |   |   |   |   | 1.211 up       | 4.457 up      |  | chitin deacetylase                                                                     |
| 67692 |   |   |   |   |   |   | 2.318<br>down  | 2.175<br>down |  | MFS permease                                                                           |
| 67698 |   |   |   |   |   |   | 1.450 up       | 2.387 up      |  | nucleotide sugar dehydrogenase (UDP-Glc?)                                              |



|       |  |   |   |   |   |   |                |               |                                                         |
|-------|--|---|---|---|---|---|----------------|---------------|---------------------------------------------------------|
| 67699 |  |   |   |   |   |   | 15.411<br>down | 3.753<br>down | FAD/NAD-oxidoreductase. only in Hypocreaceae            |
| 67707 |  |   |   |   |   |   | 1.340 up       | 2.879 up      | unknown protein with TLC domain                         |
| 67717 |  |   |   |   |   |   | 1.614<br>down  | 3.520<br>down | unknown protein. $\beta$ -lactamase HMMPfam             |
| 67718 |  |   |   |   |   |   |                |               | Malate/L-lactate dehydrogenase                          |
| 67732 |  |   |   |   |   |   |                |               | MRP-type ABC transporter                                |
| 67738 |  |   |   |   |   |   |                |               | unknown protein                                         |
| 67742 |  |   |   |   |   |   |                |               | QDE1. RdRP. essential for quelling                      |
| 67751 |  |   |   |   |   |   |                |               | unknown protein                                         |
| 67752 |  |   |   |   |   |   |                |               | MFS permease                                            |
| 67757 |  |   |   |   |   |   |                |               | 4.5-dioxygenase (only in <i>Amanita muscaria</i> )      |
| 67761 |  |   | + |   |   |   | 2.447 up       | 3.908 up      | calpain-like protease                                   |
| 67772 |  |   |   |   |   |   |                |               | Isoflavone reductase                                    |
| 67778 |  |   |   |   |   |   |                |               | Hydroxysteroid 17-beta dehydrogenase 11                 |
| 67795 |  | + | + | + | + | + |                |               | Ankyrin                                                 |
| 67806 |  |   |   |   |   |   |                |               | Amino acid permease                                     |
| 67840 |  | + | + | + | + | + |                |               | UTP11. encoding a component of the SSU processome       |
| 67844 |  |   |   | + |   |   |                |               | GH76 $\alpha$ -1.6-mannanase                            |
| 67859 |  |   |   |   |   |   |                |               | aspartyl-tRNA synthase.                                 |
| 67866 |  |   |   |   |   |   | 3.890<br>down  | 2.442<br>down | unknown protein                                         |
| 67868 |  |   |   |   |   |   |                |               | unknown protein                                         |
| 67882 |  |   |   |   |   |   |                |               | unknown protein with NUDIX domain (hydrolase)           |
| 67902 |  | + | + | + |   |   |                |               | unknown secreted protein                                |
| 67907 |  | + | + |   |   |   |                |               | transfer of mannosylphosphate                           |
| 67923 |  | + | + | + | + | + |                |               | unknown protein                                         |
| 67929 |  |   |   |   |   |   |                |               | Cytidine/deoxycytidylate deaminase. zinc-binding region |
| 67931 |  |   |   |   |   |   |                |               | phosphatidylethanolamine N-methyltransferase            |
| 67938 |  | + | + |   |   |   |                |               | short chain dehydrogenase/reductase                     |

|       |   |   |   |   |   |   |               |               |                                                                         |
|-------|---|---|---|---|---|---|---------------|---------------|-------------------------------------------------------------------------|
| 67941 | + | + | + | + | + | + |               |               | unknown protein                                                         |
| 67957 | + | + | + | + | + | + |               |               | Cdk-activating kinase assembly factor (MAT 1)                           |
| 67958 |   |   |   |   |   |   | 1.153<br>down | 2.276 up      | unknown protein. only present in Magnaporthe. Chaetomium and Gibberella |
| 67964 |   | + | + |   |   |   | 2.182<br>down | 2.462<br>down | Cytochrome P450 CYP2 subfamily                                          |
| 67971 |   |   |   |   |   |   |               |               | MYND-type Zn-finger protein                                             |
| 67982 | + | + | + |   | + | + |               |               | protein kinase WEE1. cell cycle control                                 |
| 67983 |   | + | + |   |   |   |               |               | nuclear migration protein. ami1. of N. crassa                           |
| 67988 |   |   |   |   |   |   |               |               | unknown protein                                                         |
| 68000 | + | + | + | + | + | + |               |               | thiopurine S-methyltransferase. putative                                |
| 68019 |   |   |   |   |   |   | 2.337<br>down | 4.319<br>down | beta-lactamase superfamily                                              |
| 68022 | + | + | + | + | + | + |               |               | geranylgeranyl diphosphate synthase. related to N. crassa albino-3      |
| 68026 | + | + | + | + | + | + |               |               | integral peroxisomal membrane peroxin. putative                         |
| 68028 |   |   |   |   |   |   | 1.039<br>down | 2.340<br>down | unknown protein                                                         |
| 68036 |   |   |   |   |   |   | 1.572<br>down | 2.329<br>down | Cystathionine beta-lyases/cystathionine gamma-synthases                 |
| 68058 |   |   |   |   |   |   |               |               | unknown protein                                                         |
| 68064 | + | + | + | + |   |   |               |               | GH43 $\beta$ -xylosidase/ $\alpha$ -L-arabinofuranosidase               |
| 68067 | + | + | + | + | + | + |               |               | meu10. a GPI-anchored cell wall protein.                                |
| 68068 | + | + | + | + | + | + | 1.157<br>down | 2.086<br>down | unknown protein                                                         |
| 68072 |   | + |   |   |   |   |               |               | HHH-GPD superfamily base excision DNA repair protein                    |
| 68080 | + | + | + | + | + | + |               |               | unknown protein                                                         |
| 68086 |   |   |   |   |   |   | 1.050 up      | 3.395<br>down | unknown protein                                                         |
| 68097 | + | + | + | + | + | + |               |               | MADS-box                                                                |
| 68104 |   |   |   |   |   |   |               |               | unknown protein                                                         |
| 68106 | + | + | + | + | + | + |               |               | unknown protein                                                         |

|       |   |   |   |   |   |   |               |               |                                                                                              |
|-------|---|---|---|---|---|---|---------------|---------------|----------------------------------------------------------------------------------------------|
| 68107 | + | + | + | + | + | + |               |               | Ribosomal protein S30 by homology with the corresponding protein of <i>Ashbya gossypii</i> . |
| 68110 | + | + | + | + | + | + |               |               | cyclin-dependent kinase regulatory subunit                                                   |
| 68122 | + | + | + |   |   |   |               |               | MFS permease                                                                                 |
| 68130 | + | + | + | + | + | + |               |               | unknown protein                                                                              |
| 68131 |   |   |   |   |   |   | 1.392<br>down | 2.566<br>down | heterocompatibility domain protein                                                           |
| 68154 | + | + | + | + | + | + |               |               | unknown protein                                                                              |
| 68161 |   |   |   |   |   |   | 2.279<br>down | 4.504<br>down | Arylacetamide deacetylase                                                                    |
| 68169 |   |   |   |   |   |   | 3.450<br>down | 2.553<br>down | Calcium transporter                                                                          |
| 68178 |   | + | + |   |   |   |               |               | unknown protein. HAD superfamily hydrolase                                                   |
| 68184 | + | + | + | + | + | + |               |               | pre-rRNA processing protein Esf1                                                             |
| 68192 |   |   | + |   |   |   |               |               | dynamain family protein                                                                      |
| 68204 |   |   |   |   |   |   | 1.209 up      | 3.375<br>down | NRPS                                                                                         |
| 68207 | + | + |   |   |   |   |               |               | SSCRP                                                                                        |
| 68208 | + | + | + | + | + | + |               |               | unknown protein                                                                              |
| 68212 |   |   |   |   |   |   |               |               | GCPR. mPR-type                                                                               |
| 68230 | + | + | + | + | + | + |               |               | N-methylhydantoinase A/acetone carboxylase HyuA. beta subunit                                |
| 68254 |   |   |   |   |   |   |               |               | Zn2Cys6 transcriptional regulator                                                            |
| 68274 |   |   |   |   |   |   |               |               | unknown protein                                                                              |
| 68279 | + | + | + | + | + | + | 4.046<br>down | 5.749<br>down | Short-chain dehydrogenase/reductase                                                          |
| 68291 |   | + |   |   |   |   |               |               | pyruvate formate lyase activating enzyme (radical SAM superfamily)                           |
| 68304 | + | + | + | + | + | + |               |               | 26S proteasome regulatory complex subunit Rpn5                                               |
| 68326 | + | + | + | + | + | + |               |               | unknown protein                                                                              |
| 68336 |   |   |   |   |   |   | 1.171 up      | 2.489 up      | short chain dehydrogenase/reductase                                                          |
| 68338 | + | + | + | + | + | + |               |               | NIPSNAP family protein                                                                       |
| 68347 |   |   |   |   |   |   |               |               | GH18. chitinase CHI 18-16                                                                    |
| 68348 |   |   |   |   |   |   | 4.893 up      | 11.521 up     | SAM-dependent methyltransferase                                                              |

|       |   |   |   |   |   |   |   |   |               |               |                                                 |
|-------|---|---|---|---|---|---|---|---|---------------|---------------|-------------------------------------------------|
| 68358 |   |   |   |   |   |   |   |   |               |               | unknown protein                                 |
| 68364 |   |   | + | + | + | + | + | + |               |               | Protein kinase                                  |
| 68371 |   |   |   |   |   |   |   |   | 1.138<br>down | 4.760 up      | protein kinase. unusual                         |
| 68401 |   |   |   |   |   |   |   |   | 1.199 up      | 3.353 up      | unknown protein                                 |
| 68412 |   |   | + | + | + | + |   | + |               |               | Sphingoid long-chain base kinase                |
| 68425 | + | + | + |   |   |   |   |   |               |               | unknown protein                                 |
| 68427 |   |   |   |   |   |   |   |   |               |               | metal-dependent phosphohydrolase                |
| 68430 |   |   | + | + | + | + | + | + |               |               | unknown protein                                 |
| 68436 |   |   | + | + | + | + | + | + |               |               | unknown protein                                 |
| 68438 |   |   | + | + | + | + | + | + |               |               | vacuolar import and degradation protein. vid24  |
| 68444 |   |   |   |   |   |   |   |   |               |               | haloacid dehalogenase-like hydrolase. putative  |
| 68455 |   |   |   | + | + |   |   |   | 1.145<br>down | 2.398<br>down | Zn2Cys6 transcriptional regulator               |
| 68466 |   |   |   |   |   |   |   |   | 1.060<br>down | 2.389 up      | glycerone kinase                                |
| 68470 |   |   |   |   |   |   |   |   |               |               | GT4 glycosyl transferase                        |
| 68479 |   |   | + | + | + | + | + | + |               |               | unknown protein                                 |
| 68492 |   |   | + | + | + | + | + | + |               |               | unknown proteinsterol binding protein           |
| 68497 |   |   | + | + | + | + | + | + |               |               | unknown protein                                 |
| 68499 |   |   |   |   |   |   |   |   |               |               | unknown protein                                 |
| 68508 |   |   |   |   |   |   |   |   | 1.011 up      | 2.661<br>down | unknown protein                                 |
| 68522 |   |   |   |   |   |   |   |   |               |               | Adenosine deaminase-related growth factors      |
| 68527 |   |   | + | + | + | + | + | + |               |               | UVSD; probable regulator of DNA damage response |
| 68548 |   |   |   | + |   |   |   |   |               |               | unknown protein                                 |
| 68566 |   |   | + | + | + |   |   |   |               |               | unknown protein                                 |
| 68571 |   |   |   |   |   |   |   |   |               |               | AAA ATPase. central region                      |
| 68574 |   |   |   |   |   |   |   |   | 7.717<br>down | 3.343<br>down | unknown protein                                 |
| 68582 |   |   | + | + | + |   |   |   |               |               | tRNA ligase TRL1                                |

|       |   |   |   |   |   |   |               |                |                                                                                           |
|-------|---|---|---|---|---|---|---------------|----------------|-------------------------------------------------------------------------------------------|
| 68585 |   |   |   |   |   |   |               |                | galactose-6-phosphate isomerase                                                           |
| 68587 |   |   |   |   |   |   |               |                | unknown protein. only in Gibberella. Magnaporthe. Coccidioides and Chaetomium             |
| 68588 |   |   |   |   |   |   |               |                | unknown protein                                                                           |
| 68590 |   |   |   |   |   |   | 1.715<br>down | 2.584<br>down  | Alcohol dehydrogenase. class V                                                            |
| 68605 |   |   |   |   |   |   |               |                | DNA/RNA methyltransferase. Shares significant amino acid sequence identity (E = 0.0) with |
| 68606 |   |   |   |   |   |   |               |                | triose-phosphate isomerase                                                                |
| 68608 | + | + | + | + | + |   | 1.260<br>down | 2.507<br>down  | Thiazole biosynthetic enzyme (Stress-inducible protein sti35)                             |
| 68615 |   |   |   |   |   |   |               |                | Amidase                                                                                   |
| 68618 |   |   |   |   |   |   |               |                | unknown protein                                                                           |
| 68622 |   |   |   |   |   |   |               |                | unknown protein                                                                           |
| 68624 | + | + | + | + | + | + |               |                | unknown protein                                                                           |
| 68636 | + | + | + | + | + | + | 1.349 up      | 2.275 up       | ribosomal protein S11                                                                     |
| 68640 |   |   |   |   |   |   | 1.331 up      | 2.079 up       | unknown protein                                                                           |
| 68647 | + | + | + | + | + | + |               |                | unknown protein                                                                           |
| 68660 |   |   |   |   |   |   |               |                | unknown protein                                                                           |
| 68662 |   |   |   |   |   |   |               |                | aspartyl protease                                                                         |
| 68704 |   |   |   |   |   |   |               |                | Arylacetamide deacetylase                                                                 |
| 68705 | + | + |   | + | + | + | 1.079 up      | 34.693<br>down | cytochrome P450 monooxygenase                                                             |
| 68706 |   |   |   |   |   |   |               |                | unknown protein. only in hypocreaceae                                                     |
| 68717 | + | + | + | + | + | + |               |                | unknown protein                                                                           |
| 68728 | + | + | + | + | + | + |               |                | hexaprenyl pyrophosphate synthase                                                         |
| 68729 | + | + | + | + | + | + |               |                | unknown protein                                                                           |
| 68755 |   |   |   |   |   |   | 5.158<br>down | 10.057<br>down | short chain dehydrogenase/reductase                                                       |
| 68803 |   |   |   |   |   |   |               |                | RTA1 like protein                                                                         |
| 68812 |   |   |   |   |   |   |               |                | MFS permease                                                                              |
| 68813 |   |   | + |   |   |   | 3.217<br>down | 2.939<br>down  | MFS permease                                                                              |

|       |   |   |   |   |   |   |   |               |               |                                                                 |
|-------|---|---|---|---|---|---|---|---------------|---------------|-----------------------------------------------------------------|
| 68821 |   |   |   |   |   |   |   |               |               | B-glycosyltransferase                                           |
| 68831 |   |   |   |   |   |   |   |               |               | GT $\alpha$ -1.2-mannosyltransferase                            |
| 68842 |   |   |   |   |   |   |   |               |               | unknown protein                                                 |
| 68843 |   |   |   |   |   |   |   |               |               | unknown protein                                                 |
| 68850 |   | + | + | + | + | + | + |               |               | unknown protein                                                 |
| 68869 |   |   |   |   |   |   |   |               |               | MFS permease                                                    |
| 68875 |   | + | + | + | + | + | + |               |               | unknown protein                                                 |
| 68876 |   | + | + | + | + | + | + |               |               | unknown protein                                                 |
| 68889 |   |   |   |   |   |   |   | 1.881<br>down | 3.905<br>down | PDR-type ABC transporters                                       |
| 68909 |   | + | + | + | + | + | + |               |               | 40s ribosomal protein S26E (CRP5) (13.6 kDa ribosomal protein). |
| 68924 |   |   |   |   |   |   |   | 7.616 up      | 16.584 up     | cyclopropane/fatty acid synthase; plant related                 |
| 68925 |   |   |   |   |   |   |   | 1.051<br>down | 2.454<br>down | MFS permease                                                    |
| 68926 |   | + | + | + | + | + | + |               |               | actin polymerization protein Bzz1. putative                     |
| 68927 | + | + | + | + | + | + | + | 1.069 up      | 2.266<br>down | unknown protein                                                 |
| 68930 |   |   |   |   |   |   |   |               |               | unknown protein                                                 |
| 68941 |   |   |   |   |   |   |   |               |               | Glutathione S-transferase                                       |
| 68948 |   |   |   |   |   |   |   |               |               | unknown protein                                                 |
| 68950 |   |   |   |   |   |   |   |               |               | chloroperoxidase                                                |
| 68956 |   |   |   | + |   |   |   |               |               | D-aspartate oxidase                                             |
| 68961 |   |   |   |   |   |   |   |               |               | esterase                                                        |
| 68966 |   |   |   |   |   |   |   | 1.034<br>down | 2.063<br>down | flavoprotein. putative                                          |
| 68972 |   |   |   |   |   |   |   |               |               | MFS permease                                                    |
| 68973 |   |   |   |   |   |   |   |               |               | acid phosphatase with metalloesterase domain                    |
| 68988 |   |   |   |   |   |   |   |               |               | unknown protein                                                 |
| 68990 |   |   |   |   |   |   |   | 1.242 up      | 3.578<br>down | MFS permease                                                    |
| 68997 |   |   |   |   |   |   |   |               |               | unknown TPR domain protein. unknown                             |

|       |   |   |   |   |   |   |               |               |                                                                          |
|-------|---|---|---|---|---|---|---------------|---------------|--------------------------------------------------------------------------|
| 69013 | + | + | + | + | + | + |               |               | unknown protein                                                          |
| 69021 | + | + | + | + | + | + |               |               | SSCRP                                                                    |
| 69026 |   |   |   |   |   |   | 1.237<br>down | 2.080<br>down | MFS permease                                                             |
| 69035 | + | + | + | + | + | + |               |               | Choline phosphate cytidyltransferase/Predicted CDP-ethanolamine synthase |
| 69052 |   |   |   |   |   |   |               |               | recombination hotspot-binding protein (Translin). putative               |
| 69055 |   |   |   |   |   |   |               |               | unknown protein                                                          |
| 69061 | + | + | + |   |   |   |               |               | phosphoglycerate mutase                                                  |
| 69064 |   |   |   |   |   |   |               |               | SSCRP                                                                    |
| 69066 |   |   |   |   |   |   |               |               | alpha/beta hydrolase                                                     |
| 69068 |   | + |   |   |   |   |               |               | contains: UBA/TS-N domain and DNA-binding domain                         |
| 69077 | + |   | + |   |   | + |               |               | Zn2Cys6 transcriptional regulator                                        |
| 69081 |   |   |   |   |   |   |               |               | mitochondrial cytochrome b2. putative                                    |
| 69115 |   |   |   |   |   |   |               |               | dienelactone hydrolase                                                   |
| 69118 | + | + | + | + | + | + |               |               | unknown protein                                                          |
| 69122 | + | + | + | + | + | + |               |               | fatty acid desaturase                                                    |
| 69123 | + | + | + | + | + | + |               |               | GH76 $\alpha$ -1.6-mannanase                                             |
| 69131 | + | + | + | + | + | + | 1.105<br>down | 2.018<br>down | Unknown protein with FYVE/PHD zinc finger domain.                        |
| 69141 | + | + | + | + | + | + |               |               | neutral amino acid permeasde                                             |
| 69153 | + | + |   |   |   |   |               |               | phosphoribulokinase/uridine kinase family protein                        |
| 69164 | + | + | + |   |   |   |               |               | MFS permease                                                             |
| 69168 |   |   |   |   |   |   |               |               | CipA (Aspergillus) oxidoreductase                                        |
| 69171 |   |   |   |   |   |   | 1.728<br>down | 3.127<br>up   | unknown protein                                                          |
| 69179 |   |   |   |   |   |   |               |               | molecular chaperone. contains ABC-1 domain                               |
| 69181 |   |   |   |   |   |   | 1.129<br>down | 3.553<br>up   | unknown protein                                                          |
| 69187 |   |   |   |   |   |   |               |               | unknown protein                                                          |
| 69189 |   |   |   |   |   |   |               |               | unknown protein                                                          |

|       |   |   |   |   |   |   |               |               |                                                                                          |
|-------|---|---|---|---|---|---|---------------|---------------|------------------------------------------------------------------------------------------|
| 69210 |   |   |   |   |   |   | 1.031<br>down | 3.440 up      | FoNIIA                                                                                   |
| 69211 | + | + | + | + | + | + |               |               | GT $\alpha$ -1.2-mannosyltransferase                                                     |
| 69217 | + | + | + | + | + | + |               |               | protease-like protein                                                                    |
| 69222 | + | + | + | + | + | + |               |               | unknown protein                                                                          |
| 69224 | + | + | + | + | + | + |               |               | F-box protein involved in recycling plasma membrane proteins internalized by endocytosis |
| 69228 |   |   |   |   |   |   | 1.094<br>down | 2.637<br>down | BioA Adenosylmethionine--amino--oxononanoate aminotransferase                            |
| 69245 |   |   |   |   |   |   | 5.937<br>down | 2.282<br>down | GH2 $\beta$ -mannosidase                                                                 |
| 69257 | + | + | + | + | + | + | 1.344 up      | 2.311 up      | Peptidase M22. glycoprotease                                                             |
| 69267 | + | + | + | + | + | + |               |               | unknown protein                                                                          |
| 69276 |   |   |   |   |   |   | 2.896<br>down | 19.619 up     | GH30 endo- $\beta$ -1.4-xylanase                                                         |
| 69281 | + | + | + | + | + | + |               |               | cation diffusion facilitator family transporter                                          |
| 69282 | + | + |   |   |   |   | 3.538<br>down | 4.297<br>down | monocarboxylate transporter                                                              |
| 69287 | + | + | + | + | + | + | 1.318 up      | 2.617 up      | unknown protein                                                                          |
| 69288 |   | + |   |   |   |   |               |               | unknown protein                                                                          |
| 69290 |   |   | + |   |   |   |               |               | Asparaginase. Asparaginase (amidohydrolase); 3' domain cd00204. ANK. ankyrin repeats     |
| 69291 |   |   |   |   |   |   | 1.081 up      | 2.804 up      | FoNIIA                                                                                   |
| 69303 |   |   |   |   |   |   | 7.661 up      | 4.594 up      | unknown protein                                                                          |
| 69316 |   |   |   |   |   |   |               |               | unknown protein                                                                          |
| 69349 | + | + | + | + | + | + |               |               | Winged helix repressor DNA-binding                                                       |
| 69362 |   |   |   |   |   |   | 1.078<br>down | 3.080<br>down | phospholipase A2 protein family                                                          |
| 69375 |   |   |   |   |   |   | 4.623<br>down | 2.086<br>down | unknown protein                                                                          |
| 69381 | + | + |   |   |   |   |               |               | nuclear protein Es2. putative                                                            |
| 69384 | + | + | + | + |   |   | 1.593<br>down | 2.602<br>down | unknown protein                                                                          |
| 69399 | + | + | + | + | + | + | 1.500 up      | 2.501 up      | mitochondrial 40S ribosomal protein [Aspergillus niger]. Possible homologue of yeast SW5 |



|       |  |   |   |   |   |   |            |            |                                                         |
|-------|--|---|---|---|---|---|------------|------------|---------------------------------------------------------|
| 69416 |  | + |   |   |   |   | 1.030 up   | 2.247 down | unknown protein                                         |
| 69423 |  | + | + | + | + | + |            |            | unknown protein                                         |
| 69425 |  |   |   |   |   |   |            |            | unknown protein                                         |
| 69426 |  |   |   |   |   |   | 2.487 down | 2.651 down | copper transporter                                      |
| 69437 |  | + | + | + | + | + |            |            | G2/mitotic-specific cyclin                              |
| 69465 |  |   |   |   |   |   |            |            | unknown protein                                         |
| 69468 |  |   | + |   |   |   |            |            | unknown protein                                         |
| 69479 |  | + | + | + | + | + | 1.180 up   | 2.111 down | unknown protein                                         |
| 69483 |  |   |   |   |   |   |            |            | unknown protein                                         |
| 69486 |  |   |   |   |   |   | 1.179 up   | 3.826 up   | unknown protein                                         |
| 69489 |  |   |   |   |   |   |            |            | serine carboxypeptidase                                 |
| 69490 |  |   |   |   |   |   | 1.036 down | 3.654 up   | CE4 chitin deacetylase                                  |
| 69493 |  |   |   |   |   |   |            |            | GH92 $\alpha$ -1.2-mannosidase                          |
| 69494 |  |   |   |   |   |   |            |            | DCL1. Dicer-like protein. involved in quelling          |
| 69496 |  | + | + | + | + |   |            |            | serine/threonine-protein kinase csk1                    |
| 69500 |  |   |   |   |   |   |            |            | PTH11 GPCR                                              |
| 69502 |  | + | + | + | + | + |            |            | short chain dehydrogenase/reductase                     |
| 69528 |  | + | + | + | + | + | 3.159 up   | 2.513 up   | unknown protein                                         |
| 69529 |  |   |   |   |   |   |            |            | $\alpha$ -ketoglutarate dependent (Fell) dioxygenase    |
| 69537 |  |   |   |   |   |   |            |            | unknown protein. contains F-box and WD repeat           |
| 69555 |  |   |   |   |   |   | 1.111 up   | 3.726 up   | aspartyl protease. Aspergillopepsin-like                |
| 69557 |  |   |   |   |   |   |            |            | GH3 $\beta$ -N-acetylglucosaminidase                    |
| 69563 |  |   |   |   |   |   |            |            | MFS permease                                            |
| 69569 |  |   |   |   |   |   | 2.283 up   | 2.392 up   | unknown protein                                         |
| 69574 |  |   |   |   |   |   | 1.370 down | 6.767 down | MFS permease                                            |
| 69605 |  |   |   |   |   |   |            |            | Cystathionine beta-lyases/cystathionine gamma-synthases |

|       |   |   |   |   |   |   |               |               |                                                                            |
|-------|---|---|---|---|---|---|---------------|---------------|----------------------------------------------------------------------------|
| 69611 |   |   |   |   |   |   |               |               | MFS permease                                                               |
| 69613 |   |   |   |   |   |   |               |               | unknown protein (Duf227)                                                   |
| 69625 |   |   |   |   |   |   |               |               | Glyoxylase                                                                 |
| 69647 |   |   |   |   |   |   |               |               | enoyl-CoA hydratase/isomerase                                              |
| 69648 |   |   |   |   |   |   | 1.449<br>down | 4.473 up      | Cytochrome P450 CYP11/CYP12/CYP24/CYP27 subfamilies                        |
| 69650 |   |   |   |   |   |   |               |               | FAD binding protein                                                        |
| 69651 |   |   |   |   |   |   |               |               | MFS permease                                                               |
| 69652 |   |   |   |   |   |   |               |               | flavin-dependent halogenase O-methyltransferase bifunctional protein       |
| 69656 |   |   |   |   |   |   |               |               | MYND zinc finger protein                                                   |
| 69663 |   |   |   |   |   |   |               |               | alpha/beta hydrolase                                                       |
| 69679 |   |   |   |   |   |   | 1.091 up      | 3.165 up      | ABC transporter                                                            |
| 69686 |   | + | + | + | + | + |               |               | unknown protein                                                            |
| 69688 |   |   |   |   |   |   | 1.121 up      | 4.039 up      | unknown protein                                                            |
| 69692 |   |   |   |   |   |   | 1.557 up      | 21.254 up     | Quinoprotein amine dehydrogenase beta chain-like protein                   |
| 69695 |   |   |   |   |   |   | 1.123<br>down | 9.330<br>down | Zn2Cys6 transcriptional regulator                                          |
| 69696 |   |   |   |   |   |   | 1.023<br>down | 4.071 up      | coenzyme F420-dependent N5,N10-methylene tetrahydromethanopterin reductase |
| 69700 |   |   |   |   |   |   |               |               | GH89 $\alpha$ -N-acetylglucosaminidase                                     |
| 69712 |   |   |   |   |   |   | 1.328<br>down | 2.110 up      | MFS permease                                                               |
| 69727 |   | + | + | + | + | + |               |               | unknown protein                                                            |
| 69736 |   |   |   |   |   |   |               |               | GH30 glucan endo 1.6- $\beta$ -glucanase                                   |
| 69742 |   |   |   |   |   |   | 2.206 up      | 8.201 up      | esterase                                                                   |
| 69751 |   |   |   |   |   |   | 1.838 up      | 2.952<br>down | GH16                                                                       |
| 69753 | + |   |   |   |   |   |               |               | ADA. Adenosine deaminase                                                   |
| 69755 |   |   |   |   |   |   |               |               | L-asparaginase II. putative                                                |
| 69757 |   |   | + | + |   |   | 1.663 up      | 2.068 up      | Peptidyl-tRNA hydrolase                                                    |
| 69769 |   |   |   |   |   |   |               |               | NADH:flavin oxidoreductase/NADH oxidase. putative                          |

|       |   |   |   |   |   |   |  |               |                             |                                                                                            |
|-------|---|---|---|---|---|---|--|---------------|-----------------------------|--------------------------------------------------------------------------------------------|
| 69771 |   |   |   |   |   |   |  |               | Monocarboxylate transporter |                                                                                            |
| 69777 |   |   |   |   |   |   |  | 1.812 up      | 3.486 up                    | unknown protein                                                                            |
| 69791 |   |   |   |   |   |   |  |               |                             | unknown protein                                                                            |
| 69793 | + | + | + | + | + | + |  |               |                             | Cyclin associated with protein kinase Kin28p. which is the TFIIH-associated carboxy-termin |
| 69805 |   |   |   |   |   |   |  | 1.046<br>down | 2.384 up                    | unknown protein                                                                            |
| 69811 |   |   |   |   |   |   |  | 2.584 up      | 7.460<br>down               | γ-glutamyltransferase                                                                      |
| 69816 |   | + | + |   |   |   |  | 1.168 up      | 2.477 up                    | aminoglycoside 3-N-acetyltransferase                                                       |
| 69823 |   |   |   |   |   |   |  |               |                             | aminotransferase. putative                                                                 |
| 69825 |   |   |   |   |   |   |  | 2.347 up      | 2.300 up                    | unknown protein                                                                            |
| 69834 |   |   |   |   |   |   |  |               |                             | MFS permease.                                                                              |
| 69838 | + | + | + | + | + | + |  |               |                             | 60S ribosome subunit biogenesis protein NIP7                                               |
| 69840 |   |   |   |   |   |   |  |               |                             | short chain dehydrogenase/reductase                                                        |
| 69841 |   |   |   |   |   |   |  | 1.006<br>down | 3.008<br>down               | unknown protein                                                                            |
| 69853 | + | + | + | + | + | + |  |               |                             | unknown protein                                                                            |
| 69857 |   |   |   |   |   |   |  | 1.198<br>down | 2.075 up                    | unknown protein                                                                            |
| 69858 |   | + | + | + | + |   |  |               |                             | diacylglycerol pyrophosphate phosphatase                                                   |
| 69863 |   |   | + |   |   |   |  |               |                             | Amidase                                                                                    |
| 69868 |   |   |   |   |   |   |  | 1.493 up      | 5.306 up                    | GDP-mannose a-mannosyltransferases;Distant relative                                        |
| 69870 |   |   |   |   |   |   |  | 1.058 up      | 3.223 up                    | FAD monooxygenase                                                                          |
| 69879 |   | + |   |   |   |   |  | 1.796 up      | 2.098 up                    | unknown protein                                                                            |
| 69881 |   |   |   |   |   |   |  | 1.086 up      | 2.584 up                    | Dit1p. spore wall maturation                                                               |
| 69883 |   |   |   |   |   |   |  | 1.557<br>down | 2.245 up                    | cytochrome P450. putative                                                                  |
| 69885 |   |   |   |   |   |   |  | 4.762<br>down | 2.134<br>down               | initiation factor 2B                                                                       |
| 69896 |   |   |   |   |   |   |  | 1.209<br>down | 3.938 up                    | alpha/beta hydrolase                                                                       |

|       |   |   |   |   |   |   |               |               |                                                                                             |
|-------|---|---|---|---|---|---|---------------|---------------|---------------------------------------------------------------------------------------------|
| 69901 |   |   |   |   |   |   | 1.300<br>down | 2.309 up      | unknown protein                                                                             |
| 69904 | + | + | + |   |   |   |               |               | PTH11 GPCR                                                                                  |
| 69920 |   |   |   |   |   |   | 1.058 up      | 2.467 up      | unknown protein                                                                             |
| 69926 |   |   |   |   |   |   |               |               | glycosyltransferases. Glycosyltransferases not yet assigned to a family                     |
| 69928 |   |   |   |   |   |   | 1.113 up      | 3.432 up      | unknown protein                                                                             |
| 69933 |   |   |   |   |   |   | 1.185 up      | 2.711<br>down | unknown protein                                                                             |
| 69944 |   |   |   |   |   |   | 3.310<br>down | 3.091 up      | GH31 α-xylosidase/α-glucosidase                                                             |
| 69946 |   |   |   |   |   |   | 3.780<br>down | 3.042<br>down | NRPS. siderophore synthase                                                                  |
| 69950 |   |   | + |   |   |   | 1.329 up      | 2.635 up      | unknown protein                                                                             |
| 69956 |   |   |   |   |   |   | 7.346<br>down | 2.442<br>down | Alcohol dehydrogenase. class V                                                              |
| 69957 |   |   |   |   |   |   |               |               | MFS permease                                                                                |
| 69960 | + | + | + | + | + | + |               |               | HIR1 (histone transcription regulator )                                                     |
| 69963 |   |   |   |   |   |   |               |               | unknown protein                                                                             |
| 69972 | + | + | + | + |   | + | 1.364<br>down | 4.630<br>down | Zn2Cys6 transcriptional regulator                                                           |
| 69975 | + | + | + | + | + | + |               |               | MFS permease                                                                                |
| 69998 | + | + | + | + | + | + |               |               | Rad14. binds to damaged DNA during nucleotide excisionRepair                                |
| 70001 |   |   |   |   |   |   |               |               | unknown protein                                                                             |
| 70017 | + | + | + | + | + | + | 1.423 up      | 5.487 up      | mitochondrial ribosomal protein S19/S15.                                                    |
| 70021 |   |   |   |   |   |   | 1.259<br>down | 2.096 up      | CE3 acetyl xylan Esterase                                                                   |
| 70025 |   |   |   |   |   |   | 1.429<br>down | 5.203<br>down | alcohol dehydrogenase. zinc-containing. putative                                            |
| 70026 | + | + | + | + | + | + |               |               | unknown protein                                                                             |
| 70028 |   |   |   |   |   |   |               |               | unknown WD40 and NACHT domain protein. unknown                                              |
| 70035 | + | + | + | + | + | + |               |               | GT α-1.3-mannosyltransferase                                                                |
| 70040 | + | + | + | + | + | + |               |               | Bet4p. alpha subunit of geranylgeranyltransferase required for vesicle traffic between ER a |

|       |   |   |   |   |   |   |   |                |                                         |                                                         |
|-------|---|---|---|---|---|---|---|----------------|-----------------------------------------|---------------------------------------------------------|
| 70071 |   | + | + | + | + | + | + |                | Zn2Cys6 transcriptional regulator       |                                                         |
| 70076 |   | + | + |   |   |   |   |                | Inositol polyphosphate kinase. putative |                                                         |
| 70084 |   | + | + | + | + | + | + |                | Nuclease (Borde 2007)                   |                                                         |
| 70090 |   |   |   |   |   |   |   |                | Carbonic anhydrase                      |                                                         |
| 70092 |   |   |   |   |   |   |   | 1.736<br>down  | 2.636<br>down                           | unknown protein                                         |
| 70096 |   |   |   |   |   |   |   | 2.064 up       | 2.380 up                                | Gβ-WD40 domain protein                                  |
| 70098 |   |   |   |   |   |   |   | 2.102<br>down  | 10.727<br>down                          | amino acid permease (GABA)                              |
| 70108 |   |   |   |   |   |   |   | 1.302<br>down  | 4.649<br>down                           | MFS permease                                            |
| 70127 |   |   |   |   |   |   |   |                |                                         | RTA1 domain protein. putative                           |
| 70139 |   |   |   |   |   |   |   |                |                                         | GPCR. mPR-type                                          |
| 70161 |   |   |   |   |   |   |   |                |                                         | unknown protein                                         |
| 70172 |   |   |   |   |   |   |   |                |                                         | MFS permease                                            |
| 70175 |   |   |   |   |   |   |   |                |                                         | thioesterase family protein                             |
| 70186 |   |   |   |   |   |   |   | 1.405<br>down  | 3.155 up                                | GH28 polygalacturonase/xylogalacturonan hydrolase       |
| 70191 |   | + | + | + | + | + | + |                |                                         | unknown protein                                         |
| 70195 |   |   |   |   |   |   |   | 1.016<br>down  | 2.210 up                                | unknown protein                                         |
| 70197 |   |   |   |   |   |   |   | 46.788<br>down | 2.467<br>down                           | Zn-dependent β-lactamase                                |
| 70201 |   |   |   |   |   |   |   |                |                                         | GCN5-related acetyltransferase                          |
| 70204 | + |   | + |   |   |   |   |                |                                         | unknown protein                                         |
| 70218 |   | + | + | + | + | + | + |                |                                         | unknown protein                                         |
| 70223 |   | + | + | + | + | + | + |                |                                         | unknown protein                                         |
| 70251 |   | + | + | + | + | + | + |                |                                         | vacuolar protein-sorting machinery class E protein HSE1 |
| 70266 |   | + | + | + | + | + | + |                |                                         | CDC2_AJECA Cell division control protein 2              |
| 70305 |   | + | + | + | + | + | + |                |                                         | Translation release factor eRF3 in other fungi.         |
| 70310 |   |   | + |   |   |   |   |                |                                         | unknown protein                                         |

|       |  |  |  |  |  |  |  |  |  |  |   |                                                                                    |
|-------|--|--|--|--|--|--|--|--|--|--|---|------------------------------------------------------------------------------------|
| 70311 |  |  |  |  |  |  |  |  |  |  | + | flavoprotein monooxygenase                                                         |
| 70316 |  |  |  |  |  |  |  |  |  |  |   | NAD-dependent epimerase/dehydratase family                                         |
| 70319 |  |  |  |  |  |  |  |  |  |  |   | MFS permease                                                                       |
| 70323 |  |  |  |  |  |  |  |  |  |  |   | MFS monocarboxylic acid transporter. putative                                      |
| 70327 |  |  |  |  |  |  |  |  |  |  |   | 1.369 up 3.210 up unknown protein                                                  |
| 70329 |  |  |  |  |  |  |  |  |  |  |   | + + + unknown protein                                                              |
| 70334 |  |  |  |  |  |  |  |  |  |  |   | 2.761 down 8.772 down short chain dehydrogenase/reductase                          |
| 70339 |  |  |  |  |  |  |  |  |  |  |   | 1.120 down 2.200 up cytochrome P450 monooxygenase (trichothecene C-15 hydroxylase) |
| 70341 |  |  |  |  |  |  |  |  |  |  |   | GH75 chitinase                                                                     |
| 70349 |  |  |  |  |  |  |  |  |  |  |   | 3.978 down 8.651 down MFS permease LIZ1                                            |
| 70351 |  |  |  |  |  |  |  |  |  |  |   | + Zn2Cys6 transcriptional regulator                                                |
| 70355 |  |  |  |  |  |  |  |  |  |  |   | + + + SAM-dependent methyltransferase                                              |
| 70365 |  |  |  |  |  |  |  |  |  |  |   | 16.042 down 10.414 down unknown protein                                            |
| 70373 |  |  |  |  |  |  |  |  |  |  |   | 1.837 down 6.019 down unknown protein                                              |
| 70375 |  |  |  |  |  |  |  |  |  |  |   | 3.347 down 12.561 down amidase                                                     |
| 70377 |  |  |  |  |  |  |  |  |  |  |   | unknown protein                                                                    |
| 70383 |  |  |  |  |  |  |  |  |  |  |   | 1.814 down 4.805 down succinate semialdehyde dehydrogenase. NADP                   |
| 70397 |  |  |  |  |  |  |  |  |  |  |   | alanyl-transfer RNA synthetase.                                                    |
| 70400 |  |  |  |  |  |  |  |  |  |  |   | 1.135 up 3.069 up unknown protein                                                  |
| 70414 |  |  |  |  |  |  |  |  |  |  |   | 1.160 down 3.363 down Zn2Cys6 transcriptional regulator                            |
| 70429 |  |  |  |  |  |  |  |  |  |  |   | Short-chain dehydrogenase/reductase                                                |
| 70439 |  |  |  |  |  |  |  |  |  |  |   | + + + + + NADH-ubiquinone oxidoreductase                                           |
| 70452 |  |  |  |  |  |  |  |  |  |  |   | flavin containing amine oxidoreductase                                             |

|       |   |   |   |   |   |   |                |                |                                                                 |
|-------|---|---|---|---|---|---|----------------|----------------|-----------------------------------------------------------------|
| 70488 |   | + | + |   |   |   |                |                | unknown protein                                                 |
| 70491 |   |   |   |   |   |   | 70.700<br>down | 2.492<br>down  | esterase/lipase                                                 |
| 70500 |   |   |   |   |   |   |                |                | unknown protein. 6TM                                            |
| 70511 | + | + | + | + | + | + |                |                | peroxisomal carrier protein                                     |
| 70517 | + | + | + | + | + | + |                |                | Forkhead                                                        |
| 70520 |   |   |   |   |   |   |                |                | short chain dehydrogenase/reductase                             |
| 70527 |   |   |   |   |   |   |                |                | lysophospholipase                                               |
| 70532 | + | + | + | + | + | + |                |                | acyltransferase. putative                                       |
| 70542 |   |   |   |   |   |   |                |                | $\beta$ -glycosidase (endo-beta-1.3(4)- $\beta$ -D-glucanase)   |
| 70546 | + | + | + | + | + | + |                |                | Poly(A) polymerase. RNA-binding region                          |
| 70547 | + | + | + |   |   |   |                |                | Zn2Cys6 transcriptional regulator                               |
| 70548 | + | + | + | + | + | + |                |                | Guanine nucleotide exchange factor for Ras-likeGTPases (RasGEF) |
| 70560 | + | + | + | + | + | + |                |                | Calpain-like protease palB/rim-13. putative                     |
| 70570 |   |   |   |   |   |   | 1.047 up       | 3.243<br>down  | Zn2Cys6 transcriptional regulator                               |
| 70577 | + | + | + | + | + | + |                |                | C2H2 transcriptional regulator                                  |
| 70599 |   |   |   |   |   |   | 1.258 up       | 2.636 up       | unknown protein                                                 |
| 70600 |   |   |   |   |   |   | 17.584<br>down | 7.834<br>down  | catalase. large subunit type                                    |
| 70608 |   |   |   |   |   |   | 32.737<br>down | 13.100<br>down | unknown protein. HHE domains                                    |
| 70630 |   |   |   |   |   |   | 1.033<br>down  | 2.060<br>down  | homoserine acetyltransferase family protein                     |
| 70631 |   |   |   |   |   |   | 1.175<br>down  | 2.285 up       | dipeptidyl peptidase 5                                          |
| 70639 |   |   |   |   |   |   |                |                | unknown protein with WD repeats                                 |
| 70644 |   |   |   |   |   |   |                |                | Flippase                                                        |
| 70646 |   |   |   |   |   |   |                |                | CCD1                                                            |
| 70703 | + | + | + | + | + | + |                |                | CDP-alcohol phosphatidyltransferase                             |
| 70736 | + | + | + | + | + | + |                |                | Arv1-like family protein                                        |

|       |   |   |   |   |   |   |   |   |               |               |                                              |
|-------|---|---|---|---|---|---|---|---|---------------|---------------|----------------------------------------------|
| 70750 |   |   | + | + | + | + | + | + |               |               | ATP synthase subunit H. putative             |
| 70772 |   |   | + | + | + | + | + | + |               |               | GPI inositol deacylase of the ER Bst1        |
| 70778 | + | + |   |   | + |   |   |   |               |               | DNA mismatch repair protein PMS1             |
| 70795 |   |   | + | + | + | + | + | + |               |               | translation factor eIF2                      |
| 70800 |   |   |   |   | + |   |   |   |               |               | elastinolytic metalloproteinase              |
| 70803 |   |   |   |   |   |   |   |   | 2.003<br>down | 4.754 up      | bifunctional catalase/peroxidase             |
| 70806 |   |   |   |   |   |   |   |   |               |               | SSCRP                                        |
| 70807 |   |   |   |   |   |   |   |   |               |               | unknown protein                              |
| 70808 |   |   |   |   |   |   |   |   |               |               | unknown protein                              |
| 70811 |   |   | + | + | + | + | + | + |               |               | cell division control protein Cdc4. putative |
| 70816 |   |   |   |   |   |   |   |   |               |               | Asparaginase_                                |
| 70823 |   |   | + | + | + | + | + | + |               |               | GPI transamidase component GPI16             |
| 70829 |   |   |   |   |   |   |   |   | 1.944<br>down | 6.140<br>down | MFS multidrug transporter. putative          |
| 70830 |   |   |   |   |   |   |   |   | 1.280 up      | 2.310<br>down | MFS permease                                 |
| 70837 |   |   |   |   |   |   |   |   | 1.519 up      | 2.084 up      | E3 ubiquitin ligase                          |
| 70838 |   |   |   |   |   |   |   |   |               |               | unknown protein                              |
| 70840 |   |   | + | + | + | + | + | + |               |               | SSCRP                                        |
| 70842 |   |   |   |   |   |   |   |   | 2.181<br>down | 5.192<br>down | Cytochrome P450 CYP2 subfamily               |
| 70845 |   |   |   |   |   |   |   |   | 3.171 up      | 5.855 up      | GH55 $\beta$ -1.3-glucanase                  |
| 70847 | + | + | + |   |   |   |   |   |               |               | unknown protein                              |
| 70855 |   |   |   |   |   |   |   |   | 1.629 up      | 2.052 up      | unknown protein                              |
| 70859 |   |   | + |   | + | + |   | + | 4.320<br>down | 5.344<br>down | amidase                                      |
| 70860 |   |   |   |   |   |   |   |   |               |               | allantoate permease. 10 TM domains           |
| 70861 |   |   |   |   | + |   |   |   |               |               | unknown protein                              |
| 70875 |   |   | + | + | + | + | + | + |               |               | serine/threonine-protein kinase              |



|       |   |   |   |   |   |   |   |   |   |               |                |                                                                         |
|-------|---|---|---|---|---|---|---|---|---|---------------|----------------|-------------------------------------------------------------------------|
| 70894 |   |   |   |   |   |   |   |   |   | 5.560<br>down | 3.395<br>down  | unknown protein                                                         |
| 70907 |   |   |   |   |   |   |   |   |   | 3.594 up      | 4.621 up       | Ankyrin                                                                 |
| 70910 |   |   |   |   |   |   |   |   |   | 2.008<br>down | 11.340<br>down | GMC oxidoreductase                                                      |
| 70912 |   |   |   |   |   |   |   |   |   |               |                | short chain dehydrogenase/reductase                                     |
| 70918 |   |   |   |   |   |   |   |   |   | 1.053<br>down | 8.118 up       | unknown protein                                                         |
| 70919 |   |   |   |   |   |   |   |   |   | 3.550 up      | 3.373 up       | SSCRP                                                                   |
| 70921 |   |   |   |   |   |   |   |   |   | 1.347<br>down | 3.785 up       | unknown protein                                                         |
| 70922 |   |   |   |   |   |   |   |   |   |               |                | unknown protein                                                         |
| 70923 |   |   |   |   |   |   |   |   |   | 1.543 up      | 2.682<br>down  | unknown protein. only in fungi                                          |
| 70927 |   |   |   |   |   |   |   |   |   | 1.116 up      | 3.319 up       | unknown protein                                                         |
| 70932 |   |   |   |   |   |   |   |   |   | 1.280<br>down | 2.064<br>down  | MFS permease                                                            |
| 70933 |   |   |   |   |   |   |   |   |   |               |                | MFS permease                                                            |
| 70934 | + | + | + |   |   |   |   |   |   |               |                | oligopeptide transporter                                                |
| 70943 |   |   |   | + | + | + | + | + | + | 1.137<br>down | 2.022<br>down  | Histidine kinase. part of a two component signal transduction system    |
| 70949 |   |   |   |   |   |   |   |   |   |               |                | Thiamine pyrophosphate-requiring enzyme / benzoyl formate decarboxylase |
| 70956 |   |   |   |   |   |   |   |   |   | 4.615<br>down | 3.284<br>down  | cytochrome P450 monooxygenase                                           |
| 70960 |   |   |   |   |   |   |   |   |   |               |                | ADA. Adenosine deaminase                                                |
| 70961 |   |   |   |   |   |   |   |   |   | 2.050<br>down | 2.579<br>down  | dienelactone hydrolase                                                  |
| 70962 |   |   |   |   |   |   |   |   |   | 1.001 up      | 4.010 up       | tripeptide peptidase                                                    |
| 70967 |   |   |   |   |   |   |   |   |   |               |                | unknown protein                                                         |
| 70972 |   |   |   |   |   |   |   |   |   |               |                | unique protein                                                          |
| 70973 | + | + | + |   |   |   |   |   |   | 1.142<br>down | 2.000 up       | 4-aminobutyrate aminotransferase                                        |

|       |   |   |  |   |   |   |   |            |            |          |                                                                   |                                  |
|-------|---|---|--|---|---|---|---|------------|------------|----------|-------------------------------------------------------------------|----------------------------------|
| 70984 |   |   |  |   |   |   |   |            |            |          | cytochrome P450 protein. class I                                  |                                  |
| 70988 |   |   |  |   |   |   |   |            |            |          | Flavin-containing monooxygenase                                   |                                  |
| 70991 |   |   |  |   |   |   |   | 4.481 up   | 3.539 up   |          | unknown protein. ThiJ/Pfpl domain                                 |                                  |
| 70994 |   |   |  |   |   |   |   |            |            |          | dipeptidyl peptidase 5                                            |                                  |
| 70996 |   |   |  |   |   |   |   | 1.238 up   | 2.219 up   |          | SSCRP                                                             |                                  |
| 70998 |   |   |  |   |   |   |   |            |            |          | Amino acid transporters                                           |                                  |
| 71005 |   |   |  |   |   |   |   |            |            |          | NRPS                                                              |                                  |
| 71008 |   |   |  |   |   |   |   |            |            |          | siderophore transporter                                           |                                  |
| 71010 |   |   |  |   |   |   |   | 2.126 down | 4.473 down |          | MDR-type ABC transporters                                         |                                  |
| 71019 |   |   |  | + | + | + | + | +          | +          |          | unknown protein                                                   |                                  |
| 71021 |   |   |  | + | + | + | + | +          | +          |          | bem46 family protein                                              |                                  |
| 71029 | + | + |  | + | + | + | + | +          | +          | 3.606 up | 9.178 up                                                          | Ctr copper transporter. putative |
| 71034 |   |   |  |   |   |   |   |            |            |          | unknown protein                                                   |                                  |
| 71037 |   |   |  | + | + | + | + | +          | +          |          | nonselective cation channel. putative                             |                                  |
| 71039 |   |   |  |   |   |   |   |            |            |          | -HAO-hydroxyanthranilic acid dioxygenase                          |                                  |
| 71050 |   |   |  |   |   |   |   |            |            |          | SAM-dependent methyltransferase MTQ2                              |                                  |
| 71059 |   |   |  |   |   |   |   | 1.410 down | 2.224 down |          | MFS permease                                                      |                                  |
| 71071 |   |   |  |   |   |   |   |            |            |          | unknown protein. only in Gibberella. A. fumigatus and A. nidulans |                                  |
| 71072 |   |   |  |   |   |   |   | 4.958 down | 3.818 down |          | Gluconate kinase                                                  |                                  |
| 71076 |   |   |  |   |   |   |   | 1.093 up   | 3.337 up   |          | estrerase/lipase                                                  |                                  |
| 71077 |   |   |  |   |   |   |   |            |            |          | unknown protein                                                   |                                  |
| 71078 |   |   |  |   |   |   |   | 1.038 up   | 3.064 up   |          | Ca/CaM-dependent kinase-1                                         |                                  |
| 71080 |   |   |  |   |   |   |   | 1.325 down | 3.746 down |          | Zn2Cys6 transcriptional regulator                                 |                                  |
| 71092 |   |   |  |   |   |   |   | 2.724 up   | 5.525 up   |          | phytase                                                           |                                  |
| 71094 |   |   |  |   |   |   |   | 4.531 up   | 2.569 down |          | Intradiol ring-cleavage dioxygenase                               |                                  |
| 71095 |   |   |  |   |   |   |   | 1.300 up   | 3.922 up   |          | Aldehyde dehydrogenase                                            |                                  |

|       |   |   |   |   |   |   |   |   |  |            |          |                                                                                   |
|-------|---|---|---|---|---|---|---|---|--|------------|----------|-----------------------------------------------------------------------------------|
| 71101 |   |   |   |   |   |   |   |   |  | 1.010 up   | 5.575 up | enoyl-CoA hydratase/isomerase                                                     |
| 71103 |   |   |   |   |   |   |   |   |  | 1.281 up   | 3.159 up | dynamain GTPase. putative                                                         |
| 71117 |   |   | + | + | + | + | + | + |  |            |          | a-glycosyltransferases                                                            |
| 71119 |   |   | + | + | + | + | + | + |  |            |          | capsule polysaccharide biosynthesis protein. putative                             |
| 71123 |   |   |   |   |   |   |   |   |  | 1.810 up   | 8.852 up | unknown protein                                                                   |
| 71125 | + |   |   |   |   |   |   |   |  | 1.057 up   | 3.678 up | unknown protein                                                                   |
| 71126 |   | + |   |   |   |   |   |   |  |            |          |                                                                                   |
| 71146 | + |   | + | + |   |   | + |   |  | 1.114 up   | 3.012 up | unknown protein                                                                   |
| 71154 | + |   | + | + |   |   | + |   |  | 1.158 up   | 2.392 up | unknown protein                                                                   |
| 71166 |   |   |   |   |   |   |   |   |  | 1.061 up   | 5.009 up | unknown protein                                                                   |
| 71167 | + |   |   | + |   |   | + |   |  | 1.202 down | 3.268 up | SSCRP                                                                             |
| 71170 | + | + | + |   |   |   |   |   |  |            |          | unknown protein. only in Gibberella                                               |
| 71173 | + | + | + |   |   |   |   |   |  | 1.536 up   | 3.313 up | unknown protein                                                                   |
| 71177 | + |   | + | + |   |   | + |   |  |            |          | unique protein                                                                    |
| 71180 | + |   | + | + |   |   | + |   |  | 1.436 up   | 3.483 up | unknown protein                                                                   |
| 71259 |   |   | + | + | + | + | + | + |  |            |          | triacylglycerol lipase                                                            |
| 71284 |   |   |   |   |   |   |   |   |  |            |          | unknown protein                                                                   |
| 71304 |   |   | + | + | + | + | + | + |  |            |          | ribosomal protein L39 from yeast and fungal species.                              |
| 71315 |   |   | + | + | + | + | + | + |  |            |          | protein kinase. related to <i>S. cerevisiae</i> Cla4p. a member of the PAK family |
| 71326 |   |   |   |   |   |   |   |   |  |            |          | Esterase;too long in N-term; 214 was better                                       |
| 71343 |   |   | + | + | + | + | + | + |  |            |          | cytochrome oxidase c subunit VIb                                                  |
| 71344 |   |   | + | + | + | + | + | + |  |            |          | unknown protein                                                                   |
| 71363 |   |   | + | + | + | + | + | + |  |            |          | translation elongation factor 3-like protein                                      |
| 71371 |   |   | + | + | + | + | + | + |  |            |          | Acetyltransf_Acetyltransferase (GNAT) family                                      |
| 71374 |   |   | + | + | + | + | + | + |  |            |          | Membrane coat complex Retromer. subunit Vps35                                     |
| 71380 |   |   | + | + | + | + | + | + |  |            |          | HMG-CoA reductase.                                                                |
| 71390 |   |   |   |   |   |   |   |   |  | 1.059 up   | 2.255 up | MRSP1/expansin-like                                                               |
| 71394 |   |   |   |   |   |   |   |   |  |            |          | GH79 $\beta$ -glucuronidase                                                       |

|       |   |   |   |   |   |   |                |               |                                                                                         |
|-------|---|---|---|---|---|---|----------------|---------------|-----------------------------------------------------------------------------------------|
| 71399 |   |   |   |   |   |   | 2.328<br>down  | 2.149<br>down | endo-1.3-β-glucanase                                                                    |
| 71410 | + | + | + | + | + | + |                |               | translation initiation factor eIF4-gamma/eIF5/eIF2-epsilon.                             |
| 71441 | + | + | + | + | + | + |                |               | unknown protein                                                                         |
| 71468 | + | + | + | + | + | + |                |               | replication factor A. large subunit                                                     |
| 71496 |   |   |   |   |   |   |                |               | Zinc-binding dehydrogenase                                                              |
| 71532 |   |   |   |   |   |   | 13.909<br>down | 3.294<br>down | GH71 α-1 3-glucanase                                                                    |
| 71554 |   |   |   |   |   |   | 1.084<br>down  | 3.111 up      | GH5 β-1.3-mannanase/endo-β-1.4-mannosidase                                              |
| 71556 |   |   |   |   |   |   | 3.190<br>down  | 3.546<br>down | unknown protein                                                                         |
| 71559 | + | + | + | + | + | + |                |               | Translation initiation factor eIF-5A gene based on homologyToThe corresponding genes in |
| 71563 | + | + | + | + | + | + |                |               | Chitin synthase                                                                         |
| 71566 |   |   | + |   |   |   |                |               | phytase                                                                                 |
| 71649 |   |   |   |   |   |   |                |               | tRNA-dihydrouridine synthase.                                                           |
| 71655 | + | + | + | + | + | + |                |               | sterol delta(24(28))- reductase.                                                        |
| 71676 | + | + | + | + |   | + |                |               | ureidoglycolate hydrolase                                                               |
| 71689 |   | + |   |   |   |   |                |               | Zn2Cys6 transcriptional regulator                                                       |
| 71759 | + | + | + | + | + | + |                |               | tyrosyl-tRNA synthetase. class Ib.                                                      |
| 71783 | + | + | + | + | + | + |                |               | Aspartyl-tRNA synthetases                                                               |
| 71791 | + | + | + | + | + | + |                |               | UTP14. encoding a component of the SSU processome                                       |
| 71817 |   |   |   |   |   |   |                |               | unknown protein                                                                         |
| 71823 |   |   |   |   |   |   |                |               | Zn2Cys6 transcriptional regulator                                                       |
| 71970 | + | + | + | + | + | + |                |               | phosphatidylinositol-specific phospholipase C. Y domain. putative                       |
| 71994 | + | + | + | + | + | + |                |               | Ubiquitin-conjugating enzyme Ubc1                                                       |
| 72012 | + | + | + | + | + | + |                |               | GT8 glycogenin                                                                          |
| 72042 | + | + | + | + | + | + |                |               | unknown protein                                                                         |
| 72057 |   |   | + |   |   |   |                |               | Zn2Cys6 transcriptional regulator                                                       |
| 72071 |   |   |   |   |   |   | 1.184 up       | 3.438 up      | Carbohydrate-Binding Module Family 13                                                   |

|       |   |   |   |   |   |   |                |               |                                                 |
|-------|---|---|---|---|---|---|----------------|---------------|-------------------------------------------------|
| 72072 |   |   |   |   |   |   | 3.402<br>down  | 2.039<br>down | CE1 esterase (PHB?)                             |
| 72076 |   |   |   |   |   |   |                |               | Zn2Cys6 transcriptional regulator               |
| 72086 |   |   |   |   |   |   |                |               | Vacuolar carboxypeptidase Cps1                  |
| 72091 |   |   |   |   |   |   |                |               | unknown protein                                 |
| 72108 | + | + | + |   |   |   |                |               | DNA repair protein                              |
| 72137 | + | + | + | + |   |   |                |               | cytoskeleton binding protein                    |
| 72158 | + | + | + | + | + | + |                |               | Rad9                                            |
| 72183 |   |   |   |   |   |   | 3.161 up       | 2.115<br>down | SSCRP                                           |
| 72231 | + | + | + | + | + | + |                |               | unique protein                                  |
| 72259 | + | + | + | + |   |   |                |               | RgsA. regulator of G-protein signaling          |
| 72287 | + | + | + | + | + | + |                |               | tRNA (uracil-5-)-methyltransferase/TrmA.        |
| 72321 |   |   |   |   |   |   |                |               | subtilisin-like serine protease                 |
| 72339 |   | + |   |   |   | + |                |               | GH18. chitinase CHI18-9                         |
| 72379 | + | + | + |   |   |   |                |               | conidiospore surface protein cmp1               |
| 72383 | + | + | + | + | + | + |                |               | galactose permease                              |
| 72408 |   |   |   |   |   |   |                |               | kinesin-like protein                            |
| 72459 | + | + | + | + | + | + |                |               | Phosphatidylinositol-4-phosphate 5-kinase. mss4 |
| 72488 | + |   | + |   |   |   | 1.527 up       | 2.387<br>down | GH95 $\alpha$ -L-fucosidase                     |
| 72521 | + | + | + | + | + | + |                |               | transcription elongation factor SPT4            |
| 72524 |   |   |   |   |   |   |                |               | bZIP transcription factor                       |
| 72526 |   |   |   |   |   |   |                |               | GH67 $\alpha$ -Glucuronidase GLR1               |
| 72549 |   |   |   |   |   |   |                |               | phenylacrylic acid decarbounknown proteinlase   |
| 72567 |   |   | + |   |   |   | 15.565<br>down | 4.797 up      | GH6 Cellobiohydrolase CEL6A/CBH2                |
| 72568 |   |   |   |   |   |   |                |               | GH79 $\beta$ -glucuronidase                     |
| 72581 |   |   |   |   |   |   | 2.158<br>down  | 5.960 up      | unknown protein                                 |

|       |   |   |   |  |  |  |                |                |                                                   |
|-------|---|---|---|--|--|--|----------------|----------------|---------------------------------------------------|
| 72602 |   |   |   |  |  |  | 1.905<br>down  | 2.632<br>down  | ribosomal protein P2.                             |
| 72605 |   |   |   |  |  |  | 1.190<br>down  | 2.628 up       | GPCR. secretin like                               |
| 72606 |   |   |   |  |  |  |                |                | ubiquitin-activating enzyme UBA1                  |
| 72611 |   |   |   |  |  |  | 1.386<br>down  | 5.511<br>down  | Zn2Cys6 transcriptional regulator                 |
| 72612 |   |   |   |  |  |  | 2.100<br>down  | 3.496<br>down  | acetylnithine deacetylase                         |
| 72615 |   |   |   |  |  |  |                |                | LysU Lysyl-tRNA synthetase (class II)             |
| 72632 |   |   |   |  |  |  | 5.777<br>down  | 12.000<br>down | GH27 $\alpha$ -galactosidase AGL1                 |
| 72643 |   |   |   |  |  |  |                |                | arginosuccinate synthetase                        |
| 72661 |   |   |   |  |  |  |                |                | unknown protein                                   |
| 72685 |   |   |   |  |  |  |                |                | 6-phosphogluconate dehydrogenase. decarboxylating |
| 72694 |   |   |   |  |  |  |                |                | transferase hexapeptide domain protein            |
| 72704 |   |   |   |  |  |  |                |                | GH27 $\alpha$ -galactosidase AGL3                 |
| 72780 | + | + | + |  |  |  |                |                | bZIP transcription factor                         |
| 72788 |   |   |   |  |  |  |                |                | GT 31 glycosyltransferase                         |
| 72796 |   |   |   |  |  |  |                |                | unknown protein with Nif domain                   |
| 72800 |   |   |   |  |  |  |                |                | unknown protein                                   |
| 72859 |   |   |   |  |  |  |                |                | unknown protein UPF0023                           |
| 72896 |   |   |   |  |  |  | 1.277 up       | 2.294 up       | Dolichol-phosphate (beta-D) mannosyltransferase 2 |
| 72907 |   |   |   |  |  |  | 1.083<br>down  | 3.047<br>down  | unknown protein with WSC domain                   |
| 72918 |   |   |   |  |  |  |                |                | ribosomal protein L19                             |
| 72922 |   |   |   |  |  |  | 10.758<br>down | 7.407<br>down  | amino acid permease (GABA)                        |
| 72941 |   |   |   |  |  |  |                |                | unknown protein                                   |
| 72993 |   |   |   |  |  |  |                |                | Zn2Cys6 transcriptional regulator                 |
| 73005 |   |   |   |  |  |  | 1.061 up       | 3.560 up       | GH79 $\beta$ -glucuronidase                       |

|       |   |  |   |   |   |   |   |   |            |            |                                                                                        |
|-------|---|--|---|---|---|---|---|---|------------|------------|----------------------------------------------------------------------------------------|
| 73016 |   |  |   |   |   |   |   |   | 1.132 up   | 5.225 up   | aryl-alcohol oxidase                                                                   |
| 73023 |   |  |   |   |   |   |   |   | 1.013 up   | 2.949 up   | unknown protein                                                                        |
| 73024 |   |  |   |   |   |   |   |   | 1.673 up   | 5.217 up   | unknown protein                                                                        |
| 73039 |   |  |   |   |   |   |   |   | 1.333 down | 3.926 down | APHPosphotransferase enzyme family aligned                                             |
| 73048 |   |  |   | + | + |   |   |   | 1.975 up   | 2.846 up   | unknown protein                                                                        |
| 73101 |   |  |   |   |   |   |   |   | 1.099 down | 2.796 up   | glucan endo-1.3-1.4-β-D-glucosidase                                                    |
| 73102 |   |  |   |   |   |   |   |   | 1.966 down | 2.636 down | GH39 β-xylosidase                                                                      |
| 73103 | + |  |   |   |   |   |   |   | 1.100 up   | 2.797 up   | ribosomal protein P2.                                                                  |
| 73104 |   |  |   |   |   |   |   |   | 1.576 down | 2.634 down | Zn2Cys6 transcriptional regulator                                                      |
| 73110 | + |  | + |   |   |   |   |   |            |            | Acetyltransf_Acetyltransferase (GNAT) family                                           |
| 73119 |   |  |   |   |   |   |   |   | 1.119 up   | 3.672 up   | unknown protein                                                                        |
| 73134 |   |  |   |   |   |   |   |   |            |            | GT20 trehalose-6-phosphate synthase/trehalose phosphatase                              |
| 73173 |   |  |   |   |   |   |   |   | 1.500 up   | 3.381 up   | HFB1                                                                                   |
| 73179 |   |  |   |   |   |   |   |   | 3.182 up   | 3.464 up   | GH71 α-1 3-glucanase                                                                   |
| 73190 |   |  |   | + | + | + |   |   |            |            | Rev3p of Saccharomyces cerevisiae. the catalytic subunit of DNA polymerase zeta. a DNA |
| 73231 |   |  |   | + | + | + | + | + |            |            | ribosomal protein L34.                                                                 |
| 73248 |   |  |   |   |   |   |   |   | 2.266 down | 2.413 down | GH55 exo-1.3-β-glucanase                                                               |
| 73250 |   |  |   |   |   |   |   |   | 1.239 down | 8.723 up   | Urea transporter                                                                       |
| 73256 |   |  |   |   |   |   |   |   |            |            | GH81 endo-1.3-β-glucanase                                                              |
| 73344 |   |  |   |   |   |   |   |   | 1.136 up   | 3.532 up   | Cytochrome P450 CYP3/CYP5/CYP6/CYP9 subfamilies                                        |
| 73417 |   |  |   | + | + | + | + | + | 1.432 down | 2.331 down | bZIP transcriptional regulator MeaB                                                    |
| 73501 |   |  |   | + | + | + | + | + |            |            | unknown protein                                                                        |
| 73504 |   |  |   |   | + |   |   |   |            |            | unknown protein                                                                        |
| 73516 |   |  |   | + | + | + | + | + | 1.590 down | 2.049 down | Grg1 Glucose repressible protein                                                       |

|       |   |   |   |   |   |   |             |           |                                                                 |
|-------|---|---|---|---|---|---|-------------|-----------|-----------------------------------------------------------------|
| 73517 | + | + | + | + | + | + |             |           | unknown protein                                                 |
| 73519 | + | + | + | + | + | + |             |           | unknown protein. 4 TM                                           |
| 73523 | + | + | + |   |   |   |             |           | unknown protein with WSC domains                                |
| 73525 | + | + | + | + | + | + |             |           | importin β KapE                                                 |
| 73536 |   |   | + |   |   |   | 1.012 up    | 10.116 up | NADP-glutamate dehydrogenase                                    |
| 73539 | + | + | + | + | + | + |             |           | unknown protein                                                 |
| 73559 | + | + | + |   |   |   |             |           | Zn2Cys6 transcriptional regulator                               |
| 73560 | + | + | + | + | + | + |             |           | UTP20. snoRNA-binding protein and member of the SSU processome. |
| 73564 | + | + | + | + | + | + |             |           | 20S proteasome alpha-type subunit Pre10                         |
| 73570 | + | + | + | + | + | + |             |           | unknown protein                                                 |
| 73571 | + | + | + | + | + | + |             |           | Cytochrome c1. heme protein. mitochondrial                      |
| 73574 | + | + | + | + | + | + |             |           | 19S regulatory particle ATPase Rpt1                             |
| 73580 | + | + | + |   |   | + |             |           | unknown protein                                                 |
| 73587 |   |   | + |   |   |   |             |           | unknown protein                                                 |
| 73594 |   |   |   |   |   |   | 1.712 up    | 2.329 up  | unknown protein                                                 |
| 73604 | + | + | + | + | + | + |             |           | phytase                                                         |
| 73618 |   |   |   |   |   |   |             |           | PKS                                                             |
| 73621 |   |   |   |   |   |   |             |           | PKS                                                             |
| 73623 |   |   |   |   |   |   | 1.317 down  | 2.574 up  | flavoprotein monooxygenase                                      |
| 73631 |   |   |   |   |   |   |             |           | isoamyl alcohol oxidase                                         |
| 73632 |   |   |   |   |   |   | 6.821 down  | 15.028 up | CE5 acetyl xylan esterase AXE1                                  |
| 73638 |   |   | + |   |   |   | 16.794 down | 24.546 up | CIP1                                                            |
| 73643 |   |   |   |   |   |   | 25.659 down | 22.910 up | GH61 polysaccharide monooxygenase CEL61a                        |
| 73646 | + | + | + | + | + | + |             |           | DNA replication licensing factor mcm4                           |
| 73647 | + | + | + | + | + | + |             |           | Vesicle coat complex COPI. epsilon subunit                      |
| 73654 |   |   | + |   |   |   |             |           | BZIP transcriptional regulator                                  |
| 73665 | + | + | + |   |   |   |             |           | hexokinase                                                      |



|       |   |   |   |   |   |   |            |            |                                                                                     |
|-------|---|---|---|---|---|---|------------|------------|-------------------------------------------------------------------------------------|
| 73678 | + | + | + | + | + | + |            |            | calnexin. high identity with <i>A. niger</i> clxA                                   |
| 73689 | + | + | + | + | + | + |            |            | C2H2 transcriptional regulator                                                      |
| 73690 | + | + | + | + | + | + |            |            | Cytosolic Fe-S cluster assembly factor NAR1. putative                               |
| 73697 | + | + | + | + | + | + |            |            | unknown protein                                                                     |
| 73706 | + | + | + | + | + | + |            |            | unknown protein                                                                     |
| 73708 | + | + | + | + | + | + |            |            | unknown protein                                                                     |
| 73722 |   | + |   |   |   |   |            |            | unknown protein                                                                     |
| 73733 | + | + | + | + | + | + |            |            | unknown protein                                                                     |
| 73749 | + | + | + | + | + | + |            |            | unknown protein                                                                     |
| 73760 | + | + | + | + | + | + |            |            | unknown protein                                                                     |
| 73764 | + | + | + | + | + | + |            |            | nucleoside transporter                                                              |
| 73765 | + | + | + | + | + | + |            |            | unknown protein                                                                     |
| 73769 | + | + | + | + |   |   |            |            | Unknown protein with WD40 repeats and a LisH domain which mediation protein dimeris |
| 73774 | + | + | + | + |   | + |            |            | acetyl-CoA synthase                                                                 |
| 73778 | + | + | + | + | + | + |            |            | Rfc5p of <i>Saccharomyces cerevisiae</i> .                                          |
| 73783 | + | + | + | + | + | + | 1.032 up   | 2.759 up   | mitochondrial co-chaperone GrpE . putative                                          |
| 73790 | + | + | + | + | + | + |            |            | Mitochondrial ATP synthase epsilon chain domain-containing. putative                |
| 73792 | + | + | + |   |   |   | 1.145 up   | 2.298 down | Zn2Cys6 transcriptional regulator                                                   |
| 73809 | + | + | + | + | + | + |            |            | metallopeptidase. Ste23                                                             |
| 73815 | + | + | + | + | + | + | 1.436 down | 2.114 down | unknown protein                                                                     |
| 73818 |   |   |   |   |   |   |            |            | Catalase                                                                            |
| 73823 | + | + | + | + | + | + |            |            | SCF complex subunit Skp1                                                            |
| 73829 |   |   |   |   |   |   |            |            | unknown protein                                                                     |
| 73832 | + | + | + | + | + | + |            |            | transcription factor SipA3                                                          |
| 73837 | + | + | + | + | + | + |            |            | Peptide chain release factor eRF/aRF subunit 1 (eRF1).                              |
| 73840 | + | + | + | + | + | + |            |            | unknown protein                                                                     |
| 73842 | + | + | + | + | + | + |            |            | adenosine_kinase                                                                    |
| 73846 | + | + | + | + | + | + |            |            | NADH-ubiquinone oxidoreductase Complex1 subunit                                     |

|       |   |   |   |   |   |   |            |            |                                                              |
|-------|---|---|---|---|---|---|------------|------------|--------------------------------------------------------------|
| 73853 | + | + | + | + | + | + |            |            | NADH-cytochrome b5 reductase                                 |
| 73862 | + | + | + | + | + | + |            |            | methionine aminopeptidase                                    |
| 73873 |   | + |   |   |   |   |            |            | ProB Glutamate -kinase [Amino acid transport and metabolism] |
| 73876 | + | + | + | + | + | + |            |            | Mitochondrial inner membrane protease atp-23                 |
| 73881 | + | + | + | + | + | + |            |            | unknown protein                                              |
| 73895 | + | + | + | + | + | + |            |            | RNA-binding protein with KH domain                           |
| 73897 |   |   |   |   |   |   |            |            | Trypsin-like protease                                        |
| 73903 | + | + | + | + | + | + |            |            | 6-phosphogluconolactonase                                    |
| 73904 |   | + |   |   |   |   | 4.345 up   | 3.426 up   | unknown protein                                              |
| 73912 | + | + | + | + | + | + | 1.438 up   | 2.263 up   | unknown protein                                              |
| 73918 |   |   |   |   |   |   |            |            | NOL1/NOP2/sun domain protein                                 |
| 73924 |   |   |   |   |   |   | 2.517 up   | 2.535 up   | MDR-type ABC transporters                                    |
| 73933 | + | + | + | + | + | + |            |            | unknown protein                                              |
| 73934 | + | + | + | + | + | + |            |            | IlvH Acetolactate synthase small (regulatory) subunit        |
| 73937 | + | + | + |   |   |   |            |            | Ornithine carbamoyltransferase OTC/ARG3                      |
| 73940 | + | + | + | + | + | + |            |            | unknown protein                                              |
| 73961 | + | + | + | + |   | + |            |            | unknown protein                                              |
| 73963 | + | + | + | + | + | + |            |            | cytokinesis regulator. putative                              |
| 73967 | + | + | + | + | + | + |            |            | cofilin                                                      |
| 73975 | + | + | + | + | + | + |            |            | GYF domain-containing protein                                |
| 73985 | + | + | + | + | + | + |            |            | Unknown protein                                              |
| 73997 | + | + | + | + | + | + |            |            | Acyl CoA binding protein. putative                           |
| 74017 |   | + |   |   |   |   | 1.207 down | 2.458 down | unknown protein                                              |
| 74020 | + | + | + | + |   |   |            |            | Orotidine 5'-phosphate decarboxylase                         |
| 74026 | + | + | + | + | + | + |            |            | CDP-alcohol phosphatidyltransferase                          |
| 74030 | + | + | + | + | + | + |            |            | Protein phosphatase 2C                                       |
| 74041 | + | + | + | + | + | + |            |            | Aspartate/tyrosine/aromatic aminotransferase                 |
| 74047 | + | + | + | + | + | + |            |            | Ribonucleotide reductase large subunit                       |
| 74054 | + | + | + | + | + | + | 1.020 up   | 2.139 up   | Exocyst component Sec6                                       |

|       |   |   |   |   |   |   |            |            |                                                                            |
|-------|---|---|---|---|---|---|------------|------------|----------------------------------------------------------------------------|
| 74057 | + | + | + | + | + | + |            |            | Ca <sup>2+</sup> permeable channel. related to <i>N. crassa</i> NCU07605.1 |
| 74060 | + | + | + | + | + | + | 1.822 up   | 10.096 up  | SSCRP                                                                      |
| 74070 | + | + | + | + | + | + |            |            | Amino acid transporter                                                     |
| 74080 | + | + | + | + | + | + |            |            | Pantoate_ligasePantoate-beta-alanine ligase                                |
| 74086 |   |   |   |   |   |   |            |            | unknown protein                                                            |
| 74091 | + | + | + |   |   |   |            |            | Zn2Cys6 transcriptional regulator                                          |
| 74099 | + | + | + | + | + | + |            |            | unknown protein                                                            |
| 74103 |   |   |   |   |   |   |            |            | glutathione-S-transferase theta                                            |
| 74118 | + | + | + | + | + | + |            |            | unknown protein                                                            |
| 74122 | + | + | + | + | + | + |            |            | GAL1 Galactokinase                                                         |
| 74123 | + | + | + | + | + | + |            |            | acetolactate synthase                                                      |
| 74129 |   | + |   |   |   |   |            |            | unknown protein                                                            |
| 74156 |   |   |   |   |   |   |            |            | aspartyl protease                                                          |
| 74158 | + | + | + | + | + | + |            |            | ribosome biogenesis protein Ssf2. putative                                 |
| 74162 | + | + | + | + | + | + | 1.277 down | 2.200 down | Helicase. C-terminal                                                       |
| 74163 | + | + | + | + | + | + |            |            | unknown protein                                                            |
| 74168 | + | + | + | + | + | + |            |            | Dolichyl-phosphate mannosyltransferase                                     |
| 74172 |   |   |   |   |   |   |            |            | unknown protein                                                            |
| 74177 | + | + | + | + | + | + |            |            | coiled-coil domain-containing protein. putative                            |
| 74187 |   |   |   |   |   |   |            |            | AAA+-type ATPase                                                           |
| 74194 | + | + | + | + | + | + | 3.702 down | 3.064 down | mannitol dehydrogenase LXR1                                                |
| 74198 |   |   |   |   |   |   |            |            | GH92 $\alpha$ -1.2-mannosidase                                             |
| 74214 |   |   |   |   |   |   | 2.813 down | 2.706 down | unknown protein                                                            |
| 74215 |   |   |   |   |   |   | 1.792 up   | 2.347 down | RTA1-like protein. 7 TM. responds to xenobiotic stimuli                    |
| 74223 |   |   |   |   |   |   |            |            | GH11 endo- $\beta$ -1.4-xylanase XYN1                                      |
| 74228 |   |   |   |   |   |   | 2.632 up   | 2.849 up   | oleate $\delta$ -12 desaturase                                             |
| 74233 | + | + | + | + | + | + |            |            | TPA: decapping enzyme Dcp2                                                 |

|       |   |   |   |   |   |   |               |               |                                                                                           |
|-------|---|---|---|---|---|---|---------------|---------------|-------------------------------------------------------------------------------------------|
| 74235 | + | + | + | + | + | + |               |               | ribonucleotide reductase                                                                  |
| 74241 | + | + | + | + | + | + |               |               | nucleolysin TIA-1                                                                         |
| 74252 | + | + | + |   |   |   |               |               | Translation initiation factor 6 (eIF6) by homologyToThe corresponding protein in other eu |
| 74258 | + | + | + | + | + | + |               |               | beta-subunit of phenylalanyl-tRNA synthetase                                              |
| 74267 | + | + | + | + | + | + |               |               | Delta subunit. ret2. of the coatomer complex (COPI). which coats Golgi-derived transport  |
| 74278 | + | + | + | + | + | + | 2.893<br>down | 2.268<br>down | Pyridine nucleotide-disulphide oxidoreductase. class-II                                   |
| 74282 |   |   |   |   |   |   |               |               | QI74 orthologue                                                                           |
| 74289 |   |   |   |   |   |   |               |               | unknown protein                                                                           |
| 74318 | + | + | + | + | + | + |               |               | importin β KapB                                                                           |
| 74323 |   |   |   |   |   |   |               |               | unknown protein                                                                           |
| 74346 | + | + | + | + | + | + |               |               | Translation elongation factor precursor from Aspergillus fumigatus.                       |
| 74351 | + | + | + |   | + | + |               |               | Flavin-containing monooxygenase Fmo1                                                      |
| 74356 | + | + | + | + | + | + |               |               | tRNA (cytosine-5-)-methyltransferase NCL1                                                 |
| 74364 |   |   | + |   |   |   |               |               | unknown protein. 1 TM secreted                                                            |
| 74366 |   |   |   |   |   |   |               |               | nitrilase                                                                                 |
| 74374 | + | + | + | + | + | + |               |               | rRNA-processing protein FCF1                                                              |
| 74375 | + | + | + | + | + | + |               |               | nitrogen metabolite repression regulator NmrA                                             |
| 74379 |   |   |   |   |   |   | 1.175 up      | 2.035 up      | ERG2 C-8 sterol isomerase; catalyzes the isomerization of the delta-8 double bond to the  |
| 74381 | + | + | + | + | + | + |               |               | INO80 chromatin remodeling complex Ies1                                                   |
| 74386 | + | + | + | + | + | + |               |               | Vacuolar protein sorting-associated protein 68                                            |
| 74390 | + | + | + | + | + | + |               |               | unknown protein                                                                           |
| 74397 | + | + | + | + | + | + |               |               | unknown protein                                                                           |
| 74400 | + | + | + | + | + | + |               |               | glycogen synthase kinase 3                                                                |
| 74406 | + | + | + | + | + | + |               |               | unknown protein                                                                           |
| 74409 | + | + | + | + | + | + |               |               | Ribosomal protein L5 domain.                                                              |
| 74421 | + | + | + | + | + | + | 1.164 up      | 2.954 up      | unknown protein                                                                           |
| 74437 |   |   |   |   |   |   |               |               | unknown protein                                                                           |
| 74442 | + | + | + | + | + | + |               |               | unknown protein                                                                           |
| 74444 |   |   |   |   |   |   |               |               | DNA-directed RNA polymerase II                                                            |

|       |   |   |   |   |   |   |            |            |                                                                        |
|-------|---|---|---|---|---|---|------------|------------|------------------------------------------------------------------------|
| 74449 | + | + | + | + | + | + |            |            | unknown protein                                                        |
| 74453 |   | + |   |   |   |   |            |            | 3-hydroxyacyl-CoA dehydrogenase                                        |
| 74462 | + | + | + | + | + | + |            |            | Signal peptidase complex subunit Spc3                                  |
| 74476 |   |   |   |   |   |   | 1.512 up   | 2.470 down | unknown protein                                                        |
| 74477 |   |   |   |   |   |   |            |            | unknown protein                                                        |
| 74480 | + | + | + | + | + | + |            |            | UTP13. encoding a component of the SSU processome                      |
| 74486 | + | + | + | + | + | + | 1.513 up   | 2.165 up   | unknown protein                                                        |
| 74491 |   |   |   |   |   |   |            |            | unknown protein                                                        |
| 74498 | + | + | + | + | + | + |            |            | translation initiation factor 2 beta subunit (Interpro motif IF5).     |
| 74502 | + | + | + | + | + | + | 1.539 down | 2.020 down | Aldehyde dehydrogenase                                                 |
| 74505 |   | + |   |   |   |   |            |            | UDP-N-acetylglucosamine transferase subunit                            |
| 74508 | + | + | + | + | + | + |            |            | unknown protein                                                        |
| 74515 | + | + | + | + | + | + | 2.508 down | 2.449 down | unknown protein                                                        |
| 74517 | + | + | + | + | + | + |            |            | Kex1p involved in alpha factor processing                              |
| 74531 | + | + | + | + | + | + |            |            | transcriptional regulator ASM-1. involved in fruiting body development |
| 74534 | + | + | + | + | + | + |            |            | unknown protein                                                        |
| 74559 | + | + | + | + | + | + |            |            | autophagocytosis protein Aut1. putative                                |
| 74563 |   |   |   |   |   |   | 1.067 down | 3.411 down | unknown protein                                                        |
| 74568 | + | + | + | + | + | + |            |            | unknown protein                                                        |
| 74570 | + | + | + | + | + | + |            |            | unknown protein                                                        |
| 74576 | + | + | + | + | + | + | 1.033 down | 2.544 down | BZIP transcriptional regulator                                         |
| 74580 | + |   | + |   |   |   |            |            | unknown protein. 3 TM domains                                          |
| 74601 | + | + | + | + | + | + |            |            | OPT family small oligopeptide transporter                              |
| 74622 |   |   |   |   |   |   | 1.068 up   | 2.317 up   | unknown protein                                                        |
| 74624 | + | + | + | + | + | + |            |            | unknown protein                                                        |
| 74635 | + | + | + | + | + | + |            |            | unknown protein                                                        |

|       |   |   |   |   |   |   |               |               |                                                                                            |
|-------|---|---|---|---|---|---|---------------|---------------|--------------------------------------------------------------------------------------------|
| 74638 |   |   |   |   |   |   |               |               | unknown protein                                                                            |
| 74681 |   | + |   |   |   |   |               |               | unknown protein                                                                            |
| 74682 | + | + | + | + | + | + |               |               | unknown protein                                                                            |
| 74693 |   |   |   |   |   |   |               |               | leucine carboxyl methyltransferase. putative                                               |
| 74701 |   |   |   |   |   |   | 1.043<br>down | 2.336<br>down | GTP-binding protein involved in protein synthesis                                          |
| 74711 |   |   |   |   |   |   |               |               | Erg8p of <i>Saccharomyces cerevisiae</i> ; phosphomevalonate kinase                        |
| 74725 | + | + | + | + | + | + |               |               | aspartate/other aminotransferase                                                           |
| 74731 | + | + | + | + | + | + |               |               | beta-adaptin. apl1. large subunit of the adaptor protein complex (AP-2) of clathrin-coated |
| 74745 |   |   |   |   |   |   |               |               | unknown protein                                                                            |
| 74751 |   |   |   |   |   |   |               |               | unknown protein                                                                            |
| 74765 |   |   |   |   |   |   |               |               | Bromodomain containing protein                                                             |
| 74771 | + | + | + | + | + | + |               |               | unknown protein                                                                            |
| 74774 | + | + | + | + | + | + |               |               | Translation initiation factor 3. subunit g (eIF-3g); homologue of yeast TIF35.             |
| 74782 | + | + | + | + | + | + |               |               | survival factor 1                                                                          |
| 74795 | + | + | + | + | + | + |               |               | unknown protein                                                                            |
| 74797 | + | + | + | + | + | + |               |               | nuclear segregation protein (Bfr1). putative                                               |
| 74804 |   |   |   |   |   |   |               |               | Tubulin cofactor D                                                                         |
| 74807 |   |   | + |   |   |   |               |               | GH76 GPI-anchored $\alpha$ -1.6-mannanase                                                  |
| 74818 | + | + | + | + | + | + |               |               | ATP-dependent RNA helicase DBP10                                                           |
| 74848 | + | + | + | + | + | + |               |               | Rho-type GTPase-activating protein                                                         |
| 74851 |   |   |   |   |   |   |               |               | unknown protein                                                                            |
| 74854 | + | + | + | + | + | + |               |               | stearic acid desaturase Sde1                                                               |
| 74857 | + | + | + | + | + | + |               |               | unknown protein                                                                            |
| 74861 | + | + | + | + | + | + | 1.000 up      | 2.614<br>down | unknown protein                                                                            |
| 74884 | + | + | + | + | + | + |               |               | serine/threonine-protein phosphatase PP2A catalytic subunit                                |
| 74892 | + | + | + | + | + | + |               |               | ATP synthase regulation protein NCA2. putative                                             |
| 74902 | + | + | + | + | + | + |               |               | unknown protein                                                                            |
| 74907 |   |   | + |   |   | + |               |               | unknown protein                                                                            |

|       |   |   |   |   |   |   |            |            |                                                                                   |
|-------|---|---|---|---|---|---|------------|------------|-----------------------------------------------------------------------------------|
| 74913 | + | + | + | + | + | + |            |            | Histidinol-phosphate/aromatic aminotransferase and cobyrinic acid decarboxylase   |
| 74932 | + | + | + | + | + | + |            |            | unknown protein                                                                   |
| 74933 | + | + | + | + | + | + |            |            | unknown protein                                                                   |
| 74943 | + | + | + | + | + | + | 1.760 up   | 2.763 up   | Diphthine synthase                                                                |
| 74946 | + | + | + | + | + | + |            |            | unknown protein                                                                   |
| 74947 | + | + | + | + | + | + |            |            | glycosylphosphatidylinositol transamidase                                         |
| 74953 |   |   |   |   |   |   |            |            | MFS permease                                                                      |
| 74962 | + | + | + | + | + | + |            |            | unknown protein with WD40 repeats                                                 |
| 74971 | + | + | + |   | + |   | 1.002 down | 2.104 down | unknown protein                                                                   |
| 74983 | + | + | + | + | + | + |            |            | Isocitrate dehydrogenase. subunit 2. NAD-dependent. mitochondrial                 |
| 74987 | + | + | + | + | + | + |            |            | unknown protein                                                                   |
| 74989 | + | + | + | + | + | + |            |            | unknown protein                                                                   |
| 74997 | + | + | + | + | + | + |            |            | unknown protein                                                                   |
| 75000 | + | + | + | + | + | + |            |            | 3-isopropylmalate dehydratase                                                     |
| 75001 | + | + | + | + | + | + |            |            | neuronal calcium sensor NCS1. regulates sporulation and confers calcium tolerance |
| 75009 | + | + | + | + | + | + |            |            | ribonuclease HII                                                                  |
| 75012 | + | + | + | + | + | + |            |            | unknown protein                                                                   |
| 75015 |   |   |   |   |   |   |            |            | GH27 $\alpha$ -galactosidase                                                      |
| 75021 | + | + | + | + | + | + |            |            | MFS permease                                                                      |
| 75024 | + | + | + | + | + | + |            |            | vacuolar ATP synthase 98 kDa subunit                                              |
| 75027 | + | + | + | + | + | + | 2.399 down | 2.514 down | unknown protein                                                                   |
| 75032 | + | + | + | + | + | + |            |            | unknown protein                                                                   |
| 75036 | + | + | + | + | + | + | 1.618 down | 3.168 down | GH63 $\alpha$ -glucosidase                                                        |
| 75045 | + | + | + | + | + | + |            |            | unknown protein                                                                   |
| 75056 |   |   |   |   |   |   |            |            | uridine kinase                                                                    |
| 75063 | + | + | + | + | + | + |            |            | DNA replication licensing factor mcm6                                             |
| 75069 | + | + | + |   |   |   |            |            | DNA polymeraseDelta. subunit 3                                                    |





|       |   |   |   |   |   |   |               |               |                                                                    |
|-------|---|---|---|---|---|---|---------------|---------------|--------------------------------------------------------------------|
| 75258 | + | + | + | + | + | + |               |               | Peptidase C48. SUMO/Sentrin/Ubl1                                   |
| 75260 |   |   |   |   |   |   | 1.954<br>down | 2.455<br>down | RNA polymerase H/23 kD subunit                                     |
| 75262 |   |   |   |   |   |   |               |               | unknown protein                                                    |
| 75271 | + | + | + | + | + | + | 1.311<br>down | 3.421 up      | pyridoxine biosynthesis protein PDX1                               |
| 75280 | + | + | + | + | + | + |               |               | unknown protein                                                    |
| 75290 |   |   |   |   |   |   | 4.744 up      | 2.431<br>down | dynamamin GTPase                                                   |
| 75294 | + | + | + | + | + | + | 1.696<br>down | 2.545 up      | BCAT_beta_family                                                   |
| 75295 | + | + | + | + | + | + | 1.935<br>down | 2.580<br>down | Trehalose-6-phosphate synthase component TPS1 and related subunits |
| 75304 | + | + | + | + | + | + |               |               | Isopentenyl-diphosphate delta isomerase 2                          |
| 75311 |   |   |   |   |   |   |               |               | phospholipase C. related to N. crassa phospholipase C              |
| 75316 | + | + | + | + | + | + |               |               | unknown protein                                                    |
| 75324 | + | + | + | + | + | + |               |               | prolyl-tRNA synthetase. class IIa.                                 |
| 75334 | + | + | + | + | + | + |               |               | unknown protein                                                    |
| 75335 | + | + | + | + | + | + |               |               | unknown protein                                                    |
| 75336 | + | + |   |   |   |   |               |               | GT alpha 1.2 mannosyltransferase                                   |
| 75342 | + | + | + | + | + | + |               |               | unknown protein                                                    |
| 75347 | + | + | + | + | + | + |               |               | Calcium ion pump. ATPase                                           |
| 75361 | + | + |   |   |   |   | 1.483<br>down | 4.283<br>down | unknown protein                                                    |
| 75368 | + | + | + | + | + | + |               |               | 3-ketoacyl-CoA thiolase                                            |
| 75380 |   |   |   |   |   |   |               |               | unknown protein                                                    |
| 75383 | + | + | + |   |   |   |               |               | short chain dehydrogenase/reductase                                |
| 75385 |   |   |   |   |   |   |               |               | unknown protein                                                    |
| 75394 |   |   |   |   |   |   |               |               | unknown protein                                                    |
| 75397 | + | + | + | + | + | + |               |               | Vacuolar protein sorting-associated protein Vsp9                   |

|       |   |   |   |   |   |   |   |   |   |            |            |                                                                                         |
|-------|---|---|---|---|---|---|---|---|---|------------|------------|-----------------------------------------------------------------------------------------|
| 75403 |   |   |   |   |   |   |   |   |   | 1.074 up   | 2.159 down | CsdB Selenocysteine lyase                                                               |
| 75409 |   |   |   |   |   |   |   |   |   | 1.811 down | 2.064 down | Phospholipid-translocating P-type ATPase. flippase; putative                            |
| 75414 |   |   |   |   |   |   |   |   |   |            |            | TrpD Anthranilate phosphoribosyltransferase                                             |
| 75418 |   |   |   |   |   |   |   |   |   |            |            | C2H2 transcriptional regulator                                                          |
| 75421 |   |   |   |   |   |   |   |   |   |            |            | Dolichyl-P-mannose:protein O-mannosyl transferase                                       |
| 75424 |   |   |   |   |   |   |   |   |   |            |            | Mitochondrial Matrix Factor                                                             |
| 75428 |   |   |   |   |   |   |   |   |   |            |            | RNA binding protein                                                                     |
| 75430 |   |   |   |   |   |   |   |   |   |            |            | Amino acid permease                                                                     |
| 75434 |   |   |   |   |   |   |   |   |   |            |            | unknown protein                                                                         |
| 75440 |   |   |   |   |   |   |   |   |   |            |            | peroxisomal membrane protein (PmpP24)                                                   |
| 75444 |   |   |   |   |   |   |   |   |   |            |            | signalosome subunit 4 (CsnD)                                                            |
| 75447 |   |   |   |   |   |   |   |   |   |            |            | unknown protein                                                                         |
| 75450 |   |   |   |   |   |   |   |   |   |            |            | unknown protein                                                                         |
| 75468 |   |   |   |   |   |   |   |   |   |            |            | Cytochrome P-450 lanosterol demethylase; ergosterol biosynthetic pathway                |
| 75470 |   |   |   |   |   |   |   |   |   | 1.594 up   | 2.271 up   | unknown protein                                                                         |
| 75472 |   |   |   |   |   |   |   |   |   |            |            | transcriptional regulator. unknown                                                      |
| 75475 |   |   |   |   |   |   |   |   |   |            |            | Sulphate permease                                                                       |
| 75506 |   |   |   |   |   |   |   |   |   |            |            | Inosine monophosphate cyclohydrolase                                                    |
| 75514 |   |   |   |   |   |   |   |   |   |            |            | amino acid transporter ARG13                                                            |
| 75518 |   |   |   |   |   |   |   |   |   |            |            | REV1 deoxycytidyl transferase involved in DNA translesion synthesis                     |
| 75529 |   |   |   |   |   |   |   |   |   |            |            | deoxyuridine 5'-triphosphate nucleotidohydrolase                                        |
| 75534 |   |   |   |   |   |   |   |   |   |            |            | RNA-binding protein with KH domain                                                      |
| 75535 |   |   |   |   |   |   |   |   |   |            |            | sphingomyelinase family protein. putative                                               |
| 75547 |   |   |   |   |   |   |   |   |   |            |            | GTP binding nuclear protein Ran. member of the superfamily of RAS small GTPases. relate |
| 75551 |   |   |   |   |   |   |   |   |   |            |            | ATP-NAD kinase                                                                          |
| 75564 |   |   |   |   |   |   |   |   |   |            |            | Ribosomal protein (60S) L11                                                             |
| 75566 |   |   |   |   |   |   |   |   |   |            |            | unknown protein                                                                         |
| 75568 | + | + | + | + | + | + | + | + | + |            |            | thioredoxin. putative                                                                   |

|       |   |   |   |   |   |   |            |            |                                                                    |
|-------|---|---|---|---|---|---|------------|------------|--------------------------------------------------------------------|
| 75580 | + | + | + | + | + | + |            |            | unknown protein                                                    |
| 75589 | + | + | + | + | + | + |            |            | hydroxymethylglutaryl CoA synthase                                 |
| 75593 | + | + | + | + | + | + |            |            | peroxisomal membrane anchor protein (Pex14). putative              |
| 75603 | + | + | + | + | + | + |            |            | patched sphingolipid transporter                                   |
| 75604 | + | + | + | + | + | + |            |            | unknown protein                                                    |
| 75609 | + | + | + | + | + | + | 1.178 up   | 2.180 up   | Rpl18 gene encoding 60sRibosomal protein L18.                      |
| 75620 | + | + | + | + | + | + |            |            | Bromodomain transcription factor                                   |
| 75646 |   |   |   |   |   |   |            |            | HNRNP arginine N-methyltransferase                                 |
| 75648 |   |   |   |   |   |   |            |            | unknown protein                                                    |
| 75655 | + | + |   |   |   |   |            |            | Component of oligomeric golgi complex Cog8                         |
| 75662 | + | + | + | + | + | + |            |            | t-SNARE Sec9; secretory vesicles-plasma membrane                   |
| 75664 | + | + | + | + | + | + |            |            | exhibits similarity to ATP-dependent RNA helicases.                |
| 75672 | + | + | + | + | + | + |            |            | NsdC                                                               |
| 75686 | + | + | + |   |   |   |            |            | mitochondrial distribution and morphology protein                  |
| 75687 | + | + | + | + | + | + |            |            | eukaryotic translation initiation factor 3 subunit EifCj. putative |
| 75689 |   |   |   |   |   |   |            |            | Arginyl-tRNA ligase.                                               |
| 75704 | + | + | + | + | + | + | 1.867 up   | 2.085 up   | Adenosine 5'-phosphosulfate kinase                                 |
| 75707 | + | + | + | + | + | + |            |            | V-ATPase subunit C                                                 |
| 75713 | + | + | + | + |   | + | 6.996 down | 2.139 down | Cytochrome P450 CYP2 subfamily                                     |
| 75736 | + | + | + | + | + | + |            |            | pre-mRNA splicing factor. putative                                 |
| 75739 | + | + | + | + | + | + |            |            | pre-mRNA-splicing factor clf1                                      |
| 75742 |   | + |   |   |   |   |            |            | unknown protein                                                    |
| 75753 | + | + | + | + | + | + |            |            | monothiol glutaredoxin-4                                           |
| 75758 | + | + | + | + | + | + | 1.187 up   | 2.014 down | unknown protein                                                    |
| 75764 | + | + | + | + | + | + |            |            | unknown protein                                                    |
| 75769 | + | + | + | + | + | + |            |            | glucose-6-phosphate dehydrogenase                                  |
| 75794 | + | + | + | + | + | + |            |            | unknown protein                                                    |
| 75838 | + | + | + | + | + | + |            |            | Aldo_ket_redAldo/keto reductase family                             |

|       |   |   |   |   |   |   |               |               |                                                                                        |
|-------|---|---|---|---|---|---|---------------|---------------|----------------------------------------------------------------------------------------|
| 75845 | + | + | + | + | + | + |               |               | NifS Cysteine sulfinase/cysteine desulfurase and related enzymes                       |
| 75854 | + |   | + | + |   | + |               |               | unknown protein                                                                        |
| 75859 | + | + | + | + | + | + |               |               | anion-transporting ATPase                                                              |
| 75872 | + | + | + | + | + | + |               |               | MAPKK. MAP kinase kinase. involved in induction of cytokinesis and appressorium format |
| 75878 | + | + | + | + | + | + |               |               | cAMP dependent protein kinase. protein kinase A. regulatory subunit                    |
| 75879 | + | + | + | + | + | + |               |               | unknown protein                                                                        |
| 75884 | + | + | + | + | + | + | 3.472<br>down | 7.271<br>down | unknown protein                                                                        |
| 75886 |   |   |   |   |   |   |               |               | Cytochrome P450                                                                        |
| 75890 | + | + | + | + | + | + |               |               | C1 tetrahydrofolate synthase. putative                                                 |
| 75918 | + | + | + | + | + | + |               |               | unknown protein                                                                        |
| 75921 | + | + | + | + | + | + |               |               | tRNA-dihydrouridine synthase.                                                          |
| 75923 | + | + | + |   |   |   | 2.091<br>down | 3.079<br>down | unknown protein                                                                        |
| 75934 | + | + | + | + | + | + |               |               | E3-binding protein                                                                     |
| 75935 | + | + | + | + | + | + |               |               | unknown protein                                                                        |
| 75937 |   |   |   |   |   |   |               |               | unknown protein                                                                        |
| 75939 | + | + | + | + | + | + |               |               | unknown protein                                                                        |
| 75949 | + | + | + | + | + | + |               |               | G-protein gamma subunit                                                                |
| 75954 | + | + | + | + | + | + |               |               | translation initiation factor eIF3 subunit.                                            |
| 75965 | + | + | + | + | + | + |               |               | Pre-mRNA-splicing factor RSE1                                                          |
| 75972 | + | + | + | + | + | + |               |               | lectin family integral membrane protein. putative                                      |
| 75975 | + | + | + | + | + | + |               |               | LMBR1 domain-containing protein                                                        |
| 75985 | + | + | + | + | + |   | 2.407 up      | 3.846 up      | Isochorismatase hydrolase                                                              |
| 75989 |   | + |   |   |   |   |               |               | unknown protein                                                                        |
| 75992 |   |   |   |   |   |   |               |               | hydroxyethylthiazole kinase                                                            |
| 75995 | + | + | + | + | + | + | 1.266 up      | 2.204 up      | ssDNA binding protein                                                                  |
| 75998 | + | + | + | + | + | + |               |               | unknown protein                                                                        |
| 76009 | + | + | + | + | + | + |               |               | unknwon zinc finger protein                                                            |
| 76010 | + | + | + | + | + | + |               |               | 20S proteasome. alpha subunit Pre6                                                     |

|       |   |   |   |   |   |   |               |               |                                                                                         |
|-------|---|---|---|---|---|---|---------------|---------------|-----------------------------------------------------------------------------------------|
| 76013 |   |   |   |   |   |   |               |               | FAD linked oxidase domain-containing protein                                            |
| 76018 | + | + | + |   |   |   |               |               | CysKCysteine synthase                                                                   |
| 76029 | + | + | + | + | + | + |               |               | unknown protein                                                                         |
| 76034 |   |   |   |   |   |   | 2.795<br>down | 2.527<br>down | Iron/ascorbate family oxidoreductases                                                   |
| 76037 | + | + | + | + | + | + |               |               | unknown protein                                                                         |
| 76039 | + | + | + | + | + | + |               |               | Zn2Cys6 transcriptional regulator                                                       |
| 76050 | + | + | + | + | + | + |               |               | diphthamide biosynthesis protein 1                                                      |
| 76057 | + | + | + | + | + | + |               |               | Vacuolar ATP synthase subunit B                                                         |
| 76065 |   |   |   |   |   |   |               |               | unknown protein                                                                         |
| 76073 |   | + |   |   |   |   | 1.587 up      | 2.692 up      | U6 snRNA-associated Sm-like protein LSm6                                                |
| 76075 |   | + | + |   |   |   | 3.472 up      | 2.873 up      | unknown protein                                                                         |
| 76082 | + | + | + | + | + | + |               |               | unknown protein                                                                         |
| 76083 | + | + | + | + | + | + |               |               | unknown protein                                                                         |
| 76098 | + | + | + | + | + | + |               |               | unknown protein                                                                         |
| 76114 | + | + | + | + | + | + |               |               | short chain dehydrogenase/reductase                                                     |
| 76117 | + | + | + | + | + | + |               |               | unknown protein                                                                         |
| 76123 | + | + | + | + | + | + |               |               | unknown protein                                                                         |
| 76125 | + | + | + | + | + | + |               |               | unknown protein                                                                         |
| 76136 | + | + | + |   |   |   | 1.097<br>down | 4.994<br>down | unknown protein                                                                         |
| 76141 |   |   |   |   |   |   |               |               | unknown protein. only present in ascomycota                                             |
| 76151 |   |   |   |   |   |   | 1.358 up      | 2.492 up      | GT31 $\beta$ -glycosyltransferase                                                       |
| 76155 |   | + | + |   |   |   |               |               | acid phosphatase-like protein                                                           |
| 76159 | + | + | + | + | + | + |               |               | NADH-ubiquinone oxidoreductase. chain 49kDa                                             |
| 76166 | + | + | + | + | + | + |               |               | ATP synthase subunit 4. mitochondrial precursor                                         |
| 76169 |   |   |   |   |   |   |               |               | NOC4. Involved inNucleolar processing of pre-18S ribosomal RNA. Has a role in theNuclea |
| 76172 | + | + | + | + | + | + |               |               | ER-derived vesicles protein Erv46                                                       |
| 76188 | + | + | + | + | + | + |               |               | cellular morphogenesis protein. putative                                                |
| 76191 | + | + | + | + | + | + |               |               | splicing factor 3B subunit 1. putative                                                  |

|       |   |   |   |   |   |   |             |            |                                                          |
|-------|---|---|---|---|---|---|-------------|------------|----------------------------------------------------------|
| 76200 | + | + | + |   |   |   | 1.138 up    | 2.411 up   | unknown protein                                          |
| 76204 |   |   |   |   |   |   |             |            | NADH:flavin oxidoreductase/12-oxophytodienoate reductase |
| 76210 |   |   |   |   |   |   | 14.836 down | 10.988 up  | GH62 $\alpha$ -L-arabinofuranosidase ABF2                |
| 76215 |   |   |   |   |   |   |             |            | sulfide:quinone oxidoreductase/flavo-binding protein     |
| 76218 |   |   |   |   |   |   |             |            | zinc containing alcohol dehydrogenase superfamily        |
| 76220 |   |   |   |   |   |   | 1.205 down  | 2.030 down | Zn2Cys6 transcriptional regulator                        |
| 76227 |   |   |   |   |   |   |             |            | GH3 $\beta$ -glucosidase CEL3e                           |
| 76230 |   |   |   |   |   |   |             |            | Flavin-containing monooxygenase                          |
| 76235 |   |   |   |   |   |   |             |            | MFS permease                                             |
| 76238 | + | + | + | + | + | + | 38.819 down | 5.536 down | plasma membrane H <sup>+</sup> ATPase                    |
| 76247 |   |   |   |   |   |   |             |            | O-methyltransferase family protein                       |
| 76249 | + | + | + | + | + | + |             |            | unknown protein                                          |
| 76250 |   |   | + | + |   |   |             |            | unknown protein                                          |
| 76266 | + | + | + | + | + | + |             |            | GH16 cell wall glucanosyltransferase                     |
| 76269 |   |   |   |   |   |   |             |            | unknown protein                                          |
| 76288 | + | + | + | + |   |   | 1.806 down  | 2.610 down | short chain dehydrogenase/reductase                      |
| 76291 | + | + | + | + | + | + |             |            | eRF1 (translation factor pelota).                        |
| 76311 | + | + | + | + | + | + |             |            | sodium/hydrogen antiporter                               |
| 76324 | + | + | + | + | + | + |             |            | acetoacetyl-CoA synthase                                 |
| 76329 | + | + | + | + | + | + |             |            | Ran-specific GTPase-activating protein 1. putative       |
| 76330 |   |   |   |   |   |   |             |            | unknown protein                                          |
| 76336 | + | + | + | + | + | + |             |            | GTPase FZO1. transmembrane location                      |
| 76340 | + | + | + | + | + | + |             |            | unknown protein                                          |
| 76359 |   |   |   |   |   |   |             |            | unknown protein. only present in ascomycota              |
| 76360 |   |   |   |   |   |   | 1.105 down  | 5.019 up   | unknown protein. 1 TM domain                             |
| 76363 |   |   |   |   |   |   |             |            | Serine dehydratase                                       |

|       |   |   |   |   |   |   |                 |               |                                                                               |
|-------|---|---|---|---|---|---|-----------------|---------------|-------------------------------------------------------------------------------|
| 76366 |   |   |   |   |   |   | 29.853<br>down  | 3.451<br>down | NADH:flavin oxidoreductase/12-oxophytodienoate reductase                      |
| 76374 |   |   |   |   |   |   |                 |               | AAA ATPase                                                                    |
| 76381 |   | + | + |   |   |   |                 |               | urate oxidase                                                                 |
| 76393 | + | + | + | + | + | + |                 |               | chaperone protein dnaJ 2                                                      |
| 76421 |   |   |   |   |   |   | 1.382<br>down   | 2.333<br>down | aromatic ring-opening dioxygenase LigB subunit. putative                      |
| 76451 |   |   |   |   |   |   |                 |               | C2H2 transcriptional regulator                                                |
| 76453 | + | + | + |   | + |   | 1.175 up        | 2.179 up      | MDR-type ABC transporters                                                     |
| 76481 | + | + | + | + | + | + |                 |               | Pre-mRNA-splicing ATP-dependent RNA helicase PRP28                            |
| 76491 | + | + | + | + | + | + |                 |               | Regulator of Rac1. required for phagocytosis and cell migration               |
| 76502 | + | + | + | + | + | + |                 |               | unknown protein                                                               |
| 76505 | + | + | + | + | + | + |                 |               | C2H2 transcriptional regulator                                                |
| 76514 | + | + | + | + | + | + |                 |               | Eukaryotic-like DNA topoisomerase I                                           |
| 76515 | + | + | + | + | + | + |                 |               | Vacuolar protein sorting-associated protein Vps33                             |
| 76522 | + | + | + | + | + | + |                 |               | Calcium/calmodulin-dependent protein kinase                                   |
| 76532 | + | + | + | + | + | + | 1.535 up        | 6.009 up      | ribosomal protein (60S) P0                                                    |
| 76539 | + | + | + |   |   |   |                 |               | unknown protein                                                               |
| 76540 | + | + | + | + | + | + |                 |               | C2 domain protein (=Ca2+-dependent membrane-targeting module)                 |
| 76543 | + | + | + | + | + | + | 1.052<br>down   | 2.013<br>down | ARF GTPase activator (Csx2). putative                                         |
| 76551 | + | + | + | + | + | + |                 |               | uridylylate kinase                                                            |
| 76557 | + | + | + | + |   | + |                 |               | Calcium transporter                                                           |
| 76564 | + | + | + | + | + | + |                 |               | FSO1 protein                                                                  |
| 76571 | + | + | + | + | + | + |                 |               | unknown protein                                                               |
| 76590 | + | + | + |   |   |   |                 |               | Zn2Cys6 transcriptional regulator PRO1. involved in fruiting body development |
| 76601 |   |   |   |   |   |   | 100.220<br>down | 3.183<br>down | Sulfite oxidase. molybdopterin-binding component                              |
| 76617 | + | + | + | + |   | + |                 |               | FAD-binding dehydrogenase                                                     |
| 76620 | + |   | + |   |   |   | 2.041<br>down   | 2.566<br>down | Glycerol-3-phosphate dehydrogenase                                            |

|       |  |   |   |   |   |   |            |            |                                                                             |
|-------|--|---|---|---|---|---|------------|------------|-----------------------------------------------------------------------------|
| 76633 |  |   | + |   |   |   | 1.083 up   | 4.622 down | MDR multidrug transporter                                                   |
| 76641 |  |   |   |   |   |   |            |            | MFS permease                                                                |
| 76646 |  | + | + | + | + | + |            |            | unknown protein                                                             |
| 76652 |  |   |   |   |   |   |            |            | flavin-binding monooxygenase. putative                                      |
| 76658 |  | + | + | + | + | + |            |            | unknown protein                                                             |
| 76659 |  |   |   |   |   |   | 1.222 up   | 5.631 up   | unknown protein                                                             |
| 76672 |  |   |   |   |   |   | 1.287 down | 27.778 up  | GH3 $\beta$ -glucosidase BGL1/CEL3a                                         |
| 76677 |  |   |   |   |   | + | 1.132 down | 2.490 down | Zn2Cys6 transcriptional regulator                                           |
| 76682 |  |   |   |   |   |   | 1.259 up   | 4.843 up   | PDR-type ABC transporters                                                   |
| 76690 |  |   |   |   |   |   |            |            | unknown protein                                                             |
| 76696 |  |   |   |   |   | + |            |            | Flavin-containing monooxygenase                                             |
| 76700 |  | + | + | + | + | + |            |            | GH17 glucan 1.3 $\beta$ -glucosidase/ glucan endo-1.3- $\beta$ -glucosidase |
| 76701 |  | + | + | + | + | + |            |            | peroxisomal membrane protein pex16                                          |
| 76705 |  | + | + | + | + | + | 1.082 up   | 2.325 down | Zn2Cys6 transcriptional regulator                                           |
| 76706 |  | + | + | + | + | + |            |            | fungal specific transcription factor domain-containing protein              |
| 76710 |  | + | + | + | + | + |            |            | DNA-directed RNA polymerase III subunit RPC1                                |
| 76713 |  |   |   |   |   |   | 1.567 down | 3.232 down | unknown protein                                                             |
| 76722 |  |   |   | + | + |   |            |            | flavo-hemoglobin                                                            |
| 76734 |  | + | + | + |   |   |            |            | unknown SWIRM domain protein                                                |
| 76740 |  | + | + | + | + | + | 1.492 up   | 3.307 up   | zuotin                                                                      |
| 76744 |  | + | + | + | + | + |            |            | acetyl-transferring pyruvate dehydrogenase. E1 component beta subunit       |
| 76752 |  | + | + | + | + | + |            |            | unknown protein                                                             |
| 76758 |  |   |   |   |   |   |            |            | maltose permease                                                            |
| 76763 |  |   |   |   |   |   |            |            | PTH11 GPCR                                                                  |
| 76766 |  | + | + | + | + | + | 1.542 down | 2.240 down | xanthine/uracil permease                                                    |



|       |   |   |   |   |   |   |            |            |                                                    |
|-------|---|---|---|---|---|---|------------|------------|----------------------------------------------------|
| 76771 | + | + | + | + | + | + |            |            | unknown protein                                    |
| 76775 |   |   | + |   |   |   |            |            | MFS permease                                       |
| 76784 | + | + | + |   |   |   |            |            | sorbitol dehydrogenase                             |
| 76795 | + | + | + | + | + | + |            |            | pre-mRNA splicing factor. putative                 |
| 76800 |   |   |   |   |   |   |            |            | MFS permease                                       |
| 76817 | + | + | + | + | + | + |            |            | GATA type transcriptional regulator                |
| 76820 | + | + | + | + |   | + |            |            | unknown protein                                    |
| 76822 |   |   |   |   |   |   | 6.287 up   | 2.302 down | unknown protein                                    |
| 76828 | + | + | + | + | + | + | 1.334 up   | 2.039 up   | exosome complex exonuclease RRP40. putative        |
| 76833 | + | + | + | + | + | + |            |            | rRNA assembly protein Mis3                         |
| 76845 | + | + | + | + | + | + |            |            | unknown protein                                    |
| 76852 |   |   |   |   |   |   |            |            | GH2 $\beta$ -galactosidase/ $\beta$ -glucuronidase |
| 76859 | + | + | + | + | + | + |            |            | Importin $\beta$ KapD                              |
| 76862 | + | + | + | + | + | + |            |            | palmitoyltransferase PFA5. putative                |
| 76872 | + | + | + | + | + | + |            |            | Zn2Cys6 transcriptional regulator                  |
| 76875 | + | + | + | + | + | + |            |            | unknown protein                                    |
| 76880 |   |   | + |   |   |   |            |            | GTPase Rsr1 (A. fumigatus)                         |
| 76887 | + | + | + | + | + | + |            |            | aspartyl protease                                  |
| 76897 | + | + | + | + | + | + | 1.363 down | 2.796 down | MFS permease                                       |
| 76905 | + | + | + | + | + | + |            |            | unknown protein                                    |
| 76906 | + | + | + | + | + | + |            |            | unknown protein                                    |
| 76910 |   |   |   |   |   |   | 2.344 down | 2.174 down | monocarboxylate transporter                        |
| 76919 | + | + | + | + | + | + |            |            | calcium-spray protein                              |
| 76927 | + | + | + | + | + | + |            |            | translation initiation factor SUI1.                |
| 76930 | + | + | + | + | + | + |            |            | complex I intermediate-associated protein 30       |
| 76939 | + | + | + | + | + | + |            |            | Ribosomal protein S9. S4 family                    |
| 76949 | + | + | + |   |   | + |            |            | unknown protein                                    |

|       |   |   |   |   |   |   |               |               |                                                                          |
|-------|---|---|---|---|---|---|---------------|---------------|--------------------------------------------------------------------------|
| 76954 |   |   |   |   |   |   |               |               | Alkaline phosphatase                                                     |
| 76960 | + | + | + | + | + | + |               |               | unknown protein                                                          |
| 76971 | + | + | + | + |   |   |               |               | SSCRP                                                                    |
| 76986 |   | + |   |   |   |   | 1.119<br>down | 2.765<br>down | unknown protein                                                          |
| 76992 |   |   |   |   |   |   |               |               | MFS permease                                                             |
| 76995 |   |   |   |   |   |   |               |               | unknown protein                                                          |
| 77000 | + | + | + | + | + | + |               |               | Haloacid dehalogenase-like protein                                       |
| 77007 | + | + | + | + | + | + |               |               | pre-mRNA-splicing factor CWC2                                            |
| 77009 |   | + |   |   |   |   |               |               | GTP binding protein (Gtp1). putative                                     |
| 77014 | + | + | + | + | + | + |               |               | Guanosine diphosphatase. transport of GDP-mannose into the Golgi lumen   |
| 77025 | + | + | + | + | + | + |               |               | P-type ATPase with putative aminophospholipid translocase activity. neo1 |
| 77031 | + | + | + | + | + | + |               |               | Rho-GTPase effector BNI1 and related formins                             |
| 77038 | + | + | + | + | + | + |               |               | R-SNARE Sec22; anterograde/retrograde transport ER-Golgi                 |
| 77056 | + | + | + | + | + | + |               |               | vacuolar protein sorting 55                                              |
| 77084 | + | + | + | + |   |   |               |               | cell wall biogenesis protein phosphatase Ssd1. putative                  |
| 77086 | + | + | + |   |   |   |               |               | ATP dependent DNA ligase domain-containing protein                       |
| 77093 |   |   | + |   |   |   |               |               | acid sphingomyelin phosphodiesterase (probably vacuolar)                 |
| 77098 | + | + | + | + | + | + |               |               | unknown protein                                                          |
| 77099 | + | + | + | + | + | + |               |               | unknown protein                                                          |
| 77119 | + | + | + | + | + | + |               |               | ornithine decarboxylase                                                  |
| 77122 | + | + | + | + | + | + |               |               | mitochondrial presequence protease CYM1                                  |
| 77135 | + | + | + | + | + | + |               |               | Protein phosphatase 2A. regulatory B subunit. B56                        |
| 77138 | + | + | + | + | + | + | 1.151 up      | 2.395 up      | unknown protein                                                          |
| 77142 | + | + | + | + | + | + |               |               | TATA-binding protein interacting (TIP20) . putative                      |
| 77154 | + | + | + | + | + | + |               |               | homeobox transcriptional regulator                                       |
| 77167 | + | + | + | + | + | + | 1.011<br>down | 3.488<br>down | unknown protein                                                          |
| 77188 | + | + | + | + | + | + |               |               | 60S ribosomal protein L1                                                 |
| 77191 | + | + | + |   |   |   |               |               | BZIP transcriptional regulator                                           |

|       |   |   |   |   |   |   |               |               |                                                                                      |
|-------|---|---|---|---|---|---|---------------|---------------|--------------------------------------------------------------------------------------|
| 77193 | + | + | + | + | + | + |               |               | unknown protein                                                                      |
| 77202 |   |   |   |   |   |   | 6.662<br>down | 4.546<br>down | short chain dehydrogenase/reductase                                                  |
| 77209 | + | + | + | + | + | + |               |               | splicing factor 3a                                                                   |
| 77215 | + | + | + | + | + | + |               |               | unknown protein                                                                      |
| 77218 | + | + | + | + | + | + |               |               | outer membrane protein TOM13                                                         |
| 77222 | + | + | + | + | + | + |               |               | unknown protein                                                                      |
| 77227 | + | + | + | + | + | + |               |               | UDP-glucose ceramide glucosyltransferase                                             |
| 77234 | + | + | + | + | + | + |               |               | unknown protein                                                                      |
| 77242 | + | + | + |   |   |   |               |               | glutamate N-acetyltransferase precursor                                              |
| 77251 | + | + | + | + | + | + |               |               | histone acetylase complex subunit Paf400. putative                                   |
| 77254 |   |   |   |   |   |   |               |               | unknown protein                                                                      |
| 77266 |   |   |   |   |   |   |               |               | Thymidylate kinase                                                                   |
| 77279 | + | + | + | + | + | + |               |               | SNF4                                                                                 |
| 77281 | + | + | + | + | + | + |               |               | importin $\alpha$ KapA                                                               |
| 77283 | + | + | + | + | + | + |               |               | GT2 glycosyltransferase                                                              |
| 77284 | + | + | + | + | + | + |               |               | GH12 endo- $\beta$ -1.4-glucanase                                                    |
| 77288 |   |   |   |   |   |   |               |               | Thioredoxin reductase                                                                |
| 77291 |   |   |   |   |   |   | 1.359 up      | 2.532<br>down | Zn2Cys6 transcriptional regulator                                                    |
| 77299 |   |   |   |   |   |   | 3.682<br>down | 2.262 up      | GH2 Exo- $\beta$ -D-glucosaminidase GLS93                                            |
| 77309 | + | + | + | + | + | + |               |               | S-adenosylmethionine decarboxylase                                                   |
| 77311 | + | + | + | + | + | + |               |               | unknown protein                                                                      |
| 77330 | + | + | + | + | + | + |               |               | 26S proteasome regulatory complex subunit Rpn9                                       |
| 77336 | + | + | + | + | + | + |               |               | aconitate hydratase                                                                  |
| 77339 | + | + | + | + | + | + |               |               | unknown protein                                                                      |
| 77353 | + | + | + | + | + | + |               |               | NADH-ubiquinone oxidoreductase 40 kDa subunit-like protein                           |
| 77364 | + | + | + | + | + | + |               |               | unknown protein                                                                      |
| 77373 | + | + | + | + | + | + |               |               | dihydrolipoyl dehydrogenase (E3 component of both 2-oxoglutarate dehydrogenase and p |

|       |  |   |   |   |   |   |   |               |               |                                                               |
|-------|--|---|---|---|---|---|---|---------------|---------------|---------------------------------------------------------------|
| 77380 |  | + | + |   |   |   |   |               |               | RNA binding protein                                           |
| 77404 |  | + | + | + | + | + | + |               |               | importin $\beta$ Kap1                                         |
| 77412 |  | + | + | + | + | + | + |               |               | unknown protein                                               |
| 77423 |  |   |   |   |   |   |   | 2.978<br>down | 5.195<br>down | Jacalin-like lectin                                           |
| 77425 |  | + | + | + | + | + | + |               |               | unknown protein                                               |
| 77440 |  | + | + | + | + | + | + |               |               | unknown protein                                               |
| 77441 |  | + | + | + | + | + | + |               |               | Vacuolar sorting protein Vps74                                |
| 77447 |  | + | + | + | + | + | + |               |               | unknown protein                                               |
| 77456 |  | + | + | + | + | + | + |               |               | unknown protein                                               |
| 77466 |  | + | + | + | + | + | + |               |               | unknown protein                                               |
| 77473 |  |   |   |   |   |   |   |               |               | DNA photolyase. N-terminal. class 1. FAD-binding              |
| 77476 |  | + | + | + | + | + | + |               |               | unknown protein                                               |
| 77478 |  | + | + | + | + | + | + |               |               | kinesin-like protein                                          |
| 77481 |  | + | + | + |   |   |   |               |               | D-xylulose 5-phosphate/D-fructose 6-phosphate phosphoketolase |
| 77485 |  | + | + | + | + | + | + |               |               | T-complex protein 1                                           |
| 77495 |  | + | + | + | + | + | + | 1.182 up      | 2.172 up      | eukaryotic translation initiation factor 3 subunit 11.        |
| 77505 |  | + | + | + | + | + | + |               |               | unknown protein                                               |
| 77506 |  | + | + | + | + | + | + | 1.173<br>down | 2.078<br>down | GH5 $\beta$ -glycosidase CEL5d                                |
| 77512 |  |   |   |   |   |   |   |               |               | cytochrome P450                                               |
| 77513 |  | + | + | + |   |   |   |               |               | Zn2Cys6 transcriptional regulator                             |
| 77517 |  | + | + | + | + | + | + | 1.129 up      | 3.423 up      | MFS hexose transporter                                        |
| 77539 |  | + | + | + | + | + | + |               |               | glucosidase 2 subunit beta                                    |
| 77541 |  | + | + | + | + | + | + |               |               | actin-like protein                                            |
| 77547 |  |   |   |   |   |   |   | 2.598<br>down | 6.449<br>down | GT1 glycosyltransferase                                       |
| 77552 |  |   |   |   |   |   |   |               |               | Inorganic phosphate transporter                               |
| 77557 |  | + |   | + |   |   | + | 7.316<br>down | 5.660<br>down | GT glycosyltransferases not yet assigned to a family. 3 TMs   |
| 77570 |  | + | + | + | + | + | + |               |               | Vesicle coat complex COPII. Sfb3                              |

|       |   |   |   |   |   |   |               |               |                                                                  |
|-------|---|---|---|---|---|---|---------------|---------------|------------------------------------------------------------------|
| 77577 | + | + | + | + | + | + |               |               | unknown protein                                                  |
| 77579 | + | + | + | + | + | + |               |               | aspartyl protease                                                |
| 77583 | + | + | + | + | + | + |               |               | SEC14. phosphatidylinositol/phosphatidylcholine transfer protein |
| 77587 | + | + | + | + | + | + |               |               | 19S regulatory particle ATPase Rpt3                              |
| 77591 | + | + | + | + | + | + |               |               | 26S proteasome regulatory complex subunit Rpn3                   |
| 77593 |   | + |   |   |   |   | 1.259<br>down | 3.284<br>down | unknown protein                                                  |
| 77602 | + | + | + | + | + | + | 1.503<br>down | 2.212<br>down | A.a-trehalose-phosphate synthase                                 |
| 77609 | + | + | + | + | + | + |               |               | AT-rich interaction region                                       |
| 77613 | + | + | + | + | + | + |               |               | eukaryotic translation initiation factor 3 subunit E             |
| 77616 |   |   |   |   |   |   |               |               | aminoacyl-tRNA synthetase and proteasome regulatory subunit.     |
| 77629 | + | + | + | + | + | + | 1.847 up      | 2.756 up      | unknown protein                                                  |
| 77634 | + | + | + | + | + | + |               |               | N-acetylglucosaminyl transferase component Gpi1                  |
| 77642 | + | + | + | + | + | + |               |               | nuclear migration protein NudF                                   |
| 77647 | + | + | + | + | + | + |               |               | threonine aldolase                                               |
| 77656 | + | + | + | + | + | + |               |               | phosphoglycerate mutase                                          |
| 77661 | + | + | + | + | + | + |               |               | unknown proteinsterol binding protein                            |
| 77667 | + | + | + | + | + | + |               |               | RING-5                                                           |
| 77672 | + | + | + | + | + | + |               |               | effector of Sec4; Sro7 / Sro77                                   |
| 77685 | + | + | + | + | + | + |               |               | SAGA complex bromodomain subunit Spt7. putative                  |
| 77689 | + | + | + | + | + | + |               |               | PTPc. Protein tyrosine phosphatases (PTP)                        |
| 77699 |   |   |   |   |   |   |               |               | unknown protein                                                  |
| 77703 |   |   | + |   |   |   |               |               | PDR-type ABC transporters                                        |
| 77706 | + | + | + | + | + | + |               |               | unknown protein                                                  |
| 77713 | + | + | + | + | + | + |               |               | unknown protein                                                  |
| 77714 |   | + |   |   |   |   |               |               | biotin-protein ligase                                            |
| 77732 | + | + | + | + | + | + |               |               | Ubiquitin conjugating enzyme Ubc6                                |
| 77736 | + | + | + | + | + | + |               |               | unknown protein                                                  |
| 77739 | + | + | + | + | + | + |               |               | HgmAhomogentisate .-dioxygenase                                  |

|       |   |   |   |   |   |   |            |            |                                                                                            |
|-------|---|---|---|---|---|---|------------|------------|--------------------------------------------------------------------------------------------|
| 77743 |   |   |   |   |   |   | 1.852 up   | 3.027 down | unknown protein                                                                            |
| 77744 | + | + | + | + | + | + |            |            | unknown protein                                                                            |
| 77747 | + | + | + | + | + | + |            |            | RNA-binding protein Vip1                                                                   |
| 77749 | + | + | + | + | + | + |            |            | fumarylacetoacetase                                                                        |
| 77758 | + | + | + | + | + | + |            |            | cytochrome c heme lyase. putative                                                          |
| 77764 | + | + | + | + | + | + |            |            | histidine kinase PHY1p. phytochrome-like                                                   |
| 77767 | + | + | + | + |   | + |            |            | Taurine catabolism dioxygenase TauD. putative                                              |
| 77770 |   |   |   |   |   |   |            |            | Zinc-containing alcohol dehydrogenase                                                      |
| 77780 |   | + | + |   |   |   |            |            | unknown protein                                                                            |
| 77785 |   |   |   |   |   |   |            |            | MFS permease                                                                               |
| 77795 | + | + | + | + | + | + |            |            | LIMPET. E3-ubiquitin ligase SCON-2                                                         |
| 77806 | + | + | + |   |   |   |            |            | Alcohol dehydrogenase. class V                                                             |
| 77811 | + | + | + | + | + | + |            |            | AMP-dependent synthetase and ligase                                                        |
| 77829 | + | + | + | + | + | + |            |            | unknown protein                                                                            |
| 77836 |   |   |   |   |   |   |            |            | unknown protein                                                                            |
| 77848 | + | + | + | + | + | + |            |            | unknown protein                                                                            |
| 77850 | + | + | + | + | + | + |            |            | unknown protein                                                                            |
| 77870 | + | + | + | + | + | + |            |            | peroxin 8. putative                                                                        |
| 77878 |   |   |   |   |   |   | 1.096 down | 3.446 up   | C2H2 transcriptional regulator                                                             |
| 77887 | + | + |   |   |   |   |            |            | unknown protein                                                                            |
| 77906 | + | + | + | + | + | + |            |            | unknown protein                                                                            |
| 77915 | + | + | + | + | + | + | 1.061 up   | 2.019 up   | unknown protein                                                                            |
| 77932 | + | + | + | + | + | + | 1.446 up   | 3.282 up   | Ribosomal protein L30.                                                                     |
| 77942 | + | + | + |   |   |   |            |            | GH72 $\beta$ -1 3-glucanosyltransferase                                                    |
| 77955 | + | + | + | + | + | + |            |            | cytochrome b5-like Heme/Steroid binding domain-containing protein                          |
| 77969 | + | + | + |   |   |   |            |            | chromate transporter                                                                       |
| 77974 | + | + | + | + | + | + |            |            | half-sized ABC transporter                                                                 |
| 77979 | + | + | + | + | + | + | 1.525 up   | 2.412 up   | SmallSubunit. aps3. of the adaptor protein complex AP-3 of clathrin-coated vesicles; invol |

|       |   |   |   |   |   |   |               |               |                                                            |
|-------|---|---|---|---|---|---|---------------|---------------|------------------------------------------------------------|
| 77989 | + | + | + | + | + | + |               |               | Csh7. an ER membrane chaperone protein                     |
| 77991 | + | + | + | + | + | + |               |               | RNA polymerase TFIIF complex subunit Ssl1. putative        |
| 77998 | + | + | + |   |   |   |               |               | unknown protein                                            |
| 78004 | + | + | + | + | + | + |               |               | triose phosphate/3-phosphoglycerate/phosphate translocator |
| 78010 | + | + | + | + | + | + | 1.096<br>down | 2.423<br>down | ankyrin containing protein                                 |
| 78012 | + | + | + | + | + | + | 1.359<br>down | 2.109<br>down | Sensory transduction histidine kinase                      |
| 78027 | + | + | + | + | + | + |               |               | unknown protein. only in fungi                             |
| 78037 |   |   |   |   |   |   | 1.220<br>down | 3.040<br>down | unknown protein                                            |
| 78042 | + | + | + | + | + | + | 1.091<br>down | 2.296<br>down | unknown protein                                            |
| 78044 | + | + | + | + | + | + |               |               | unknown protein                                            |
| 78046 | + | + | + | + | + | + |               |               | eukaryotic translation initiation factor 3                 |
| 78049 |   |   |   |   |   |   |               |               | elongation factor Tu (G).                                  |
| 78054 |   |   |   |   |   |   |               |               | Vacuolar protein sorting-associated protein Vps16          |
| 78061 | + | + | + | + | + | + |               |               | unknown protein                                            |
| 78062 | + | + | + | + | + | + |               |               | rRNA biogenesis protein RRP5                               |
| 78072 |   |   |   |   |   |   |               |               | Amidase                                                    |
| 78095 | + | + | + |   |   |   |               |               | unknown protein                                            |
| 78109 | + | + | + | + | + | + |               |               | pre-mRNA processing splicing factor 8                      |
| 78117 | + | + | + | + | + | + |               |               | unknown protein                                            |
| 78130 | + | + | + | + | + | + |               |               | C-5 sterol desaturase                                      |
| 78158 | + | + | + | + | + | + |               |               | importin $\beta$ KapL                                      |
| 78162 | + | + | + | + | + | + |               |               | unknown protein                                            |
| 78176 | + | + | + | + | + | + |               |               | $\beta$ -1.3-glucan synthase                               |
| 78189 | + | + | + | + | + | + |               |               | Component of oligomeric golgi complex Cog5                 |
| 78191 | + | + | + | + |   | + |               |               | unknown protein                                            |
| 78223 |   |   |   |   |   |   |               |               | Cytochrome P450 CYP3/CYP5/CYP6/CYP9 subfamilies            |
| 78226 |   |   | + |   |   |   |               |               | unknown protein                                            |

|       |   |   |   |   |   |   |            |            |                                                                                        |
|-------|---|---|---|---|---|---|------------|------------|----------------------------------------------------------------------------------------|
| 78233 | + | + | + | + | + | + |            |            | 40s ribosomal protein S21 based on homolgy to the corresponding protein in Giberella z |
| 78242 | + | + | + | + | + | + |            |            | unknown protein                                                                        |
| 78248 |   |   |   |   |   |   |            |            | short chain dehydrogenase/reductase                                                    |
| 78264 | + | + | + | + | + | + | 1.611 up   | 2.211 up   | Peptide methionine sulfoxide reductase                                                 |
| 78268 | + | + | + | + | + | + |            |            | unknown protein                                                                        |
| 78274 | + | + | + | + | + | + | 1.231 down | 2.084 up   | phosphatidylinositol-3-phosphate 5-kinase; fab1                                        |
| 78288 | + | + | + | + | + | + |            |            | unknown protein                                                                        |
| 78301 | + | + | + | + | + | + | 1.228 down | 2.251 down | cation diffusion facilitator family transporter                                        |
| 78306 | + | + | + | + | + | + |            |            | thiosulfate sulfurtransferase                                                          |
| 78309 |   |   |   |   |   |   |            |            | unknown protein                                                                        |
| 78314 | + | + | + | + | + | + |            |            | RgsB. regulator of G-protein signaling                                                 |
| 78320 |   |   |   |   |   |   |            |            | Sulfatase                                                                              |
| 78322 | + | + | + | + | + | + |            |            | unknown protein                                                                        |
| 78340 |   |   |   |   |   |   |            |            | unknown protein                                                                        |
| 78343 | + | + | + | + | + | + |            |            | unknown protein                                                                        |
| 78347 |   | + |   |   |   |   |            |            | 3-deoxy-7-phosphoheptulonate synthase                                                  |
| 78357 | + | + | + | + | + | + | 1.122 down | 2.796 down | NADH-quinone oxidoreductase. putative                                                  |
| 78373 | + | + | + | + | + | + |            |            | half-sized ABC transporter                                                             |
| 78377 | + | + | + | + | + | + |            |            | GTP-binding protein. HSR1-related. member ofGTP1/OBG family                            |
| 78387 |   |   |   |   |   |   |            |            | Cytochrome P450 CYP3/CYP5/CYP6/CYP9 subfamilies                                        |
| 78391 |   |   |   |   |   |   | 1.462 down | 4.460 down | unknown protein                                                                        |
| 78401 | + | + | + | + | + | + |            |            | unknown protein                                                                        |
| 78409 | + | + | + | + | + | + |            |            | ThrC Threonine synthase                                                                |
| 78415 | + | + | + | + | + | + |            |            | unknown protein                                                                        |
| 78421 | + | + | + | + | + | + |            |            | unknown protein                                                                        |
| 78423 | + | + | + | + | + | + |            |            | 26S proteasome regulatory complex subunit Rpn2                                         |
| 78437 | + | + | + | + | + | + |            |            | unknown protein                                                                        |



|       |   |   |   |   |   |   |             |            |                                                                                            |
|-------|---|---|---|---|---|---|-------------|------------|--------------------------------------------------------------------------------------------|
| 78439 | + | + | + | + | + | + |             |            | pyruvate kinase                                                                            |
| 78445 |   |   |   |   |   |   |             |            | Zn2Cys6 transcriptional regulator                                                          |
| 78448 |   |   |   |   |   |   |             |            | unknown protein                                                                            |
| 78462 |   |   |   |   |   |   |             |            | L-carnitine dehydratase/alpha-methylacyl-CoA racemase                                      |
| 78463 |   |   |   |   |   |   |             |            | unknown protein                                                                            |
| 78465 |   |   |   |   |   |   | 1.324 up    | 2.856 up   | siderophore transporter                                                                    |
| 78476 |   |   |   |   |   |   |             |            | unknown protein                                                                            |
| 78482 | + | + | + | + | + | + |             |            | acyl carrier protein precursor. mitochondrial [NADH-ubiquinone oxidoreductase subunit]     |
| 78496 |   |   | + |   |   |   |             |            | Flavin-containing monooxygenase Fmo1 like                                                  |
| 78499 |   |   | + |   |   |   |             |            | PTH11 GPCR                                                                                 |
| 78542 |   |   |   |   |   |   |             |            | cytosolic phospholipase A2. putative                                                       |
| 78543 | + | + | + | + | + | + |             |            | RNA-binding La domain protein                                                              |
| 78552 |   |   |   |   |   |   | 1.082 down  | 2.510 down | Aromatic L-amino acid decarboxylase                                                        |
| 78555 | + | + | + | + | + | + |             |            | Esterase of the alpha-beta hydrolase superfamily (Neuropathy target Esterase). contains c  |
| 78560 | + | + | + | + | + | + |             |            | unknown protein                                                                            |
| 78561 |   | + |   |   |   |   |             |            | Molybdenum cofactor biosynthesis protein                                                   |
| 78576 |   | + |   |   |   |   |             |            | unknown protein                                                                            |
| 78582 | + | + | + | + | + | + |             |            | ferrochelatase                                                                             |
| 78585 |   |   |   |   |   |   | 39.746 down | 4.811 down | MFS permease                                                                               |
| 78591 | + | + | + | + | + | + |             |            | fatty acid synthase beta subunit [Includes: 3-hydroxypalmitoyl-[acyl-carrier-protein] dehy |
| 78611 | + | + |   |   |   |   | 1.873 down  | 4.125 down | phospholipase D                                                                            |
| 78626 | + | + | + | + | + | + |             |            | unknown protein                                                                            |
| 78639 |   | + | + |   |   |   | 4.778 up    | 2.880 up   | Serine/threonine protein kinase                                                            |
| 78641 | + | + | + | + | + | + |             |            | F-box and WD domain-containing protein                                                     |
| 78645 | + | + | + | + | + | + |             |            | unknown protein. 2 TM                                                                      |
| 78650 | + | + | + | + | + | + |             |            | C2H2 transcriptional regulator                                                             |
| 78661 | + | + | + | + | + | + |             |            | ribosomal protein S5. MRPS5.                                                               |

|       |   |   |   |  |  |  |  |  |  |            |            |                                                        |
|-------|---|---|---|--|--|--|--|--|--|------------|------------|--------------------------------------------------------|
| 78679 |   |   |   |  |  |  |  |  |  | 1.345 up   | 2.057 up   | mitochondrial carrier protein                          |
| 78681 |   |   |   |  |  |  |  |  |  |            |            | SSCRP                                                  |
| 78683 |   |   |   |  |  |  |  |  |  |            |            | aldehyde dehydrogenase                                 |
| 78685 |   |   |   |  |  |  |  |  |  |            |            | unknown protein                                        |
| 78688 |   |   |   |  |  |  |  |  |  | 1.703 down | 2.746 down | Winged helix repressor DNA-binding                     |
| 78690 |   |   |   |  |  |  |  |  |  |            |            | unknown protein                                        |
| 78693 |   |   |   |  |  |  |  |  |  |            |            | tRNA intron endonuclease. N-terminal.                  |
| 78695 |   |   |   |  |  |  |  |  |  |            |            | unknown protein                                        |
| 78706 |   |   |   |  |  |  |  |  |  |            |            | unknown protein                                        |
| 78713 |   |   |   |  |  |  |  |  |  | 3.003 down | 4.203 down | GH72 $\beta$ -(1-3) glucanosyltransferase              |
| 78725 |   |   |   |  |  |  |  |  |  |            |            | unknown protein                                        |
| 78726 |   |   |   |  |  |  |  |  |  |            |            | DNA-directed RNA polymerase. 30-40 kDa subunit         |
| 78732 |   |   |   |  |  |  |  |  |  |            |            | 6-phosphofructo-2-kinase                               |
| 78738 |   |   |   |  |  |  |  |  |  |            |            | sodium/hydrogen exchanger family protein               |
| 78740 |   |   |   |  |  |  |  |  |  | 1.037 up   | 2.234 up   | v-SNARE Bet1. ER-Golgi complex                         |
| 78753 |   |   |   |  |  |  |  |  |  |            |            | Nucleoporin interacting component                      |
| 78757 |   |   |   |  |  |  |  |  |  |            |            | plasma membrane H <sup>+</sup> ATPase                  |
| 78765 |   |   |   |  |  |  |  |  |  |            |            | mitochondrial DNA replication protein (Yhm2). putative |
| 78768 |   |   |   |  |  |  |  |  |  |            |            | unknown protein                                        |
| 78773 | + | + | + |  |  |  |  |  |  | 1.069 down | 2.061 down | long-chain-fatty-acid--CoA ligase 2                    |
| 78783 |   |   |   |  |  |  |  |  |  |            |            | kinetochore protein SPC25                              |
| 78792 |   |   |   |  |  |  |  |  |  | 1.875 down | 4.111 down | unknown protein                                        |
| 78797 |   |   |   |  |  |  |  |  |  | 1.085 down | 3.513 down | xanthine dehydrogenase                                 |
| 78799 |   |   |   |  |  |  |  |  |  | 1.076 down | 3.434 down | Zn2Cys6 transcriptional regulator                      |
| 78806 |   |   |   |  |  |  |  |  |  |            |            | Ubiquitin chain assembly factor (E4)                   |

|       |   |   |   |   |   |   |               |               |                                                             |
|-------|---|---|---|---|---|---|---------------|---------------|-------------------------------------------------------------|
| 78811 | + | + | + | + | + | + | 1.201<br>down | 2.151<br>down | unknown protein                                             |
| 78817 | + | + | + | + | + | + |               |               | 19S regulatory particle ATPase Rpt6                         |
| 78823 | + | + | + | + | + | + |               |               | unknown protein                                             |
| 78828 |   | + |   |   |   |   | 2.840 up      | 2.953 up      | carboxylesterase type B                                     |
| 78833 |   |   |   |   |   |   |               |               | MFS permease (fucose permease)                              |
| 78836 | + | + | + | + | + | + |               |               | mitochondrial phosphate carrier                             |
| 78843 |   |   |   |   |   |   |               |               | unknown protein                                             |
| 78852 | + | + | + | + | + | + |               |               | Esterase/lipase/thioesterase                                |
| 78864 |   |   |   |   |   |   | 1.190 up      | 2.701 up      | GcvTGlycine cleavage system T protein                       |
| 78866 | + | + | + | + | + | + | 1.009 up      | 2.054<br>down | unknown protein                                             |
| 78870 | + | + | + | + | + | + |               |               | unknown protein                                             |
| 78873 | + | + | + | + | + | + |               |               | unknown protein                                             |
| 78882 | + | + | + | + | + | + |               |               | 20S proteasome beta-type subunit Pre7                       |
| 78886 | + | + | + | + | + | + |               |               | unknown protein                                             |
| 78895 | + | + | + | + | + | + | 1.006 up      | 2.724<br>down | Zn2Cys6 transcriptional regulator                           |
| 78909 | + | + | + | + | + | + |               |               | serine/threonine protein kinase cot1                        |
| 78925 | + | + | + | + | + | + |               |               | 20S proteasome beta-type subunit Pre4                       |
| 78929 | + | + | + | + | + | + |               |               | Beta_HSD-beta hydroxysteroid dehydrogenase/isomerase family |
| 78935 |   |   |   |   |   |   |               |               | ubiquitin-conjugating enzyme                                |
| 78939 | + | + | + | + | + | + |               |               | pre-mRNA splicing helicase                                  |
| 78953 | + | + | + | + | + | + |               |               | unknown protein with CORD and CS domain                     |
| 78956 |   |   |   |   |   |   |               |               | unknown protein                                             |
| 78958 | + | + | + | + | + | + |               |               | Autophagy-related protein 22                                |
| 78960 | + | + | + | + | + | + |               |               | unknown protein                                             |
| 78961 | + | + | + | + | + | + |               |               | F-actin capping protein. beta subunit domain                |
| 78966 | + | + | + | + | + | + |               |               | unknown protein                                             |
| 78968 | + | + | + | + | + | + |               |               | unknown protein                                             |

|       |   |   |   |   |   |   |               |               |                                                                                                  |
|-------|---|---|---|---|---|---|---------------|---------------|--------------------------------------------------------------------------------------------------|
| 78970 | + | + | + | + | + | + | 2.472<br>down | 4.870<br>down | mitochondrial (phosphate) carrier                                                                |
| 78984 | + | + | + | + | + | + | 1.304<br>down | 2.108<br>down | unknown protein                                                                                  |
| 78988 | + | + | + |   | + | + |               |               | Gβ-WD40 domain protein                                                                           |
| 79010 | + | + | + |   |   |   |               |               | lipase. putative                                                                                 |
| 79014 | + | + | + | + | + | + |               |               | Vacuolar ATP synthase 16 kDa proteolipid subunit                                                 |
| 79019 | + | + | + | + | + | + |               |               | Phospholipase D                                                                                  |
| 79031 | + | + | + | + | + | + |               |               | GTP-binding protein                                                                              |
| 79034 | + | + | + | + | + | + | 1.463 up      | 2.784 up      | ABC1 family protein                                                                              |
| 79037 | + | + | + | + | + | + |               |               | asparagine synthase                                                                              |
| 79044 |   | + |   |   |   |   |               |               | GH47 α-1.2-mannosidase                                                                           |
| 79059 | + | + | + | + | + | + | 1.057 up      | 2.079 up      | Myo-inositol-1-phosphate synthase. associated to cellulase signal transduction (PMID: 15211111)  |
| 79075 | + | + | + | + | + | + |               |               | unknown protein of ORM1 family                                                                   |
| 79085 | + | + | + | + | + | + |               |               | unknown protein                                                                                  |
| 79089 | + | + | + | + | + | + |               |               | unknown protein                                                                                  |
| 79104 | + | + | + | + | + | + |               |               | Epsilon subunit of the coatomer complex. sec28                                                   |
| 79106 | + | + | + | + | + | + | 1.328 up      | 2.075 up      | 40s ribosomal protein L44e by homology to the corresponding protein of several yeasts and plants |
| 79109 | + | + | + | + | + | + |               |               | unknown protein                                                                                  |
| 79111 |   |   |   |   |   |   |               |               | unknown protein                                                                                  |
| 79116 |   |   |   |   |   |   |               |               | MFS permease                                                                                     |
| 79119 | + | + | + | + | + | + |               |               | unknown protein                                                                                  |
| 79124 | + | + | + | + | + | + |               |               | kinesin-like protein. a kinesin-3 family member.                                                 |
| 79129 | + | + | + |   |   |   |               |               | unknown protein                                                                                  |
| 79153 |   |   |   |   |   |   | 1.159<br>down | 2.901<br>down | HyuA. N-methylhydantoinase A/acetone carboxylase. beta subunit                                   |
| 79166 | + | + | + | + | + | + |               |               | SCP-2 sterol transfer family protein                                                             |
| 79169 | + | + | + | + | + | + |               |               | K <sup>+</sup> channel protein                                                                   |
| 79171 | + | + | + | + | + | + |               |               | Casein kinase 1Cki1. regulator of phosphatidylinositol 4-phosphate 5-kinase                      |
| 79174 | + | + | + | + | + | + |               |               | Emp24/gp25L/p24 family protein Erp1                                                              |

|       |   |   |   |   |   |   |             |            |                                                                                                   |
|-------|---|---|---|---|---|---|-------------|------------|---------------------------------------------------------------------------------------------------|
| 79187 | + | + | + | + | + | + | 2.070 up    | 2.371 up   | DNA polymerase alpha-primase complex. polymerase-associated subunit B                             |
| 79202 |   | + | + |   |   |   | 2.388 down  | 3.461 up   | MFS permease. associated with cellulose signalling                                                |
| 79222 |   |   |   |   |   |   | 13.373 down | 4.677 down | unknown protein                                                                                   |
| 79225 | + | + | + | + | + | + |             |            | DNA-directed RNA polymerase. beta subunit                                                         |
| 79229 | + | + | + | + | + | + | 1.497 up    | 2.508 up   | elongation factor G (Tu) and the LepA membrane protein family.                                    |
| 79235 | + |   | + | + |   |   |             |            | unknown protein                                                                                   |
| 79237 | + | + | + |   |   |   | 1.407 down  | 3.081 down | unknown protein                                                                                   |
| 79238 |   |   |   |   |   |   |             |            | unknown protein                                                                                   |
| 79244 |   | + | + |   |   |   |             |            | unknown protein                                                                                   |
| 79258 | + | + | + | + | + | + |             |            | phospholipid-translocating P-type ATPase                                                          |
| 79259 | + | + | + | + |   |   |             |            | unknown protein                                                                                   |
| 79262 | + | + | + | + | + | + |             |            | ATP synthase subunit E. putative                                                                  |
| 79271 | + | + | + | + |   | + | 1.162 down  | 3.028 down | malate synthase                                                                                   |
| 79287 | + | + | + | + | + | + |             |            | unknown protein                                                                                   |
| 79295 | + | + | + | + | + | + |             |            | ER membrane proteins involved in ER exit of secreted proteins.                                    |
| 79300 | + | + | + | + | + | + |             |            | unknown protein                                                                                   |
| 79304 | + | + | + |   |   |   |             |            | DNA repair endonuclease Rad2p of <i>Saccharomyces cerevisiae</i> and ERCC5 (XPG) of <i>Homo s</i> |
| 79315 | + | + | + | + | + | + |             |            | RNA polymerase Rpb1                                                                               |
| 79324 | + | + | + | + | + | + |             |            | nucleoside-diphosphate-sugar epimerase. putative (check!)                                         |
| 79326 | + | + | + | + | + | + |             |            | unknown protein                                                                                   |
| 79329 | + | + | + |   |   |   |             |            | MFS permease                                                                                      |
| 79334 | + | + | + | + | + | + |             |            | NADH-cytochrome b5 reductase. putative                                                            |
| 79344 | + | + | + | + | + | + |             |            | unknown protein                                                                                   |
| 79345 |   |   |   |   |   |   | 3.286 up    | 3.544 up   | unknown protein. Mpv17/PMP22 family                                                               |
| 79359 | + | + | + | + | + | + |             |            | unknown protein                                                                                   |
| 79361 |   | + | + |   |   |   | 2.257 up    | 2.408 up   | unknown protein                                                                                   |
| 79373 | + | + | + | + | + | + |             |            | adenine phosphoribosyltransferase                                                                 |

|       |   |   |   |   |   |   |               |               |                                                                                          |
|-------|---|---|---|---|---|---|---------------|---------------|------------------------------------------------------------------------------------------|
| 79377 | + | + | + | + | + | + |               |               | Sin3 complex subunit Stb2 based on homology to the corresponding proteins of Aspergillus |
| 79381 | + | + | + | + | + | + |               |               | RMD5. regulator of gluconeogenesis                                                       |
| 79395 | + | + | + | + | + | + |               |               | unknown protein                                                                          |
| 79396 | + | + | + | + | + | + | 2.453<br>down | 2.093<br>down | GT2 β-glycosyltransferase. related to hyaluronan synthases                               |
| 79398 | + | + | + | + | + | + |               |               | Ca2+ transporter                                                                         |
| 79405 | + | + | + | + | + | + |               |               | HET-containing protein. unknown                                                          |
| 79414 | + | + | + | + | + | + |               |               | transcriptional regulator NGG1. histone acetyltransferase subunit-3 like                 |
| 79419 | + | + | + | + | + | + |               |               | Polyubiquitin-binding protein Dsk2                                                       |
| 79426 |   |   |   |   |   |   | 1.416 up      | 2.139 up      | unknown protein                                                                          |
| 79430 |   |   |   |   |   |   |               |               | unknown protein                                                                          |
| 79439 | + | + | + | + | + | + |               |               | acetyl-CoA acetyltransferase                                                             |
| 79441 | + | + | + | + | + | + |               |               | histone deacetylase complex subunit                                                      |
| 79448 | + | + | + | + | + | + |               |               | HFBs                                                                                     |
| 79459 | + | + | + | + | + | + |               |               | Myristoyl-CoA:protein N-myristoyltransferase (nmt)                                       |
| 79461 | + | + | + | + | + | + | 1.603<br>down | 2.087<br>down | unknown protein                                                                          |
| 79464 | + | + | + | + | + | + |               |               | unknown protein                                                                          |
| 79466 | + | + | + | + | + | + |               |               | unknown protein                                                                          |
| 79485 | + | + | + | + | + | + |               |               | peptidase (PNG1)                                                                         |
| 79487 | + | + | + | + | + | + | 1.260 up      | 2.392 up      | Mannose-P-dolichol utilization defect 1 protein                                          |
| 79490 | + | + | + | + | + | + |               |               | unknown protein                                                                          |
| 79495 | + | + | + | + | + | + |               |               | Isopropylmalate/homocitrate/citramalate synthases                                        |
| 79498 |   | + | + |   |   |   |               |               | NoxA                                                                                     |
| 79501 | + | + | + |   |   |   |               |               | unknown protein                                                                          |
| 79503 | + | + | + | + | + | + |               |               | casein kinase II. alpha subunit                                                          |
| 79510 | + | + | + | + | + | + |               |               | MRP-type ABC transporter                                                                 |
| 79535 | + | + | + | + | + | + |               |               | serine/threonine protein phosphatase                                                     |
| 79545 | + | + | + | + | + | + |               |               | Dioxygenases related to -nitropropane dioxygenase                                        |
| 79560 | + | + | + | + | + | + |               |               | unknown protein                                                                          |

|       |   |   |   |   |   |   |            |            |                                                                 |
|-------|---|---|---|---|---|---|------------|------------|-----------------------------------------------------------------|
| 79565 | + | + | + | + | + | + | 1.870 up   | 2.302 up   | Thioredoxin reductase TrxB                                      |
| 79568 | + | + | + | + | + | + |            |            | UDP-N-acetylglucosamine pyrophosphorylase                       |
| 79598 | + | + | + | + | + | + |            |            | unknown protein                                                 |
| 79599 | + | + | + | + | + | + |            |            | Ca <sup>2+</sup> transporter                                    |
| 79602 |   |   |   |   |   |   | 1.010 up   | 4.513 down | GH81 endo-1.3-β-glucanase                                       |
| 79606 |   |   |   |   |   |   | 1.639 down | 2.177 down | GH115 xylan-α-1.2-glucuronidase or α-(4-O-methyl)-glucuronidase |
| 79619 | + | + | + | + | + | + |            |            | unknown protein                                                 |
| 79623 | + | + | + | + | + | + |            |            | pre-rRNA-processing protein TSR2 . putative                     |
| 79627 | + | + | + | + | + | + |            |            | unknown protein                                                 |
| 79644 | + | + | + |   |   |   | 1.424 down | 2.247 up   | metal ion transporter SMF2                                      |
| 79661 |   |   |   |   |   |   | 1.018 up   | 2.319 down | unknown protein                                                 |
| 79669 |   |   |   |   |   |   |            |            | GH3 β-N-acetylglucosaminidase                                   |
| 79671 |   |   |   |   |   |   |            |            | N-acetyl-glucosamine-6-phosphate deacetylase                    |
| 79673 | + | + | + | + | + | + |            |            | PhoG                                                            |
| 79677 |   |   |   |   |   |   |            |            | unknown protein                                                 |
| 79686 | + | + | + | + | + | + |            |            | Unknown protein with RNA binding domains                        |
| 79690 | + | + | + | + | + | + |            |            | Electron transfer flavoprotein-ubiquinone oxidoreductase        |
| 79694 | + | + | + | + | + | + |            |            | fructosyl amino acid oxidases                                   |
| 79708 |   | + |   |   |   |   |            |            | unknown protein                                                 |
| 79725 |   |   |   |   |   |   | 1.094 down | 3.115 down | Zn2Cys6 transcriptional regulator                               |
| 79726 |   |   |   |   |   |   | 7.847 up   | 9.055 up   | unknown protein                                                 |
| 79737 |   |   |   |   |   |   |            |            | Maleylacetoacetate isomerase. putative                          |
| 79738 |   |   |   |   |   |   |            |            | Zinc-binding oxidoreductase                                     |
| 79741 | + | + | + | + |   | + | 1.807 down | 2.212 up   | ER-bound Farnesyl-diphosphate farnesyltransferase               |
| 79746 | + | + | + | + | + | + |            |            | has high homology to microtubule associated proteins.           |

|       |   |   |   |   |   |   |   |            |            |                                                                                        |
|-------|---|---|---|---|---|---|---|------------|------------|----------------------------------------------------------------------------------------|
| 79749 |   | + | + | + | + | + | + |            |            | G-patch domain-containing protein                                                      |
| 79756 |   | + | + | + | + | + | + | 1.166 up   | 2.416 down | F-Box/WD40 repeat protein FWD-1. targets the clock component FRQ for degradation       |
| 79761 |   |   |   | + | + |   |   |            |            | unknown protein                                                                        |
| 79769 |   | + | + | + | + | + | + |            |            | Cytochrome c and c1 heme-lyase. shares homology to Protein prenyltransferase. alpha su |
| 79774 |   | + | + | + | + | + | + |            |            | unknown protein                                                                        |
| 79779 |   |   |   |   |   |   |   | 1.626 up   | 5.436 up   | unknown protein                                                                        |
| 79782 |   | + | + | + | + | + | + |            |            | BioF -keto--aminopelargonate synthetase and related enzymes                            |
| 79797 |   | + | + | + | + | + | + |            |            | unknown protein                                                                        |
| 79807 |   | + | + | + | + | + | + | 1.096 down | 2.083 down | Aspartic type endopeptidase ctsD                                                       |
| 79813 |   |   |   |   |   |   |   |            |            | flavoprotein monooxygenases                                                            |
| 79816 |   |   |   |   |   |   |   | 1.212 down | 3.680 up   | unknown protein; secreted                                                              |
| 79817 |   | + | + | + | + | + | + |            |            | unknown protein                                                                        |
| 79823 |   | + |   |   |   |   |   | 1.320 down | 2.100 down | DCL2. Dicer-like protein. involved in quelling                                         |
| 79825 |   | + | + | + | + | + | + |            |            | 20S proteasome beta-type subunit Pre8                                                  |
| 79828 |   | + | + | + | + | + | + |            |            | unknown protein. 3 TM                                                                  |
| 79832 |   | + | + | + | + | + | + |            |            | GT $\alpha$ -1.6-mannosyltransferase                                                   |
| 79835 |   | + | + | + | + | + | + |            |            | GadB Glutamate decarboxylase and related PLP-dependent proteins                        |
| 79843 |   |   |   |   |   |   |   |            |            | hsp70 protein                                                                          |
| 79850 | + | + | + | + | + | + | + |            |            | Phosphotyrosyl phosphatase activator. PTPA                                             |
| 79854 |   | + | + | + | + | + | + |            |            | CCR4-NOT core complex subunit Not4                                                     |
| 79871 |   | + | + | + | + | + | + |            |            | Zn2Cys6 transcriptional regulator                                                      |
| 79884 |   | + | + | + | + | + | + |            |            | Neddylin (ubiquitin-like protein).                                                     |
| 79891 |   | + | + | + | + | + | + |            |            | Vesicle coat complex COPII. Sec13                                                      |
| 79895 |   | + | + | + | + | + | + |            |            | serine/threonine protein kinase kin1 involved in cellular morphogenesis                |
| 79919 |   | + | + | + | + | + | + |            |            | unknown protein                                                                        |
| 79921 |   |   | + | + |   |   |   |            |            | GH92 $\alpha$ -1.2-mannosidase                                                         |
| 79931 |   | + | + | + |   |   |   |            |            | unknown protein                                                                        |



|       |   |   |   |   |   |   |             |            |                                                                                                           |
|-------|---|---|---|---|---|---|-------------|------------|-----------------------------------------------------------------------------------------------------------|
| 79933 | + | + | + | + | + | + | 1.273 up    | 3.151 up   | mitochondrial ribosomal protein MRPL6.                                                                    |
| 79946 | + | + | + | + | + | + |             |            | multisynthetase complex auxiliary component p43                                                           |
| 79947 | + | + | + | + | + | + | 1.257 down  | 2.543 up   | DNA-dependent RNA polymerase                                                                              |
| 79955 | + | + | + | + | + | + |             |            | UDP glucose-4-epimerase                                                                                   |
| 79960 |   |   | + | + |   | + | 3.156 up    | 2.894 up   | GH47 $\alpha$ -1.2-mannosidase                                                                            |
| 79972 | + | + | + | + | + | + |             |            | unknown protein                                                                                           |
| 79974 | + | + | + | + | + | + |             |            | Palmitoyltransferase ERF2                                                                                 |
| 79990 |   |   |   |   |   |   |             |            | unknown protein                                                                                           |
| 79993 | + | + | + | + | + | + |             |            | T-complex protein 1                                                                                       |
| 80003 | + | + | + |   |   |   |             |            | Phosphoglycerate dehydrogenase and related dehydrogenases                                                 |
| 80005 | + | + | + | + | + | + |             |            | unknown protein                                                                                           |
| 80007 | + | + | + | + | + | + |             |            | Like Rad54; interacts with Dmc1                                                                           |
| 80019 |   |   |   |   |   |   | 1.739 up    | 2.366 up   | short-chain dehydrogenase/reductase                                                                       |
| 80022 | + | + | + | + | + | + |             |            | unknown protein                                                                                           |
| 80025 | + | + | + | + | + | + |             |            | ribosomal protein S17e. and it shares extensive amino acid sequence identity with ribosomal protein S17e. |
| 80026 |   |   | + |   |   |   | 2.194 up    | 3.143 up   | MFS permease                                                                                              |
| 80028 |   |   |   |   |   |   |             |            | MRP-type ABC transporter                                                                                  |
| 80034 |   |   |   |   |   |   | 1.226 up    | 2.088 down | DadA Glycine/D-amino acid oxidases (deaminating) [Amino acid transport and metabolism]                    |
| 80042 | + | + | + | + | + | + |             |            | unknown protein. 1 TM                                                                                     |
| 80048 | + | + | + | + | + | + |             |            | phosducin like protein class II                                                                           |
| 80052 | + | + | + | + |   | + |             |            | unknown protein                                                                                           |
| 80056 |   |   |   |   |   |   | 2.072 up    | 3.390 up   | RNA 3'-terminal phosphate cyclase . putative                                                              |
| 80058 |   |   |   |   |   |   | 11.514 down | 4.257 down | MFS permease                                                                                              |
| 80073 | + | + | + | + | + | + |             |            | unknown protein                                                                                           |
| 80086 |   |   | + |   |   |   |             |            | MFS peptide transporter                                                                                   |
| 80091 |   |   |   |   |   |   |             |            | quininate permease                                                                                        |
| 80096 | + | + | + | + |   |   | 1.083 down  | 2.464 down | unknown protein                                                                                           |

|       |   |   |   |   |   |   |            |            |                                                                            |
|-------|---|---|---|---|---|---|------------|------------|----------------------------------------------------------------------------|
| 80105 |   |   |   |   |   |   | 1.011 up   | 2.166 down | unknown protein                                                            |
| 80115 |   |   |   |   |   |   |            |            | unknown protein                                                            |
| 80122 |   |   |   |   |   |   |            |            | unknown protein                                                            |
| 80125 | + | + | + | + | + | + |            |            | GPCR. related to <i>N. crassa</i> Stm1-like GPR-5                          |
| 80137 |   |   |   |   |   |   | 1.188 down | 2.247 down | unknown protein                                                            |
| 80139 |   |   |   |   |   |   |            |            | Zn2Cys6 transcriptional regulator                                          |
| 80142 | + | + | + | + | + | + |            |            | HSP104 and related ATP-dependent Clp proteases                             |
| 80149 | + | + | + |   |   |   |            |            | unknown protein.                                                           |
| 80151 |   |   |   |   |   |   |            |            | PheA Prephenate dehydratase                                                |
| 80159 | + | + | + | + | + | + |            |            | DNA-directed DNA polymerase B                                              |
| 80167 | + | + | + | + | + | + | 1.362 up   | 2.118 up   | histone H4 variant                                                         |
| 80168 | + | + | + | + | + | + |            |            | unknown protein                                                            |
| 80181 | + | + | + | + | + | + |            |            | unknown protein                                                            |
| 80186 | + | + | + | + | + | + |            |            | MAPKK. hypothetical MAP kinase kinase Pbs2p                                |
| 80187 | + | + | + | + | + | + |            |            | unknown protein. 8TM (auxin efflux carrier)                                |
| 80191 | + | + | + | + | + | + |            |            | steryl ester lipase TPL1                                                   |
| 80200 | + | + | + | + | + | + |            |            | transcription factor (Snd1/p100)                                           |
| 80206 | + | + | + | + | + | + |            |            | unknown protein                                                            |
| 80211 | + | + | + | + | + | + | 1.450 up   | 6.721 up   | ribosomal protein L14.                                                     |
| 80216 | + | + | + | + | + | + |            |            | ATP synthase D chain. mitochondrial                                        |
| 80231 | + | + | + | + | + | + |            |            | glucokinase                                                                |
| 80234 | + | + | + | + | + | + |            |            | unknown protein                                                            |
| 80237 |   |   |   |   |   |   |            |            | intermembrane peptidase                                                    |
| 80240 |   |   |   |   |   |   |            |            | GH35 $\beta$ -galactosidase BGA1                                           |
| 80243 | + | + | + | + | + | + |            |            | SRP receptor. alphaSubunit                                                 |
| 80245 | + | + | + | + | + | + |            |            | Membrane protein. yif1. involved in biogenesis of COPII transport vesicles |
| 80252 |   |   |   |   |   |   |            |            | unknown protein. in <i>Sordariomycetes</i>                                 |
| 80265 | + | + | + | + | + | + |            |            | unknown protein                                                            |

|       |   |   |   |   |   |   |            |            |                                                                                           |
|-------|---|---|---|---|---|---|------------|------------|-------------------------------------------------------------------------------------------|
| 80268 | + | + | + | + | + | + |            |            | fumarate lyase                                                                            |
| 80273 |   |   |   |   |   |   |            |            | phosphatidylinositol polyphosphate phosphatase                                            |
| 80277 | + | + | + | + | + | + |            |            | Rho-guanyl nucleotide exchange factor                                                     |
| 80282 | + | + | + | + | + | + |            |            | unknown protein                                                                           |
| 80288 | + | + | + | + | + | + | 1.203 up   | 2.718 up   | cytochrome c oxidase polypeptide V                                                        |
| 80291 |   |   |   |   |   |   | 1.110 down | 2.580 down | Zn2Cys6 transcriptional regulator                                                         |
| 80292 | + | + | + | + | + | + |            |            | DSPc. Dual specificity phosphatases (DSP)                                                 |
| 80310 | + | + | + | + | + | + |            |            | vacuolar protein sorting protein Vps66. putative                                          |
| 80312 | + | + | + | + | + | + |            |            | unknown protein                                                                           |
| 80326 | + | + | + | + | + | + |            |            | 19S regulatory particle ATPase Rpt2                                                       |
| 80332 | + | + | + | + | + | + |            |            | mitochondrial carrier protein. putative                                                   |
| 80335 |   |   |   |   |   |   |            |            | unknown protein                                                                           |
| 80339 | + | + | + | + | + | + |            |            | unknown protein                                                                           |
| 80340 |   | + | + |   | + |   | 5.037 up   | 6.295 up   | GT $\alpha$ -1.6-mannosyltransferase                                                      |
| 80359 | + | + | + | + | + | + |            |            | unknown protein                                                                           |
| 80365 | + | + | + | + | + | + | 1.112 up   | 2.200 down | unknown protein                                                                           |
| 80398 | + | + | + | + | + | + |            |            | importin $\beta$ KapC                                                                     |
| 80400 | + | + | + | + | + | + |            |            | Ubiquitin C-terminal hydrolase                                                            |
| 80403 | + | + | + | + | + | + |            |            | unknown protein                                                                           |
| 80415 | + | + | + | + | + | + |            |            | vacuolar sorting protein. vps3. and TGF beta receptor associated protein 1                |
| 80425 | + | + | + | + | + | + | 1.363 down | 2.221 down | unknown protein                                                                           |
| 80432 | + | + | + | + | + | + |            |            | half-sized ABC transporter                                                                |
| 80437 | + | + | + |   |   |   |            |            | unknown protein                                                                           |
| 80441 | + | + | + | + | + | + | 1.469 up   | 2.322 up   | unknown protein                                                                           |
| 80447 | + | + | + | + | + | + |            |            | calmodulin is involved in control of enzymes by Ca(2+). stimulates many protein kinases a |
| 80475 |   |   |   |   |   |   |            |            | unknown protein                                                                           |
| 80484 | + | + | + | + | + | + |            |            | unknown protein                                                                           |

|       |   |   |   |   |   |   |                |               |                                                                        |
|-------|---|---|---|---|---|---|----------------|---------------|------------------------------------------------------------------------|
| 80498 | + | + | + | + | + | + |                |               | Nucleosome assembly protein NAP-1                                      |
| 80499 |   |   |   |   |   |   |                |               | POS9-activating factor FAP7                                            |
| 80509 | + | + | + | + | + | + |                |               | Cyclopropane-fatty-acyl-phospholipid synthase                          |
| 80515 | + | + | + | + | + | + |                |               | 60S ribosome biogenesis protein Mak11. putative                        |
| 80523 | + | + | + |   |   |   | 1.208<br>down  | 2.604<br>down | pH-response regulator protein paIC                                     |
| 80528 |   |   |   |   |   |   | 3.962 up       | 2.091 up      | Gβ-WD40 protein                                                        |
| 80538 | + | + | + | + | + | + |                |               | Eukaryotic translation initiation factor 3 subunit H (eIF3h). putative |
| 80553 | + | + | + | + | + | + | 1.083<br>down  | 2.260<br>down | ADP-ribosylation factor like protein                                   |
| 80578 |   |   |   |   |   |   |                |               | unknown protein                                                        |
| 80579 | + | + | + | + | + | + |                |               | unknown protein                                                        |
| 80584 | + | + | + | + | + | + |                |               | Oligosaccharyltransferase. beta subunit                                |
| 80586 | + | + | + | + | + | + |                |               | unknown protein                                                        |
| 80592 | + | + | + | + | + | + |                |               | unknown protein                                                        |
| 80593 | + | + | + | + | + | + |                |               | unknown protein                                                        |
| 80594 | + | + | + | + | + | + |                |               | unknown protein                                                        |
| 80597 | + | + | + | + | + | + |                |               | unknown protein                                                        |
| 80605 | + | + | + | + | + | + |                |               | unknown protein                                                        |
| 80607 |   |   |   |   |   |   |                |               | short chain dehydrogenase/reductase                                    |
| 80621 | + | + | + | + | + | + |                |               | 2-methylcitrate synthase                                               |
| 80627 | + | + | + | + | + | + |                |               | unknown protein                                                        |
| 80636 |   |   |   |   |   |   | 1.232<br>down  | 2.196<br>down | unknown protein                                                        |
| 80639 |   |   |   |   |   |   | 2.616 up       | 4.050 up      | iron transporter                                                       |
| 80645 |   |   |   |   |   |   | 1.004<br>down  | 3.596<br>down | Amidase                                                                |
| 80654 |   |   |   |   |   |   | 11.701<br>down | 3.854<br>down | UDP-glucuronosyl and UDP-glucosyl transferase                          |
| 80659 |   |   |   |   |   |   | 97.770<br>down | 5.813<br>down | alcohol oxidase AOX1                                                   |

|       |   |   |   |   |   |   |               |               |                                                                                                  |
|-------|---|---|---|---|---|---|---------------|---------------|--------------------------------------------------------------------------------------------------|
| 80668 | + | + | + | + | + | + | 1.769<br>down | 3.231<br>down | Zn2Cys6 transcriptional regulator                                                                |
| 80672 | + | + | + | + | + | + |               |               | cation efflux family protein. putative                                                           |
| 80680 | + | + | + | + | + | + |               |               | unknown protein                                                                                  |
| 80685 |   |   |   |   |   |   | 1.314 up      | 4.278<br>down | unknown protein                                                                                  |
| 80691 | + | + | + | + | + | + |               |               | unknown protein                                                                                  |
| 80695 | + | + | + | + | + | + | 1.119 up      | 2.036<br>down | half-sized ABC transporter                                                                       |
| 80709 | + | + | + | + | + | + |               |               | pre-mRNA-splicing factor CWC21. putative                                                         |
| 80713 | + | + | + | + | + | + |               |               | GTPase activating protein for Rho subfamily of RAS smallGTPases. related to <i>S. cerevisiae</i> |
| 80714 |   |   |   |   |   |   | 1.174 up      | 2.611<br>down | Dolichyl-phosphate-mannose a-mannosyltransferase                                                 |
| 80716 | + | + | + | + | + | + |               |               | ornithine aminotransferase                                                                       |
| 80725 | + | + | + | + | + | + |               |               | unknown protein                                                                                  |
| 80732 | + | + | + | + | + | + |               |               | histone H3 lysine 36 (K36) methyltransferase                                                     |
| 80733 |   |   |   |   |   |   | 1.493 up      | 2.345 up      | unknown protein                                                                                  |
| 80741 |   |   |   |   |   |   |               |               | unknown protein                                                                                  |
| 80743 | + | + | + | + | + | + |               |               | unknown protein                                                                                  |
| 80746 |   |   |   |   |   |   |               |               | aryl-alcohol oxidase                                                                             |
| 80748 | + | + | + | + | + | + |               |               | RNA polymerase I specific transcription stimulatory factor composed of Uaf30p                    |
| 80756 |   |   |   |   |   |   |               |               | unknown protein                                                                                  |
| 80758 | + | + | + | + | + | + | 1.095<br>down | 2.026<br>down | serine/threonine protein kinase nrc2                                                             |
| 80761 | + | + | + | + | + | + |               |               | seryl-tRNA synthetase. class IIa.                                                                |
| 80762 | + | + | + | + | + | + |               |               | ubiquitin carboxyl-terminal hydrolase. family 1                                                  |
| 80767 | + | + | + | + | + | + |               |               | MFS permease                                                                                     |
| 80771 | + | + | + | + | + | + |               |               | unknown protein                                                                                  |
| 80775 | + | + | + | + | + | + |               |               | calcium dependent mitochondrial carrier protein. putative                                        |
| 80778 |   |   |   |   |   |   |               |               | alpha/beta hydrolase                                                                             |
| 80784 | + | + | + | + | + | + |               |               | unknown protein                                                                                  |

|       |   |  |   |   |   |   |   |   |   |  |               |  |               |  |                                                        |
|-------|---|--|---|---|---|---|---|---|---|--|---------------|--|---------------|--|--------------------------------------------------------|
| 80788 |   |  |   | + | + | + | + | + | + |  |               |  |               |  | Peroxisomal membrane anchor protein (Pex14p). putative |
| 80792 | + |  | + | + | + | + | + | + | + |  |               |  |               |  | brix domain-containing protein                         |
| 80797 |   |  |   |   |   |   |   |   |   |  |               |  |               |  | histone deacetylase                                    |
| 80806 |   |  |   | + | + | + | + | + | + |  |               |  |               |  | unknown protein                                        |
| 80807 |   |  |   |   |   |   | + |   |   |  |               |  |               |  | unknown protein                                        |
| 80813 |   |  |   |   | + | + |   |   |   |  |               |  |               |  | unknown protein                                        |
| 80820 |   |  |   | + | + | + | + | + | + |  |               |  |               |  | HisG ATP phosphoribosyltransferase                     |
| 80825 |   |  |   | + | + | + | + | + | + |  |               |  |               |  | unknown protein                                        |
| 80833 |   |  |   |   |   |   |   |   |   |  |               |  |               |  | GH18 chitinase Chi18-5                                 |
| 80835 |   |  |   | + | + | + | + | + | + |  |               |  |               |  | SWI/SNF complex protein                                |
| 80843 |   |  |   | + | + | + | + | + | + |  | 1.043<br>down |  | 2.809 up      |  | 26S proteasome regulatory complex subunit Rpn8         |
| 80854 |   |  |   | + | + | + | + | + | + |  |               |  |               |  | ribosomal protein MRPL24.                              |
| 80863 |   |  |   | + | + | + |   |   |   |  |               |  |               |  | unknown protein                                        |
| 80867 |   |  |   | + | + | + | + | + | + |  |               |  |               |  | unknown protein                                        |
| 80870 |   |  |   | + | + | + | + | + | + |  |               |  |               |  | unknown protein                                        |
| 80871 |   |  |   |   |   |   |   |   |   |  | 1.732<br>down |  | 3.483<br>down |  | unknown protein                                        |
| 80872 |   |  |   | + | + | + | + | + | + |  |               |  |               |  | phosphoribosylamine-glycine ligase                     |
| 80875 |   |  |   | + | + | + | + | + | + |  | 1.465 up      |  | 4.312<br>down |  | MFS permease                                           |
| 80879 |   |  |   | + |   | + | + |   |   |  |               |  |               |  | MFS H+/oligopeptide transporter                        |
| 80881 |   |  |   | + | + | + | + | + | + |  |               |  |               |  | GDP-forming succinate-CoA ligase. beta subunit         |
| 80890 |   |  |   | + | + | + | + | + | + |  |               |  |               |  | 3' exoribonuclease                                     |
| 80898 |   |  |   | + | + | + | + | + | + |  |               |  |               |  | Secretion related small GTPase Rab1/Ypt1               |
| 80904 |   |  |   | + | + | + | + | + | + |  |               |  |               |  | unknown protein                                        |
| 80911 |   |  |   | + | + | + |   |   |   |  |               |  |               |  | tripeptide peptidase                                   |
| 80920 |   |  |   | + | + | + |   |   | + |  |               |  |               |  | ADH1                                                   |
| 80922 |   |  |   | + | + | + | + | + | + |  |               |  |               |  | unknown protein                                        |
| 80932 |   |  |   | + | + | + | + | + | + |  |               |  |               |  | Cytochrome c oxidase assembly protein CtaG/Cox11       |

|       |   |   |   |   |   |   |                |               |  |                                                                                             |
|-------|---|---|---|---|---|---|----------------|---------------|--|---------------------------------------------------------------------------------------------|
| 80941 | + | + | + |   |   |   |                |               |  | TRNA pseudouridine synthase.                                                                |
| 80956 | + | + | + | + | + | + |                |               |  | RNA recognition protein. RNP-1                                                              |
| 80958 | + | + | + | + | + | + |                |               |  | phosphatidylserine decarboxylase proenzyme 2 precursor                                      |
| 80961 | + | + | + | + | + | + |                |               |  | unknown protein                                                                             |
| 80973 |   |   |   |   |   |   |                |               |  | PDR-type ABC transporters                                                                   |
| 80980 |   |   |   |   |   |   | 5.500 up       | 4.778 up      |  | peptidyl arginine deiminase                                                                 |
| 80990 | + | + | + | + | + | + |                |               |  | unknown protein                                                                             |
| 80994 | + | + | + | + | + | + |                |               |  | N-acetylglucosamine-phosphate mutase                                                        |
| 80997 | + | + | + | + | + | + |                |               |  | HNRNP arginine N-methyltransferase                                                          |
| 81001 | + | + | + | + | + | + |                |               |  | Rps8 gene based on similarity to NSA2 gene of yeast that confersResistance to killer toxin. |
| 81004 |   |   |   |   |   |   | 1.369<br>down  | 2.202<br>down |  | aspartyl protease                                                                           |
| 81007 | + | + | + | + | + | + |                |               |  | serine/threonine-protein kinase RIO1                                                        |
| 81014 |   | + |   |   |   |   |                |               |  | NRPS                                                                                        |
| 81019 |   | + |   |   |   |   | 1.642<br>down  | 5.665<br>down |  | Zinc-containing alcohol dehydrogenase                                                       |
| 81022 |   |   |   |   |   |   | 1.047 up       | 3.411<br>down |  | allantoate permease. 10 TM domains                                                          |
| 81043 | + | + | + | + | + | + |                |               |  | DNA directed RNA polymerase II 15 kDa subunit. putative                                     |
| 81049 |   |   |   |   |   |   |                |               |  | C-14 sterol reductase                                                                       |
| 81058 | + | + | + | + | + | + | 2.175<br>down  | 3.544<br>down |  | peptidase family S58                                                                        |
| 81070 | + | + | + | + | + | + |                |               |  | amidase                                                                                     |
| 81082 |   |   |   |   |   |   | 11.207 up      | 25.313 up     |  | aquaglyceroporin                                                                            |
| 81087 |   |   | + |   |   |   | 10.395<br>down | 3.035 up      |  | aminopeptidase Y                                                                            |
| 81089 | + | + | + | + | + | + |                |               |  | CysK. Cysteine synthase; aa370-414 cd02205. CBS domain                                      |
| 81093 | + | + | + | + | + | + |                |               |  | unknown protein                                                                             |
| 81096 |   |   |   |   |   |   | 1.024 up       | 14.686 up     |  | ferric reductase                                                                            |
| 81097 | + | + | + | + | + | + |                |               |  | unknown protein with TLC domain                                                             |
| 81102 | + |   | + | + |   |   |                |               |  | unknown protein                                                                             |

|       |   |   |   |   |   |   |               |               |                                                |
|-------|---|---|---|---|---|---|---------------|---------------|------------------------------------------------|
| 81105 | + | + | + | + | + | + |               |               | unknown protein                                |
| 81109 | + | + | + | + | + | + |               |               | unknown protein                                |
| 81110 | + | + | + | + | + | + |               |               | acetyl-CoA carboxylase                         |
| 81115 | + | + | + | + | + | + |               |               | Peptidase D                                    |
| 81122 |   |   |   |   |   |   |               |               | unknown protein. 4 TM. only in Sordariomycetes |
| 81125 | + | + | + | + | + | + | 2.107<br>down | 2.495<br>down | Amino acid permease                            |
| 81136 | + | + | + | + | + | + |               |               | serine/threonine phosphatase 2 C. PTC2         |
| 81139 | + | + | + | + | + | + |               |               | ribosomal protein S4.                          |
| 81140 | + | + | + | + | + | + |               |               | Ribosomal protein S18.                         |
| 81148 |   | + |   |   |   |   |               |               | short chain dehydrogenase/reductase            |
| 81149 | + | + | + | + | + | + |               |               | aquaglyceroporin                               |
| 81150 |   |   |   |   |   |   | 1.513 up      | 2.272<br>down | unknown protein                                |
| 81164 | + | + | + | + | + | + |               |               | Protein phosphatase type 2C Ptc2               |
| 81174 | + | + | + | + | + | + |               |               | unknown protein                                |
| 81183 | + | + | + | + | + | + | 1.134<br>down | 2.366<br>down | unknown protein                                |
| 81188 | + | + | + |   |   |   |               |               | HisF Imidazoleglycerol-phosphate synthase      |
| 81211 | + | + | + | + | + | + |               |               | GT $\alpha$ -1.6-mannosyltransferase           |
| 81214 | + | + | + | + | + | + |               |               | unknown protein                                |
| 81219 |   | + |   |   |   |   |               |               | Serine/threonine protein kinase                |
| 81226 | + | + | + | + | + | + |               |               | unknown protein                                |
| 81239 |   |   |   |   |   |   |               |               | GDP-mannose transporter                        |
| 81259 | + | + | + | + | + | + |               |               | unknown protein                                |
| 81260 | + | + | + | + | + | + |               |               | adenylate kinase                               |
| 81263 | + | + | + | + | + | + |               |               | ER lumen protein retaining receptor Erd2       |
| 81271 | + | + | + | + | + | + | 2.399 up      | 3.113 up      | xylitol dehydrogenase XDH1                     |
| 81275 | + | + | + |   |   |   | 2.360<br>down | 3.247<br>down | phytanoyl-CoA dioxygenase family protein       |
| 81291 | + | + | + | + | + | + |               |               | unknown protein                                |



|       |   |   |   |   |   |   |            |            |                                                                |
|-------|---|---|---|---|---|---|------------|------------|----------------------------------------------------------------|
| 81296 | + | + | + | + | + | + |            |            | SSCRP                                                          |
| 81303 | + | + | + | + | + | + |            |            | fumarate reductase                                             |
| 81328 |   | + |   |   |   |   |            |            | unknown protein. only in fungi                                 |
| 81329 | + | + | + | + | + | + |            |            | unknown protein                                                |
| 81331 |   | + | + |   |   |   |            |            | SSCRP                                                          |
| 81339 | + | + | + | + | + | + |            |            | glycine dehydrogenase                                          |
| 81343 | + | + | + | + | + | + |            |            | unknown protein                                                |
| 81348 | + | + | + | + | + | + |            |            | amino acid transporter                                         |
| 81362 | + | + | + | + | + | + | 1.290 up   | 2.199 up   | Lipoate synthase                                               |
| 81383 |   |   |   |   |   |   | 3.063 up   | 6.292 up   | GPCR . contains RGS domain                                     |
| 81389 | + | + | + | + | + | + | 3.699 down | 4.788 down | phosphate/H+ symporter                                         |
| 81405 | + | + | + | + | + | + |            |            | unknown protein                                                |
| 81410 | + | + | + | + |   | + |            |            | unknown protein                                                |
| 81416 | + | + | + | + | + | + |            |            | unknown protein                                                |
| 81420 | + | + | + | + |   |   | 2.875 down | 2.643 down | Argonaute siRNA chaperone (ARC) complex subunit                |
| 81423 | + | + | + | + | + | + | 1.091 down | 2.463 up   | unknown protein                                                |
| 81430 | + | + | + | + | + | + |            |            | Cation transporting ATPase                                     |
| 81442 |   |   |   |   |   |   |            |            | Amino acid transporters                                        |
| 81447 | + | + | + | + | + | + |            |            | GTP-binding protein YchF                                       |
| 81450 | + | + | + | + | + | + |            |            | Mitochondrial import inner membrane translocase. subunit Tim44 |
| 81454 | + | + | + | + | + |   | 1.024 down | 2.735 down | unknown protein                                                |
| 81457 | + | + | + | + | + | + |            |            | unknown protein                                                |
| 81460 |   | + |   |   |   |   |            |            | unknown protein. secreted                                      |
| 81465 | + | + | + | + | + | + |            |            | unknown protein                                                |
| 81473 | + | + | + | + | + | + | 1.282 up   | 2.031 up   | caffeine-induced death protein 2                               |
| 81511 |   |   |   |   |   |   | 1.824 down | 2.453 down | formamidase                                                    |

|       |   |   |   |   |   |   |   |   |   |                                                                   |
|-------|---|---|---|---|---|---|---|---|---|-------------------------------------------------------------------|
| 81517 |   |   |   | + | + | + | + | + | + | unknown protein                                                   |
| 81522 |   |   |   | + | + | + | + | + | + | Selenocysteine lyase-like protein                                 |
| 81525 |   |   |   |   |   |   |   |   |   | isoflavone reductase                                              |
| 81536 |   |   |   | + | + | + | + | + |   | cation transporting ATPase                                        |
| 81541 |   |   |   | + |   | + |   |   |   | unknown protein                                                   |
| 81546 |   |   |   | + | + | + | + | + | + | sulfate transporter                                               |
| 81553 |   |   |   |   |   |   |   |   |   | short chain dehydrogenase/reductase                               |
| 81565 |   |   |   | + | + | + | + | + | + | C2HC5 finger protein                                              |
| 81570 | + | + | + | + | + | + | + | + | + | Homoaconitase catalytic domain                                    |
| 81576 |   |   |   | + | + | + | + |   | + | Assimilatory sulfite reductase.Alpha subunit                      |
| 81586 |   |   |   |   | + |   |   |   |   | unknown protein                                                   |
| 81591 |   |   |   |   |   |   |   |   |   | unknown protein                                                   |
| 81593 |   |   |   | + | + | + | + | + | + | MFS permease                                                      |
| 81598 |   |   |   |   |   |   |   |   |   | GH18. chitinase CHI18-7                                           |
| 81599 |   |   |   | + | + | + | + | + | + | pre-rRNA processing nucleolar protein Sik1. putative              |
| 81609 |   |   |   | + | + | + |   |   |   | 1.338<br>down 2.033<br>down GH15                                  |
| 81616 |   |   |   | + |   | + | + |   |   | unknown protein                                                   |
| 81623 |   |   |   |   |   |   |   |   |   | 1.859<br>down 2.465<br>down unknown protein. only in Hypocreaceae |
| 81630 |   |   |   | + | + | + | + | + | + | unknown protein                                                   |
| 81646 |   |   |   | + | + | + | + | + | + | 1.513<br>down 2.238<br>down NADPH oxidase                         |
| 81649 |   |   |   |   |   |   |   |   |   | Flavin-containing monooxygenase                                   |
| 81652 |   |   |   |   |   |   |   |   |   | unknown protein                                                   |
| 81659 |   |   |   |   |   |   |   |   |   | 10.047<br>down 3.646<br>down unknown protein                      |
| 81661 |   |   |   | + | + | + | + | + | + | GT $\beta$ -glycosyltransferases                                  |
| 81668 |   |   |   |   |   |   |   |   |   | unknown protein                                                   |
| 81670 |   |   |   | + | + | + |   |   |   | MFS permease                                                      |

|       |   |   |   |   |   |   |               |               |                                                                                                              |
|-------|---|---|---|---|---|---|---------------|---------------|--------------------------------------------------------------------------------------------------------------|
| 81676 |   |   |   |   |   |   | 1.496<br>down | 5.583<br>down | salicylate hydroxylase                                                                                       |
| 81679 |   | + | + |   |   |   |               |               | Flavoprotein monooxygenase. putative                                                                         |
| 81688 | + | + | + | + | + | + |               |               | unknown protein                                                                                              |
| 81690 | + | + | + | + | + | + |               |               | $\beta$ -arrestin protein. shares similarity with <i>Aspergillus idulans</i> CreD. possible inhibitor of G-p |
| 81700 | + | + | + | + | + | + | 1.144<br>down | 2.691<br>down | mannose-6-phosphate isomerase                                                                                |
| 81713 | + | + | + | + | + | + |               |               | ribosomal protein S24e. Homologue of yeast RPS24a/b.                                                         |
| 81716 | + | + | + | + | + | + |               |               | peptidyl-prolyl cis-trans isomerase                                                                          |
| 81720 |   |   |   |   |   |   | 1.222<br>down | 2.629<br>down | Ume5 gen                                                                                                     |
| 81730 | + | + | + | + | + | + | 1.224 up      | 2.100 up      | glutaredoxin                                                                                                 |
| 81742 | + | + | + | + | + | + |               |               | RNA polymerase I subunit Rpa43. putative                                                                     |
| 81756 |   |   |   |   |   |   |               |               | unknown protein                                                                                              |
| 81757 | + | + | + | + | + | + |               |               | unknown protein                                                                                              |
| 81763 | + | + | + | + | + | + |               |               | unknown protein                                                                                              |
| 81774 | + | + | + | + | + | + | 1.141<br>down | 2.798<br>down | unknown protein                                                                                              |
| 81778 |   |   |   |   |   |   |               |               | glutaminase A                                                                                                |
| 81779 | + | + | + | + | + | + |               |               | ribosomal protein MRPL20.                                                                                    |
| 81783 | + | + | + | + | + | + |               |               | unknown protein                                                                                              |
| 81785 | + | + | + | + | + | + |               |               | GTPase activating factor (RasGAP) related to <i>S. cerevisiae</i> Bud2                                       |
| 81797 | + | + | + | + | + | + |               |               | Sec1 family member sly1                                                                                      |
| 81803 | + | + | + | + | + | + |               |               | mitochondrial protein sorting (Msf1)                                                                         |
| 81804 | + | + | + | + | + | + |               |               | methionine aminopeptidase                                                                                    |
| 81819 |   |   |   |   |   |   |               |               | unknown protein                                                                                              |
| 81822 | + | + | + | + | + | + |               |               | mitochondrial leucyl-tRNA synthetase.                                                                        |
| 81824 | + | + | + | + | + | + |               |               | MTHFRMethylenetetrahydrofolate reductase                                                                     |
| 81843 |   | + |   |   |   |   | 2.746<br>down | 9.875<br>down | Alkaline phosphatase                                                                                         |
| 81855 | + | + | + | + | + | + |               |               | pyruvate dehydrogenase kinase. putative                                                                      |

|       |   |   |   |  |  |  |  |  |  |  |  |  |  |  |  |  |  |                                                      |
|-------|---|---|---|--|--|--|--|--|--|--|--|--|--|--|--|--|--|------------------------------------------------------|
| 81859 |   |   |   |  |  |  |  |  |  |  |  |  |  |  |  |  |  | Ubiquitin-specific protease                          |
| 81861 |   |   |   |  |  |  |  |  |  |  |  |  |  |  |  |  |  | protein kinase BUR1                                  |
| 81865 |   |   |   |  |  |  |  |  |  |  |  |  |  |  |  |  |  | unknown protein                                      |
| 81882 |   |   |   |  |  |  |  |  |  |  |  |  |  |  |  |  |  | unknown protein                                      |
| 81884 |   |   |   |  |  |  |  |  |  |  |  |  |  |  |  |  |  | Translocon-associated protein (TRAP). alpha subunit  |
| 81889 |   |   |   |  |  |  |  |  |  |  |  |  |  |  |  |  |  | unknown protein                                      |
| 81896 |   |   |   |  |  |  |  |  |  |  |  |  |  |  |  |  |  | aspartate kinase                                     |
| 81906 |   |   |   |  |  |  |  |  |  |  |  |  |  |  |  |  |  | unknown protein                                      |
|       |   |   |   |  |  |  |  |  |  |  |  |  |  |  |  |  |  |                                                      |
| 81911 |   |   |   |  |  |  |  |  |  |  |  |  |  |  |  |  |  | unknown protein                                      |
| 81920 |   |   |   |  |  |  |  |  |  |  |  |  |  |  |  |  |  | SSCRP                                                |
| 81925 |   |   |   |  |  |  |  |  |  |  |  |  |  |  |  |  |  | unknown protein                                      |
| 81930 |   |   |   |  |  |  |  |  |  |  |  |  |  |  |  |  |  | HAM1-like protein. probably related to DNA-repair    |
| 81939 |   |   |   |  |  |  |  |  |  |  |  |  |  |  |  |  |  | unknown protein                                      |
| 81949 | + | + | + |  |  |  |  |  |  |  |  |  |  |  |  |  |  | Winged helix repressor DNA-binding                   |
| 81955 |   |   |   |  |  |  |  |  |  |  |  |  |  |  |  |  |  | nitrate reductase                                    |
| 81964 |   |   |   |  |  |  |  |  |  |  |  |  |  |  |  |  |  | PKS                                                  |
| 81972 |   |   |   |  |  |  |  |  |  |  |  |  |  |  |  |  |  | phosphatidylinositol transporter. putative           |
|       |   |   |   |  |  |  |  |  |  |  |  |  |  |  |  |  |  |                                                      |
| 81979 |   |   |   |  |  |  |  |  |  |  |  |  |  |  |  |  |  | glutathione-S-transferase                            |
| 81984 |   |   |   |  |  |  |  |  |  |  |  |  |  |  |  |  |  | palmitoyl protein thioesterase                       |
| 81990 |   |   |   |  |  |  |  |  |  |  |  |  |  |  |  |  |  | unknown protein                                      |
| 82001 |   |   |   |  |  |  |  |  |  |  |  |  |  |  |  |  |  | unknown protein                                      |
| 82014 |   |   |   |  |  |  |  |  |  |  |  |  |  |  |  |  |  | Aa_transTransmembrane amino acid transporter protein |
| 82017 |   |   |   |  |  |  |  |  |  |  |  |  |  |  |  |  |  | siderophore transporter                              |
| 82026 |   |   |   |  |  |  |  |  |  |  |  |  |  |  |  |  |  | trans-aconitate methyltransferase                    |
| 82032 |   |   |   |  |  |  |  |  |  |  |  |  |  |  |  |  |  | unknown protein                                      |
|       |   |   |   |  |  |  |  |  |  |  |  |  |  |  |  |  |  |                                                      |
| 82037 |   |   |   |  |  |  |  |  |  |  |  |  |  |  |  |  |  | Inorganic phosphate transporter                      |
| 82039 |   |   |   |  |  |  |  |  |  |  |  |  |  |  |  |  |  | D-aminoacylase. putative                             |

|       |   |   |   |   |   |   |   |   |            |            |                                                                 |
|-------|---|---|---|---|---|---|---|---|------------|------------|-----------------------------------------------------------------|
| 82041 |   |   |   |   |   |   |   |   |            | PTH11 GPCR |                                                                 |
| 82049 |   |   |   |   |   |   |   |   | 1.577 up   | 7.546 up   | unknown protein                                                 |
| 82068 |   |   |   |   |   |   |   |   |            |            | unknown protein                                                 |
| 82074 |   |   |   |   |   |   |   |   |            |            | unknown protein                                                 |
| 82085 |   |   | + | + | + | + | + | + |            |            | glutaredoxin Grx1. putative                                     |
| 82087 |   |   | + | + | + | + | + | + |            |            | unknown protein                                                 |
| 82095 |   |   |   |   |   |   |   |   | 1.055 up   | 2.518 up   | ammonium transporter. high affinity                             |
| 82100 |   |   | + | + | + | + | + | + |            |            | PhosphatidylinositolPolyphosphatePhosphatase                    |
| 82105 |   |   | + |   |   |   |   |   | 2.755 down | 4.288 down | PDR-type ABC transporters                                       |
| 82123 |   |   | + | + | + | + | + | + |            |            | unknown protein                                                 |
| 82125 |   |   | + | + | + | + | + | + |            |            | mediator of RNA polymerase II transcription subunit 7. putative |
| 82133 |   |   | + | + | + | + | + | + |            |            | cytochrome P450. putative                                       |
| 82137 |   |   |   |   |   |   |   |   |            |            | unknown protein                                                 |
| 82141 |   |   |   |   | + |   |   |   |            |            | serine carboxypeptidase S28. putative                           |
| 82145 | + | + |   |   | + | + | + | + |            |            | GDP-fucose transporter (putative)                               |
| 82146 |   |   |   |   | + |   |   |   |            |            | unknown protein                                                 |
| 82150 |   |   | + | + | + | + | + | + |            |            | phosphate transporter (Pho88). putative                         |
| 82153 |   |   | + | + | + | + | + | + |            |            | unknown protein                                                 |
| 82172 |   |   |   |   |   |   |   |   |            |            | lipoate-protein ligase A. putative                              |
| 82175 |   |   | + | + | + | + | + | + |            |            | serine/threonine protein kinase                                 |
| 82177 |   |   |   |   |   |   |   |   |            |            | 3-oxo-5-alpha-steroid 4-dehydrogenase                           |
| 82197 |   |   | + | + | + | + | + | + |            |            | CN_hydrolaseCarbon-nitrogen hydrolase                           |
| 82204 |   |   |   |   | + |   |   |   | 1.113 down | 2.439 down | ammonium transporter. high affinity                             |
| 82208 |   |   |   |   |   |   |   |   |            |            | PKS                                                             |
| 82214 |   |   |   |   |   |   |   |   |            |            | unknown protein                                                 |
| 82227 |   |   |   |   |   |   |   |   |            |            | GH3 $\beta$ -glucosidase CEL3c                                  |
| 82235 |   |   | + | + | + |   |   |   | 1.174 up   | 2.844 up   | GH31 $\alpha$ -glucosidase                                      |
| 82241 |   |   |   |   |   |   |   |   |            |            | Zn2Cys6 transcriptional regulator                               |

|       |   |   |   |   |   |   |              |            |                                                                                 |
|-------|---|---|---|---|---|---|--------------|------------|---------------------------------------------------------------------------------|
| 82246 |   |   |   |   |   |   | 1.358 up     | 2.245 up   | GCPR. mPR-type                                                                  |
| 82260 | + | + | + | + | + | + |              |            | unknown protein                                                                 |
| 82280 | + | + | + | + | + | + |              |            | mitochondrial 2-oxoglutarate/2-oxoadipate transporter-like protein              |
| 82286 | + | + | + | + | + | + | 1.478 up     | 2.044 up   | unknown protein                                                                 |
| 82296 |   |   |   |   |   |   |              |            | MFS permease                                                                    |
| 82309 |   |   |   |   |   |   | 1.390 down   | 5.190 down | MFS permease                                                                    |
| 82317 |   |   |   |   |   |   |              |            | Unknown protein                                                                 |
| 82321 |   |   |   |   |   |   | 122.123 down | 2.981 down | Aquaporin                                                                       |
| 82326 | + | + | + | + | + | + |              |            | phosphoglycerate mutase family protein                                          |
| 82327 |   |   |   |   |   |   | 4.846 down   | 5.701 down | PDR-type ABC transporters                                                       |
| 82334 | + | + | + | + | + | + |              |            | tyrosyl-tRNA synthetase. class Ib.                                              |
| 82351 | + | + | + | + | + | + |              |            | MAPK2. mitogen activated protein kinase 2. probably involved in stress response |
| 82356 | + | + | + | + | + | + |              |            | unknown protein                                                                 |
| 82360 | + | + | + | + | + | + |              |            | lipase/serine esterase. putative                                                |
| 82374 | + | + | + | + | + | + | 2.028 down   | 4.120 down | unknown protein                                                                 |
| 82380 | + | + | + | + | + | + |              |            | initiation factor 2B.                                                           |
| 82385 | + | + | + | + | + | + |              |            | methionyl-tRNA synthetase.                                                      |
| 82403 | + | + | + | + | + | + | 1.198 down   | 3.822 down | Acyl-CoA dehydrogenase                                                          |
| 82409 | + | + | + | + | + | + |              |            | Amidohydrolase                                                                  |
| 82425 | + | + | + | + | + | + | 1.070 up     | 2.685 up   | unknown protein                                                                 |
| 82434 | + | + | + | + | + | + |              |            | Unknown protein with TPR structural motif.                                      |
| 82442 |   | + |   |   |   |   |              |            | Several tryptophanyl-tRNA synthetases from other fungi.                         |
| 82451 | + | + | + | + | + | + |              |            | 1.2-dihydroxy-3-keto-5-methylthiopentene dioxxygenase . putative                |
| 82452 | + | + | + | + | + | + |              |            | Aminopeptidase P                                                                |
| 82458 | + | + | + | + | + | + |              |            | Peptidase C19. ubiquitin carboxyl-terminal hydrolase 2                          |
| 82469 | + |   |   |   |   |   |              |            | unknown protein                                                                 |

|       |   |   |   |   |   |   |               |               |                                                                                            |
|-------|---|---|---|---|---|---|---------------|---------------|--------------------------------------------------------------------------------------------|
| 82475 | + | + | + | + | + | + |               |               | Ras GTPase-activating protein with distant similarity to human neurofibromin. possibly inv |
| 82476 | + | + | + | + | + | + |               |               | Exocyst component Sec15                                                                    |
| 82499 | + | + | + | + | + | + |               |               | Integral membrane protein. putative                                                        |
| 82510 | + | + | + | + | + | + |               |               | histone H4 variant                                                                         |
| 82512 | + | + | + | + | + | + |               |               | 26S proteasome regulatory complex subunit Rpn4                                             |
| 82516 | + | + | + | + | + | + |               |               | Pentafunctional Aromatic Polypeptide                                                       |
| 82519 | + | + | + | + | + | + |               |               | unknown protein                                                                            |
| 82523 | + | + | + | + | + |   | 1.146<br>down | 2.139<br>down | unknown protein                                                                            |
| 82529 | + | + | + | + | + | + |               |               | membrane-bound O-acyltransferase domain-containing protein                                 |
| 82531 | + | + | + | + | + | + |               |               | GTPase-activating protein gyp10. putative                                                  |
| 82534 | + | + | + | + | + | + |               |               | heat shock protein (Hsp70 chaperone Hsp88)                                                 |
| 82539 | + | + | + | + | + | + |               |               | nonsense-mediated mRNA decay factor (Upf2). putative                                       |
| 82544 | + | + | + |   |   |   |               |               | Calcium transporter                                                                        |
| 82547 | + | + | + | + | + | + |               |               | cystathionine beta-lyase                                                                   |
| 82551 | + | + | + | + | + | + |               |               | GT $\alpha$ -1.6-mannosyltransferase                                                       |
| 82560 | + | + | + | + | + | + | 2.091 up      | 2.857 up      | Ribokinase                                                                                 |
| 82562 | + | + | + | + | + | + |               |               | unknown protein                                                                            |
| 82568 | + | + | + | + | + | + |               |               | AAA ATPase                                                                                 |
| 82577 | + | + | + | + | + | + |               |               | ArgE. Acetylornithine deacetylase/Succinyl-diaminopimelate desuccinylase and related de    |
| 82591 | + | + | + | + | + | + | 3.120<br>down | 3.377<br>down | unknown protein with oxidoreductase domain                                                 |
| 82599 | + | + | + | + |   | + |               |               | unknown protein                                                                            |
| 82601 | + | + | + | + | + | + |               |               | AldedhAldehyde dehydrogenase family                                                        |
| 82606 | + | + | + | + | + | + | 1.068 up      | 2.174 up      | Mn2+ homeostasis protein Per1                                                              |
| 82613 | + | + | + | + | + | + |               |               | translation elongation factor 1 beta by homology to the corresponding gene in other fung   |
| 82616 | + |   | + |   |   |   | 5.179<br>down | 4.507<br>down | GH5 membrane bound endoglucanase CEL5b                                                     |
| 82619 |   |   |   |   |   |   | 1.131 up      | 9.196<br>down | arginosuccinate synthetase                                                                 |
| 82623 |   |   |   |   |   |   |               |               | tripeptide peptidase                                                                       |

|        |   |   |   |   |   |   |             |            |                                                  |
|--------|---|---|---|---|---|---|-------------|------------|--------------------------------------------------|
| 82626  |   |   |   |   |   |   | 1.093 up    | 3.230 down | half-sized ABC transporter                       |
| 82628  |   |   |   |   |   |   | 4.132 up    | 2.764 up   | acetyltransferase SidF                           |
| 82633  |   |   | + |   |   |   | 3.948 down  | 4.784 down | GH72 $\beta$ -1 3-glucanosyltransferase          |
| 82651  | + | + | + | + | + | + |             |            | Cullin                                           |
| 82662  |   |   |   |   |   |   | 75.475 down | 4.705 down | Epl1/Sm1                                         |
| 82667  | + | + | + | + | + | + |             |            | ThrB Homoserine kinase                           |
| 82668  | + | + | + | + | + | + |             |            | nuclear pore complex protein sonA                |
| 102377 | + | + | + | + | + | + |             |            | unknown protein                                  |
| 102378 | + | + | + | + | + | + |             |            | kinesin-like protein. a kinesin-3 family member. |
| 102379 |   | + |   |   |   |   |             |            | unknown protein                                  |
| 102381 | + | + | + | + | + | + |             |            | Calcium-binding EF-hand                          |
| 102382 |   |   |   |   |   |   |             |            | hydroxyacylglutathione hydrolase                 |
| 102383 |   |   |   |   |   |   | 1.548 down  | 4.029 down | unknown protein                                  |
| 102385 |   |   |   |   |   |   | 1.011 down  | 2.671 up   | unknown protein                                  |
| 102386 |   |   |   |   |   |   | 1.618 up    | 2.391 up   | unique protein                                   |
| 102401 | + | + | + | + | + | + |             |            | DNA polymeraseDelta. small regulatory subunit    |
| 102403 |   |   |   |   |   |   |             |            | unknown protein                                  |
| 102411 |   |   |   |   |   |   | 1.522 down  | 2.640 down | unknown protein                                  |
| 102414 | + | + | + |   |   |   |             |            | unknown protein                                  |
| 102416 |   |   |   |   |   |   | 2.132 down  | 2.163 down | amino acid permease PotE                         |
| 102437 |   |   |   |   |   |   |             |            | unique protein. secreted                         |
| 102441 |   | + |   |   |   |   |             |            | unknown protein                                  |
| 102444 | + | + | + | + | + | + |             |            | unknown protein                                  |
| 102451 | + | + | + | + | + | + |             |            | unknown protein                                  |



|        |   |   |   |  |  |  |  |  |            |          |                                                                     |
|--------|---|---|---|--|--|--|--|--|------------|----------|---------------------------------------------------------------------|
| 102454 |   |   |   |  |  |  |  |  | 1.741 up   | 2.160 up | unknown protein                                                     |
| 102458 |   |   |   |  |  |  |  |  |            |          | QDE3. RecQ helicase. essential for quelling                         |
| 102461 |   |   |   |  |  |  |  |  |            |          | unknown protein                                                     |
| 102464 |   |   |   |  |  |  |  |  |            |          | bHLH transcriptional regulator                                      |
| 102467 |   |   |   |  |  |  |  |  | 1.499 down | 3.218 up | unknown protein                                                     |
| 102468 |   |   |   |  |  |  |  |  |            |          | unknown protein                                                     |
| 102476 |   |   |   |  |  |  |  |  |            |          | unknown protein                                                     |
| 102482 |   |   |   |  |  |  |  |  |            |          | unknown protein                                                     |
| 102487 |   |   |   |  |  |  |  |  |            |          | Cytochrome P450 CYP2 subfamily                                      |
| 102489 |   |   |   |  |  |  |  |  |            |          | unknown protein                                                     |
| 102492 |   |   |   |  |  |  |  |  |            |          | Short-chain dehydrogenase/reductase                                 |
| 102497 |   |   |   |  |  |  |  |  |            |          | Zn2Cys6 transcriptional regulator                                   |
| 102499 |   |   |   |  |  |  |  |  | 1.036 down | 6.618 up | Zn2Cys6 transcriptional regulator                                   |
| 102500 |   |   |   |  |  |  |  |  | 1.148 down | 3.845 up | MRSP1/expansin-like                                                 |
| 102504 |   |   |   |  |  |  |  |  |            |          | unknown protein                                                     |
| 102512 |   |   |   |  |  |  |  |  |            |          | unknown protein                                                     |
| 102521 |   |   |   |  |  |  |  |  |            |          | unknown protein                                                     |
| 102554 |   |   |   |  |  |  |  |  |            |          | small nuclear ribonucleoprotein Lsm8                                |
| 102555 |   |   |   |  |  |  |  |  |            |          | inosine-uridine preferring nucleoside hydrolase                     |
| 102559 |   |   |   |  |  |  |  |  |            |          | integral membrane protein                                           |
| 102561 |   |   |   |  |  |  |  |  |            |          | FAD binding domain-containing protein                               |
| 102562 |   |   |   |  |  |  |  |  |            |          | unknown protein. Duf899 domain                                      |
| 102567 | + | + | + |  |  |  |  |  | 1.516 up   | 3.056 up | unknown protein                                                     |
| 102572 |   |   |   |  |  |  |  |  |            |          | Peptidyl-prolyl cis-trans isomerase PIN4 (EC 5.2.1.8) (PPIase PIN4) |
| 102579 |   |   |   |  |  |  |  |  |            |          | E3 ubiquitin-protein ligase BRE1 (EC 6.3.2.-) [BRE1]                |
| 102581 |   |   |   |  |  |  |  |  |            |          | Ubiquitin binding protein Rad23                                     |
| 102582 |   |   |   |  |  |  |  |  |            |          | unknown protein                                                     |

|        |   |   |   |   |   |   |            |          |                                                                                              |
|--------|---|---|---|---|---|---|------------|----------|----------------------------------------------------------------------------------------------|
| 102593 | + | + | + | + | + | + | 1.550 up   | 2.534 up | Mitochondrial ribosomal protein L17                                                          |
| 102599 |   | + |   |   |   |   |            |          | unknown protein                                                                              |
| 102603 | + | + | + | + | + | + |            |          | Pre-mRNA-splicing factor ini1                                                                |
| 102607 | + | + | + | + | + | + |            |          | unknown protein                                                                              |
| 102612 | + | + | + | + | + | + |            |          | inositol-pentakisphosphate 2-kinase                                                          |
| 102616 | + | + | + | + | + | + |            |          | transcriptional corepressor Cyc8                                                             |
| 102617 | + | + | + | + | + | + |            |          | unknown protein                                                                              |
| 102619 |   |   |   |   |   |   |            |          | unknown protein                                                                              |
| 102627 | + | + | + | + | + | + |            |          | unknown protein                                                                              |
| 102637 |   |   |   |   |   |   | 1.847 up   | 3.624 up | unique protein                                                                               |
| 102640 | + | + | + | + | + | + |            |          | unknown protein                                                                              |
| 102641 | + | + | + | + | + | + |            |          | unknown protein                                                                              |
| 102648 | + | + | + | + | + | + |            |          | unknown protein                                                                              |
| 102650 | + | + | + | + | + | + |            |          | unknown protein                                                                              |
| 102652 | + | + | + | + | + | + |            |          | unknown protein                                                                              |
| 102655 | + | + | + | + | + | + |            |          | cAMP phosphodiesterase PDE2. high affinity                                                   |
| 102659 | + | + | + | + | + | + |            |          | GTPase with a role in regulation of membrane traffic. arl1; G protein of the Ras superfamily |
| 102668 | + | + | + | + | + | + |            |          | unknown protein                                                                              |
| 102672 | + | + | + | + | + | + |            |          | unknown protein                                                                              |
| 102673 | + | + | + |   | + |   |            |          | unknown zinc finger protein                                                                  |
| 102676 |   |   |   |   |   |   |            |          | DNA-directed RNA polymerase. 13 to 16 kDa subunit                                            |
| 102677 |   |   |   |   |   |   |            |          | unknown protein                                                                              |
| 102680 |   |   |   |   |   |   | 1.058 down | 2.377 up | unique protein                                                                               |
| 102686 |   |   |   |   |   |   |            |          | SSCRP                                                                                        |
| 102694 | + | + | + | + | + | + |            |          | Cohesin (Denison. Kafer et al. 1993)                                                         |
| 102700 | + | + | + | + | + | + |            |          | glycyl-tRNA synthase. alpha 2 dimer.                                                         |
| 102705 | + | + | + | + | + | + |            |          | unknown protein                                                                              |
| 102711 | + | + | + | + | + | + |            |          | serine/threonine-protein kinase. putative                                                    |
| 102723 |   |   |   |   |   |   |            |          | TBC domain protein (GAP)                                                                     |

|        |   |   |   |   |   |   |               |               |                                                            |
|--------|---|---|---|---|---|---|---------------|---------------|------------------------------------------------------------|
| 102735 |   | + |   |   |   |   |               |               | unknown protein. WSC domain                                |
| 102737 | + | + | + |   |   |   |               |               | VosA ?                                                     |
| 102738 | + | + | + |   | + |   | 4.027<br>down | 2.121<br>down | unknown protein                                            |
| 102743 | + | + | + |   | + |   |               |               | unknown protein. only in Sordariomycetes                   |
| 102744 | + | + | + | + | + | + |               |               | TrpE Anthranilate/para-aminobenzoate synthases component I |
| 102763 |   | + | + |   |   |   |               |               | unknown protein                                            |
| 102766 |   |   |   |   |   |   |               |               | short chain dehydrogenase/reductase                        |
| 102769 | + | + | + | + | + | + |               |               | unknown protein                                            |
| 102772 |   |   |   |   |   |   |               |               | unknown protein                                            |
| 102773 |   |   |   |   |   |   | 1.674 up      | 6.196 up      | unknown protein                                            |
| 102774 |   |   |   |   |   |   | 1.389 up      | 5.248 up      | unknown protein                                            |
| 102775 |   |   |   |   |   |   |               |               | unknown protein                                            |
| 102776 |   | + | + |   | + |   |               |               | unknown protein                                            |
| 102778 |   |   |   |   |   |   |               |               | unknown protein                                            |
| 102779 |   |   |   |   |   |   | 2.439 up      | 2.160 up      | unknown protein                                            |
| 102780 |   |   |   |   |   |   | 1.340 up      | 4.147 up      | unknown protein                                            |
| 102785 |   |   |   |   |   |   |               |               | unknown protein                                            |
| 102787 |   |   |   |   |   |   | 1.879 up      | 2.600 up      | unique protein                                             |
| 102788 |   |   |   |   |   |   | 1.186 up      | 3.375 up      | unique protein                                             |
| 102789 |   |   |   |   |   |   |               |               | unique protein                                             |
| 102794 | + | + | + | + |   | + |               |               | RNA recognition domain protein                             |
| 102799 |   |   |   |   |   |   |               |               | unknown protein                                            |
| 102813 | + | + | + | + | + | + |               |               | dynactin ro-3                                              |
| 102816 | + | + | + | + | + | + | 1.513<br>down | 2.344<br>down | Zn2Cys6 transcriptional regulator                          |
| 102820 |   |   |   |   |   |   |               |               | ferrooxidoreductase                                        |
| 102830 | + | + | + |   | + |   | 4.386<br>down | 2.858<br>down | unknown protein                                            |
| 102836 |   |   |   |   |   |   |               |               | unknown protein                                            |

|        |  |   |   |   |   |   |               |               |  |                                                              |
|--------|--|---|---|---|---|---|---------------|---------------|--|--------------------------------------------------------------|
| 102837 |  |   |   |   |   |   |               |               |  | unknown protein with CFEM domain                             |
| 102846 |  |   |   |   |   |   | 1.230<br>down | 2.239<br>down |  | unknown protein                                              |
| 102850 |  |   |   |   |   |   | 1.029 up      | 2.222<br>down |  | unique protein                                               |
| 102851 |  |   |   |   |   |   | 4.207 up      | 9.908 up      |  | SSCRP                                                        |
| 102855 |  |   |   |   |   |   |               |               |  | SAM methyltransferase TRM9 (tRNA carboxymethyl transferase). |
| 102863 |  |   |   |   |   |   | 1.103<br>down | 2.858<br>down |  | unknown protein                                              |
| 102864 |  |   |   |   |   |   |               |               |  | unknown protein                                              |
| 102870 |  | + | + | + | + | + |               |               |  | unknown protein                                              |
| 102871 |  |   | + |   |   |   |               |               |  | unique protein                                               |
| 102876 |  |   |   |   |   |   | 1.040 up      | 2.045<br>down |  | unique protein                                               |
| 102884 |  |   |   |   |   |   |               |               |  | unique protein                                               |
| 102887 |  | + | + | + |   |   | 1.447 up      | 3.225 up      |  | unique protein                                               |
| 102890 |  |   |   |   |   |   |               |               |  | unknown protein                                              |
| 102892 |  | + | + | + | + | + | 1.165<br>down | 2.607<br>down |  | unknown protein                                              |
| 102901 |  | + | + | + | + | + |               |               |  | unknown protein                                              |
| 102904 |  |   |   | + |   |   |               |               |  | unknown protein                                              |
| 102906 |  |   |   |   |   |   | 2.927<br>down | 4.337<br>down |  | unique protein                                               |
| 102908 |  | + | + | + |   |   |               |               |  | SSCRP                                                        |
| 102909 |  |   |   |   |   |   |               |               |  | GH2 protein                                                  |
| 102910 |  | + | + | + | + | + |               |               |  | unknown protein                                              |
| 102920 |  | + | + | + | + |   | 4.625<br>down | 6.239<br>down |  | C2H2 transcriptional regulator                               |
| 102927 |  |   |   |   |   |   | 1.412 up      | 2.592 up      |  | Serine/threonine protein kinase                              |
| 102933 |  |   |   |   |   |   | 1.831 up      | 3.914<br>down |  | unknown protein. only in Gibberella                          |
| 102935 |  |   |   |   |   |   | 1.124 up      | 2.963 up      |  | unknown protein                                              |

|        |   |  |   |   |   |   |   |   |            |             |                                                                      |
|--------|---|--|---|---|---|---|---|---|------------|-------------|----------------------------------------------------------------------|
| 102936 |   |  |   |   |   |   |   |   | 1.234 up   | 3.549 up    | unknown protein                                                      |
| 102938 |   |  |   |   |   |   |   |   |            |             | SSCRP                                                                |
| 102941 |   |  | + | + | + | + | + | + |            |             | unknown protein                                                      |
| 102947 |   |  |   |   |   |   |   |   |            |             | unknown protein                                                      |
| 102952 |   |  |   |   |   |   |   |   |            |             | unknown protein                                                      |
| 102953 |   |  |   |   |   |   |   |   | 3.052 down | 4.708 down  | dityrosine transporter. required for spore wall synthesis            |
| 102957 |   |  |   |   |   |   |   |   |            |             | 2-oxoglutarate-dependent ethylene/succinate-forming enzyme. putative |
| 102960 |   |  | + | + | + | + | + |   | 1.842 up   | 2.297 up    | unique protein. 2 TM                                                 |
| 102964 |   |  | + | + | + |   |   | + |            |             | ribosomal protein S2.                                                |
| 102966 |   |  |   |   |   | + |   |   |            |             | unknown protein                                                      |
| 102970 | + |  | + |   |   |   |   |   |            |             | unique protein                                                       |
| 102973 |   |  | + | + | + | + | + | + |            |             | unknown protein                                                      |
| 102976 |   |  | + | + | + | + | + | + | 1.588 up   | 2.411 up    | unknown protein                                                      |
| 102980 |   |  | + | + | + | + | + | + |            |             | ubiquitin-conjugating enzyme. putative                               |
| 102985 |   |  | + | + | + | + | + | + | 1.861 down | 3.234 down  | unknown protein                                                      |
| 102989 |   |  |   |   |   |   |   |   |            |             | unknown protein                                                      |
| 102996 |   |  |   |   |   |   |   |   |            |             | unknown protein                                                      |
| 102998 |   |  |   |   |   |   |   |   |            |             | ADP-ribosylglycohydrolase-like protein                               |
| 102999 |   |  |   |   |   |   |   |   | 6.126 up   | 11.491 up   | unknown protein                                                      |
| 103002 |   |  |   |   |   | + |   |   |            |             | unique protein                                                       |
| 103006 |   |  |   |   |   |   |   |   |            |             | unknown protein. only in Hypocreaceae                                |
| 103009 |   |  |   |   |   |   |   |   |            |             | unknown protein                                                      |
| 103012 |   |  |   |   |   |   |   |   |            |             | taurine catabolism dioxygenase. alpha-ketoglutarate dependent        |
| 103015 |   |  |   |   |   |   |   |   | 8.856 down | 10.365 down | unknown protein                                                      |
| 103016 |   |  |   |   |   |   |   |   | 1.057 down | 2.695 up    | unique protein                                                       |
| 103023 |   |  |   |   |   |   |   |   |            |             | unknown protein                                                      |
| 103028 |   |  | + | + | + | + | + | + |            |             | unique protein                                                       |

|        |   |   |   |            |            |                                          |
|--------|---|---|---|------------|------------|------------------------------------------|
| 103031 |   |   |   |            |            | unknown protein                          |
| 103032 |   |   |   | 1.208 up   | 3.405 up   | unknown protein                          |
| 103033 |   |   |   |            |            | PL7 alignate lyase                       |
| 103034 |   |   |   | 3.507 down | 9.746 down | Zn2Cys6 transcriptional regulator        |
| 103039 |   |   |   |            |            | peptidase S41                            |
| 103041 |   |   |   | 4.814 down | 6.212 up   | acetamidase                              |
| 103043 | + | + | + | 1.105 up   | 3.003 up   | unknown protein                          |
| 103044 | + | + | + | 1.148 up   | 2.795 up   | unique protein                           |
| 103045 | + | + | + |            |            |                                          |
| 103048 |   |   |   |            |            | unique protein                           |
| 103049 |   |   |   | 2.382 down | 2.468 up   | GH28 endo-polygalacturonase              |
| 103050 |   |   |   |            |            | unknown protein                          |
| 103059 |   |   |   | 2.053 down | 2.031 up   | unknown protein                          |
| 103060 |   |   |   |            |            | unknown protein                          |
| 103061 |   |   |   | 1.298 up   | 4.189 up   | unknown protein                          |
| 103062 |   |   |   |            |            | unique protein                           |
| 103063 |   |   |   | 1.738 down | 3.827 up   | unknown protein                          |
| 103064 |   |   |   | 6.552 down | 2.463 up   | unknown protein                          |
| 103065 |   |   |   | 1.378 up   | 3.061 up   | unknown protein                          |
| 103073 |   |   | + | 1.205 up   | 2.041 up   | unknown protein                          |
| 103080 |   |   |   |            |            | unknown protein                          |
| 103103 |   |   |   |            |            | GCN5-N-Acetyltransferase                 |
| 103108 |   |   |   |            |            | phytanoyl-CoA dioxygenase family protein |
| 103112 |   |   |   | 2.549 up   | 4.117 up   | unknown protein                          |
| 103113 |   |   |   |            |            | short chain dehydrognease/reductase      |

|        |  |   |   |   |   |   |             |            |                                                                |
|--------|--|---|---|---|---|---|-------------|------------|----------------------------------------------------------------|
| 103114 |  |   |   |   |   |   | 1.079 up    | 3.106 up   | unknown protein                                                |
| 103119 |  |   |   |   |   |   | 1.115 up    | 4.041 up   | membrane dipeptidase GliJ                                      |
| 103121 |  |   |   |   |   |   | 1.200 up    | 4.041 up   | unique protein                                                 |
| 103122 |  |   |   |   |   |   | 1.000 down  | 3.653 up   | Zn2Cys6 transcriptional regulator                              |
| 103127 |  |   |   |   |   |   |             |            | unknown protein                                                |
| 103129 |  |   |   |   |   |   | 1.111 up    | 2.343 up   | unknown protein                                                |
| 103130 |  |   |   |   |   |   | 1.315 up    | 2.650 up   | unique protein                                                 |
| 103131 |  |   |   |   |   |   |             |            | unknown protein. 1 TM                                          |
| 103132 |  | + | + | + | + | + |             |            | acetylglutamate kinase ARG6                                    |
| 103133 |  |   |   |   |   |   |             |            | unknown protein                                                |
| 103134 |  |   |   |   |   |   |             |            | unknown protein only present with low similarity in Neurospora |
| 103135 |  |   |   |   |   |   | 1.070 up    | 16.190 up  | SSCRP                                                          |
| 103136 |  |   |   |   |   |   | 1.614 up    | 2.455 up   | Glycolate oxidase                                              |
| 103138 |  |   |   |   |   |   | 1.029 down  | 2.460 down | Zn2Cys6 transcriptional regulator                              |
| 103143 |  |   |   |   |   |   |             |            | unknown protein                                                |
| 103145 |  |   |   |   |   |   | 3.357 down  | 3.491 down | unique protein                                                 |
| 103147 |  | + | + | + | + | + | 1.749 down  | 5.977 down | unknown protein                                                |
| 103149 |  |   |   |   |   |   | 18.085 down | 6.549 down | AAA ATPase                                                     |
| 103153 |  |   |   |   |   |   |             |            | unique protein                                                 |
| 103155 |  |   |   |   |   |   | 1.153 up    | 3.630 up   | unknown protein                                                |
| 103156 |  |   |   |   |   |   | 19.725 down | 3.204 down | unknown protein                                                |
| 103157 |  |   |   |   |   |   | 1.024 up    | 4.853 down | unknown protein                                                |
| 103158 |  |   |   |   |   |   | 2.610 down  | 7.664 down | Zn2Cys6 transcriptional regulator                              |
| 103162 |  |   |   |   |   |   |             |            | Dihydrolipoamide acetyltransferase                             |

|        |   |   |   |   |   |   |   |   |   |          |          |                                                                                                 |
|--------|---|---|---|---|---|---|---|---|---|----------|----------|-------------------------------------------------------------------------------------------------|
| 103167 |   |   |   | + | + | + | + | + | + |          |          | unknown protein                                                                                 |
|        |   |   |   |   |   |   |   |   |   | 5.905    | 2.021    |                                                                                                 |
| 103172 |   |   |   |   |   |   |   |   |   | down     | down     | unique protein                                                                                  |
| 103174 |   |   |   |   |   |   |   |   |   | 1.007 up | 4.014 up | SSCRP                                                                                           |
| 103175 |   |   |   |   |   |   |   |   |   | 1.476 up | 3.592 up | epoxide hydrolase. putative                                                                     |
| 103176 |   |   |   |   |   |   |   |   |   | 1.004 up | 2.534 up | unknown protein                                                                                 |
| 103177 |   |   |   |   |   |   |   |   |   | 2.072 up | 2.395 up | glutathionine S-transferase                                                                     |
| 103179 | + |   |   |   |   |   |   |   |   |          |          | MFS permease                                                                                    |
| 103180 |   |   |   |   | + |   |   |   |   |          |          | unknown protein                                                                                 |
|        |   |   |   |   |   |   |   |   |   | 1.367    |          |                                                                                                 |
| 103186 |   |   |   |   |   |   |   |   |   | down     | 2.113 up | unknown protein                                                                                 |
|        |   |   |   |   |   |   |   |   |   | 3.073    | 2.586    |                                                                                                 |
| 103189 |   |   |   |   |   |   |   |   |   | down     | down     | HET protein                                                                                     |
| 103191 | + | + | + |   |   |   |   |   |   |          |          | unknown protein                                                                                 |
|        |   |   |   |   |   |   |   |   |   | 10.151   | 7.186    |                                                                                                 |
| 103193 |   |   |   |   |   |   |   |   |   | down     | down     | ankyrin                                                                                         |
| 103205 |   |   |   |   |   |   |   |   |   | 5.009 up | 4.748 up | unknown protein                                                                                 |
| 103209 |   |   |   |   | + | + | + | + | + |          |          | unknown protein                                                                                 |
|        |   |   |   |   |   |   |   |   |   | 1.392    | 3.073    |                                                                                                 |
| 103215 |   |   |   |   | + |   | + |   |   | down     | down     | Cytochrome P450 CYP4/CYP19/CYP26 subfamilies                                                    |
| 103222 |   |   |   |   | + | + | + | + | + | 1.518 up | 2.257 up | Ribosomal protein S29 (S14 family) by homology to the corresponding protein of <i>N. crassa</i> |
|        |   |   |   |   |   |   |   |   |   | 1.127    | 4.801    |                                                                                                 |
| 103230 |   |   |   |   | + | + | + | + | + | down     | down     | Zn2Cys6 transcriptional regulator                                                               |
|        |   |   |   |   |   |   |   |   |   | 1.562    |          |                                                                                                 |
| 103236 |   |   |   |   |   |   |   |   |   | down     | 2.773 up | unknown protein                                                                                 |
| 103252 |   |   |   |   | + | + | + |   | + |          |          | unknown protein                                                                                 |
| 103273 |   |   |   |   | + | + | + |   |   |          |          | RNA polymerase II Elongator subunit                                                             |
| 103275 |   |   |   |   |   |   |   |   |   |          |          | C2H2 transcriptional regulator                                                                  |
| 103276 |   |   |   |   |   |   |   |   |   |          |          | unique protein                                                                                  |
| 103282 |   |   |   |   |   | + |   |   |   |          |          | unknown protein                                                                                 |
| 103286 |   |   |   |   |   | + |   |   |   | 1.300 up | 4.691 up | unique protein                                                                                  |



|        |   |   |   |   |   |   |            |            |                                                                |
|--------|---|---|---|---|---|---|------------|------------|----------------------------------------------------------------|
| 103291 |   |   |   |   |   |   |            |            | unknown protein                                                |
| 103302 |   | + |   |   |   |   |            |            | unknown protein                                                |
| 103303 |   |   |   |   |   |   |            |            | unknown protein                                                |
| 103311 | + | + | + | + | + | + |            |            | chromatin assembly factor 1 subunit C                          |
| 103312 |   |   |   |   |   |   |            |            | unknown protein                                                |
| 103321 | + | + | + | + | + | + |            |            | U4/U6.U5 tri-snRNP-associated protein                          |
| 103322 | + | + | + | + | + | + |            |            | translation initiation factor 4e [ <i>Neurospora crassa</i> ]. |
| 103330 |   |   |   |   |   |   |            |            |                                                                |
| 103335 |   |   |   |   |   |   | 1.274 up   | 5.229 up   | unknown protein                                                |
| 103336 |   |   |   |   |   |   |            |            | unknown protein                                                |
| 103348 |   |   |   |   |   |   |            |            | exosome complex exonuclease RRP4                               |
| 103350 | + | + | + | + | + | + |            |            | unknown protein                                                |
| 103356 | + | + | + | + | + | + | 1.124 down | 2.175 down | Vacuolar transporter chaperone                                 |
| 103364 |   |   |   |   |   |   |            |            | unknown protein                                                |
| 103366 |   |   |   |   |   |   |            |            | unknown protein                                                |
| 103372 | + | + | + | + | + | + | 1.646 down | 2.811 down | BZIP transcriptional regulator                                 |
| 103376 | + | + | + | + | + | + |            |            | unknown protein                                                |
| 103393 |   |   |   |   |   |   |            |            | SSCRP                                                          |
| 103394 |   |   |   |   |   |   | 1.079 down | 3.209 up   | unknown protein                                                |
| 103395 |   |   |   |   |   |   | 1.010 up   | 3.104 up   | unknown protein                                                |
| 103403 |   |   |   |   |   |   | 1.289 up   | 3.154 up   | unknown protein                                                |
| 103411 |   |   |   |   |   |   |            |            | unknown protein                                                |
| 103421 |   |   |   |   |   |   |            |            | unknown protein. only in Hypocreaceae                          |
| 103423 |   |   |   |   |   |   | 1.092 down | 2.619 up   | SSCRP                                                          |
| 103437 |   |   |   |   |   |   |            |            | unknown protein                                                |
| 103438 |   |   |   |   |   |   |            |            | unique protein                                                 |
| 103442 |   |   |   |   |   |   |            |            | unique protein                                                 |

|        |  |   |   |   |   |   |            |            |  |                                                        |
|--------|--|---|---|---|---|---|------------|------------|--|--------------------------------------------------------|
| 103446 |  |   |   |   |   |   |            |            |  | unknown protein                                        |
| 103447 |  |   |   |   |   |   | 1.104 up   | 2.307 down |  | unknown protein                                        |
| 103451 |  |   |   |   |   |   |            |            |  | GDP-forming succinate-CoA ligase. beta subunit         |
| 103455 |  |   |   |   |   |   | 3.006 up   | 3.367 up   |  | unknown protein                                        |
| 103458 |  |   |   |   |   |   |            |            |  | GH25 N.O-diacetylmuramidase                            |
| 103459 |  |   |   |   |   |   |            |            |  | unique protein                                         |
| 103463 |  |   |   |   |   |   |            |            |  | unknown protein                                        |
| 103470 |  |   |   |   |   |   |            |            |  | unknown protein                                        |
| 103482 |  | + |   |   |   |   | 1.723 down | 4.604 down |  | transcriptional activator with ariadne RING finger     |
| 103487 |  |   |   |   |   |   |            |            |  | glutathione S transferase                              |
| 103498 |  | + | + | + | + | + |            |            |  | unknown protein                                        |
| 103506 |  | + | + | + | + | + | 1.748 down | 2.197 down |  | unknown protein                                        |
| 103517 |  | + | + | + | + |   |            |            |  | pyrimidine 5'-nucleotidase. putative                   |
| 103537 |  |   |   |   |   |   | 21.752 up  | 15.724 up  |  | GCN5-N-acetyltransferase                               |
| 103555 |  | + | + | + | + | + |            |            |  | unknown protein                                        |
| 103560 |  |   |   |   |   |   |            |            |  | unknown protein                                        |
| 103563 |  |   |   |   |   |   |            |            |  | riboflavin biosynthesis protein Rib7                   |
| 103576 |  |   |   |   |   |   |            |            |  | unknown protein                                        |
| 103579 |  |   | + |   |   |   |            |            |  | unique protein. secreted. 1 TM                         |
| 103594 |  |   |   |   |   |   |            |            |  | unknown protein                                        |
| 103597 |  |   |   |   |   |   |            |            |  | unknown protein                                        |
| 103599 |  | + | + | + | + | + |            |            |  | ESF2. involved in pre-18S rRNA processing.             |
| 103613 |  |   |   |   |   |   |            |            |  | unique protein                                         |
| 103614 |  |   |   |   |   |   |            |            |  | unique protein                                         |
| 103618 |  | + | + | + | + | + |            |            |  | t-SNARE Ufe1; ER membrane fusion and vesicular traffic |
| 103625 |  | + | + | + | + | + |            |            |  | proteasome maturation factor UMP1. putative            |
| 103651 |  |   |   |   |   |   | 1.319 up   | 2.880 up   |  | unknown protein                                        |

|        |   |   |   |   |   |   |               |               |                                                                   |
|--------|---|---|---|---|---|---|---------------|---------------|-------------------------------------------------------------------|
| 103653 |   |   |   |   |   |   | 1.046<br>down | 2.489 up      | unique protein                                                    |
| 103655 |   |   |   |   |   |   | 1.654 up      | 2.620 up      | rad55                                                             |
| 103660 |   |   |   |   |   |   |               |               | unique protein                                                    |
| 103668 |   |   |   |   |   |   | 1.348<br>down | 2.508<br>down | unique protein                                                    |
| 103669 | + | + | + | + | + | + |               |               | $\alpha/\beta$ hydrolase lipase                                   |
| 103671 |   |   |   |   |   |   | 1.602<br>down | 3.810<br>down | unknown protein                                                   |
| 103683 |   |   |   |   |   |   | 1.654 up      | 2.075<br>down | unique protein                                                    |
| 103694 | + | + | + | + | + | + | 1.135<br>down | 6.223<br>down | PTH11 GPCR                                                        |
| 103695 |   |   |   |   |   |   |               |               | unknown protein                                                   |
| 103703 | + | + | + | + | + | + |               |               | Pex2/Pex12 amino terminal region                                  |
| 103712 |   |   |   |   |   |   |               |               | unknown protein                                                   |
| 103715 |   |   |   |   |   |   | 1.364 up      | 3.923 up      | unique protein                                                    |
| 103720 | + | + | + | + | + | + |               |               | unknown protein                                                   |
| 103725 |   |   |   |   |   |   |               |               | unknown protein                                                   |
| 103739 |   |   |   |   |   |   |               |               | Hsp27-ERE-TATA-binding protein/Scaffold attachment factor (SAF-B) |
| 103740 |   |   |   |   |   |   |               |               | unknown protein                                                   |
| 103745 | + | + | + | + | + | + |               |               | unknown protein                                                   |
| 103747 | + | + |   | + | + | + |               |               | unknown protein                                                   |
| 103751 |   |   |   |   |   |   |               |               | Zn2Cys6 transcriptional regulator                                 |
| 103754 |   | + | + |   |   |   |               |               | serine/threonine protein kinase. PAK/STE20 subfamily              |
| 103755 |   |   |   |   |   |   |               |               | unique protein                                                    |
| 103756 | + | + | + | + | + | + |               |               | ATP-dependent protease La                                         |
| 103761 |   |   |   |   |   |   |               |               | unknown protein                                                   |
| 103771 |   |   |   |   |   |   |               |               | unknown protein                                                   |
| 103772 |   |   |   |   |   |   |               |               | unknown protein                                                   |
| 103774 |   |   |   |   |   |   |               |               | unique protein                                                    |

|        |   |   |   |   |   |   |               |               |                                                |
|--------|---|---|---|---|---|---|---------------|---------------|------------------------------------------------|
| 103778 |   |   |   |   |   |   | 1.045<br>down | 6.708 up      | unique protein                                 |
| 103798 | + | + | + | + | + | + | 2.520<br>down | 3.567<br>down | SSCRP                                          |
| 103799 | + |   | + |   |   |   | 1.497<br>down | 2.834<br>down | unique protein                                 |
| 103801 |   |   |   |   |   |   |               |               | unknown protein                                |
| 103804 |   |   |   |   |   |   | 1.300<br>down | 2.422<br>down | SWI-SNF chromatin-remodeling complex protein   |
| 103812 | + | + | + | + |   |   |               |               | unknown protein                                |
| 103813 |   |   |   |   |   |   |               |               | Serine/threonine protein kinase                |
| 103822 |   |   |   |   |   |   |               |               | unknown protein                                |
| 103825 |   |   |   |   |   |   |               |               | CE16 acetyl esterase                           |
| 103827 |   |   |   |   |   |   |               |               | unique protein                                 |
| 103844 | + | + | + |   |   |   |               |               | unknown protein                                |
| 103850 |   |   | + | + |   |   |               |               | Beta-1.4-mannosyltransferase                   |
| 103852 | + |   |   |   |   |   | 1.057 up      | 2.304<br>down | unknown protein                                |
| 103853 | + | + | + | + | + | + |               |               | Mitochondrial carnitine/acyl carnitine carrier |
| 103861 | + | + | + |   |   |   |               |               | unknown protein                                |
| 103863 |   |   |   |   |   |   | 1.224 up      | 2.825 up      | unknown protein                                |
| 103865 | + | + | + | + | + | + |               |               | unknown protein                                |
| 103866 |   |   |   |   |   |   |               |               | unique protein                                 |
| 103886 | + | + | + | + | + | + | 1.097<br>down | 2.746<br>down | unknown protein                                |
| 103898 |   |   |   |   |   |   | 2.071 up      | 2.304 up      | unknown protein                                |
| 103900 |   |   |   |   |   |   | 1.039 up      | 3.474 up      | unknown protein                                |
| 103907 |   |   |   |   |   |   | 1.380 up      | 3.721<br>down | unknown protein                                |
| 103917 | + | + | + | + | + | + |               |               | unknown protein                                |
| 103920 |   |   | + |   |   |   |               |               | unknown protein. only in Magnaporthe           |

|        |   |   |   |   |   |   |               |               |                                     |
|--------|---|---|---|---|---|---|---------------|---------------|-------------------------------------|
| 103930 |   |   |   |   |   |   | 1.251<br>down | 2.725<br>down | unknown protein                     |
| 103937 |   | + | + | + | + | + |               |               | unknown protein                     |
| 103947 |   | + | + | + | + | + |               |               | unknown protein                     |
| 103949 |   | + | + | + | + | + | 1.170 up      | 2.376 up      | unknown protein                     |
| 103951 |   |   |   |   |   |   |               |               | PLP dependent enzymes class III     |
| 103959 |   |   |   | + |   |   | 1.069<br>down | 2.748 up      | unique protein                      |
| 103960 |   |   | + | + |   |   | 2.353<br>down | 3.107<br>down | nitrilase                           |
| 103973 |   | + | + | + | + | + | 1.398 up      | 4.665 up      | unknown protein                     |
| 103993 |   |   | + |   |   |   |               |               | RNA exonuclease 4                   |
| 103995 |   | + | + | + | + | + |               |               | unknown protein                     |
| 104000 |   | + | + | + | + | + | 1.918 up      | 2.158 up      | DNA repair protein rad18            |
| 104004 |   | + | + | + | + | + |               |               | transcriptional regulator. unknown  |
| 104015 |   | + | + | + | + | + |               |               | RNA polymerase Rpb8                 |
| 104016 |   |   | + |   |   |   | 1.120 up      | 2.070<br>down | unknown protein                     |
| 104021 |   |   |   | + |   |   |               |               | unknown protein                     |
| 104046 | + | + | + |   |   |   | 1.311 up      | 2.853 up      | unique protein                      |
| 104050 |   |   |   |   |   |   | 1.559<br>down | 14.834 up     | SSCRP                               |
| 104054 |   |   |   |   |   |   | 1.043 up      | 3.720 up      | unknown protein                     |
| 104059 |   |   |   |   |   |   | 1.067<br>down | 3.602 up      | short chain dehydrognease/reductase |
| 104060 |   |   |   |   |   |   | 1.197<br>down | 3.301 up      | short chain dehydrognease/reductase |
| 104061 |   |   |   |   |   |   |               |               | unknown protein                     |
| 104064 |   |   |   |   |   |   | 1.057<br>down | 3.660 up      | unknown protein                     |
| 104067 |   |   |   |   |   |   | 1.162<br>down | 6.266 up      | unknown protein                     |

|        |  |   |   |   |   |   |               |                |                                                                            |
|--------|--|---|---|---|---|---|---------------|----------------|----------------------------------------------------------------------------|
| 104071 |  |   |   |   |   |   | 1.019<br>down | 2.566 up       | unknown protein                                                            |
| 104072 |  |   |   |   |   |   |               |                | xylose transporter                                                         |
| 104073 |  |   |   |   |   |   |               |                | aspartate racemase                                                         |
| 104075 |  |   |   |   |   |   | 1.213<br>down | 2.653<br>down  | Zn2Cys6 transcriptional regulator                                          |
| 104077 |  |   |   |   |   |   | 1.291<br>down | 12.210<br>down | Amino acid transporter PotE                                                |
| 104079 |  |   |   |   |   |   | 1.112<br>down | 3.604 up       | MRSP1/expansin-like                                                        |
| 104081 |  |   |   |   |   |   | 1.026<br>down | 2.959 up       | coenzyme F420-dependent N5,N10-methylene tetrahydromethanopterin reductase |
| 104084 |  |   |   |   |   |   |               |                | unknown protein                                                            |
| 104089 |  |   |   |   |   |   |               |                | unknown protein                                                            |
| 104097 |  |   | + |   |   |   |               |                | unknown protein                                                            |
| 104102 |  |   |   |   |   |   |               |                | unknown protein                                                            |
| 104103 |  |   |   |   |   |   |               |                | short chain dehydrogenase/reductase                                        |
| 104104 |  |   |   |   |   |   |               |                | Zn2Cys6 transcriptional regulator                                          |
| 104106 |  |   |   |   |   |   | 1.073<br>down | 2.488 up       | ADP/ATP carrier protein                                                    |
| 104109 |  |   |   |   |   |   | 1.121 up      | 2.331 up       | unique protein                                                             |
| 104115 |  |   | + |   |   |   |               |                | Cytochrome P450 CYP2 subfamily                                             |
| 104116 |  |   |   |   |   |   |               |                | Zinc-containing alcohol dehydrogenase                                      |
| 104117 |  |   |   |   |   |   |               |                | unknown protein                                                            |
| 104118 |  |   |   |   |   |   | 1.156 up      | 5.813 up       | unique protein                                                             |
| 104121 |  | + | + | + | + | + |               |                | GT $\alpha$ -1.3-mannosyltransferase                                       |
| 104132 |  | + | + | + | + | + |               |                | unknown protein                                                            |
| 104135 |  |   |   |   |   |   |               |                | Thioredoxin. putative                                                      |
| 104137 |  |   |   |   |   |   |               |                | unknown protein                                                            |
| 104140 |  | + | + | + | + | + | 2.606 up      | 2.557 up       | 3-hydroxi-isobutyrate dehydrogenase                                        |
| 104141 |  | + | + | + | + | + |               |                | transcriptional regulator APSES type                                       |

|        |  |   |   |   |   |   |   |                |               |                                                                                                            |
|--------|--|---|---|---|---|---|---|----------------|---------------|------------------------------------------------------------------------------------------------------------|
| 104152 |  | + | + | + | + | + | + |                |               | unknown protein                                                                                            |
| 104156 |  | + |   |   |   |   |   |                |               | unknown protein                                                                                            |
| 104157 |  | + | + | + | + | + | + | 1.015<br>down  | 2.282 up      | unique protein                                                                                             |
| 104159 |  | + | + | + | + | + | + |                |               | MUS26 of <i>Neurospora crassa</i> .MUS26 is a probable homolog of Rev7p of <i>Saccharomyces cerevisiae</i> |
| 104161 |  | + | + | + | + | + | + |                |               | importin $\beta$ KapG                                                                                      |
| 104168 |  |   |   |   |   |   |   | 2.519 up       | 2.197 up      | unknown protein                                                                                            |
| 104171 |  |   |   |   |   |   |   |                |               | unknown protein                                                                                            |
| 104173 |  |   |   |   |   |   |   | 1.554<br>down  | 2.475 up      | unique protein                                                                                             |
| 104174 |  |   |   |   |   |   |   |                |               | unknown protein                                                                                            |
| 104175 |  |   |   |   |   |   |   | 1.211 up       | 2.594 up      | unique protein                                                                                             |
| 104179 |  |   |   |   |   |   |   |                |               | short chain dehydrogenase/reductase                                                                        |
| 104180 |  |   |   |   |   |   |   | 9.686<br>down  | 2.395<br>down | Ankyrin                                                                                                    |
| 104181 |  |   |   |   |   |   |   | 3.106 up       | 4.664 up      | SSCRP                                                                                                      |
| 104182 |  | + | + |   |   |   |   | 2.242<br>down  | 7.991<br>down | Zn2Cys6 transcriptional regulator                                                                          |
| 104197 |  |   |   |   |   |   |   |                |               | unknown protein                                                                                            |
| 104199 |  |   |   |   |   |   |   |                |               | unknown protein                                                                                            |
| 104200 |  |   |   |   |   |   |   | 3.939 up       | 5.335 up      | unknown protein. F-box                                                                                     |
| 104201 |  |   |   |   |   |   |   | 1.064<br>down  | 2.585 up      | unknown protein                                                                                            |
| 104202 |  |   |   |   |   |   |   |                |               | unique protein                                                                                             |
| 104203 |  |   |   |   |   |   |   |                |               | unknown protein                                                                                            |
| 104206 |  |   |   |   |   |   |   | 1.211 up       | 2.035 up      | SSCRP                                                                                                      |
| 104207 |  |   |   |   |   |   |   |                |               | unknown protein                                                                                            |
| 104209 |  |   |   |   |   |   |   | 1.146 up       | 3.511 up      | unknown protein                                                                                            |
| 104211 |  |   |   | + | + |   | + | 15.509<br>down | 24.344 up     | FKBP-type peptidyl-prolyl cis-trans isomerase                                                              |

|        |   |   |   |   |   |   |               |               |                                                        |
|--------|---|---|---|---|---|---|---------------|---------------|--------------------------------------------------------|
| 104215 |   |   |   |   |   |   | 1.454<br>down | 3.289<br>down | unknown protein                                        |
| 104217 |   |   |   |   |   |   |               |               | unknown protein                                        |
| 104219 |   |   |   |   |   |   |               |               | unknown protein                                        |
| 104220 |   |   |   |   |   |   |               |               | unique protein                                         |
| 104222 |   |   |   |   |   |   |               |               | GCN5-related acetyltransferase                         |
| 104227 |   |   |   |   |   |   | 1.120<br>down | 21.005 up     | SSCRP                                                  |
| 104228 |   |   |   |   |   |   | 1.048<br>down | 2.701 up      | unique protein                                         |
| 104230 | + | + | + | + | + | + |               |               | unknown protein                                        |
| 104231 | + | + | + | + | + | + | 1.087<br>down | 2.094<br>down | unknown protein                                        |
| 104239 | + | + | + | + | + | + |               |               | unknown protein                                        |
| 104243 |   |   |   |   |   |   |               |               | unknown protein                                        |
| 104251 |   |   |   |   |   |   |               |               | unknown protein                                        |
| 104260 |   |   |   |   |   |   | 1.303 up      | 3.683 up      | unknown protein                                        |
| 104261 |   |   |   |   |   |   | 1.323 up      | 6.012 up      | GCN5-related N-acetyltransferase                       |
| 104263 | + | + |   | + | + | + |               |               | unique protein                                         |
| 104272 |   |   |   |   |   |   |               |               | unknown protein                                        |
| 104276 |   |   |   |   |   |   | 1.269 up      | 2.652<br>down | unknown protein                                        |
| 104277 |   |   |   | + |   |   | 1.942<br>down | 2.882<br>down | cell wall protein. distantly related to A. niger CwpA. |
| 104286 |   |   |   |   |   |   | 1.065 up      | 2.845 up      | unique protein                                         |
| 104288 |   |   |   |   |   |   |               |               | phosphatidylethanolamine-binding protein               |
| 104289 |   |   |   |   |   |   | 1.048<br>down | 2.528 up      | unique protein                                         |
| 104291 |   | + |   |   |   |   |               |               | unknown protein                                        |
| 104292 |   |   |   |   |   |   | 1.803 up      | 2.411 up      | mating type pheromone precursor. alpha type            |
| 104293 |   |   |   |   |   |   | 1.430 up      | 4.472 up      | HFB5                                                   |



|        |   |   |   |   |   |   |   |   |            |            |                                             |
|--------|---|---|---|---|---|---|---|---|------------|------------|---------------------------------------------|
| 104294 |   |   |   |   |   |   |   |   | 1.215 up   | 5.465 up   | unknown protein                             |
| 104295 |   |   |   |   | + |   |   |   | 5.144 down | 5.720 up   | unknown protein                             |
| 104301 |   |   |   |   |   |   |   |   |            |            | unknown protein                             |
| 104302 |   |   |   |   |   |   |   |   |            |            | unknown protein                             |
| 104304 |   |   |   |   |   |   |   |   | 2.406 down | 3.822 down | unknown protein                             |
| 104310 |   |   | + | + |   |   |   |   |            |            | unknown protein                             |
| 104313 |   |   |   |   |   |   |   |   |            |            | unknown protein                             |
| 104318 |   |   |   |   |   |   |   |   |            |            | unknown protein                             |
| 104320 |   |   |   |   |   |   |   |   |            |            | MFS permease                                |
| 104322 |   |   | + | + | + | + |   |   |            |            | unique protein                              |
| 104325 |   |   | + | + | + | + | + | + |            |            | unknown protein                             |
| 104333 |   |   |   |   |   |   |   |   |            |            | unknown protein                             |
| 104334 |   |   |   |   |   |   |   |   | 1.156 down | 2.076 down | unknown protein                             |
| 104335 |   |   |   |   |   |   |   |   | 1.256 up   | 2.224 up   | unknown protein                             |
| 104336 |   |   |   |   |   |   |   |   | 1.324 down | 3.040 up   | unique protein                              |
| 104343 | + | + | + |   |   |   |   |   |            |            |                                             |
| 104351 |   |   |   |   |   |   |   |   | 2.431 up   | 2.871 up   | unique protein                              |
| 104353 |   |   |   |   |   |   |   |   | 1.651 up   | 2.210 up   | unknown protein. contains F-box             |
| 104354 |   |   |   |   |   |   |   |   | 1.047 up   | 2.685 up   | SSCRP                                       |
| 104356 |   |   |   |   |   |   |   |   |            |            | unknown protein                             |
| 104359 |   |   |   |   |   |   |   |   |            |            | unknown protein                             |
| 104364 |   |   | + | + | + | + | + | + |            |            | MAPK mitogen activated protein kinase STE20 |
| 104368 |   |   |   |   |   |   |   |   | 1.153 up   | 3.884 up   | unknown protein                             |
| 104369 |   |   |   |   |   |   |   |   | 1.052 down | 2.744 up   | unknown protein                             |
| 104370 |   |   | + | + | + | + | + | + |            |            | unknown protein                             |
| 104372 |   |   |   |   |   |   |   |   |            |            | ankyrin repeat protein. 1 TM                |

|        |   |   |   |   |   |   |   |   |   |            |            |                                                                    |
|--------|---|---|---|---|---|---|---|---|---|------------|------------|--------------------------------------------------------------------|
| 104373 |   |   |   |   |   |   |   |   |   | 1.217 up   | 4.060 up   | MRSP1/expansin-like                                                |
| 104377 |   |   |   |   |   |   |   |   |   | 1.198 down | 4.890 down | unknown protein                                                    |
| 104380 |   |   |   |   |   |   |   |   |   | 2.130 down | 5.726 down | Zn2Cys6 transcriptional regulator                                  |
| 104382 |   |   |   |   |   |   |   |   |   |            |            | unknown protein                                                    |
| 104390 |   |   |   |   |   |   |   |   |   | 3.773 up   | 2.563 down | glutathione S-transferase                                          |
| 104393 |   |   |   |   |   |   |   |   |   |            |            | SAM-dependent methyltransferase                                    |
| 104394 |   |   |   |   |   |   |   |   |   |            |            | esterase                                                           |
| 104395 |   |   |   |   |   |   |   |   |   | 1.098 up   | 2.721 down | unknown protein                                                    |
| 104399 | + | + | + |   |   |   |   |   |   | 1.149 up   | 2.696 up   | unique protein                                                     |
| 104400 |   |   |   |   |   |   |   |   |   |            |            | lipase/esterase ( $\alpha/\beta$ fold)                             |
| 104401 |   |   |   | + | + | + | + | + | + |            |            | HFBs                                                               |
| 104413 |   |   |   |   |   |   |   |   |   |            |            | unknown protein                                                    |
| 104415 |   |   |   |   |   |   |   |   |   |            |            | unknown protein                                                    |
| 104418 |   |   |   |   |   |   |   |   |   |            |            | Kynurenine 3-monooxygenase and related flavoprotein monooxygenases |
| 104419 |   |   |   | + | + |   | + | + | + | 1.090 down | 4.138 up   | unique protein. secreted                                           |
| 104421 |   |   |   |   |   |   |   |   |   | 1.220 up   | 4.106 up   | unknown protein                                                    |
| 104422 |   |   |   |   |   |   |   |   |   | 1.407 down | 9.137 up   | unknown protein                                                    |
| 104423 |   |   |   |   |   |   |   |   |   | 1.648 down | 4.053 up   | MRSP1/expansin-like                                                |
| 104425 |   |   |   |   |   |   |   |   |   |            |            | unknown protein                                                    |
| 104435 | + | + | + |   |   |   |   |   |   |            |            | unknown protein                                                    |
| 104437 |   |   |   | + | + | + |   |   | + | 3.382 up   | 2.494 up   | unknown protein                                                    |
| 104438 |   |   |   |   |   |   |   |   |   |            |            | FAD-binding. oxidoreductase                                        |
| 104448 |   |   |   | + | + | + |   |   |   |            |            | unknown protein                                                    |
| 104451 |   |   |   |   | + |   |   |   |   |            |            | retrograde regulation protein 2                                    |

|        |  |  |  |  |  |  |  |  |  |  |  |  |  |   |                                                                                          |
|--------|--|--|--|--|--|--|--|--|--|--|--|--|--|---|------------------------------------------------------------------------------------------|
| 104454 |  |  |  |  |  |  |  |  |  |  |  |  |  |   | unknown protein                                                                          |
| 104455 |  |  |  |  |  |  |  |  |  |  |  |  |  |   | unique protein                                                                           |
| 104458 |  |  |  |  |  |  |  |  |  |  |  |  |  |   | SSCRP                                                                                    |
| 104461 |  |  |  |  |  |  |  |  |  |  |  |  |  | + | Epoxide hydrolase                                                                        |
| 104463 |  |  |  |  |  |  |  |  |  |  |  |  |  | + | unknown protein                                                                          |
| 104469 |  |  |  |  |  |  |  |  |  |  |  |  |  | + | unknown protein                                                                          |
| 104474 |  |  |  |  |  |  |  |  |  |  |  |  |  | + | kinesin-like protein                                                                     |
| 104490 |  |  |  |  |  |  |  |  |  |  |  |  |  | + | v-SNARE Gos1. Golgi transport                                                            |
| 104491 |  |  |  |  |  |  |  |  |  |  |  |  |  | + | 60S ribosomal protein L35 (L29 family) by homology with the corresponding protein in oth |
| 104494 |  |  |  |  |  |  |  |  |  |  |  |  |  | + | unknown protein                                                                          |
| 104495 |  |  |  |  |  |  |  |  |  |  |  |  |  | + | Pre-mRNA-processing ATP-dependent RNA helicase<br>PRP5                                   |
| 104501 |  |  |  |  |  |  |  |  |  |  |  |  |  | + | unique protein                                                                           |
| 104511 |  |  |  |  |  |  |  |  |  |  |  |  |  | + | unique protein                                                                           |
| 104513 |  |  |  |  |  |  |  |  |  |  |  |  |  | + | Zn2Cys6 transcriptional regulator                                                        |
| 104514 |  |  |  |  |  |  |  |  |  |  |  |  |  |   | unknown protein                                                                          |
| 104533 |  |  |  |  |  |  |  |  |  |  |  |  |  | + | unique protein                                                                           |
| 104535 |  |  |  |  |  |  |  |  |  |  |  |  |  | + | unknown protein                                                                          |
| 104541 |  |  |  |  |  |  |  |  |  |  |  |  |  | + | unknown protein                                                                          |
| 104547 |  |  |  |  |  |  |  |  |  |  |  |  |  |   | unknown protein                                                                          |
| 104549 |  |  |  |  |  |  |  |  |  |  |  |  |  | + | MFS permease                                                                             |
| 104551 |  |  |  |  |  |  |  |  |  |  |  |  |  |   | unknown protein                                                                          |
| 104556 |  |  |  |  |  |  |  |  |  |  |  |  |  |   | unknown protein                                                                          |
| 104557 |  |  |  |  |  |  |  |  |  |  |  |  |  |   | short-chain dehydrogenase/reductase                                                      |
| 104573 |  |  |  |  |  |  |  |  |  |  |  |  |  | + | unknown protein                                                                          |
| 104576 |  |  |  |  |  |  |  |  |  |  |  |  |  | + | unique protein                                                                           |
| 104577 |  |  |  |  |  |  |  |  |  |  |  |  |  | + | unique protein                                                                           |

|        |   |  |   |   |   |   |   |               |               |                                                                                       |
|--------|---|--|---|---|---|---|---|---------------|---------------|---------------------------------------------------------------------------------------|
| 104584 |   |  | + | + | + | + |   |               |               | Epl1/Sm1                                                                              |
| 104585 |   |  |   |   |   |   |   | 1.082<br>down | 2.283 up      | unknown protein                                                                       |
| 104592 |   |  |   |   |   |   |   | 1.093<br>down | 2.779 up      | unknown protein                                                                       |
| 104593 |   |  |   |   |   |   |   | 2.936<br>down | 2.909<br>down | unknown protein with ankyrin. Leu-zipper and WD40                                     |
| 104595 |   |  | + | + | + | + | + | 1.134 up      | 2.185 up      | Ribosomal protein L7Ae/L30e/S12e/Gadd45. Homologue of yeast SNU13.                    |
| 104599 |   |  | + | + | + | + | + | 3.147<br>down | 5.473<br>down | Mandelate racemase/muconate lactonizing enzyme                                        |
| 104601 |   |  |   |   |   |   |   | 1.094 up      | 2.201<br>down | unknown protein                                                                       |
| 104606 |   |  | + | + | + | + | + |               |               | Iron-containing alcohol dehydrogenase                                                 |
| 104609 |   |  |   |   |   |   |   |               |               | UbiE/COQ5 ubiquinone methyltransferase                                                |
| 104617 |   |  | + | + | + |   |   | 1.218<br>down | 2.670<br>down |                                                                                       |
| 104623 | + |  | + | + | + | + | + |               |               | unknown protein                                                                       |
| 104639 |   |  | + | + | + | + | + |               |               | Transport protein Uso1                                                                |
| 104643 |   |  | + | + | + | + | + |               |               | unknown protein                                                                       |
| 104651 |   |  | + | + | + | + | + |               |               | unknown protein                                                                       |
| 104659 |   |  |   |   |   |   |   |               |               | unknown protein                                                                       |
| 104661 |   |  |   |   |   |   |   |               |               | unknown protein                                                                       |
| 104664 |   |  | + | + | + | + | + |               |               | Mitochondrial outer membrane and cell wall localized SUN family member required for m |
| 104683 |   |  | + | + | + | + | + |               |               | AAA ATPase                                                                            |
| 104684 |   |  | + | + | + |   |   |               |               | unknown protein                                                                       |
| 104691 |   |  | + | + | + | + | + |               |               | unknown protein                                                                       |
| 104695 |   |  | + | + | + | + |   | 1.708<br>down | 2.243 up      | unique protein                                                                        |
| 104704 |   |  | + | + | + | + | + |               |               | 60S ribosomal protein RML2. mitochondrial precursor from <i>Ashbya gossypii</i> .     |
| 104707 |   |  |   |   |   |   |   |               |               | unknown protein                                                                       |
| 104715 | + |  | + | + | + |   |   | 1.005<br>down | 2.905 up      | unique protein                                                                        |

|        |   |   |   |   |   |   |   |   |   |            |            |                                                       |
|--------|---|---|---|---|---|---|---|---|---|------------|------------|-------------------------------------------------------|
| 104716 | + | + | + |   |   |   |   |   |   | 1.076 up   | 3.999 up   | unique protein                                        |
| 104721 |   |   |   | + | + | + |   |   |   |            |            | Late Golgi transport protein Sft2                     |
| 104741 |   |   |   |   |   |   |   |   |   | 1.902 down | 4.389 down | unknown protein                                       |
| 104744 |   |   |   |   | + | + |   |   |   | 1.111 up   | 2.282 up   | cytochrome c oxidase assembly protein COX19. putative |
| 104750 |   |   |   |   | + |   |   |   |   |            |            | unique protein                                        |
| 104762 |   |   |   | + | + | + | + | + | + | 1.727 up   | 2.041 up   | unknown protein                                       |
| 104785 |   |   |   | + | + | + |   |   |   |            |            | unknown protein with SacI domain                      |
| 104786 |   |   |   | + | + | + | + | + | + |            |            | unknown protein                                       |
| 104790 |   |   |   | + | + | + | + | + | + |            |            | Tubulin gamma chain                                   |
| 104795 |   |   |   |   |   |   |   |   |   | 1.407 up   | 3.245 up   | unique protein                                        |
| 104797 |   |   |   |   |   |   |   |   |   |            |            | GH3 $\beta$ -glucosidase BGL3j                        |
| 104803 |   |   |   | + | + | + | + | + | + |            |            | carbon-nitrogen hydrolase                             |
| 104807 |   |   |   | + | + | + | + | + | + |            |            | unknown protein                                       |
| 104816 |   |   |   |   |   |   |   |   |   |            |            | MFS permease                                          |
| 104820 |   |   |   |   |   |   |   |   |   | 1.371 down | 2.073 down | unknown protein                                       |
| 104831 |   |   |   | + | + | + | + | + | + |            |            | unknown protein                                       |
| 104838 |   |   |   |   | + |   |   |   |   |            |            | unknown protein                                       |
| 104842 |   |   |   |   |   | + |   |   |   | 1.005 down | 2.241 down | transthyretin-like protein                            |
| 104856 |   |   |   | + | + | + | + | + | + |            |            | unknown protein                                       |
| 104867 |   |   |   |   |   |   |   |   |   |            |            | unique protein                                        |
| 104878 |   |   |   | + | + | + | + | + | + |            |            | unknown protein                                       |
| 104879 |   |   |   | + | + | + | + |   |   |            |            | unknown protein                                       |
| 104890 |   |   |   |   |   |   |   |   |   |            |            | 4-nitrophenylphosphatase                              |
| 104898 |   |   |   | + | + | + | + | + | + |            |            | unknown protein                                       |
| 104907 |   |   |   |   | + |   |   |   |   |            |            | unique protein                                        |
| 104911 |   |   |   | + |   | + |   |   | + | 1.099 down | 2.097 down | unknown protein                                       |
| 104923 |   |   |   |   |   |   |   |   |   | 1.072 up   | 3.090 up   | unique protein                                        |

|        |   |   |   |   |   |   |            |            |                                                                                       |
|--------|---|---|---|---|---|---|------------|------------|---------------------------------------------------------------------------------------|
| 104925 |   |   |   |   |   |   | 1.743 up   | 2.802 down | unknown protein                                                                       |
| 104927 |   |   |   |   |   |   | 3.427 up   | 4.123 up   | unique protein                                                                        |
| 104939 |   |   |   |   |   |   |            |            | unique protein                                                                        |
| 104942 | + | + | + | + | + | + |            |            | unknown protein                                                                       |
| 104952 |   | + | + | + | + | + |            |            | unknown protein                                                                       |
| 104958 | + | + | + |   | + |   |            |            | CTD kinase subunit gamma. putative                                                    |
| 104968 |   |   |   |   |   |   | 1.229 down | 2.768 down | unknown protein                                                                       |
| 104972 | + | + | + |   | + | + | 1.330 down | 2.083 down | glutathione synthase                                                                  |
| 104978 | + | + | + | + | + | + |            |            | unknown protein                                                                       |
| 104994 |   |   |   |   |   |   |            |            | Zn2Cys6 transcriptional regulator                                                     |
| 105003 |   |   |   |   |   |   | 4.968 down | 4.113 down | unknown protein                                                                       |
| 105011 |   |   |   |   |   |   |            |            | Phosphoribosylformimino--aminoimidazole carboxamide ribonucleotide (ProFAR) isomerase |
| 105019 |   |   |   |   |   |   |            |            | Heat shock protein DnaJ                                                               |
| 105026 | + | + | + | + | + | + |            |            | Nucleolar GTPase/ATPase p130                                                          |
| 105027 |   |   |   |   |   |   | 1.093 up   | 2.231 up   | unknown protein                                                                       |
| 105031 |   |   |   |   |   |   |            |            | RecQ subfamily of DNA helicases                                                       |
| 105035 | + | + | + | + | + | + |            |            | 3-oxo-5-alpha-steroid 4-dehydrogenase                                                 |
| 105051 |   | + |   |   |   |   |            |            | unknown protein                                                                       |
| 105054 | + | + | + | + | + | + |            |            | unknown protein                                                                       |
| 105055 | + | + | + | + | + | + |            |            | Ptpl Protein tyrosine phosphatase-like protein                                        |
| 105062 |   |   |   |   |   |   |            |            | SSCRP                                                                                 |
| 105070 |   |   |   |   |   |   |            |            | MetC Cystathionine beta-lyases/cystathionine gamma-synthases                          |
| 105072 | + | + | + | + | + | + |            |            | CE4 polysaccharide deacetylase                                                        |
| 105077 | + | + | + | + | + | + |            |            | pre-mRNA splicing factor ATP-dependent RNA helicase prp16                             |
| 105079 | + | + | + | + | + | + |            |            | unknown protein                                                                       |
| 105081 | + | + | + | + | + | + |            |            | peflin                                                                                |
| 105092 |   |   |   |   |   |   |            |            | unknown protein                                                                       |

|        |   |   |   |   |   |   |   |   |   |               |               |                                                |
|--------|---|---|---|---|---|---|---|---|---|---------------|---------------|------------------------------------------------|
| 105106 |   |   |   |   |   |   |   |   |   | 1.255 up      | 6.057<br>down | unique protein                                 |
| 105133 |   |   |   | + | + | + | + | + | + | 1.460 up      | 2.238 up      | unknown protein                                |
| 105143 | + | + | + |   |   |   |   |   |   | 1.323 up      | 5.834 up      | unique protein                                 |
| 105147 |   |   |   | + | + | + | + | + | + |               |               | unknown protein                                |
| 105150 |   |   |   |   |   |   |   |   |   |               |               | unique protein                                 |
| 105154 |   |   |   |   |   |   |   |   |   | 1.002<br>down | 2.745 up      | unknown protein                                |
| 105155 |   |   |   |   |   |   |   |   |   | 1.334 up      | 4.191 up      | unknown protein                                |
| 105156 |   |   |   |   |   |   |   |   |   | 1.034 up      | 10.673 up     | unique protein                                 |
| 105157 |   |   |   |   |   |   |   |   |   | 1.011 up      | 4.445 up      | unknown protein                                |
| 105158 |   |   |   |   |   |   |   |   |   | 1.390 up      | 2.330<br>down | unknown protein                                |
| 105165 |   |   |   |   |   |   |   |   |   |               |               | unique protein                                 |
| 105167 |   |   |   |   |   | + |   |   |   | 1.123 up      | 2.845 up      | unique protein                                 |
| 105171 |   |   |   |   |   |   |   |   |   | 1.023 up      | 4.463 up      | unknown protein                                |
| 105173 |   |   |   |   |   |   |   |   |   | 1.076 up      | 3.365 up      | unknown protein                                |
| 105174 |   |   |   |   |   |   |   |   |   |               |               | unique protein                                 |
| 105176 |   |   |   |   |   |   |   |   |   |               |               | unique protein                                 |
| 105187 |   |   |   |   |   |   |   |   |   | 1.130<br>down | 3.887 up      | unknown protein                                |
| 105189 |   |   |   | + | + | + | + | + | + |               |               | 20S proteasome beta-type subunit Pup1          |
| 105190 |   |   |   | + | + | + | + | + | + |               |               | unknown protein                                |
| 105191 |   |   |   | + | + | + | + | + | + |               |               | DNA-directed RNA polymerase. 30-40 kDa subunit |
| 105192 |   |   |   | + | + | + | + | + | + |               |               | NEDD8-activating enzyme E1 catalytic subunit   |
| 105196 |   |   |   |   | + | + |   |   |   |               |               | unknown protein                                |
| 105202 |   |   |   | + | + | + | + | + | + |               |               | Arp2/3 complex. 34kDa subunit p34-Arc          |
| 105206 |   |   |   |   |   |   |   |   |   | 1.399 up      | 3.470 up      | unique protein                                 |
| 105216 | + | + | + |   |   |   |   |   |   |               |               | unknown protein                                |
| 105220 |   |   |   |   |   |   |   |   |   | 5.424<br>down | 3.525<br>down | unknown protein                                |

|        |  |   |   |   |   |               |                |                                                                |
|--------|--|---|---|---|---|---------------|----------------|----------------------------------------------------------------|
| 105221 |  |   |   |   |   | 1.650<br>down | 2.028 up       | unknown protein                                                |
| 105222 |  |   |   |   |   | 1.081 up      | 3.648 up       | unique protein                                                 |
| 105223 |  |   |   |   |   | 1.179<br>down | 4.591<br>down  | unknown protein                                                |
| 105224 |  |   |   |   |   |               |                | PTH11 GPCR                                                     |
| 105233 |  |   |   |   |   | 1.129<br>down | 2.785 up       | unique protein                                                 |
| 105237 |  |   |   |   |   |               |                | SSCRP                                                          |
| 105238 |  |   |   |   |   |               |                | Taurine catabolism dioxygenase TauD/TfdA                       |
| 105239 |  |   |   |   |   | 1.161<br>down | 2.977<br>down  | Zn2Cys6 transcriptional regulator                              |
| 105242 |  |   |   |   |   |               |                | SAM-dependent methyltransferases                               |
| 105246 |  |   |   |   |   | 1.488 up      | 3.805 up       | GH23 exo-β-1.3-glucanase. distantly related                    |
| 105247 |  |   |   |   |   | 1.196 up      | 4.006 up       | dipeptidyl peptidase 5                                         |
| 105251 |  |   |   |   |   | 1.185<br>down | 2.724<br>down  | unknown protein                                                |
| 105255 |  |   |   |   |   | 1.609<br>down | 5.298<br>down  | Zn2Cys6 transcriptional regulator                              |
| 105260 |  | + | + | + | + | 2.886<br>down | 12.720<br>down | MFS permease                                                   |
| 105263 |  |   |   |   |   | 1.364<br>down | 3.222<br>down  | Zn2Cys6 transcriptional regulator                              |
| 105269 |  |   |   |   |   | 1.661<br>down | 2.011<br>down  | Zn2Cys6 transcriptional regulator                              |
| 105275 |  |   |   |   |   |               |                | unknown protein. secreted. contains parallel beta-helix repeat |
| 105279 |  |   |   |   |   | 1.861<br>down | 2.277 up       | Leucine aminopeptidase 1                                       |
| 105282 |  |   |   |   |   |               |                | short chain dehydrogenase/reductase                            |
| 105286 |  | + |   |   |   | 1.261<br>down | 2.546 up       | unknown protein                                                |
| 105287 |  | + |   |   |   |               |                | unknown protein                                                |



|        |   |   |   |   |   |   |   |   |   |   |  |  |  |  |  |  |  |                                       |
|--------|---|---|---|---|---|---|---|---|---|---|--|--|--|--|--|--|--|---------------------------------------|
| 105288 |   |   |   |   |   |   |   |   |   |   |  |  |  |  |  |  |  | unknown protein                       |
| 105290 |   |   |   |   |   |   |   |   |   |   |  |  |  |  |  |  |  | unknown protein                       |
| 105291 | + | + | + | + | + |   |   |   |   |   |  |  |  |  |  |  |  | unknown protein                       |
| 105311 |   |   |   |   |   |   |   |   |   |   |  |  |  |  |  |  |  | SSCRP                                 |
| 105313 |   |   |   |   |   |   |   |   |   |   |  |  |  |  |  |  |  | unique protein                        |
| 105315 |   |   |   |   | + | + | + | + | + | + |  |  |  |  |  |  |  | ribosomal protein L15                 |
| 105328 |   |   |   |   |   |   |   |   |   |   |  |  |  |  |  |  |  | unknown protein                       |
| 105330 |   |   |   |   |   |   |   |   |   |   |  |  |  |  |  |  |  | unknown protein                       |
| 105336 |   |   |   |   |   |   |   |   |   |   |  |  |  |  |  |  |  | unknown protein                       |
| 105338 |   |   |   |   |   |   |   |   |   |   |  |  |  |  |  |  |  | unknown protein                       |
| 105342 |   |   |   |   |   |   |   |   |   |   |  |  |  |  |  |  |  | Iron/ascorbate family oxidoreductases |
| 105346 |   |   |   |   |   |   |   |   |   |   |  |  |  |  |  |  |  | unknown protein                       |
| 105349 |   |   |   |   | + | + | + | + | + | + |  |  |  |  |  |  |  | unique protein                        |
| 105351 |   |   |   |   | + | + | + | + | + | + |  |  |  |  |  |  |  | cell cycle control protein cwf8       |
| 105356 |   |   |   |   |   |   |   |   |   |   |  |  |  |  |  |  |  | unknown protein                       |
| 105363 |   |   |   |   |   |   |   |   |   |   |  |  |  |  |  |  |  | aldolase/citrate lyase family protein |
| 105379 |   |   |   |   |   |   |   |   |   |   |  |  |  |  |  |  |  | isochorismatase family protein        |
| 105381 |   |   |   |   |   |   |   |   |   |   |  |  |  |  |  |  |  | unknown protein                       |
| 105383 |   |   |   |   |   |   |   |   |   |   |  |  |  |  |  |  |  | unknown protein                       |
| 105385 |   |   |   |   |   |   |   |   |   |   |  |  |  |  |  |  |  | unknown protein                       |
| 105386 |   |   |   |   |   |   |   |   |   |   |  |  |  |  |  |  |  | unknown protein                       |
| 105389 |   |   |   |   |   |   |   |   |   |   |  |  |  |  |  |  |  | unknown protein. 5 TM                 |
| 105391 |   |   |   |   |   |   |   |   |   |   |  |  |  |  |  |  |  | unknown protein                       |
| 105393 |   |   |   |   |   |   |   |   |   |   |  |  |  |  |  |  |  | unknown protein                       |
| 105401 |   |   |   |   | + | + | + | + | + | + |  |  |  |  |  |  |  | unknown protein. secreted             |

|        |   |   |   |   |   |   |                |               |                                                      |
|--------|---|---|---|---|---|---|----------------|---------------|------------------------------------------------------|
| 105405 |   |   |   |   |   |   | 1.174<br>down  | 2.990 up      | unique protein                                       |
| 105406 |   |   | + |   |   |   |                |               | unique protein                                       |
| 105407 | + | + | + | + | + | + |                |               | unknown protein                                      |
| 105408 | + | + | + | + | + | + |                |               | unique protein                                       |
| 105409 | + | + | + | + | + | + |                |               | regulator of MAPKKK STE50                            |
| 105420 |   |   |   |   |   |   |                |               | unknown protein                                      |
| 105423 | + | + | + | + | + | + |                |               | unknown protein                                      |
| 105432 | + | + | + | + | + | + |                |               | unknown protein with RING finger SH3 domain          |
| 105444 |   |   |   |   |   |   | 1.549<br>down  | 2.658 up      | SSCRP                                                |
| 105445 |   |   |   |   |   |   | 1.048 up       | 3.096 up      | unknown protein. only in Neurospora and A. fumigatus |
| 105447 |   |   |   |   |   |   | 1.074<br>down  | 4.082 up      | unknown protein                                      |
| 105448 |   |   |   |   |   |   | 1.215 up       | 5.686 up      | CBM 13                                               |
| 105449 |   |   |   |   |   |   | 1.020 up       | 3.699 up      | Cyclin C-dependent kinase CDK8                       |
| 105454 |   |   |   |   |   |   |                |               | SSCRP                                                |
| 105455 |   |   |   |   |   |   | 3.385<br>down  | 2.493<br>down | unknown protein                                      |
| 105457 |   |   |   |   |   |   | 1.195 up       | 2.697 up      | unknown protein                                      |
| 105458 |   |   |   |   |   |   |                |               | C2H2 transcription factor                            |
| 105465 |   |   |   |   |   |   |                |               | unknown protein                                      |
| 105466 |   |   |   |   |   |   |                |               | unknown protein                                      |
| 105467 |   |   |   |   |   |   | 1.053 up       | 3.546 up      | unknown protein                                      |
| 105475 | + | + | + | + | + | + |                |               | Zn2Cys6 transcriptional regulator                    |
| 105479 | + | + | + | + | + | + |                |               | ribosomal protein L23                                |
| 105483 |   |   |   |   |   |   |                |               | unique protein                                       |
| 105488 |   |   | + |   |   |   | 1.162 up       | 2.099 up      | unknown protein                                      |
| 105504 | + | + | + | + | + | + |                |               | Alkaline phosphatase. putative                       |
| 105514 |   |   |   |   |   |   | 23.554<br>down | 2.801<br>down | unique protein                                       |

|        |   |   |   |   |   |   |            |            |                                          |
|--------|---|---|---|---|---|---|------------|------------|------------------------------------------|
| 105515 |   |   |   |   |   |   | 2.915 up   | 5.259 up   | unique protein                           |
| 105518 |   |   |   |   |   |   | 2.552 down | 6.245 down | K+ channel                               |
| 105520 |   |   |   |   |   |   |            |            | Zn2Cys6 transcriptional regulator        |
| 105524 |   |   |   |   |   |   |            |            | unique protein                           |
| 105532 |   |   |   |   |   |   | 1.695 down | 2.322 up   | unique protein                           |
| 105533 | + |   |   |   |   |   |            |            | SSCRP                                    |
| 105535 | + | + | + | + | + | + |            |            | unknown protein                          |
| 105537 |   |   |   |   |   |   | 1.051 up   | 2.108 down | unknown protein                          |
| 105538 |   |   |   |   |   |   |            |            | unknown protein                          |
| 105540 |   |   |   |   |   |   | 1.033 down | 2.368 up   | unique protein                           |
| 105553 |   |   |   |   |   |   | 1.363 up   | 8.518 up   | unique protein                           |
| 105556 |   |   |   |   |   |   | 1.445 up   | 4.205 up   | unique protein                           |
| 105557 | + | + | + | + | + | + |            |            | GT32 $\alpha$ -glycosyltransferase       |
| 105565 |   |   |   |   |   |   |            |            | MFS permease                             |
| 105589 | + | + | + | + | + | + |            |            | mitochondrial ATPase inhibitor. putative |
| 105593 | + | + | + | + | + | + |            |            | unknown protein                          |
| 105597 | + | + |   |   |   | + | 1.101 up   | 2.615 down | unique protein                           |
| 105613 |   |   | + |   |   |   |            |            | unknown protein                          |
| 105617 |   |   |   |   |   |   |            |            | unknown protein                          |
| 105623 | + | + | + | + | + | + |            |            | ATP synthase subunit gamma precursor     |
| 105628 |   |   | + |   |   |   |            |            | unknown protein                          |
| 105631 |   |   | + |   |   |   |            |            | unknown protein                          |
| 105636 |   | + | + |   |   |   |            |            | unknown protein                          |
| 105643 |   |   |   |   |   |   | 1.135 down | 2.688 down | myb transcriptional regulator            |
| 105647 | + | + | + | + | + | + |            |            | unknown protein                          |

|        |   |  |   |   |   |   |   |   |             |            |  |                                                           |
|--------|---|--|---|---|---|---|---|---|-------------|------------|--|-----------------------------------------------------------|
| 105650 |   |  |   |   |   |   |   |   |             |            |  | unknown protein                                           |
| 105652 |   |  |   |   |   |   |   |   | 1.273 up    | 3.408 up   |  | unknown protein                                           |
| 105676 |   |  | + | + | + | + | + | + | 2.252 up    | 2.303 up   |  | DNA replication licensing factor mcm7                     |
| 105682 |   |  |   |   |   |   |   |   |             |            |  | unknown protein                                           |
| 105692 |   |  | + | + | + | + | + | + |             |            |  | Golgi reassembly stacking protein GRASP65                 |
| 105701 |   |  |   |   |   |   |   |   |             |            |  | unknown protein                                           |
| 105707 |   |  |   |   |   | + |   |   | 1.072 up    | 3.169 up   |  | unknown protein                                           |
| 105709 |   |  |   |   |   |   |   |   |             |            |  | unknown protein                                           |
| 105710 |   |  |   |   |   |   |   |   |             |            |  | unique protein                                            |
| 105718 |   |  |   |   |   |   |   |   | 1.979 down  | 7.431 down |  | unknown protein                                           |
| 105722 | + |  | + |   | + |   |   |   | 17.360 down | 4.027 down |  | unique protein                                            |
| 105729 |   |  |   |   |   |   |   |   | 1.012 up    | 2.767 up   |  | unknown protein                                           |
| 105748 |   |  |   |   |   |   |   |   |             |            |  | unique protein                                            |
| 105752 |   |  |   |   |   |   |   |   | 1.018 up    | 11.330 up  |  | C4-dicarboxylate transporter/malic acid transport protein |
| 105763 |   |  |   | + | + |   |   |   | 1.649 up    | 4.233 down |  | HFBs                                                      |
| 105765 |   |  |   |   |   |   |   |   | 1.009 up    | 4.102 down |  | unknown protein                                           |
| 105768 |   |  |   |   |   |   |   |   | 1.049 down  | 2.085 up   |  | Cytochrome P450                                           |
| 105771 |   |  |   | + | + | + | + |   |             |            |  | unknown protein                                           |
| 105775 | + |  | + |   | + |   |   |   | 2.536 down  | 2.195 down |  | unknown protein                                           |
| 105784 |   |  |   |   |   |   |   |   | 1.815 down  | 2.811 down |  | Zn2Cys6 transcriptional regulator                         |
| 105785 |   |  |   |   |   |   |   |   | 1.423 up    | 4.402 up   |  | unknown protein                                           |
| 105787 |   |  |   |   |   |   |   |   |             |            |  | unknown protein                                           |
| 105788 |   |  |   |   |   |   |   |   |             |            |  | aspartyl protease                                         |
| 105798 |   |  |   |   |   |   |   |   | 1.120 up    | 2.659 up   |  | MFS permease                                              |

|        |   |   |   |   |   |   |                |               |                                                       |
|--------|---|---|---|---|---|---|----------------|---------------|-------------------------------------------------------|
| 105804 |   |   |   |   |   |   | 1.193<br>down  | 3.352 up      | PKS                                                   |
| 105805 |   |   |   |   |   |   | 1.272 up       | 4.632 up      | Zn2Cys6 transcriptional regulator                     |
| 105806 |   |   |   |   |   |   | 1.436<br>down  | 3.782 up      | unknown protein                                       |
| 105808 |   |   |   |   |   |   |                |               | unknown protein                                       |
| 105810 | + | + | + | + | + | + |                |               | Peptidase M4. thermolysin. putative                   |
| 105816 |   |   |   |   |   |   |                |               | unknown protein                                       |
| 105820 |   |   |   |   |   |   | 1.237 up       | 2.642 up      | unknown protein                                       |
| 105823 |   |   |   |   |   |   | 27.139<br>down | 7.263<br>down | FAD binding domain protein                            |
| 105832 | + | + | + | + | + | + | 1.403<br>down  | 2.434<br>down | phosphoribosylaminoimidazole carbounknown proteinlase |
| 105834 |   |   |   |   |   |   | 1.110 up       | 3.049<br>down | Zn2Cys6 transcriptional regulator                     |
| 105838 |   |   |   |   |   |   | 1.160<br>down  | 2.210 up      | glyoxalase                                            |
| 105840 |   |   | + |   |   |   | 9.559<br>down  | 2.071 up      | unknown protein. 2 TMs                                |
| 105843 |   |   |   |   |   |   |                |               | unknown protein                                       |
| 105844 | + | + |   | + |   | + |                |               | SSCRP                                                 |
| 105847 |   |   |   |   |   |   |                |               | unique protein                                        |
| 105848 |   |   |   |   |   |   |                |               | unknown protein                                       |
| 105849 |   |   |   |   |   |   | 1.424<br>down  | 4.587<br>down | Zn2Cys6 transcriptional regulator                     |
| 105851 |   |   |   |   |   |   | 1.232<br>down  | 2.375<br>down | GMC oxidoreductase family protein                     |
| 105854 |   | + | + |   |   |   |                |               | unknown protein                                       |
| 105860 |   |   |   |   |   |   |                |               | unknown protein                                       |
| 105863 |   |   |   |   |   |   | 1.395 up       | 2.300<br>down | unknown protein                                       |
| 105864 |   |   |   |   |   |   |                |               | PKS-NRPS                                              |

|        |   |   |   |   |   |   |               |               |                                                                                       |
|--------|---|---|---|---|---|---|---------------|---------------|---------------------------------------------------------------------------------------|
| 105866 |   |   |   |   |   |   | 1.135<br>down | 2.615<br>down | unique protein                                                                        |
| 105867 |   |   |   |   |   |   | 1.058 up      | 3.986 up      | unique protein                                                                        |
| 105868 |   |   |   |   |   |   |               |               | unknown protein                                                                       |
| 105870 |   |   |   |   |   |   |               |               | Aquaporin (major intrinsic protein family)                                            |
| 105874 |   |   |   |   |   |   | 1.051 up      | 2.636<br>down | FAD binding domain-containing protein                                                 |
| 105880 |   |   |   |   |   |   |               |               | Zn2Cys6 transcriptional regulator                                                     |
| 105882 |   |   |   |   |   |   |               |               | unknown protein                                                                       |
| 105884 |   |   |   |   |   |   | 1.120 up      | 3.214 up      | short chain dehydrogenase/reductase                                                   |
| 105888 |   |   |   |   |   |   | 1.847 up      | 4.222 up      | short chain dehydrogenase/reductase                                                   |
| 105891 | + | + | + | + | + | + |               |               | serine-threonine kinase receptor-associated protein                                   |
| 105894 |   |   |   |   |   |   | 1.149 up      | 9.027 up      | unknown protein                                                                       |
| 105904 |   |   |   |   |   |   |               |               | unknown protein                                                                       |
| 105911 |   |   |   |   |   |   |               |               | unknown protein                                                                       |
| 105912 |   |   |   |   |   |   | 1.082<br>down | 2.348 up      | unknown protein                                                                       |
| 105917 | + | + | + | + | + | + |               |               | unknown protein                                                                       |
| 105924 |   |   |   |   |   |   |               |               | GT1 $\beta$ -glycosyltransferase                                                      |
| 105931 |   |   |   |   |   |   |               |               | GH20 N-acetyl- $\beta$ -hexosaminidase                                                |
| 105938 | + | + | + | + | + | + |               |               | pre-mRNA splicing factor slt11                                                        |
| 105956 |   |   |   |   |   |   |               |               | GH13 $\alpha$ -amylase                                                                |
| 105968 | + | + | + | + | + | + |               |               | Iron/ascorbate family oxidoreductases                                                 |
| 105969 |   |   |   |   |   |   |               |               | unknown protein                                                                       |
| 105970 |   |   |   |   |   |   |               |               | short chain dehydrogenase/reductase                                                   |
| 105975 |   |   |   |   |   |   |               |               | unknown protein                                                                       |
| 105977 |   |   |   |   |   |   | 1.379 up      | 2.139 up      | unknown secreted protein. 3 TM                                                        |
| 105978 |   |   |   |   |   |   | 1.676 up      | 2.003<br>down | ARO8. Transcriptional regulators containing a DNA-binding HTH domain and an aminotran |
| 105979 |   |   |   |   |   |   |               |               | Zn2Cys6 transcriptional regulator                                                     |
| 105980 |   |   |   |   |   |   |               |               | Zn2Cys6 transcriptional regulator                                                     |

|        |   |   |   |   |   |   |            |            |                                                                                           |
|--------|---|---|---|---|---|---|------------|------------|-------------------------------------------------------------------------------------------|
| 105983 |   |   |   |   |   |   | 1.085 up   | 2.706 up   | unknown protein                                                                           |
| 105984 |   | + | + | + |   |   |            |            | SSCRP                                                                                     |
| 105989 |   |   |   |   |   |   | 2.653 up   | 2.578 up   | Zn2Cys6 transcriptional regulator                                                         |
| 105994 |   | + | + | + | + | + |            |            | unknown protein                                                                           |
| 106009 |   |   |   |   |   |   | 1.133 down | 2.063 down | Zn2Cys6 transcriptional regulator                                                         |
| 106014 |   | + | + | + | + | + |            |            | Sorting Nexin Snx3                                                                        |
| 106016 |   |   |   |   |   |   |            |            | unknown protein                                                                           |
| 106018 |   | + | + | + | + | + | 2.107 up   | 2.312 up   | unknown protein                                                                           |
| 106023 |   | + | + | + |   |   |            |            | unknown protein                                                                           |
| 106024 |   |   | + |   |   |   | 1.429 up   | 3.875 up   | unknown protein                                                                           |
| 106029 |   | + | + | + |   |   | 1.994 down | 4.616 down | MFS permease                                                                              |
| 106035 |   | + |   | + |   |   |            |            | unknown protein                                                                           |
| 106037 |   | + | + | + | + | + |            |            | unknown protein                                                                           |
| 106039 |   | + | + | + | + | + |            |            | Ribosomal protein S28 based on homology to the corresponding protein of Neurospora crassa |
| 106041 | + | + | + |   |   |   | 1.216 up   | 3.105 up   | unique protein                                                                            |
| 106043 |   | + | + | + |   |   | 3.842 down | 4.265 down | unknown protein. GFA-domain                                                               |
| 106048 |   | + | + | + | + | + |            |            | C2H2 transcriptional regulator                                                            |
| 106049 |   |   |   |   |   |   |            |            | unknown protein. only in Hypocreaceae                                                     |
| 106051 |   | + | + | + | + | + |            |            | unknown protein                                                                           |
| 106055 |   |   |   |   |   |   |            |            | unknown protein                                                                           |
| 106064 |   |   | + |   |   |   |            |            | C2H2 transcriptional regulator                                                            |
| 106067 |   | + | + | + | + | + | 1.540 down | 3.028 up   | Chaperonin Cpn10                                                                          |
| 106081 |   | + | + | + | + | + |            |            | unknown protein                                                                           |
| 106082 |   | + |   |   |   |   | 1.358 down | 2.813 down | Epl1/Sm1                                                                                  |
| 106089 |   |   |   |   |   |   | 1.823 down | 5.089 down | unique protein                                                                            |

|        |   |   |   |   |   |   |            |            |                                                             |
|--------|---|---|---|---|---|---|------------|------------|-------------------------------------------------------------|
| 106107 |   |   |   |   |   |   | 1.429 up   | 2.523 up   | unknown protein                                             |
| 106108 | + | + | + | + | + | + |            |            | unknown protein                                             |
| 106111 | + | + | + |   |   |   |            |            | unique protein                                              |
| 106113 | + | + | + | + | + | + |            |            | Vesicle coat complex COPI. gamma subunit                    |
| 106116 |   |   |   |   |   |   | 2.227 up   | 3.324 up   | unknown protein                                             |
| 106118 |   |   |   |   |   |   | 1.221 down | 2.479 down | Inorganic phosphate transporter                             |
| 106120 |   |   | + |   |   |   | 19.812 up  | 13.457 up  | esterase/lipase                                             |
| 106129 | + | + | + |   |   |   | 1.554 down | 3.547 down | unknown protein. only present in ascomycota                 |
| 106130 | + | + | + | + | + | + | 1.346 down | 2.843 down | unknown protein                                             |
| 106131 |   |   |   |   |   |   |            |            | unknown protein                                             |
| 106138 |   |   |   |   |   |   | 2.081 down | 3.340 down | SNF2 family DNA-dependent ATPase                            |
| 106145 | + | + | + | + | + | + |            |            | unknown protein                                             |
| 106147 | + | + | + | + | + | + |            |            | unknown protein                                             |
| 106148 |   | + |   |   |   |   |            |            | unknown protein                                             |
| 106150 | + | + | + | + |   | + |            |            | Coenzyme Q (ubiquinone) biosynthesis protein Coq4. putative |
| 106151 |   |   |   |   |   |   | 1.136 up   | 7.677 up   | unknown protein                                             |
| 106152 |   |   |   |   |   |   | 1.488 up   | 2.079 up   | unknown protein                                             |
| 106154 |   | + |   |   |   |   | 1.368 up   | 2.699 down | unknown protein                                             |
| 106155 |   | + |   |   |   |   |            |            | unknown protein                                             |
| 106160 |   |   |   |   |   |   |            |            | unknown protein. secreted                                   |
| 106161 |   |   |   |   |   |   |            |            | Ankyrin                                                     |
| 106164 |   | + | + |   |   | + | 6.740 down | 2.623 up   | short chain dehydrogenase/reductase                         |
| 106168 |   |   |   |   |   |   | 1.325 up   | 3.414 up   | SSCRP                                                       |
| 106171 |   |   |   |   |   |   | 2.821 down | 3.232 up   | HET protein                                                 |



|        |   |   |   |   |   |   |   |   |             |             |                                                   |
|--------|---|---|---|---|---|---|---|---|-------------|-------------|---------------------------------------------------|
| 106178 |   |   |   |   |   |   |   |   |             |             | unknown protein                                   |
| 106181 |   |   |   |   |   |   |   |   | 1.265 up    | 11.629 down | unique protein                                    |
| 106205 |   |   | + | + | + | + | + | + |             |             | ubiquitin carboxyl-terminal hydrolase 2. putative |
| 106219 |   |   |   |   |   |   |   |   | 1.617 up    | 3.010 up    | unknown protein                                   |
| 106223 |   |   | + | + | + | + |   | + | 2.658 down  | 6.040 down  | unique protein                                    |
| 106229 |   |   | + | + | + |   |   |   |             |             | unique protein                                    |
| 106236 |   |   | + | + | + | + | + | + |             |             | unique protein                                    |
| 106237 |   |   | + | + | + | + | + | + |             |             | unknown protein                                   |
| 106242 |   |   |   |   |   |   |   |   | 1.424 down  | 2.404 down  | unique protein                                    |
| 106244 |   |   |   |   |   |   |   |   |             |             | Zn2Cys6 transcriptional regulator                 |
| 106245 |   |   |   |   |   |   |   |   | 1.665 down  | 4.117 down  | catalase                                          |
| 106248 |   |   |   |   |   | + |   |   | 1.696 up    | 3.534 up    | monosaccharide transporter (galactose permease ?) |
| 106249 |   |   | + | + | + | + | + | + |             |             | unknown protein                                   |
| 106250 |   |   | + | + | + | + | + | + |             |             | Glutamine amidotransferase. class-II              |
| 106251 |   |   |   |   |   |   |   |   |             |             | unique protein                                    |
| 106252 | + |   |   |   |   |   |   | + |             |             | unknown protein                                   |
| 106253 | + | + |   |   |   |   |   | + |             |             | unique protein                                    |
| 106258 |   |   |   |   |   |   |   |   |             |             | unknown protein                                   |
| 106259 |   |   |   |   |   |   |   | + |             |             | Zn2Cys6 transcriptional regulator                 |
| 106267 | + |   |   |   |   |   |   | + | 1.081 up    | 3.031 up    | unique protein                                    |
| 106270 |   |   |   |   |   |   |   |   | 46.214 down | 6.817 down  | unknown protein                                   |
| 106272 |   |   |   |   |   |   |   |   | 1.455 down  | 2.574 down  | PKS                                               |
| 106274 |   |   | + | + | + | + | + | + |             |             | unique protein                                    |
| 106276 |   |   |   |   |   |   |   | + | 1.087 down  | 3.132 down  | initiator tRNA phosphoribosyl transferase.        |

|        |   |   |   |   |   |   |            |            |                                                                 |
|--------|---|---|---|---|---|---|------------|------------|-----------------------------------------------------------------|
| 106283 | + | + | + | + | + | + |            |            | unknown protein                                                 |
| 106287 | + | + | + | + | + | + |            |            | unknown protein                                                 |
| 106294 | + | + | + |   |   |   |            |            | unknown protein. only in Magnaporthe. Neurospora and Chaetomium |
| 106296 |   |   |   |   |   |   |            |            | unknown protein                                                 |
| 106297 |   |   |   |   |   |   | 1.393 up   | 2.036 down | Amino acid transporters                                         |
| 106306 | + | + | + | + | + | + |            |            | unknown protein                                                 |
| 106308 | + | + | + | + | + |   |            |            | unknown protein                                                 |
| 106309 | + | + | + | + | + | + |            |            | unknown protein                                                 |
| 106314 |   |   |   |   |   |   | 1.306 up   | 6.595 down | Ankyrin                                                         |
| 106315 |   |   |   |   |   |   | 2.271 up   | 4.033 up   | serine protease                                                 |
| 106321 | + | + | + | + | + | + |            |            | unknown protein                                                 |
| 106330 |   |   | + |   |   |   |            |            | MFS permease                                                    |
| 106331 | + | + | + | + | + | + |            |            | TRAPP complex component Trs120                                  |
| 106337 | + | + | + | + | + | + |            |            | unknown protein                                                 |
| 106340 |   |   |   |   |   |   |            |            | unique protein                                                  |
| 106342 | + | + | + | + | + | + |            |            | unknown protein                                                 |
| 106353 |   |   |   |   |   |   |            |            | unknown protein                                                 |
| 106356 |   |   |   |   |   |   | 1.240 down | 2.196 down | unknown protein                                                 |
| 106357 | + | + | + | + | + | + |            |            | unknown protein                                                 |
| 106362 |   |   |   |   |   |   |            |            | unknown protein                                                 |
| 106370 | + | + | + | + | + | + |            |            | unknown protein                                                 |
| 106371 |   |   |   |   |   |   | 8.617 down | 2.322 down | SSCRP                                                           |
| 106378 |   |   |   |   |   |   |            |            | unknown protein                                                 |
| 106391 |   |   |   |   |   |   | 1.062 down | 3.506 down | unknown protein                                                 |
| 106405 |   |   |   |   |   |   | 1.978 up   | 3.158 up   | extracellular lipase-like protein                               |
| 106429 |   | + |   |   |   |   |            |            | unknown protein                                                 |

|        |   |   |   |   |   |   |   |   |   |               |               |                                                          |
|--------|---|---|---|---|---|---|---|---|---|---------------|---------------|----------------------------------------------------------|
| 106437 |   |   |   |   |   |   |   |   |   | 1.356<br>down | 2.581<br>down | unknown protein                                          |
| 106444 |   |   |   |   |   |   |   |   |   |               |               | unique protein                                           |
| 106445 |   |   |   |   |   |   |   |   |   | 1.126<br>down | 6.337 up      | unique protein                                           |
| 106450 |   |   |   |   |   |   |   |   |   |               |               | unique protein                                           |
| 106452 |   |   |   |   |   |   |   |   |   | 3.258<br>down | 4.639<br>down | unknown protein                                          |
| 106453 |   |   |   |   |   |   |   |   |   | 1.138 up      | 3.756 up      | SSCRP                                                    |
| 106457 |   |   |   |   |   |   |   |   |   |               |               | unknown protein                                          |
| 106467 |   |   |   |   |   |   |   |   |   |               |               | unknown protein                                          |
| 106470 | + | + | + |   |   |   |   |   |   | 1.047<br>down | 2.278 up      | unique protein                                           |
| 106471 | + | + | + | + | + | + | + | + | + |               |               | unknown protein                                          |
| 106473 |   |   |   | + | + | + | + | + | + |               |               | TATA box binding protein associated factor (TAF)         |
| 106475 |   |   |   |   |   |   |   |   |   |               |               | unknown protein                                          |
| 106476 |   |   |   |   |   |   |   |   |   |               |               | Zn2Cys6 transcriptional regulator                        |
| 106479 |   |   |   |   |   |   |   |   |   | 1.156 up      | 3.527 up      | unknown protein                                          |
| 106480 |   |   |   |   |   |   |   |   |   | 2.327 up      | 6.820 up      | flavoprotein monooxygenases                              |
| 106482 |   |   |   |   |   |   |   |   |   |               |               | unique protein                                           |
| 106484 |   |   |   |   |   |   |   |   |   |               |               | SSCRP                                                    |
| 106486 |   |   |   |   |   |   |   |   |   | 1.074 up      | 3.471 up      | unique protein                                           |
| 106487 |   |   |   |   |   |   |   |   |   |               |               | Protein kinase                                           |
| 106488 |   |   |   |   |   |   |   |   |   | 1.475<br>down | 3.615<br>down | unknown protein                                          |
| 106490 |   |   |   |   |   |   |   |   |   | 1.188 up      | 2.925 up      | unknown protein. 3 TM. only in Neurospora and Chaetomium |
| 106491 |   |   |   |   |   |   |   |   |   | 2.986<br>down | 5.048<br>down | unknown protein                                          |
| 106492 |   |   |   |   |   |   |   |   |   | 1.077 up      | 3.370 up      | SSCRP                                                    |
| 106493 |   |   |   |   |   |   |   |   |   | 1.085 up      | 2.974 up      | unknown protein                                          |
| 106494 |   |   |   |   |   |   |   |   |   |               |               | unknown protein                                          |

|        |   |   |   |   |   |   |               |           |                                                                                      |
|--------|---|---|---|---|---|---|---------------|-----------|--------------------------------------------------------------------------------------|
| 106499 |   |   |   |   |   |   | 1.377<br>down | 2.433 up  | unknown protein                                                                      |
| 106512 |   |   |   |   |   |   |               |           | unique protein                                                                       |
| 106516 |   |   |   |   |   |   |               |           | short chain dehydrogenase/reductase                                                  |
| 106531 | + | + | + | + | + | + |               |           | GTP-binding protein GTR1                                                             |
| 106533 | + | + | + | + | + | + |               |           | Rab GTPase interacting factor Yip1                                                   |
| 106537 |   |   |   |   |   |   |               |           | unique protein                                                                       |
| 106538 |   |   |   |   |   |   | 7.440 up      | 10.140 up | HFB4                                                                                 |
| 106539 |   |   |   |   |   |   |               |           | unknown protein                                                                      |
| 106554 |   |   |   |   |   |   |               |           | SSCRP                                                                                |
| 106556 |   |   |   |   |   |   | 1.458<br>down | 3.185 up  | unknown protein                                                                      |
| 106564 | + | + | + |   |   |   | 1.032 up      | 2.475 up  | unique protein                                                                       |
| 106569 |   | + | + |   |   |   |               |           | unknown protein                                                                      |
| 106570 | + | + | + | + | + | + |               |           | unknown protein                                                                      |
| 106575 |   |   | + |   |   |   |               |           | GH79 $\beta$ -glucuronidase                                                          |
| 106576 |   |   |   |   |   |   |               |           | unknown protein. 2 TM                                                                |
| 106583 |   |   |   |   |   |   | 1.121<br>down | 3.225 up  | unique protein                                                                       |
| 106584 |   |   |   |   |   |   |               |           | unique protein                                                                       |
| 106586 | + | + | + |   |   |   |               |           | unknown protein                                                                      |
| 106591 | + |   |   |   |   |   |               |           | unique protein                                                                       |
| 106595 | + | + | + | + | + | + |               |           | Signal recognition particle. subunit Srp54                                           |
| 106603 | + | + | + | + | + | + |               |           | Ras small GTPase.Rho Type;Related to S. pombe Septum promoting GTP binding protein 1 |
| 106604 |   |   |   |   |   |   | 1.092 up      | 2.819 up  | unique protein                                                                       |
| 106605 |   | + | + |   |   |   |               |           | unknown protein                                                                      |
| 106606 |   |   |   |   |   |   |               |           | unknown protein                                                                      |
| 106607 |   |   |   |   |   |   |               |           | unknown protein                                                                      |
| 106615 |   |   |   |   |   |   |               |           | SSCRP                                                                                |
| 106617 | + | + | + | + | + | + |               |           | NADH:ubiquinone oxidoreductase 17.2 kD subunit                                       |

|        |  |   |   |   |   |   |   |               |                                                               |                                             |
|--------|--|---|---|---|---|---|---|---------------|---------------------------------------------------------------|---------------------------------------------|
| 106623 |  |   |   |   |   |   |   |               | unknown protein                                               |                                             |
| 106624 |  |   |   |   |   |   |   |               | unique protein                                                |                                             |
| 106625 |  |   |   |   |   |   |   |               | unknown protein                                               |                                             |
| 106626 |  |   |   |   |   |   |   |               | unknown protein. SWIFT domain                                 |                                             |
| 106627 |  |   |   |   |   |   |   |               | unknown protein                                               |                                             |
| 106636 |  |   |   |   |   |   |   |               | unknown protein                                               |                                             |
| 106640 |  | + | + | + | + | + | + |               | translation initiation factor 3.                              |                                             |
| 106641 |  | + | + | + | + | + | + |               | unknown protein                                               |                                             |
| 106642 |  | + | + | + | + | + | + |               | unknown protein                                               |                                             |
| 106645 |  |   |   |   |   |   |   |               | unknown protein                                               |                                             |
| 106646 |  |   |   | + |   |   |   |               | unknown protein                                               |                                             |
| 106647 |  |   |   |   |   |   |   |               | unique protein                                                |                                             |
| 106649 |  |   |   |   |   |   |   |               | 3-hydroxyacyl-CoA dehydrogenase. NAD binding domain. putative |                                             |
| 106654 |  |   |   |   |   |   |   | 1.352<br>down | 4.265<br>down                                                 | Zn2Cys6 transcriptional regulator           |
| 106657 |  |   |   |   |   |   |   | 1.546<br>down | 2.603<br>down                                                 | Zn2Cys6 transcriptional regulator           |
| 106659 |  |   |   |   |   |   |   | 1.329<br>down | 5.170<br>down                                                 | unknown protein                             |
| 106660 |  |   |   |   |   |   |   |               |                                                               | unknown protein                             |
| 106661 |  |   |   |   |   |   |   | 1.727<br>down | 2.889 up                                                      | aspartyl protease                           |
| 106662 |  |   |   |   |   |   |   | 1.038 up      | 2.307 up                                                      | SSCRP                                       |
| 106676 |  |   |   |   |   |   |   |               |                                                               | unknown protein. only in Gibberella         |
| 106677 |  |   |   |   |   |   |   | 3.067<br>down | 3.773<br>down                                                 | Zn2Cys6 transcriptional regulator           |
| 106680 |  | + | + | + | + | + | + |               |                                                               | Nop10p family Nucleolar RNA-binding protein |
| 106684 |  |   |   |   |   |   |   | 1.611 up      | 3.536 up                                                      | unknown protein                             |
| 106686 |  |   |   | + |   |   |   | 2.277<br>down | 4.800 up                                                      | unknown protein                             |

|        |   |   |   |   |   |   |               |               |                                                               |
|--------|---|---|---|---|---|---|---------------|---------------|---------------------------------------------------------------|
| 106695 |   |   |   |   |   |   | 8.454<br>down | 2.670<br>down | Sulfite oxidase. molybdopterin-binding component              |
| 106697 |   |   |   |   |   |   | 2.150<br>down | 3.088<br>down | esterase/lipase. HGT                                          |
| 106706 |   |   |   |   |   |   | 1.414<br>down | 7.936<br>down | Zn2Cys6 transcriptional regulator                             |
| 106720 |   |   |   |   |   |   |               |               | Zn2Cys6 transcriptional regulator                             |
| 106730 | + | + | + | + | + | + |               |               | vacuole-associated enzyme activator complex component (Vac14) |
| 106731 | + | + | + | + |   |   |               |               | unknown protein                                               |
| 106743 | + | + | + |   |   |   |               |               | unknown protein                                               |
| 106744 | + | + | + | + | + | + |               |               | unknown protein                                               |
| 106755 |   | + |   |   |   |   |               |               | unknown protein                                               |
| 106761 | + | + | + | + | + | + |               |               | autophagy-related protein 9 . putative                        |
| 106769 | + | + | + | + | + | + |               |               | DNA repair protein Rad18                                      |
| 106781 |   |   |   |   |   |   |               |               | unknown protein                                               |
| 106797 |   |   |   |   |   |   |               |               | unknown protein                                               |
| 106798 |   |   | + |   |   |   | 3.762 up      | 4.706 up      | GCN5-N-acetyltransferase                                      |
| 106801 |   |   |   |   |   |   | 1.007 up      | 2.007<br>down | unknown protein                                               |
| 106812 | + | + | + | + | + | + | 1.106 up      | 4.957 up      | unique protein                                                |
| 106818 | + | + | + | + | + | + |               |               | unknown protein                                               |
| 106821 |   |   |   |   |   |   |               |               | unknown protein                                               |
| 106828 |   |   |   |   |   |   | 1.297 up      | 2.124<br>down | unknown protein                                               |
| 106829 |   |   |   |   |   |   |               |               | GCN5-N-acetyltransferase                                      |
| 106834 | + | + | + | + | + | + |               |               | unknown protein                                               |
| 106868 |   |   |   |   |   |   |               |               | unknown protein                                               |
| 106869 |   |   |   |   |   |   | 1.737 up      | 3.537 up      | unknown protein                                               |
| 106874 | + | + | + | + | + | + |               |               | unknown protein                                               |
| 106877 |   |   |   |   |   |   |               |               | unknown protein                                               |
| 106879 |   |   |   |   |   |   |               |               | unknown protein. secreted                                     |

|        |   |   |   |   |   |   |   |   |   |  |                                                                                         |
|--------|---|---|---|---|---|---|---|---|---|--|-----------------------------------------------------------------------------------------|
| 106885 |   |   |   |   |   |   |   |   |   |  | acyl-CoA dehydrogenase                                                                  |
| 106895 |   |   |   |   |   |   |   |   |   |  | unique protein                                                                          |
| 106897 | + | + | + |   |   |   |   |   |   |  | 1.367 up 2.386 up unique protein                                                        |
| 106900 |   |   |   |   |   |   |   |   |   |  | unique protein                                                                          |
| 106928 |   |   |   |   |   |   |   |   |   |  | 1.027 up 4.367 up Na/K ATPase alpha 1 subunit.                                          |
| 106936 |   |   |   |   |   |   |   |   |   |  | ferric reductase                                                                        |
| 106939 |   |   |   |   |   |   |   |   |   |  | 4.556 up 2.534 up protein kinase                                                        |
| 106947 |   |   |   |   |   |   |   |   |   |  | 1.833 up 3.657 up unique protein                                                        |
| 106951 |   |   |   | + | + | + | + | + | + |  | unknown protein                                                                         |
| 106958 |   |   |   | + | + | + |   |   |   |  | 1.115 up 2.764 down unique protein                                                      |
| 106960 |   |   |   |   |   |   |   |   |   |  | 1.109 down 4.269 up unknown protein                                                     |
| 106962 |   |   |   | + | + | + | + | + | + |  | RNA helicases and translation initiation factor eIF4a subunit. Homologue of yeast TIF2. |
| 106981 |   |   |   | + | + | + | + | + | + |  | unknown protein                                                                         |
| 106982 |   |   |   | + | + | + | + | + | + |  | unknown protein                                                                         |
| 106998 |   |   |   |   |   |   |   |   |   |  | 1.098 down 2.488 up unknown protein                                                     |
| 107002 |   |   |   |   |   |   |   |   |   |  | 1.448 down 3.478 down unknown protein                                                   |
| 107003 |   |   |   |   |   |   |   |   |   |  | 1.757 down 4.165 up unknown protein                                                     |
| 107005 |   |   |   | + | + | + | + | + | + |  | Guanine nucleotide exchange factor                                                      |
| 107007 |   |   |   |   |   |   |   |   |   |  | 1.101 down 2.283 up SSCRP                                                               |
| 107008 |   |   |   |   |   |   |   |   |   |  | 1.208 up 4.930 up unknown protein                                                       |
| 107011 |   |   |   | + | + | + | + | + | + |  | unknown protein                                                                         |
| 107012 |   |   |   | + | + | + |   |   |   |  | unknown protein                                                                         |
| 107014 |   |   |   |   |   |   |   |   |   |  | unknown protein                                                                         |
| 107031 |   |   |   |   |   |   |   |   |   |  | 1.255 down 2.560 up unique protein                                                      |

|        |   |   |   |   |   |   |            |            |                                                                       |
|--------|---|---|---|---|---|---|------------|------------|-----------------------------------------------------------------------|
| 107032 |   | + |   |   |   |   |            |            | unknown protein                                                       |
| 107035 | + | + | + | + |   |   |            |            | RAS small GTPase.Ras subfamily                                        |
| 107037 |   |   |   |   |   |   | 2.634 up   | 3.940 up   | unknown protein                                                       |
| 107042 |   |   |   |   |   |   | 2.094 up   | 2.118 up   | PTH11 GPCR                                                            |
| 107045 | + | + | + | + | + | + |            |            | FHA domain protein SNIP1                                              |
| 107055 | + | + | + | + | + | + | 1.572 down | 6.580 down | unknown protein                                                       |
| 107058 |   | + |   |   |   |   |            |            | unknown protein                                                       |
| 107068 |   |   |   |   |   |   |            |            | Suppressor of meioticSilencing                                        |
| 107070 |   |   |   |   |   |   | 1.036 down | 2.653 up   | unique protein                                                        |
| 107071 |   |   |   |   |   |   | 1.412 up   | 3.767 up   | HET-domain protein. unknown unknown                                   |
| 107072 |   |   |   |   |   |   |            |            | unknown protein                                                       |
| 107073 |   |   | + |   |   |   |            |            | Ca2+/calmodulin-dependent protein kinase. EF-Hand protein superfamily |
| 107076 |   |   |   |   |   |   |            |            | unique protein                                                        |
| 107078 | + | + | + | + | + | + |            |            | unknown protein                                                       |
| 107082 | + | + | + | + | + | + |            |            | unknown protein                                                       |
| 107107 |   |   |   |   |   |   | 1.193 down | 2.243 up   | unknown protein                                                       |
| 107111 | + | + | + | + | + | + | 1.258 down | 3.064 down | unknown protein                                                       |
| 107112 |   |   | + |   |   |   | 1.851 up   | 2.498 up   | unique protein                                                        |
| 107123 | + | + | + | + | + | + | 1.913 up   | 2.239 up   | mitochondrial import inner membrane translocase subunit tim16         |
| 107124 | + | + | + | + | + | + |            |            | GTP-binding protein                                                   |
| 107131 | + | + | + | + | + | + | 1.657 up   | 2.838 up   | unknown protein                                                       |
| 107132 | + | + | + | + | + | + |            |            | unknown protein                                                       |
| 107137 | + | + | + | + | + | + | 1.151 down | 2.205 down | sterol desaturase family                                              |
| 107140 | + | + | + | + | + | + |            |            | unknown protein                                                       |
| 107141 |   |   |   |   |   |   |            |            | unique protein                                                        |
| 107142 |   |   |   |   |   |   | 1.980 up   | 2.709 up   | neutral protease 2                                                    |



|        |   |  |   |   |   |   |   |   |            |            |                                                                                        |
|--------|---|--|---|---|---|---|---|---|------------|------------|----------------------------------------------------------------------------------------|
| 107144 |   |  |   |   |   |   |   |   |            |            | unknown protein                                                                        |
| 107146 |   |  |   |   |   |   |   |   | 1.009 up   | 2.363 up   | unknown protein                                                                        |
| 107151 |   |  | + | + | + | + | + | + |            |            | unknown protein                                                                        |
| 107158 |   |  | + | + | + | + | + | + |            |            | unknown protein                                                                        |
| 107168 |   |  |   | + |   |   |   |   |            |            | unknown protein                                                                        |
| 107172 |   |  |   |   |   |   |   |   |            |            | 2.2-dialkylglycine decarboxylase. AIB forming ?                                        |
| 107185 |   |  |   |   |   |   |   |   |            |            | unknown protein                                                                        |
| 107187 |   |  |   | + |   |   |   |   |            |            | unknown protein                                                                        |
| 107194 |   |  | + | + | + | + | + | + | 2.057 up   | 2.995 up   | unique protein                                                                         |
| 107197 | + |  | + |   |   |   |   |   |            |            | unknown protein                                                                        |
| 107202 |   |  |   |   |   | + |   |   | 3.857 down | 2.407 down | unknown protein                                                                        |
| 107205 |   |  | + | + | + | + | + | + |            |            | inositol phospholipid synthesis protein Scs3p. putative                                |
| 107206 |   |  |   |   |   |   |   |   |            |            | ATP adenyltransferase. putative                                                        |
| 107207 |   |  |   |   |   |   |   |   | 1.338 up   | 2.270 up   | HMG box-containing protein                                                             |
| 107208 |   |  |   |   |   |   |   |   | 1.057 up   | 2.665 up   | unique protein                                                                         |
| 107217 |   |  |   |   |   |   |   |   | 6.515 down | 2.752 down | unknown protein                                                                        |
| 107218 |   |  |   |   |   |   |   |   |            |            | unique protein                                                                         |
| 107229 |   |  |   |   |   |   |   |   |            |            | unique protein                                                                         |
| 107239 |   |  | + | + | + | + | + | + | 2.637 up   | 2.160 up   | microtubule protein BIM1. possibly involved in mating. karyogamy or meiosis            |
| 107244 |   |  | + | + | + | + | + | + |            |            | unknown protein                                                                        |
| 107245 |   |  | + | + |   |   |   |   |            |            | unknown protein                                                                        |
| 107253 |   |  |   |   |   |   |   |   |            |            | unknown protein                                                                        |
| 107255 |   |  |   |   |   |   |   |   |            |            | ADP-ribosylation factor-like protein 2. Ras small GTPase                               |
| 107258 |   |  | + | + | + | + | + | + | 1.087 up   | 2.331 down | 1-acyl-sn-glycerol-3-phosphate acyltransferase (Lysophosphatidic acid acyltransferase) |
| 107260 |   |  | + | + | + | + | + | + | 1.017 down | 2.150 down | unknown protein                                                                        |
| 107263 |   |  | + | + | + | + | + | + |            |            | phospholipase of papatin-family                                                        |

|        |   |   |   |   |   |   |   |   |               |                |                                                         |
|--------|---|---|---|---|---|---|---|---|---------------|----------------|---------------------------------------------------------|
| 107268 |   |   |   |   |   |   |   |   | 1.302<br>down | 2.148<br>down  | Esterase/lipase/thioesterase                            |
| 107278 |   |   |   |   |   |   |   |   |               |                | unique protein                                          |
| 107279 |   |   |   |   |   |   |   |   |               |                | unknown protein                                         |
| 107282 |   |   |   | + | + | + | + | + |               |                | unknown protein                                         |
| 107285 | + | + | + |   |   |   |   |   |               |                |                                                         |
| 107294 |   |   |   |   |   |   |   |   | 1.177<br>down | 2.568<br>down  | RTA1-like protein. 7 TM. responds to xenobiotic stimuli |
| 107297 |   |   |   |   |   |   |   |   | 3.011<br>down | 11.076<br>down | unique protein                                          |
| 107298 |   |   |   |   |   |   |   |   |               |                | unique protein                                          |
| 107300 |   |   |   | + | + | + | + | + |               |                | unique protein                                          |
| 107306 |   |   |   | + | + | + |   |   | 1.201 up      | 2.031<br>down  | unique protein                                          |
| 107323 |   |   |   |   |   |   |   |   |               |                | short chain dehydrogenase/reductase                     |
| 107325 |   |   |   | + | + | + | + | + |               |                | unknown protein                                         |
| 107329 |   |   |   |   |   |   |   |   | 1.361<br>down | 3.984 up       | methionine synthase                                     |
| 107335 |   |   |   | + | + | + | + | + |               |                | Ribosomal protein L10.                                  |
| 107338 |   |   |   |   |   |   |   |   |               |                | unique protein                                          |
| 107339 |   |   |   |   |   |   |   |   |               |                | unique protein                                          |
| 107340 |   |   |   | + | + | + | + | + | 2.102<br>down | 5.791<br>down  | unknown protein                                         |
| 107346 | + | + | + |   |   |   |   |   |               |                | unknown protein                                         |
| 107347 | + | + | + |   |   |   |   |   | 2.995 up      | 2.418 up       | SSCRP                                                   |
| 107349 |   |   |   |   |   |   |   |   | 1.248 up      | 2.496 up       | unknown protein                                         |
| 107357 |   |   |   |   |   |   |   |   |               |                | unique protein                                          |
| 107358 |   |   |   |   |   |   |   |   | 1.150<br>down | 2.227 up       | unique protein                                          |
| 107360 |   |   |   |   |   |   |   |   |               |                | unknown protein                                         |
| 107369 |   |   |   | + | + | + | + | + | 2.688<br>down | 3.284<br>down  | guanine nucleotide exchange factor-like protein         |

|        |   |   |   |   |   |   |             |            |                                                    |
|--------|---|---|---|---|---|---|-------------|------------|----------------------------------------------------|
| 107374 |   |   |   |   |   |   |             |            | unknown protein                                    |
| 107383 |   |   |   |   |   |   |             |            | arginine N-methyltransferase skb1                  |
| 107385 | + | + | + | + | + | + |             |            | ATP-dependent helicase Prp16                       |
| 107386 |   |   |   |   |   |   | 1.032 up    | 2.794 up   | unknown protein. only in Gibberella and Neurospora |
| 107389 | + | + | + | + | + | + |             |            | unknown protein                                    |
| 107402 | + | + | + | + | + | + |             |            | guanylate kinase                                   |
| 107420 | + | + | + | + | + | + |             |            | unknown protein                                    |
| 107436 | + | + | + | + | + | + |             |            | unknown protein                                    |
| 107445 | + | + | + | + | + | + | 1.087 up    | 3.595 up   | unknown protein                                    |
| 107460 | + | + | + | + | + | + |             |            | unknown protein                                    |
| 107463 | + | + | + | + | + | + | 2.112 down  | 2.059 down | exoribonuclease Dhp1                               |
| 107464 | + | + | + | + | + | + | 1.179 up    | 11.473 up  | unknown protein                                    |
| 107469 |   |   |   |   |   |   |             |            | unique protein                                     |
| 107475 |   |   |   |   |   |   | 1.673 down  | 3.812 down | unknown protein                                    |
| 107479 |   |   |   |   |   |   |             |            | ZIP zinc/iron transporter                          |
| 107483 | + | + | + | + | + | + | 1.037 up    | 2.775 down | unknown protein                                    |
| 107488 |   |   |   |   |   |   | 1.111 up    | 2.913 up   | unknown protein                                    |
| 107490 | + | + | + | + | + | + |             |            | unknown protein                                    |
| 107494 |   |   |   |   |   |   | 8.068 down  | 4.350 down | unique protein                                     |
| 107495 |   |   |   |   |   |   | 25.930 down | 2.009 down | unknown protein                                    |
| 107502 |   |   |   |   |   |   |             |            | unknown protein                                    |
| 107503 | + | + | + | + | + | + |             |            | unknown protein                                    |
| 107507 |   |   |   |   |   |   | 8.541 up    | 3.427 up   | unknown protein                                    |
| 107509 |   | + | + | + | + | + |             |            | autophagy protein 16. putative                     |
| 107513 |   |   |   |   |   |   | 1.801 up    | 2.031 up   | unique protein                                     |
| 107523 |   |   |   |   |   |   |             |            | unknown protein                                    |

|        |   |   |   |   |   |   |               |               |                                           |
|--------|---|---|---|---|---|---|---------------|---------------|-------------------------------------------|
| 107524 | + | + | + |   |   |   | 1.048<br>down | 2.835<br>down | unique protein                            |
| 107525 |   |   |   |   |   |   |               |               | unknown protein. only in fungi            |
| 107526 |   |   |   |   |   |   | 1.014<br>down | 2.315 up      | short chain dehydrogenase/reductase       |
| 107541 |   |   |   |   |   |   |               |               | myb transcriptional regulator             |
| 107547 |   |   |   |   |   |   |               |               | unknown protein                           |
| 107551 | + | + | + | + | + | + |               |               | unknown protein                           |
| 107552 | + | + | + | + | + | + |               |               | unknown protein                           |
| 107554 | + | + | + | + |   | + | 1.815<br>down | 2.036<br>down | glutathione transferase                   |
| 107564 | + | + | + | + | + | + | 2.034 up      | 2.146 up      | Sin3-associated polypeptide Sap18         |
| 107567 | + | + | + | + | + | + |               |               | unknown protein                           |
| 107571 | + | + | + | + | + |   |               |               | unknown protein                           |
| 107577 | + | + | + | + | + | + |               |               | unknown protein                           |
| 107591 | + | + | + | + | + | + |               |               | unknown protein                           |
| 107595 |   |   |   |   |   |   | 1.072 up      | 2.779 up      | unique protein                            |
| 107596 |   |   |   |   |   |   |               |               | unique protein                            |
| 107601 | + | + | + | + | + | + | 1.169<br>down | 2.275 up      | unknown Zn-finger protein. Tim10/DPP type |
| 112695 |   |   |   |   |   |   | 1.011 up      | 2.453 up      | SSCRP                                     |
| 119534 | + | + | + | + | + | + | 1.220<br>down | 2.526<br>down | unique protein                            |
| 119548 | + | + | + | + | + | + |               |               | mitotic checkpoint protein BUB3           |
| 119551 | + | + | + | + | + | + |               |               | mitochondrial carrier protein LEU5        |
| 119552 | + | + | + | + | + | + | 1.189 up      | 2.725 up      | unique protein                            |
| 119554 | + | + | + | + | + | + |               |               | rRNA processing protein Bystin            |
| 119555 |   |   |   |   |   |   |               |               | unknown protein                           |
| 119556 |   |   |   |   |   |   | 2.752<br>down | 2.620<br>down | unknown protein. secreted                 |

|        |   |   |   |   |   |   |               |               |                                                                                             |
|--------|---|---|---|---|---|---|---------------|---------------|---------------------------------------------------------------------------------------------|
| 119568 | + | + | + | + | + | + | 1.206<br>down | 3.590<br>down | unknown protein                                                                             |
| 119576 |   |   |   |   |   |   |               |               | unknown protein. only present in ascomycota and Streptomyces                                |
| 119578 | + | + | + | + | + | + |               |               | Cargo transport protein Erv29                                                               |
| 119592 | + | + | + | + | + | + |               |               | High affinity Ca <sup>2+</sup> /Mn <sup>2+</sup> P-type ATPase (Golgi)                      |
| 119593 | + | + | + | + | + | + |               |               | Has homology to tubuling binding cofactor A.                                                |
| 119600 | + | + | + | + | + | + |               |               | Oligosaccharyltransferase. alpha subunit                                                    |
| 119603 |   |   |   |   |   |   |               |               | methylthioribulose-1-phosphate dehydratase                                                  |
| 119607 |   |   |   |   |   |   | 1.762<br>down | 2.907<br>down | unknown protein                                                                             |
| 119609 | + | + | + | + | + | + |               |               | Phospho-2-dehydro-3-deoxyheptonate aldolase                                                 |
| 119614 | + | + | + | + | + | + |               |               | CAMP dependent serine/threonine protein kinase related to S.Cerevisiae Sch9                 |
| 119616 |   |   |   |   |   |   |               |               | Serine/threonine protein kinase                                                             |
| 119619 |   |   |   |   |   |   | 4.165<br>down | 2.780<br>down | unknown protein                                                                             |
| 119620 |   |   |   |   |   |   | 1.343<br>down | 2.295<br>down | Zn2Cys6 transcriptional regulator                                                           |
| 119623 |   |   | + |   |   |   |               |               | tRNA pseudouridine synthase D.                                                              |
| 119624 |   |   |   |   |   |   |               |               | unknown protein                                                                             |
| 119626 | + | + | + | + | + | + |               |               | 40s ribosomal protein S22 (S8 family) by homology to the corresponding protein of N. crassa |
| 119633 | + | + | + | + | + | + |               |               | unknown protein                                                                             |
| 119638 | + | + | + | + | + | + |               |               | unknown protein                                                                             |
| 119642 | + | + | + | + | + | + |               |               | unknown protein                                                                             |
| 119645 | + | + | + |   |   |   |               |               | unknown protein                                                                             |
| 119651 | + | + | + | + | + | + |               |               | ribosomal protein L16                                                                       |
| 119658 | + | + | + | + | + | + |               |               | unknown protein                                                                             |
| 119664 | + | + | + | + | + | + |               |               | ubiquitin carboxyl-terminal hydrolase. putative                                             |
| 119679 |   | + |   |   |   |   |               |               | calcium/calmodulin dependent protein kinase C. related to E. nidulans cmkC                  |
| 119681 | + | + | + | + | + | + |               |               | Component. Pan1. of actinCytoskeleton-regulatoryComplex Pan1p-Sla1p-End3p. involved         |
| 119690 | + | + | + | + | + | + |               |               | unknown protein                                                                             |
| 119694 | + | + |   |   |   |   |               |               | unknown protein                                                                             |

|        |   |   |   |   |   |   |               |               |                                                                                            |
|--------|---|---|---|---|---|---|---------------|---------------|--------------------------------------------------------------------------------------------|
| 119695 |   |   |   |   |   |   |               |               | RNA:NAD 2'-phosphotransferase TPT1.                                                        |
| 119696 | + | + | + | + | + | + |               |               | lipase. extracellular                                                                      |
| 119697 | + | + | + | + | + | + |               |               | Tyrosine specific and dual specificity protein phosphatase. containsTonB box. N-terminal   |
| 119704 | + | + | + | + | + | + |               |               | unknown protein                                                                            |
| 119707 | + | + | + | + | + | + |               |               | calponin-like actin binding domain                                                         |
| 119710 | + | + | + |   |   |   | 3.821<br>down | 4.284<br>down | MFS multidrug transporter                                                                  |
| 119721 | + | + | + | + | + | + |               |               | U4/U6.U5 tri-snRNP-associated protein snu66                                                |
| 119723 | + | + | + | + | + | + | 1.044<br>down | 2.050<br>down | NSF attachment protein Sec17/alpha-SNAP                                                    |
| 119724 | + | + | + | + | + | + |               |               | unknown protein                                                                            |
| 119731 | + | + | + | + | + | + |               |               | heat shock protein hsp60 mitochondrial precursor protein                                   |
| 119732 |   |   |   |   |   |   |               |               | unknown protein                                                                            |
| 119735 | + | + | + | + | + | + |               |               | Glyceraldehyde-3-phosphate dehydrogenase. isozyme 2                                        |
| 119739 | + | + | + | + | + | + |               |               | unknown protein                                                                            |
| 119742 | + | + | + | + | + | + |               |               | Vesicle coat complex COPII. Sec31                                                          |
| 119749 | + | + | + | + | + | + |               |               | Signal recognition particle. subunit Srp19                                                 |
| 119757 | + | + | + | + | + | + |               |               | RNA splicing factor Pad-1                                                                  |
| 119759 | + | + | + | + | + | + |               |               | BZIP transcriptional regulator                                                             |
| 119762 | + | + | + | + | + | + |               |               | key endocytic protein. Ede1. involved in a network of interactions with other endocytic pr |
| 119764 | + | + | + |   |   |   |               |               | unknown protein                                                                            |
| 119767 |   |   |   |   |   |   |               |               | alpha-tubulin cofactor B.                                                                  |
| 119768 | + | + | + | + | + | + |               |               | myb transcriptional regulator                                                              |
| 119779 |   |   |   |   |   |   |               |               | unknown protein                                                                            |
| 119788 | + | + | + | + | + | + |               |               | saccharopine dehydrogenase                                                                 |
| 119789 | + | + | + | + | + | + | 1.369<br>down | 2.762<br>down | MFS permease                                                                               |
| 119790 |   |   |   |   |   |   |               |               | myo-inositol oxygenase .                                                                   |
| 119792 | + | + | + | + | + | + |               |               | unknown protein                                                                            |
| 119796 |   |   |   |   |   |   |               |               | unknown protein                                                                            |

|        |   |   |   |   |   |   |            |             |                                                                                  |
|--------|---|---|---|---|---|---|------------|-------------|----------------------------------------------------------------------------------|
| 119797 | + | + | + | + | + | + |            |             | SSCRP                                                                            |
| 119800 | + | + | + | + | + | + | 1.953 up   | 2.000 up    | unknown protein                                                                  |
| 119803 |   | + |   |   |   |   |            |             | Meiosis-specific protein. required for spore wall formation during sporulation   |
| 119805 | + | + | + | + |   | + | 1.232 up   | 2.096 up    | HFBs                                                                             |
| 119806 | + | + | + |   |   |   | 1.723 up   | 2.677 up    | unknown protein. only in Gibberella. Magnaporthe and Chaetomium                  |
| 119812 | + | + | + | + | + | + |            |             | unknown protein                                                                  |
| 119813 | + | + | + | + | + | + |            |             | unknown protein                                                                  |
| 119815 | + | + | + | + | + | + |            |             | unknown protein                                                                  |
| 119816 | + | + | + | + | + | + | 1.562 up   | 2.392 up    | unknown protein                                                                  |
| 119819 |   | + |   |   |   |   |            |             | GPCR. mPR-type                                                                   |
| 119822 | + | + | + | + | + |   |            |             | Serine/threonine protein kinase                                                  |
| 119823 |   |   |   |   |   |   | 1.635 down | 2.686 down  | SAM-dependent methyltransferases                                                 |
| 119825 |   |   |   |   |   |   | 1.242 up   | 3.237 up    | unknown protein                                                                  |
| 119826 |   |   |   |   |   |   | 2.461 down | 18.872 down | C2H2 transcriptional regulator                                                   |
| 119830 | + | + | + | + | + | + |            |             | kinesin-like protein                                                             |
| 119839 |   |   |   |   |   |   | 1.805 down | 2.966 up    | cyanamide hydratase                                                              |
| 119844 |   |   |   |   |   |   |            |             | unknown protein                                                                  |
| 119845 | + | + | + | + | + | + |            |             | mitochondrial oxaloacetate/sulfate/thiosulfate transporter-like protein          |
| 119848 | + | + | + | + | + | + |            |             | DEAD helicases superfamily protein (Aquarius). putative                          |
| 119850 | + | + | + | + | + | + |            |             | unknown protein                                                                  |
| 119854 | + | + | + | + | + | + |            |             | myotubularin (protein phosphatase)                                               |
| 119855 | + | + | + | + | + | + |            |             | 40s ribosomal protein                                                            |
| 119856 | + | + | + | + | + | + | 1.007 down | 2.034 down  | E3 ubiquitin-protein ligase/Putative upstream regulatory element binding protein |
| 119857 |   |   |   |   |   |   | 21.231 up  | 8.567 up    | unique protein                                                                   |
| 119859 |   |   |   |   |   |   |            |             | GH18. chitinase CHI18-13                                                         |
| 119860 |   |   |   |   |   |   | 1.423 up   | 2.222 down  | unknown protein                                                                  |

|        |   |   |   |   |   |   |               |               |                                                                              |
|--------|---|---|---|---|---|---|---------------|---------------|------------------------------------------------------------------------------|
| 119864 |   |   |   |   |   |   | 9.027<br>down | 4.933<br>down | unknown protein                                                              |
| 119867 |   |   |   |   |   |   |               |               | unknown protein                                                              |
| 119871 | + | + | + | + | + | + |               |               | Ras GTPase of Rho subfamily                                                  |
| 119875 |   |   |   |   |   |   |               |               | acyl-CoA thioesterase                                                        |
| 119876 | + | + | + |   |   |   | 1.103 up      | 2.027 up      | aspartyl protease                                                            |
| 119879 | + | + | + | + | + | + |               |               | Rab geranylgeranyl transferase escort protein. putative                      |
| 119881 | + | + | + | + | + | + |               |               | unknown protein                                                              |
| 119887 | + | + | + | + | + | + |               |               | unknown protein                                                              |
| 119890 |   |   |   |   |   |   |               |               | Protein disulfide isomerase TigA                                             |
| 119895 | + | + | + | + | + | + | 1.040 up      | 2.374<br>down | unknown protein                                                              |
| 119896 | + | + | + | + | + | + | 1.306<br>down | 3.683<br>down | malic enzyme                                                                 |
| 119898 | + | + | + | + | + | + |               |               | ribosome biogenesis GTPase Lsg1                                              |
| 119902 | + | + | + | + |   | + | 4.795<br>down | 2.418<br>down | unique protein                                                               |
| 119903 | + | + | + | + |   | + |               |               | Der1. and ER membrane protein involved in ER-associated protein degradation. |
| 119924 | + | + | + | + | + | + |               |               | Hsp70 nucleotide exchange factor FES1. putative                              |
| 119931 | + | + | + | + | + | + |               |               | fatty acid elongase                                                          |
| 119933 | + | + | + | + | + | + |               |               | unknown protein                                                              |
| 119940 | + | + | + |   |   |   |               |               | unique protein                                                               |
| 119943 | + | + | + | + | + | + |               |               | unknown protein                                                              |
| 119947 | + | + | + | + |   | + |               |               | unknown protein                                                              |
| 119954 | + | + | + | + | + | + |               |               | porphobilinogen synthase-like protein                                        |
| 119956 | + |   | + | + |   | + |               |               | unknown protein                                                              |
| 119960 |   |   |   |   |   |   | 1.254 up      | 2.295 up      | unique protein                                                               |
| 119963 | + |   | + | + |   | + | 1.202 up      | 2.031 up      | HFBs                                                                         |
| 119965 | + | + | + | + | + | + |               |               | unknown protein                                                              |
| 119972 | + | + | + | + | + | + |               |               | unknown protein                                                              |
| 119974 |   |   |   |   |   |   |               |               | zinc-binding dehydrogenase. putative                                         |



|        |   |   |   |   |   |   |               |               |                                                                                           |
|--------|---|---|---|---|---|---|---------------|---------------|-------------------------------------------------------------------------------------------|
| 119975 | + | + | + | + | + | + |               |               | SSCRP                                                                                     |
| 119980 | + | + | + | + | + | + |               |               | unknown protein                                                                           |
| 119981 | + | + | + | + | + | + |               |               | unknown protein. vacuolar membrane                                                        |
| 119983 | + | + | + | + | + | + |               |               | unknown protein                                                                           |
| 119986 | + | + | + | + | + | + |               |               | Zn2Cys6 transcriptional regulator                                                         |
| 119989 |   |   |   |   |   |   | 1.034<br>down | 2.015 up      | HFB2                                                                                      |
| 119991 | + | + | + | + | + | + |               |               | Unknown protein with a putative zinc finger binding motif                                 |
| 119999 | + |   | + |   |   |   |               |               | Myb-DNA binding domain protein                                                            |
| 120000 |   |   |   |   |   |   |               |               | unknown protein                                                                           |
| 120004 | + | + | + | + | + | + |               |               | ankyrin repeats                                                                           |
| 120008 |   |   |   |   |   |   | 2.084 up      | 2.017 up      | GMC oxidoreductase                                                                        |
| 120012 | + | + | + | + | + | + |               |               | 60S ribosomal protein L24                                                                 |
| 120017 | + | + | + | + |   | + |               |               | oligopeptide transporter                                                                  |
| 120020 | + | + | + | + | + | + |               |               | ribosomal protein L37e from several filamentous fungi and yeasts.                         |
| 120030 |   |   |   |   |   |   |               |               | unique protein                                                                            |
| 120031 |   |   |   |   |   |   | 2.450 up      | 3.009 up      | unknown protein                                                                           |
| 120035 | + | + | + |   |   |   |               |               | unknown protein                                                                           |
| 120044 | + | + | + | + | + | + |               |               | GDP dissociation inhibitor Gdi1                                                           |
| 120051 | + | + | + | + | + | + |               |               | Signal recognition particle. subunit Srp68                                                |
| 120053 | + | + | + | + | + | + |               |               | Hsp70 family protein                                                                      |
| 120057 | + | + | + | + | + | + |               |               | unknown protein                                                                           |
| 120058 | + |   |   |   |   |   |               |               | L-2-hydrounknown proteinglutarate dehydrogenase                                           |
| 120059 | + | + | + |   | + | + |               |               | unknown protein                                                                           |
| 120060 | + | + | + | + | + | + | 1.112<br>down | 2.008<br>down | unknown protein with pleckstrin like domain                                               |
| 120064 | + | + | + | + | + | + |               |               | DEAD box helicase Hel1                                                                    |
| 120067 | + | + | + | + | + | + |               |               | Cue1 domain protein involved in ER-associated protein degradation. Distantly related to m |
| 120070 | + | + | + | + | + | + |               |               | unknown protein                                                                           |
| 120075 | + | + | + | + | + | + |               |               | Ubiquitin-conjugating enzyme (E2)                                                         |

|        |   |   |   |   |   |   |               |               |                                                                                             |
|--------|---|---|---|---|---|---|---------------|---------------|---------------------------------------------------------------------------------------------|
| 120079 | + | + | + | + | + | + | 1.595<br>down | 2.608<br>down | mitochondrial acetoacetyl-CoA thiolase-like protein                                         |
| 120081 | + | + | + | + | + | + |               |               | NMD3 family protein (nonsense-mediated mRNA decay protein)                                  |
| 120086 | + | + | + | + | + | + |               |               | unknown protein                                                                             |
| 120088 | + | + | + | + |   | + | 1.302 up      | 3.685 up      | cytosolic asparaginyl-tRNA synthetase. required for protein synthesis. catalyzes the specif |
| 120106 | + | + | + | + | + | + | 1.999 up      | 2.648 up      | Isopentenyl diphosphate:dimethylallyl diphosphate isomerase                                 |
| 120110 | + | + | + | + | + | + |               |               | unknown protein                                                                             |
| 120113 |   |   |   |   |   |   | 1.444<br>down | 2.062<br>down | unknown protein                                                                             |
| 120114 |   | + | + |   |   |   |               |               | ABC transporter                                                                             |
| 120117 | + | + | + | + | + | + |               |               | C2H2 transcriptional regulator                                                              |
| 120120 |   |   | + |   |   |   |               |               | GCN5-related N-acetyltransferase                                                            |
| 120124 |   |   | + |   |   |   |               |               | unknown protein                                                                             |
| 120125 | + | + | + | + | + | + | 1.277<br>down | 2.433<br>down | unknown protein                                                                             |
| 120127 | + | + | + | + | + | + |               |               | transcriptional regulator GATA-type zinc finger protein ASD-4 (ascospore development pro    |
| 120140 |   |   |   |   |   |   |               |               | metallophosphoesterase domain-containing protein                                            |
| 120142 | + | + | + | + | + | + |               |               | unknown protein                                                                             |
| 120143 | + | + | + | + | + | + |               |               | chaperone DnaJ                                                                              |
| 120144 | + | + | + | + | + | + |               |               | Heat shock protein DnaJ                                                                     |
| 120147 | + | + | + | + | + | + |               |               | deunknown proteinhypusine hydrounknown proteinlase                                          |
| 120150 | + | + | + | + | + | + |               |               | RAS like small GTPase. Ras subfamily                                                        |
| 120152 | + | + | + | + | + | + |               |               | unknown protein                                                                             |
| 120153 | + | + | + | + | + | + |               |               | 26S proteasome regulatory complex subunit Rpn1                                              |
| 120154 | + | + | + | + | + | + |               |               | NADPH cytochrome P450 oxidoreductase                                                        |
| 120156 | + | + | + | + | + | + |               |               | cell morphogenesis protein PAG1                                                             |
| 120160 | + | + | + | + | + | + | 1.428 up      | 2.378 up      | unknown protein                                                                             |
| 120172 | + | + | + | + | + | + | 1.285<br>down | 2.139<br>down | flavodoxin and radical SAM domain protein                                                   |
| 120173 | + | + | + | + | + | + |               |               | Protein import receptor MAS20                                                               |
| 120176 | + | + | + | + | + | + |               |               | unknown protein                                                                             |

|        |   |   |   |   |   |   |               |               |                                                                                               |
|--------|---|---|---|---|---|---|---------------|---------------|-----------------------------------------------------------------------------------------------|
| 120184 | + | + | + | + | + | + |               |               | v-SNARE Ykt6; trafficking to and within Golgi. endocytic trafficking to vacuole. vacuolar fus |
| 120189 | + | + | + | + |   | + |               |               | HFBs                                                                                          |
| 120193 |   |   |   |   |   |   |               |               | unknown protein                                                                               |
| 120195 | + | + | + |   |   |   |               |               | unknown protein                                                                               |
| 120198 | + | + | + | + | + | + | 1.323<br>down | 2.604<br>down | glycosyl transferase. family 35. glycogen phosphorylase 1                                     |
| 120206 | + | + | + | + | + | + |               |               | unknown protein                                                                               |
| 120215 |   | + |   |   |   |   |               |               | unknown protein                                                                               |
| 120219 | + | + | + | + | + | + |               |               | Chorismate_mutChorismate mutase aligned                                                       |
| 120223 | + | + | + | + | + | + |               |               | unknown protein                                                                               |
| 120224 |   |   |   |   |   |   |               |               | C2H2 transcriptional regulator                                                                |
| 120228 |   |   |   |   |   |   |               |               | Zn2Cys6 transcriptional regulator                                                             |
| 120229 |   |   |   |   |   |   | 4.392<br>down | 67.461 up     | GH10 endo-β-1.4-xylanase XYN3                                                                 |
| 120231 |   |   |   |   |   |   |               |               | NACHT domain WD40 repeat-containing protein                                                   |
| 120235 | + | + | + | + | + | + |               |               | Elongation factor 2                                                                           |
| 120236 | + | + | + | + | + | + |               |               | unknown protein                                                                               |
| 120238 | + | + | + | + | + | + |               |               | GPCR. related to NCU07701 (Neurospora)                                                        |
| 120248 |   |   |   |   |   |   | 2.296<br>down | 2.051<br>down | unknown protein                                                                               |
| 120257 | + | + | + |   |   |   |               |               | unknown protein                                                                               |
| 120260 | + | + | + | + | + | + | 1.219 up      | 2.267 up      | ribosomal protein L24e. putative                                                              |
| 120267 | + | + | + |   |   |   |               |               | ribose-5-phosphate isomerase                                                                  |
| 120272 | + | + | + | + | + | + | 1.138<br>down | 2.083<br>down | 64 kDa mitochondrial NADH dehydrogenase. putative                                             |
| 120276 | + | + | + | + | + | + |               |               | unknown protein                                                                               |
| 120288 | + | + | + |   |   |   |               |               | short chain dehydrogenase/reductase                                                           |
| 120290 | + | + | + | + | + | + |               |               | thiamine pyrophosphokinase                                                                    |
| 120294 | + | + | + | + | + | + | 1.606 up      | 2.216 up      | unknown protein                                                                               |
| 120300 | + | + | + | + | + | + |               |               | Electron transfer flavoprotein. alpha subunit                                                 |

|        |   |   |   |   |   |   |                 |               |                                                     |
|--------|---|---|---|---|---|---|-----------------|---------------|-----------------------------------------------------|
| 120311 |   |   |   |   |   |   | 3.486<br>down   | 4.803 up      | unique protein                                      |
| 120312 |   |   |   |   |   |   | 17.338<br>down  | 15.462 up     | GH5 endo- $\beta$ -1.4-glucanase EGL2/CEL5a         |
| 120313 |   |   |   |   |   |   |                 |               | unknown protein                                     |
| 120318 |   |   |   |   |   |   |                 |               | unknown protein                                     |
| 120320 |   |   |   |   |   |   |                 |               | unknown protein                                     |
| 120326 |   |   |   |   |   |   | 1.472<br>down   | 4.129<br>down | unknown protein                                     |
| 120332 | + | + | + | + | + | + |                 |               | unknown protein                                     |
| 120337 | + | + | + | + | + | + |                 |               | kinetochore protein NUF2                            |
| 120339 |   |   |   |   |   |   |                 |               | Histone acetyltransferase (MYST family)             |
| 120351 | + | + | + | + | + | + | 1.691 up        | 2.020 up      | unknown protein                                     |
| 120354 | + | + | + | + | + | + |                 |               | unknown protein                                     |
| 120357 |   |   |   |   |   |   |                 |               | Zinc-binding oxidoreductase                         |
| 120359 |   |   |   |   |   |   |                 |               | unknown protein                                     |
| 120362 |   |   |   |   |   |   |                 |               | unique protein                                      |
| 120363 |   |   |   |   |   |   | 1.151 up        | 2.172<br>down | C2H2 transcriptional regulator                      |
| 120365 |   |   |   |   |   |   | 2.044<br>down   | 2.434<br>down | BZIP transcriptional regulator                      |
| 120370 |   |   |   |   |   |   | 1.519 up        | 2.024 up      | unknown protein                                     |
| 120371 |   |   |   |   |   |   | 161.771<br>down | 8.375<br>down | Catalase                                            |
| 120376 | + | + | + |   |   | + |                 |               | Proteasome component Ecm29                          |
| 120378 | + | + | + | + | + | + |                 |               | isocitrate dehydrogenase subunit IDH1. NAD-specific |
| 120381 |   |   |   |   |   |   | 2.719 up        | 6.564<br>down | unique protein                                      |
| 120384 | + | + | + | + | + | + |                 |               | unknown protein                                     |
| 120385 | + | + | + | + | + | + |                 |               | unknown protein                                     |
| 120388 | + | + | + | + | + | + |                 |               | TRAPP complex component Trs130                      |

|        |   |   |   |   |   |   |            |            |                                                                          |
|--------|---|---|---|---|---|---|------------|------------|--------------------------------------------------------------------------|
| 120391 | + | + | + | + | + | + |            |            | unknown protein                                                          |
| 120394 | + | + | + | + | + | + |            |            | T-complex protein 1                                                      |
| 120402 | + | + | + | + | + | + |            |            | tubulin-tyrosine ligase                                                  |
| 120404 | + | + |   |   |   | + |            |            | SIR2 protein                                                             |
| 120407 | + | + | + | + | + | + |            |            | unknown protein                                                          |
| 120411 | + | + | + | + | + | + |            |            | unknown protein                                                          |
| 120412 | + | + | + | + | + | + |            |            | ARF-GAP effector                                                         |
| 120414 | + | + | + | + | + | + |            |            | unknown protein                                                          |
| 120415 |   |   |   |   |   |   | 4.687 up   | 2.154 up   | unknown protein                                                          |
| 120416 | + | + | + | + | + | + |            |            | unknown protein                                                          |
| 120418 | + | + | + | + | + | + |            |            | unknown protein                                                          |
| 120420 | + | + | + | + | + | + |            |            | unknown protein                                                          |
| 120424 |   |   |   |   |   |   |            |            | Glyoxalase I                                                             |
| 120428 | + | + | + | + | + | + |            |            | C2H2 transcriptional regulator                                           |
| 120430 | + | + | + | + |   | + |            |            | Zn2Cys6 transcriptional regulator                                        |
| 120432 | + | + | + | + | + | + |            |            | unknown protein                                                          |
| 120447 | + | + | + | + | + | + |            |            | Rad24. involved inReplication checkpoint control                         |
| 120451 | + | + | + | + | + | + | 1.872 up   | 3.275 up   | unknown protein                                                          |
| 120453 | + | + | + |   |   |   |            |            | SSCRP                                                                    |
| 120458 | + | + | + | + | + | + |            |            | unknown protein                                                          |
| 120473 | + | + | + | + | + | + | 1.170 up   | 2.137 up   | Dihydrolipoamide transacylase (alpha-keto acid dehydrogenase E2 subunit) |
| 120475 | + | + | + | + | + | + | 1.685 down | 2.386 down | C2H2 transcriptional regulator                                           |
| 120479 | + | + | + |   |   |   |            |            | SSCRP                                                                    |
| 120482 | + | + | + | + | + | + |            |            | unknown protein                                                          |
| 120484 | + | + | + | + | + | + |            |            | Unknown coiled-coil protein                                              |
| 120485 | + | + | + | + | + | + |            |            | unknown protein                                                          |
| 120486 | + | + | + | + | + | + | 1.624 up   | 4.346 up   | auxiliary protein of DNA polymerase delta                                |
| 120489 |   |   |   |   |   |   | 2.331 down | 2.972 down | unknown protein                                                          |

|        |   |   |   |   |   |   |               |               |                                                                                    |
|--------|---|---|---|---|---|---|---------------|---------------|------------------------------------------------------------------------------------|
| 120498 |   |   |   |   |   |   |               |               | Phosphotyrosyl phosphatase activator. PTPA                                         |
| 120503 |   | + | + | + | + |   |               |               | unique protein                                                                     |
| 120504 |   |   | + | + |   |   | 2.557<br>down | 9.472 up      | unique protein                                                                     |
| 120510 |   | + | + | + | + | + |               |               | unknown protein                                                                    |
| 120516 |   | + | + | + | + | + |               |               | unknown protein                                                                    |
| 120524 |   | + | + | + |   |   |               |               | unknown protein                                                                    |
| 120529 |   | + | + | + | + | + |               |               | unknown protein                                                                    |
| 120534 | + | + | + | + | + | + |               |               | Ca2+-binding actin-bundling protein (fimbrin/plastin). EF-Hand protein superfamily |
| 120535 | + | + | + | + | + | + |               |               | unknown protein                                                                    |
| 120539 |   | + | + | + | + | + |               |               | Adenylate kinase                                                                   |
| 120540 |   | + | + | + | + | + |               |               | Ribosomal protein S23                                                              |
| 120545 |   | + | + | + | + | + |               |               | protein phosphatase 2A regulatory B subunit                                        |
| 120556 |   |   |   |   |   |   |               |               | Mitochondrial substrate carrier                                                    |
| 120557 |   | + | + | + | + | + |               |               | unknown protein                                                                    |
| 120558 |   |   |   |   |   |   |               |               | unknown protein                                                                    |
| 120566 |   | + | + | + | + |   |               |               | unknown protein                                                                    |
| 120568 |   | + | + | + | + | + |               |               | enolase                                                                            |
| 120570 |   | + | + | + | + | + |               |               | tRNA splicing endonuclease SEN15 of yeast.                                         |
| 120571 |   | + | + | + | + | + | 1.596 up      | 5.082 up      | pre-rRNA-processing protein PNO1                                                   |
| 120577 |   | + | + | + | + | + |               |               | unique protein                                                                     |
| 120579 |   | + | + | + | + | + |               |               | Unknown protein                                                                    |
| 120583 |   | + | + | + | + | + |               |               | unknown protein                                                                    |
| 120597 |   | + | + | + | + | + | 2.887<br>down | 8.540<br>down | C2H2 transcriptional regulator                                                     |
| 120600 |   | + | + | + | + | + |               |               | unknown protein                                                                    |
| 120605 |   | + | + | + | + | + |               |               | protein kinase Rim15. response regulator receiver p                                |
| 120607 |   | + | + | + | + | + |               |               | eukaryotic translation initiation factor 3. subunit 7.                             |
| 120609 |   |   |   |   |   |   |               |               | unknown protein                                                                    |
| 120610 |   | + | + | + | + | + |               |               | Unknown protein                                                                    |

|        |   |   |   |   |   |   |   |               |               |                                                                                           |
|--------|---|---|---|---|---|---|---|---------------|---------------|-------------------------------------------------------------------------------------------|
| 120618 |   | + | + | + | + | + | + |               |               | mediator of RNA polymerase II transcription subunit 14. putative                          |
| 120621 |   | + | + | + | + | + | + |               |               | ribosomal protein L37 of the large (60S) ribosomal subunit. Belongs to the same family as |
| 120623 |   | + | + | + | + | + | + | 2.154<br>down | 2.316<br>down | unknown protein                                                                           |
| 120627 |   | + | + | + | + | + | + |               |               | Ca-ATPases                                                                                |
| 120635 |   | + | + | + | + | + | + |               |               | transketolase-like protein                                                                |
| 120646 |   | + | + | + | + | + | + |               |               | Spermine/spermidine synthase                                                              |
| 120648 |   | + | + | + | + | + | + |               |               | PhyHPhytanoyl-CoA dioxygenase (PhyH)                                                      |
| 120650 | + | + | + | + | + | + | + |               |               | 20S proteasome alpha subunit Scl1                                                         |
| 120654 |   | + | + | + | + | + | + |               |               | unknown protein                                                                           |
| 120661 |   | + | + | + | + | + | + |               |               | aps1. subunit of the adaptor protein complex AP-1                                         |
| 120675 |   | + | + | + | + | + | + |               |               | ArgE                                                                                      |
| 120676 |   | + | + | + | + | + | + |               |               | GH37 $\alpha$ . $\alpha$ -trehalase                                                       |
| 120688 |   | + | + | + | + | + | + | 1.495 up      | 2.635 up      | unique protein                                                                            |
| 120689 |   |   |   |   |   |   |   |               |               | unknown protein                                                                           |
| 120696 |   |   |   |   |   |   |   |               |               | alcohol dehydrogenase                                                                     |
| 120697 |   |   |   |   |   |   |   | 3.428 up      | 4.518 up      | SSCRP                                                                                     |
| 120698 |   | + | + | + | + |   | + |               |               | C2H2 transcriptional regulator                                                            |
| 120702 |   |   |   |   |   |   |   | 1.202 up      | 4.743 up      | unknown protein                                                                           |
| 120705 |   |   |   |   |   |   |   |               |               | unknown protein                                                                           |
| 120712 |   |   |   |   |   |   |   |               |               | 3-oxoacyl-(acyl carrier protein) synthase                                                 |
| 120715 |   |   |   |   |   |   |   | 2.085<br>down | 2.028<br>down | Zn2Cys6 transcriptional regulator                                                         |
| 120722 |   | + | + | + | + | + | + |               |               | Serine/threonine protein phosphatases                                                     |
| 120730 |   | + | + | + | + | + | + |               |               | unknown protein                                                                           |
| 120733 |   | + | + | + | + | + | + | 1.470 up      | 3.649 up      | mitochondrial import inner membrane translocase subunit TIM13 / Zn-finger. Tim10/DDP      |
| 120737 |   | + | + | + | + | + | + |               |               | histone acetyltransferase type B catalytic subunit                                        |
| 120747 |   |   |   |   |   |   |   |               |               | unknown protein                                                                           |
| 120749 |   | + | + | + |   | + |   | 2.428<br>down | 2.475 up      | GH1 $\beta$ -glucosidase BGL2/CEL1a                                                       |

|        |   |   |   |   |   |   |               |               |                                                                                       |
|--------|---|---|---|---|---|---|---------------|---------------|---------------------------------------------------------------------------------------|
| 120751 | + | + | + | + | + | + | 2.015<br>down | 2.226<br>down | unknown protein                                                                       |
| 120752 |   |   |   |   |   |   | 1.396<br>down | 3.362<br>down | K+ transporter Trk1                                                                   |
| 120753 | + | + | + | + | + | + |               |               | DNA repair helicase RAD25                                                             |
| 120765 |   |   |   |   |   |   |               |               | enoyl-CoA hydratase/isomerase                                                         |
| 120767 | + | + | + | + | + | + |               |               | unknown protein                                                                       |
| 120774 | + | + | + |   |   |   |               |               | unknown protein                                                                       |
| 120779 | + | + | + | + | + | + |               |               | unknown protein                                                                       |
| 120781 | + | + | + | + | + | + |               |               | 40s ribosomal protein S6                                                              |
| 120784 | + | + | + | + | + | + | 1.608<br>down | 2.766<br>down | cell wall mannoprotein                                                                |
| 120786 | + | + | + | + | + | + |               |               | HMGL-like                                                                             |
| 120789 | + | + | + | + | + | + |               |               | Tubulin alpha chain 2                                                                 |
| 120791 | + | + | + | + | + | + | 1.410 up      | 2.105 up      | unknown protein                                                                       |
| 120794 | + | + | + | + | + | + |               |               | unknown protein                                                                       |
| 120799 | + | + | + | + | + | + |               |               | unknown protein                                                                       |
| 120801 | + | + | + | + | + | + |               |               | RNA recognition domain protein                                                        |
| 120803 |   | + | + |   |   |   |               |               | unknown protein                                                                       |
| 120805 | + | + | + | + | + | + |               |               | unknown protein                                                                       |
| 120806 | + | + | + | + | + | + |               |               | protein kinase                                                                        |
| 120807 | + | + | + | + | + | + |               |               | GT66. STT3 subunit of ER oligosaccharyltransferase                                    |
| 120813 |   | + |   |   |   |   |               |               | CAP-Gly domain aligned                                                                |
| 120819 | + | + | + | + | + | + |               |               | unknown protein                                                                       |
| 120821 | + | + | + | + | + | + |               |               | phytase                                                                               |
| 120823 |   | + | + |   |   |   | 1.409 up      | 2.117 up      | cell wall mannoprotein                                                                |
| 120826 | + | + | + | + |   |   |               |               | unknown protein                                                                       |
| 120828 | + | + | + | + | + | + | 1.240 up      | 2.442 up      | unknown protein                                                                       |
| 120830 | + | + | + | + | + | + |               |               | Tubulin alpha chain 1                                                                 |
| 120833 | + | + | + | + | + | + |               |               | 40s ribosomal protein S15 based on homology to corresponding proteins in other fungi. |



|        |   |   |   |   |   |   |               |               |                                                                                                |
|--------|---|---|---|---|---|---|---------------|---------------|------------------------------------------------------------------------------------------------|
| 120836 | + | + | + | + | + | + |               |               | unknown protein                                                                                |
| 120837 | + | + | + |   | + |   |               |               | unknown protein. 1 TM domain                                                                   |
| 120851 |   |   |   |   |   |   |               |               | HET domain protein. related to <i>N. crassa</i> pin-c3                                         |
| 120860 |   |   |   |   |   |   |               |               | germinal center kinase. related to <i>S. cerevisiae</i> Kic1                                   |
| 120864 | + | + | + | + | + | + |               |               | DIP2. encoding a nucleolar protein. specifically associated with the U3 snoRNA of the SSU      |
| 120868 | + | + | + | + | + | + |               |               | Ribosomal protein S13 (S15 family) based on homology to the corresponding protein in <i>G.</i> |
| 120872 |   |   |   |   |   |   | 2.434<br>down | 3.420<br>down | GCN5 N-acetyltransferase                                                                       |
| 120873 |   |   |   |   |   |   | 1.069<br>down | 11.000 up     | GH71 $\alpha$ -1 3-glucanase                                                                   |
| 120877 |   |   |   |   |   |   |               |               | Zn-dependent $\beta$ -lactamase                                                                |
| 120879 |   |   |   |   |   |   |               |               | unique protein                                                                                 |
| 120884 |   |   |   |   |   |   |               |               | Formyl_trans_NFormyl transferase                                                               |
| 120889 |   |   |   |   |   |   | 1.271 up      | 2.110<br>down | cytochrome P450. putative                                                                      |
| 120892 | + | + | + | + | + | + |               |               | unknown protein                                                                                |
| 120893 | + | + | + | + | + | + |               |               | ATPase. AAA family protein. putative                                                           |
| 120897 | + | + | + | + | + | + |               |               | BRCT domain protein Rad4/Cut5 of <i>Schizosaccharomyces pombe</i> . a protein involved in DN   |
| 120899 | + | + | + | + | + | + |               |               | unknown protein                                                                                |
| 120908 | + | + | + | + | + | + |               |               | myb transcriptional regulator                                                                  |
| 120911 | + | + | + | + | + | + | 3.158<br>down | 8.588<br>down | short chain dehydrogenase/reductase                                                            |
| 120912 |   | + |   |   |   |   |               |               | unknown protein                                                                                |
| 120915 | + | + | + | + | + | + |               |               | unknown protein                                                                                |
| 120917 | + | + | + | + | + | + |               |               | unknown protein                                                                                |
| 120918 | + | + | + | + | + | + |               |               | unknown protein                                                                                |
| 120922 | + | + | + | + | + | + |               |               | thioredoxin                                                                                    |
| 120923 |   |   |   |   |   |   |               |               | GT32 $\alpha$ -glycosyltransferase                                                             |
| 120926 |   |   |   |   |   |   | 4.050<br>down | 2.468 up      | unique protein                                                                                 |
| 120927 |   |   |   |   |   |   | 1.963 up      | 6.440 up      | ankyrin containing protein                                                                     |

|        |   |   |   |   |   |   |                |               |                                                             |
|--------|---|---|---|---|---|---|----------------|---------------|-------------------------------------------------------------|
| 120928 |   |   |   |   |   |   |                |               | unknown protein                                             |
| 120929 | + | + | + | + | + | + |                |               | unknown protein                                             |
| 120931 | + | + | + | + | + | + | 7.346 up       | 12.502 up     | unknown protein                                             |
| 120937 | + | + | + | + | + | + |                |               | unknown protein                                             |
| 120940 | + | + | + | + | + | + |                |               | Vacuolar protein sorting-associated protein Vps2            |
| 120943 | + | + | + | + | + | + |                |               | NAD-dependent glutamate dehydrogenase                       |
| 120952 | + | + | + | + | + | + |                |               | Glutamine Phosphoribosylpyrophosphate amidotransferase PurF |
| 120953 |   |   |   |   |   |   |                |               | unknown secreted protein                                    |
| 120961 |   |   | + |   |   |   | 40.524<br>down | 21.244 up     | GH61 polysaccharide monooxygenase CEL61b                    |
| 120968 |   |   |   |   |   |   | 2.928<br>down  | 13.631 up     | Copper chaperone for superoxide dismutase                   |
| 120969 | + | + | + | + | + | + | 1.548 up       | 2.148 up      | NADPH oxidase regulator NoxR                                |
| 120975 |   |   |   |   |   |   |                |               | unknown protein                                             |
| 120978 | + | + | + | + | + | + | 1.121 up       | 2.011 up      | large ribosomal subunit (protein L34e).                     |
| 120980 |   |   |   |   |   |   |                |               | unknown protein                                             |
| 120981 | + | + | + | + | + | + | 1.324<br>down  | 3.117<br>down | magnesium and cobalt transporter CorA                       |
| 120983 | + | + | + | + | + | + |                |               | uracil phosphoribosyl transferase                           |
| 120985 | + | + | + |   |   |   |                |               | unknown protein                                             |
| 120988 |   |   |   |   |   |   |                |               | Zn2Cys6 transcriptional regulator                           |
| 120993 | + |   |   |   |   |   | 1.306<br>down  | 3.637 up      | unknown protein                                             |
| 120994 | + | + | + | + | + | + |                |               | T-complex protein 1                                         |
| 120998 | + | + | + | + | + | + |                |               | Carboxypeptidase Y homolog                                  |
| 121000 |   |   |   |   |   |   |                |               | Tryptophanyl-tRNA synthetase. class I of Neurospora crassa  |
| 121003 | + | + | + | + | + | + |                |               | Ribosomal protein S18. S13 family                           |
| 121004 | + | + | + | + | + | + |                |               | unknown protein                                             |
| 121009 | + | + | + | + | + | + |                |               | 20S proteasome beta-type subunit Pre2                       |
| 121011 | + | + | + | + | + | + |                |               | Unknown protein with Zn-finger. FYVE type domain.           |
| 121014 |   | + |   | + |   |   |                |               | unknown protein                                             |

|        |   |   |   |   |   |   |            |            |                                                        |
|--------|---|---|---|---|---|---|------------|------------|--------------------------------------------------------|
| 121019 | + | + | + | + | + | + |            |            | Succinate dehydrogenase                                |
| 121022 | + | + | + | + | + | + |            |            | unknown protein                                        |
| 121023 | + | + | + | + | + | + |            |            | elf2 gamma subunit.                                    |
| 121028 | + | + | + | + | + | + |            |            | 14-3-3 protein                                         |
| 121031 | + | + | + | + | + | + |            |            | valyl-tRNA synthetase. mitochondrial precursor.        |
| 121033 | + | + | + | + |   | + |            |            | unique protein                                         |
| 121041 |   |   |   |   |   |   |            |            | unknown protein                                        |
| 121042 |   |   |   |   |   |   | 2.457 up   | 7.562 up   | unknown protein                                        |
| 121048 | + | + | + | + | + | + |            |            | ubiquitin conjugating enzyme                           |
| 121051 | + | + | + | + | + | + |            |            | histidyl-tRNA synthetase. class IIa. from other fungi. |
| 121056 | + | + | + | + | + | + |            |            | unknown protein                                        |
| 121058 |   |   |   |   |   |   | 1.119 up   | 2.244 up   | unknown protein                                        |
| 121061 | + | + | + | + | + | + |            |            | checkpoint kinase 2-like protein                       |
| 121065 |   |   |   |   |   |   |            |            | unknown protein                                        |
| 121068 | + | + | + | + | + | + |            |            | Phosphomannomutase (SEC53)                             |
| 121071 | + | + | + | + | + | + |            |            | unknown protein                                        |
| 121073 | + | + | + | + | + | + |            |            | unknown protein                                        |
| 121074 | + | + | + |   | + |   |            |            | homeobox transcriptional regulator                     |
| 121080 | + | + | + | + | + | + |            |            | Heteromeric CCAAT factors                              |
| 121082 | + | + | + | + | + | + |            |            | unique protein                                         |
| 121087 | + | + | + | + | + | + |            |            | unknown protein                                        |
| 121088 | + | + | + | + | + | + |            |            | unknown protein. secreted 1 TM                         |
| 121089 | + | + | + | + | + | + |            |            | unknown protein. only present in ascomycota and cow    |
| 121091 | + | + | + | + | + | + |            |            | unknown protein                                        |
| 121095 | + | + | + | + | + | + | 1.186 down | 2.528 down | cell cycle control protein (Cwf19). putative           |
| 121098 | + | + | + | + | + | + |            |            | Multicopper oxidases                                   |
| 121107 | + |   | + | + |   | + | 1.213 up   | 2.152 down | Zn2Cys6 transcriptional regulator                      |
| 121111 |   |   |   |   |   |   |            |            | unknown protein                                        |

|        |   |   |   |   |   |   |             |            |                                                                                   |
|--------|---|---|---|---|---|---|-------------|------------|-----------------------------------------------------------------------------------|
| 121121 |   |   |   |   |   |   | 1.399 up    | 2.196 up   | Zn2Cys6 transcriptional regulator                                                 |
| 121125 | + | + | + | + | + | + |             |            | unknown protein                                                                   |
| 121126 |   |   |   |   |   |   |             |            | unknown protein                                                                   |
| 121127 |   |   |   |   |   |   | 17.003 down | 4.756 up   | GH3 $\beta$ -xylosidase BXL1                                                      |
| 121130 |   |   |   |   |   |   | 1.021 up    | 2.166 down | Zn2Cys6 transcriptional regulator                                                 |
| 121133 | + | + | + | + |   | + |             |            | Aspartic peptidaseA1                                                              |
| 121135 |   |   |   |   |   |   | 2.155 up    | 2.695 up   | SSCRP                                                                             |
| 121136 |   |   |   |   |   |   |             |            | unique protein                                                                    |
| 121138 |   |   |   |   |   |   |             |            | Zn2Cys6 transcriptional regulator                                                 |
| 121139 |   |   |   |   |   |   |             |            | Amino acid transporters                                                           |
| 121143 | + | + | + | + | + | + |             |            | Phenylalanyl-tRNA synthetase                                                      |
| 121146 |   |   |   |   |   |   |             |            | unknown protein                                                                   |
| 121148 | + | + | + | + | + | + |             |            | C2H2 transcriptional regulator                                                    |
| 121154 | + | + | + | + | + | + |             |            | Amidase                                                                           |
| 121156 |   | + |   |   |   |   |             |            | Copper amine oxidase                                                              |
| 121158 | + | + | + | + | + | + |             |            | Serine/Threonine protein kinase                                                   |
| 121163 | + |   |   | + |   | + |             |            | unknown protein                                                                   |
| 121164 | + | + | + |   |   |   |             |            | Zn2Cys6 transcriptional regulator                                                 |
| 121166 | + | + | + | + | + | + |             |            | SAM-dependent methyltransferases                                                  |
| 121169 | + | + | + | + | + | + |             |            | Vacuolar protein sorting-associated protein Vps46                                 |
| 121171 | + | + | + | + | + | + | 2.084 up    | 2.196 up   | replication fork protection component Swi3                                        |
| 121172 | + | + | + | + | + | + |             |            | unknown protein. 2 TM. related to <i>N. crassa</i> NADH-ubiquinone oxidoreductase |
| 121175 | + | + | + | + | + | + |             |            | unknown protein                                                                   |
| 121177 |   |   |   |   |   |   |             |            | SSCRP                                                                             |
| 121178 | + | + | + | + | + | + |             |            | unknown protein                                                                   |
| 121185 |   |   |   |   |   |   |             |            | unknown protein                                                                   |
| 121187 | + | + | + | + | + | + | 2.968 down  | 2.772 down | unknown protein                                                                   |

|        |   |   |   |   |   |   |               |               |                                                    |
|--------|---|---|---|---|---|---|---------------|---------------|----------------------------------------------------|
| 121189 |   |   |   |   |   |   |               |               | unknown protein                                    |
| 121191 | + | + | + | + | + | + |               |               | Acetyltransf_Acetyltransferase (GNAT) family       |
| 121196 | + | + | + | + | + | + |               |               | SWI-SNF chromatin-remodeling complex protein       |
| 121203 | + | + | + | + | + | + | 1.527<br>down | 2.032<br>down | unknown protein                                    |
| 121206 | + | + | + | + | + | + |               |               | unknown protein                                    |
| 121214 |   |   |   |   |   |   |               |               | unknown protein                                    |
| 121219 | + | + | + | + | + | + |               |               | ribosomal protein L11                              |
| 121223 | + | + | + | + | + | + |               |               | Secretion related small GTPase Sec4                |
| 121226 | + |   | + |   |   |   | 2.555 up      | 2.130 up      | unknown protein                                    |
| 121227 | + | + | + | + | + | + |               |               | GT2 dolichyl-phosphate β-glucosyltransferase       |
| 121230 | + | + | + | + | + | + | 1.100 up      | 2.390 up      | unique protein                                     |
| 121232 | + |   | + |   |   |   |               |               | unknown protein                                    |
| 121238 | + | + | + | + | + | + |               |               | ubiquitin carboxyl-terminal hydrolase              |
| 121239 | + | + |   |   |   |   |               |               | unknown protein                                    |
| 121240 | + |   |   |   |   |   |               |               | phosphoglycerate mutase                            |
| 121247 | + | + | + | + | + | + |               |               | unknown protein                                    |
| 121248 | + | + | + | + | + | + |               |               | ATP12 chaperone . putative                         |
| 121251 |   |   | + |   |   |   |               |               | cell wall protein (Metarhizium adhesion Mad1 ?)    |
| 121252 | + | + | + | + | + | + |               |               | Zn2Cys6 transcriptional regulator                  |
| 121255 | + | + | + | + | + | + |               |               | 2-methylcitrate dehydratase-like protein           |
| 121262 | + | + | + | + | + | + |               |               | unknown protein                                    |
| 121275 | + | + | + | + | + | + |               |               | cytochrome c oxidase subunit VIa                   |
| 121276 | + | + | + | + | + | + |               |               | sla2. adaptor protein that links actin to clathrin |
| 121278 | + | + | + | + | + | + |               |               | unknown protein                                    |
| 121284 | + | + | + | + | + | + |               |               | unknown protein                                    |
| 121285 | + | + | + | + | + | + |               |               | unique protein. 1 TM                               |
| 121289 | + | + | + | + | + | + |               |               | unknown protein                                    |
| 121292 | + | + | + | + | + | + |               |               | Emp24/gp25L/p24 family protein Erp3                |

|        |   |   |   |   |   |   |               |               |                                                                                                                            |
|--------|---|---|---|---|---|---|---------------|---------------|----------------------------------------------------------------------------------------------------------------------------|
| 121294 | + | + |   |   |   |   | 1.670<br>down | 2.337<br>down | glucan endo-1.3(4)- $\beta$ -D-glucosidase                                                                                 |
| 121295 | + | + | + | + | + | + | 1.210<br>down | 2.214<br>down | Dolichol kinase Sec59                                                                                                      |
| 121297 | + | + | + | + | + | + |               |               | unknown protein                                                                                                            |
| 121298 | + | + | + | + | + | + |               |               | formate dehydrogenase                                                                                                      |
| 121304 | + | + | + | + | + | + |               |               | unknown protein                                                                                                            |
| 121306 | + | + | + |   | + |   |               |               | Aspartyl protease                                                                                                          |
| 121308 | + | + | + |   |   |   | 1.666 up      | 2.084 up      | PutA delta-1-pyrroline-5-carboxylate dehydrogenase                                                                         |
| 121310 | + | + | + | + | + | + |               |               | Zn2Cys6 transcriptional regulator                                                                                          |
| 121312 | + | + | + | + | + | + |               |               | SSCRP                                                                                                                      |
| 121315 |   |   |   |   |   |   | 1.335 up      | 3.384 up      | unknown protein                                                                                                            |
| 121319 | + | + | + | + | + | + |               |               | unknown protein                                                                                                            |
| 121325 |   |   |   |   |   |   |               |               | unknown protein                                                                                                            |
| 121336 |   |   |   |   |   |   |               |               | unique protein                                                                                                             |
| 121337 |   |   |   |   |   |   | 1.552<br>down | 2.022 up      | unknown protein                                                                                                            |
| 121338 |   | + |   |   |   | + |               |               | unknown protein                                                                                                            |
| 121343 | + | + | + | + | + | + |               |               | 20S proteasome alpha-type subunit Pre5                                                                                     |
| 121345 |   |   |   |   |   |   |               |               | SerC Phosphoserine aminotransferase                                                                                        |
| 121349 | + | + | + | + | + | + |               |               | GTPase activating protein for Rab family members of Ras smallGTPases. related to S. cerevisiae                             |
| 121350 |   |   |   |   |   |   |               |               | unknown protein                                                                                                            |
| 121351 | + | + | + | + | + | + |               |               | GH31 Glucosidase II alpha subunit GLS2                                                                                     |
| 121355 |   |   |   |   |   |   |               |               | GH18 chitinase CHI18-rel2                                                                                                  |
| 121359 | + | + | + | + | + | + |               |               | Ubiquitin associated protein probably involved in cell signalling via protein kinases and the ubiquitin-proteasome pathway |
| 121362 | + | + | + | + | + | + |               |               | unknown protein                                                                                                            |
| 121363 | + | + | + | + | + | + |               |               | RNA export mediator Gle1. putative                                                                                         |
| 121367 | + | + | + | + | + | + |               |               | vacuolar ATP synthase catalytic subunit A                                                                                  |
| 121372 | + | + | + | + | + | + | 1.084 up      | 2.660 up      | 60S ribosomal protein L38 by homology with corresponding proteins in other fungi and yeasts                                |
| 121374 | + | + | + | + | + | + |               |               | mevalonate kinase; ergosterol biosynthetic pathway                                                                         |

|        |   |   |   |   |   |   |               |                |                                                                                                 |
|--------|---|---|---|---|---|---|---------------|----------------|-------------------------------------------------------------------------------------------------|
| 121381 | + | + | + | + | + | + |               |                | Rad16                                                                                           |
| 121396 |   |   |   |   |   |   |               |                | unique protein                                                                                  |
| 121397 | + | + | + | + | + | + | 1.036<br>down | 2.050 up       | Sec61alpha subunit                                                                              |
| 121399 | + | + | + | + | + | + |               |                | unknown protein                                                                                 |
| 121405 |   |   |   |   |   |   | 4.002<br>down | 10.879<br>down | 4-aminobutyrate aminotransferase                                                                |
| 121408 | + | + | + | + | + | + |               |                | ribosomal protein L27 domain. Shows amino acid sequence similarity to <i>S. cerevisiae</i> mito |
| 121411 | + | + | + | + | + | + |               |                | unknown protein                                                                                 |
| 121412 | + | + | + | + | + | + | 4.497 up      | 2.811 up       | Zn2Cys6 transcriptional regulator                                                               |
| 121415 |   |   |   |   |   |   | 11.737 up     | 29.400 up      | Zn2Cys6 transcriptional regulator                                                               |
| 121416 |   |   |   |   |   |   |               |                | unknown protein                                                                                 |
| 121417 |   |   |   |   |   |   | 1.340<br>down | 2.317 up       | unknown protein with fasciclin domain                                                           |
| 121418 |   |   |   |   |   |   |               |                | lipase G-D-S-L                                                                                  |
| 121420 | + | + | + | + | + | + |               |                | glutamyl-tRNA synthetase. class Ic.                                                             |
| 121427 |   |   |   |   |   |   |               |                | unknown protein                                                                                 |
| 121431 | + | + | + | + | + | + |               |                | unknown protein                                                                                 |
| 121436 | + | + | + | + | + | + |               |                | Mitochondrial inner membrane insertase                                                          |
| 121439 | + | + | + |   |   |   | 3.040<br>down | 2.622<br>down  | unknown protein                                                                                 |
| 121441 | + | + |   |   |   | + | 1.208 up      | 3.323<br>down  | carbounknown proteinic acid transporter                                                         |
| 121445 |   |   |   |   |   |   |               |                | unknown protein                                                                                 |
| 121449 | + | + | + | + | + | + |               |                | IGPDImidazoleglycerol-phosphate dehydratase                                                     |
| 121453 | + | + | + | + | + | + |               |                | translation initiation factor eIF2B subunit (Gcd2p).                                            |
| 121464 | + | + | + | + | + | + | 1.181 up      | 3.226 up       | GcvHGlycine cleavage system H protein (lipoate-binding)                                         |
| 121468 | + | + | + | + | + | + |               |                | unknown protein                                                                                 |
| 121469 | + | + | + | + | + | + |               |                | ribosomal protein L4/L1e                                                                        |
| 121471 | + | + | + | + | + | + |               |                | SSCRP                                                                                           |

|        |   |   |   |   |   |   |                |               |                                                                                                           |
|--------|---|---|---|---|---|---|----------------|---------------|-----------------------------------------------------------------------------------------------------------|
| 121474 |   |   |   |   |   |   | 1.420<br>down  | 4.098<br>down | Zn2Cys6 transcriptional regulator                                                                         |
| 121475 | + |   |   |   |   |   |                |               | unique protein                                                                                            |
| 121478 |   |   |   |   |   |   |                |               | short chain dehydrogenase/reductase                                                                       |
| 121482 |   |   |   |   |   |   |                |               | MFS permease                                                                                              |
| 121486 |   |   |   |   |   |   | 12.952<br>down | 7.206<br>down | unknown protein                                                                                           |
| 121491 |   |   |   |   |   |   |                |               | GT4 $\alpha$ . $\alpha$ '-trehalose phosphorylase/synthase                                                |
| 121495 |   |   |   |   |   |   | 1.677<br>down  | 9.463 up      | Vacuolar proteinase B (yscB). a serine protease of the subtilisin family                                  |
| 121498 |   |   |   |   |   |   | 12.234<br>down | 2.704<br>down | Phosphatidylserine decarboxylase                                                                          |
| 121499 |   |   |   |   |   |   |                |               | unknown protein                                                                                           |
| 121500 |   |   |   |   |   |   |                |               | metallophosphoesterase                                                                                    |
| 121504 | + | + | + | + | + | + |                |               | GPI transamidase component GAA1                                                                           |
| 121506 | + | + | + | + | + | + |                |               | mitochondrial substrate carrier. comprises DEAD/DEAH box helicase domain                                  |
| 121516 | + | + | + | + | + | + | 1.279 up       | 2.128 up      | histone H2B                                                                                               |
| 121522 | + | + | + | + | + | + |                |               | histone H2A                                                                                               |
| 121529 | + | + | + | + | + | + |                |               | Mitochondrial carrier protein                                                                             |
| 121533 | + | + | + | + | + | + |                |               | unknown protein                                                                                           |
| 121534 |   |   |   |   |   |   |                |               | pyruvate decarboxylase                                                                                    |
| 121539 | + | + | + | + | + | + |                |               | MAPK1. mitogen activated protein kinase 1 involved in biocontrol activity in <i>H. virens</i>             |
| 121544 |   |   |   |   |   |   |                |               | acetyltransferase                                                                                         |
| 121546 | + | + | + |   |   |   |                |               | acyltransferases that catalyze diacylglycerol esterification; phospholipid:diacylglycerol acyltransferase |
| 121550 | + | + | + | + | + | + |                |               | PssA Phosphatidylserine synthase                                                                          |
| 121553 | + | + | + |   |   |   |                |               | unknown protein                                                                                           |
| 121556 |   |   |   |   |   |   |                |               | unknown protein                                                                                           |
| 121558 |   |   |   |   |   |   |                |               | unknown protein                                                                                           |
| 121559 | + | + | + | + | + | + |                |               | unknown protein                                                                                           |
| 121569 | + | + | + | + | + | + |                |               | Unknown protein                                                                                           |
| 121573 | + | + | + | + | + | + |                |               | DNA primase. small subunit                                                                                |



|        |   |   |   |   |   |   |            |            |                                                                                            |
|--------|---|---|---|---|---|---|------------|------------|--------------------------------------------------------------------------------------------|
| 121579 | + | + | + | + | + | + | 1.519 up   | 2.047 up   | unknown protein                                                                            |
| 121582 | + | + | + | + | + | + |            |            | MRP4 encoding mitochondrial ribosomal protein of the small subunit.                        |
| 121584 | + | + | + | + | + | + |            |            | C2H2 transcriptional regulator                                                             |
| 121588 | + | + | + | + | + | + |            |            | beta-adaptin. apl2. large subunit of the adaptor protein (AP-1) complex of clathrin-coated |
| 121593 | + | + | + | + | + | + |            |            | unknown protein                                                                            |
| 121594 |   |   |   |   |   |   | 5.975 down | 2.831 down | unique protein                                                                             |
| 121597 | + | + | + | + | + | + |            |            | unique protein                                                                             |
| 121602 |   |   | + |   |   |   | 1.168 down | 2.527 down | Zn2Cys6 transcriptional regulator                                                          |
| 121605 |   |   | + |   |   |   |            |            | unknown protein                                                                            |
| 121606 | + | + | + | + | + | + |            |            | unknown protein                                                                            |
| 121608 |   |   |   |   |   |   | 2.331 down | 7.628 down | MFS permease                                                                               |
| 121610 | + | + | + | + | + | + |            |            | TOR kinase                                                                                 |
| 121620 |   |   | + |   |   |   |            |            | NMT1 thiamine biosynthesis protein                                                         |
| 121629 | + | + | + | + | + | + |            |            | acyl-CoA dehydrogenase                                                                     |
| 121630 | + | + | + | + | + | + |            |            | member of WD40 repeat superfamily                                                          |
| 121638 | + | + | + |   |   |   | 2.859 down | 2.162 down | unique protein                                                                             |
| 121639 | + | + | + | + | + | + |            |            | unknown protein                                                                            |
| 121646 | + | + | + | + | + | + |            |            | vacuolar import and degradation protein 27                                                 |
| 121647 |   |   | + |   |   |   |            |            | unknown protein                                                                            |
| 121652 | + | + | + | + | + | + |            |            | Vacuolar assembly protein Vps41                                                            |
| 121653 | + |   |   |   |   | + |            |            | unknown protein                                                                            |
| 121654 | + | + | + | + | + | + |            |            | UTP6. a Component of the SSU processome                                                    |
| 121656 | + | + | + | + | + | + |            |            | unknown protein                                                                            |
| 121660 | + | + | + |   |   |   |            |            | unknown protein                                                                            |
| 121661 | + | + | + | + | + | + |            |            | aldose-1-epimerase                                                                         |
| 121664 |   |   |   |   |   |   | 1.022 down | 2.411 up   | Glutamate decarboxylase and related proteins                                               |

|        |   |   |   |   |   |   |                |               |                                                    |
|--------|---|---|---|---|---|---|----------------|---------------|----------------------------------------------------|
| 121670 | + | + | + | + | + | + |                |               | Frequency clock protein FRQ-1                      |
| 121681 |   |   |   |   |   |   |                |               | unknown protein                                    |
| 121682 |   |   | + |   |   |   |                |               | Zn2Cys6 transcriptional regulator                  |
| 121684 | + | + | + | + | + | + |                |               | calcium/calmodulin dependent protein kinase 2      |
| 121686 | + | + | + | + | + | + |                |               | Serine hydroxymethyltransferase                    |
| 121689 |   |   |   |   |   |   |                |               | unknown protein                                    |
| 121693 |   |   |   |   |   |   | 2.324<br>down  | 2.982<br>down | Glutathione-dependent formaldehyde-activating. GFA |
| 121702 |   |   |   |   |   |   |                |               | unknown protein                                    |
| 121706 | + | + | + | + | + | + |                |               | DAHPh synthase ARO4                                |
| 121717 | + | + | + | + | + | + |                |               | unknown protein                                    |
| 121725 | + | + | + | + | + | + |                |               | splicing factor SPF30.                             |
| 121732 |   |   |   |   |   |   |                |               | unknown protein                                    |
| 121733 | + | + | + | + | + | + |                |               | delta(14)-sterol reductase                         |
| 121735 |   |   | + |   |   |   | 3.392 up       | 5.256 up      | GH3 $\beta$ -glucosidase CEL3b                     |
| 121739 |   |   |   |   |   |   |                |               | SSCRP                                              |
| 121741 | + | + | + | + | + | + | 1.323 up       | 2.025 up      | Ribosomal protein S7                               |
| 121743 | + | + | + | + | + | + | 1.088 up       | 2.331<br>down | Mitochondrial succinate/fumarate antiporter        |
| 121746 |   |   |   |   |   |   | 1.952 up       | 3.896 up      | GH55 exo-1 3- $\beta$ -glucanase GLUC78            |
| 121750 | + | + | + | + | + | + |                |               | unknown protein                                    |
| 121754 | + | + | + | + | + | + |                |               | Translocation protein Sec63                        |
| 121757 | + | + | + | + | + | + |                |               | C2H2 transcriptional regulator                     |
| 121764 | + | + | + | + | + | + |                |               | unknown protein                                    |
| 121766 | + | + | + | + | + | + |                |               | Telomere and ribosome associated protein           |
| 121773 | + | + | + | + | + | + | 1.896 up       | 2.074<br>down | unknown protein                                    |
| 121774 | + | + | + | + | + | + |                |               | Guanine nucleotide exchange factor Sec12           |
| 121777 | + | + | + | + | + | + |                |               | unknown protein                                    |
| 121785 | + |   |   |   |   |   | 19.861<br>down | 2.194<br>down | ATP-dependent RNA helicase                         |

|        |   |   |   |   |   |   |               |               |                                                                                           |
|--------|---|---|---|---|---|---|---------------|---------------|-------------------------------------------------------------------------------------------|
| 121786 |   |   |   |   |   |   |               |               | unknown protein                                                                           |
| 121789 | + | + | + | + | + | + |               |               | triose-phosphate isomerase-like protein                                                   |
| 121793 | + | + | + | + | + | + |               |               | unknown protein                                                                           |
| 121794 | + | + | + |   |   |   |               |               | Zn2Cys6 transcriptional regulator                                                         |
| 121800 | + | + | + |   |   |   | 1.748<br>down | 2.510<br>down | stomatin-like protein                                                                     |
| 121801 | + | + | + | + | + | + |               |               | NOP58; component of the SSU processome.                                                   |
| 121804 | + | + | + | + | + | + | 1.225 up      | 2.470 up      | Ribosomal protein S15.                                                                    |
| 121814 | + | + | + | + | + | + |               |               | alanine-glyoxylate aminotransferase                                                       |
| 121818 |   |   | + |   |   |   |               |               | unknown secreted protein                                                                  |
| 121820 | + | + | + | + | + | + |               |               | Methionine_syntMethionine synthasevitamin-B independent                                   |
| 121824 | + | + | + | + | + | + | 1.118<br>down | 2.540 up      | ATP citrate lyase. alpha subunit                                                          |
| 121826 | + | + | + | + | + | + |               |               | ATP citrate lyase. beta subunit                                                           |
| 121834 | + | + | + | + | + | + |               |               | adenine nucleotide translocator                                                           |
| 121837 | + | + | + | + | + | + |               |               | Ribosomal protein S5. S7 family                                                           |
| 121839 | + |   | + |   |   |   |               |               | HSP70                                                                                     |
| 121843 | + |   | + |   |   |   |               |               | C6HC zinc finger protein                                                                  |
| 121850 | + | + | + | + | + | + |               |               | hexose transporter                                                                        |
| 121856 | + | + | + | + |   | + |               |               | 4-hydroxyphenylpyruvate dioxygenase                                                       |
| 121864 | + | + | + | + | + | + | 1.059<br>down | 3.088<br>down | unknown protein                                                                           |
| 121868 | + | + | + | + | + | + |               |               | Phosphoglycerate/bisphosphoglycerate mutase                                               |
| 121870 | + | + | + | + | + | + | 3.727<br>down | 2.435<br>down | unknown protein                                                                           |
| 121875 |   |   |   |   |   |   |               |               | Zn2Cys6 transcriptional regulator                                                         |
| 121877 | + | + | + |   |   | + | 4.705<br>down | 3.710<br>down | epoxide hydrolase                                                                         |
| 121878 | + | + | + | + | + | + |               |               | 40s ribosomal protein S19e by homology to the corresponding proteins of G. zeae and E. n. |
| 121883 |   |   |   |   |   |   | 6.827 up      | 4.673 up      | unique secreted protein                                                                   |
| 121889 | + | + | + | + | + | + |               |               | unknown protein                                                                           |

|        |   |   |   |   |   |   |            |            |                                                                                        |
|--------|---|---|---|---|---|---|------------|------------|----------------------------------------------------------------------------------------|
| 121890 | + | + | + | + | + | + |            |            | mitochondrial processing peptidase. α-subunit                                          |
| 121894 | + | + | + | + |   | + |            |            | Zn2Cys6 transcriptional regulator                                                      |
| 121901 | + | + | + | + | + | + |            |            | eukaryotic translation initiation factor 3 subunit 8. N-terminal.                      |
| 121903 | + | + | + | + | + | + |            |            | iron-sulfur cluster assembly accessory protein. putative                               |
| 121904 | + | + | + | + | + | + |            |            | unknown protein                                                                        |
| 121906 | + | + | + | + | + | + | 1.414 up   | 2.027 up   | 40s ribosomal protein S14 (S11 family).                                                |
| 121915 | + | + | + | + | + | + |            |            | Translationally-controlled tumor protein homolog                                       |
| 121920 | + | + | + | + | + | + |            |            | GT57 dolichyl-phosphate-glucose a-glucosyltransferase Alg8                             |
| 121940 | + | + | + | + | + | + |            |            | Tup1                                                                                   |
| 121942 | + | + | + | + | + | + |            |            | Aa_transTransmembrane amino acid transporter protein                                   |
| 121944 | + | + | + | + | + | + | 1.128 down | 2.144 down | serine/threonine protein kinase                                                        |
| 121948 | + | + | + | + | + | + | 1.810 up   | 3.070 up   | signal peptidase spc12                                                                 |
| 121950 | + | + | + | + | + | + |            |            | unknown protein                                                                        |
| 121955 | + | + | + | + | + | + |            |            | Emg1p. a protein required for the maturation of the 18S rRNA and for 40S ribosome prod |
| 121960 | + | + | + | + | + | + |            |            | unknown protein                                                                        |
| 121962 | + | + | + | + | + | + |            |            | Blue light regulator 1 BRL1                                                            |
| 121966 | + | + | + | + | + | + |            |            | Vesicle coat complex COPI. alpha subunit                                               |
| 121968 | + | + | + | + | + | + | 1.714 down | 2.219 down | serine peptidase S28                                                                   |
| 121975 | + | + | + | + | + | + |            |            | Clathrin associated epsin 2A                                                           |
| 121977 | + | + | + | + | + | + |            |            | CytoplasmicCyclophilin                                                                 |
| 121981 | + | + | + | + | + | + |            |            | 26S proteasome regulatory complex subunit Rpn11                                        |
| 121986 |   |   | + |   |   |   |            |            | MFS permease                                                                           |
| 121989 | + | + | + | + | + | + | 1.126 down | 2.243 down | oxalate decarboxylase                                                                  |
| 121990 |   |   |   |   |   |   |            |            | PTH11 GPCR                                                                             |
| 121993 | + | + | + | + | + | + |            |            | unknown protein                                                                        |
| 122001 | + | + | + | + | + | + |            |            | ribosomal protein L14b/L23e.                                                           |
| 122007 |   |   | + |   |   |   | 2.737 up   | 4.789 up   | unique protein                                                                         |

|        |   |   |   |   |   |   |            |            |                                                                            |
|--------|---|---|---|---|---|---|------------|------------|----------------------------------------------------------------------------|
| 122010 |   |   |   |   |   |   |            |            | LdhA Lactate dehydrogenase and related dehydrogenases                      |
| 122013 | + | + | + |   |   |   |            |            | MFS permease                                                               |
| 122015 | + | + | + | + | + | + |            |            | Serine/threonine protein kinase required for receptor-mediated endocytosis |
| 122023 | + | + | + | + | + | + |            |            | unknown protein                                                            |
| 122031 | + | + | + | + |   |   |            |            | SAM-dependent methyltransferase                                            |
| 122036 | + | + | + | + | + | + |            |            | Unknown protein                                                            |
| 122040 | + | + | + | + | + | + | 1.178 up   | 2.036 up   | ribosomal protein L31e.                                                    |
| 122043 | + | + | + |   |   |   |            |            | unknown protein                                                            |
| 122047 |   | + |   |   |   |   |            |            | cell wall protein. Ser/Thr-rich.                                           |
| 122048 | + | + | + | + | + | + | 1.382 up   | 3.580 up   | Sec61 beta subunit                                                         |
| 122050 | + | + | + | + | + | + |            |            | unknown protein                                                            |
| 122064 | + | + | + | + | + | + |            |            | myosin heavy chain                                                         |
| 122065 | + | + | + | + | + | + |            |            | unknown protein                                                            |
| 122067 | + | + | + | + | + | + |            |            | unknown protein                                                            |
| 122069 |   |   |   |   |   |   |            |            | SSCRP                                                                      |
| 122070 | + | + | + | + | + | + |            |            | pre-mRNA-processing factor 17                                              |
| 122071 | + | + | + | + | + | + |            |            | ER-derived vesicles protein Erv14                                          |
| 122074 |   |   | + |   |   |   |            |            | flavoprotein monooxygenases                                                |
| 122075 | + | + | + | + | + | + |            |            | unknown protein                                                            |
| 122076 | + | + | + |   |   |   |            |            | aspartyl protease                                                          |
| 122079 |   | + | + |   |   | + |            |            | short chain dehydrogenase/reductase                                        |
| 122081 |   |   | + |   |   |   | 3.019 down | 33.524 up  | GH7 Endo-β-1.4-glucanase EGL1/CEL7b                                        |
| 122083 |   |   |   |   |   |   |            |            | peptidase family M28                                                       |
| 122084 |   |   |   |   |   |   |            |            | unknown protein                                                            |
| 122087 | + | + | + | + |   | + |            |            | unknown protein                                                            |
| 122089 | + |   | + | + |   | + | 7.444 down | 3.053 down | unknown protein                                                            |
| 122091 | + | + | + | + | + | + | 1.767 down | 2.592 down | phospholipase of papatin-family                                            |

|        |   |   |   |   |   |   |            |            |                                                                                        |
|--------|---|---|---|---|---|---|------------|------------|----------------------------------------------------------------------------------------|
| 122095 | + |   |   |   |   |   |            |            | unknown protein. secreted. only present in ascomycota                                  |
| 122096 |   |   |   |   |   |   | 1.613 up   | 7.382 up   | unknown protein                                                                        |
| 122102 | + | + | + | + | + | + | 1.067 down | 2.049 down | unknown protein                                                                        |
| 122103 |   |   |   |   |   |   |            |            | unknown protein                                                                        |
| 122104 |   | + |   |   |   |   | 1.447 down | 2.368 down | Xanthine/uracil permease family                                                        |
| 122108 | + | + | + | + | + | + |            |            | unknown protein. 1TM. only in Gibberella and Chaetomium                                |
| 122110 |   |   |   |   |   |   |            |            | 4-coumarate:coenzyme A ligase                                                          |
| 122113 | + | + | + | + | + | + | 1.257 up   | 2.126 up   | unknown protein                                                                        |
| 122124 |   |   |   |   |   |   |            |            | AAA ATPase                                                                             |
| 122127 |   |   |   |   |   |   | 1.574 up   | 2.024 up   | SSCRP                                                                                  |
| 122131 | + | + | + | + | + | + |            |            | PCMTProtein-L-isoaspartate(D-aspartate) O-methyltransferase                            |
| 122134 |   |   |   | + |   |   |            |            | unknown protein                                                                        |
| 122139 | + | + | + | + | + | + |            |            | unknown protein                                                                        |
| 122140 |   |   |   | + |   |   | 1.085 down | 2.592 down | unique protein                                                                         |
| 122141 | + | + | + | + | + | + |            |            | Ribosomal protein L28 (L29/L15. rp44. YL24 family). Homologue of S. cerevisiae RPL28.  |
| 122144 | + | + | + | + | + | + |            |            | unknown protein                                                                        |
| 122146 |   |   |   |   |   |   |            |            | unknown protein                                                                        |
| 122147 |   |   |   |   |   |   |            |            | unique protein                                                                         |
| 122153 |   |   |   |   |   |   |            |            | MFS permease                                                                           |
| 122160 |   | + |   |   | + |   | 1.845 up   | 4.787 down | Heat shock proteinwith DnaJ domain                                                     |
| 122166 | + | + | + | + | + | + |            |            | ERG5 C-22 sterol desaturase. a cytochrome P450Enzyme that catalyzes the formation of t |
| 122168 | + | + | + | + | + | + |            |            | unknown protein                                                                        |
| 122169 | + | + | + | + | + | + | 1.214 down | 2.011 down | Histidine kinase. part of a two component signal transduction system                   |
| 122172 | + | + | + | + | + | + |            |            | GT 2. chitin synthase                                                                  |
| 122175 | + | + | + | + | + | + |            |            | ribosome biogenesis protein Urb1 . putative                                            |
| 122176 |   |   | + |   |   |   |            |            | unknown protein                                                                        |

|        |   |   |   |   |   |   |               |               |                                                                              |
|--------|---|---|---|---|---|---|---------------|---------------|------------------------------------------------------------------------------|
| 122178 | + | + | + | + | + | + |               |               | unknown protein                                                              |
| 122180 | + | + | + | + | + | + |               |               | unknown protein                                                              |
| 122187 |   |   |   |   |   |   |               |               | unknown protein                                                              |
| 122193 | + | + | + | + | + | + |               |               | Serine/threonine protein kinase. vps15. involved in vacuolar protein sorting |
| 122197 | + | + | + |   |   |   |               |               | unknown protein                                                              |
| 122198 | + | + | + | + | + | + |               |               | unique protein                                                               |
| 122199 | + | + | + | + | + | + |               |               | cell division control protein 3                                              |
| 122208 | + | + | + | + | + | + |               |               | Zn2Cys6 transcriptional regulator                                            |
| 122210 | + | + | + | + | + | + |               |               | ribosomal protein S4.                                                        |
| 122212 | + | + | + | + | + | + | 1.276<br>down | 2.188<br>down | vacuolar protein-sorting protein BRO1                                        |
| 122220 |   |   |   |   |   |   |               |               | HET protein                                                                  |
| 122226 | + | + | + | + | + | + |               |               | Carbamoyl-phosphate synthase. small chain                                    |
| 122230 | + | + | + | + | + | + |               |               | unknown protein                                                              |
| 122233 | + | + | + | + | + | + |               |               | Iso_dhIsocitrate/isopropylmalate dehydrogenase                               |
| 122240 | + | + | + | + | + | + | 1.159<br>down | 2.210<br>down | Carnitine o-acyltransferase                                                  |
| 122242 |   | + | + |   |   |   |               |               | unknown protein. 1 TM                                                        |
| 122255 | + | + | + | + | + | + |               |               | unknown protein                                                              |
| 122262 |   |   |   |   |   |   |               |               | unknown protein                                                              |
| 122271 |   |   |   |   |   |   |               |               | Zn2Cys6 transcription regulator. C. albicans Fcr1                            |
| 122275 |   |   |   |   |   |   |               |               | Phenylalanyl-tRNA synthetase                                                 |
| 122278 | + | + | + | + | + | + | 1.099<br>down | 2.065 up      | U3 small nucleolar RNA associated protein (SOF1)                             |
| 122283 | + | + | + | + | + | + |               |               | SWI-SNF chromatin-remodeling complex protein                                 |
| 122284 | + | + | + | + | + | + | 1.420<br>down | 2.615<br>down | vel1. velvet protein                                                         |
| 122287 | + | + | + | + | + | + |               |               | glutamate synthase (NADPH). PUBMED 15846337                                  |
| 122293 |   |   |   |   |   |   | 1.035<br>down | 2.797<br>down | unknown protein                                                              |
| 122296 | + | + | + | + | + | + |               |               | citrate (Si)-synthase                                                        |

|        |   |   |   |   |   |   |               |               |                                                                                           |
|--------|---|---|---|---|---|---|---------------|---------------|-------------------------------------------------------------------------------------------|
| 122299 | + | + | + | + | + | + |               |               | unknown protein                                                                           |
| 122301 | + | + | + | + | + | + |               |               | Cystathionine beta-lyases/cystathionine gamma-synthases                                   |
| 122304 | + | + | + | + | + | + |               |               | unknown protein                                                                           |
| 122314 |   |   |   |   |   |   |               |               | unknown protein                                                                           |
| 122324 |   |   |   |   |   |   |               |               | SSCRP                                                                                     |
| 122349 | + | + | + | + | + | + |               |               | unknown protein                                                                           |
| 122350 | + | + | + | + | + | + | 1.366<br>down | 3.530<br>down | Glutamate decarboxylase                                                                   |
| 122363 | + |   | + |   |   |   | 2.768<br>down | 2.497 up      | Hsp26/Hsp42                                                                               |
| 122366 | + | + | + | + | + | + | 1.161<br>down | 2.117<br>down | unknown protein                                                                           |
| 122371 | + | + | + | + | + | + |               |               | bHLH transcriptional regulator                                                            |
| 122374 |   |   |   |   |   |   | 5.802 up      | 7.071 up      | MRSP1/expansin-like                                                                       |
| 122375 |   |   |   |   |   |   |               |               | MRSP1/expansin-like                                                                       |
| 122376 |   |   | + |   |   |   |               |               | unknown protein                                                                           |
| 122378 |   |   |   |   |   |   |               |               | Ribonuclease II                                                                           |
| 122381 | + | + | + | + | + | + |               |               | unknown protein                                                                           |
| 122384 | + | + | + | + | + | + |               |               | unknown protein                                                                           |
| 122385 | + | + | + | + | + | + |               |               | glucosamine 6-phosphate synthetase                                                        |
| 122387 | + | + | + | + | + | + |               |               | transcriptional regulator HMG type                                                        |
| 122392 | + | + | + | + | + | + |               |               | Rfc2p of <i>Saccharomyces cerevisiae</i> .                                                |
| 122396 | + | + | + | + | + | + |               |               | Nuclear transport regulator Npl4                                                          |
| 122405 | + | + | + | + | + | + |               |               | Ubiquitin-specific protease involved in catabolite repression. Appears to be part of a co |
| 122410 | + | + | + | + | + | + |               |               | Exocyst component Sec10                                                                   |
| 122415 | + | + | + | + | + | + |               |               | Protein disulfide isomerase 1                                                             |
| 122416 | + |   |   |   |   |   |               |               | NADH:flavin oxidoreductase/NADH oxidase                                                   |
| 122419 | + | + | + | + |   |   |               |               | Phosphatidylinositol 4.5-bisphosphate 5-phosphatase                                       |
| 122422 |   | + | + |   |   |   | 6.607 up      | 4.563 up      | SSCRP                                                                                     |
| 122428 |   | + |   |   |   |   |               |               | unknown protein                                                                           |



|        |   |   |   |   |   |   |            |            |                                                                                       |
|--------|---|---|---|---|---|---|------------|------------|---------------------------------------------------------------------------------------|
| 122431 | + | + | + | + | + | + |            |            | Pex19 (peroxin). a 40 kDa farnesylated protein associated with peroxisomes.           |
| 122447 | + | + | + | + | + | + |            |            | Rad52                                                                                 |
| 122448 |   |   |   |   |   |   | 1.273 up   | 7.482 up   | C2H2 transcription factor                                                             |
| 122455 | + | + | + | + | + | + |            |            | unknown protein                                                                       |
| 122457 | + | + | + | + | + | + |            |            | transcriptional activator Helix-turn-helix type 3                                     |
| 122468 | + | + | + | + | + | + |            |            | GadB Glutamate decarboxylase and related PLP-dependent proteins                       |
| 122476 | + | + | + |   |   |   |            |            | ATG5 protein                                                                          |
| 122480 | + | + | + | + | + | + |            |            | unknown protein                                                                       |
| 122487 |   |   |   |   |   |   |            |            | DNase                                                                                 |
| 122495 |   |   |   |   |   |   |            |            | GH76 $\alpha$ -1.6-mannanase                                                          |
| 122497 | + | + | + |   |   |   |            |            | unknown protein                                                                       |
| 122499 |   |   |   |   |   |   | 1.816 down | 2.904 up   | unknown protein                                                                       |
| 122500 |   |   |   |   |   |   |            |            | Histone tail methylase containing SET domain                                          |
| 122501 |   |   |   |   |   |   |            |            | unknown protein                                                                       |
| 122505 |   |   |   |   |   |   | 2.914 down | 4.134 down | aryl-alcohol dehydrogenase                                                            |
| 122506 |   |   |   |   |   |   |            |            | unique protein                                                                        |
| 122511 |   | + | + |   |   |   |            |            | glucan endo-1.3(4)- $\beta$ -D-glucosidase                                            |
| 122523 | + | + | + | + | + | + |            |            | Zn2Cys6 transcriptional regulator                                                     |
| 122526 | + | + | + | + | + | + | 1.039 up   | 5.874 up   | unknown protein                                                                       |
| 122527 | + | + | + |   |   |   |            |            | unknown proteinwith Duf718 domain                                                     |
| 122529 | + | + | + | + | + | + | 2.395 up   | 2.493 up   | S1/P1 Nuclease                                                                        |
| 122531 | + | + | + | + | + | + |            |            | AsdAspartate-semialdehyde dehydrogenase                                               |
| 122533 | + | + | + | + | + | + |            |            | AldehdAldehyde dehydrogenase family                                                   |
| 122541 | + | + | + | + | + | + | 1.175 down | 2.915 down | C2H2 transcriptional regulator                                                        |
| 122546 | + | + | + | + | + | + |            |            | Vacuolar protein sorting-associated protein Vps27                                     |
| 122551 | + | + | + | + | + | + |            |            | mpg1 encoding mannose-1-phosphate guanyltransferase involved in the O-glycosylation p |
| 122552 | + | + | + | + | + | + |            |            | dynein light chain                                                                    |

|        |   |   |   |   |   |   |               |               |                                                                                 |
|--------|---|---|---|---|---|---|---------------|---------------|---------------------------------------------------------------------------------|
| 122556 |   | + |   |   |   |   | 7.167 up      | 13.985 up     | Short-chain dehydrogenase/reductase                                             |
| 122565 | + | + | + |   | + |   |               |               | CysKCysteine synthase                                                           |
| 122567 | + | + | + | + | + | + | 1.795<br>down | 2.102<br>down | unknown protein                                                                 |
| 122569 |   |   |   |   |   |   |               |               | unknown protein                                                                 |
| 122571 |   |   |   |   |   |   |               |               | unknown protein                                                                 |
| 122572 | + | + | + | + | + | + | 1.105<br>down | 2.299 up      | hsp70 family protein                                                            |
| 122576 |   | + |   |   |   |   |               |               | unknown protein                                                                 |
| 122579 |   |   | + |   |   |   | 5.546 up      | 4.905 up      | unknown protein. 4TM                                                            |
| 122582 | + |   | + |   |   |   |               |               | unknown protein                                                                 |
| 122584 | + | + | + | + | + | + |               |               | helix-turn-helix transcription factor                                           |
| 122587 | + | + | + | + | + | + |               |               | unknown protein                                                                 |
| 122590 | + | + | + | + | + | + |               |               | unknown protein. unique in fungi. 1TM                                           |
| 122592 | + | + | + | + | + | + |               |               | PhosphoinositidePhosphatase. sac1. involved inProtein trafficking and secretion |
| 122593 | + | + | + | + | + | + |               |               | Secretion related GTPase Rab5/Ypt51                                             |
| 122614 | + | + |   |   | + |   | 2.211<br>down | 3.394<br>down | unique protein                                                                  |
| 122628 | + | + | + | + | + | + |               |               | unknown protein                                                                 |
| 122629 |   |   |   |   |   |   | 4.133 up      | 3.481 up      | unique protein                                                                  |
| 122630 | + | + | + |   | + | + |               |               | unknown protein                                                                 |
| 122641 | + | + | + | + | + | + |               |               | nicotinate phosphoribosyltransferase                                            |
| 122644 | + | + | + | + | + | + |               |               | CDP-alcohol phosphatidyltransferase                                             |
| 122646 | + | + | + |   |   |   |               |               | Alpha/beta hydrolase                                                            |
| 122653 | + | + | + | + | + | + |               |               | squalene synthase                                                               |
| 122656 | + | + | + | + | + | + |               |               | unknown protein                                                                 |
| 122657 | + | + | + | + | + | + |               |               | unknown protein                                                                 |
| 122659 | + | + | + | + | + | + |               |               | UTP4. a component of the SSU processome                                         |
| 122662 | + | + | + | + | + | + |               |               | unknown protein                                                                 |
| 122666 | + | + | + | + |   | + |               |               | unknown protein                                                                 |

|        |   |   |   |   |   |   |               |               |                                                              |
|--------|---|---|---|---|---|---|---------------|---------------|--------------------------------------------------------------|
| 122679 | + | + | + | + | + | + |               |               | unknown protein                                              |
| 122680 | + | + | + | + | + | + |               |               | C2H2 transcriptional regulator                               |
| 122684 | + | + | + | + | + | + |               |               | transcriptional regulator. unknown                           |
| 122689 | + | + | + |   |   |   |               |               | unknown protein                                              |
| 122692 | + | + | + | + | + | + |               |               | unknown protein                                              |
| 122696 | + | + | + | + | + | + |               |               | unknown protein                                              |
| 122697 | + | + | + | + | + | + |               |               | ribosomal protein L36                                        |
| 122701 | + | + | + | + | + | + |               |               | actin-like protein                                           |
| 122703 | + | + | + | + | + | + |               |               | mitochondrial-processing peptidase subunit beta              |
| 122708 | + | + | + | + | + | + |               |               | Late Golgi protein sorting complex. subunit Vps53            |
| 122717 | + | + | + | + | + | + |               |               | ubi4 ; polyubiquitin                                         |
| 122724 |   |   |   |   |   |   |               |               | unknown protein. only in neurospora and Chaetomium           |
| 122730 | + | + | + | + | + | + |               |               | Esterase/lipase/thioesterase superfamily                     |
| 122734 | + | + | + |   |   |   |               |               | unique protein                                               |
| 122735 | + | + | + | + | + | + |               |               | protein kinase                                               |
| 122736 | + | + | + | + | + | + |               |               | tagatose bisphosphate aldolase                               |
| 122743 | + | + | + | + | + | + |               |               | F-acting capping protein. alpha subunit                      |
| 122745 | + | + | + | + | + | + | 1.845 up      | 3.234 up      | 2-oxoisovalerate dehydrogenase subunit beta. putative        |
| 122756 | + | + | + | + | + | + |               |               | unknown protein                                              |
| 122767 | + | + | + | + | + | + |               |               | N-terminal cooper fist DNA-binding domain-containing protein |
| 122774 | + | + | + | + | + | + |               |               | 2-nitropropane dioxygenase                                   |
| 122778 |   |   |   |   |   |   | 7.686<br>down | 2.730<br>down | short chain dehydrogenase/reductase                          |
| 122780 |   |   |   |   |   |   | 4.450 up      | 6.086 up      | GH28 exo-rhamnogalacturonase RGX1                            |
| 122783 | + |   |   |   |   |   |               |               | Zn2Cys6 transcriptional regulator                            |
| 122792 |   |   |   |   |   |   |               |               | unknown protein                                              |
| 122794 | + | + | + | + | + | + |               |               | unique protein                                               |
| 122795 |   |   | + |   |   |   | 1.517<br>down | 2.720<br>down | PTH11 GPCR                                                   |
| 122811 | + | + | + | + | + | + |               |               | glutamine synthetase                                         |

|        |   |   |   |   |   |   |             |            |                                                                                      |
|--------|---|---|---|---|---|---|-------------|------------|--------------------------------------------------------------------------------------|
| 122813 |   |   |   |   |   |   | 2.128 up    | 3.983 up   | unique protein                                                                       |
| 122817 |   | + | + |   |   |   |             |            | unknown protein                                                                      |
| 122819 |   | + | + | + | + | + | 1.837 up    | 3.820 up   | DNA replication complex GINS protein PSF3                                            |
| 122820 |   |   |   |   |   |   | 22.692 down | 3.281 down | Kynurenine aminotransferase. glutamine transaminase K                                |
| 122823 |   | + |   |   |   |   |             |            | unknown protein                                                                      |
| 122824 |   |   |   | + |   |   | 10.764 down | 35.206 up  | PTH11 GPCR                                                                           |
| 122825 |   |   |   |   |   |   | 2.051 down  | 3.847 down | unknown protein                                                                      |
| 122828 |   |   |   |   |   |   |             |            | nicotinamide riboside kinase 1. putative                                             |
| 122833 |   | + | + | + | + | + |             |            | unknown protein                                                                      |
| 122838 |   | + | + | + | + | + |             |            | unknown protein                                                                      |
| 122841 | + | + | + | + | + | + |             |            | Exocyst component Sec3                                                               |
| 122846 |   | + | + | + | + | + |             |            | ATP-dependent RNA helicase.                                                          |
| 122855 |   | + | + | + | + | + |             |            | unknown protein                                                                      |
| 122856 |   |   |   | + |   |   |             |            | unknown protein                                                                      |
| 122857 |   | + | + | + | + | + |             |            | prohibitin-2                                                                         |
| 122860 |   |   |   |   |   |   |             |            | unknown protein                                                                      |
| 122864 |   | + | + | + | + | + |             |            | pre-mRNA splicing factor                                                             |
| 122868 |   | + | + | + | + | + |             |            | ThrA Homoserine dehydrogenase                                                        |
| 122870 |   | + | + | + | + | + | 2.089 up    | 3.578 up   | cell wall protein. CwpA                                                              |
| 122872 |   | + | + | + | + | + |             |            | Ubiquitin conjugating enzyme variant Mms2. a protein required for theUbc13-dependent |
| 122874 |   |   | + | + |   |   |             |            | unknown protein                                                                      |
| 122879 |   | + | + | + | + | + |             |            | bHLH transcriptional regulator                                                       |
| 122882 |   | + | + | + | + | + |             |            | Hsp90 co-chaperone AHA1                                                              |
| 122886 |   | + | + | + | + | + |             |            | Tubulin beta chain 2                                                                 |
| 122889 |   |   |   |   |   |   | 36.228 down | 2.689 down | unknown protein                                                                      |
| 122897 |   |   |   |   |   |   |             |            | unknown protein                                                                      |
| 122898 |   | + | + | + | + | + |             |            | unknown protein                                                                      |

|        |   |   |   |   |   |   |               |               |                                                                                                         |
|--------|---|---|---|---|---|---|---------------|---------------|---------------------------------------------------------------------------------------------------------|
| 122900 | + | + | + | + | + | + |               |               | ribosomal protein RSM22.                                                                                |
| 122903 | + | + | + | + | + | + |               |               | unknown protein                                                                                         |
| 122909 | + | + | + | + | + | + |               |               | translation elongation factor eEF-3 homologue YPL226w of <i>Saccharomyces cerevisiae</i> .              |
| 122914 | + | + | + | + | + | + |               |               | unknown protein                                                                                         |
| 122920 | + | + | + | + | + | + |               |               | Molecular chaperone Bip                                                                                 |
| 122929 | + | + | + | + | + | + |               |               | unknown protein                                                                                         |
| 122931 |   |   |   |   |   |   |               |               | unknown protein                                                                                         |
| 122941 |   |   |   |   |   |   | 1.806<br>down | 3.349 up      | unique secreted protein with CFEM domain                                                                |
| 122943 | + | + | + |   |   |   |               |               | SWI-SNF chromatin-remodeling complex protein                                                            |
| 122948 |   |   |   |   |   |   |               |               | multicopper oxidase                                                                                     |
| 122952 | + | + | + | + |   | + |               |               | unknown protein                                                                                         |
| 122956 | + | + | + | + | + | + |               |               | Ribosomal protein S27 based on homology to the corresponding protein of <i>N. crassa</i> .              |
| 122960 | + | + | + | + | + | + |               |               | Amidase                                                                                                 |
| 122963 | + | + | + | + | + | + |               |               | Cu_amine_oxidCopper amine oxidaseenzyme domain aligned                                                  |
| 122971 | + | + | + | + | + |   |               |               | unknown protein. only in <i>Chaetomium</i> . <i>A. oryzae</i> . <i>fumigatus</i> and <i>Magnaporthe</i> |
| 122972 |   |   |   |   |   |   |               |               | Cation transporting ATPase                                                                              |
| 122974 |   |   |   |   |   |   | 1.233<br>down | 2.272<br>down | unknown protein                                                                                         |
| 122975 |   |   |   |   |   |   |               |               | unique protein with collagen triple helix repeat                                                        |
| 122987 | + | + | + | + | + | + |               |               | pyruvate dehydrogenase. E1 component alpha subunit                                                      |
| 122988 | + | + | + | + | + | + |               |               | MRP-type ABC transporter                                                                                |
| 122992 |   |   |   |   |   |   | 2.333<br>down | 2.545 up      | GT 31 $\beta$ -glycosyltransferase                                                                      |
| 122993 |   | + |   |   |   |   |               |               | GT2 polysaccharide-forming $\beta$ -glycosyltransferase; distantly animal hyaluronan synthase           |
| 122994 | + | + | + | + | + | + | 1.279<br>down | 2.043<br>down | unknown protein                                                                                         |
| 122995 |   |   |   |   |   |   | 1.115 up      | 2.386<br>down | unknown protein                                                                                         |
| 122998 |   |   |   |   |   |   |               |               | unknown protein                                                                                         |
| 123008 |   |   |   |   |   |   |               |               | unknown protein                                                                                         |

|        |   |   |   |   |   |   |            |            |                                                                                            |
|--------|---|---|---|---|---|---|------------|------------|--------------------------------------------------------------------------------------------|
| 123009 |   |   | + |   |   |   | 2.980 up   | 2.582 up   | glutamine synthetase                                                                       |
| 123013 | + | + | + | + | + | + |            |            | Phosphatidylinositol 4-kinase                                                              |
| 123014 | + | + | + | + | + | + |            |            | unknown protein                                                                            |
| 123015 | + | + | + | + | + | + |            |            | Secretion related GTPase Rab5/Ypt51                                                        |
| 123019 |   |   |   |   |   |   | 1.298 down | 2.272 down | unknown protein                                                                            |
| 123026 | + | + | + | + | + | + |            |            | transaldolase                                                                              |
| 123029 | + | + | + | + | + | + | 1.339 down | 6.480 down | Cu <sup>2+</sup> /Zn <sup>2+</sup> superoxide dismutase SOD1                               |
| 123030 | + | + | + | + | + | + |            |            | unknown protein                                                                            |
| 123039 |   |   | + | + |   |   | 1.031 down | 2.278 up   | HFBs                                                                                       |
| 123047 | + | + | + | + | + | + |            |            | unknown protein                                                                            |
| 123056 | + | + | + | + | + | + |            |            | hex1. encodes the major protein of the Woronin body forming a plug between fungal com      |
| 123066 | + | + | + | + | + | + |            |            | unknown protein                                                                            |
| 123071 | + | + | + | + | + | + |            |            | ATP synthase beta chain. mitochondrial precursor. associated to cellulase signal transduct |
| 123079 |   |   |   |   |   |   | 7.591 up   | 9.716 up   | short chain dehydrogenase/reductase                                                        |
| 123084 |   |   |   |   |   |   | 1.995 down | 2.052 down | chloroperoxidase                                                                           |
| 123086 |   |   |   |   |   |   |            | 190.175 up | SSCRP                                                                                      |
| 123090 | + | + | + | + | + | + |            |            | unknown protein                                                                            |
| 123095 |   |   |   |   |   |   | 2.880 up   | 2.588 down | unique protein                                                                             |
| 123111 | + | + | + | + | + | + |            |            | Sorting nexin-1-like protein Vps5                                                          |
| 123113 | + | + | + | + | + | + |            |            | unknown protein                                                                            |
| 123114 | + | + | + | + | + | + |            |            | Heat shock protein 90                                                                      |
| 123118 | + | + | + | + | + | + |            |            | DnaJ-like protein JJ3. involved inDiphthamide biosynthesis.                                |
| 123120 |   |   |   |   |   |   | 1.200 up   | 2.241 up   | unknown protein. 8 TM                                                                      |
| 123124 | + | + | + | + | + | + |            |            | unknown protein                                                                            |
| 123125 | + | + | + | + | + | + |            |            | unknown protein                                                                            |

|        |   |   |   |   |   |   |   |               |               |                                                                                                |
|--------|---|---|---|---|---|---|---|---------------|---------------|------------------------------------------------------------------------------------------------|
| 123126 |   |   |   |   |   |   |   |               |               | unknown protein                                                                                |
| 123130 |   | + | + | + | + | + | + |               |               | unique protein                                                                                 |
| 123131 |   | + | + | + | + |   |   |               |               | endonuclease/exonuclease/phosphatase. putative                                                 |
| 123134 |   | + | + | + |   |   |   |               |               | unknown protein                                                                                |
| 123144 |   | + | + | + | + | + | + |               |               | unknown protein                                                                                |
| 123145 |   | + | + | + | + | + | + |               |               | Ribosomal protein L17                                                                          |
| 123149 |   |   |   |   |   |   |   | 2.559<br>down | 3.075<br>down | unknown protein                                                                                |
| 123152 |   | + | + | + | + | + | + |               |               | Cation efflux protein                                                                          |
| 123155 |   | + | + | + | + | + | + |               |               | Clathrin lightChain.Clc1. vesicleCoat protein                                                  |
| 123158 |   | + | + | + | + | + | + |               |               | t-SNARE Tlg2. endosome-derived vesicles-late Golgi                                             |
| 123163 |   | + | + | + | + | + | + |               |               | γ-adaptin. apl4. large subunit of the adaptor protein (AP) complex of clathrin-coated vesicles |
| 123164 |   | + | + | + | + | + | + |               |               | Signal recognition particle. subunit Srp72                                                     |
| 123173 |   | + | + | + | + | + | + |               |               | GT41 UDP-N-acetylglucosamine:peptide N-acetylglucosaminyltransferases                          |
| 123174 |   | + | + | + | + | + | + |               |               | Phosphoglycerate dehydrogenase and related dehydrogenases; RibA GTP cyclohydrolase I           |
| 123176 |   | + | + | + | + | + | + |               |               | 60S ribosomal protein L12 (L11 family).                                                        |
| 123179 |   | + | + | + |   |   | + |               |               | GTP cyclohydrolase                                                                             |
| 123180 |   | + | + | + | + | + | + | 1.257 up      | 2.173 up      | Seryl-tRNA synthetase. class IIa.                                                              |
| 123183 |   | + | + | + | + | + | + |               |               | Ca <sup>2+</sup> transporter. putative                                                         |
| 123185 |   | + | + | + | + | + | + |               |               | myosin heavy chain                                                                             |
| 123186 |   | + | + | + |   |   |   |               |               | unknown protein                                                                                |
| 123188 | + |   | + |   |   |   |   |               |               | unknown protein                                                                                |
| 123191 |   | + | + | + | + | + | + | 1.029<br>down | 2.562 up      | unknown protein                                                                                |
| 123196 |   |   |   |   |   |   |   |               |               | unknown protein                                                                                |
| 123198 |   | + | + | + | + | + | + |               |               | succinate dehydrogenase                                                                        |
| 123199 |   |   |   |   |   |   |   | 3.404 up      | 5.813 up      | SSCRP                                                                                          |
| 123202 |   | + | + | + | + | + | + |               |               | 60s ribosomal protein rla2                                                                     |
| 123204 |   |   | + | + |   | + |   | 3.159 up      | 2.647 up      | lipase/esterase                                                                                |

|        |   |   |   |   |   |   |                |               |                                                  |
|--------|---|---|---|---|---|---|----------------|---------------|--------------------------------------------------|
| 123205 |   |   |   |   |   |   | 1.029<br>down  | 2.750 up      | unknown protein                                  |
| 123207 |   |   |   |   |   |   | 3.296 up       | 2.828 up      | unknown protein                                  |
| 123213 | + | + | + | + | + | + |                |               | cell wall protein. Ser/Thr-rich.                 |
| 123220 | + | + | + | + | + | + |                |               | unknown protein                                  |
| 123223 | + | + | + |   |   |   |                |               | threonine aldolase GLY1                          |
| 123226 | + | + | + | + | + | + | 3.145<br>down  | 8.238<br>down | GH37 $\alpha$ . $\alpha$ -trehalase              |
| 123227 |   |   |   |   |   |   | 1.187<br>down  | 2.591<br>down | unknown protein                                  |
| 123228 | + | + | + | + | + | + |                |               | clathrin heavy chain. chc1. vesicle coat protein |
| 123232 |   |   |   |   |   |   | 15.789<br>down | 11.782 up     | GH12 endo- $\beta$ -1.4-glucanase                |
| 123234 |   |   |   |   |   |   |                |               | Subtilisin like protease (SUB9)                  |
| 123236 |   |   |   |   |   |   | 1.222 up       | 3.011 up      | SSCRP                                            |
| 123238 |   |   | + |   |   |   |                |               | epoxide hydrolase                                |
| 123241 | + |   | + |   |   |   |                |               | MFS permease                                     |
| 123244 | + | + | + | + | + | + |                |               | Serine proteinase Sub8                           |
| 123251 |   |   |   |   |   |   |                |               | flavo-hemoglobin                                 |
| 123255 | + | + | + | + | + | + |                |               | unknown protein                                  |
| 123256 |   | + |   |   |   |   | 2.168 up       | 2.251 up      | unknown protein                                  |
| 123258 | + | + | + | + | + | + |                |               | rho3                                             |
| 123260 |   |   |   |   |   |   |                |               | unknown protein                                  |
| 123261 |   |   |   |   |   |   |                |               | unknown protein                                  |
| 123262 |   |   |   |   |   |   | 1.494<br>down  | 4.007<br>down | unique protein. HTG. amidase domain. 1 TM        |
| 123265 | + | + | + | + | + | + | 1.801 up       | 2.330 up      | unknown protein                                  |
| 123274 |   |   |   |   |   |   | 5.664<br>down  | 4.439<br>down | Aldehyde dehydrogenase                           |
| 123278 |   |   |   |   |   |   | 1.875 up       | 3.054 up      | unknown protein                                  |
| 123279 | + | + | + | + | + | + |                |               | a-L-arabinofuranosidase I (Abf1) (EC 3.2.1.55)   |



|        |   |   |   |  |  |   |               |               |                                                                                      |
|--------|---|---|---|--|--|---|---------------|---------------|--------------------------------------------------------------------------------------|
| 123282 |   |   |   |  |  |   | 2.097<br>down | 3.305<br>down | unknown protein                                                                      |
| 123283 |   |   |   |  |  |   |               |               | GH54 $\alpha$ -L-arabinofuranosidase I ABF1                                          |
| 123288 |   |   |   |  |  | + |               |               | xylulokinase                                                                         |
| 123290 |   |   |   |  |  | + |               |               | sodium/hydrogen exchanger                                                            |
| 123293 |   |   |   |  |  | + |               |               | MDR-type ABC transporters                                                            |
| 123296 |   |   |   |  |  | + |               |               | unknown protein                                                                      |
| 123302 |   |   |   |  |  | + |               |               | G-protein alpha subunit 1 GNA1                                                       |
| 123313 |   |   |   |  |  | + |               |               | Serine/threonine protein kinase                                                      |
| 123321 |   |   |   |  |  | + |               |               | unknown protein                                                                      |
| 123324 |   |   |   |  |  | + |               |               | unknown protein                                                                      |
| 123325 |   |   |   |  |  | + | 2.108 up      | 2.548 up      | zinc transporter                                                                     |
| 123327 |   |   |   |  |  |   |               |               | SWI-SNF chromatin-remodeling complex protein                                         |
| 123343 |   |   |   |  |  | + |               |               | unknown protein                                                                      |
| 123344 |   |   |   |  |  | + |               |               | histidine phosphotransferase. tripartite hybrid signal transduction histidine kinase |
| 123354 |   |   |   |  |  |   |               |               | unknown protein                                                                      |
| 123363 |   |   |   |  |  | + |               |               | unknown protein                                                                      |
| 123364 |   |   |   |  |  | + |               |               | Protein involved in ER to Golgi transport Sly41                                      |
| 123368 |   |   |   |  |  | + |               |               | GH13 1.4- $\alpha$ -glucan branching enzyme                                          |
| 123382 |   |   |   |  |  | + |               |               | Coproporphyrinogen III oxidase                                                       |
| 123396 |   |   |   |  |  |   | 1.023<br>down | 3.179 up      | unknown protein                                                                      |
| 123408 |   |   |   |  |  | + |               |               | Actin-like protein 3                                                                 |
| 123422 |   |   |   |  |  | + |               |               | GAP Gyp1                                                                             |
| 123426 |   |   |   |  |  | + |               |               | unknown protein                                                                      |
| 123429 |   |   |   |  |  | + |               |               | unique protein                                                                       |
| 123431 |   |   |   |  |  |   |               |               | thymine diunknown proteingenase                                                      |
| 123437 |   |   |   |  |  |   |               |               | unknown protein                                                                      |
| 123441 | + | + | + |  |  |   | 2.384 up      | 2.308 up      | unknown protein                                                                      |
| 123445 |   |   |   |  |  |   |               |               | Zn2Cys6 transcriptional regulator                                                    |

|        |   |   |   |   |   |   |               |                |                                                                                   |
|--------|---|---|---|---|---|---|---------------|----------------|-----------------------------------------------------------------------------------|
| 123455 |   |   |   |   |   |   | 1.035<br>down | 2.549<br>down  | unknown protein                                                                   |
| 123456 | + | + | + |   |   |   |               |                | GH65 $\alpha$ . $\alpha$ -trehalase                                               |
| 123457 | + | + | + | + | + | + |               |                | CTP synthase                                                                      |
| 123459 |   |   |   |   |   |   |               |                | high affinity nickel permease                                                     |
| 123460 |   |   |   |   |   |   |               |                | unknown protein                                                                   |
| 123468 |   |   |   |   |   |   |               |                | IMP dehydrogenase                                                                 |
| 123471 | + | + | + | + | + | + |               |                | Subtilisin like protease. related to <i>S. cerevisiae</i> Kex2 protease           |
| 123473 |   |   |   |   |   |   | 3.810<br>down | 14.364<br>down | MFS permease                                                                      |
| 123475 | + | + | + | + | + | + | 1.527<br>down | 3.709<br>down  | cell wall Thr-rich mannoprotein. Distantly related to <i>S. cerevisiae</i> Dan4p. |
| 123476 |   |   | + |   |   |   | 1.094<br>down | 5.959 up       | unknown protein                                                                   |
| 123493 | + | + | + | + | + | + | 1.073<br>down | 3.276<br>down  | Ubiquitin-protein ligase (E3)                                                     |
| 123499 |   |   |   |   |   |   |               |                | HET-s/LopB domain protein                                                         |
| 123502 | + | + | + | + | + | + |               |                | CBM 21                                                                            |
| 123508 |   |   |   |   |   |   |               |                | unknown protein                                                                   |
| 123509 |   |   |   |   |   |   | 1.506 up      | 3.955<br>down  | Zn2Cys6 transcriptional regulator                                                 |
| 123510 |   |   |   |   |   |   | 1.330<br>down | 8.529<br>down  | Zn2Cys6 transcriptional regulator                                                 |
| 123538 | + | + | + | + | + | + |               |                | GH72 $\beta$ -1 3-glucanosyltransferase                                           |
| 123539 |   |   |   |   |   |   |               |                | unknown protein. only in <i>Gibberella</i> and <i>Arabidopsis</i>                 |
| 123540 | + | + | + | + | + | + |               |                | unknown protein                                                                   |
| 123541 | + |   | + | + | + | + |               |                | mitochondrial carrier protein                                                     |
| 123543 |   |   | + |   |   |   |               |                | unknown protein                                                                   |
| 123550 |   |   |   |   |   |   |               |                | Indoleamine 2.3-dioxygenase-like protein                                          |
| 123551 | + | + | + | + | + | + |               |                | unknown protein                                                                   |
| 123553 | + | + | + | + |   |   | 2.779 up      | 2.147 up       | short chain dehydrogenase/reductase                                               |

|        |   |   |   |   |   |   |               |               |                                                                                      |
|--------|---|---|---|---|---|---|---------------|---------------|--------------------------------------------------------------------------------------|
| 123554 | + | + | + | + | + | + |               |               | OTU-like cysteine protease. putative                                                 |
| 123556 | + | + | + | + | + | + |               |               | unknown protein                                                                      |
| 123559 | + | + | + | + | + | + |               |               | ubiquitin-conjugating enzyme                                                         |
| 123561 | + | + | + | + | + | + |               |               | Kex2 protease to <i>S. cerevisiae</i> Kex2 protease                                  |
| 123562 | + | + | + | + | + | + |               |               | Sorting nexin.Snx4; involved in maturation of the vacuolar aminopeptidase I in yeast |
| 123571 | + | + | + | + | + | + |               |               | unknown protein                                                                      |
| 123572 | + | + | + |   |   | + | 2.634<br>down | 2.278<br>down | Phospholipase A2                                                                     |
| 123577 | + | + | + | + | + | + |               |               | Endoplasmatic reticulum oxidising protein Ero1                                       |
| 123588 | + | + | + | + | + | + |               |               | electron transport protein. probably involved in cytochrome C assembly               |
| 123598 | + | + | + | + | + | + |               |               | nuclear pore protein                                                                 |
| 123604 | + | + | + | + | + | + | 1.224 up      | 2.042 up      | Rps24 (family S16) by homology with similar proteins in other fungi.                 |
| 123608 |   |   |   |   |   |   | 1.373 up      | 2.603 up      | unique protein                                                                       |
| 123611 | + | + | + | + | + | + |               |               | amino acid permease                                                                  |
| 123614 | + | + | + | + | + | + |               |               | unknown protein                                                                      |
| 123616 |   |   | + |   |   |   | 1.984 up      | 2.365 up      | short unique protein                                                                 |
| 123618 | + | + | + | + | + | + |               |               | HD family hydrolase. putative                                                        |
| 123619 | + | + | + | + | + | + |               |               | SAGA complex subunit (Ada2)                                                          |
| 123627 | + | + | + | + | + | + |               |               | short chain dehydrogenase/reductase                                                  |
| 123629 | + | + | + | + | + | + |               |               | SSCRP                                                                                |
| 123631 | + | + | + | + | + | + |               |               | Saccharopine dehydrogenase                                                           |
| 123633 |   |   |   |   |   |   |               |               | homoserine o-acetyltransferase                                                       |
| 123636 | + | + | + | + | + | + | 1.722<br>down | 2.658<br>down | unknown protein                                                                      |
| 123639 |   |   |   |   |   |   | 5.100 up      | 2.625 up      | GH64 endo-1.3-β-glucanase                                                            |
| 123648 |   |   |   |   |   |   |               |               | unknown protein                                                                      |
| 123649 | + |   |   |   |   |   | 1.749<br>down | 3.910<br>down | unique protein                                                                       |
| 123650 | + | + | + | + |   | + |               |               | unique protein                                                                       |
| 123655 | + | + | + | + | + | + |               |               | Protein involved in regulation of arginine-responsive genes                          |

|        |   |   |   |   |   |   |                |               |                                                                      |
|--------|---|---|---|---|---|---|----------------|---------------|----------------------------------------------------------------------|
| 123658 |   |   |   |   |   |   |                |               | unique protein                                                       |
| 123659 | + |   | + | + |   |   | 20.748<br>down | 5.487<br>down | cell wall protein. instantly related to <i>S. cerevisiae</i> Pir3p.  |
| 123663 | + | + | + | + | + | + |                |               | unknown protein                                                      |
| 123668 |   |   |   |   |   |   |                |               | N-acetyltransferase activity                                         |
| 123672 | + | + | + | + | + | + |                |               | Serine/Threonine protein kinase                                      |
| 123673 |   |   |   |   |   |   |                |               | Ankyrin                                                              |
| 123674 |   |   |   |   |   |   |                |               | unique protein                                                       |
| 123675 |   |   |   |   |   |   |                |               | unknown protein                                                      |
| 123680 | + | + | + | + | + | + |                |               | unknown protein                                                      |
| 123681 | + | + | + | + | + | + |                |               | short chain dehydrogenase/reductase                                  |
| 123686 | + | + | + | + | + | + |                |               | unknown protein                                                      |
| 123687 | + | + | + | + |   | + |                |               | unknown protein                                                      |
| 123690 | + | + | + | + | + | + |                |               | protein kinase. mago nashi protein                                   |
| 123695 | + | + | + | + | + | + | 1.705<br>up    | 2.807<br>up   | unknown protein                                                      |
| 123697 | + | + | + | + | + | + | 2.644<br>down  | 5.059<br>down | Unknown protein                                                      |
| 123699 | + | + | + | + | + | + |                |               | Zn2Cys6 transcriptional regulator                                    |
| 123702 | + | + | + |   |   |   |                |               | MFS permease                                                         |
| 123705 | + | + | + | + | + | + |                |               | UDP-glucose-6-dehydrogenase                                          |
| 123710 |   |   |   |   |   |   |                |               | unknown protein                                                      |
| 123713 |   |   | + |   |   |   |                |               | transcriptional regulatorMedA. involved in fruiting body development |
| 123714 | + | + | + | + | + | + |                |               | carbonic anhydrase                                                   |
| 123717 | + | + | + | + | + | + |                |               | Zn2Cys6 transcriptional regulator                                    |
| 123718 |   |   | + |   |   |   |                |               | amino acid transporter. neutral 11 TM                                |
| 123720 | + | + | + | + | + | + |                |               | 3-ketoacyl-CoA thiolase-like protein                                 |
| 123723 |   |   |   |   |   |   | 1.085<br>down  | 2.645<br>down | Arylacetamide deacetylase                                            |
| 123726 |   |   |   |   |   |   |                |               | glucan endo-1.3(4)- $\beta$ -D-glucosidase                           |
| 123729 | + | + | + | + | + | + |                |               | malate dehydrogenase                                                 |

|        |   |   |   |   |   |   |                |               |                                                             |
|--------|---|---|---|---|---|---|----------------|---------------|-------------------------------------------------------------|
| 123732 |   |   |   |   |   |   | 3.583<br>down  | 4.606<br>down | unique protein                                              |
| 123733 |   |   |   |   |   |   |                |               | HET protein                                                 |
| 123735 |   |   |   |   |   |   |                |               | heavy metal translocating P-type ATPase. putative           |
| 123738 | + | + | + | + | + | + |                |               | Arginase                                                    |
| 123740 | + | + | + | + | + | + | 1.430<br>down  | 2.305<br>down | unknown protein                                             |
| 123753 | + | + | + | + | + | + |                |               | ubiquitin/small ribosomal subunit protein 31 fusion protein |
| 123758 | + | + | + | + | + | + |                |               | unknown protein                                             |
| 123767 | + | + | + | + | + | + |                |               | Vacuolar protein sorting-associated protein Vps4            |
| 123771 | + | + | + | + | + | + |                |               | GCD. Glutaryl-CoA dehydrogenase                             |
| 123773 | + | + | + | + | + | + |                |               | Ubiquitin-conjugating enzyme                                |
| 123776 | + | + | + | + | + | + |                |               | unknown protein                                             |
| 123777 |   |   |   |   |   |   |                |               | unique protein                                              |
| 123779 |   |   |   |   |   |   | 1.577 up       | 2.671<br>down | unique protein                                              |
| 123780 | + | + | + | + | + | + |                |               | unknown protein                                             |
| 123786 |   |   |   |   |   |   |                |               | NRPS                                                        |
| 123787 |   |   |   |   |   |   |                |               | Zinc-containing alcohol dehydrogenase                       |
| 123795 | + | + | + | + | + | + |                |               | allantoinase                                                |
| 123797 |   | + | + |   |   |   |                |               | unique protein                                              |
| 123801 | + | + | + | + | + | + |                |               | aspartyl-tRNA synthetase. class IIb.                        |
| 123805 | + | + | + | + | + | + | 1.360<br>down  | 2.531<br>down | DHBP_synthase.-dihydroxy--butanone -phosphate synthase      |
| 123806 | + |   |   |   |   |   | 3.020<br>down  | 3.750<br>down | GPCR. secretin like                                         |
| 123809 | + | + | + | + | + | + |                |               | MFS permease                                                |
| 123818 |   |   | + |   |   |   | 23.487<br>down | 2.491 up      | GH11 endo-β-1.4-xylanase XYN2                               |
| 123820 | + | + | + | + | + | + |                |               | BCAT_beta_family                                            |

|        |   |   |   |   |   |   |               |               |                                                                                        |
|--------|---|---|---|---|---|---|---------------|---------------|----------------------------------------------------------------------------------------|
| 123827 | + | + | + | + | + | + | 1.521<br>down | 2.737<br>down | bifunctional catalase/peroxidase                                                       |
| 123831 | + | + | + | + | + | + |               |               | Serine/Threonine protein kinase                                                        |
| 123832 | + | + | + | + | + | + |               |               | Molecular chaperone DnaJ superfamily                                                   |
| 123837 | + | + | + | + | + | + |               |               | actin-like protein. centractin                                                         |
| 123842 | + | + | + | + | + | + |               |               | unknown protein                                                                        |
| 123850 | + | + | + | + | + | + | 1.270 up      | 2.171 up      | 60s acid ribosomal protein P1 based on homology to corresponding proteins in fungi and |
| 123860 | + | + | + | + | + | + |               |               | CCR4-NOT transcription complex subunit 3                                               |
| 123865 |   |   |   |   |   |   | 5.058 up      | 2.021 up      | Peptidase S8 and S53. subtilisin. kexin. sedolisin                                     |
| 123881 | + | + | + | + | + | + |               |               | Zn2Cys6 transcriptional regulator                                                      |
| 123882 | + | + | + | + | + | + |               |               | unknown protein                                                                        |
| 123884 |   |   |   |   |   |   |               |               | unknown protein                                                                        |
| 123888 | + | + | + | + | + | + | 2.767<br>down | 5.528<br>down | unknown protein                                                                        |
| 123890 | + | + | + | + | + | + |               |               | CDC3. Sporulation-specific                                                             |
| 123900 | + | + | + | + | + | + |               |               | ribosomal protein S9.                                                                  |
| 123902 | + | + | + | + | + | + |               |               | elongation factor 1. gamma chain.                                                      |
| 123903 | + | + | + | + | + | + |               |               | cell cycle control protein cwf16                                                       |
| 123911 |   | + |   |   |   |   |               |               | unknown protein                                                                        |
| 123914 |   |   |   |   |   |   |               |               | unique protein                                                                         |
| 123920 | + | + | + | + | + | + |               |               | Rho-GTPase activating protein. distantly related to Rga8                               |
| 123922 | + | + | + | + | + | + |               |               | Peptidyl-prolyl cis-trans isomerase. cyclophilin type                                  |
| 123928 | + | + | + | + | + | + |               |               | unknown protein                                                                        |
| 123934 | + | + | + | + | + | + |               |               | MGM1 protein. mitochondrial precursor                                                  |
| 123940 |   |   |   |   |   |   | 3.232<br>down | 40.577 up     | GH115 methylgluronoyl esterase CIP2                                                    |
| 123946 |   |   |   |   |   |   |               |               | dehydrogenase associated with cellulase signal transduction (PMID: 15288024)           |
| 123951 | + | + | + | + | + | + |               |               | unknown ER membrane protein                                                            |
| 123955 |   |   |   |   |   |   | 18.904 up     | 8.468 up      | Epl1/Sm1                                                                               |
| 123962 | + | + | + | + | + | + |               |               | unique protein                                                                         |

|        |   |   |   |   |   |   |   |   |   |            |            |  |                                                                       |
|--------|---|---|---|---|---|---|---|---|---|------------|------------|--|-----------------------------------------------------------------------|
| 123963 |   |   |   | + | + | + | + | + | + |            |            |  | unknown protein                                                       |
| 123965 |   |   |   | + | + | + | + | + | + |            |            |  | unknown protein                                                       |
| 123967 |   |   |   |   |   |   |   |   |   | 1.272 up   | 2.252 up   |  | HFB3                                                                  |
| 123968 |   |   |   |   | + | + |   |   |   | 3.090 up   | 2.561 up   |  | unknown protein                                                       |
| 123969 |   |   |   | + | + | + | + | + | + |            |            |  | unknown protein                                                       |
| 123974 |   |   |   | + | + | + | + | + | + |            |            |  | Vesicle coat complex COPI. beta` subunit                              |
| 123976 |   |   |   |   |   |   |   |   |   |            |            |  | unique protein                                                        |
| 123978 |   |   |   |   |   |   |   |   |   |            |            |  | GMC methanol oxidase                                                  |
| 123979 |   |   |   |   |   |   |   |   |   |            |            |  | peptide transporter MTD1                                              |
| 123987 |   |   |   |   |   |   |   |   |   |            |            |  | unknown protein                                                       |
| 123989 |   |   |   |   |   |   |   |   |   | 6.841 down | 2.485 up   |  | GH7 Cellobiohydrolase CBH1/CEL7a                                      |
| 123992 |   |   |   |   |   |   |   |   |   | 3.714 down | 3.757 up   |  | swollenin                                                             |
| 123999 | + | + | + |   | + |   |   |   |   | 2.266 up   | 2.361 up   |  | NADH:flavin oxidoreductase/NADH oxidase                               |
| 124000 |   |   |   | + | + | + | + |   | + |            |            |  | unknown protein                                                       |
| 124001 |   |   |   |   |   |   |   |   |   |            |            |  | Protein phosphatase 2C/pyruvate dehydrogenase (lipoamide) phosphatase |
| 124002 |   |   |   |   |   |   |   |   |   |            |            |  | Sexual differentiation process protein ISP4                           |
| 124007 |   |   |   |   |   |   |   |   |   |            |            |  | unknown protein                                                       |
| 124010 |   |   |   | + | + | + | + | + | + |            |            |  | 60S ribosomal protein L16 (L13 family).                               |
| 124016 |   |   |   | + | + | + |   |   |   |            |            |  | GH36 $\alpha$ -galactosidase AGL2                                     |
| 124022 |   |   |   |   |   |   |   |   |   | 8.500 down | 2.036 up   |  | Zn2Cys6 transcriptional regulator                                     |
| 124030 |   |   |   |   |   |   |   |   |   | 1.742 down | 2.166 down |  | unknown protein with TIM barrel                                       |
| 124031 |   |   |   | + | + | + | + | + | + |            |            |  | 20S proteasome beta-type subunit Pre9                                 |
| 124040 |   |   |   |   |   |   |   |   |   |            |            |  | unknown protein                                                       |
| 124043 |   |   |   |   |   |   |   |   |   | 1.241 up   | 8.695 up   |  | GH18. chitinase CHI18-14                                              |
| 124051 |   |   |   |   |   | + |   |   |   |            |            |  | alpha/beta hydrolase                                                  |
| 124052 |   |   |   | + | + | + | + | + | + |            |            |  | histone 2A                                                            |
| 124056 |   |   |   | + |   | + | + |   | + |            |            |  | phosphatidic acid phosphatase                                         |

|        |   |   |   |   |   |   |   |   |   |               |               |                                                                                          |
|--------|---|---|---|---|---|---|---|---|---|---------------|---------------|------------------------------------------------------------------------------------------|
| 124058 |   |   |   | + | + | + | + | + | + |               |               | unknown protein                                                                          |
| 124059 |   |   |   |   |   |   | + |   |   | 6.566<br>down | 2.088 up      | SSCRP                                                                                    |
| 124061 |   |   |   | + | + | + | + | + | + |               |               | unknown protein                                                                          |
| 124065 |   |   |   |   |   |   |   |   |   | 1.804<br>down | 6.623 up      | unknown protein. only in bacteria; contains large nuclear transport factor 2 domain      |
| 124079 |   |   |   |   |   |   |   |   |   | 1.365 up      | 2.734 up      | Multicopper oxidases                                                                     |
| 124083 |   |   |   |   |   |   |   |   |   |               |               | Epl1/Sm1                                                                                 |
| 124084 |   |   |   |   |   |   | + |   |   |               |               | unknown protein                                                                          |
| 124092 |   |   |   |   |   |   |   |   |   |               |               | unknown protein                                                                          |
| 124094 |   |   |   | + | + | + | + | + | + |               |               | unknown protein                                                                          |
| 124097 |   |   |   | + | + | + | + | + | + |               |               | phenazine biosynthesis protein phzF                                                      |
| 124101 |   |   |   | + | + | + | + | + | + |               |               | Nuclear transport factor 2                                                               |
| 124104 |   |   |   | + | + | + | + | + | + | 1.247<br>down | 2.473<br>down | unknown protein                                                                          |
| 124110 |   |   |   | + | + | + | + | + | + |               |               | Ribosomal protein L8                                                                     |
| 124113 |   |   |   |   | + | + |   |   |   |               |               | PTH11 GPCR                                                                               |
| 124115 |   |   |   | + | + | + | + | + | + | 1.640<br>down | 4.849<br>down | phosphoenolpyruvate carboxykinase AcuF                                                   |
| 124116 |   |   |   |   |   |   |   |   |   | 1.254 up      | 2.082<br>down | unknown protein                                                                          |
| 124117 |   |   |   | + | + | + | + | + | + |               |               | casein kinase II. beta (regulatory) subunit                                              |
| 124119 | + | + | + | + | + | + | + | + | + | 1.157<br>down | 3.788<br>down | unique protein                                                                           |
| 124132 |   |   |   | + | + | + | + | + | + |               |               | pH-response regulator protein palA/RIM20                                                 |
| 124134 |   |   |   |   |   |   |   |   |   |               |               | unknown protein                                                                          |
| 124136 |   |   |   |   |   |   |   |   |   |               |               | short chain dehydrogenase/reductase                                                      |
| 124141 |   |   |   |   |   |   |   |   |   |               |               | unknown protein                                                                          |
| 124148 |   |   |   | + | + | + | + | + | + |               |               | ubiquinol-cytochrome-C oxidoreductase complex III subunit VIII. 11kD protein of the UcrO |
| 124149 |   |   |   | + | + | + | + | + | + |               |               | ribosomal protein L7AE domain.                                                           |



|        |   |   |   |   |   |   |            |            |                                                                                              |
|--------|---|---|---|---|---|---|------------|------------|----------------------------------------------------------------------------------------------|
| 124157 | + | + | + | + | + | + | 1.051 up   | 3.312 down | unknown protein                                                                              |
| 124158 | + | + | + | + | + | + |            |            | N-acetyltransferase complex ARD1 subunit                                                     |
| 124169 |   |   |   |   |   |   |            |            | unknown protein                                                                              |
| 124170 |   |   |   |   |   |   | 1.352 down | 3.206 down | arsenite methyltransferase                                                                   |
| 124172 | + | + | + | + | + | + |            |            | protein kinase NPKA [E. nidulans]. probably involved in DNA damage signal transduction       |
| 124173 | + | + | + | + | + | + |            |            | SSCRP                                                                                        |
| 124174 | + | + | + | + | + | + |            |            | Peptidyl-prolyl cis-trans isomerase. cyclophilin type                                        |
| 124175 |   |   |   |   |   |   |            |            | GH64 endo-1.3-β-glucanase                                                                    |
| 124177 | + | + | + | + | + | + | 1.683 down | 2.586 down | unknown protein                                                                              |
| 124179 | + | + | + | + | + | + |            |            | cyclin-dependent protein kinase . putative                                                   |
| 124181 |   |   |   |   |   |   |            |            | Unknown protein with Tubulin_FtsZ domain.                                                    |
| 124187 | + | + | + | + | + | + | 1.166 up   | 2.551 up   | ER-associated protein degradation                                                            |
| 124195 | + | + | + | + | + | + |            |            | FeS cluster assembly scaffold IscU                                                           |
| 124198 |   |   |   |   |   |   |            |            | unknown protein                                                                              |
| 124202 | + | + | + | + | + | + |            |            | unknown protein                                                                              |
| 124205 | + | + | + | + |   | + |            |            | RNA polymerase III transcription initiation factor complex (TFIIIC) subunit part of the TauA |
| 124206 | + | + | + | + | + | + |            |            | ribosomal protein S10                                                                        |
| 124210 | + | + | + | + | + | + | 1.144 up   | 2.673 up   | histone H3                                                                                   |
| 124222 | + | + | + | + | + | + | 1.336 down | 4.232 down | CaaX-protease. related to E. nidulans rce1. involved in signal transduction                  |
| 124223 | + | + | + | + | + | + |            |            | unknown protein                                                                              |
| 124228 |   |   |   |   |   |   | 1.455 down | 3.406 down | GT2 chitin synthase                                                                          |
| 124234 | + | + | + | + | + | + |            |            | adenylate cyclase associated protein (CAP)                                                   |
| 124246 | + | + | + | + | + | + | 1.375 up   | 2.022 up   | unknown protein                                                                              |
| 124249 |   | + | + |   |   |   | 2.271 up   | 3.665 up   | unknown protein                                                                              |
| 124256 |   | + | + |   |   |   | 1.855 up   | 4.359 up   | phospholipase-like protein                                                                   |
| 124259 |   |   |   |   |   |   |            |            | SSCRP                                                                                        |

|        |   |   |   |   |   |   |               |               |                                       |
|--------|---|---|---|---|---|---|---------------|---------------|---------------------------------------|
| 124260 |   |   |   |   |   |   | 1.123<br>down | 2.464<br>down | Zn2Cys6 transcriptional regulator     |
| 124277 |   |   |   |   |   |   |               |               | SSCRP                                 |
| 124278 | + | + | + | + | + | + | 1.907 up      | 2.834 up      | unknown protein with EXS domain       |
| 124282 |   | + |   |   |   |   |               |               | unknown protein. SET and MYND domain  |
| 124283 |   |   |   |   |   |   | 3.244 up      | 7.355 up      | unknown protein. SET and MYND domains |
| 124285 | + | + | + | + | + | + |               |               | small nuclear ribonucleoprotein Sm D1 |
| 124286 |   | + |   |   |   |   | 1.274<br>down | 2.340<br>down | Heteromeric CCAAT factors             |
| 124288 |   |   |   |   |   |   |               |               | unknown protein                       |
| 124293 | + | + | + | + | + | + |               |               | unknown protein                       |
| 124295 | + | + | + | + | + | + | 3.114<br>down | 3.010 up      | SSCRP                                 |
| 124296 |   |   |   |   |   |   | 2.810<br>down | 2.316 up      | unique protein                        |

\* presence of one of the specified methylations is indicated by "+"; cells lacking + exhibit no methylation. The color code is the same as used in Supplementary Table S2.
